# Supplementary material for: Global hypo-methylation in a proportion of glioblastoma enriched for an astrocytic signature is associated with increased invasion and altered immune landscape
Source: eLife journal article supplement (doi:10.7554/elife.77335), 2022-11-02
Supplement: fig1-data1 [file Figure1A_1H_dmp_res_specific.xlsx]

## Sheet: 017
probe_id	median_change
cg00009167	-1.72221
cg00026375	-2.90649
cg00032609	1.29716
cg00097081	-1.76719
cg00099768	-1.51504
cg00106073	-0.519527
cg00119117	-3.46331
cg00138474	-3.60015
cg00149585	-2.51342
cg00192882	-5.11355
cg00220492	-4.93842
cg00258409	-3.62547
cg00261665	-1.04169
cg00264433	2.52605
cg00289258	-4.01416
cg00295887	-1.09916
cg00321850	-1.19649
cg00325866	2.75521
cg00342298	-1.41005
cg00354572	-1.68208
cg00405620	-2.97141
cg00428624	-1.49591
cg00456672	2.31837
cg00474049	-4.13699
cg00479535	-0.861512
cg00501711	-3.76872
cg00521630	2.29946
cg00538923	2.67261
cg00559018	-1.17563
cg00561145	-2.62325
cg00576331	-0.638233
cg00599280	-0.584956
cg00609424	-3.6527
cg00616243	-0.603267
cg00648301	-4.46002
cg00659991	-2.19092
cg00664084	1.30356
cg00693344	-1.52984
cg00699901	-0.992003
cg00704305	-0.463785
cg00710286	-3.48888
cg00730561	-2.46013
cg00734838	-4.74563
cg00746342	0.272002
cg00763096	-0.495188
cg00796360	-2.80099
cg00870662	-4.29522
cg00877964	-1.15402
cg00886812	-0.825177
cg00931514	-1.98562
cg00944388	-0.376103
cg00958927	-1.68888
cg00966890	-0.684064
cg01023778	5.70173
cg01033463	-4.57677
cg01049274	-3.2176
cg01069753	-2.75122
cg01072942	-1.6052
cg01087663	-1.00341
cg01092811	-1.28759
cg01095590	-1.60218
cg01108476	-0.388964
cg01111245	-2.43081
cg01116067	-3.07595
cg01134012	-1.95496
cg01134436	-2.97052
cg01143804	-3.8461
cg01158680	-0.414351
cg01226447	-2.3105
cg01240094	-3.50683
cg01245787	-0.298735
cg01263479	4.22179
cg01283289	-1.90547
cg01329093	-4.16228
cg01351869	3.53232
cg01353677	-2.26688
cg01382982	-5.11352
cg01383890	3.85726
cg01394093	-1.63159
cg01396112	-0.963905
cg01429321	-0.557651
cg01455880	1.05798
cg01467419	-1.49107
cg01503881	-2.49414
cg01536011	-0.542853
cg01544215	-0.261982
cg01547494	-1.7093
cg01564892	-0.752596
cg01624763	-2.12663
cg01644723	-0.99001
cg01665123	-3.40316
cg01708636	-1.52479
cg01772700	0.022299
cg01775414	-0.385676
cg01789728	-2.10962
cg01808492	0.20396
cg01813841	-1.70332
cg01824804	-0.155598
cg01843524	-0.463786
cg01861130	-0.820345
cg01868835	-3.63583
cg01910869	-0.546981
cg01949073	-2.89284
cg01950665	-2.48584
cg01952843	-2.81822
cg01959995	-0.841828
cg01962105	-0.43732
cg01985965	-0.499533
cg01995480	-4.26206
cg02060902	-1.33139
cg02103895	0.148368
cg02117414	-2.61005
cg02146091	4.50757
cg02147695	-0.716571
cg02182210	-2.44046
cg02183105	0.402174
cg02201766	-3.41766
cg02203106	-0.654552
cg02219117	-2.68807
cg02256969	-0.234947
cg02267312	-5.93314
cg02267488	-2.68076
cg02278307	-1.57665
cg02282626	-1.63047
cg02309335	-0.567377
cg02323029	-3.11622
cg02336128	-2.01973
cg02353165	-2.05361
cg02354107	-1.65217
cg02355457	-0.388693
cg02361229	-3.90826
cg02386859	-2.11783
cg02403180	-1.27576
cg02443062	6.67162
cg02454464	0.794658
cg02466918	-4.81162
cg02481842	-2.37931
cg02489006	-2.88633
cg02497414	-4.05338
cg02516388	-1.72301
cg02523844	-0.90782
cg02527781	0.523601
cg02533120	-0.756407
cg02548238	-2.11375
cg02556401	5.64467
cg02564134	-1.51686
cg02569236	-0.937098
cg02586730	-3.33573
cg02628902	-0.48038
cg02666184	-4.08324
cg02685650	-0.94426
cg02699069	-0.42243
cg02731293	0.0350197
cg02736602	-0.809409
cg02752765	-1.98634
cg02763101	-5.84716
cg02776314	-3.22325
cg02792829	-4.47876
cg02817839	-1.79075
cg02837212	-4.48847
cg02837279	-2.37916
cg02848062	-3.76554
cg02865447	-2.01238
cg02873991	-4.94963
cg02886284	-0.176046
cg02941376	-0.553939
cg02943359	-0.967114
cg02957918	0.524789
cg02976568	-0.448843
cg03009871	-2.53751
cg03027876	-1.83152
cg03035538	-2.06765
cg03064080	-3.73088
cg03078339	-1.71424
cg03080377	-1.46431
cg03080820	-4.31313
cg03084103	-1.39487
cg03086857	-3.3786
cg03108330	-1.00045
cg03138854	0.387929
cg03164043	0.281164
cg03173570	-3.67629
cg03191998	-0.469982
cg03200105	-1.09359
cg03200502	4.10974
cg03215005	-1.38226
cg03227148	-2.04801
cg03247389	-3.01494
cg03252700	-2.9916
cg03267254	-3.99501
cg03275056	-3.68102
cg03280624	-5.22153
cg03290826	-1.32859
cg03303747	-2.65403
cg03307092	0.0203647
cg03338682	-2.4902
cg03344570	-0.612876
cg03368643	-6.31343
cg03380643	-0.531677
cg03405092	-3.04286
cg03415883	-0.646742
cg03453568	3.56756
cg03461399	-4.92217
cg03464689	-0.406904
cg03465206	-0.749742
cg03472212	-0.699439
cg03481131	-4.42976
cg03485042	4.56874
cg03499052	-1.30433
cg03499639	2.08665
cg03539511	-1.71375
cg03551964	-4.80233
cg03568975	-4.23422
cg03579738	-4.89046
cg03585731	0.0568747
cg03612092	-2.1312
cg03619973	-0.110802
cg03627015	-1.98114
cg03629577	-4.08054
cg03632145	3.05854
cg03639367	-1.61613
cg03642513	-1.85201
cg03643149	4.04751
cg03651478	-1.77903
cg03697693	-1.35055
cg03716999	-2.7895
cg03717830	-6.06534
cg03734402	-0.134053
cg03779241	-0.201685
cg03780079	-1.50622
cg03812920	-2.60594
cg03825231	-0.860645
cg03835378	-1.49985
cg03839625	-2.62816
cg03943177	0.0178671
cg03995486	-3.18023
cg04004297	-0.439008
cg04013093	-2.68205
cg04013595	-2.21369
cg04041410	-1.55233
cg04042753	-3.87281
cg04048259	-4.62146
cg04058930	-1.65781
cg04078608	-2.20731
cg04116858	-1.61874
cg04130057	-0.242461
cg04172000	-0.329449
cg04191208	-0.960169
cg04199943	-0.76738
cg04252242	-1.08596
cg04278162	-5.55128
cg04304927	-2.76739
cg04315264	5.30815
cg04317543	-0.341726
cg04322978	-2.28765
cg04327529	-0.494886
cg04385753	-3.26483
cg04390523	-1.86614
cg04416895	-0.442824
cg04419740	-3.06839
cg04443039	-2.76634
cg04483720	-0.932989
cg04486778	-1.91373
cg04492769	-2.06592
cg04510085	2.82453
cg04531425	-2.01706
cg04536807	-0.550062
cg04551011	0.478389
cg04569583	-0.0059254
cg04589027	-0.459892
cg04611437	-1.2407
cg04627496	-0.833065
cg04652097	-2.47469
cg04670553	2.61967
cg04671932	-0.897236
cg04706597	-0.938012
cg04724720	-1.10684
cg04774194	-0.324185
cg04774966	-0.17272
cg04785838	-4.54628
cg04819351	0.539992
cg04835284	-1.08422
cg04840415	3.15337
cg04843775	-0.153226
cg04857420	-2.94108
cg04870657	-2.04648
cg04884011	-0.63971
cg04922971	-5.14584
cg04949741	-1.03898
cg04958845	-3.21289
cg04959837	-3.10997
cg04961189	-2.94695
cg04992991	-2.38495
cg04994773	-0.582996
cg05006903	-1.75634
cg05056305	-1.60092
cg05064078	-0.194275
cg05064489	-0.950041
cg05080764	-0.987665
cg05108160	-1.2696
cg05115375	-1.65819
cg05143887	-1.95747
cg05165990	-4.56521
cg05174924	-3.28913
cg05193512	-3.10374
cg05198819	-3.76678
cg05204123	-2.45627
cg05234760	-1.98193
cg05256605	-4.16099
cg05257196	-2.21489
cg05258927	-0.771956
cg05270344	-2.74932
cg05338009	4.75067
cg05361542	-2.13015
cg05361728	0.0716392
cg05379947	3.95209
cg05393023	-1.0608
cg05404729	-0.716111
cg05436500	-2.06358
cg05452836	3.5802
cg05479791	-0.582698
cg05490519	-3.9693
cg05552183	0.119871
cg05555116	-3.25898
cg05556477	-1.83234
cg05562817	-3.89546
cg05576925	-4.19257
cg05604486	-5.02124
cg05616278	-3.84867
cg05642143	-2.35748
cg05662404	-2.07509
cg05666055	-2.35819
cg05674466	-0.92146
cg05677741	-1.45743
cg05694971	-2.40399
cg05700333	-2.10781
cg05756998	-0.588801
cg05765580	-3.29514
cg05780177	-1.52044
cg05797937	-1.45145
cg05833318	-0.688925
cg05837401	-1.29994
cg05846365	-0.302201
cg05864696	0.618067
cg05867154	-2.34705
cg05872073	-2.39262
cg05877425	-0.369392
cg05895034	-4.30474
cg05897048	-4.24254
cg05902852	-2.97976
cg05952642	-1.18964
cg06003169	-0.870245
cg06055551	-2.86996
cg06057566	-1.31405
cg06059849	-0.753157
cg06065225	-4.45303
cg06069616	-3.35106
cg06083604	0.207751
cg06099459	-0.710732
cg06102777	-0.738159
cg06179060	-0.475931
cg06187103	-3.08843
cg06209740	0.883406
cg06211346	-3.75558
cg06223569	-4.72527
cg06240450	-0.814828
cg06247015	-1.4701
cg06279252	-4.33009
cg06340416	-0.388191
cg06369583	-2.33097
cg06377152	-5.09733
cg06379531	-4.41578
cg06435046	-2.06998
cg06508445	-0.315994
cg06524099	-1.79267
cg06541188	-1.02008
cg06554361	-4.43969
cg06575144	-2.53956
cg06668703	1.51734
cg06671340	-1.18255
cg06674304	-2.65219
cg06745030	-3.34899
cg06768655	-0.157434
cg06777522	-0.347575
cg06809544	-3.10044
cg06835628	-1.03415
cg06839900	-4.05216
cg06855497	1.73134
cg06867065	-5.16317
cg06906980	-0.0439215
cg06913228	-2.18092
cg06915165	-4.14521
cg06952671	-0.825845
cg06968155	-1.01399
cg06973293	-2.17843
cg06978204	-5.12491
cg06992027	0.129241
cg07013326	-2.57183
cg07015368	-3.06973
cg07029707	-1.74507
cg07034362	-0.814111
cg07035515	0.4714
cg07067171	-1.04575
cg07078644	-1.50414
cg07080653	-4.77235
cg07083896	0.0531356
cg07093639	-0.203977
cg07096206	-1.8106
cg07120993	-2.71267
cg07129104	-2.55835
cg07129273	-0.950763
cg07129725	-3.17048
cg07135042	-2.16672
cg07211292	-3.33478
cg07218625	1.16205
cg07233159	-2.3942
cg07235562	-1.87686
cg07239293	-0.508641
cg07267550	1.11565
cg07306197	-3.67899
cg07312445	-3.636
cg07330230	-2.23785
cg07340458	-2.66784
cg07341690	-2.49576
cg07369113	-3.50812
cg07385577	-1.82314
cg07392048	-2.53787
cg07392897	-1.34141
cg07421809	-0.746712
cg07422279	-0.917116
cg07448060	-3.02383
cg07483273	-2.07678
cg07495027	-5.19731
cg07505725	-1.24708
cg07513276	-1.59809
cg07516511	-3.486
cg07538946	-2.39033
cg07547781	-2.44794
cg07550334	-0.684951
cg07589201	-3.0342
cg07691761	-3.08581
cg07725318	-2.28136
cg07727884	-2.38757
cg07757224	-3.20511
cg07773095	-4.84665
cg07778983	1.03053
cg07800320	-0.673143
cg07830103	-1.76884
cg07838681	-2.14498
cg07847949	-0.599277
cg07850464	-3.50366
cg07911865	-1.30431
cg07923390	0.298171
cg07928979	-3.81239
cg07934217	-1.02017
cg07941301	-0.0254848
cg07974719	-6.56842
cg07985720	-0.144515
cg08015159	-4.56055
cg08049736	0.102471
cg08055924	-4.49678
cg08118273	-2.58893
cg08157579	-1.01256
cg08186900	0.285391
cg08198517	-1.11051
cg08200404	0.222143
cg08203682	4.1687
cg08230118	-6.52572
cg08232403	-1.64854
cg08249180	-2.84082
cg08261177	1.67374
cg08263743	-3.94394
cg08314603	-0.764191
cg08318212	-2.78464
cg08321129	0.0226445
cg08328671	-1.52993
cg08336435	-3.12584
cg08342619	-5.12784
cg08427928	-3.96405
cg08431704	-1.902
cg08464824	-4.69456
cg08481491	-4.99384
cg08493169	-1.68315
cg08508368	-2.17068
cg08518568	-2.14482
cg08529260	1.68951
cg08533932	-2.24501
cg08552900	-0.0770969
cg08557517	-1.52262
cg08563437	-0.701374
cg08606504	-3.25919
cg08611163	-3.20109
cg08623535	-2.92392
cg08634041	-5.17333
cg08634464	-1.82793
cg08641579	-3.84414
cg08658497	-2.62447
cg08661227	-0.456522
cg08681365	-0.978051
cg08688335	-1.59626
cg08746138	-0.833086
cg08770523	-2.47209
cg08854169	-3.96653
cg08870433	-5.62451
cg08873628	-0.900853
cg08889044	-1.15975
cg08892684	0.0102355
cg08912051	-2.81413
cg08920068	-0.312086
cg08920745	-6.52517
cg08927006	1.94901
cg08958598	-0.120764
cg09005679	-2.66588
cg09016639	-2.32832
cg09019938	-2.37666
cg09022458	-0.261033
cg09059237	-1.44593
cg09084877	-0.300274
cg09108797	4.07296
cg09138368	-1.49965
cg09152886	-4.29328
cg09167119	0.565355
cg09213696	0.680234
cg09219721	-4.66373
cg09225503	-4.12208
cg09233315	-3.05357
cg09262269	-2.09816
cg09264112	-1.66205
cg09304272	-1.08367
cg09317036	-1.1088
cg09321494	-1.03988
cg09328228	-2.74857
cg09337082	-1.65111
cg09347959	-4.66783
cg09365529	1.26708
cg09382845	-1.68205
cg09384137	-2.57242
cg09436375	-2.15693
cg09443311	-3.01622
cg09447622	-2.56735
cg09447808	-0.712483
cg09499414	0.070209
cg09511126	2.3196
cg09512393	-0.0464891
cg09526205	-4.47654
cg09568464	-6.25091
cg09591866	-1.45024
cg09606564	-3.14519
cg09610601	-1.18789
cg09670485	-1.50054
cg09672113	5.22362
cg09686185	-1.6891
cg09699369	-3.2094
cg09705117	2.41006
cg09711841	-0.705358
cg09725195	0.786677
cg09730672	-0.897877
cg09745688	-3.89414
cg09750385	4.02955
cg09786383	-2.06427
cg09820792	-1.95662
cg09827752	-3.14164
cg09854746	-2.30909
cg09912350	3.81426
cg09927529	-4.53928
cg09962298	-3.20241
cg10005581	0.0546145
cg10016380	-0.35703
cg10023249	3.72373
cg10037053	-0.573572
cg10041441	-2.79463
cg10056627	-1.89704
cg10080155	-4.61305
cg10098358	-0.5424
cg10104482	-3.46386
cg10160407	0.415296
cg10181410	-1.09504
cg10187221	-0.507024
cg10189525	-1.87996
cg10219093	-3.12123
cg10267817	-1.1637
cg10293422	0.271795
cg10351914	-1.23308
cg10354813	4.28476
cg10368518	-2.55814
cg10381888	3.33921
cg10387769	-2.0408
cg10418908	-1.55207
cg10441726	4.30747
cg10526659	0.228822
cg10526841	-0.151005
cg10529000	-1.5294
cg10546150	-5.76485
cg10574074	-0.291685
cg10620012	2.57822
cg10640510	0.663044
cg10643407	-4.43487
cg10661629	-3.73103
cg10679755	3.81881
cg10719363	-0.962755
cg10724947	2.04784
cg10731192	6.48974
cg10733249	-3.91396
cg10761979	-0.50639
cg10764762	-3.32374
cg10789281	-2.27244
cg10793756	-0.071192
cg10830822	-1.50945
cg10858568	-1.45106
cg10862848	-0.643679
cg10907062	-4.41214
cg10908973	-2.48043
cg10975057	-1.287
cg10991578	-0.201758
cg11015038	-1.6518
cg11022432	-2.93571
cg11043571	-2.2523
cg11074192	-3.12994
cg11109374	-1.07541
cg11110570	0.0964171
cg11113644	-2.7519
cg11117531	-1.28299
cg11125795	-6.02139
cg11162249	-4.90825
cg11244858	-1.33163
cg11270815	-4.43757
cg11286977	-5.86125
cg11303701	-1.07726
cg11341438	-2.19711
cg11409096	-1.23937
cg11420359	2.06014
cg11428482	0.151281
cg11450001	-2.58512
cg11457353	-1.11813
cg11461694	-0.625031
cg11520554	0.277732
cg11525479	-2.50832
cg11532267	-1.19669
cg11595749	-1.45341
cg11620984	-0.485194
cg11649040	4.68442
cg11654333	-1.41089
cg11659501	-1.82164
cg11674690	-3.74199
cg11718235	-5.11133
cg11722183	-1.09626
cg11740878	-3.33007
cg11764177	-2.63972
cg11816981	-1.65438
cg11852643	-2.71143
cg11855022	-0.750055
cg11866527	-2.0329
cg11878365	-0.575031
cg11899374	-0.0947195
cg11908570	-1.1047
cg11944428	-4.88985
cg11947981	-2.56361
cg11960393	0.85617
cg11970192	4.62612
cg11973900	-1.9371
cg11980090	-5.73966
cg12022294	-0.859359
cg12034791	-2.66888
cg12053769	-1.1884
cg12057741	-0.914916
cg12066398	-1.4655
cg12084411	-0.704051
cg12103149	0.088807
cg12109566	-0.872175
cg12120741	-5.09825
cg12138818	-3.32636
cg12140668	-0.1778
cg12149272	-5.83976
cg12154153	-0.442503
cg12173620	0.666677
cg12175311	-0.80537
cg12215535	-0.295279
cg12263602	-0.712198
cg12280168	-4.23829
cg12334705	-2.23412
cg12351815	-3.92573
cg12364523	-3.34106
cg12381164	-4.84679
cg12441791	-2.99234
cg12445208	-3.60873
cg12454419	-1.33334
cg12457210	-2.58068
cg12468328	-1.19204
cg12482557	-2.22841
cg12495687	-0.5816
cg12545993	-2.11724
cg12580445	-1.20487
cg12588323	-2.99623
cg12602112	0.0984274
cg12605796	-1.56821
cg12606138	-2.49822
cg12662193	4.30968
cg12662206	-4.60991
cg12682392	-1.6441
cg12686110	-1.46352
cg12703371	-1.71173
cg12726807	-1.82697
cg12739647	-0.749544
cg12758231	-1.84603
cg12792044	-0.294956
cg12847373	-1.45486
cg12886812	-1.08365
cg12911256	-1.81248
cg12935136	-1.8059
cg12937378	-0.550082
cg12983394	-4.81638
cg13006202	-0.592265
cg13014531	-4.57368
cg13030582	-2.68602
cg13063673	-0.782828
cg13082958	-4.25424
cg13097248	-1.39235
cg13107428	-2.45829
cg13118072	-0.500651
cg13122031	-0.713183
cg13140770	-3.62882
cg13151889	-3.05518
cg13177342	-4.74591
cg13268132	-0.297806
cg13273396	-0.698633
cg13279675	-5.36683
cg13300549	-5.25887
cg13311509	-2.14405
cg13326227	-4.64078
cg13341453	-5.72135
cg13348877	-5.61341
cg13382769	-1.77066
cg13384966	-5.64518
cg13393978	-2.39437
cg13396830	-5.95753
cg13397359	-2.53215
cg13423262	-3.33763
cg13434989	-0.65814
cg13495111	-0.458838
cg13507964	-1.70584
cg13518195	-3.59441
cg13535604	-2.14273
cg13562386	0.563631
cg13580857	-4.04754
cg13593090	-3.74606
cg13606285	-3.25859
cg13615322	3.84477
cg13632058	-0.367605
cg13634560	-2.50131
cg13636373	-0.724182
cg13652314	-1.83295
cg13657446	-0.892342
cg13690864	10.0167
cg13737332	0.972836
cg13755924	-0.529454
cg13773705	-0.787532
cg13785718	-2.72708
cg13817182	-1.5465
cg13818654	-5.27601
cg13884546	1.69293
cg13904267	-1.03136
cg13916322	-1.02489
cg13916740	-6.47085
cg13919285	0.0552262
cg13932362	-2.00474
cg13971571	-1.38938
cg13973595	-2.04198
cg14013591	-1.55543
cg14029100	-3.96131
cg14070815	-3.75493
cg14078385	-2.82374
cg14086160	-1.10648
cg14142171	-0.160284
cg14166395	-1.28572
cg14175568	5.23276
cg14183206	0.700803
cg14196790	-2.12377
cg14206710	-4.54307
cg14270835	-1.18045
cg14283602	-2.50805
cg14290451	4.60703
cg14296767	-2.17593
cg14320633	-1.82302
cg14338887	-1.53143
cg14426001	-4.44248
cg14442408	-3.20812
cg14498972	-2.53159
cg14506646	-3.50417
cg14523810	-2.75749
cg14527148	0.512355
cg14533885	0.584101
cg14546350	-0.366217
cg14560835	-4.67818
cg14562060	-0.0916602
cg14592474	-4.09988
cg14593306	2.65935
cg14596431	-0.675285
cg14598116	-2.04109
cg14621784	-2.38997
cg14633426	-2.66584
cg14672994	-3.19542
cg14684842	-1.86386
cg14687540	0.0758026
cg14694232	-0.661677
cg14721632	-2.70742
cg14725858	-0.416891
cg14731413	-2.78332
cg14744828	-0.937625
cg14773259	-2.16428
cg14776518	-1.17452
cg14786713	-0.59728
cg14834568	-1.57185
cg14837165	-3.87161
cg14843080	-0.0875892
cg14847009	-1.50097
cg14849421	-1.65698
cg14860473	-0.051998
cg14886794	-1.95313
cg14888568	-1.38983
cg14924091	-1.7741
cg14952224	-0.586424
cg14986845	-5.2685
cg15018282	-6.98247
cg15026026	-0.45486
cg15111469	-0.121254
cg15119221	-4.48562
cg15143070	-4.52378
cg15160057	-4.15611
cg15175581	-4.48506
cg15210108	-2.88408
cg15219506	-1.57341
cg15247434	-3.2219
cg15279002	-4.04438
cg15328582	-0.208999
cg15339058	-4.48177
cg15386773	-6.4495
cg15400731	-1.97267
cg15460816	-0.582047
cg15463044	3.91739
cg15512352	-0.880471
cg15541193	-2.00287
cg15576576	1.99333
cg15584788	-1.0873
cg15588266	-0.746846
cg15590217	-2.95793
cg15603766	4.71742
cg15607708	4.74637
cg15617847	-1.63932
cg15643885	0.591367
cg15673731	-1.07119
cg15679813	-0.406706
cg15696588	-3.51878
cg15699226	-4.14804
cg15713362	-2.09985
cg15727925	-3.90903
cg15738769	-3.04439
cg15779323	-3.21425
cg15784913	-2.63421
cg15798800	-2.7993
cg15815607	5.16249
cg15836660	-4.52302
cg15892963	-4.74782
cg15903421	-0.3217
cg15920017	-3.57519
cg15923947	-3.28829
cg15979759	-1.9984
cg16020674	1.68873
cg16057262	-1.44439
cg16086310	-0.948658
cg16094412	-4.40003
cg16107628	-2.59864
cg16124337	-0.127218
cg16134800	-2.60886
cg16143176	-2.32397
cg16143763	2.07663
cg16150678	-0.440121
cg16152482	-2.71172
cg16177076	-0.0966832
cg16192717	0.0727025
cg16205854	-1.46056
cg16250461	-2.33939
cg16268429	-0.886393
cg16274199	0.324438
cg16295162	-1.72345
cg16300509	0.0400011
cg16312163	-0.346083
cg16345226	-4.73513
cg16347018	-2.18571
cg16361301	-0.957328
cg16417563	-6.63025
cg16425048	-0.37814
cg16433833	-4.31534
cg16468822	-1.58384
cg16484526	0.105513
cg16484943	-2.25223
cg16497583	-1.1188
cg16507861	-3.36501
cg16530818	-1.17681
cg16534103	-0.345233
cg16541628	-2.48445
cg16542006	-1.89551
cg16546006	-1.72096
cg16553796	-0.361519
cg16571983	-2.67258
cg16580759	-1.97201
cg16590910	-2.11883
cg16619193	-2.10188
cg16620731	-1.07423
cg16643618	3.69587
cg16647868	0.0161199
cg16658719	-4.38097
cg16662919	-0.478479
cg16682276	-0.68376
cg16722947	1.12436
cg16733866	-4.14747
cg16739796	-0.98203
cg16763708	-0.888562
cg16771170	-2.13945
cg16785077	0.508807
cg16797831	0.398636
cg16797983	0.0249943
cg16800975	-0.0291128
cg16808910	-0.514747
cg16825290	7.16181
cg16852115	-0.143636
cg16867461	-1.3576
cg16884363	0.138611
cg16899280	-3.96107
cg16917279	3.14455
cg16919074	-1.71641
cg16922807	-0.839129
cg16933706	-6.73505
cg16941029	2.16591
cg16956543	-3.80967
cg16963632	-3.24243
cg17041937	-0.843953
cg17047882	2.74827
cg17146570	-4.25251
cg17156855	-3.66869
cg17181325	-0.333786
cg17223176	-3.63612
cg17253939	-1.73378
cg17255214	-2.85
cg17265923	-2.9633
cg17293641	0.389947
cg17303851	0.0122264
cg17324776	4.16909
cg17327401	-0.947134
cg17345569	-1.52554
cg17448575	-0.454774
cg17454592	-2.58556
cg17463145	-1.72149
cg17491517	-4.54238
cg17494210	-1.79841
cg17512353	-3.15417
cg17515966	-2.0341
cg17549365	-2.98223
cg17579113	-2.88229
cg17592734	-4.32422
cg17611742	1.81648
cg17644100	-0.924496
cg17644772	-2.65567
cg17652174	-0.459016
cg17675125	-0.356808
cg17689921	-2.85263
cg17691662	-3.83378
cg17714276	0.48305
cg17723299	-0.691377
cg17736840	-0.371963
cg17755964	-5.96825
cg17789800	-4.75078
cg17835678	3.21882
cg17840843	6.70649
cg17845761	-2.30534
cg17863217	4.79027
cg17863743	4.56397
cg17873465	-2.46421
cg17880166	-0.0520972
cg17880703	-3.59728
cg17884761	-1.3729
cg17900188	-1.7923
cg17918777	5.43791
cg17935035	-1.94049
cg17951613	-2.98026
cg17952468	-2.11597
cg17973039	-4.08406
cg17981666	5.84127
cg17991919	-0.341188
cg17996128	-0.817959
cg18018828	-3.83613
cg18024801	2.51063
cg18032190	-0.197991
cg18036763	-2.2702
cg18040786	-0.684865
cg18068919	-0.470031
cg18075287	-6.98612
cg18091275	-3.46945
cg18096620	-1.37649
cg18126791	-0.601828
cg18132212	-4.52221
cg18167179	-3.52568
cg18198896	-2.49356
cg18199441	-5.86443
cg18200974	-3.76889
cg18214799	-0.321476
cg18226335	-1.38113
cg18241904	-7.17499
cg18243046	-2.92128
cg18277508	-2.86215
cg18325521	-1.14283
cg18326657	-2.01265
cg18345369	-3.04144
cg18379413	-1.69387
cg18421748	-2.6076
cg18471471	-1.28354
cg18499443	1.65807
cg18528082	-0.637775
cg18556540	0.265855
cg18558073	-4.00978
cg18568990	-0.277429
cg18577511	6.99246
cg18580622	-1.70004
cg18587104	-2.63163
cg18616757	-2.97231
cg18621863	-4.64185
cg18658096	6.89602
cg18680061	-5.16006
cg18699112	-3.972
cg18701351	-2.04064
cg18708075	-2.42571
cg18716861	-0.481373
cg18721596	-2.64024
cg18763326	-0.803972
cg18763656	-3.53651
cg18801263	-0.419723
cg18818563	-5.98514
cg18841691	-1.08971
cg18841894	-1.32719
cg18866529	3.89215
cg18880390	-2.38324
cg18901963	-4.46898
cg19042136	-1.72692
cg19051105	-3.77453
cg19070139	-2.27623
cg19107291	-1.51445
cg19118797	-1.71665
cg19121462	-1.33018
cg19161424	-2.62546
cg19180828	-2.08406
cg19194373	-1.25824
cg19241958	-1.61264
cg19294311	2.79298
cg19319774	-3.75608
cg19328294	-5.22757
cg19359218	-5.65755
cg19379625	-0.681936
cg19392911	3.59738
cg19397765	-5.66673
cg19419515	-3.9631
cg19428722	5.89466
cg19452685	-4.25479
cg19458257	-2.31143
cg19497071	-4.03204
cg19545623	-2.83413
cg19599407	-3.72948
cg19620294	-6.43356
cg19634242	-2.99535
cg19635897	-4.1001
cg19650157	0.100706
cg19661902	0.0522851
cg19673462	-0.456578
cg19716981	-2.37659
cg19742055	-0.287433
cg19748341	-2.69166
cg19759502	-3.83313
cg19769411	-3.19311
cg19786920	-4.55908
cg19857776	-1.64481
cg19878838	-2.38117
cg19907511	-1.11508
cg19916212	-0.284898
cg19916409	-2.17407
cg20005057	-5.24745
cg20018234	-1.53177
cg20034202	-2.95479
cg20051715	-3.45225
cg20053829	-0.527343
cg20066567	-1.71139
cg20067477	-0.263372
cg20118020	-1.05484
cg20129782	3.09811
cg20136236	-2.02164
cg20242728	-2.60074
cg20247048	-3.49453
cg20270932	-1.82796
cg20271396	-1.1708
cg20295949	-1.6499
cg20406235	-3.79028
cg20415809	-0.235427
cg20416031	-0.0338657
cg20421279	-0.382943
cg20430847	-5.1088
cg20431135	-4.93537
cg20434825	-4.92421
cg20451561	-2.08346
cg20451722	-2.31753
cg20453264	-2.9906
cg20480045	-1.27012
cg20484352	-0.370213
cg20488249	-4.53496
cg20495645	0.347573
cg20499965	-5.43819
cg20503956	-3.60635
cg20525183	-0.539583
cg20530056	-3.23063
cg20537629	-2.03894
cg20586531	-0.848292
cg20646939	1.75353
cg20666271	-4.16738
cg20671059	-1.6376
cg20696478	-3.58356
cg20703137	-0.358427
cg20715343	-4.4289
cg20776939	-0.227694
cg20778265	-3.90485
cg20831708	-2.5441
cg20848987	4.78078
cg20878721	0.280251
cg20910807	-1.0118
cg20954977	-3.40086
cg20962297	-3.16394
cg20984085	-5.22063
cg20988073	-3.46899
cg20996682	-1.46443
cg21000936	-2.90356
cg21039932	-1.03577
cg21041372	0.0797041
cg21085007	5.67693
cg21095229	-0.168482
cg21102950	-0.9989
cg21116314	-3.77096
cg21159778	-5.55909
cg21163415	-5.17762
cg21200841	-3.29266
cg21211271	2.63345
cg21215899	-1.4789
cg21233517	-2.0099
cg21241850	0.793144
cg21269164	3.65824
cg21273027	-1.22999
cg21280719	-1.85336
cg21280805	3.31948
cg21312827	-0.204905
cg21364111	-0.631718
cg21368143	-2.13937
cg21387604	-3.95318
cg21401263	-1.04345
cg21404028	-1.54467
cg21427956	-1.98507
cg21437521	-2.19902
cg21452411	-2.80712
cg21474955	-3.15017
cg21482489	-0.462187
cg21486694	0.0530318
cg21534578	1.2857
cg21536042	-3.87587
cg21563078	-0.37425
cg21571466	-2.49544
cg21573538	-1.83621
cg21583111	-4.41769
cg21594567	-2.48932
cg21601837	-0.650033
cg21618333	1.98515
cg21646955	-3.4187
cg21656748	-4.86184
cg21661549	-3.37535
cg21670840	-1.23531
cg21678760	-2.711
cg21730366	-4.22259
cg21732915	-0.0507448
cg21754400	-2.04379
cg21766808	-0.628173
cg21784917	0.749398
cg21787727	-1.28322
cg21791967	-0.63173
cg21838773	-1.44428
cg21868992	-1.78615
cg21877774	-3.74269
cg21877930	-2.75137
cg21911579	-0.608905
cg21935083	-2.85225
cg21937867	2.57119
cg21948465	-0.377033
cg21956337	-1.21029
cg21994174	-3.70379
cg21995919	0.0800493
cg21996072	-1.49341
cg22002216	0.645966
cg22012530	-2.74128
cg22024508	-0.108559
cg22053904	-1.81283
cg22111239	-1.83306
cg22123255	-6.87114
cg22136317	-1.95645
cg22139555	-1.02497
cg22152253	6.3842
cg22170223	-0.297143
cg22209751	-4.11299
cg22269913	4.8171
cg22276332	2.30247
cg22310279	-1.16264
cg22321892	-3.42023
cg22355352	-3.12634
cg22363008	-1.65356
cg22380472	-2.30247
cg22396980	-2.75548
cg22407458	-1.0023
cg22409276	-6.41956
cg22409558	-0.798874
cg22410026	-1.60424
cg22427475	-6.09565
cg22434185	1.49118
cg22453744	-5.70917
cg22475353	4.72668
cg22489754	-2.01713
cg22534617	-0.295908
cg22541679	0.517108
cg22577136	-2.62501
cg22589360	-0.755597
cg22626041	-0.568524
cg22642229	-1.43878
cg22643435	-0.619649
cg22647407	-4.21078
cg22648811	-5.32411
cg22666115	-5.09031
cg22673432	-4.50361
cg22698489	-2.46914
cg22699500	-3.10695
cg22738586	1.70904
cg22750483	-0.860931
cg22755968	-2.40732
cg22764845	-1.99015
cg22765426	-2.71946
cg22822647	-0.246123
cg22836153	-2.22615
cg22841716	-0.972971
cg22850864	-5.6489
cg22879676	-1.15029
cg22984616	-2.18249
cg23007705	-2.14721
cg23017542	-0.758867
cg23032612	-3.95555
cg23055081	-0.25067
cg23076016	-2.97565
cg23080354	-3.75173
cg23090207	-1.42281
cg23093754	-0.408891
cg23119604	-3.21021
cg23124790	-4.6962
cg23164681	-1.42419
cg23251603	-0.629953
cg23274561	-4.46563
cg23281729	-1.46349
cg23312397	-3.83451
cg23316360	-2.28767
cg23327164	-1.5371
cg23352712	-3.91751
cg23363014	-3.10122
cg23365482	-4.14455
cg23374700	-2.0229
cg23376771	-4.59248
cg23424268	-0.687354
cg23427348	-1.71939
cg23462257	-4.19765
cg23471617	-2.22126
cg23478302	-2.94426
cg23486067	4.06589
cg23489671	-3.22593
cg23494140	-0.289849
cg23529740	-0.0986727
cg23539688	-4.01082
cg23581656	-0.524195
cg23599104	-3.75874
cg23614791	-1.40068
cg23619431	1.9096
cg23674344	-4.15523
cg23679198	-1.96696
cg23686403	-3.66449
cg23691220	-0.464125
cg23693021	-1.55093
cg23696834	-1.34789
cg23710795	-0.487743
cg23721712	-2.55369
cg23725321	-0.289778
cg23737062	-3.83603
cg23793364	-4.33115
cg23824815	-4.25968
cg23828595	-2.87491
cg23831021	-1.57991
cg23846145	-0.651162
cg23881204	0.406583
cg23889054	-1.58974
cg23912454	4.2821
cg23913350	-1.00623
cg23916845	-1.14777
cg23922708	-4.33086
cg24010952	-0.767289
cg24021956	-0.984299
cg24039631	-3.27101
cg24049348	-4.90254
cg24077501	-1.94227
cg24085207	-3.37884
cg24085655	6.03647
cg24101359	-2.14134
cg24102360	-4.17135
cg24116974	-2.51994
cg24119079	-4.05749
cg24129914	-3.2708
cg24153763	-2.04781
cg24178500	-1.49298
cg24236409	-0.699726
cg24243375	-1.0813
cg24244118	-0.872252
cg24315046	0.313796
cg24367016	-0.956027
cg24373308	-1.97153
cg24391460	1.07749
cg24393699	-2.35757
cg24420205	-3.9031
cg24455158	-1.9712
cg24457521	-2.45998
cg24461171	0.567797
cg24467927	-2.31226
cg24482053	-2.22523
cg24484339	-1.26132
cg24488810	-3.86405
cg24504999	-1.42589
cg24508611	2.50644
cg24518794	-0.961921
cg24543970	-4.8221
cg24557189	-3.89706
cg24607140	5.77395
cg24623244	-0.512357
cg24646561	4.63101
cg24663255	-2.43972
cg24667625	-3.59256
cg24668990	-1.04579
cg24669247	-4.57021
cg24692861	-2.18372
cg24711649	-3.38372
cg24719107	-0.66494
cg24725642	-0.0297662
cg24728479	-1.55869
cg24733179	-1.34514
cg24745738	-2.49008
cg24751129	1.77228
cg24763568	-1.8727
cg24785726	-2.10315
cg24842967	-2.15476
cg24867142	3.59295
cg24870568	-1.22851
cg24874638	-0.104724
cg24880057	-3.15623
cg24902139	-0.307778
cg24913324	-2.47195
cg24926711	0.538993
cg24942919	-3.66596
cg24974130	-1.05233
cg24980174	-0.666417
cg24982848	-4.3647
cg24990978	-0.0698284
cg25024074	-0.745836
cg25091837	-1.52437
cg25104488	6.096
cg25113009	-2.79833
cg25166322	-0.658847
cg25216196	-2.74143
cg25219173	2.98778
cg25249394	-2.69913
cg25267765	-2.16973
cg25299750	-1.93716
cg25308173	-5.15057
cg25310250	-4.54967
cg25327452	-1.75665
cg25358039	-1.23547
cg25359645	4.06166
cg25421540	-4.60907
cg25426584	-1.6967
cg25454928	-4.75548
cg25561581	-3.9403
cg25586087	0.267219
cg25593726	-2.92223
cg25600136	-2.5984
cg25619184	-4.53972
cg25634004	-0.917247
cg25643819	-1.92558
cg25645178	5.09682
cg25651562	1.7449
cg25652029	-2.86095
cg25666879	-3.40722
cg25671484	-1.33506
cg25678929	-1.94527
cg25717994	-2.02922
cg25751158	-1.97628
cg25766763	-3.14833
cg25803316	-1.53421
cg25823002	3.26875
cg25823142	-2.58606
cg25832175	-1.63122
cg25845747	-2.3583
cg25851842	-3.52466
cg25853777	-1.09331
cg25912517	-3.58118
cg25928190	-0.5988
cg25936889	-0.516108
cg25943096	-2.08553
cg25948154	-1.46734
cg25971727	-1.36846
cg25976257	0.604524
cg25985537	-1.43528
cg26022015	-0.194465
cg26045220	-1.46365
cg26096599	-1.58682
cg26101143	-2.75701
cg26146617	-3.17021
cg26146731	0.175783
cg26161725	-3.42559
cg26217504	-2.3861
cg26218606	0.276699
cg26232187	-1.3443
cg26272220	0.133579
cg26285502	-2.58315
cg26295624	-1.53853
cg26332926	-0.450376
cg26348939	-1.87203
cg26381313	-3.33553
cg26416040	-1.94647
cg26422022	-2.40563
cg26458072	-2.45764
cg26459500	-0.537931
cg26489358	-2.41923
cg26516954	-3.04406
cg26542254	-1.53419
cg26546310	-0.561726
cg26560341	0.00827839
cg26563583	-1.124
cg26578923	-2.77894
cg26582338	-1.84339
cg26601073	1.80061
cg26605406	-4.34081
cg26640895	-2.1302
cg26654728	3.07381
cg26660137	-1.0076
cg26673396	1.24061
cg26686415	-3.95921
cg26695010	0.241433
cg26705561	-2.70138
cg26710743	3.28692
cg26761888	-2.60876
cg26767214	-3.49838
cg26780333	0.120177
cg26812418	-1.4391
cg26812598	3.99021
cg26828593	-1.43352
cg26831148	-2.19575
cg26837479	-0.831773
cg26846590	0.0980864
cg26859016	-2.75559
cg26859900	-0.0535151
cg26892562	-1.49929
cg26893544	-1.40534
cg26927998	-1.98821
cg26937613	-0.364868
cg26954533	-2.65592
cg26993102	2.61781
cg27009208	-5.21932
cg27011480	-1.4923
cg27020253	-2.7564
cg27034819	-1.59355
cg27087753	-2.68583
cg27123423	-1.24881
cg27170159	-1.50484
cg27170458	-0.388981
cg27183551	-4.94625
cg27212978	-1.74623
cg27236825	3.75239
cg27247731	1.118
cg27268184	-6.23861
cg27296330	4.1877
cg27307298	-4.90879
cg27319216	-0.683738
cg27362103	-1.65216
cg27380599	-3.46622
cg27389764	-2.92004
cg27393126	-3.62043
cg27430662	-0.830462
cg27480539	0.600201
cg27531587	-3.03668
cg27533244	-1.50796
cg27537600	-2.32768
cg27544190	-3.53146
cg27610579	-0.882737
cg27620871	0.550308
cg27636165	-3.69242
cg27662483	3.606

## Sheet: 018
probe_id	median_change
cg00005040	0.879733
cg00021108	6.18097
cg00023464	2.56756
cg00024244	2.87512
cg00024396	-2.8335
cg00029648	1.82958
cg00032805	3.32317
cg00089464	0.21423
cg00117463	1.29426
cg00117536	3.0724
cg00137652	0.353435
cg00152095	2.67289
cg00156336	0.882673
cg00158539	-5.10817
cg00160505	3.06829
cg00161556	2.43924
cg00174992	2.15136
cg00175702	-1.70158
cg00182534	4.30719
cg00219151	-2.00396
cg00229423	3.18854
cg00239870	2.99732
cg00243882	-2.24923
cg00246121	0.464593
cg00261781	3.03542
cg00264208	-0.241726
cg00283576	-0.219028
cg00284153	3.75114
cg00288957	0.201125
cg00289546	4.43902
cg00292087	2.98046
cg00292986	5.18319
cg00308439	-0.0763659
cg00332048	-4.43415
cg00346247	3.18157
cg00365524	-2.16147
cg00369024	0.176158
cg00375829	3.87482
cg00383028	-1.30814
cg00388673	-2.88272
cg00400591	-1.01183
cg00407866	-2.31806
cg00414835	2.76334
cg00419711	-1.18452
cg00420869	3.34608
cg00424572	3.57071
cg00428601	2.88508
cg00431050	1.24954
cg00431427	-2.44235
cg00436301	3.83376
cg00447574	-1.88943
cg00453349	0.453771
cg00456448	-2.84463
cg00457403	6.6068
cg00462240	-1.32761
cg00462460	4.0767
cg00477021	1.78369
cg00481499	-3.77752
cg00481951	5.19382
cg00494665	2.15435
cg00504705	5.09471
cg00505502	2.94793
cg00510718	-1.79024
cg00521428	1.31384
cg00523450	1.85433
cg00524288	0.79178
cg00539322	1.89807
cg00550080	-1.06736
cg00576121	2.39595
cg00591489	1.10814
cg00596101	-0.2699
cg00603460	0.113341
cg00617867	2.50187
cg00621125	4.00229
cg00630212	0.0644521
cg00651020	0.838061
cg00651523	3.03312
cg00652727	-1.33492
cg00660513	1.18086
cg00666074	-1.58355
cg00672445	-2.14042
cg00686339	-3.31824
cg00693000	1.06747
cg00717207	4.61054
cg00717487	-1.32491
cg00731917	2.79367
cg00733005	0.683844
cg00752628	3.53622
cg00753630	-0.475769
cg00762869	5.20607
cg00772868	5.47941
cg00774100	0.0541958
cg00775539	1.19549
cg00796569	0.788715
cg00808740	3.66933
cg00819619	-0.335237
cg00831233	2.8655
cg00843236	3.50237
cg00849943	3.44276
cg00858855	3.95125
cg00859145	-0.918382
cg00880959	-0.0278212
cg00882725	-0.563734
cg00900735	3.16285
cg00905687	3.89552
cg00908185	2.20695
cg00917251	2.32552
cg00922376	7.34938
cg00925688	1.53231
cg00931828	1.54969
cg00939082	6.01311
cg00939649	0.833497
cg00950650	4.07948
cg00955828	4.31299
cg00957516	3.16914
cg00958451	1.88494
cg00964103	1.76344
cg00975979	2.81027
cg00979348	4.06248
cg00981170	-1.3366
cg00984146	4.62077
cg00988175	-3.524
cg00994804	5.98411
cg01000812	-1.71208
cg01001098	1.72958
cg01027397	3.09694
cg01030624	-0.102185
cg01042202	1.04826
cg01043019	3.58702
cg01046382	2.95603
cg01047432	1.7194
cg01059385	-3.66658
cg01061405	1.42962
cg01074413	-0.531183
cg01075852	-1.20473
cg01079098	1.61749
cg01087880	-1.55912
cg01089060	0.712163
cg01091117	0.895397
cg01092213	3.41731
cg01099876	0.735572
cg01101865	3.3218
cg01105385	-1.62208
cg01108106	4.24692
cg01118599	-3.12117
cg01120902	-1.28633
cg01151966	2.46393
cg01158367	-3.04036
cg01160394	3.09745
cg01164791	-1.29284
cg01168735	2.11641
cg01170240	-1.37471
cg01178188	0.770324
cg01178971	0.296943
cg01185855	-1.1776
cg01188685	5.64217
cg01198391	2.44292
cg01199888	-3.02143
cg01202155	-0.0929697
cg01209315	-0.694708
cg01230325	1.70734
cg01239651	-3.11016
cg01244418	-1.94053
cg01245721	0.439574
cg01268541	-1.99585
cg01270593	3.61951
cg01274625	-3.6026
cg01295084	-2.93263
cg01305186	-1.65155
cg01308151	2.32242
cg01317569	2.08237
cg01323792	2.17051
cg01327530	-2.57456
cg01329949	6.40482
cg01337293	7.2736
cg01341760	-1.35117
cg01357713	-1.91094
cg01370122	-2.36915
cg01372071	-1.28752
cg01378667	-0.809533
cg01401376	3.72622
cg01406267	6.93454
cg01413097	-1.62096
cg01414358	3.96395
cg01421963	-2.60559
cg01449141	1.86927
cg01449218	2.44773
cg01449266	-1.90039
cg01452873	1.31535
cg01459854	0.657832
cg01460227	4.84176
cg01466446	-0.955772
cg01468656	3.56802
cg01470457	1.65558
cg01479818	3.86175
cg01510198	1.83702
cg01511379	-0.23794
cg01522826	1.69732
cg01527159	-1.01609
cg01548882	3.25245
cg01556227	3.67453
cg01562385	2.16657
cg01566500	2.20756
cg01603146	5.94808
cg01603862	-3.39023
cg01609559	3.05304
cg01613638	2.47034
cg01614643	-1.11205
cg01620570	2.08267
cg01645753	2.6092
cg01654627	0.708819
cg01677302	-1.0905
cg01679081	1.63368
cg01719793	5.09103
cg01725383	5.0052
cg01776373	-0.445899
cg01779765	3.43079
cg01791607	0.521917
cg01794867	0.658645
cg01802258	5.68606
cg01805282	2.21183
cg01813649	5.29112
cg01816014	1.14864
cg01817996	2.4801
cg01849514	-0.0632795
cg01849970	2.20031
cg01856509	-2.27424
cg01865606	-2.16292
cg01866038	1.03519
cg01878705	2.96489
cg01883408	3.39427
cg01884715	0.82951
cg01893041	-1.68206
cg01893097	2.04953
cg01897756	4.59268
cg01907106	0.283926
cg01910494	-0.966276
cg01911239	0.928145
cg01917416	-0.132884
cg01935492	1.26564
cg01939704	1.15024
cg01946574	3.0091
cg01952088	4.16521
cg01961447	6.82326
cg01961965	-2.14017
cg01962911	2.75095
cg01971483	6.36422
cg01984858	5.21312
cg01995099	0.665664
cg02006203	2.83228
cg02018902	3.48427
cg02019865	-2.53452
cg02022481	1.27233
cg02022808	-0.171818
cg02026948	5.65309
cg02029441	2.80377
cg02033116	-1.84206
cg02048412	2.62422
cg02053054	3.02071
cg02057391	2.43775
cg02060584	-3.9775
cg02064636	-3.3618
cg02066409	7.18674
cg02079985	-0.38002
cg02095605	1.09439
cg02102684	0.619383
cg02103450	4.45796
cg02110182	-0.790438
cg02111786	-1.59452
cg02130040	2.20082
cg02145543	-3.27989
cg02159527	-1.68297
cg02164046	4.26972
cg02169734	2.40246
cg02170071	-3.0735
cg02177289	4.88907
cg02181639	0.275938
cg02182308	0.708994
cg02193032	-2.4993
cg02196220	3.55375
cg02206373	1.55378
cg02222844	3.5472
cg02225085	-1.75729
cg02226697	4.38671
cg02229288	3.17695
cg02229775	2.27307
cg02232531	-2.84987
cg02238388	5.49144
cg02240446	0.660522
cg02241481	-0.0387453
cg02242705	5.94035
cg02243437	-0.0633264
cg02248037	5.15515
cg02259479	-2.97029
cg02279138	1.49846
cg02289040	-1.20053
cg02292206	-2.21327
cg02298360	3.55876
cg02318163	2.12491
cg02320003	0.852588
cg02326566	2.38688
cg02330214	1.39707
cg02334669	-0.781975
cg02343439	2.8702
cg02344891	-1.6454
cg02344911	2.05418
cg02346342	2.54286
cg02348449	-0.432854
cg02367930	6.62105
cg02383130	2.49423
cg02385167	2.29256
cg02387744	1.05052
cg02394512	4.82339
cg02399030	0.0973096
cg02400572	0.48183
cg02412314	-2.29645
cg02420010	0.367312
cg02420850	0.879999
cg02434059	1.69671
cg02441647	3.51404
cg02442509	3.52139
cg02462195	1.93953
cg02467765	4.3083
cg02478448	2.83534
cg02484111	3.99737
cg02493486	-0.50524
cg02494368	-0.0226492
cg02521643	1.17078
cg02524808	-2.43013
cg02540036	1.88564
cg02543402	-0.0610724
cg02546590	-0.866796
cg02551347	-0.943089
cg02553489	3.23461
cg02560085	-0.476861
cg02561726	-5.20926
cg02563971	3.51443
cg02564733	2.26557
cg02567694	0.252634
cg02579509	1.79307
cg02605173	2.713
cg02627887	-0.717991
cg02631684	-2.30674
cg02632490	-2.92176
cg02635869	1.89149
cg02641560	-1.10228
cg02668764	-2.8247
cg02671019	-0.0624165
cg02672301	-2.13338
cg02674280	2.04112
cg02676380	2.294
cg02687417	3.25668
cg02703728	3.75505
cg02725885	3.09324
cg02729011	-0.827125
cg02732804	-0.0389266
cg02734472	-1.19639
cg02735486	-4.31367
cg02740572	-4.44757
cg02741554	2.38473
cg02755111	2.76818
cg02772103	-1.4106
cg02791580	-4.18786
cg02792792	4.88572
cg02800810	4.50347
cg02813243	-1.94422
cg02818811	4.71491
cg02858118	4.44221
cg02862059	-1.68682
cg02869559	1.61235
cg02879662	0.26523
cg02881570	3.80341
cg02883621	0.344936
cg02884021	-1.22991
cg02891646	5.63083
cg02892239	3.62269
cg02898994	-2.62295
cg02902366	-1.96656
cg02906047	0.946393
cg02916470	7.57906
cg02919997	2.74103
cg02921003	-0.325891
cg02929073	1.67131
cg02930518	-0.862369
cg02931159	6.34214
cg02935627	-0.126983
cg02938690	-2.12496
cg02940536	-0.776929
cg02941431	-2.65678
cg02968854	-2.65047
cg02971654	1.78783
cg02974931	3.88015
cg02979224	3.12301
cg02983495	3.51603
cg02990869	4.73224
cg02994588	3.9788
cg02994956	5.66574
cg03004273	3.94195
cg03004599	2.30843
cg03013329	1.60429
cg03017480	7.12479
cg03030717	5.75861
cg03037150	2.12052
cg03052970	2.24094
cg03077077	3.38215
cg03078767	1.46878
cg03094675	-0.835148
cg03096151	1.30687
cg03098937	1.5038
cg03106313	0.871039
cg03109101	2.74967
cg03133876	1.22739
cg03143886	1.74631
cg03145999	4.54433
cg03155027	2.90426
cg03158570	0.158767
cg03169021	1.83894
cg03171465	2.33082
cg03178678	4.2029
cg03202077	4.24593
cg03214297	4.34531
cg03235479	-3.36303
cg03236725	4.26651
cg03239914	-3.02983
cg03251918	2.89321
cg03256955	2.70642
cg03267730	-1.54681
cg03277051	1.83031
cg03320773	3.90833
cg03321592	3.91404
cg03325535	2.27288
cg03337243	4.38928
cg03339065	3.52141
cg03340215	1.08135
cg03345976	-2.83012
cg03349922	1.458
cg03353436	-0.363939
cg03367519	2.01454
cg03371125	0.382229
cg03374922	0.808768
cg03385441	4.22753
cg03390854	5.89924
cg03394150	6.48836
cg03395993	-0.790786
cg03399905	3.02757
cg03400437	2.68109
cg03401077	2.32717
cg03404662	2.44948
cg03405173	-1.49211
cg03405515	4.4292
cg03411288	5.14653
cg03423446	-0.497035
cg03434847	-0.590472
cg03438535	0.301343
cg03438558	-2.28972
cg03441409	2.42876
cg03444838	0.418363
cg03460049	0.23228
cg03462168	2.4407
cg03476195	-2.80187
cg03476357	6.17382
cg03479715	4.73488
cg03481393	2.90157
cg03485262	7.75737
cg03512499	3.85815
cg03521736	1.13722
cg03532709	-2.22278
cg03537872	-3.18923
cg03541887	-1.26095
cg03546739	-1.60123
cg03554573	1.69572
cg03568717	-0.200104
cg03569645	2.96951
cg03580297	-2.1992
cg03591990	0.109849
cg03596678	3.41924
cg03600259	1.87553
cg03611028	-0.525959
cg03614916	2.58155
cg03616357	4.42403
cg03621279	-1.93554
cg03640766	3.25242
cg03646889	-2.29673
cg03669282	0.0561685
cg03687587	0.608081
cg03688058	1.3436
cg03691573	-2.97506
cg03717570	4.0151
cg03717836	-2.08727
cg03722243	1.6383
cg03724763	1.99952
cg03752138	3.8022
cg03755535	2.48234
cg03758392	4.63286
cg03768174	-1.60965
cg03769055	-0.286389
cg03778155	6.08471
cg03784656	-1.01045
cg03789420	3.89685
cg03797398	0.81978
cg03801179	2.53444
cg03805732	-3.02485
cg03812384	2.91903
cg03817939	5.72932
cg03826981	4.68913
cg03827804	-1.34398
cg03836184	3.41421
cg03851398	0.479068
cg03854198	7.41726
cg03858448	3.84965
cg03869703	-1.80538
cg03869874	1.42079
cg03877364	1.93552
cg03880161	1.21345
cg03880512	0.145179
cg03885399	2.63491
cg03887218	0.296173
cg03921753	4.85589
cg03929205	2.70601
cg03949755	3.87811
cg03951219	5.44476
cg03969182	0.568186
cg03969316	3.22212
cg03975235	2.15892
cg03992611	1.92441
cg03998871	-0.365695
cg03999361	2.06034
cg04000140	3.60179
cg04003309	-1.30041
cg04004830	-1.06154
cg04005341	-1.34769
cg04006554	5.18494
cg04016326	2.72021
cg04019983	4.41272
cg04024799	-1.09945
cg04028604	3.40257
cg04035386	-2.35846
cg04044203	2.28175
cg04049102	1.7578
cg04054015	3.12941
cg04064675	2.50141
cg04065856	1.56071
cg04074140	5.79265
cg04092800	2.01589
cg04094169	0.193658
cg04094641	0.431275
cg04100007	-1.37327
cg04102734	-3.36622
cg04104132	3.2495
cg04107099	1.08306
cg04109918	-1.53533
cg04110544	0.955339
cg04124352	0.52109
cg04126707	3.26069
cg04134279	2.28415
cg04139849	1.75575
cg04140663	3.37092
cg04144938	0.582863
cg04153464	-1.02206
cg04162032	-1.61543
cg04176360	-2.72531
cg04181107	0.157936
cg04182997	-0.510141
cg04184836	4.25612
cg04202120	0.618752
cg04204548	0.488506
cg04219173	-3.14053
cg04219321	1.26715
cg04230060	2.70942
cg04237003	3.44629
cg04239375	4.5335
cg04266915	-0.582869
cg04272011	5.51141
cg04276723	2.82078
cg04281219	2.04511
cg04286377	0.235781
cg04297105	3.19159
cg04299757	1.35068
cg04304561	3.60598
cg04311880	-2.66287
cg04316938	-1.39022
cg04324727	-0.249223
cg04331072	2.14062
cg04350922	1.98115
cg04353853	0.45725
cg04357830	8.02967
cg04358027	-1.69804
cg04360049	4.19061
cg04366385	0.243943
cg04389426	3.64393
cg04394691	3.33746
cg04405075	-2.84308
cg04446613	-1.60926
cg04461782	0.303674
cg04484789	-2.04675
cg04485956	-4.02541
cg04487205	3.41588
cg04504006	4.60239
cg04504751	-0.867781
cg04513227	-3.98442
cg04529066	4.06933
cg04532229	2.4783
cg04539203	1.54598
cg04539957	2.30398
cg04547220	-2.11867
cg04548563	4.6523
cg04548627	4.26439
cg04556542	1.90142
cg04577177	0.577932
cg04591034	1.91923
cg04595983	0.590393
cg04599631	3.81346
cg04600299	-0.380817
cg04615411	4.30818
cg04615512	3.92854
cg04618607	2.13959
cg04629194	10.2842
cg04634417	-1.02501
cg04638468	1.64659
cg04654543	-2.90211
cg04657224	6.1522
cg04662369	3.15791
cg04664126	3.84095
cg04671541	-3.65321
cg04673937	4.81362
cg04676799	0.74035
cg04677163	3.35816
cg04681810	2.66288
cg04687241	-2.69275
cg04696274	0.820262
cg04699566	-1.43629
cg04705402	3.61344
cg04709035	1.13242
cg04712949	1.21446
cg04717802	-4.85012
cg04727116	4.26408
cg04731710	3.37974
cg04731813	1.42894
cg04733989	-1.67214
cg04743945	2.66746
cg04754315	-2.3814
cg04773864	1.17389
cg04775315	11.9
cg04787024	7.36815
cg04790357	1.5637
cg04791678	1.6611
cg04801402	2.07367
cg04803226	-0.0361469
cg04823698	-0.361641
cg04824304	1.52659
cg04846036	7.0889
cg04850999	2.8962
cg04854089	-2.34122
cg04856292	1.48102
cg04865491	2.62499
cg04877901	5.70858
cg04881058	0.106371
cg04898316	0.943773
cg04902871	3.24463
cg04904654	-0.986929
cg04906950	0.422466
cg04917197	3.06014
cg04920683	4.245
cg04921109	1.51259
cg04974584	2.02983
cg04975481	-1.49217
cg04982748	1.66228
cg05006071	1.4691
cg05006728	-1.29846
cg05007697	-1.78009
cg05014481	-2.8973
cg05022306	2.47321
cg05044185	3.70557
cg05074644	5.75907
cg05081760	2.85564
cg05083839	-3.84064
cg05093836	2.74307
cg05104639	-0.94357
cg05107363	-0.929509
cg05119316	2.9161
cg05121480	6.03244
cg05134939	-3.22518
cg05136848	-2.50456
cg05137358	4.34346
cg05137838	2.09426
cg05141574	4.53664
cg05142982	5.9893
cg05153057	-2.14371
cg05161602	-1.2812
cg05173737	3.35555
cg05177637	2.09018
cg05186666	2.98736
cg05197062	7.47597
cg05200540	-0.312423
cg05214390	-3.89023
cg05226967	0.309838
cg05234568	-0.387101
cg05251676	5.2348
cg05254257	2.08501
cg05280527	-3.34317
cg05283542	3.09471
cg05284750	0.935633
cg05286653	2.2219
cg05296434	7.38123
cg05296818	1.78999
cg05302416	0.324624
cg05306040	4.76244
cg05332306	4.40687
cg05338433	3.71384
cg05339695	-0.13476
cg05343073	1.83653
cg05344021	3.45085
cg05344941	-0.9897
cg05346841	6.00992
cg05351786	5.96877
cg05354018	4.46076
cg05373256	3.45236
cg05380008	-2.25461
cg05384712	1.19734
cg05391011	0.527454
cg05396987	4.51849
cg05399360	2.68427
cg05410790	0.0579348
cg05412031	-0.410223
cg05422957	0.610062
cg05455971	-1.863
cg05456948	1.7678
cg05462426	0.425232
cg05468833	2.24534
cg05492839	6.93983
cg05496768	3.58195
cg05503968	3.21899
cg05517686	2.39489
cg05527113	2.89773
cg05539217	0.275078
cg05542661	1.3435
cg05546878	-0.276243
cg05551114	1.53716
cg05563388	2.65876
cg05587282	1.88525
cg05596294	-2.1355
cg05599883	1.09098
cg05600654	2.03324
cg05602356	3.75519
cg05608159	-1.2853
cg05616010	3.08556
cg05619888	2.86003
cg05628394	0.593106
cg05640063	5.46454
cg05643303	1.15429
cg05651511	2.51617
cg05653707	3.5243
cg05687686	3.69064
cg05706117	5.63349
cg05707704	2.6475
cg05732749	-1.69527
cg05760393	3.04538
cg05761277	2.0137
cg05777400	0.15555
cg05790550	1.88454
cg05792368	0.879262
cg05801578	0.364457
cg05807991	6.35307
cg05824990	-1.23184
cg05825420	4.9505
cg05837253	0.13654
cg05861880	-1.87026
cg05865548	-2.63925
cg05868911	0.891963
cg05871614	3.5846
cg05874166	-0.295243
cg05876738	3.98385
cg05879498	3.1922
cg05881566	0.516964
cg05886201	-1.25723
cg05916662	1.44229
cg05918124	-1.93397
cg05934908	1.4123
cg05950195	1.83951
cg05963618	5.82925
cg05968345	-3.44005
cg05971966	5.34097
cg05974816	-0.776579
cg05984845	-2.4351
cg05991331	2.9529
cg05993512	1.36124
cg05997641	5.48808
cg06000963	2.56677
cg06013215	4.76276
cg06033660	-1.61169
cg06050385	5.42992
cg06060191	-2.15801
cg06062084	0.290164
cg06070749	2.34677
cg06097727	1.48146
cg06098164	-2.19711
cg06116412	3.65694
cg06124834	-3.58532
cg06130949	3.35461
cg06137032	1.4723
cg06151184	-1.06909
cg06155077	1.05573
cg06156847	-1.81214
cg06175447	-0.332922
cg06192555	2.86415
cg06205541	1.3275
cg06226256	3.35778
cg06275813	5.15942
cg06288788	2.39452
cg06291484	6.12062
cg06294392	3.50197
cg06296503	4.9205
cg06306117	-1.79073
cg06313881	-1.91309
cg06320606	0.1759
cg06322432	0.547453
cg06327150	2.92156
cg06332111	4.62004
cg06335814	1.80305
cg06358862	2.79332
cg06364159	0.983037
cg06365898	3.06879
cg06366009	2.45271
cg06370795	-0.376292
cg06373764	-1.96256
cg06380356	4.04962
cg06385459	3.43633
cg06392318	6.10901
cg06393563	1.51444
cg06409105	0.927324
cg06432479	1.85757
cg06442489	-3.53423
cg06456531	-2.58407
cg06464111	2.00954
cg06478481	0.569177
cg06484993	0.854952
cg06489385	1.94064
cg06497668	2.81824
cg06503315	3.93626
cg06519278	4.12133
cg06526388	0.0955651
cg06531250	-0.382595
cg06533200	2.5697
cg06535324	4.27985
cg06542614	2.11761
cg06575035	1.42845
cg06580908	-1.44832
cg06583108	1.37851
cg06591822	2.96852
cg06596075	0.366022
cg06617886	0.165828
cg06643013	3.20858
cg06644403	0.327953
cg06653961	-0.579743
cg06655225	2.06766
cg06659614	-0.590322
cg06679185	-1.51056
cg06685724	-1.87506
cg06695611	1.9841
cg06696800	3.98607
cg06699286	-0.268332
cg06716568	2.21483
cg06718763	2.26069
cg06734816	4.47957
cg06742440	-1.72374
cg06758350	5.09955
cg06760305	1.59613
cg06764333	0.470999
cg06767701	2.30767
cg06768177	2.27886
cg06778202	-0.123716
cg06781532	3.69375
cg06786773	3.22743
cg06802346	-1.58283
cg06802812	3.70547
cg06814856	5.08575
cg06818710	3.30705
cg06819296	-3.67444
cg06842519	3.33769
cg06850467	4.61187
cg06877413	-0.1797
cg06891538	-1.92052
cg06910925	3.43784
cg06913349	-3.26084
cg06928315	0.801222
cg06934092	-1.3886
cg06934988	0.383352
cg06943385	1.74533
cg06950309	-3.10028
cg06961439	-1.72774
cg06971773	1.55952
cg06972911	4.0212
cg06978117	2.69683
cg06978273	4.83033
cg06978680	2.40683
cg06979393	3.13428
cg06980251	4.35947
cg06997800	5.11401
cg07001909	-1.19622
cg07007050	-1.50923
cg07007778	0.241287
cg07011172	6.79929
cg07014126	-2.84706
cg07017063	2.01705
cg07017901	4.04509
cg07018580	-5.76466
cg07022880	2.47254
cg07023791	5.05637
cg07034660	2.07025
cg07037002	1.97751
cg07038423	0.620194
cg07044414	1.88313
cg07047373	3.41392
cg07066420	3.14061
cg07078789	2.86962
cg07083785	5.77049
cg07087686	1.04131
cg07109490	-1.32219
cg07116160	0.328424
cg07127259	-0.278028
cg07131655	3.65015
cg07134608	-2.23468
cg07140808	3.99854
cg07142893	3.43591
cg07152591	3.22166
cg07160277	4.23288
cg07160574	2.53703
cg07175507	2.54947
cg07191594	3.69866
cg07200957	3.29883
cg07204747	2.54926
cg07210669	-1.6878
cg07223534	-0.996377
cg07224169	-0.81908
cg07225362	-1.83954
cg07231787	1.21071
cg07234028	4.33676
cg07235075	1.62101
cg07237214	2.58992
cg07240554	7.11185
cg07243103	-1.87073
cg07250596	4.5231
cg07251197	4.5992
cg07251911	3.27987
cg07276415	-2.26232
cg07279933	3.25613
cg07285995	-1.16313
cg07302394	1.13169
cg07306881	0.0636258
cg07308161	2.33645
cg07314067	0.992517
cg07316730	2.23205
cg07321500	2.21976
cg07344492	1.98229
cg07355278	-1.57481
cg07358444	5.35237
cg07370646	1.94475
cg07376134	-2.16644
cg07380678	3.20384
cg07386898	-0.293755
cg07416383	6.40412
cg07416664	1.27069
cg07423345	2.06987
cg07434260	1.83387
cg07442568	2.14462
cg07469063	0.313246
cg07471209	6.93155
cg07477034	1.65912
cg07486017	0.903491
cg07488576	-3.01639
cg07492770	2.41703
cg07497511	3.11444
cg07499072	3.96103
cg07511671	4.17799
cg07520649	-0.236028
cg07538039	1.6738
cg07570075	1.10538
cg07571041	-0.057486
cg07572949	-0.132307
cg07589691	0.1638
cg07596209	2.15749
cg07614389	-1.67125
cg07628705	1.6725
cg07628813	-3.23391
cg07644368	5.36755
cg07649562	2.7689
cg07669002	-0.221831
cg07684809	1.90553
cg07692970	1.41087
cg07716486	6.55302
cg07718690	3.83491
cg07724816	6.10547
cg07749071	2.36614
cg07765621	3.74976
cg07769790	4.40216
cg07791427	1.99762
cg07799043	3.69452
cg07800665	-2.1803
cg07805699	0.238924
cg07816366	3.1967
cg07821629	3.64809
cg07828302	7.57647
cg07833019	0.184675
cg07836142	3.07336
cg07837556	5.57076
cg07837764	2.84677
cg07838603	3.32595
cg07879739	4.74122
cg07882171	3.78734
cg07895186	0.677652
cg07899729	4.57631
cg07900766	-1.98216
cg07903918	3.2399
cg07909380	-2.98301
cg07915162	2.55253
cg07918634	0.361562
cg07921712	-3.24839
cg07926691	3.41727
cg07933092	2.80457
cg07942598	1.21637
cg07961283	4.62857
cg07961479	0.128425
cg07965640	-1.9346
cg07969984	3.67367
cg07971863	0.591819
cg07976262	0.297497
cg07978472	5.89877
cg07987890	2.08286
cg07996027	-5.88552
cg08009669	-1.18315
cg08015755	5.14404
cg08017326	1.02807
cg08017606	1.06209
cg08026651	-1.89733
cg08067695	1.80041
cg08072539	2.86151
cg08080898	0.738107
cg08081524	0.605514
cg08096010	1.91424
cg08103199	4.48025
cg08110610	1.86731
cg08115556	0.812968
cg08125181	2.07299
cg08131352	1.1842
cg08134518	-1.13681
cg08145625	1.18346
cg08146609	-1.57952
cg08148553	4.34976
cg08164556	-0.0734865
cg08173515	-1.53485
cg08188471	-1.83565
cg08190291	5.47443
cg08198187	-1.48258
cg08199544	-0.317175
cg08207707	0.250306
cg08210896	4.53075
cg08217227	0.646765
cg08221811	2.91756
cg08228208	5.25781
cg08285151	-5.34978
cg08291430	2.84979
cg08309706	1.0298
cg08322034	4.3381
cg08334310	5.31884
cg08368617	3.53917
cg08378929	-0.396199
cg08404227	4.60129
cg08413060	4.53198
cg08419026	1.89542
cg08431931	-3.84501
cg08436313	3.2966
cg08455778	-4.34367
cg08481464	1.7681
cg08488089	-1.44322
cg08496276	4.04276
cg08502797	-0.304417
cg08513075	-2.65603
cg08513665	2.39507
cg08516516	5.07595
cg08526637	4.39937
cg08533401	0.607054
cg08541345	3.0234
cg08553437	3.31045
cg08553816	3.98652
cg08570199	-2.6251
cg08576184	1.8252
cg08592530	5.80271
cg08609249	-0.453629
cg08613370	-2.55441
cg08625556	3.52936
cg08635134	-0.0227581
cg08640901	1.57323
cg08641796	-1.20309
cg08654655	-2.64014
cg08686092	4.34745
cg08688548	-1.63621
cg08690482	6.65323
cg08692023	1.7956
cg08694199	0.805279
cg08707078	-1.09063
cg08718398	3.82708
cg08724517	-0.424788
cg08729318	6.39899
cg08731623	2.13624
cg08742288	5.29289
cg08756778	0.895088
cg08768621	3.2248
cg08769300	4.81092
cg08769451	3.91558
cg08779777	-1.32626
cg08785274	-2.15352
cg08797483	2.41646
cg08804258	3.35872
cg08806263	-1.9145
cg08807135	1.03709
cg08815398	0.608198
cg08832341	2.05361
cg08838671	4.63077
cg08839904	3.44547
cg08854560	1.66164
cg08860790	4.41254
cg08871101	-0.054209
cg08920249	-2.14057
cg08933227	3.89455
cg08935301	1.39074
cg08942192	-2.90482
cg08945395	-1.21398
cg08957484	5.28468
cg08959814	-2.73514
cg08970083	-0.672083
cg09009074	3.10855
cg09012708	3.23935
cg09018824	2.85216
cg09025747	3.05206
cg09038885	4.2677
cg09047553	5.11041
cg09049672	7.11664
cg09067791	-0.00879559
cg09068528	2.66545
cg09074965	-0.314076
cg09077757	3.29794
cg09082940	-1.24406
cg09088257	4.34894
cg09091690	3.35789
cg09092093	2.22569
cg09101894	-1.23874
cg09104050	-0.829999
cg09106154	1.70289
cg09107432	-3.85421
cg09121623	-1.21058
cg09122370	0.421082
cg09124703	3.63709
cg09130288	2.22551
cg09144424	4.72807
cg09190280	3.16175
cg09218354	2.56811
cg09236163	1.89569
cg09236434	4.60793
cg09260207	2.67786
cg09276451	1.6432
cg09277543	-0.113852
cg09279240	3.01298
cg09285543	-1.08671
cg09303549	-4.16509
cg09306340	-1.82442
cg09308336	2.58663
cg09314708	1.70551
cg09320971	7.38438
cg09321363	-4.17876
cg09321717	1.90087
cg09331011	5.10727
cg09336947	0.538355
cg09338297	-2.66129
cg09369381	3.98628
cg09373034	4.15463
cg09397359	-0.361181
cg09398200	-0.731756
cg09400284	9.44153
cg09412715	5.0315
cg09426810	0.342163
cg09450020	1.05166
cg09454560	0.531704
cg09469432	-1.54339
cg09476891	2.93381
cg09479286	2.62879
cg09494357	5.23398
cg09515205	2.64099
cg09523171	4.43066
cg09528825	5.13686
cg09531225	4.62887
cg09531592	-3.536
cg09532691	-3.74617
cg09551776	2.75074
cg09555367	1.15876
cg09560399	4.39324
cg09567915	1.36978
cg09588792	3.47641
cg09591190	-0.195792
cg09593286	2.38676
cg09604110	6.84919
cg09616160	2.73062
cg09632303	-1.5748
cg09642498	3.8618
cg09645126	4.10834
cg09653424	-1.59351
cg09661940	3.6799
cg09667013	-2.88618
cg09668216	4.19195
cg09674175	1.85885
cg09690326	-2.01629
cg09693388	1.95868
cg09697651	5.34293
cg09727046	5.93733
cg09736426	2.33146
cg09737265	2.73385
cg09738592	5.64268
cg09747891	-2.03056
cg09758742	7.29368
cg09764408	4.54808
cg09764980	0.302474
cg09765994	3.26718
cg09789590	1.0159
cg09808211	-3.75894
cg09826587	2.73687
cg09828714	-1.34317
cg09840840	3.59091
cg09842479	3.09093
cg09853371	-2.00064
cg09874107	2.15817
cg09876101	-1.13926
cg09878473	3.44874
cg09884635	4.25128
cg09885380	3.021
cg09889857	7.79687
cg09892203	3.36477
cg09904383	5.28073
cg09908879	3.25141
cg09917807	-1.87116
cg09923032	0.326042
cg09929819	0.708777
cg09930496	3.25802
cg09939247	-0.746184
cg09941833	-1.46114
cg09950309	0.0618705
cg09962807	3.82914
cg09979256	5.04216
cg09990446	2.52206
cg10012711	-1.73143
cg10021349	1.42075
cg10023838	2.45981
cg10031532	2.29975
cg10034884	0.851959
cg10043085	-1.88139
cg10053169	-3.32272
cg10059056	-2.19435
cg10065823	4.20543
cg10069121	2.12255
cg10092652	0.730828
cg10097464	0.748648
cg10108237	-0.369778
cg10113212	-0.176962
cg10113373	2.74667
cg10116624	-0.42774
cg10127275	4.31027
cg10127483	1.63104
cg10146203	2.07963
cg10155681	2.17792
cg10158541	0.923769
cg10165331	0.309224
cg10179911	2.60206
cg10186400	3.02937
cg10188823	3.58755
cg10195967	2.40217
cg10217183	-2.04719
cg10221501	1.5682
cg10222038	2.38682
cg10227327	3.08941
cg10235863	-1.21606
cg10243755	2.97788
cg10248552	1.55918
cg10249997	2.83466
cg10262037	1.24645
cg10270238	-1.33428
cg10271935	3.5466
cg10277927	7.48906
cg10293925	3.6704
cg10318222	0.81282
cg10322560	-1.05851
cg10334703	2.14205
cg10335747	-0.349888
cg10335912	1.99197
cg10343060	3.86117
cg10346782	2.14602
cg10354549	3.00122
cg10355837	1.89004
cg10369451	-1.10438
cg10376476	0.236682
cg10380348	2.40168
cg10380643	-2.24556
cg10385089	1.38628
cg10385379	1.09958
cg10394610	0.814011
cg10394898	0.368962
cg10401879	5.27686
cg10402995	-0.765868
cg10404148	1.41256
cg10406653	4.22501
cg10410213	-1.79026
cg10449882	5.16021
cg10450421	-3.1355
cg10452410	-2.21473
cg10453719	3.1862
cg10458429	1.92926
cg10469553	0.463245
cg10470588	5.72317
cg10471437	4.91459
cg10492559	4.61974
cg10499543	-2.14586
cg10503202	-1.78891
cg10503867	3.91678
cg10510119	3.83733
cg10511866	3.72469
cg10532246	0.961579
cg10534544	3.50941
cg10536901	0.0375662
cg10544564	0.679495
cg10594583	2.64052
cg10600883	2.31681
cg10603233	5.13099
cg10642838	0.548756
cg10644176	2.71129
cg10645483	-2.72335
cg10652393	6.45443
cg10658779	0.569609
cg10659886	2.66813
cg10672343	-1.56653
cg10673431	-0.0293235
cg10678459	-0.267627
cg10685531	-1.57466
cg10695356	0.470704
cg10715529	-1.79551
cg10727962	5.99123
cg10729312	-1.60881
cg10730712	5.41806
cg10741760	2.26054
cg10771090	3.19151
cg10778862	5.39202
cg10779656	1.57445
cg10784143	-2.95219
cg10810752	3.80494
cg10816169	1.99391
cg10824802	3.28688
cg10836887	0.409318
cg10838380	3.28172
cg10839385	2.38862
cg10845249	-1.96856
cg10847656	2.05898
cg10863741	3.77751
cg10866755	1.6832
cg10871044	-0.784056
cg10875257	3.69021
cg10876928	0.24907
cg10890233	2.47595
cg10902206	-0.604546
cg10912360	-3.55429
cg10925433	2.77745
cg10929210	-4.36758
cg10939691	1.04834
cg10943359	4.97659
cg10946435	-2.21221
cg10947146	5.92756
cg10963518	-0.115488
cg10983146	2.44617
cg11006995	3.94181
cg11025829	3.66312
cg11035687	-3.24799
cg11036833	4.51042
cg11051055	4.15668
cg11059944	-1.41886
cg11060910	0.220293
cg11073571	3.59327
cg11079936	-4.07299
cg11081941	-2.00496
cg11104313	-2.46879
cg11112162	5.17402
cg11113760	2.38158
cg11153057	-2.30425
cg11161837	0.584609
cg11162764	0.554881
cg11163975	7.95622
cg11179625	1.09758
cg11188027	5.05299
cg11190155	-0.0259513
cg11208039	2.58829
cg11209624	1.86962
cg11213717	-0.294876
cg11214485	4.20508
cg11218092	4.28795
cg11230716	1.43715
cg11243680	-0.307521
cg11244037	0.327442
cg11247289	0.617984
cg11256387	4.68959
cg11268581	0.33567
cg11290265	1.96388
cg11294692	0.987098
cg11299854	4.9324
cg11321459	-2.50297
cg11327194	2.87605
cg11332026	5.59655
cg11342429	-1.83748
cg11344626	2.63085
cg11362770	5.08635
cg11363972	1.43753
cg11369761	-1.92726
cg11385273	-0.295628
cg11402700	3.41549
cg11407741	2.0843
cg11408333	4.21303
cg11414709	6.55735
cg11417985	1.29581
cg11434468	4.69485
cg11455423	-0.611536
cg11459006	1.64323
cg11474864	2.43528
cg11493126	1.66521
cg11494773	1.88143
cg11497864	1.37466
cg11502103	-5.41123
cg11504495	3.36733
cg11506453	-1.88652
cg11507097	-2.34779
cg11509341	3.92407
cg11509404	4.703
cg11510620	3.48235
cg11520493	-3.40932
cg11521427	-2.72541
cg11539275	4.41963
cg11560404	-0.982587
cg11564339	7.28038
cg11601112	-0.301649
cg11627314	1.92213
cg11639612	-1.4954
cg11661195	2.18587
cg11662264	1.69062
cg11670060	2.81272
cg11677105	5.61143
cg11688376	1.9157
cg11691170	1.61972
cg11691589	1.84107
cg11725768	-1.36485
cg11731257	0.655681
cg11732017	2.61527
cg11734588	-1.01318
cg11734710	2.23964
cg11760748	6.56332
cg11765288	-1.81649
cg11788289	-1.63537
cg11794649	0.738416
cg11803285	3.76534
cg11818853	2.32642
cg11832404	3.156
cg11834909	6.02954
cg11851098	0.49926
cg11854928	-3.55281
cg11895451	4.32749
cg11896507	2.66099
cg11902458	-1.66932
cg11908711	0.636494
cg11911874	2.67699
cg11912543	3.24363
cg11926525	3.17306
cg11928275	3.13901
cg11930768	-1.6487
cg11938014	4.316
cg11940149	5.42556
cg11967480	6.70721
cg11973877	2.63697
cg11982525	-1.30315
cg11986043	5.08607
cg11991058	-0.838148
cg11996434	1.46832
cg12014008	3.05698
cg12032679	2.39193
cg12042587	0.595715
cg12044123	2.57653
cg12046131	0.950762
cg12052258	2.82472
cg12059257	5.75194
cg12071544	3.37692
cg12076664	4.20504
cg12081743	-1.13868
cg12082702	-0.27982
cg12083928	5.11138
cg12087304	1.01166
cg12094174	2.2935
cg12094812	4.39321
cg12108029	1.78755
cg12120126	3.80037
cg12120300	2.31438
cg12138057	-3.62537
cg12146673	4.57874
cg12169365	2.21242
cg12181133	6.64013
cg12181634	-0.148252
cg12242174	-1.69486
cg12251145	-1.40825
cg12251804	1.11394
cg12253819	6.98637
cg12258307	6.47398
cg12267291	0.911096
cg12272837	2.03569
cg12276019	2.41947
cg12290660	1.87367
cg12293132	-1.81298
cg12296326	1.67269
cg12299199	3.38495
cg12317601	4.18465
cg12319423	5.78227
cg12325349	0.637027
cg12332454	1.67784
cg12346504	-0.109276
cg12346592	2.99268
cg12349009	0.694607
cg12373573	1.90537
cg12394334	0.652368
cg12401158	0.0639305
cg12405983	1.30561
cg12416637	2.89451
cg12419067	-1.70603
cg12419522	0.790876
cg12421686	3.19306
cg12427262	3.50385
cg12447069	3.46539
cg12456433	1.3565
cg12465704	2.71636
cg12471227	0.827436
cg12477880	6.86446
cg12478331	-1.59766
cg12484193	-0.880053
cg12486287	1.84769
cg12490910	-1.95991
cg12510028	1.89053
cg12515325	1.87643
cg12518166	1.57392
cg12526300	-0.925362
cg12541591	4.92867
cg12547474	1.71305
cg12552289	1.8688
cg12552293	1.99159
cg12555380	0.583488
cg12560877	0.971096
cg12563240	-2.95656
cg12571423	3.04362
cg12571873	2.26012
cg12583927	0.625881
cg12585806	2.00123
cg12592974	4.93562
cg12601963	-2.30598
cg12615334	-2.49873
cg12623422	2.49768
cg12625824	-1.83189
cg12628659	9.30475
cg12635454	-2.59307
cg12645891	-2.27505
cg12654199	-0.115274
cg12656475	4.78947
cg12665742	1.83403
cg12688248	0.202453
cg12691229	-2.31349
cg12692042	-0.151292
cg12721792	1.67638
cg12737228	2.11497
cg12754273	-2.42675
cg12757181	-0.479883
cg12759298	-0.0181089
cg12769138	-1.14058
cg12779438	-1.59842
cg12780433	3.0329
cg12783491	1.25544
cg12791492	-0.592487
cg12804248	1.09597
cg12806822	0.341944
cg12807946	-2.11761
cg12827708	-3.42239
cg12834070	9.76424
cg12838436	5.92992
cg12839593	2.21113
cg12851429	0.916946
cg12860500	3.38313
cg12863565	-1.09265
cg12866648	6.33162
cg12869623	0.476039
cg12880658	5.54567
cg12894449	1.25926
cg12895810	1.14271
cg12903825	2.78089
cg12907138	3.87126
cg12925933	-3.00029
cg12926720	2.09141
cg12927026	4.6177
cg12927498	5.13859
cg12929487	4.22635
cg12929755	3.32741
cg12941161	2.00327
cg12944197	-0.347952
cg12963850	-2.78055
cg12964741	2.14347
cg12973665	-2.93377
cg12973688	2.39015
cg12990337	-3.7232
cg13015113	-5.61506
cg13022129	1.29161
cg13028930	1.08113
cg13037259	5.50615
cg13039115	5.44574
cg13044806	3.05883
cg13052102	-1.31903
cg13060997	2.2266
cg13090987	6.91674
cg13095704	2.34552
cg13114921	3.64621
cg13141442	1.68244
cg13148449	-3.91296
cg13160888	2.93614
cg13167052	2.62681
cg13171890	4.87502
cg13195526	-3.37505
cg13206017	0.980587
cg13214190	-1.97768
cg13222558	1.7834
cg13227162	-1.5771
cg13233929	2.74868
cg13237033	2.00476
cg13237349	-4.45262
cg13239252	0.471965
cg13249591	2.99975
cg13264741	1.65053
cg13267747	4.38798
cg13285968	-0.528637
cg13297865	6.37457
cg13298827	-0.0997363
cg13299984	-1.78721
cg13307880	1.64898
cg13335112	0.545297
cg13336642	0.796196
cg13347038	0.23541
cg13351830	2.46368
cg13361168	-0.313167
cg13375916	-0.476448
cg13387425	3.00491
cg13400188	0.697088
cg13408776	2.34964
cg13423151	3.97615
cg13426829	2.34757
cg13435652	4.20622
cg13441378	-1.63622
cg13445177	2.46259
cg13447927	2.5818
cg13465838	4.73362
cg13468002	4.78649
cg13486354	4.14136
cg13504215	4.69803
cg13508557	3.87527
cg13521940	2.6403
cg13525197	2.99811
cg13542073	-0.868929
cg13547574	3.38494
cg13549719	2.89984
cg13550921	-1.40131
cg13557631	9.78072
cg13572146	-0.689715
cg13577744	2.25975
cg13579439	0.747745
cg13581847	0.171112
cg13586809	1.47706
cg13588054	3.61852
cg13596049	3.60828
cg13601496	4.24283
cg13616124	4.13034
cg13630694	0.611047
cg13634713	1.29757
cg13636408	-0.267197
cg13640145	3.99752
cg13648312	4.08086
cg13655451	-1.49434
cg13657655	3.06969
cg13673164	0.0943518
cg13699355	6.33631
cg13707395	1.89711
cg13718964	-3.75173
cg13748469	3.90949
cg13773914	2.93223
cg13776340	3.14943
cg13789548	4.0826
cg13792451	2.61287
cg13800763	2.29513
cg13806939	2.00753
cg13819127	1.65265
cg13826167	0.677964
cg13833923	2.08724
cg13851647	0.115188
cg13856584	0.148279
cg13859541	2.63788
cg13862631	-0.41955
cg13865352	-0.686438
cg13869937	4.28978
cg13871354	2.90518
cg13873269	2.78218
cg13888748	-0.180876
cg13889934	-2.60526
cg13890859	-0.706336
cg13891181	2.06913
cg13894081	2.25413
cg13902645	-2.24178
cg13904771	0.746869
cg13920934	-0.130138
cg13927171	-0.523539
cg13930105	6.80686
cg13939978	-1.87553
cg13941669	2.26472
cg13948050	4.71743
cg13964084	2.85357
cg13972054	5.62562
cg13981356	3.51897
cg14011070	-2.55624
cg14017242	2.05563
cg14019323	5.94534
cg14028115	2.22284
cg14049295	2.62481
cg14053749	3.78997
cg14067066	-2.3573
cg14086045	4.4149
cg14087004	0.100817
cg14088357	1.67529
cg14089876	4.54399
cg14090374	3.96785
cg14096279	-4.49926
cg14098532	-1.29112
cg14102128	6.03513
cg14110380	4.57719
cg14113610	0.641636
cg14117138	1.81874
cg14122696	0.922919
cg14138287	0.323518
cg14140379	-1.63886
cg14165614	0.990764
cg14168530	2.62866
cg14177418	2.67418
cg14186799	2.95251
cg14196225	-1.77274
cg14202610	-1.44713
cg14214745	-2.19932
cg14231297	2.81175
cg14279121	1.33461
cg14279702	0.328319
cg14299940	3.72432
cg14301713	1.73949
cg14314071	2.4984
cg14317554	0.565291
cg14317830	-1.73917
cg14323984	-0.966965
cg14335579	1.86241
cg14340070	-3.57411
cg14345128	9.3204
cg14354703	-2.44481
cg14371329	-0.323986
cg14371489	0.588953
cg14372333	0.862202
cg14373210	1.12944
cg14374829	3.97721
cg14375912	4.002
cg14376467	-3.45279
cg14380111	0.668671
cg14381390	-0.668846
cg14385280	-0.634624
cg14393469	2.79204
cg14409029	2.61127
cg14410812	2.89563
cg14415066	2.49791
cg14415166	1.68431
cg14417760	1.56469
cg14460403	2.08467
cg14470895	2.42167
cg14472470	2.8993
cg14482684	-0.151155
cg14502728	5.40999
cg14503180	-0.589935
cg14519793	2.08887
cg14527344	1.61755
cg14531530	0.80437
cg14547644	3.92485
cg14558275	-1.95395
cg14567489	3.74551
cg14577319	-0.968745
cg14579239	1.03668
cg14580667	1.65593
cg14582691	-2.03843
cg14588178	1.96287
cg14588682	-2.42837
cg14589466	0.890816
cg14601251	-1.3965
cg14617642	4.32027
cg14629287	1.36501
cg14648479	2.98909
cg14654731	0.984832
cg14670435	3.78113
cg14675241	1.41287
cg14682699	-3.41065
cg14686309	3.1467
cg14688588	1.20704
cg14703224	0.953395
cg14705099	0.0454143
cg14724613	1.63382
cg14738170	2.22618
cg14745748	-2.03637
cg14765646	2.8228
cg14770349	-0.874067
cg14770958	-2.77481
cg14771954	2.99109
cg14780427	2.88947
cg14795112	-0.295658
cg14795968	2.56114
cg14817541	-0.670902
cg14821473	1.75121
cg14834078	-2.2454
cg14848284	3.35158
cg14852456	2.07253
cg14853194	5.50402
cg14864352	-1.41232
cg14868574	5.28878
cg14868994	-0.0746328
cg14884160	1.81151
cg14900031	0.0536258
cg14906251	3.99561
cg14910241	5.00744
cg14914246	-0.332172
cg14921743	0.431015
cg14926717	5.30601
cg14930642	1.12276
cg14937633	5.11912
cg14938431	0.588192
cg14940212	1.87377
cg14940308	2.4792
cg14980045	-2.05494
cg14981978	-3.59306
cg15020109	7.07691
cg15035033	2.17854
cg15053460	0.17249
cg15063322	2.48234
cg15065622	4.46802
cg15071251	0.104453
cg15081886	-2.43468
cg15106226	-1.79539
cg15124946	-2.8553
cg15133313	-0.298846
cg15134801	3.64758
cg15140774	-3.75999
cg15142694	2.76918
cg15149596	1.26427
cg15169077	2.75118
cg15169189	0.729846
cg15171664	5.81268
cg15179825	0.0893952
cg15195910	-2.18143
cg15229275	1.66937
cg15230985	1.2685
cg15237100	3.84063
cg15237494	4.9402
cg15248264	6.06421
cg15252768	-6.14136
cg15267513	1.08685
cg15270950	4.42252
cg15284719	3.32455
cg15301489	6.20569
cg15320168	1.83468
cg15325373	0.927434
cg15325978	5.50651
cg15327496	-1.44587
cg15331781	1.68713
cg15331902	4.25956
cg15337154	0.548726
cg15347189	3.49141
cg15358752	1.03294
cg15367021	0.677712
cg15373239	1.0551
cg15397448	3.21969
cg15398976	1.77357
cg15408828	3.304
cg15439377	-1.4306
cg15444788	2.6451
cg15460964	3.20437
cg15471402	4.53781
cg15494827	0.354404
cg15500929	4.67711
cg15501381	2.30021
cg15540144	1.36771
cg15554631	0.703171
cg15555932	3.46473
cg15563081	-0.0382421
cg15573359	-0.748644
cg15592187	-2.55461
cg15597821	4.42045
cg15610027	-2.64004
cg15611624	2.41033
cg15613014	1.51938
cg15616946	5.97805
cg15622783	3.69548
cg15623334	1.98538
cg15633128	-0.106889
cg15633699	-2.39151
cg15651099	3.1344
cg15653282	5.68257
cg15665646	1.11584
cg15691822	0.991356
cg15696906	3.9604
cg15720995	4.41567
cg15724773	1.67105
cg15728779	-1.61206
cg15729859	3.17854
cg15762182	-1.97875
cg15776636	3.9928
cg15780888	4.60924
cg15783696	-2.14089
cg15815016	-2.38755
cg15817705	-3.65992
cg15823872	-0.307253
cg15825186	-0.540927
cg15829642	1.79892
cg15831020	-1.24413
cg15833843	3.50073
cg15842317	3.48442
cg15844835	4.41725
cg15853125	0.962388
cg15875860	1.09943
cg15881332	-2.1973
cg15890143	1.403
cg15891112	5.31703
cg15892115	3.18947
cg15897970	2.48699
cg15903666	-1.79554
cg15927357	5.17223
cg15929792	0.960394
cg15937957	3.62418
cg15961842	-1.23719
cg15979674	-0.585218
cg15981071	1.51563
cg15991262	-1.8591
cg15997535	4.6189
cg16014770	-3.46763
cg16020853	3.66395
cg16042149	5.93375
cg16043144	2.58628
cg16045347	0.588825
cg16062706	1.28881
cg16066237	9.33463
cg16073378	2.85321
cg16101611	2.29395
cg16104076	1.88643
cg16107001	1.68002
cg16109766	-0.974397
cg16126816	4.97441
cg16135716	5.50987
cg16150451	1.85791
cg16150677	5.54704
cg16151541	1.00089
cg16152424	4.16528
cg16155498	2.85724
cg16162668	0.81142
cg16203801	4.05775
cg16213581	0.728956
cg16254962	2.43557
cg16256094	-1.63221
cg16265906	3.71452
cg16271002	5.02306
cg16279003	2.1613
cg16291750	-3.16165
cg16292016	4.13289
cg16296679	-1.71745
cg16298547	-0.115335
cg16299428	5.11878
cg16301890	4.26949
cg16314401	1.55858
cg16316180	-1.43026
cg16316649	3.90106
cg16317273	1.54028
cg16331051	1.05952
cg16367085	6.32103
cg16370645	0.762667
cg16370875	4.63026
cg16391151	-1.47022
cg16397884	2.59999
cg16400999	2.26651
cg16402270	-2.29227
cg16405557	3.26355
cg16409955	1.23997
cg16420308	-2.70069
cg16430909	-2.10554
cg16435923	3.04941
[truncated: 1,203 more rows]

## Sheet: 019
probe_id	median_change
cg00007426	-0.0386273
cg00009421	-2.78981
cg00028336	-1.9137
cg00028678	-2.67238
cg00031568	-3.00605
cg00035673	-2.48947
cg00054197	-1.50393
cg00055529	-4.39373
cg00057966	-1.47618
cg00065048	-2.98533
cg00066828	-1.88969
cg00071554	-3.5649
cg00073460	-4.20262
cg00081104	-3.16249
cg00081439	-3.32667
cg00090936	2.99549
cg00100680	-6.66682
cg00110519	-1.76661
cg00117005	-7.62759
cg00134539	-0.528438
cg00136405	-5.30264
cg00140447	-2.00118
cg00145141	-2.23943
cg00176888	-2.58286
cg00180930	-2.40817
cg00187059	-2.53083
cg00200526	-2.10838
cg00202829	-2.99373
cg00213189	-0.00938514
cg00225126	-2.13176
cg00228281	0.280052
cg00234200	-3.0301
cg00239751	-1.44442
cg00252210	-2.50424
cg00253564	-1.08656
cg00253724	-3.09776
cg00256789	-1.41074
cg00270141	-2.76497
cg00272709	-4.77688
cg00273340	-3.87208
cg00273863	-2.17616
cg00277898	-5.04896
cg00281369	-2.44499
cg00285060	0.676473
cg00290218	-1.83371
cg00291316	0.30024
cg00297776	-3.48741
cg00332307	0.572263
cg00333528	-4.38927
cg00333946	-3.81386
cg00339300	-3.80595
cg00339695	-2.66954
cg00350478	-2.6525
cg00367281	-3.65516
cg00382185	-2.91401
cg00401745	-2.00809
cg00413089	-1.46669
cg00419321	-5.90249
cg00420450	-3.24875
cg00428051	-1.50751
cg00457684	-2.75579
cg00459909	-2.8221
cg00462951	4.97253
cg00464046	-1.35759
cg00467513	-0.116689
cg00482804	-1.93837
cg00499277	-0.540849
cg00501482	-1.63768
cg00508604	-0.399261
cg00512404	-1.74469
cg00515352	-2.45793
cg00515669	-1.0228
cg00528016	-0.558935
cg00528453	-1.76003
cg00530448	0.215609
cg00531009	-0.957375
cg00532157	2.13798
cg00532656	-3.02293
cg00546113	-2.88105
cg00547103	-2.1862
cg00551954	-1.73411
cg00553195	-2.11712
cg00554539	-1.25237
cg00563566	0.482117
cg00567190	0.494399
cg00581130	-1.29548
cg00591471	-0.788566
cg00591515	-0.670023
cg00595982	-3.43393
cg00599812	-3.85263
cg00600029	0.449441
cg00606841	0.695957
cg00606914	-1.31357
cg00608334	-2.64559
cg00617691	-2.08874
cg00622658	0.193447
cg00632188	-1.70565
cg00633015	-1.25883
cg00643557	-1.51872
cg00656881	0.0436197
cg00657529	-1.31729
cg00660737	-1.60249
cg00668852	-2.3374
cg00676833	-1.44928
cg00691965	0.359436
cg00700728	-4.05866
cg00703557	-1.47882
cg00705576	0.997661
cg00706570	-5.68655
cg00706914	0.433052
cg00718518	-1.91846
cg00720047	-2.93991
cg00720429	-1.70682
cg00720475	2.82163
cg00721819	-1.58885
cg00728602	-2.36442
cg00731683	-2.5876
cg00735257	-0.947249
cg00748195	-2.3241
cg00764632	-2.27712
cg00767058	-2.00143
cg00791712	-2.78836
cg00810908	-2.72465
cg00812299	-1.08636
cg00814898	-1.21982
cg00815399	-3.87296
cg00816609	0.116954
cg00816880	-1.47463
cg00828762	-0.298419
cg00839132	-6.01445
cg00844821	-1.55934
cg00873659	-4.11065
cg00885904	-1.72174
cg00900444	-2.19072
cg00901940	-6.33857
cg00919014	-2.43366
cg00921309	-3.35818
cg00931418	-1.02208
cg00935328	0.808343
cg00942293	-3.19849
cg00942920	-3.05247
cg00946491	-4.93814
cg00957002	-3.97792
cg00963044	0.633707
cg00969446	0.516491
cg00971369	-4.95724
cg00976340	-2.36242
cg00985247	-1.70406
cg00995133	-2.40816
cg01000248	0.0680826
cg01002529	1.06796
cg01008023	-2.80853
cg01016662	-1.79252
cg01025095	-3.50567
cg01036732	-2.25687
cg01042424	-2.99255
cg01046703	-0.539678
cg01051545	-2.56308
cg01064918	-0.46116
cg01075915	-2.77226
cg01077039	0.0134096
cg01077058	-4.24664
cg01087690	-2.19398
cg01089702	-3.75927
cg01094192	-1.6178
cg01100175	-2.31392
cg01101619	-0.858623
cg01104073	-1.88019
cg01106410	-0.324419
cg01113435	-1.52096
cg01117170	-0.122693
cg01123353	-2.38684
cg01143097	-4.60112
cg01144086	-2.80901
cg01144283	-0.529818
cg01151886	-2.97661
cg01157470	-0.514941
cg01171355	-0.0880695
cg01175610	-3.47128
cg01182863	-4.75109
cg01184520	-0.452527
cg01185626	-1.09631
cg01194674	-2.23088
cg01195404	-1.56163
cg01207600	0.721168
cg01208224	-2.05474
cg01219924	-2.61894
cg01227696	-4.92179
cg01229421	-4.83691
cg01232511	-3.01261
cg01242872	-1.88212
cg01247683	-2.62468
cg01259156	-1.76758
cg01266985	-2.29382
cg01281231	-3.2886
cg01284527	-1.9689
cg01291920	-0.0548009
cg01295631	-3.1968
cg01302656	-1.40486
cg01303008	-0.213631
cg01311181	-4.18001
cg01322405	-2.41616
cg01341572	-0.984115
cg01342196	-4.96466
cg01350330	-3.19696
cg01360618	5.89951
cg01367322	-0.915755
cg01368872	-3.23721
cg01374787	-3.43498
cg01384111	-3.26375
cg01393985	-3.37232
cg01394199	-2.16369
cg01394390	-2.73666
cg01402832	-0.781572
cg01406482	-1.99243
cg01421119	1.39557
cg01427567	-2.46201
cg01433152	-5.53157
cg01435643	-5.11219
cg01437781	-2.45018
cg01443426	-3.55261
cg01462566	-2.53678
cg01481879	-2.67458
cg01492538	-2.67066
cg01493621	-2.20266
cg01534125	-4.9974
cg01540953	-1.59934
cg01544454	-1.73834
cg01559901	0.367096
cg01563031	1.26666
cg01569295	-1.94833
cg01577760	-3.11078
cg01584483	-1.79233
cg01587390	-0.90386
cg01595997	-1.81246
cg01617074	-1.90473
cg01622379	0.0819543
cg01631777	-1.5197
cg01646718	-2.1093
cg01657556	-2.44511
cg01658789	0.511122
cg01672129	-2.00597
cg01672655	-2.34731
cg01677561	-0.615513
cg01694529	-0.330882
cg01698177	-1.2644
cg01701630	-5.22358
cg01710897	-1.71616
cg01716499	-2.45044
cg01733599	-4.06173
cg01750032	1.64918
cg01762581	-1.49656
cg01766718	-1.54208
cg01780943	-1.74038
cg01780990	-2.78054
cg01787808	-2.17269
cg01819502	-3.91906
cg01822624	1.10028
cg01835021	-2.88276
cg01837016	-1.2589
cg01847457	-1.31656
cg01852522	-5.66743
cg01855371	-2.44842
cg01860063	0.463174
cg01868791	-2.3589
cg01869288	-3.45998
cg01883777	-5.00554
cg01886855	-3.16801
cg01891738	-3.35568
cg01893414	6.04293
cg01898225	-1.59477
cg01899620	-1.77549
cg01905172	-1.39453
cg01907005	-0.0932677
cg01919377	-1.17156
cg01919768	-5.46931
cg01922936	3.87172
cg01930356	-1.48357
cg01934781	2.06206
cg01935582	-1.7573
cg01941313	-0.0779223
cg01943983	-2.09451
cg01946824	-3.28445
cg01948944	-1.74781
cg01953591	0.363361
cg01956717	-2.36663
cg01960885	-0.326832
cg01971160	-2.20385
cg01974195	-2.66299
cg01974921	-0.588016
cg01976002	0.372626
cg01981268	-0.763506
cg01984798	1.18324
cg01995306	2.64907
cg01999608	0.540261
cg02014791	-2.40012
cg02016723	-0.930134
cg02025860	0.398832
cg02026024	-0.525682
cg02031386	-2.08032
cg02042384	-3.42846
cg02044855	-4.9322
cg02052895	4.03762
cg02052933	-0.912651
cg02060443	-2.05522
cg02068390	0.635517
cg02076365	-0.0801849
cg02083428	-1.60038
cg02090341	-1.86669
cg02091973	-2.6402
cg02094774	-0.754426
cg02096793	3.75331
cg02102832	-0.366709
cg02103924	-3.87107
cg02104962	-1.34223
cg02108196	-0.0801387
cg02108736	-0.86864
cg02110529	-4.99027
cg02110769	-1.64107
cg02118635	-0.225756
cg02127209	-3.89752
cg02136596	-3.77213
cg02140579	-1.4617
cg02148975	-0.685436
cg02159996	-2.50707
cg02171093	0.334773
cg02177648	-3.42331
cg02182754	-2.49383
cg02186140	-2.20862
cg02187688	-1.4739
cg02188225	-0.410297
cg02190597	-1.5339
cg02196147	-2.51364
cg02203881	-2.80006
cg02214758	-2.38475
cg02221679	-2.17015
cg02224516	-3.76554
cg02234983	-1.49999
cg02238178	-2.28893
cg02242344	-3.34759
cg02264491	-1.24651
cg02272968	-0.463926
cg02280309	-1.50382
cg02287939	0.0685243
cg02294138	-2.60924
cg02296564	-2.43021
cg02303651	-2.25886
cg02324774	-1.18856
cg02343736	-2.43191
cg02346447	-3.71527
cg02352398	-3.03123
cg02355046	-2.58453
cg02358196	-0.339199
cg02381321	-2.79428
cg02385840	0.696269
cg02390725	-2.07364
cg02407205	-1.77782
cg02423817	-4.53656
cg02428538	0.187294
cg02432444	-1.01885
cg02434443	0.314217
cg02443658	-4.52277
cg02444118	-0.356316
cg02464665	-4.43745
cg02468316	-2.30992
cg02477931	-1.1602
cg02481000	-1.27419
cg02482218	3.24169
cg02485462	-4.34795
cg02494246	-0.970283
cg02510267	3.8097
cg02512860	-1.6934
cg02517488	-2.78729
cg02519208	-1.74586
cg02538046	-1.56288
cg02540537	-2.17565
cg02543989	2.7497
cg02546490	0.758647
cg02571142	-1.40936
cg02571972	-3.44802
cg02581302	-1.01977
cg02591213	-4.73057
cg02597092	-0.618516
cg02607683	0.353434
cg02618355	-0.360398
cg02628680	-1.18513
cg02628700	-5.07551
cg02630233	-4.97655
cg02631583	-2.6009
cg02643218	2.71202
cg02646251	-0.49765
cg02648298	-1.43632
cg02658528	-3.38263
cg02659431	-2.71324
cg02667656	-2.2345
cg02678305	-1.29522
cg02678971	-0.867432
cg02684104	-3.38142
cg02686662	0.980889
cg02691934	-0.902515
cg02713266	0.476893
cg02719634	-3.40654
cg02723372	-1.68329
cg02731042	0.491389
cg02731554	-4.12062
cg02756939	-0.187603
cg02765366	-2.90852
cg02781074	-7.42616
cg02786912	-1.59589
cg02788189	-1.56233
cg02788857	-5.18934
cg02800396	-1.28983
cg02802163	-2.04749
cg02803996	-2.0967
cg02844611	-1.82134
cg02846247	-2.56227
cg02848157	-0.951781
cg02855983	-2.98166
cg02858997	-3.8728
cg02860732	1.29719
cg02864535	-0.402419
cg02865675	-1.5052
cg02885428	0.349636
cg02887997	-2.31518
cg02901139	-2.16869
cg02902489	0.511446
cg02902946	-1.70872
cg02914427	-0.520675
cg02915029	-0.722688
cg02918040	-1.623
cg02927949	-0.695295
cg02941293	-0.224443
cg02951558	-2.41379
cg02952984	-3.66155
cg02960294	-1.70381
cg02963633	0.473173
cg02972793	-3.3618
cg02978496	-5.46356
cg02986643	-0.997159
cg02997962	-0.0139166
cg03001276	-0.419181
cg03006515	-0.597422
cg03010301	-2.04593
cg03016927	-5.15399
cg03020547	-0.977358
cg03037850	-2.08852
cg03039519	0.329945
cg03041029	-3.45179
cg03043804	-2.16005
cg03057083	0.290536
cg03062429	-1.50259
cg03070256	-4.87465
cg03073361	-0.703902
cg03074946	-3.85877
cg03089370	-2.75432
cg03092019	-1.56155
cg03093541	-0.413931
cg03095607	-1.13274
cg03104936	1.08748
cg03106245	-1.20095
cg03112314	-0.548212
cg03123551	-1.93981
cg03131829	-2.33549
cg03134551	4.29569
cg03139053	3.8612
cg03143118	-1.18681
cg03143395	-1.19762
cg03145924	-1.60518
cg03146865	-0.0541487
cg03149128	-1.78456
cg03155999	-1.36216
cg03157395	-0.592716
cg03161223	0.221735
cg03198733	-1.80067
cg03233885	-2.62245
cg03242511	0.597392
cg03243551	-4.13773
cg03246105	2.32721
cg03255221	-0.600084
cg03263694	0.204984
cg03298405	-1.98853
cg03301240	-2.1336
cg03314473	-1.81752
cg03318314	0.170919
cg03319638	-3.7484
cg03322328	-2.26305
cg03323793	-1.41338
cg03327829	-1.0958
cg03329603	-3.91444
cg03334213	-2.988
cg03347890	-2.87308
cg03353124	-0.0334642
cg03353885	-1.84943
cg03360992	0.563562
cg03363031	3.90131
cg03363743	-4.00705
cg03370077	-1.74108
cg03400623	-0.825821
cg03437675	-1.22944
cg03444488	-2.14469
cg03445006	-1.2981
cg03451743	-4.66742
cg03467047	-2.8183
cg03467405	-3.46712
cg03477252	-5.25226
cg03485533	-0.154872
cg03490138	-2.30459
cg03499675	-1.95946
cg03502979	-2.23076
cg03509771	-1.08758
cg03519577	-0.292106
cg03523676	-2.18673
cg03531984	-0.820476
cg03532263	-5.12926
cg03542755	0.453648
cg03549705	0.354248
cg03555710	-2.75651
cg03555914	-2.01759
cg03564620	-5.08744
cg03565868	-2.05082
cg03580831	0.0697085
cg03595161	0.0966081
cg03598075	-2.67572
cg03605284	-4.58147
cg03611078	-2.75223
cg03612011	-2.74568
cg03613003	-1.01121
cg03625149	-3.06215
cg03635488	-3.71996
cg03652525	-3.28282
cg03653399	-2.01275
cg03659476	-2.53184
cg03661949	-3.04846
cg03662172	-0.776153
cg03689076	4.65159
cg03692782	-0.599932
cg03699074	-4.30633
cg03702011	-1.4159
cg03702435	-0.426736
cg03702646	-5.42295
cg03703637	5.0544
cg03704061	-2.58711
cg03704407	-3.18154
cg03709925	1.28359
cg03709939	0.663507
cg03712221	-1.35297
cg03721967	0.183871
cg03722643	-0.295743
cg03724640	-1.8907
cg03740323	-4.40861
cg03742273	-5.7433
cg03753683	-4.24095
cg03763796	-5.37056
cg03815538	-2.38788
cg03820379	-0.680301
cg03831180	-3.00739
cg03847535	-1.39068
cg03862380	-3.28273
cg03880509	-2.35635
cg03883784	-1.65199
cg03892041	-2.56391
cg03892714	-0.219178
cg03904711	-2.23282
cg03910375	-1.4583
cg03912984	0.238062
cg03919781	1.26127
cg03922146	-3.25441
cg03927131	0.0119831
cg03928565	-3.21328
cg03934926	-2.97783
cg03968010	-4.0545
cg03975797	4.85915
cg03977294	1.05301
cg03980366	-1.61715
cg03982376	-2.18615
cg03992096	-0.283981
cg04014297	-0.943551
cg04015777	-3.93701
cg04016086	6.74534
cg04017276	-4.62832
cg04038932	1.04174
cg04039957	-2.64787
cg04040317	-2.07774
cg04040969	-4.60847
cg04043150	-3.05082
cg04044490	-1.42204
cg04058799	-0.358071
cg04065347	-1.97508
cg04070987	-1.21527
cg04071798	-3.30193
cg04083416	-2.66242
cg04086097	-2.25949
cg04090349	-4.09317
cg04090834	-1.81267
cg04105716	-1.93164
cg04106647	1.53474
cg04120272	-4.5329
cg04127881	-5.05521
cg04132809	-1.981
cg04139049	-2.09788
cg04167833	-3.06484
cg04172115	-1.32991
cg04182207	-3.03403
cg04182226	-3.48635
cg04186415	-1.22813
cg04190037	-3.55814
cg04211581	-2.7841
cg04221388	-0.211077
cg04224624	0.0714052
cg04225760	-1.43656
cg04226375	-0.710526
cg04226648	-2.6846
cg04232466	-0.511043
cg04242559	-1.42521
cg04250512	-1.10929
cg04256697	-0.0994724
cg04258102	-2.16055
cg04259168	-1.93149
cg04261192	1.40178
cg04275695	-0.124843
cg04286193	0.491018
cg04293778	-0.546025
cg04319462	0.925773
cg04338788	-0.963608
cg04342955	1.88365
cg04353171	-1.81465
cg04356233	2.07374
cg04357541	0.290359
cg04359635	-0.644437
cg04371212	-3.40381
cg04380513	5.01255
cg04385966	-1.90911
cg04390488	0.477876
cg04398180	-2.45867
cg04399147	-4.66383
cg04400583	-2.5694
cg04401646	-1.79443
cg04405612	-3.73378
cg04413673	-2.25941
cg04426485	-0.741246
cg04427860	-0.243308
cg04430995	-5.51919
cg04451485	-4.9803
cg04457792	-2.57233
cg04468621	-2.86251
cg04468817	-2.08677
cg04471589	-1.75404
cg04473569	-0.85726
cg04491591	-3.33604
cg04511534	-0.249477
cg04513540	0.230838
cg04514683	-2.19023
cg04532438	-2.12201
cg04539111	-2.55737
cg04541675	-2.367
cg04542911	4.97183
cg04551967	-3.8898
cg04563693	-3.43259
cg04563946	-5.0535
cg04569055	-0.943139
cg04591623	-0.728993
cg04615095	-3.87492
cg04616363	-3.684
cg04617251	1.50475
cg04647768	1.82741
cg04647790	-2.94388
cg04653627	-1.45711
cg04660829	0.658919
cg04661915	-2.3555
cg04662629	-3.61595
cg04672418	-3.83377
cg04675221	-0.53907
cg04692301	-3.34167
cg04702647	-2.56674
cg04718492	-2.59293
cg04719537	2.5351
cg04723137	-0.851
cg04756594	-1.16608
cg04757093	-1.18506
cg04768606	-3.66763
cg04770218	-1.93282
cg04770550	-5.51054
cg04783977	0.0101406
cg04785916	-4.2925
cg04790124	-4.07111
cg04802221	-2.04672
cg04804543	-1.55143
cg04805131	-3.9689
cg04806409	-2.53484
cg04807245	-0.814487
cg04810660	-1.7066
cg04819180	-3.59953
cg04822621	-0.738528
cg04823952	-1.36224
cg04828696	-2.46449
cg04835799	-2.49268
cg04837902	-0.31171
cg04841389	-2.45086
cg04841607	-1.9859
cg04851675	-2.72102
cg04858960	-2.11654
cg04861531	-1.89034
cg04864179	-2.12962
cg04872541	0.118888
cg04875020	-1.91521
cg04880732	0.123096
cg04885832	-1.87491
cg04894705	-3.24824
cg04927910	-1.51424
cg04937383	0.0707971
cg04938317	0.711593
cg04953373	-1.69521
cg04984852	-3.11274
cg04995291	-2.98137
cg05006473	-0.517849
cg05016953	-1.92251
cg05023526	-0.241863
cg05033529	-3.94991
cg05036314	-1.79506
cg05060686	-0.834166
cg05061107	-1.73949
cg05082205	-1.05619
cg05094315	-6.21567
cg05098869	-1.14963
cg05100067	-0.328814
cg05110962	-2.68948
cg05119057	-1.88331
cg05130081	-2.29902
cg05147195	-3.90771
cg05157492	-0.165593
cg05163330	-3.68336
cg05181290	-0.127336
cg05182627	-2.88268
cg05184978	-1.55272
cg05194484	-2.2524
cg05201185	-1.29877
cg05205351	-3.05078
cg05226172	-2.10433
cg05238495	4.33961
cg05238699	-3.2146
cg05254078	-1.68668
cg05283597	-0.0919789
cg05285677	0.375291
cg05292376	-1.53266
cg05298224	-3.13059
cg05301852	-1.07661
cg05305155	-2.11881
cg05328339	-1.47239
cg05328761	-0.841404
cg05353099	-1.5463
cg05355216	-2.00936
cg05355301	-3.63608
cg05370752	-0.719134
cg05371135	-0.109089
cg05378199	-2.27043
cg05392513	-2.96869
cg05402891	-1.61829
cg05403383	-3.46036
cg05424970	-1.89684
cg05432469	-1.08769
cg05433490	-2.37582
cg05447916	-2.62004
cg05456789	-1.77425
cg05473289	0.136744
cg05476483	-1.77075
cg05479435	-4.4548
cg05481201	-1.85945
cg05493001	-1.46332
cg05495790	-7.45437
cg05506011	-2.53094
cg05512844	-3.11742
cg05523680	0.563776
cg05523897	-1.96728
cg05524529	0.928717
cg05538432	-2.49892
cg05555852	-1.2099
cg05560932	-0.619279
cg05572157	-1.67812
cg05583103	-2.26966
cg05602157	-0.450371
cg05608730	-1.67532
cg05615487	-4.35804
cg05624445	-1.01187
cg05635274	-0.913581
cg05645634	-3.90378
cg05655190	-1.71286
cg05659262	0.171258
cg05671561	-1.57445
cg05681859	-2.64701
cg05687091	-3.02637
cg05691152	1.26419
cg05692716	-3.00957
cg05693331	-3.62284
cg05698069	-1.63323
cg05701254	-0.392738
cg05703096	-2.59357
cg05712931	-0.973626
cg05716278	-3.73713
cg05717478	-0.552247
cg05737638	-1.84373
cg05757440	-4.68806
cg05760972	-5.23385
cg05766136	-0.424226
cg05771094	-1.83235
cg05779406	-2.61173
cg05783223	-1.76973
cg05785348	-3.21542
cg05798429	-1.57566
cg05798996	-1.72743
cg05809437	-5.42541
cg05817443	-0.893458
cg05839595	-3.64474
cg05844977	-1.62122
cg05852143	4.4185
cg05862812	-1.63745
cg05864261	-4.16825
cg05886418	-1.38645
cg05892503	-3.38937
cg05904013	-1.57259
cg05917748	-3.21938
cg05918577	-1.12547
cg05942334	-1.68382
cg05948856	0.0214545
cg05956498	4.41452
cg05973414	-0.0605156
cg05978527	-0.505772
cg05998899	-4.45482
cg05998930	2.26335
cg06007201	-4.49038
cg06013060	-5.28127
cg06014083	-4.04448
cg06015997	-1.64757
cg06020727	-2.36497
cg06022936	-2.65463
cg06028303	3.33696
cg06039489	-3.62739
cg06042826	-1.70025
cg06048910	-6.2418
cg06056514	-0.269732
cg06061408	1.01533
cg06070625	-3.38799
cg06073141	-3.04146
cg06073714	-0.25652
cg06077305	-1.55469
cg06084174	-2.75668
cg06099014	-0.0644901
cg06100461	-1.1219
cg06118384	-1.79788
cg06122148	0.589385
cg06126713	-1.20319
cg06129423	-1.99366
cg06133459	-1.34321
cg06134964	-2.32164
cg06139438	0.68309
cg06147863	-4.01105
cg06178310	-2.52677
cg06186790	-3.51295
cg06202183	-1.79305
cg06203307	-1.71403
cg06221449	1.95342
cg06222383	-1.8178
cg06226279	-0.645705
cg06229084	-0.0119375
cg06240209	-0.967865
cg06245962	-4.9579
cg06254425	-0.497283
cg06294376	-2.051
cg06296542	-2.18439
cg06301529	-2.59966
cg06310131	-3.0575
cg06312651	-1.11349
cg06319999	-4.0143
cg06320213	-0.234705
cg06341047	-5.64147
cg06347478	-1.91497
cg06349632	-0.284253
cg06358270	-2.34221
cg06363129	-1.44938
cg06363214	-0.81602
cg06373684	-0.622272
cg06378129	-1.37122
cg06381665	-0.175818
cg06393227	-1.65262
cg06410169	-0.940763
cg06427508	0.0347615
cg06444781	0.0104881
cg06444800	-2.19838
cg06445972	-0.694295
cg06451498	-2.66664
cg06457396	-2.05324
cg06464962	3.14805
cg06477487	-2.27697
cg06482830	-2.35293
cg06485139	-1.51329
cg06495763	-4.77106
cg06495803	-1.29936
cg06498481	-4.44085
cg06513977	-5.78305
cg06518099	-1.11162
cg06518251	-3.80605
cg06520814	-2.24195
cg06526741	-1.96509
cg06532338	-0.42285
cg06539391	-2.95727
cg06539490	-5.23374
cg06540636	-2.87841
cg06543116	-3.3512
cg06552989	-3.38626
cg06569512	-1.83422
cg06574521	-2.15126
cg06576340	-1.88387
cg06577766	-0.544115
cg06580074	-2.15543
cg06581491	-1.81886
cg06585893	0.727568
cg06594770	0.405241
cg06600153	0.198007
cg06610675	-1.76768
cg06611115	1.31075
cg06619706	-0.641119
cg06627277	-4.31863
cg06637017	-2.41966
cg06644373	5.54852
cg06644488	2.93666
cg06658237	-1.65752
cg06661242	-0.825889
cg06663662	-3.67048
cg06669405	0.759629
cg06672545	-3.79216
cg06676603	-4.59413
cg06690906	-4.41125
cg06709331	-1.41311
cg06710672	-0.626701
cg06711298	-2.40624
cg06711380	-3.76484
cg06762457	-1.97103
cg06770908	0.381439
cg06782614	-0.420952
cg06783121	-3.54743
cg06795722	-0.220879
cg06802538	-3.10753
cg06809823	-4.53071
cg06821079	-2.41049
cg06821828	-8.23256
cg06824720	-2.57047
cg06832183	-2.20314
cg06835281	-1.1488
cg06840801	-1.9653
cg06867482	-2.88576
cg06868377	-0.987741
cg06873316	3.55965
cg06881239	-4.93536
cg06885459	-2.48071
cg06886207	3.44202
cg06899970	0.651144
cg06903075	-1.77492
cg06917671	-2.00067
cg06944559	-0.918498
cg06951383	-1.51677
cg06952534	-1.45221
cg06958535	0.265733
cg06969469	-5.80199
cg06981073	-1.164
cg06994652	-2.40248
cg06997937	-1.07646
cg07003643	-1.66767
cg07005767	-3.41103
cg07006673	-5.28155
cg07012128	-4.25668
cg07031872	-4.16117
cg07048210	-0.37979
cg07054668	-4.09396
cg07057320	-3.67655
cg07059925	-1.05398
cg07060175	-1.92304
cg07064544	-1.29723
cg07068570	-4.16246
cg07071809	-2.46028
cg07073072	-2.3203
cg07098566	-4.34859
cg07099998	-0.42541
cg07113570	-5.67268
cg07123668	-0.632653
cg07131544	-1.29551
cg07133355	-0.978954
cg07134254	4.01766
cg07141002	-4.67086
cg07150830	-3.17813
cg07152939	-0.444661
cg07156636	-3.96991
cg07162999	-4.78591
cg07168818	5.59053
cg07170546	-1.76204
cg07173112	-2.4983
cg07202981	-4.13619
cg07217030	-1.25842
cg07219440	-0.277373
cg07220448	-1.57328
cg07220586	-1.2355
cg07221576	-1.93751
cg07225555	-4.13299
cg07228441	-0.263518
cg07228869	-0.33085
cg07230639	-3.38929
cg07233109	-1.39519
cg07236925	-1.77301
cg07240005	-1.98139
cg07252486	-0.290805
cg07252792	-3.02309
cg07266657	-0.194018
cg07272677	-1.81058
cg07280731	-5.40149
cg07292442	0.639469
cg07298985	-3.26088
cg07310179	-0.491187
cg07318627	-0.0533226
cg07329131	-2.27647
cg07332971	-1.48645
cg07338713	-1.80266
cg07359306	-6.16284
cg07363850	-1.68996
cg07374243	-2.99712
cg07399928	-2.03692
cg07404514	-1.94217
cg07409643	-2.69044
cg07411810	-2.15679
cg07419011	-2.22634
cg07425005	0.120266
cg07441854	-2.66647
cg07459121	-3.71455
cg07463059	-4.40796
cg07481398	-1.87224
cg07481886	-2.3442
cg07482574	-1.83224
cg07486732	-0.371178
cg07488803	-2.75231
cg07489447	-1.59979
cg07503069	-3.12012
cg07508942	0.324664
cg07512313	-2.28748
cg07537147	-2.3935
cg07539182	-1.54154
cg07545858	-2.90554
cg07548381	-0.783549
cg07559653	-2.60002
cg07571451	2.87388
cg07582470	0.396782
cg07592095	1.79983
cg07595906	-0.258643
cg07611519	-4.55377
cg07624539	-1.3639
cg07656055	-1.53314
cg07659651	-0.0766491
cg07663789	0.631823
cg07675031	-2.62611
cg07677930	1.0567
cg07681696	0.241317
cg07682515	-3.21373
cg07693617	-2.51262
cg07697189	-0.82027
cg07698804	-4.95947
cg07704981	-1.45055
cg07705769	-2.42556
cg07723474	-0.973002
cg07736139	-3.29138
cg07741616	-2.37333
cg07741910	-2.2728
cg07744075	-1.17014
cg07751793	-2.15242
cg07753644	-1.63865
cg07758907	-0.567032
cg07762099	-4.95012
cg07769015	-2.53131
cg07774177	-2.10826
cg07777652	-1.35891
cg07787398	-3.61162
cg07790870	-6.8014
cg07798610	-3.93733
cg07811376	-0.550267
cg07815799	-1.44593
cg07816439	-3.01588
cg07825685	-0.925265
cg07839371	-1.63154
cg07841371	-2.25423
cg07847895	-4.99881
cg07854207	3.12754
cg07855083	8.22956
cg07856138	-5.18258
cg07857040	-3.93979
cg07865418	-1.05865
cg07887517	-1.76242
cg07897701	-2.65694
cg07898264	-3.01018
cg07904817	-3.57164
cg07904865	-2.7536
cg07905105	-2.95661
cg07905975	-6.46176
cg07909223	-0.915239
cg07918814	-1.68246
cg07927098	-0.0391447
cg07933854	-4.51488
cg07947615	-2.08311
cg07955315	-0.830309
cg07972557	-1.19084
cg07987697	-1.60577
cg07998840	-1.11141
cg08007465	1.48047
cg08008105	-4.03808
cg08012275	-4.00454
cg08024827	-2.71201
cg08026412	-0.415739
cg08043656	-0.933319
cg08049923	-2.44551
cg08066637	-2.34661
cg08080213	-3.60975
cg08097446	-1.82545
cg08098964	-5.81938
cg08102414	-1.42631
cg08114617	-3.0598
cg08115069	-0.724855
cg08123106	-3.11295
cg08123341	-2.2994
cg08126654	-3.03633
cg08133268	-3.52176
cg08140274	-2.96156
cg08161546	-1.65342
cg08177041	-0.726177
cg08177681	-5.42461
cg08198486	-0.546907
cg08204783	-3.19598
cg08210727	1.35879
cg08246318	-2.83263
cg08251901	-0.958223
cg08255964	-2.11515
cg08270789	-2.91761
cg08272105	-2.06554
cg08277746	-2.04575
cg08295211	-0.82261
cg08295452	-1.94791
cg08298534	-0.655232
cg08321483	-4.72814
cg08330349	-1.76469
cg08336641	4.71597
cg08362880	-3.58217
cg08363339	-6.859
cg08367318	-0.808233
cg08369368	-2.45038
cg08375550	0.0403354
cg08382137	-2.90416
cg08390352	1.38887
cg08401483	-2.20412
cg08402734	-1.72035
cg08409983	-2.91432
cg08411068	-3.68175
cg08417104	-2.5764
cg08417692	1.57928
cg08421271	-1.49963
cg08438837	-3.86928
cg08441822	-2.57594
cg08453096	-4.12168
cg08458055	-0.410055
cg08458121	-4.02217
cg08459182	-0.916773
cg08461100	1.68768
cg08473764	0.119464
cg08476843	-4.86514
cg08478116	-2.4502
cg08480068	-0.804297
cg08482465	-3.20964
cg08493463	-3.4594
cg08510885	-2.91709
cg08514779	-2.15398
cg08515044	-2.21396
cg08519728	-4.17401
cg08533221	-0.127306
cg08540215	-1.90638
cg08543952	-2.98032
cg08562149	-2.36426
cg08563054	-2.15208
cg08573102	-0.82905
cg08601192	-1.1951
cg08603382	-0.781265
cg08611689	-3.86549
cg08615694	-5.08671
cg08616234	-0.331171
cg08626831	-3.96035
cg08632711	-1.85705
cg08640790	-2.76909
cg08651034	3.55172
cg08655788	-2.50851
cg08660994	-6.81118
cg08662475	-1.29798
cg08663446	-5.44397
cg08669954	-2.72295
cg08670465	-3.88352
cg08678044	-4.19214
cg08683012	-0.736253
cg08709276	-2.90097
cg08729755	-2.08983
cg08734124	-1.52012
cg08736680	-2.27208
cg08743794	-2.30653
cg08745595	-4.1585
cg08768852	3.70755
cg08779779	0.425918
cg08782899	-4.59236
cg08785944	-0.474565
cg08801691	-1.92233
cg08809539	-3.75936
cg08809919	-2.47225
cg08813936	-1.67762
cg08827700	-0.39272
cg08831522	-3.19796
cg08832418	-3.14913
cg08832782	-0.383736
cg08835688	6.9499
cg08837344	-3.69783
cg08839186	-2.30307
cg08844770	-2.79693
cg08859278	-1.87644
cg08862061	-0.113279
cg08865574	-2.55977
cg08866129	-3.13697
cg08869118	-1.45939
cg08872722	-3.02607
cg08876437	-1.73364
cg08906153	-2.39769
cg08906363	-2.08869
cg08913672	-1.77486
cg08914190	-3.57749
cg08930413	-1.29395
cg08955358	-5.07506
cg08961558	-2.09707
cg08983186	-2.76105
cg08999895	-1.84956
cg09001112	-3.19876
cg09005171	-1.9742
cg09005548	-2.10688
cg09006159	-1.45961
cg09009380	-1.45958
cg09015973	-0.478041
cg09054528	-3.51109
cg09068447	-3.04261
cg09093476	-3.37166
cg09115485	-3.3535
cg09117114	-1.60666
cg09122652	-2.36322
cg09138892	-1.42533
cg09139451	-1.82615
cg09148494	-0.0986466
cg09150232	2.01849
cg09153826	-2.49334
cg09155001	-1.97328
cg09156014	-0.700419
cg09175620	-1.22674
cg09184899	-3.09797
cg09185884	-2.08634
cg09186818	-3.36845
cg09187107	-0.119165
cg09208203	-5.50768
cg09209250	-2.01318
cg09222749	-3.54869
cg09228402	-0.144193
cg09229683	0.636961
cg09231992	-2.49579
cg09236509	-3.76784
cg09238000	-1.87278
cg09242311	-1.40097
cg09243037	-0.165805
cg09246302	-1.458
cg09256393	-1.40491
cg09258993	-3.07615
cg09261900	-3.8293
cg09278540	1.21159
cg09280610	-1.91351
cg09286493	-2.49434
cg09290397	-3.2664
cg09297903	-1.99902
cg09325003	-5.44553
cg09328046	-0.318494
cg09329758	-0.929865
cg09337254	-2.82773
cg09337375	-1.06695
cg09343421	-1.41547
cg09344984	-1.50416
cg09354050	-2.06591
cg09363157	0.199331
cg09365002	-8.03083
cg09366861	3.95318
cg09370867	-2.98879
cg09379489	-3.37815
cg09383860	-1.75949
cg09397783	-5.976
cg09399176	-3.13336
cg09400887	5.66685
cg09423875	-2.96685
cg09431264	-2.72797
cg09433064	-0.886793
cg09434534	-3.9065
cg09435190	-0.857741
cg09436924	-4.86739
cg09441172	0.0372486
cg09441217	-0.811521
cg09442740	-1.22033
cg09451413	-4.55994
cg09459808	-3.15161
cg09466719	-4.61065
cg09467902	-2.05718
cg09472802	-2.58679
cg09472821	-0.704333
cg09474017	-2.39331
cg09475901	0.256355
cg09502339	-0.975127
cg09510339	-3.54872
cg09517010	-2.80709
cg09517075	-5.55791
cg09521872	-2.70803
cg09563311	-3.08221
cg09569347	-4.02077
cg09574618	-1.46128
cg09580249	-4.21992
cg09584711	-5.46001
cg09596027	-2.39816
cg09597022	-5.42897
cg09597335	-2.48343
cg09600088	-3.16141
cg09606074	-2.38631
cg09606470	-4.56734
cg09607210	-2.31527
cg09613161	5.57427
cg09621603	-2.86162
cg09632256	-2.93311
cg09638735	-4.01549
cg09647033	0.377027
cg09663494	-1.64611
cg09664442	3.85815
cg09672233	-1.17409
cg09678939	-2.72538
cg09698960	-1.80397
cg09715906	-7.1578
cg09717774	-1.36961
cg09720117	-2.52969
cg09729848	0.595109
cg09731124	0.136823
cg09750772	-3.06185
cg09771429	-3.69847
cg09778634	0.475812
cg09786329	-5.81776
cg09794680	-1.0197
cg09796913	-1.16155
cg09805709	-1.50726
cg09805953	-2.16025
cg09814877	-3.89411
cg09819083	-1.66131
cg09833737	0.508683
cg09836921	-1.99884
cg09837481	-0.932413
cg09841052	-0.951342
cg09848749	-1.86694
cg09858107	-2.20544
cg09864211	-3.60648
cg09881842	-1.65482
cg09891761	-1.62772
cg09896093	-1.64882
cg09896814	-3.87375
cg09907495	-0.567836
cg09916765	-1.97078
cg09928672	-2.19066
cg09934345	-3.30509
cg09946623	-1.57379
cg09967329	-0.75506
cg10005270	-3.29838
cg10007211	-3.15367
cg10014874	-1.32618
cg10016358	-1.64915
cg10020883	-4.45228
cg10024876	3.25132
cg10034259	-1.95905
cg10043155	-4.55903
cg10046101	-6.16583
cg10077468	-1.03596
cg10081681	-0.124275
cg10087172	0.767285
cg10105137	-1.43513
cg10107241	-2.52802
cg10112138	-2.32102
cg10112440	-1.85856
cg10117369	-5.65094
cg10126903	-1.28447
cg10130008	-2.45555
cg10133165	-4.42171
cg10137597	-1.82798
cg10146514	-2.26149
cg10161194	-2.67307
cg10164456	-2.74231
cg10167785	-0.130964
cg10177528	-0.584306
cg10196103	0.161607
cg10212621	-3.12571
cg10227572	-4.06035
cg10235251	-1.92297
cg10237854	-2.57323
cg10249828	-1.30971
cg10250660	-4.1075
cg10256733	-3.11141
cg10259231	-2.28194
cg10271272	-0.229901
cg10277798	-2.01905
cg10283921	-1.59568
cg10284266	-2.58851
cg10285420	-3.04886
cg10298898	-2.17694
cg10317145	-3.5371
cg10325600	-2.92264
cg10329001	-2.92787
cg10340671	5.58671
cg10355893	0.109353
cg10356463	-0.105293
cg10363828	-1.84779
cg10363951	2.20975
cg10365312	-3.83239
cg10377270	0.224574
cg10380585	-1.87005
cg10387543	1.65653
cg10390211	-3.22447
cg10397941	3.10745
cg10399210	-1.66835
cg10399598	-1.73844
cg10402521	-3.77551
cg10405889	-1.05051
cg10409560	-3.42008
cg10416503	-3.71578
cg10430963	0.159692
cg10430994	-1.80793
cg10433005	-1.16918
cg10435245	-0.0482629
cg10436631	-3.83883
cg10441244	-3.92741
cg10449466	-1.77389
cg10459425	-1.618
cg10463626	-0.248896
cg10475014	-2.36411
cg10475953	-2.15978
cg10487724	0.561384
cg10489284	-3.41334
cg10489428	-0.221925
cg10495997	0.171044
cg10500474	0.779436
cg10513302	-0.502808
cg10515274	-2.29598
cg10516089	-3.97111
cg10520405	-1.27844
cg10520924	-0.570113
cg10527280	-2.79953
cg10529470	-4.70835
cg10530336	-0.163192
cg10530767	-2.47587
cg10532540	-0.538069
cg10534672	-2.30452
cg10540513	-1.47661
cg10544611	-1.5318
cg10562576	-2.7722
cg10567498	-1.44022
cg10582687	-2.73234
cg10585379	-2.65453
cg10590925	-2.08968
cg10593028	-5.4142
cg10593292	-2.6881
cg10596483	-0.957489
cg10600889	-4.25427
cg10610342	-2.82699
cg10615580	0.135565
cg10622586	-2.5132
cg10624914	-2.17442
cg10652641	-1.53231
cg10658515	-4.61667
cg10664112	-0.799784
cg10671235	-4.61126
cg10682803	-1.95471
cg10687163	-2.70374
cg10690747	-2.56109
cg10709645	-0.42298
cg10714415	-2.71806
cg10723306	-2.31343
cg10726706	-4.25092
cg10731735	-3.38068
cg10751592	-2.34946
cg10769099	-2.17559
cg10773601	-2.68684
cg10777495	-2.54002
cg10782019	1.5654
cg10784090	-3.34009
cg10787409	-2.6124
cg10800250	-4.79829
cg10822665	-0.819142
cg10823804	-0.24743
cg10824063	4.36583
cg10824705	0.0366466
cg10832005	4.87695
cg10847915	-2.54829
cg10858791	-3.08266
cg10874613	-0.904934
cg10885956	-4.36012
cg10899175	0.345492
cg10900202	-0.114707
cg10901968	-1.12655
cg10904867	-1.78595
cg10921709	1.27471
cg10923018	-1.89812
cg10925082	-2.3971
cg10936323	-2.8261
cg10937529	-1.30043
cg10938586	-4.8975
cg10942169	3.63909
cg10946576	-1.8357
cg10949753	-2.8508
cg10954062	-1.11909
cg10964472	-3.06629
cg11001712	-2.56378
cg11010909	-2.71203
cg11015241	-1.77935
cg11015305	-2.75032
cg11019014	-0.304981
cg11029623	-2.21127
cg11031714	-2.14988
cg11050482	-3.31003
cg11053273	-0.144021
cg11053763	-3.11851
cg11059198	-1.74806
cg11087774	-1.04276
cg11093373	-1.09912
cg11097968	-2.83479
cg11099899	-1.89857
cg11102019	-1.40478
cg11106060	-1.94298
cg11113753	-2.49378
cg11115702	-1.26479
cg11131549	-2.86151
cg11149971	-2.72087
cg11152057	-2.96362
cg11161873	0.0798322
cg11174927	-2.6467
cg11191766	-2.29007
cg11193431	-1.72874
cg11194118	-3.37248
cg11195733	-2.42125
cg11196437	-1.88922
cg11217367	-1.12039
cg11220744	-1.19573
cg11223196	-4.28433
cg11225849	-1.72828
cg11226105	1.05967
cg11226913	-3.24692
cg11240908	-1.4844
cg11245145	-4.3343
cg11245681	-3.30366
cg11249129	-1.7622
cg11254573	-1.60082
cg11255265	3.39907
cg11257728	-0.911473
cg11259192	-1.84709
cg11260259	-1.71316
cg11261779	-1.24097
cg11264584	-4.14102
cg11268225	-3.05473
cg11273706	-3.35669
cg11291802	-4.56345
cg11316784	-1.6946
cg11320517	-0.119966
cg11323433	-0.118663
cg11328885	-3.82751
cg11340770	0.122964
cg11360507	0.162244
cg11370259	-0.478582
cg11382945	-3.89879
cg11384427	-2.78474
cg11386390	-4.1275
cg11389866	-0.574585
cg11389889	-1.80977
cg11397301	-1.98409
cg11411912	-2.8927
cg11412527	0.431155
cg11417025	-1.86551
cg11429485	-4.58008
cg11431261	-2.55419
cg11432797	-1.81008
cg11435239	-0.488831
cg11447163	-5.03647
cg11459591	-0.935734
cg11461808	-3.05253
cg11463427	-3.76353
cg11464216	-3.84866
cg11467331	0.291174
cg11467440	-1.26696
cg11469778	-1.43588
cg11474317	-1.41621
cg11477414	-3.63911
cg11479035	-2.03925
cg11489779	-2.64287
cg11493661	-1.91606
cg11499386	-0.684073
cg11528914	-1.84293
cg11534680	-2.08109
cg11540735	1.42297
cg11542165	-1.60475
cg11548083	-3.46572
cg11554421	-0.16174
cg11558856	-1.20466
cg11563399	-3.01918
cg11565042	0.00407411
cg11573093	-1.55717
cg11576405	-1.19299
cg11579681	-1.86268
cg11586890	-1.55268
cg11591520	-3.42631
cg11606412	-1.98517
cg11609556	0.1402
cg11620238	5.24443
cg11623339	-4.00222
cg11626007	-1.77496
cg11628880	-3.19888
cg11630135	-3.89737
cg11649654	-1.38477
cg11664818	0.625828
cg11670411	-2.26756
cg11671121	-2.21276
cg11673566	-0.546356
cg11679014	2.64895
cg11682724	-1.82954
cg11689323	-0.59424
cg11691504	0.231747
cg11697111	-3.39215
cg11700230	-3.16459
cg11718970	-2.12891
cg11728787	-0.734604
cg11753771	-3.6885
cg11773537	0.662866
cg11794213	-1.16149
cg11801011	-1.39004
cg11801282	-0.581017
cg11811869	-0.291294
cg11817533	-1.49769
cg11834106	-3.7314
cg11836829	-1.91763
cg11840968	-3.92554
cg11842783	0.0643336
cg11843299	-0.982624
cg11852218	-0.41441
cg11854860	-1.34492
cg11867552	-1.73414
cg11870956	-3.01882
cg11872776	-0.948432
cg11877254	-0.542063
cg11879620	-2.37979
cg11884933	-1.75562
cg11902728	-2.9364
cg11904435	-4.4077
cg11929780	-2.88206
cg11930820	-1.5103
cg11945507	-3.75135
cg11945929	-4.01531
cg11946165	-3.31215
cg11949831	-0.508744
cg11956467	-0.783925
cg11959266	-1.05848
cg11965881	-4.51942
cg11967765	0.277866
cg11968366	-0.549819
cg11971344	-1.36566
cg11984608	-1.84753
cg11988321	0.230624
cg11993925	-1.31313
cg11997708	-2.16936
cg12001148	-1.85751
cg12014547	1.64093
cg12022621	-1.42148
cg12031031	-4.26682
cg12033779	-3.23855
cg12053296	-1.55811
cg12065986	-2.3798
cg12071328	5.96282
cg12076953	3.74692
cg12091756	-3.11206
cg12096720	-3.54558
cg12096894	-4.12727
cg12102151	-1.34406
cg12104133	-2.80736
cg12117920	-1.21311
cg12128828	-0.256897
cg12134349	-2.39985
cg12134633	-1.53131
cg12144338	-1.92169
cg12150448	-2.20595
cg12159314	-4.57203
cg12161743	-5.23003
cg12170314	-2.89246
cg12186219	-1.91961
cg12199100	-2.59108
cg12220271	-4.39168
cg12228268	-3.51566
cg12234287	-2.72142
cg12253698	-1.73557
cg12257502	-2.3172
cg12267557	-0.329576
cg12278179	-1.80502
cg12286154	-1.48814
cg12288551	-5.02811
cg12298445	-1.99363
cg12298955	-3.13121
cg12320522	-2.83155
cg12325455	3.1552
cg12332902	0.391707
cg12335447	-0.723946
cg12339134	-0.843896
cg12355162	-1.03546
cg12355180	-1.57005
cg12379720	2.55094
cg12385467	-1.62267
cg12389423	0.148701
cg12389461	-1.22972
cg12402033	-4.35703
cg12405258	-3.96612
cg12410939	-4.71491
cg12426313	-1.43262
cg12426653	-1.84239
cg12446143	-3.55911
cg12453687	-3.09506
cg12472351	-1.89326
cg12474460	-0.12276
cg12474638	-0.127854
cg12476061	-1.81987
cg12510535	3.59196
cg12544923	-4.56368
cg12550524	-1.28602
cg12565057	-2.3047
cg12568161	-0.740174
cg12569960	-1.40684
cg12578575	-2.41827
cg12586050	-2.96178
cg12591090	-2.34545
cg12601856	-0.679798
cg12609140	-1.75706
cg12611449	-3.46399
cg12618806	-3.89905
cg12630401	-2.76913
cg12630461	-0.981017
cg12631105	-1.12339
cg12647478	-4.03454
cg12654045	-3.67555
cg12664173	-1.51285
cg12664633	0.00483848
cg12665504	3.26425
cg12668043	-4.07409
cg12674918	-2.35722
cg12683533	-1.84436
cg12712768	-1.85482
cg12744031	-3.68973
cg12778183	-4.02299
cg12785251	-0.0783609
cg12806347	-3.03157
cg12811942	-4.23869
cg12823233	-3.08956
cg12828075	-2.85473
cg12828354	-1.8815
cg12841872	-1.6732
cg12852468	-2.26169
cg12854020	-0.979842
cg12862231	-3.38885
cg12875775	-2.59522
cg12884128	0.454985
cg12889240	-1.92333
cg12894947	-0.189962
cg12910906	-1.81808
cg12915036	-1.33219
cg12919469	-2.06437
cg12924525	-3.24524
cg12924825	-0.204924
cg12936804	-2.08245
cg12939547	0.306783
cg12939648	-1.76963
cg12939918	0.130345
cg12944343	-2.28585
cg12948240	-1.58656
cg12950816	-2.04957
cg12950995	-1.13129
cg12954512	-3.61733
cg12959275	-2.83959
cg12975324	-1.61297
cg12982053	-3.38376
cg12982543	0.280444
cg12988118	-3.40792
cg12988534	8.84931
cg12990093	-2.45683
cg13002712	-1.37145
cg13010483	-3.63676
cg13026032	0.218063
cg13028841	3.19201
cg13036546	-4.5546
cg13046832	0.348437
cg13050895	-4.4919
cg13053396	-0.519287
cg13054883	-0.067049
cg13059373	-4.70786
cg13063202	0.300262
cg13068216	-2.22755
cg13074173	-1.72001
cg13120258	-1.40609
cg13120986	-0.699631
cg13136556	-3.0839
cg13136655	-4.26057
cg13147664	-2.47016
cg13150632	-1.95569
cg13151171	-5.32955
cg13151409	-5.95779
cg13152535	-1.83879
cg13160221	-2.9002
cg13164238	-2.40464
cg13172732	-4.69847
cg13176235	-2.15131
cg13179716	-1.21817
cg13198500	-1.37959
cg13198709	-1.46083
cg13206076	0.198157
cg13216020	-4.50427
cg13217322	0.457855
cg13217878	-0.511988
cg13221899	-1.16246
cg13225750	0.359301
cg13237021	-3.73268
cg13247468	-2.58537
cg13260474	-3.01393
cg13263474	-1.26321
cg13272108	-1.88932
cg13279019	-1.93151
cg13279955	0.47713
cg13281581	-1.47937
cg13302832	-6.07246
cg13316407	-1.08397
cg13320626	0.019618
cg13327384	-4.3383
cg13327466	-0.767156
cg13330018	-0.546597
cg13335388	-2.72937
cg13347255	-0.349876
cg13355574	-1.01148
cg13355874	-7.10974
cg13365901	-0.0376714
cg13373351	0.917228
cg13375905	-4.71325
cg13380103	-0.0136636
cg13387529	-3.91864
cg13387924	0.00864763
cg13406339	-2.89653
cg13409645	-1.43263
cg13433263	-0.891854
cg13442586	1.75544
cg13442689	-0.666006
cg13444775	-3.38475
cg13446340	-3.19015
cg13447099	-0.531823
cg13447933	-1.58919
cg13448978	-3.35985
cg13466970	4.05073
cg13468092	-2.35909
cg13470920	0.982105
cg13472359	-1.41581
cg13480623	-0.904125
cg13486675	-1.87526
cg13497187	-0.980832
cg13501263	-2.08811
cg13523819	-3.67991
cg13524857	-0.107198
cg13525071	-1.40613
cg13531169	-2.44036
cg13533151	1.7932
cg13540981	-3.03796
cg13550670	-5.79035
cg13553343	-0.241102
cg13560072	-1.76603
cg13561477	2.56827
cg13569877	-5.00507
cg13578652	-1.75262
cg13580755	-4.37929
cg13583895	-2.24244
cg13586115	-1.69196
cg13588517	-1.86378
cg13602816	-0.204376
cg13603551	-1.16414
cg13605526	0.0582542
cg13612241	-2.90203
cg13630339	-2.48489
cg13634864	0.363621
cg13647410	-5.11088
cg13647725	0.177408
cg13648848	-1.2763
cg13662093	4.19498
cg13665850	-0.825183
cg13666392	-3.73976
cg13667389	-3.11284
cg13675958	-2.88485
cg13682187	-3.76806
cg13685139	-3.19617
cg13697968	-1.87131
cg13705956	-2.55035
cg13711543	-4.68587
cg13739666	-1.90438
cg13767135	-4.46316
cg13768174	4.89759
cg13771579	0.336567
cg13781408	-1.75484
cg13789737	-0.266526
cg13800745	-2.81845
cg13808071	-2.17052
cg13817395	-1.60212
cg13842293	-2.27482
cg13853141	-0.783037
cg13856405	-2.65009
cg13864794	-2.62114
cg13867248	0.769449
cg13887029	-1.76697
cg13892257	-2.92946
cg13897416	1.64053
cg13905264	-0.845386
cg13906646	-0.200529
cg13913407	-1.71014
cg13914531	0.247732
cg13916953	0.767034
cg13923696	-0.26062
cg13927228	1.85194
cg13930220	-2.03951
cg13933921	0.213084
cg13936972	-1.54626
cg13946191	-0.915373
cg13948392	-3.48824
cg13949968	-4.42487
cg13962835	-1.83899
cg13974084	2.55249
cg13976683	-2.9888
cg13983941	-2.51044
cg13988440	-2.46528
cg13997645	-0.957706
cg13998850	-7.62058
cg14001035	-2.88653
cg14006181	-2.3409
cg14031100	0.182417
cg14050395	0.476087
cg14055996	-0.374357
cg14064268	-2.82091
cg14066645	-4.72659
cg14073986	-1.90284
cg14088811	-1.99736
cg14091954	6.25154
cg14101500	-3.79105
cg14102434	-2.62609
cg14109844	-0.395378
cg14111974	-4.51635
cg14135638	-4.98817
cg14140118	-1.88746
cg14142627	-4.13327
cg14144469	-3.37404
cg14151464	-0.599157
cg14161729	-1.96294
cg14165193	-1.58028
cg14166832	-3.34292
cg14180581	-1.78457
cg14181947	-0.427805
cg14185324	-2.16535
cg14191161	-1.53653
cg14193156	-3.93496
cg14198860	-2.39615
cg14199833	-5.56458
cg14208573	-1.9353
cg14209854	-3.45499
cg14219236	-0.873715
cg14220262	-2.58915
cg14225483	-1.71039
cg14235398	-1.9388
cg14264496	-5.9518
cg14268632	2.75709
cg14283447	-1.92599
cg14286274	1.62923
cg14302760	-1.89854
cg14306709	0.686366
cg14311471	1.7444
cg14317001	-0.403715
cg14319773	-2.13696
cg14335783	-2.86983
cg14335859	-1.36
cg14337300	-0.446828
cg14342973	-0.690677
cg14350161	-3.80984
cg14350312	-1.62534
cg14352983	6.17531
cg14373257	-3.44783
cg14377051	-1.63234
cg14389454	-1.13782
cg14390322	0.534993
cg14399930	-2.37118
cg14409941	3.53867
[truncated: 1,665 more rows]

## Sheet: 026
probe_id	median_change
cg00026703	4.46777
cg00078456	1.50765
cg00111823	1.88492
cg00163920	3.28972
cg00181054	-2.45528
cg00208912	-1.86604
cg00210271	4.66808
cg00224312	-1.9594
cg00242039	0.302944
cg00263700	3.32441
cg00277030	0.415934
cg00284152	3.72482
cg00392003	1.44434
cg00394830	-0.884477
cg00494735	-0.956864
cg00526316	-1.91226
cg00573338	1.79252
cg00594408	-0.748854
cg00594866	-0.794333
cg00604202	-1.30078
cg00618054	1.65953
cg00622395	1.42473
cg00677986	3.47013
cg00720193	-0.891445
cg00849267	5.00963
cg00855483	-0.607456
cg00864867	2.64141
cg00892324	-2.93393
cg00931124	2.11202
cg00938517	-0.957851
cg00993118	-2.46428
cg01118078	-1.77452
cg01156550	-1.06613
cg01188936	4.2185
cg01218180	-0.244772
cg01289343	2.58022
cg01318702	-0.133138
cg01328461	4.11126
cg01484296	-1.11692
cg01522243	0.90962
cg01563555	-2.84945
cg01621974	4.75269
cg01665559	5.17334
cg01667892	3.31074
cg01670306	2.079
cg01692639	-4.5144
cg01752881	0.445173
cg01758314	-2.22948
cg01763754	-2.49
cg01774541	2.90703
cg01778190	1.05891
cg01806051	-0.70075
cg01822585	-0.28175
cg01828753	-1.35559
cg01834776	3.32159
cg01883662	3.37924
cg01945810	0.974098
cg01957330	3.67982
cg01986275	2.36664
cg02014853	-3.40382
cg02124912	-0.944683
cg02200944	1.28865
cg02273477	1.37173
cg02283643	-1.43321
cg02322879	0.856067
cg02344926	-0.946701
cg02380531	-5.77484
cg02390103	3.26346
cg02444433	4.95074
cg02488409	2.43892
cg02543772	-2.62272
cg02675414	2.36012
cg02696201	0.836245
cg02705573	-1.11772
cg02711801	0.697474
cg02751839	-3.85472
cg02757970	4.24413
cg02803508	4.12984
cg02815135	2.40683
cg02825497	-0.156959
cg02848961	-2.52713
cg02896757	0.796169
cg02918224	-1.22613
cg02964724	1.8107
cg02978297	1.88196
cg03020006	2.21948
cg03110368	3.10086
cg03138091	1.23572
cg03199938	4.21986
cg03228980	3.33273
cg03244494	4.02716
cg03293802	-0.398707
cg03304654	3.75885
cg03306615	1.93838
cg03381047	-0.875219
cg03414202	-2.75499
cg03427058	0.89094
cg03456212	1.12669
cg03532274	1.9968
cg03575512	4.99307
cg03626672	-3.61952
cg03632704	-5.30086
cg03669949	3.49842
cg03717750	-0.954479
cg03813168	1.22723
cg03850711	2.91417
cg03870497	0.309442
cg03874471	0.259897
cg03877420	3.23212
cg03933279	-2.23883
cg03956606	1.23848
cg03977237	-1.49449
cg03987837	2.53411
cg03996020	2.59245
cg04060366	-2.27241
cg04063230	0.36031
cg04094885	0.876071
cg04230699	-1.20687
cg04274978	4.36385
cg04282419	0.714554
cg04354564	2.26959
cg04393855	-2.80673
cg04411541	3.65646
cg04417028	2.67209
cg04454576	-1.22185
cg04508649	1.04228
cg04514469	1.88067
cg04517274	0.893515
cg04521957	3.75307
cg04618171	1.19645
cg04619509	3.39255
cg04629898	1.3455
cg04648402	0.780399
cg04652441	-2.55021
cg04743650	-4.30547
cg04818919	-0.195471
cg04819775	-0.471977
cg04842215	4.48255
cg04845579	-2.72282
cg04936932	1.62979
cg04946274	1.11645
cg04974587	4.46525
cg05006384	3.25127
cg05047276	0.186591
cg05063298	2.46771
cg05066835	-2.87624
cg05068202	0.971055
cg05170515	3.58081
cg05179993	1.60571
cg05309948	6.47124
cg05330360	2.18973
cg05354921	1.06784
cg05385453	3.58005
cg05404701	4.51621
cg05445326	1.00238
cg05485663	1.79242
cg05507832	-0.685727
cg05508408	1.71695
cg05546045	0.909536
cg05556202	-0.0360643
cg05642789	1.49591
cg05706582	-0.871762
cg05723953	1.19479
cg05760053	3.58832
cg05826429	-0.829921
cg05876623	5.0647
cg05907917	0.439282
cg05929132	-0.363532
cg05955210	2.41384
cg05966978	-2.99178
cg06065891	1.70115
cg06078334	-0.964026
cg06114320	2.96703
cg06160397	-2.75594
cg06220521	-1.873
cg06263495	1.95315
cg06272038	4.94372
cg06347739	0.769936
cg06458745	1.49643
cg06483432	-0.255216
cg06561366	-2.2518
cg06577272	2.90793
cg06604589	2.57316
cg06613286	-2.852
cg06616678	-1.12904
cg06623151	-0.133792
cg06638129	3.49948
cg06638568	0.607154
cg06691520	-3.56344
cg06731942	-0.92456
cg06795643	1.49465
cg06807960	2.18096
cg06815153	3.74978
cg06826457	-4.48335
cg06875227	-2.03547
cg06876311	1.63744
cg06928021	3.16116
cg06928346	-0.199852
cg06975067	-2.43914
cg07011961	2.75958
cg07051728	-0.2905
cg07054292	0.872662
cg07073960	-3.62417
cg07093547	2.15079
cg07106651	-0.396855
cg07117674	5.12253
cg07209071	2.76658
cg07258300	3.16256
cg07333715	1.75312
cg07391831	-1.32417
cg07474494	2.09835
cg07482795	-0.313083
cg07507686	-2.13548
cg07525299	-0.943147
cg07607752	3.2814
cg07669403	2.50916
cg07694263	1.12032
cg07702526	1.3759
cg07743742	3.73863
cg07793207	-2.89751
cg07840529	-0.147704
cg07997936	-1.65573
cg08000065	2.12753
cg08012199	2.95845
cg08093277	-1.66557
cg08112137	1.08625
cg08124399	3.23393
cg08129759	-1.71194
cg08154871	0.96885
cg08190450	2.13423
cg08237401	2.05054
cg08242032	-2.71903
cg08277314	-1.0772
cg08363074	0.499987
cg08366845	-3.17069
cg08393516	0.369321
cg08396707	0.722872
cg08450404	3.09542
cg08538468	0.537238
cg08555556	1.69499
cg08617982	0.230266
cg08648727	2.50632
cg08744312	2.34928
cg08774452	-4.19195
cg08798726	4.15894
cg08848172	1.20873
cg08862148	-2.38614
cg09073508	2.0229
cg09083108	4.1048
cg09086442	-2.6591
cg09109477	-2.02664
cg09166973	3.03158
cg09174233	0.299994
cg09196059	-2.21602
cg09199330	2.19843
cg09274418	1.16285
cg09394785	-2.86468
cg09404522	2.09888
cg09418283	5.57018
cg09469318	1.12471
cg09531044	1.87686
cg09577425	0.0633451
cg09582042	-4.08079
cg09597070	5.06261
cg09623400	4.03675
cg09634887	2.87362
cg09639931	2.47341
cg09664373	4.32283
cg09686010	2.83997
cg09705592	-1.99178
cg09834370	0.0659535
cg09842667	-0.147913
cg09884341	-0.0622133
cg09894698	6.96088
cg09912768	-1.42283
cg09973986	1.0508
cg09989644	-0.467249
cg10016332	3.11809
cg10087973	2.73274
cg10092257	2.04875
cg10124491	-2.6367
cg10133929	3.22378
cg10201167	-3.89986
cg10290276	3.82945
cg10329434	-2.8005
cg10331082	-2.98527
cg10332369	1.35855
cg10526374	2.50516
cg10654390	0.824834
cg10693780	6.36242
cg10725952	0.243576
cg10759590	2.45604
cg10856306	4.11682
cg10859966	3.74891
cg10932874	2.10439
cg10985347	2.64549
cg10988368	-3.57064
cg11052143	4.73729
cg11065154	1.45197
cg11124677	-0.050064
cg11168006	1.25673
cg11373604	4.08914
cg11411707	-1.83957
cg11416243	-3.40095
cg11419064	3.75633
cg11422851	1.39182
cg11428294	1.11586
cg11536196	-3.79925
cg11549417	0.374909
cg11560280	4.52793
cg11623861	0.144935
cg11626785	0.281254
cg11644479	2.98752
cg11645417	1.87829
cg11661263	-0.836906
cg11718806	-2.54102
cg11788523	2.63011
cg11800675	3.04412
cg11807318	-3.53321
cg11837267	2.52778
cg11910223	-2.21699
cg11935854	9.27881
cg11945895	-3.6112
cg11998703	3.82755
cg12018485	-1.28043
cg12045875	4.86858
cg12169977	-1.64473
cg12181083	-3.30469
cg12260435	1.0031
cg12302830	-0.590876
cg12392684	-0.693213
cg12415575	-1.80707
cg12499235	-1.33611
cg12623088	-2.67303
cg12639834	0.790724
cg12739584	-3.34069
cg12831866	3.17053
cg12835689	2.11234
cg12961842	5.0135
cg12983442	1.78198
cg12984905	-3.04676
cg13116946	0.747055
cg13181745	1.73606
cg13197732	0.520493
cg13203811	1.72171
cg13265524	1.05057
cg13298466	-2.47498
cg13300939	-2.51798
cg13314965	1.59353
cg13330341	-0.482168
cg13344757	-4.85859
cg13349472	4.76565
cg13393782	1.59232
cg13417420	-3.57177
cg13430552	2.13182
cg13522151	0.854647
cg13531446	-1.28097
cg13557773	2.20778
cg13561879	5.8263
cg13605674	2.56391
cg13610769	-2.09808
cg13668618	4.1898
cg13697193	-2.70384
cg13762320	3.05881
cg13763783	-0.655918
cg13783152	0.815646
cg13848359	1.30592
cg13858227	-2.67669
cg13867963	0.951751
cg13928759	-3.19086
cg13930892	3.00069
cg13982529	-1.2495
cg13990559	-1.67286
cg13990596	-1.34388
cg13992911	1.48672
cg14003621	-4.17253
cg14014225	1.05043
cg14043562	-2.66292
cg14062119	3.22235
cg14121785	-2.33244
cg14129887	2.88698
cg14213394	2.57164
cg14242106	0.937921
cg14249227	-4.34338
cg14308479	0.035426
cg14322681	3.75288
cg14410102	1.02638
cg14434213	2.63171
cg14434870	-4.34206
cg14554846	-1.88331
cg14556503	2.50682
cg14585353	1.60131
cg14652031	3.63933
cg14668747	-1.56012
cg14729148	-0.750985
cg14732998	3.15503
cg14767529	-0.830681
cg14860219	-2.77205
cg14935271	3.67255
cg14935551	0.932627
cg14966901	1.47656
cg15035273	-1.6514
cg15044270	-0.0882216
cg15060012	4.36023
cg15070011	-3.44269
cg15096829	-2.0337
cg15107346	3.37464
cg15139588	4.89252
cg15198335	-0.147385
cg15248935	2.06196
cg15301282	0.825399
cg15316734	-2.37292
cg15343461	2.93502
cg15351186	-3.34809
cg15385139	-2.71556
cg15477845	-1.23013
cg15539805	-2.41567
cg15575683	-1.56802
cg15636887	0.582115
cg15684962	-2.42118
cg15780361	0.196871
cg15780363	1.28228
cg15790820	5.93814
cg15816363	0.589924
cg15835620	-2.31905
cg15855970	-2.66774
cg15907473	-3.40535
cg15936068	4.47057
cg15967304	-1.87268
cg16044372	0.775699
cg16055026	-0.695194
cg16075951	2.67744
cg16091995	1.21817
cg16105380	-1.49286
cg16143502	2.2899
cg16151151	-2.70085
cg16162172	2.257
cg16205525	2.10018
cg16210827	0.794168
cg16249340	1.54853
cg16257215	-5.20271
cg16310491	-5.49406
cg16503797	1.08578
cg16505056	-4.57312
cg16522484	2.31691
cg16605424	-2.82876
cg16615451	3.64749
cg16626405	-1.08518
cg16638920	-2.3273
cg16639145	1.19894
cg16667814	2.75029
cg16686451	-0.745156
cg16746864	1.80807
cg16793866	2.30268
cg16799188	-0.895535
cg16806913	2.17612
cg16810054	-2.55966
cg16814576	2.51564
cg16847695	-1.31511
cg16893174	-0.0589061
cg16898391	-4.4231
cg16928454	0.0863091
cg16957921	3.05244
cg16970877	4.81844
cg17073273	-2.97631
cg17122213	3.50222
cg17188169	3.89262
cg17219660	-2.12659
cg17226348	-3.92719
cg17259358	-3.82784
cg17281677	-5.47443
cg17283506	-1.55882
cg17303756	-4.63034
cg17323982	0.933968
cg17332326	3.03213
cg17398595	0.395621
cg17423135	-2.06947
cg17426084	-1.0222
cg17486066	1.70318
cg17486097	6.39752
cg17510206	-0.178983
cg17523124	0.625507
cg17528648	4.70417
cg17566342	1.3285
cg17582558	2.68124
cg17621054	4.16762
cg17646030	2.22972
cg17652818	-1.28658
cg17739841	1.82585
cg17842912	-2.28629
cg17889086	2.24461
cg17891820	4.24611
cg17940908	3.05449
cg17966560	-2.33712
cg17977409	5.25272
cg18007837	-0.87104
cg18048953	-3.39541
cg18154014	3.66224
cg18327772	1.40059
cg18344922	-1.67587
cg18348654	0.80748
cg18412871	-1.61504
cg18413285	-0.725201
cg18485844	1.3657
cg18492219	4.63308
cg18616925	3.21366
cg18673377	3.9787
cg18754954	-0.757842
cg18759102	2.36784
cg18780491	-0.810325
cg18801579	0.550685
cg18803655	-1.72408
cg18827602	0.152247
cg18836493	6.78745
cg18848276	-1.37284
cg18852096	2.73901
cg18892808	-2.58635
cg18894648	-0.0458716
cg19058526	-2.8542
cg19063516	0.393379
cg19071989	-1.99957
cg19118904	2.19746
cg19284039	1.50037
cg19360852	-2.86321
cg19459876	1.55203
cg19584674	2.42348
cg19609242	3.15349
cg19614504	3.13045
cg19643318	-3.56411
cg19654195	3.06296
cg19669385	3.84463
cg19693494	-2.38086
cg19758087	2.72649
cg19798368	0.359642
cg19837938	2.86965
cg19849544	1.21617
cg19857361	0.636295
cg19870370	2.07111
cg19881032	0.851527
cg19956147	1.38233
cg20065630	-2.42284
cg20090869	-0.743362
cg20146594	-0.00013627
cg20195763	-2.15321
cg20208952	3.16911
cg20320717	-0.386686
cg20358187	-1.42327
cg20392764	0.176297
cg20422417	0.835557
cg20433275	-2.38179
cg20439022	2.55177
cg20472745	4.03797
cg20525461	-1.97159
cg20631472	0.0311239
cg20709948	4.04678
cg20764358	0.878673
cg20791712	0.620701
cg20800086	-2.7876
cg20827659	2.65721
cg20890313	3.81041
cg20912770	2.92494
cg20947113	3.97153
cg20956278	1.32926
cg20997792	-0.926
cg21055888	0.206261
cg21063716	0.592508
cg21090033	1.71122
cg21090075	1.08864
cg21100518	-1.56867
cg21120786	3.07006
cg21121336	-1.61109
cg21146268	-0.869392
cg21223353	2.99816
cg21235532	2.12794
cg21238257	2.78011
cg21272034	1.90735
cg21275135	-3.83522
cg21297493	-2.34375
cg21300072	-1.88774
cg21365566	4.3311
cg21440776	-5.60372
cg21444693	3.60414
cg21475544	-1.15722
cg21484573	0.192708
cg21616051	2.66171
cg21628539	2.40431
cg21638533	-3.31217
cg21660683	-4.63592
cg21686812	0.196318
cg21708867	1.42057
cg21759268	2.78804
cg21776568	-0.491514
cg21838477	-1.38491
cg21845080	2.36085
cg21855830	2.44279
cg21865387	-0.807465
cg21929600	2.62196
cg21966075	-1.69996
cg22036966	-2.61417
cg22068068	1.63012
cg22079902	2.3487
cg22180298	2.01298
cg22199080	-0.279801
cg22239958	0.833025
cg22346124	0.09712
cg22353551	-2.33627
cg22393213	-0.748582
cg22434506	-2.22284
cg22473846	1.2173
cg22474314	0.0783261
cg22496559	2.12239
cg22505898	2.26093
cg22512208	-2.25135
cg22576361	0.157485
cg22599122	2.48999
cg22603366	2.20925
cg22606564	-2.83624
cg22667208	3.39766
cg22722891	2.16643
cg22733135	-3.57986
cg22765308	-2.86597
cg22778421	-0.52936
cg22820948	1.41277
cg22860172	1.29945
cg22883995	-2.52173
cg22942804	-2.21031
cg22981993	2.16403
cg23015629	2.01707
cg23116684	-2.99446
cg23132774	2.94394
cg23280866	4.51341
cg23296010	1.92441
cg23312375	3.48415
cg23332689	1.78639
cg23347429	-3.75842
cg23370536	2.60899
cg23430652	0.787136
cg23430666	3.01206
cg23458843	1.17241
cg23471777	-3.52614
cg23632529	0.0963827
cg23657185	-1.06046
cg23668028	1.63661
cg23672425	1.67685
cg23706721	1.74992
cg23729277	-0.685915
cg23732781	-1.92815
cg23749637	1.7
cg23765961	1.24249
cg23802491	0.548142
cg23842796	-2.52074
cg23849311	0.162093
cg23893997	3.47675
cg23951198	3.28781
cg23976499	-3.78565
cg24012627	-0.326369
cg24014236	2.75501
cg24034465	2.0245
cg24057514	-0.800792
cg24058566	-2.52851
cg24078985	0.444011
cg24091761	0.852415
cg24106734	-2.96792
cg24353535	0.674982
cg24361162	-0.705356
cg24428232	3.35489
cg24449777	-5.02101
cg24504569	3.19602
cg24554839	2.95463
cg24588375	-0.303999
cg24598087	1.57109
cg24684807	-4.673
cg24800426	1.38485
cg24823101	-1.5991
cg24845679	3.24837
cg25128949	1.65298
cg25151688	-2.15546
cg25254825	-2.83303
cg25333900	1.49188
cg25337414	0.611784
cg25361907	0.872991
cg25383568	0.329979
cg25432738	5.37106
cg25440961	4.80091
cg25459450	-0.681178
cg25462229	1.96333
cg25472135	1.2302
cg25472530	3.12241
cg25687360	4.05335
cg25729445	-1.01512
cg25740925	-1.34479
cg25762679	-1.21399
cg25810484	3.49293
cg25843866	-1.64097
cg25909892	0.932933
cg25915434	0.173883
cg25939785	0.0456344
cg25964791	1.22715
cg26051413	3.871
cg26069037	1.17396
cg26105057	-1.28069
cg26135012	3.15701
cg26191923	-2.65189
cg26204638	-2.10257
cg26256916	-1.27205
cg26257645	-1.55005
cg26265881	-2.2355
cg26316697	-0.940849
cg26334670	-0.6916
cg26355357	2.57767
cg26356061	5.73306
cg26372254	0.538885
cg26374678	1.52914
cg26475085	2.68279
cg26525231	-1.71921
cg26566046	-0.513107
cg26578621	3.40904
cg26612727	3.30685
cg26635759	1.51135
cg26668151	6.19458
cg26671652	0.877067
cg26682994	-2.86334
cg26847756	3.96336
cg26860122	1.81145
cg26872137	0.465172
cg26960322	-5.21015
cg26972969	-2.32103
cg27119904	3.04194
cg27154163	3.04221
cg27183188	-3.48793
cg27186851	-3.50575
cg27220376	-0.94932
cg27252164	3.37159
cg27261494	-0.00805287
cg27299526	-0.638796
cg27313021	-3.19813
cg27360685	-3.0956
cg27367871	-2.34217
cg27420677	0.584203
cg27537164	-1.8292
cg27559224	0.334691

## Sheet: 030
probe_id	median_change
cg00004055	-2.20445
cg00005619	-0.44223
cg00013475	-0.870741
cg00017437	-2.94792
cg00035268	-3.9133
cg00062245	-0.375617
cg00124836	-1.50326
cg00130766	-1.47451
cg00133595	-4.2577
cg00153856	-0.383409
cg00157656	-3.10141
cg00162806	-3.46096
cg00181263	-0.0514189
cg00205889	-2.14781
cg00212979	-2.45181
cg00242936	-3.90454
cg00249584	-4.51991
cg00283792	-2.60078
cg00296121	-2.43835
cg00302521	-0.0645684
cg00304959	-0.106041
cg00310139	-4.28998
cg00332421	-4.95208
cg00347938	-2.06558
cg00358609	-2.98514
cg00370106	-2.25078
cg00376448	-1.98519
cg00391562	-2.08545
cg00397575	-1.10344
cg00400165	-0.94649
cg00400733	-1.12115
cg00406489	-4.08203
cg00443981	-4.59294
cg00449364	-2.07903
cg00456593	-2.9489
cg00476955	-3.02599
cg00488787	-0.327783
cg00493304	-3.90215
cg00496988	-1.99383
cg00508131	-4.43556
cg00508697	-2.8805
cg00520247	0.107264
cg00531453	-6.46632
cg00533182	-2.20189
cg00538726	-1.15179
cg00540850	-1.42554
cg00550214	-2.96167
cg00558215	-1.20756
cg00558749	-0.692511
cg00566208	-1.71532
cg00573165	-2.84598
cg00579402	-0.0623813
cg00589493	0.150051
cg00605270	-1.85434
cg00608276	-1.11507
cg00616965	-2.49019
cg00621943	-4.3793
cg00633771	-0.823052
cg00638020	-2.82174
cg00672622	-1.52099
cg00687122	-1.62147
cg00759652	-1.51123
cg00762185	-2.82149
cg00788739	-1.54878
cg00813890	-1.2571
cg00816182	-1.08976
cg00824584	-1.68052
cg00851377	-4.16233
cg00866690	-4.98388
cg00879667	-2.12255
cg00891836	-1.83562
cg00894757	0.0523945
cg00903242	-1.20388
cg00916854	-2.62758
cg00938453	-2.04518
cg00945276	-0.415036
cg00945862	-2.13133
cg00946245	-2.97494
cg00946992	1.52904
cg00953256	-2.80529
cg00974689	-2.69288
cg00980784	-3.52658
cg01007557	-2.36969
cg01007768	-1.05847
cg01021423	0.739002
cg01080902	-2.41289
cg01082299	-0.998451
cg01085461	-2.06089
cg01089602	-3.11929
cg01142407	-5.12219
cg01142417	-0.738003
cg01155930	-0.719831
cg01162037	-2.3443
cg01165816	-0.143446
cg01189092	-1.44855
cg01197294	-0.834161
cg01200104	-1.98448
cg01202997	-2.19916
cg01214155	-4.24767
cg01222324	-2.30021
cg01246421	-0.488458
cg01254034	-0.212735
cg01262208	-1.83002
cg01262566	-2.05384
cg01262865	-0.991493
cg01284869	-1.9215
cg01295518	-1.43728
cg01304814	-2.03999
cg01323777	-6.12629
cg01326128	0.807507
cg01337515	-0.657733
cg01344518	-1.72115
cg01350440	-2.93858
cg01354167	0.787312
cg01363618	-0.73765
cg01369114	-1.1788
cg01377124	-0.492664
cg01377911	-2.62006
cg01378158	-1.57291
cg01379317	-2.77579
cg01395424	-1.38427
cg01396418	-1.23121
cg01396587	-1.48419
cg01419539	-2.71279
cg01421264	-4.02863
cg01425967	-3.30668
cg01426853	-0.478163
cg01434025	-2.12762
cg01441698	-3.46388
cg01443452	-0.0834419
cg01449995	-3.53683
cg01464761	-0.93294
cg01475503	-1.49072
cg01483119	-2.36672
cg01514487	-2.01146
cg01541198	-3.39283
cg01541581	-0.990775
cg01554970	-1.00138
cg01568228	-4.51218
cg01570957	-0.390679
cg01573807	-1.27227
cg01574694	0.174299
cg01591938	-2.28422
cg01597727	-2.55067
cg01629558	-3.07634
cg01629722	-1.54258
cg01639562	-3.26206
cg01642521	-4.8454
cg01648237	3.69645
cg01661993	-1.37373
cg01667133	-1.50952
cg01677148	-0.65888
cg01683593	-1.21704
cg01684884	-3.34124
cg01688776	-0.303645
cg01701802	-1.54099
cg01702009	-1.28907
cg01713348	-2.4885
cg01717164	-0.821995
cg01749467	-1.45153
cg01758575	0.467903
cg01761710	-4.87458
cg01765077	-3.17846
cg01770755	-3.46535
cg01794501	-2.77833
cg01806508	-2.02836
cg01807825	-5.32845
cg01809871	-1.96536
cg01819759	-4.29497
cg01864564	-2.77603
cg01874525	-4.36596
cg01907584	-0.759322
cg01919204	-1.94908
cg01928820	-1.44185
cg01934797	-0.206033
cg01938304	0.0175361
cg01942863	-1.97711
cg01958356	-2.0978
cg01961956	-0.770233
cg01963623	-2.4821
cg01966966	-4.49233
cg01969662	-2.06331
cg01979489	-0.696113
cg01980174	-2.87813
cg01998625	-2.43515
cg02002281	-2.26854
cg02013018	-1.31521
cg02027945	-3.93323
cg02055799	-0.0225015
cg02056062	2.30321
cg02071579	-3.83758
cg02081938	-2.25468
cg02089629	-1.55514
cg02093198	-0.253159
cg02111168	-1.01486
cg02122920	-0.676782
cg02128087	-1.11128
cg02146468	-6.31472
cg02157083	-2.2585
cg02159643	-1.79943
cg02169487	-1.80837
cg02172058	-1.1893
cg02173289	-1.82461
cg02177646	-3.74597
cg02178648	-1.66096
cg02182698	-0.256437
cg02204688	-2.42509
cg02206851	-1.21441
cg02207686	-0.271598
cg02218306	-1.38922
cg02229910	-2.96839
cg02232529	-0.0569151
cg02241055	-1.73831
cg02258444	-0.471169
cg02259232	2.59162
cg02285278	0.385266
cg02288341	-1.79057
cg02294020	-1.50375
cg02295216	-0.571485
cg02303520	-0.126804
cg02307033	-3.46133
cg02311374	-3.89317
cg02311378	-1.31334
cg02315263	1.6664
cg02317400	0.234787
cg02317832	-4.97489
cg02319067	-2.14518
cg02362343	-3.38827
cg02383651	-2.42099
cg02417408	-0.0637511
cg02428506	-2.66679
cg02429393	-0.743058
cg02436616	-0.674324
cg02447627	-1.95844
cg02451730	-0.792619
cg02459090	-0.621331
cg02461502	-2.03466
cg02470625	-0.513366
cg02470697	-5.23204
cg02490847	-1.321
cg02494703	-2.42546
cg02517215	-0.637326
cg02518889	0.264541
cg02531703	-3.1518
cg02532717	-3.22181
cg02566518	-1.70204
cg02600878	-2.41846
cg02602007	-1.9139
cg02622666	-2.05249
cg02623991	-2.10209
cg02640005	-3.94879
cg02640638	-3.28437
cg02645368	-2.55964
cg02649063	-3.91727
cg02662003	-1.21975
cg02666105	-1.39835
cg02670903	-1.71031
cg02672567	-1.85195
cg02700491	-2.64147
cg02705759	-3.70594
cg02715572	-4.79952
cg02723533	-5.80982
cg02741548	-0.928703
cg02761940	-4.91045
cg02768583	-0.525282
cg02769781	-1.32765
cg02770947	-1.18407
cg02793102	-1.22082
cg02829601	-3.03191
cg02836667	-1.04957
cg02839951	-0.600255
cg02841523	2.3776
cg02852544	-0.106114
cg02867763	-3.09156
cg02895995	-0.491413
cg02903755	-2.43437
cg02917917	-0.407311
cg02921617	-0.448718
cg02922035	-2.38403
cg02925800	-0.826366
cg02926769	-1.80735
cg02930200	-1.20973
cg02931001	-0.306308
cg02943148	-2.4511
cg02952008	-2.19077
cg02956255	-2.8284
cg02959637	-2.28379
cg02966453	-0.405947
cg03002848	2.18506
cg03003115	-3.00686
cg03004330	-1.21137
cg03043822	-2.4112
cg03045620	-2.11122
cg03061239	-1.69127
cg03066283	0.53873
cg03078486	-4.0454
cg03080043	-1.71405
cg03083467	-1.62581
cg03119639	0.551246
cg03144851	-2.73345
cg03164112	-0.670113
cg03168587	-2.17681
cg03183004	-3.15965
cg03189678	-2.20353
cg03203646	0.198964
cg03207391	-3.23541
cg03209557	1.27741
cg03228386	-1.23634
cg03238119	-3.47858
cg03238162	-3.74828
cg03250743	-2.04269
cg03251857	-0.771955
cg03252361	-3.37594
cg03255128	-2.35181
cg03256904	-1.65773
cg03259564	-4.228
cg03272292	-0.756332
cg03321503	-1.84102
cg03323597	-2.52867
cg03334839	-1.24617
cg03337084	-1.36836
cg03340701	-1.47274
cg03349935	-1.45002
cg03352287	-2.7039
cg03361068	-0.463658
cg03365190	-0.942329
cg03386903	-1.64402
cg03390211	-3.86209
cg03417884	-3.61241
cg03436206	-0.487794
cg03448532	-1.97404
cg03454225	-5.20556
cg03517528	-2.0586
cg03521370	-1.57884
cg03552663	-0.791121
cg03562414	3.79676
cg03571225	-0.984879
cg03572760	-1.02987
cg03573068	-2.39535
cg03578689	-5.73696
cg03580247	-1.42772
cg03606772	1.78311
cg03628748	-1.46139
cg03629794	-0.464945
cg03654433	-2.61771
cg03663874	-0.844339
cg03667544	-1.77444
cg03668539	-3.57047
cg03721195	-1.58853
cg03729889	-1.51155
cg03735370	-1.83096
cg03737099	-1.64485
cg03750478	-1.9068
cg03755825	-1.16408
cg03758514	0.874115
cg03781084	0.157394
cg03786388	-0.481174
cg03816207	-1.13328
cg03833272	-0.969704
cg03841136	-4.02508
cg03841151	0.000508061
cg03875157	-1.38666
cg03875235	-1.9828
cg03886242	-4.34708
cg03898448	-0.115371
cg03908904	-3.47245
cg03916832	-1.23692
cg03937297	-2.54845
cg03952988	-0.957913
cg03955711	-1.29292
cg03963548	-1.46659
cg03964941	2.04368
cg03970350	-1.53707
cg03973294	-0.376962
cg03998338	-3.90431
cg04001014	-2.02074
cg04006457	-0.504314
cg04014417	-2.39696
cg04024572	-1.57961
cg04025761	-3.08352
cg04034958	-4.12971
cg04036714	-0.438294
cg04037707	-3.2381
cg04081402	-1.49735
cg04088817	-4.00969
cg04103291	-1.63366
cg04109220	-1.80141
cg04113348	-0.465843
cg04113450	-1.63513
cg04119584	-0.0163478
cg04126266	-1.32533
cg04145818	-0.333483
cg04168235	-1.36778
cg04191236	-1.52723
cg04215475	3.45311
cg04228827	-2.42524
cg04231905	-1.88102
cg04234680	-0.410673
cg04235071	-6.61745
cg04235223	-1.22221
cg04237075	-0.443545
cg04246144	-1.93278
cg04256470	-1.72077
cg04278170	0.424505
cg04313968	0.00570213
cg04320760	-2.99596
cg04347264	-1.88275
cg04348558	-2.00921
cg04359602	-3.47773
cg04413853	-2.42517
cg04414629	-1.8007
cg04430124	-1.74789
cg04432599	-2.75371
cg04434328	-0.576009
cg04469880	-0.818795
cg04474832	-3.02603
cg04485489	-6.18786
cg04491828	-0.207097
cg04493899	-1.48519
cg04510919	-5.40115
cg04513311	-1.73648
cg04526883	-0.68268
cg04556868	-1.51497
cg04557357	-2.16941
cg04567302	-3.26942
cg04576684	-0.833105
cg04592728	-3.03562
cg04594986	-0.644732
cg04595163	-3.09897
cg04601090	-4.20934
cg04626675	-1.44644
cg04640216	-3.53381
cg04642741	-1.96221
cg04652645	0.107126
cg04661759	1.17625
cg04665423	-0.59304
cg04694022	-3.05685
cg04715391	-0.729667
cg04717045	-1.87201
cg04719112	-2.20906
cg04723401	2.87252
cg04734977	-1.53315
cg04735123	-3.32752
cg04747728	-2.12769
cg04748828	-1.24222
cg04748834	-2.06371
cg04755431	-0.366164
cg04767772	-4.90349
cg04771433	-2.69883
cg04784212	-1.46274
cg04798919	-3.53814
cg04818845	-0.645359
cg04830448	-3.25703
cg04850875	-4.33887
cg04872373	-3.4309
cg04880412	-1.4261
cg04909941	-1.05111
cg04915425	-0.704773
cg04919180	-0.429271
cg04925022	-0.639934
cg04939350	-2.35971
cg04944802	-1.45212
cg04945350	-3.15856
cg04970630	-2.43707
cg04992837	-0.836747
cg04995722	-3.71499
cg05006892	0.160033
cg05007325	-1.866
cg05017379	-1.56506
cg05021896	-1.71443
cg05023214	-2.06571
cg05026650	-4.96812
cg05031276	-3.23605
cg05037927	4.29362
cg05043461	-3.19954
cg05059438	-3.65293
cg05099600	-1.30465
cg05105387	-2.60911
cg05109877	-2.5822
cg05159830	-2.88026
cg05162306	-2.17626
cg05163475	0.708004
cg05176667	-1.91282
cg05177729	-2.02524
cg05185565	-3.10468
cg05198900	-2.81225
cg05218245	-1.59746
cg05228237	-3.70996
cg05229802	-3.95657
cg05233094	-0.0252169
cg05235540	-1.70605
cg05236313	-0.789002
cg05246507	-0.0941722
cg05262191	-2.90862
cg05270634	-2.37062
cg05278256	-1.53826
cg05278271	-2.06542
cg05282641	4.33646
cg05295671	-1.43283
cg05312960	-1.75965
cg05339305	-1.71696
cg05342092	-0.869465
cg05345967	-0.757913
cg05354171	-1.45148
cg05364762	-2.32999
cg05369327	-4.41809
cg05374956	-3.24733
cg05376611	-1.78619
cg05389989	-6.53969
cg05390473	-3.86612
cg05398443	-0.422602
cg05406954	-1.9624
cg05410012	-1.72986
cg05433111	-0.984248
cg05442408	-3.38557
cg05456210	-2.1761
cg05456618	-1.91067
cg05467597	-2.42933
cg05473536	-2.95318
cg05494776	-0.913421
cg05541640	-1.33515
cg05560951	-1.55111
cg05576451	-2.117
cg05612973	-3.14878
cg05624244	-2.20998
cg05645677	-3.30365
cg05655707	-4.86047
cg05657694	-2.1474
cg05676441	-5.79077
cg05685483	-4.81264
cg05688348	-1.64052
cg05699592	-1.8249
cg05707981	-1.50552
cg05715293	-0.899773
cg05716556	-2.63821
cg05726910	-1.58031
cg05727423	-1.24442
cg05738030	-3.2864
cg05753589	-0.300461
cg05755646	-4.06214
cg05772104	-2.49884
cg05776704	-1.52522
cg05778415	-1.25543
cg05790451	-2.18602
cg05846730	-0.97442
cg05848509	-1.15883
cg05857941	2.01778
cg05874111	-2.58017
cg05874732	-0.35843
cg05875032	-0.773646
cg05881648	-1.68018
cg05921500	-1.3525
cg05927586	-1.4924
cg05971474	-2.21694
cg05972386	-1.37999
cg05981144	0.119633
cg05989984	0.0993683
cg06011323	0.22107
cg06014631	-4.32111
cg06023994	2.35608
cg06042126	-3.43483
cg06044809	-2.45015
cg06054963	-1.97693
cg06071660	-1.79569
cg06074582	-1.37188
cg06076122	0.67721
cg06085905	0.0775295
cg06125636	-3.46352
cg06132502	-3.85015
cg06157219	-3.27712
cg06161723	0.940349
cg06217314	-0.548644
cg06220449	-2.72142
cg06239616	0.415707
cg06253058	3.04276
cg06266302	-1.59162
cg06276860	-1.4468
cg06277814	-0.971021
cg06280322	-1.47883
cg06297958	-0.929083
cg06323049	-6.59526
cg06349754	-2.52904
cg06369352	-2.14416
cg06381367	-0.867312
cg06391186	-1.65675
cg06394058	0.168083
cg06395056	-1.80369
cg06398236	-2.21691
cg06398396	-2.76598
cg06417885	-0.656823
cg06438343	-2.63867
cg06451815	-1.47746
cg06473675	-0.615804
cg06500714	-0.902121
cg06503534	-0.344047
cg06531671	-2.55336
cg06559576	-0.660826
cg06565452	-5.24405
cg06579577	-3.33185
cg06586560	-4.75085
cg06595595	-3.40258
cg06599920	1.94527
cg06605933	-3.36837
cg06614206	-0.21786
cg06614697	-3.15966
cg06680906	-1.48928
cg06692537	-2.33327
cg06702503	-0.0952946
cg06710596	-5.86976
cg06713671	-4.97443
cg06748421	-2.66392
cg06752231	-0.901132
cg06752482	-2.30856
cg06757662	-2.63506
cg06765219	-5.84193
cg06775644	-0.373647
cg06797656	-3.23332
cg06804921	-2.18657
cg06819865	-3.32819
cg06852350	-4.08855
cg06871772	-1.62605
cg06874426	-1.39719
cg06878361	2.95516
cg06883544	-3.40483
cg06888460	-2.34766
cg06911873	-2.6634
cg06926818	-1.34138
cg06933064	-1.16963
cg06935794	-0.297361
cg06952291	-3.59934
cg06952307	-2.9265
cg06956309	-1.74258
cg06963062	-5.52937
cg06972903	0.550419
cg06981369	-1.41438
cg07018648	-1.73586
cg07031070	-1.46756
cg07042832	-0.49809
cg07044013	-2.59742
cg07057744	-0.835644
cg07062130	4.49741
cg07071978	-0.851837
cg07108648	-2.38251
cg07123548	-1.45429
cg07126617	2.08548
cg07137845	-1.8035
cg07138414	-0.810357
cg07144296	-2.63233
cg07161827	-0.743003
cg07171710	-3.03558
cg07180649	-1.78658
cg07197374	0.218593
cg07229749	-0.11951
cg07233700	-3.66745
cg07239363	-2.13644
cg07239592	-1.70321
cg07242214	-0.282699
cg07242860	-2.47334
cg07243576	-0.596825
cg07243930	0.364324
cg07258794	-2.04741
cg07260361	-0.614564
cg07265541	-2.46286
cg07273222	-0.30391
cg07275305	-4.32168
cg07315426	-0.252717
cg07331053	-2.83515
cg07335422	-1.77152
cg07336438	-2.67433
cg07336987	-0.199571
cg07341624	-0.118422
cg07355476	1.49753
cg07357081	-2.76477
cg07363637	-2.50164
cg07369190	-1.46838
cg07370771	-3.49247
cg07378590	-1.30728
cg07383757	-2.77785
cg07402409	-0.0294068
cg07408232	-4.84201
cg07408569	-2.09668
cg07420311	-0.993878
cg07420362	-0.883031
cg07426960	-3.58445
cg07430849	-3.61214
cg07434518	-1.90502
cg07439316	0.0876427
cg07441654	-1.0876
cg07442271	-0.89311
cg07447907	-0.425765
cg07451659	-2.92189
cg07454491	-3.2873
cg07462521	-1.86444
cg07463519	1.15227
cg07473460	-1.48006
cg07480243	-3.04006
cg07498606	-3.54351
cg07532993	-0.99977
cg07535740	-0.787394
cg07537699	-3.32955
cg07553663	-1.99854
cg07572131	-1.73058
cg07576074	-2.99285
cg07588308	-2.54099
cg07589166	-2.62698
cg07589927	-2.62999
cg07597976	-4.88486
cg07609200	-2.60355
cg07610336	-2.54057
cg07614448	-2.01419
cg07615067	-1.23943
cg07654450	-1.41393
cg07654843	-2.41822
cg07664454	-1.54761
cg07674277	-2.95674
cg07682136	-0.188331
cg07687554	-2.58471
cg07690882	-5.31089
cg07697276	-1.57142
cg07700644	-2.14261
cg07701049	-4.94861
cg07713411	-2.85659
cg07714476	-3.89451
cg07717632	-1.62466
cg07726423	-2.14614
cg07738439	-1.58328
cg07746943	-2.63062
cg07754938	-2.69839
cg07766743	-2.55937
cg07767534	-1.49995
cg07773769	1.0454
cg07788437	-1.26979
cg07798218	-1.54929
cg07805064	-3.00868
cg07811198	-4.32269
cg07836663	-0.415447
cg07864846	-1.91912
cg07869256	-0.160981
cg07875335	-2.15071
cg07876897	-1.82301
cg07892449	-1.71973
cg07915343	-4.27452
cg07927953	-0.694695
cg07937295	-0.0491742
cg07938281	-3.51384
cg07964128	-0.775486
cg07971188	-3.37238
cg07986525	-0.409798
cg07986678	-1.85907
cg08023333	-3.9495
cg08036514	1.10202
cg08050748	-1.7827
cg08092830	-0.792609
cg08099293	-1.97088
cg08103568	-1.94917
cg08105844	-1.25031
cg08111414	-2.31571
cg08126203	-3.79786
cg08135835	-3.07065
cg08144943	-0.666002
cg08145177	0.239354
cg08159594	-3.21369
cg08162780	-2.74016
cg08166720	-1.06957
cg08175928	-2.41683
cg08184198	2.35258
cg08205655	-2.49408
cg08217285	-4.49075
cg08256110	-3.34077
cg08259514	-3.67777
cg08266168	-2.94415
cg08273957	3.00454
cg08278741	-1.56782
cg08287306	-4.13006
cg08318174	-0.396673
cg08342194	-1.28714
cg08346922	0.627796
cg08374494	-1.12039
cg08381955	0.948869
cg08403027	-4.58489
cg08415156	-2.46556
cg08421685	-2.89155
cg08432452	-1.3188
cg08435853	-2.93677
cg08438690	-3.11916
cg08452456	-3.34693
cg08466082	-0.341739
cg08470639	-1.23671
cg08514419	-3.49831
cg08519643	-2.86355
cg08530317	-1.4929
cg08550205	-3.2372
cg08552167	-5.27688
cg08557675	-5.8674
cg08557694	-0.858556
cg08584457	-3.3126
cg08607755	-0.229816
cg08618604	-0.529317
cg08635011	-0.496932
cg08652492	-2.01353
cg08667244	0.0881522
cg08677140	-4.1541
cg08690094	-1.64875
cg08715837	-1.90899
cg08782337	-1.36091
cg08791382	-2.87567
cg08793208	-2.26003
cg08796252	-1.79968
cg08830576	-0.70228
cg08835258	-1.94792
cg08845533	-2.25964
cg08854266	-5.89438
cg08874372	-2.72383
cg08879650	-0.199777
cg08879885	-0.779022
cg08888553	-0.17616
cg08903154	-2.76986
cg08904363	-2.66976
cg08905662	-0.234176
cg08909416	-3.03741
cg08921185	-2.37309
cg08939481	-0.513541
cg08972867	-1.58439
cg08990222	-1.5761
cg08995719	0.173455
cg08996678	1.62655
cg09000800	0.00552421
cg09015566	0.293961
cg09020384	-3.65601
cg09032066	-3.5439
cg09045105	-2.38982
cg09104156	-0.743547
cg09112888	-0.273906
cg09115960	-4.15711
cg09121772	-0.437001
cg09137081	-1.51489
cg09169283	-3.04329
cg09179646	-4.57733
cg09196233	-0.456817
cg09216216	-5.48955
cg09218773	-1.22964
cg09224821	-1.76532
cg09254361	0.36548
cg09264890	-2.03099
cg09281405	-2.00268
cg09286468	-1.29144
cg09289148	-1.72792
cg09328466	-1.42627
cg09335599	-0.396317
cg09349409	-1.61595
cg09350274	-1.80264
cg09357140	-3.71015
cg09357589	-3.29906
cg09357628	-1.62996
cg09361861	-2.57216
cg09366342	-0.647653
cg09410434	-0.442294
cg09434175	0.0617446
cg09439303	-3.16633
cg09451320	-2.12099
cg09457812	-3.31836
cg09474331	-3.04008
cg09493223	-3.50817
cg09493833	-2.83988
cg09514524	-3.79278
cg09538452	-1.16028
cg09547119	5.01981
cg09560161	0.748778
cg09566308	-4.5387
cg09589105	-1.39303
cg09638208	-1.56758
cg09641027	-1.50129
cg09670276	-0.277748
cg09672464	-0.968316
cg09694375	-0.523029
cg09695735	-1.65297
cg09696301	-2.4415
cg09701392	-4.64296
cg09721047	-2.03984
cg09728392	-1.1629
cg09739907	-0.465738
cg09754549	-3.00913
cg09763086	-2.45593
cg09771226	-1.82229
cg09786701	-0.485827
cg09786985	-0.900003
cg09787166	-1.57684
cg09809118	-4.22227
cg09847289	-0.046092
cg09847845	-3.00211
cg09857708	-1.58892
cg09861201	-2.80668
cg09872233	0.308104
cg09873164	1.20537
cg09886037	-3.91408
cg09897970	-2.20944
cg09899914	-4.65007
cg09906448	-0.0412421
cg09921810	-2.78136
cg09925352	-0.123381
cg09926027	-1.0368
cg09957073	-0.76999
cg09964316	-1.59145
cg09966375	-3.39236
cg09971562	-3.25813
cg09974610	-0.249011
cg09980622	-3.09908
cg09982918	0.424782
cg10020546	-2.1666
cg10026473	-5.0892
cg10038009	-3.54412
cg10043652	-1.40399
cg10048490	-1.61109
cg10078898	-2.4057
cg10110367	-2.90563
cg10111831	-3.714
cg10115191	-2.50595
cg10129816	-0.968094
cg10134156	-2.97767
cg10151162	-3.24001
cg10155891	-3.36777
cg10162691	-2.71943
cg10164640	-2.04494
cg10179315	-0.197929
cg10187559	-5.67034
cg10189661	-1.09405
cg10198932	-3.07909
cg10200312	-1.58364
cg10207218	-1.56149
cg10207240	-2.27243
cg10216353	-2.4227
cg10227358	-1.85114
cg10247798	-1.50008
cg10252695	0.482936
cg10293909	-0.265535
cg10325896	-1.66409
cg10336220	-2.42674
cg10372485	-1.52425
cg10394354	-2.5147
cg10397389	-2.6278
cg10428345	-2.79699
cg10439431	-0.791563
cg10439691	-0.483041
cg10443987	-2.13103
cg10464656	-1.15658
cg10470408	-0.802042
cg10496690	-1.84779
cg10503136	-2.96593
cg10524192	-2.38452
cg10535597	-3.62676
cg10546149	-1.5069
cg10566036	-0.957631
cg10570941	2.11996
cg10571104	-2.80084
cg10571406	-2.66045
cg10580144	1.36657
cg10591174	-3.64625
cg10600536	-2.59191
cg10604168	-2.3693
cg10606575	-2.44945
cg10615842	-1.68011
cg10620881	-3.94555
cg10634115	-1.8674
cg10635122	4.88414
cg10652491	-0.21219
cg10665065	-2.38862
cg10675120	-1.67649
cg10685559	-4.82288
cg10726475	2.45694
cg10731149	-2.0683
cg10734164	-3.62591
cg10735633	-0.230599
cg10763547	-4.67785
cg10775792	-1.31793
cg10776591	-1.08131
cg10783469	3.73447
cg10785109	-1.82437
cg10812684	-1.64852
cg10853086	-1.41801
cg10858990	-1.65163
cg10865444	-1.93327
cg10898127	-2.75653
cg10898922	-0.173612
cg10911997	-2.06898
cg10916702	-0.294992
cg10930027	-4.87701
cg10935312	-0.47081
cg10944735	-2.24532
cg10950723	-2.33124
cg10974632	-0.292665
cg10977734	-4.05962
cg10988062	-2.12343
cg10988736	-0.512634
cg10998163	-2.30029
cg11032474	-2.41564
cg11033654	-3.22539
cg11045082	-1.46115
cg11046638	-3.10135
cg11055991	-5.63024
cg11056739	-1.81071
cg11065271	-1.42147
cg11065917	-1.40801
cg11094660	-0.123871
cg11128956	-5.0421
cg11145160	-2.55346
cg11159295	-1.81518
cg11165881	-2.35477
cg11181985	-2.68647
cg11197693	-0.335062
cg11205981	-1.12978
cg11210160	-2.16125
cg11211951	-1.19911
cg11216550	-2.96638
cg11231500	-2.51267
cg11231913	-2.10367
cg11237951	-0.538806
cg11240043	-1.48738
cg11253514	-0.399296
cg11259409	-1.23432
cg11267410	-2.82521
cg11269599	2.29479
cg11288764	-1.3151
cg11294143	-1.05261
cg11308227	0.155376
cg11310341	-4.9193
cg11315500	-1.464
cg11320187	-2.66844
cg11323848	-0.292665
cg11334214	-0.903938
cg11339851	-3.31199
cg11340260	-2.86901
cg11365623	-2.3557
cg11369867	-2.43285
cg11394115	-2.90364
cg11397548	-0.861606
cg11415402	-0.0863162
cg11440424	-1.51386
cg11452501	-1.19592
cg11464053	-4.60716
cg11466935	-3.0384
cg11491074	-2.17974
cg11492019	-1.92506
cg11499025	-2.89022
cg11522612	-2.12449
cg11538311	-4.68773
cg11540771	-0.887768
cg11568398	-1.47431
cg11584277	-4.0403
cg11588288	-0.0887262
cg11615447	-0.891251
cg11617144	-5.41545
cg11631644	-1.56794
cg11654882	-2.00468
cg11692070	-6.80606
cg11750883	-4.26654
cg11753051	-0.00302377
cg11784785	-2.32008
cg11795222	-2.38428
cg11802013	-3.4158
cg11805138	-1.73908
cg11811828	-3.64752
cg11830695	-3.22709
cg11838224	-1.11809
cg11852499	0.535301
cg11867697	-5.52735
cg11874247	-3.71919
cg11875119	-1.12738
cg11892002	-1.19827
cg11896246	-3.76826
cg11898695	-2.17999
cg11906827	-2.64616
cg11912330	-0.805118
cg11920018	-2.47122
cg11920122	-3.34199
cg11957449	-2.91651
cg12008047	-2.67897
cg12008643	1.71845
cg12032464	-0.492565
cg12034086	-2.07551
cg12047194	-0.268198
cg12055133	-3.77171
cg12061357	-1.95059
cg12065366	-3.04205
cg12072024	-1.10231
cg12080909	-2.16116
cg12085977	-5.94544
cg12127040	1.83695
cg12131208	-3.67633
cg12140762	-0.0591008
cg12152765	-2.17518
cg12178578	-2.22458
cg12190768	-0.825545
cg12223283	0.0377844
cg12227172	2.27357
cg12263469	-2.11111
cg12269473	-5.64806
cg12277122	-2.25042
cg12281365	-3.12126
cg12291109	-0.828389
cg12299554	-1.73914
cg12300939	-2.36572
cg12320322	-1.60023
cg12327405	-3.47419
cg12331229	-0.932419
cg12333008	-0.857922
cg12334911	-1.29913
cg12363726	-2.84321
cg12377578	-0.692457
cg12379775	-1.98253
cg12389043	-1.02029
cg12419348	-2.95962
cg12419678	-1.08511
cg12420723	-0.685968
cg12475381	-2.31523
cg12482755	-2.62922
cg12487540	-2.78854
cg12507125	1.96732
cg12513308	-1.26841
cg12517191	-2.50664
cg12554483	-2.56598
cg12582734	-5.54381
cg12588301	-0.854722
cg12612091	0.115061
cg12623930	-2.23289
cg12632549	-0.876199
cg12687331	-0.124086
cg12691330	-1.33312
cg12694583	-0.514027
cg12696259	-3.29094
cg12696750	0.739556
cg12699784	-0.454909
cg12704993	-1.0639
cg12705353	-3.99535
cg12736868	-1.15211
cg12741994	1.70345
cg12746427	-2.52938
cg12788108	-2.59222
cg12791555	-2.27323
cg12794878	-1.2167
cg12858746	-3.77946
cg12865939	-4.01916
cg12868544	-3.00717
cg12870052	-1.59948
cg12870827	0.928086
cg12880602	-2.48005
cg12891590	-2.01538
cg12897578	-0.0526639
cg12908267	0.455607
cg12930602	-1.27156
cg12943674	-0.482586
cg12955523	-0.089721
cg13019568	-2.52355
cg13019868	-4.73423
cg13059337	-2.70477
cg13063704	-2.17157
cg13092487	-0.860058
cg13118545	-3.43222
cg13141192	1.41074
cg13169641	0.454363
cg13181079	-5.10718
cg13205528	-2.94402
cg13207345	-1.96361
cg13217508	-1.47407
cg13228576	-3.04646
cg13238350	-2.31549
cg13246242	-3.45148
cg13250324	-1.49331
cg13251269	-0.716292
cg13254221	-1.32525
cg13255056	-1.64818
cg13257436	-1.09946
cg13280080	-2.53096
cg13291156	-2.78212
cg13307920	-1.55549
cg13309775	-1.27418
cg13333304	-1.93591
cg13348530	-4.51765
cg13352836	2.54838
cg13356429	0.308787
cg13364038	-1.93604
cg13377102	-3.13013
cg13385408	-1.79508
cg13391313	-0.157879
cg13393830	2.83854
cg13401831	-1.61217
cg13405293	-1.25527
cg13407335	-1.96779
cg13412106	-0.42003
cg13448589	-3.35712
cg13459852	-1.70921
cg13461447	-2.61416
cg13464393	-2.02741
cg13479898	-3.11988
cg13520715	0.16717
cg13522406	-2.4708
cg13543375	0.0226689
cg13545089	-0.428346
cg13545705	-1.25435
cg13547299	-1.28825
cg13548946	-3.21895
cg13549890	-1.3735
cg13550068	-2.29231
cg13573245	-1.42988
cg13574857	0.13102
cg13575601	-0.183308
cg13609821	-4.91627
cg13612543	-2.98755
cg13621464	-2.28798
cg13627197	-1.50226
cg13661968	1.39811
cg13668490	-3.91915
cg13692526	-3.0091
cg13697368	-2.24683
cg13699009	-4.60636
cg13715127	-2.41558
cg13726843	-0.359748
cg13730497	-1.4091
cg13736131	-3.65403
cg13769582	-1.88075
cg13780065	-2.50688
cg13784557	-2.37403
cg13785898	-2.01164
cg13823003	-1.54795
cg13842025	-1.8057
cg13849459	-2.01542
cg13857119	-1.79747
cg13858747	-0.356394
cg13877315	-3.66461
cg13879776	-2.99341
cg13883672	-0.941186
cg13884047	-2.75661
cg13894784	-2.94622
cg13921324	-0.478699
cg13937462	-1.59882
cg13951491	3.3417
cg13965202	-3.00762
cg13965328	-3.18768
cg13974531	-2.37303
cg13977355	-1.11729
cg13977597	-2.8626
cg13984746	-1.62787
cg13999086	-4.84673
cg14010279	-1.31289
cg14013080	-3.74382
cg14019826	-3.26378
cg14023926	-2.13226
cg14030359	0.205483
cg14036627	-3.48921
cg14042352	-4.544
cg14064526	-3.93245
cg14064694	1.47033
cg14078518	-1.30607
cg14080129	-2.43233
cg14086900	-2.89292
cg14090292	-0.565255
cg14101527	-2.00266
cg14102807	-0.734155
cg14107644	-0.604505
cg14115392	-3.85364
cg14131536	-4.91645
cg14147394	-1.72772
cg14149701	-2.73731
cg14157514	-3.35057
cg14159004	-2.53237
cg14159956	-1.17138
cg14189304	-1.61027
cg14199577	-5.77356
cg14213842	-2.69724
cg14226747	-1.29185
cg14226929	-0.678073
cg14246614	-2.67818
cg14248811	-2.91955
cg14259096	-1.31704
cg14275445	-2.69042
cg14291919	-2.39697
cg14320220	-1.9077
cg14320626	-0.958962
cg14322055	-1.71211
cg14329441	-1.67436
cg14341953	-4.04618
cg14349763	-3.45698
cg14403184	1.60208
cg14404746	-2.13278
cg14408250	-0.78518
cg14409810	-0.896032
cg14413996	-1.59565
cg14459057	-2.56714
cg14460564	-1.15707
cg14464052	-3.29247
cg14465237	-0.838245
cg14468236	-1.92603
cg14470398	-2.00738
cg14494596	-3.39228
cg14496016	-1.32926
cg14506696	-1.87644
cg14528318	-1.66223
cg14534464	-3.29318
cg14534674	-0.657456
cg14540594	-0.320252
cg14557185	3.20173
cg14578284	-1.66733
cg14600786	-0.997218
cg14606067	-1.91891
cg14612428	-2.29489
cg14622801	-0.18521
cg14633527	0.0630402
cg14635586	2.60543
cg14646944	-1.39195
cg14649650	-0.60999
cg14653576	-1.45749
cg14664412	-2.91086
cg14696535	1.35677
cg14717796	-1.71851
cg14743859	-2.90787
cg14793287	-2.21011
cg14794445	-4.28055
cg14802951	-0.84404
cg14811496	-0.555622
cg14814062	-3.27177
cg14830003	-2.30523
cg14837544	-1.95006
cg14839323	-1.2199
cg14851346	-0.227029
cg14871534	3.71309
cg14871544	-2.37944
cg14878065	-1.07874
cg14879860	-2.10555
cg14895140	-3.44238
cg14900295	-1.73268
cg14913111	-2.13965
cg14916288	-3.35047
cg14918082	-3.93675
cg14924046	-1.47548
cg14935078	0.0201023
cg14941025	-2.31848
cg14958017	-1.38305
cg14984246	-0.644281
cg15039036	-2.08135
cg15043384	1.99168
cg15063695	-0.884317
cg15066100	-3.75755
cg15067907	-2.16321
cg15071854	-2.34012
cg15091337	-2.42673
cg15106452	-2.84111
cg15140562	-2.94519
cg15142116	-4.27687
cg15143115	-1.70576
cg15148683	-2.72252
cg15166590	-3.38628
cg15204474	-1.55688
cg15213210	-1.28174
cg15218346	-2.15729
cg15226102	-4.42697
cg15234168	-3.10042
cg15241920	-0.161525
cg15248784	-1.94714
cg15250002	-1.4361
cg15258980	-1.46742
cg15319528	-3.21043
cg15321238	-1.61511
cg15352671	-4.1711
cg15353061	-0.345745
cg15420071	0.156387
cg15426035	-3.32856
cg15432305	-0.746467
cg15463284	-6.1987
cg15477363	-1.90183
cg15509024	-3.36758
cg15523852	-0.705354
cg15550572	-4.90657
cg15553990	-2.81847
cg15582954	-2.51643
cg15600512	-0.664614
cg15605858	-3.77724
cg15610667	-3.11462
cg15644003	-0.672088
cg15653044	-3.7803
cg15654143	-1.241
cg15655495	-1.73201
cg15664702	-0.423795
cg15685971	-1.25542
cg15703728	-1.26417
cg15706388	-1.2477
cg15717330	-0.440428
cg15723536	-0.254339
cg15729137	-5.3701
cg15731053	-5.88267
cg15769475	-2.07921
cg15775266	-5.97501
cg15782561	-1.47578
cg15803756	-4.36162
cg15806880	-1.69047
cg15814605	-1.41227
cg15814736	-4.55081
cg15827505	-2.25095
cg15838173	-4.41562
cg15843823	1.15742
cg15845653	-1.25341
cg15848561	-2.89822
cg15853475	-3.02259
cg15856275	-2.86197
cg15861196	0.515619
cg15867652	-2.45767
cg15872478	-2.72697
cg15872575	-4.03673
cg15923688	-1.75789
cg15924985	-1.18544
cg15925383	2.96116
cg15947007	-1.58766
cg15951188	-3.49881
cg15951557	-1.84291
cg15954046	-1.00436
cg15959252	-1.17639
cg15968307	-0.81717
cg15972301	-2.95771
cg15983520	-0.236599
cg15991708	-1.42245
cg16044482	-2.206
cg16048006	-0.347486
cg16053716	0.076407
cg16063064	2.04392
cg16063416	-2.04145
cg16073427	-2.5544
cg16078235	-0.536688
cg16099599	-3.60538
cg16151551	-1.2822
cg16172549	-4.77863
cg16178299	-0.0530733
cg16191750	-1.01862
cg16194820	-0.0212309
cg16246366	-1.14228
cg16251205	-1.31395
cg16251519	-2.35388
cg16265731	-2.23674
cg16276224	-5.38497
cg16285698	-0.339157
cg16288713	-5.78966
cg16309970	-1.15563
cg16323609	-4.52285
cg16328106	2.88718
cg16336280	-2.16389
cg16372632	-1.19096
cg16387046	-2.90054
cg16389386	-2.97197
cg16411256	-2.37601
cg16420866	-0.591383
cg16422492	-1.96499
cg16423811	0.428984
cg16453065	-6.57615
cg16495221	1.56094
cg16502595	-2.69049
cg16502726	-2.12687
cg16513459	-4.93161
cg16523463	-1.00009
cg16540658	-1.809
cg16542170	-4.04514
cg16553272	-3.08819
cg16553527	-2.66292
cg16556397	-1.56219
cg16561878	-1.29872
cg16587066	-2.97299
cg16593917	1.27274
cg16595241	-2.61947
cg16632593	-4.91927
cg16633058	-0.896312
cg16636756	-2.39715
cg16657815	0.0520474
cg16693127	-1.28808
cg16720971	-1.84552
cg16731240	2.4288
cg16739679	0.56508
cg16755500	-2.85811
cg16777618	-3.91995
cg16787643	-2.08343
cg16791619	2.52037
cg16816806	-3.21687
cg16839083	-0.146328
cg16853660	-0.16714
cg16856874	-2.63393
cg16869281	-1.53417
cg16879222	-0.954062
cg16882373	-3.78041
cg16884902	-4.60697
cg16897264	-1.32348
cg16929104	-2.80725
cg16953816	-6.11976
cg16955704	-2.92381
cg16965027	-1.49223
cg16972130	-0.0694633
cg16990120	-0.366194
cg16992787	-0.833329
cg17012575	-3.11822
cg17018976	-0.475561
cg17021376	-1.04295
cg17025835	0.0651545
cg17035770	-1.54481
cg17036741	-3.97194
cg17045432	-3.09149
cg17046776	-0.73166
cg17054432	-1.55691
cg17054783	-2.60787
cg17072087	-2.80064
cg17078427	3.6574
cg17088428	-6.04849
cg17089680	-3.63196
cg17111837	-3.08154
cg17120563	-0.321385
cg17128833	-1.76884
cg17131044	-0.736834
cg17141626	-1.03327
cg17159537	-0.806867
cg17169931	-0.207877
cg17186727	2.4607
cg17187990	0.323192
cg17213154	-2.89759
cg17217295	-1.53051
cg17222365	-2.99107
cg17225222	-1.78824
cg17225407	-2.27715
cg17234776	-0.800228
cg17247959	-2.45532
cg17259143	-3.16648
cg17261234	-1.4603
cg17297696	0.635782
cg17328062	-1.87466
cg17336496	-3.25406
cg17347335	-4.68609
cg17347389	-2.54949
cg17354190	-1.62905
cg17357895	-3.34411
cg17366191	-1.10532
cg17380091	-3.42784
cg17426063	-1.51447
cg17451432	-0.806907
cg17499822	-3.26757
cg17518351	0.536642
cg17523769	-3.08034
cg17543779	-1.40499
cg17557552	-4.70254
cg17560523	-1.59196
cg17603271	-2.1859
cg17628249	-2.23116
cg17633422	-0.974964
cg17638841	-2.85957
cg17645598	-3.37739
cg17646250	-2.09397
cg17656881	-2.28628
cg17696583	-0.227654
cg17705128	-6.08414
cg17708806	-3.04166
cg17723958	-1.44196
cg17738194	-4.81584
cg17750946	-0.264535
cg17768957	-2.6376
cg17786254	0.120274
cg17800124	0.0948395
cg17805068	-3.14097
cg17808635	-2.21712
cg17808746	-2.5281
cg17822452	-3.22603
cg17852388	-4.20491
cg17861220	-2.124
cg17861836	-5.62709
cg17869161	-4.83384
cg17889137	-4.11048
cg17891486	-2.86522
cg17895157	-1.52508
cg17895254	-0.187191
cg17906269	-1.99633
cg17931227	-3.54044
cg17960727	-2.05601
cg17970176	-1.98348
cg17980507	2.72018
cg17986469	0.363312
cg17999642	-1.57939
cg18000752	-5.22945
cg18005337	-8.87831
cg18005693	-1.66782
cg18020268	-1.31002
cg18035537	-0.432555
cg18081258	-2.28759
cg18090197	-1.11143
cg18108669	-2.74115
cg18117315	-2.57685
cg18122217	-1.35695
cg18158151	2.69067
cg18214570	-1.18532
cg18233538	-1.52244
cg18262830	-4.59504
cg18277507	-1.5221
cg18277764	-2.29617
cg18282456	-1.46579
cg18292304	-0.986133
cg18328933	-0.334508
cg18361663	-1.46108
cg18362509	0.0553868
cg18378494	-2.22857
cg18404628	-1.07846
cg18435532	-6.57732
cg18442524	-1.67336
cg18457438	-3.08614
cg18465515	1.21082
cg18493326	-0.427324
cg18514406	-0.382762
cg18548879	-4.90678
cg18555289	-2.15876
cg18560551	-2.63755
cg18571585	-0.199764
cg18583246	-4.09555
cg18589874	-0.801964
cg18618429	-3.296
cg18636641	-4.4886
cg18682103	-4.33394
cg18683604	-1.59896
cg18684905	-1.9773
cg18695143	-1.35547
cg18699242	-1.69773
cg18712677	-2.69107
cg18727936	-2.76272
cg18727948	0.0232141
cg18745931	-4.24242
cg18758622	-0.998826
cg18777231	-2.28115
cg18795383	-2.3394
cg18800854	-1.91235
cg18811819	-1.8734
cg18844118	-5.1735
cg18845375	0.700578
cg18863237	-3.04718
cg18874912	-4.15743
cg18875460	-1.51783
cg18888461	-3.9736
cg18925980	-2.08084
cg18936115	-3.3284
cg18941614	-3.04589
cg18954388	0.253275
cg18982587	-2.04933
cg19037350	-2.35244
cg19095567	-3.87155
cg19113326	-1.24007
cg19113668	0.252775
cg19123863	-1.03516
cg19195419	-2.42537
cg19211619	-2.01549
cg19232655	-0.961273
cg19240857	-2.02123
cg19244297	-2.73557
cg19251326	-0.194387
cg19267397	-1.49653
cg19270251	-1.45506
cg19273773	-2.3864
cg19309855	-0.864645
cg19319125	0.244237
cg19337854	-1.89473
cg19355929	-4.24114
cg19362689	-1.60624
cg19376572	-2.94829
cg19376842	-2.14342
cg19391966	-1.982
cg19401060	0.597571
cg19442545	-3.98214
cg19461383	-2.12449
cg19466180	-1.33916
cg19472254	-0.306144
cg19472611	-2.52859
cg19479654	-3.50879
cg19479765	-0.467685
cg19482843	-2.60305
cg19486271	-5.04932
cg19501941	1.73648
cg19510999	-1.40166
cg19524023	-2.07825
cg19529709	-1.68463
cg19576080	-2.28305
cg19580752	0.056975
cg19592235	-1.87544
cg19595107	2.99851
cg19602773	0.0532584
cg19604706	-2.80774
cg19640166	-1.9253
cg19668696	-2.22945
cg19670286	-3.93595
cg19678959	-2.4501
cg19693760	0.10749
cg19695198	-1.21031
cg19700341	-1.15529
cg19739468	-1.29655
cg19760898	-0.297391
cg19764047	0.198676
cg19771672	-2.26192
cg19774424	-2.68515
cg19784903	-6.7134
cg19785742	0.150188
cg19790321	2.39573
cg19814830	0.234006
cg19830283	-0.336477
cg19832184	-1.69495
cg19849696	-1.75171
cg19851047	0.107815
cg19851715	1.6361
cg19861823	-1.90086
cg19862427	-1.7893
cg19868468	-4.9373
cg19875368	-3.5646
cg19875532	-4.63341
cg19902797	-1.12549
cg19908207	-0.942944
cg19944848	-3.82557
cg20019019	-0.0476017
cg20034617	-3.67655
cg20051635	-3.52831
cg20059140	-1.53427
cg20061371	-5.28401
cg20064122	-0.612128
cg20080006	0.899764
cg20094452	-0.0280448
cg20101182	-1.84264
cg20107733	-0.15589
cg20108334	-0.463727
cg20112079	-0.79532
cg20116579	-3.14442
cg20128456	-0.926052
cg20138071	-2.10021
cg20158582	-2.76115
cg20163085	-2.65102
cg20164915	-0.531381
cg20165992	-0.712429
cg20222321	-1.81535
cg20230372	-2.00834
cg20237752	-1.33006
cg20276750	-2.21509
cg20278246	-3.1393
cg20286114	1.97744
cg20288341	-2.74122
cg20300175	-2.64037
cg20304988	0.318877
cg20316713	-1.16222
cg20329620	-0.785239
cg20350981	-3.0257
cg20388038	-2.34347
cg20389901	0.40242
cg20402653	-0.801653
cg20444702	0.530618
cg20446334	-6.44045
cg20449692	-1.97323
cg20489898	-2.40431
cg20498746	-0.181231
cg20513548	-0.28629
cg20530585	0.922458
cg20545776	-1.74189
cg20561968	-2.03007
cg20562630	-1.087
cg20571420	-2.94458
cg20576597	-2.11782
cg20613151	-4.23127
cg20617917	-2.51565
cg20625782	1.32888
cg20632573	-0.14576
cg20645232	-5.66186
cg20654935	-0.93115
cg20676542	-1.82034
cg20680045	-2.35831
cg20680819	-2.04751
cg20726275	0.195123
cg20748350	-0.370203
cg20750215	-1.82773
cg20771743	0.623399
cg20772512	-3.53476
cg20780480	-1.33884
cg20786422	-2.02893
cg20791564	-2.71052
cg20794824	3.00391
cg20794828	-4.70198
cg20834073	-4.30068
cg20848207	-1.84776
cg20874811	-0.372161
cg20902783	-3.82415
cg20903874	-3.29837
cg20914906	-2.95772
cg20919922	-3.2801
cg20921448	-0.821768
cg20924286	-3.84004
cg20926049	-0.242588
cg20933297	-5.18402
cg20939768	-3.18723
cg20954987	-2.94912
cg20966404	-3.43986
cg20975074	-2.46396
cg21016266	-3.2289
cg21039273	-2.13571
cg21050392	-1.88601
cg21082452	-0.717641
cg21095982	-1.33955
cg21106348	-1.14901
cg21111121	-1.70358
cg21122199	-2.06517
cg21145524	-3.92161
cg21171335	-5.15404
cg21171625	-3.07868
cg21206652	-4.70678
cg21211585	-2.23552
cg21225170	-1.05081
cg21231302	-1.41678
cg21238254	-2.1246
cg21249655	-0.945307
cg21252282	-0.977693
cg21255097	-3.478
cg21264131	-1.87734
cg21278737	-2.50614
cg21281951	1.48563
cg21287054	-5.57794
cg21293831	-0.806387
cg21359468	-2.78918
cg21375878	-1.0418
cg21377403	-1.59821
cg21384164	0.194632
cg21386120	-0.34057
cg21386373	-1.90469
cg21389569	-3.17821
cg21399685	0.665757
cg21400896	-0.348976
cg21408716	0.103476
cg21423930	-5.4029
cg21429107	-1.8262
cg21453378	-1.87317
cg21466821	-0.593652
cg21467108	-1.60145
cg21468728	-2.34648
cg21471778	-0.420027
cg21488617	-2.36927
cg21491100	-5.95471
cg21496319	-3.79976
cg21503148	-3.39974
cg21524685	-0.0598891
cg21565415	-0.324803
cg21608792	-2.3446
cg21610164	0.814233
cg21614638	-0.903024
cg21676740	-3.57308
cg21684411	-1.24386
cg21686486	-0.151758
cg21720324	-4.18421
cg21731345	-3.66307
cg21739816	-2.4491
cg21752383	-3.77404
cg21767036	-0.976851
cg21784541	-2.81986
cg21810621	-1.51886
cg21823605	-4.63406
cg21838488	-2.5127
cg21845713	-3.39558
cg21852992	-2.49587
cg21860300	-2.06131
cg21868134	-3.03384
cg21878334	-1.30817
cg21883754	-0.760079
cg21889519	-1.11863
cg21891049	-3.14853
cg21925748	-0.580417
cg21932814	-2.24028
cg21946698	-1.36076
cg21949747	-1.04162
cg21951391	2.48734
cg21964662	-4.87043
cg21967545	-1.5072
cg21974675	-0.909556
cg21994794	-1.82229
cg22019290	-1.42174
cg22027408	-1.48913
cg22032521	-1.28675
cg22040144	2.29728
cg22070243	-2.08468
cg22081008	-3.42577
cg22087119	-2.30726
cg22099723	-0.926113
cg22125587	0.133972
cg22159528	-2.77323
cg22165685	-1.5376
cg22168489	-3.56562
cg22189632	-2.68797
cg22191510	-0.667765
cg22237916	-0.534668
cg22249932	-2.66574
cg22272697	-2.45762
cg22280258	-2.85795
cg22291762	-2.62873
cg22299857	-0.38681
cg22321572	-3.59345
cg22325646	-2.65148
cg22331349	3.56963
cg22339091	-2.03274
cg22340526	-4.10807
cg22358102	-1.74741
cg22360649	-2.7972
cg22366001	-1.70536
cg22407531	-1.57683
cg22421699	-0.938124
cg22424444	-1.91783
cg22425466	-1.7688
cg22442557	-1.12861
cg22449370	-4.77364
cg22453113	-2.94565
cg22459517	-1.88361
cg22472290	1.59688
cg22482235	-4.52165
cg22507772	-4.22293
cg22523743	-1.22113
cg22524787	-2.70377
cg22542751	-1.24816
cg22553423	-3.46005
cg22556358	-0.43849
cg22557388	-1.84035
cg22561460	-1.42223
cg22561845	-2.64263
cg22596683	-1.13322
cg22616007	-2.90841
cg22618164	-3.59545
cg22634505	-4.15138
cg22668971	-1.93593
cg22673543	-3.68835
cg22673724	0.215374
cg22686910	-1.65608
cg22701603	-4.22674
cg22715479	-1.73048
cg22717825	-1.82518
cg22723818	-2.08941
cg22727233	-4.19841
cg22734480	-1.63391
cg22781352	-1.82142
cg22799420	-3.88799
cg22819888	-1.75804
cg22830947	-2.54388
cg22834418	-4.17871
cg22837325	0.796395
cg22888181	-2.28102
cg22897224	-3.62075
cg22934568	-0.114418
cg22940152	-3.61013
cg22952917	-3.82315
cg22960869	-0.332751
cg22964259	-1.87923
cg22989033	-3.285
cg22991148	-1.70674
cg22996718	-0.80842
cg23001415	-4.39806
cg23010048	3.06432
cg23017915	1.83898
cg23042052	-3.49298
cg23044903	-2.92534
cg23045255	-1.74401
cg23093496	-1.38599
cg23105839	1.11156
cg23118086	-2.90835
cg23167225	0.0698044
cg23231163	-4.25867
cg23232773	-1.73532
cg23233200	1.36507
cg23252259	-5.58067
cg23282585	2.34989
cg23288563	-1.30961
cg23291048	-4.9022
cg23330204	1.16558
cg23342234	-2.37788
cg23357265	-1.66536
cg23358572	0.112249
cg23361355	-3.4776
cg23370328	3.16205
cg23389808	-0.260012
cg23405039	1.95256
cg23418106	-1.29438
cg23446106	-2.60095
cg23455341	-2.01953
cg23458174	-0.726662
cg23459483	-2.61474
cg23474794	-0.900335
cg23499033	-1.32808
cg23505890	-0.986169
cg23511432	-3.16659
cg23513814	-1.87206
cg23517199	-0.610455
cg23533926	-1.48267
cg23539176	-1.14447
cg23540518	-3.30994
cg23552977	-1.94754
cg23583454	-4.26473
cg23588893	-0.934968
cg23593986	-0.300236
cg23602977	-2.5133
cg23628489	-4.96391
cg23638139	0.74983
cg23638640	-4.7963
cg23649784	-2.09146
cg23652866	-1.97045
cg23653443	-2.5261
cg23687322	-2.63054
cg23695687	-0.546055
cg23697202	-3.72936
cg23700278	-1.7362
[truncated: 308 more rows]

## Sheet: 031
probe_id	median_change
cg00021513	-4.82162
cg00023197	3.18906
cg00037681	-0.174951
cg00050294	-1.68689
cg00058786	-0.502689
cg00076653	-0.992418
cg00101940	-4.02834
cg00115288	-2.13393
cg00120534	-3.01508
cg00127861	-1.18933
cg00135038	3.40566
cg00136400	-3.5268
cg00211800	4.07721
cg00214171	-3.00504
cg00241712	-0.212526
cg00259046	-2.42673
cg00275103	-1.15904
cg00299736	-3.11564
cg00327483	0.820687
cg00329272	-1.62879
cg00355829	-2.57431
cg00383384	-0.0672709
cg00391945	-2.21961
cg00397103	-3.83803
cg00399378	-3.12376
cg00422626	-3.52075
cg00447324	-3.15046
cg00456894	0.512184
cg00554118	-0.432549
cg00585116	-4.42061
cg00604640	-3.24371
cg00626167	1.60867
cg00634576	-2.24633
cg00637173	-4.96678
cg00670539	-1.75354
cg00678630	-2.0823
cg00694302	-2.63298
cg00697057	1.66352
cg00727940	-0.489317
cg00731886	-0.968124
cg00808935	-0.13768
cg00832868	2.81147
cg00900933	-3.66284
cg00925802	-2.90026
cg00944142	-3.02163
cg00976381	0.854793
cg00986580	-2.21755
cg01006124	-2.20643
cg01016546	-1.2574
cg01113339	-1.46461
cg01117788	-1.58103
cg01185433	0.630413
cg01190484	-4.23573
cg01263075	1.54097
cg01266390	-1.40461
cg01268859	4.31735
cg01285926	-4.58139
cg01326058	-5.23936
cg01335087	-2.47605
cg01358513	-4.50403
cg01376818	-5.86769
cg01382181	0.00251051
cg01399485	-0.599909
cg01405767	-1.16204
cg01426968	0.696834
cg01431576	-3.5444
cg01461211	-1.69183
cg01500115	-2.18878
cg01505767	-2.49704
cg01548199	-0.566553
cg01571660	-2.31944
cg01573554	1.19246
cg01588444	-0.469422
cg01614478	-3.01624
cg01633093	-1.01624
cg01636253	0.0221173
cg01638529	-0.289312
cg01670444	-2.40916
cg01692771	-5.4991
cg01697354	-1.49497
cg01708964	-1.76775
cg01709921	1.70504
cg01731023	-1.44405
cg01742263	1.98018
cg01767732	5.07965
cg01769514	-1.11725
cg01789478	0.668876
cg01818102	-0.153544
cg01820374	2.09376
cg01836011	-1.69183
cg01847818	2.79431
cg01863682	2.61259
cg01864498	-0.76166
cg01878807	1.01357
cg01905809	5.19235
cg01910481	-0.402461
cg01910638	-2.75909
cg01923477	-0.185327
cg01930524	-2.73042
cg01937701	-2.93006
cg01953615	-1.93612
cg01977798	-1.11388
cg01998856	-2.59847
cg02018176	-2.52003
cg02021210	3.04504
cg02062254	-2.47934
cg02078690	2.52065
cg02078844	0.0914347
cg02132535	0.751462
cg02141940	-1.66849
cg02148353	-1.80701
cg02149160	-2.2264
cg02159381	0.594658
cg02196227	0.695603
cg02226239	-3.4826
cg02230103	-3.1297
cg02254774	-0.777672
cg02259384	-3.30112
cg02279625	-1.28644
cg02286081	-2.14528
cg02294730	0.758272
cg02335642	-2.62133
cg02343008	-1.05051
cg02346997	-2.11491
cg02359025	-2.0762
cg02401149	-0.142738
cg02432860	-3.62946
cg02433278	2.84357
cg02433803	-3.41295
cg02459086	-1.83431
cg02461342	-0.0152795
cg02461767	-5.25434
cg02462487	0.0234987
cg02466008	-1.82805
cg02467451	-3.9812
cg02467735	-0.0305546
cg02477603	-4.35235
cg02517825	-1.94325
cg02553302	-1.3077
cg02565494	-3.19866
cg02578368	5.45193
cg02582669	2.32522
cg02597493	-4.92302
cg02611812	-2.77778
cg02616368	-3.05773
cg02622579	0.514085
cg02629506	-1.36669
cg02642841	-2.34575
cg02661860	2.41985
cg02695343	1.4204
cg02765343	-1.37095
cg02772099	-0.288613
cg02796229	-1.74527
cg02813916	-2.75435
cg02819605	2.52217
cg02827714	0.363093
cg02850812	1.97001
cg02858449	-2.32122
cg02867514	-1.43
cg02968407	-1.66036
cg03010761	-3.16392
cg03012421	-4.5719
cg03051983	-4.99216
cg03118626	-2.19566
cg03134809	-2.2141
cg03135713	2.16532
cg03170725	-0.575825
cg03188118	4.35218
cg03189479	-0.879567
cg03196627	-1.31679
cg03228567	-3.1801
cg03234175	-4.21197
cg03251349	-0.74203
cg03304469	2.14521
cg03343421	0.0193723
cg03415858	1.98309
cg03419596	2.09234
cg03449456	-3.79731
cg03456771	-3.5842
cg03460239	-2.63216
cg03477112	-2.46203
cg03499581	-1.38068
cg03500771	-0.849841
cg03501633	-1.85792
cg03529043	-0.406862
cg03558326	-3.09116
cg03569637	-2.427
cg03584826	-0.971046
cg03602143	-1.92338
cg03651182	-1.42678
cg03665259	-3.34026
cg03682560	-1.75555
cg03718651	-2.54935
cg03762081	-3.2426
cg03767531	1.34497
cg03778138	-0.650049
cg03789498	-1.80326
cg03855954	-2.28917
cg03872376	-3.19343
cg03965138	-3.42046
cg03991477	-1.22591
cg04024840	0.11011
cg04036101	0.984577
cg04038879	-0.932615
cg04047566	-3.48904
cg04062576	-1.7816
cg04068518	-3.23741
cg04080530	-3.50092
cg04092231	0.989251
cg04153135	0.0659821
cg04155793	-5.33534
cg04180848	-4.58665
cg04188351	1.93216
cg04193909	1.30233
cg04231541	-0.593614
cg04255421	-1.23669
cg04257752	-6.77007
cg04265961	-2.54486
cg04289880	-4.57479
cg04297829	-2.25944
cg04299389	-4.46321
cg04303964	-1.55807
cg04359365	-0.277733
cg04385631	-1.79807
cg04428701	-0.589405
cg04441103	-2.96103
cg04446345	-1.802
cg04451570	-2.13678
cg04488373	-4.56955
cg04505439	1.59517
cg04517747	-2.11034
cg04547137	-4.206
cg04591650	-3.1625
cg04651914	0.0196616
cg04658841	-0.489594
cg04671742	2.16326
cg04690246	-1.94606
cg04753856	-0.155593
cg04770751	0.668801
cg04772683	-0.173102
cg04843330	-2.47436
cg04856117	-1.34128
cg04857300	-0.670907
cg04863665	-1.89244
cg04868764	-2.39971
cg04875514	0.515364
cg04920214	-2.46521
cg04939944	2.15965
cg04985004	-1.90688
cg05005821	-3.11568
cg05033439	-0.954498
cg05036839	2.33837
cg05054115	-3.8124
cg05123447	-0.125561
cg05164634	-5.49196
cg05171021	-1.96739
cg05185791	2.56814
cg05193970	-1.47873
cg05206599	-3.33961
cg05221664	-4.55411
cg05236728	-2.95529
cg05330754	-2.43507
cg05407338	-0.236292
cg05414338	4.71252
cg05446860	-2.41372
cg05451032	-1.19418
cg05457684	-1.38979
cg05468349	-4.82677
cg05511613	1.17754
cg05529500	-0.0522806
cg05547279	-2.02833
cg05557583	-4.01226
cg05581264	-1.88681
cg05586624	-1.93787
cg05593618	-1.86874
cg05594122	-3.81757
cg05596756	0.395605
cg05603440	-1.11454
cg05608716	4.83618
cg05618068	-0.471918
cg05619024	-1.98636
cg05623594	-4.26542
cg05637384	0.36859
cg05638059	-1.95898
cg05681072	-2.63337
cg05697854	-3.69739
cg05714116	-0.335683
cg05727648	5.19596
cg05734154	-2.73466
cg05745845	-2.83254
cg05752118	-2.25163
cg05771157	1.43856
cg05899869	-4.54982
cg05908371	-3.47552
cg05914981	0.515089
cg05922058	-3.07798
cg05945275	-4.30727
cg05964227	-1.11806
cg05979855	-5.12168
cg05992515	-2.50884
cg06038213	-7.05943
cg06050193	-2.083
cg06098368	-3.62274
cg06120399	-3.79738
cg06164973	-0.336676
cg06195293	-1.60605
cg06235973	-2.58612
cg06254453	4.72264
cg06263461	1.54442
cg06287137	-3.20686
cg06289182	-3.4261
cg06324507	-4.17772
cg06326971	-1.884
cg06327621	3.56645
cg06346307	-2.33507
cg06348423	-2.9959
cg06371555	-0.961822
cg06392733	-2.96574
cg06405820	-4.97629
cg06417460	-2.13322
cg06419761	0.682104
cg06490951	0.053462
cg06516328	-2.05455
cg06532546	-3.93144
cg06542302	-1.99106
cg06551785	-3.47328
cg06603822	-4.09602
cg06606773	-1.40193
cg06613738	2.01454
cg06640206	-3.01885
cg06659144	-1.71193
cg06660664	0.112353
cg06671964	-2.99559
cg06732684	-1.15445
cg06741197	-1.25741
cg06741354	-4.43572
cg06752633	-5.41154
cg06767295	-1.7654
cg06841648	-4.69172
cg06863382	-6.33662
cg06868592	3.53611
cg06871246	-4.31882
cg06887778	-1.65803
cg06888270	-0.597672
cg06899551	2.49105
cg06902609	-3.10795
cg06920962	-1.92045
cg06925975	-0.729433
cg06963053	1.29211
cg06968294	-2.47888
cg06981716	1.73884
cg07007674	0.376257
cg07019599	-2.34133
cg07021644	-0.774804
cg07068768	-4.93229
cg07081759	-3.48433
cg07123132	2.62796
cg07126115	-3.30245
cg07155303	-2.3111
cg07176342	-0.0177461
cg07188645	-1.71058
cg07224221	-1.83085
cg07240834	3.25251
cg07240877	-0.223488
cg07251887	1.49286
cg07267067	-3.09422
cg07273675	-0.382076
cg07330481	-3.45874
cg07347959	-1.88285
cg07366660	-2.74076
cg07375851	-3.02446
cg07388468	-0.654983
cg07393322	1.81768
cg07405796	-2.63998
cg07408456	-4.42586
cg07417326	-1.88854
cg07440264	2.95628
cg07442889	-2.56338
cg07462861	-4.77463
cg07471018	-5.71882
cg07491399	-0.902125
cg07501043	-1.57788
cg07520673	-5.019
cg07555437	2.57116
cg07558894	0.670378
cg07562175	-0.307738
cg07567572	2.37078
cg07567777	1.10571
cg07579946	-1.85141
cg07586017	-2.26193
cg07685869	-1.48832
cg07717083	-3.9091
cg07741172	-2.13112
cg07768372	-3.30165
cg07839336	-2.16046
cg07874367	-0.436864
cg07940373	-2.58454
cg07951083	-2.83506
cg07954324	-3.36527
cg08043750	-1.75943
cg08072082	-3.17384
cg08084154	-2.15571
cg08097157	-1.54935
cg08104780	-0.230928
cg08105571	-0.4968
cg08132525	0.0559756
cg08201736	-0.49541
cg08246428	-2.60812
cg08250055	-1.05677
cg08284213	-5.86744
cg08290421	3.41963
cg08317243	-0.702322
cg08320359	1.51333
cg08327269	0.904444
cg08328160	-0.274244
cg08378598	0.906525
cg08405587	0.617972
cg08415986	1.81038
cg08417097	2.56226
cg08431427	-0.188403
cg08458252	2.74606
cg08468741	-2.05641
cg08469681	-0.985898
cg08530859	-3.52759
cg08602596	-3.55412
cg08608126	0.019027
cg08656816	-0.0997771
cg08761618	-1.7836
cg08764761	-1.82402
cg08777639	-2.08256
cg08845025	-5.11265
cg08852245	1.7773
cg08873209	0.973424
cg08903736	-0.0217474
cg08941457	-2.90001
cg08951273	0.57924
cg08951901	-3.94279
cg09009519	-2.38415
cg09054960	-0.260102
cg09102996	-4.92554
cg09173348	-3.90211
cg09179249	-2.3023
cg09183941	3.705
cg09195275	-7.6415
cg09196959	-3.71283
cg09219734	-1.97792
cg09220027	-0.348665
cg09249446	-0.564426
cg09351288	-2.06098
cg09354444	0.832538
cg09363128	-1.44542
cg09419978	-1.86294
cg09458323	-1.83823
cg09547777	-2.185
cg09557418	-1.09192
cg09564315	-2.72956
cg09578794	-3.72599
cg09610558	-2.34093
cg09658238	2.30142
cg09663701	2.32133
cg09687864	-1.33945
cg09707395	-2.05962
cg09739037	-0.734145
cg09744051	-0.0773165
cg09788217	-3.89615
cg09794469	0.283873
cg09798996	-1.1601
cg09909011	-1.19616
cg09942248	2.03773
cg10015500	-1.00025
cg10045321	-0.218849
cg10053369	-1.37101
cg10087755	-1.85597
cg10096873	-0.120557
cg10101074	2.57441
cg10108617	-0.540426
cg10109943	-0.0776077
cg10121457	-1.561
cg10185489	-0.90447
cg10210076	-3.09379
cg10211530	1.36661
cg10235892	-0.579377
cg10280636	-1.57401
cg10289080	0.883808
cg10298052	-0.104229
cg10315334	-1.36485
cg10317119	-1.28421
cg10377188	0.643796
cg10406153	2.09607
cg10409680	-0.950259
cg10439737	0.0978049
cg10453019	-3.77986
cg10457401	-3.38228
cg10500147	1.65141
cg10500909	-4.62828
cg10578187	-2.33921
cg10600367	-0.418354
cg10610685	-1.87985
cg10620273	4.25658
cg10647406	-3.69967
cg10655041	-1.69065
cg10677959	-3.02649
cg10679021	-1.38823
cg10696199	-3.38306
cg10726037	1.59583
cg10734448	-2.29485
cg10741333	4.14516
cg10742917	-4.60266
cg10888878	-2.29538
cg10895875	-2.95154
cg10910685	-2.95193
cg10976293	-5.139
cg11000292	1.81928
cg11038507	-3.18042
cg11042373	-0.811617
cg11085283	-0.873656
cg11141380	2.26845
cg11170179	-1.9181
cg11180306	-3.58156
cg11184497	-3.4421
cg11195360	-3.64071
cg11213892	-3.36677
cg11222217	-2.02798
cg11223315	-0.1747
cg11247304	-1.37996
cg11263994	-1.55657
cg11313429	-1.0473
cg11318772	-0.795964
cg11324259	-2.8858
cg11325576	-1.136
cg11329129	-1.75429
cg11361387	-3.06102
cg11397143	-0.782629
cg11459648	1.66556
cg11523020	-1.57662
cg11529250	-0.952025
cg11563915	2.97662
cg11565797	-1.77604
cg11619216	-2.79336
cg11632685	0.494611
cg11656521	1.96672
cg11701759	-0.29697
cg11703587	-2.01038
cg11724135	-2.74084
cg11757134	-3.05999
cg11846968	-1.48482
cg11854491	1.6839
cg11901188	-0.31599
cg11908384	1.10511
cg11934771	-2.3013
cg11942622	-2.45386
cg11943959	-0.754662
cg11993754	1.98608
cg12006425	-0.0908123
cg12009816	-1.49423
cg12040210	-4.88326
cg12095198	-2.4357
cg12097558	-2.06715
cg12119029	-1.75189
cg12141662	-3.09149
cg12177059	-0.866953
cg12201948	-1.83434
cg12205435	1.9899
cg12277789	-2.21803
cg12328890	-2.06144
cg12370326	-2.08176
cg12413918	1.32813
cg12455187	-2.89294
cg12479507	3.79601
cg12493058	-1.89627
cg12498859	2.74413
cg12507836	-1.46997
cg12527097	-2.3522
cg12549079	-2.35565
cg12629448	-4.4038
cg12759215	-0.645183
cg12801987	-2.06
cg12824719	0.873839
cg12826202	-0.317927
cg12836116	-2.27559
cg12865487	-1.33203
cg12874940	-1.89759
cg12897945	2.48755
cg12910087	3.36456
cg12918116	3.67719
cg12927772	-1.69013
cg12934433	-1.00414
cg12939283	-5.60276
cg12965927	0.127425
cg12989650	-3.05684
cg13015950	1.55933
cg13029013	2.24855
cg13129675	-5.69545
cg13150866	-3.45957
cg13252820	-3.04445
cg13263114	0.996064
cg13335691	-1.98711
cg13366731	3.51466
cg13392302	-2.44294
cg13417559	-3.02023
cg13420383	-3.07518
cg13425040	-1.32729
cg13433320	-1.42442
cg13436879	1.94702
cg13439114	-2.60872
cg13453904	-7.0494
cg13485320	-3.95617
cg13486950	-2.03452
cg13503915	-2.85423
cg13528895	-3.69215
cg13551814	3.15567
cg13555772	-2.4969
cg13575542	-2.79837
cg13589330	1.76536
cg13606255	-4.21171
cg13606421	-3.56472
cg13652169	-0.933303
cg13667021	-0.358496
cg13705284	-3.60377
cg13727362	4.42524
cg13802844	-0.917378
cg13806267	-1.11932
cg13830506	-2.59419
cg13834460	1.10556
cg13840252	-0.541949
cg13865012	1.59825
cg13869120	-0.858343
cg13869704	-0.546376
cg13912673	-3.46214
cg13972711	2.58932
cg13973771	-1.62908
cg13979085	-0.0219882
cg14013377	2.64814
cg14029580	-1.24712
cg14051606	0.417628
cg14063566	0.388306
cg14103106	-3.34303
cg14105637	-0.191366
cg14119792	-2.02464
cg14135214	-1.4532
cg14195351	-1.76381
cg14209583	-1.92372
cg14257369	3.09193
cg14259179	3.91673
cg14285533	-2.03309
cg14286439	4.06733
cg14307806	-0.786352
cg14310418	1.50027
cg14321742	-2.90863
cg14340630	-0.219853
cg14344712	-1.35602
cg14356799	-3.43329
cg14423177	2.91349
cg14430582	2.26316
cg14449910	0.497434
cg14496401	-0.686808
cg14574038	-2.33262
cg14577472	1.99255
cg14585288	-1.98007
cg14618604	-1.62886
cg14620221	-2.11756
cg14641018	-1.50299
cg14650226	-5.67883
cg14691671	-0.962511
cg14763874	-1.55936
cg14796230	-1.14617
cg14802400	-2.36983
cg14808890	4.70904
cg14907262	-2.93689
cg14917375	1.5107
cg14919490	-3.5846
cg14934396	1.64228
cg14944944	-0.557629
cg14974711	5.40062
cg14991110	-2.4268
cg14995507	1.43702
cg15001714	-3.06491
cg15015122	-2.09495
cg15021280	-3.96878
cg15066599	-1.32757
cg15069551	0.785677
cg15098809	-4.89316
cg15111386	0.090281
cg15161047	1.47845
cg15162417	-3.16915
cg15163719	-4.4543
cg15173428	-1.19269
cg15179955	1.52213
cg15183692	-2.26716
cg15226029	-2.68139
cg15246825	-1.74603
cg15304800	-4.20557
cg15323564	-1.34627
cg15335334	-3.2215
cg15349341	-3.49295
cg15352829	-0.170467
cg15386964	5.17717
cg15409237	-0.404592
cg15418419	-6.03796
cg15422382	1.37409
cg15448616	-0.427239
cg15457745	1.53932
cg15591938	-3.44782
cg15634083	0.16928
cg15657925	-2.21009
cg15684015	-2.0202
cg15684600	-1.58555
cg15712857	1.52011
cg15728861	1.25046
cg15739955	-2.46271
cg15767096	-2.04908
cg15777273	-2.94988
cg15790037	-0.206914
cg15834952	-4.71101
cg15840638	0.493923
cg15848350	-2.6358
cg15864418	-1.51124
cg15900188	-2.08724
cg15909725	-0.127989
cg15910208	-0.391607
cg15972425	-1.63148
cg15993401	-0.496315
cg15996480	-5.76171
cg16001613	-3.40678
cg16010301	-2.68939
cg16024932	0.541871
cg16050237	-3.81767
cg16053158	-2.80351
cg16065186	3.3497
cg16074180	-2.4472
cg16097539	0.663926
cg16129800	-0.173457
cg16140242	-3.45963
cg16150435	-1.70429
cg16167240	1.84126
cg16167741	2.61593
cg16167808	-2.8288
cg16173186	-2.00443
cg16181638	-0.134419
cg16195569	2.7842
cg16202734	-3.95079
cg16209444	-0.992758
cg16253463	-3.28189
cg16257341	-5.90335
cg16265348	-3.24343
cg16305983	-1.40662
cg16346422	-1.35203
cg16352928	2.51311
cg16389924	-1.68715
cg16404170	-2.58123
cg16407723	3.77232
cg16487280	3.04971
cg16497293	2.51281
cg16500018	2.06221
cg16567957	-0.404524
cg16571192	-1.12495
cg16587010	-1.80603
cg16587707	-4.58195
cg16597157	-5.46048
cg16602097	-5.64605
cg16612699	-0.303462
cg16662846	-0.686904
cg16685586	-1.40375
cg16696856	0.540647
cg16697438	-3.45346
cg16698814	-4.11133
cg16725865	2.66119
cg16726148	-0.205571
cg16762408	0.776561
cg16873863	-1.55564
cg16891104	-1.77062
cg16894211	-2.10644
cg16905280	-1.85055
cg16912030	-2.47592
cg16956201	-1.43153
cg16964535	0.401008
cg16970761	-2.70177
cg16972279	-3.97077
cg16980245	-4.42932
cg17007647	-4.93072
cg17023341	-1.94946
cg17038049	-3.57098
cg17083504	-2.77302
cg17087314	-1.38179
cg17088751	4.27055
cg17096289	0.232277
cg17105737	3.15828
cg17123468	-1.95197
cg17146473	-2.62698
cg17159843	3.82875
cg17193436	-1.50613
cg17199010	1.30283
cg17212698	-0.580285
cg17213699	0.869856
cg17270519	0.208886
cg17323974	-2.1883
cg17332573	4.94654
cg17382459	-4.04555
cg17473673	-2.84504
cg17481367	-1.79374
cg17601209	-3.39556
cg17631357	-3.3419
cg17663033	-3.31503
cg17720107	-4.96642
cg17752089	-1.48981
cg17766007	-0.493989
cg17770910	-0.646936
cg17784811	-3.69683
cg17818435	-1.47303
cg17829533	-2.07075
cg17852588	2.39707
cg17863326	-1.61694
cg17874413	-2.49977
cg17884201	-0.0720064
cg17891123	2.5991
cg17914595	0.225201
cg17915429	-0.761638
cg17919966	-3.57804
cg17947121	-1.21627
cg17951372	-1.20368
cg17958033	-2.46004
cg17974398	0.582896
cg18009321	-4.15758
cg18017294	-0.752546
cg18020334	-2.30964
cg18080401	-0.087982
cg18090147	0.548506
cg18139800	0.616418
cg18164349	-3.88751
cg18166564	-3.24261
cg18169289	-0.709835
cg18227843	-0.451158
cg18241647	-0.613675
cg18266001	-2.50832
cg18266971	-2.99346
cg18271964	-3.60423
cg18280507	-2.98397
cg18290789	-5.98658
cg18303019	-6.33522
cg18313137	-0.672611
cg18331554	-4.57155
cg18356130	-2.07141
cg18373961	-1.7536
cg18384168	2.756
cg18396660	-1.33296
cg18419977	-2.55514
cg18431486	-0.095965
cg18437710	-2.94717
cg18446110	1.74848
cg18449596	-4.4466
cg18450500	-2.10856
cg18458509	-2.96985
cg18486644	-3.04481
cg18495231	2.20671
cg18512232	-1.59416
cg18529415	1.063
cg18565783	1.62275
cg18607901	-1.5866
cg18618789	-1.95183
cg18623649	-2.43708
cg18630363	-2.17524
cg18703122	-1.65283
cg18707489	-2.28446
cg18726518	0.170238
cg18728699	2.18922
cg18747378	-1.73646
cg18752716	0.228484
cg18759066	-2.57467
cg18781966	-2.54316
cg18785300	-1.61444
cg18789887	-3.28095
cg18810244	-2.28057
cg18827221	-3.02229
cg18846954	-2.21767
cg18862562	-3.26249
cg18877862	1.55565
cg18891712	0.0927267
cg18947710	-3.77417
cg18954541	6.70854
cg18979589	-2.79452
cg18981338	-3.58634
cg19023847	-3.57238
cg19043798	-3.26605
cg19059132	-5.48002
cg19059861	-3.25523
cg19091146	-2.01359
cg19107641	-1.16146
cg19142054	-1.51976
cg19143722	7.75936
cg19203800	1.66735
cg19247350	5.90823
cg19253659	-1.73351
cg19263228	-3.71828
cg19307750	-1.26619
cg19346031	0.0532972
cg19356189	-4.29651
cg19362874	-3.61513
cg19403023	-2.68574
cg19411729	-2.26522
cg19421368	3.6523
cg19468528	-2.10438
cg19469654	0.9832
cg19534703	-2.57105
cg19537511	0.40664
cg19552440	-0.152094
cg19644449	-0.368831
cg19652694	0.0596952
cg19708213	-0.728712
cg19711579	1.68551
cg19736604	-3.68558
cg19778944	0.624749
cg19785759	-1.5656
cg19785810	-1.32058
cg19791048	-1.97938
cg19832832	-1.81956
cg19835040	-3.08597
cg19857564	5.29197
cg19865237	-2.01409
cg19872463	0.511422
cg19877103	-2.47898
cg19879189	-3.24779
cg19898038	0.0806313
cg19906550	-0.839911
cg19917650	-3.59568
cg19921353	-3.53356
cg19936584	-3.92691
cg19947171	-0.057872
cg19968619	-0.561064
cg20017761	-1.03613
cg20067334	-3.52112
cg20079922	-3.29236
cg20081344	-0.994977
cg20082916	-0.626245
cg20093718	0.125504
cg20099968	-4.96185
cg20112500	-3.04299
cg20128772	-2.98148
cg20151107	-1.55818
cg20157484	-1.48228
cg20160299	-0.469869
cg20185945	-2.24115
cg20249882	-0.780238
cg20281554	-3.29826
cg20281815	-1.50682
cg20295537	5.40731
cg20310608	1.19329
cg20323793	-2.79823
cg20331241	-2.86693
cg20343098	-4.3232
cg20353484	0.350984
cg20354929	-2.12888
cg20448791	-0.0470837
cg20465954	0.914046
cg20485165	-4.06689
cg20515823	-1.17496
cg20531035	-0.0240858
cg20555674	-3.11547
cg20591897	-3.92968
cg20597127	-2.38037
cg20636429	-4.49497
cg20638016	0.237487
cg20638582	-2.0419
cg20647962	0.37736
cg20661893	2.1478
cg20686010	-2.06277
cg20692181	-2.47186
cg20706071	4.33244
cg20709008	5.04802
cg20731110	-2.25933
cg20848343	0.692851
cg20850275	0.0125024
cg20858033	-3.78773
cg20893898	-1.34409
cg20905680	-1.14754
cg20954179	2.27799
cg20958486	-2.92256
cg20988960	-1.55648
cg21007318	1.10036
cg21019522	-2.08754
cg21036854	-0.572396
cg21072248	-1.58585
cg21076939	-1.10126
cg21077049	-1.54121
cg21087586	-2.95546
cg21151963	-2.45027
cg21182616	-0.587345
cg21251227	1.07348
cg21271423	-2.96771
cg21462693	-5.17531
cg21550446	0.28596
cg21559677	-0.527573
cg21663122	5.56795
cg21712512	-0.488726
cg21741689	-2.85524
cg21756765	-0.880881
cg21777015	-1.50416
cg21804327	-3.59187
cg21850038	-2.48366
cg21853021	-2.91005
cg21859216	-3.15772
cg21864519	0.640441
cg21869055	0.57823
cg21905167	0.394091
cg21985631	1.84052
cg21987422	1.76071
cg22012981	-1.05839
cg22031336	3.3263
cg22040301	-2.27133
cg22079120	-0.149468
cg22102663	0.89996
cg22215576	-4.83032
cg22273939	-3.75809
cg22310770	-0.444484
cg22320994	-3.36624
cg22322184	0.113042
cg22350358	2.90179
cg22359606	2.98224
cg22372131	-1.58557
cg22387550	-2.10798
cg22401272	-1.03131
cg22432982	-2.30616
cg22483030	-0.577107
cg22491225	3.50685
cg22546130	-2.11707
cg22556943	-1.56785
cg22645427	-3.38174
cg22692281	0.622091
cg22695986	-3.1514
cg22721007	5.46286
cg22773363	0.983282
cg22777668	0.928744
cg22793860	1.69075
cg22853713	-2.44052
cg22862961	-2.17708
cg22920041	-0.499661
cg22924585	-0.964161
cg22961241	-1.41036
cg23036136	0.866892
cg23039037	-1.93837
cg23043780	3.11078
cg23067317	-4.6614
cg23168040	-4.13805
cg23175613	0.11245
cg23190089	-2.95961
cg23198902	1.10199
cg23205401	-1.45052
cg23219305	2.16524
cg23313924	-1.9286
cg23329275	-1.78465
cg23333072	3.90414
cg23370883	-2.40519
cg23416895	-3.39488
cg23454282	0.921529
cg23480821	2.11261
cg23518439	0.189885
cg23523534	-0.721099
cg23527226	-2.26189
cg23591140	2.26641
cg23601416	-1.87381
cg23613219	2.2367
cg23670372	-2.20004
cg23679683	-2.17776
cg23702727	-2.26976
cg23705223	-0.291548
cg23731030	3.62831
cg23750365	-3.67909
cg23794579	2.58151
cg23833588	1.58562
cg23843505	2.11211
cg23855715	-3.95491
cg23889236	-2.38199
cg23903301	-0.184107
cg23925650	-2.70509
cg23934465	1.58547
cg23994683	-1.215
cg24027109	-3.53662
cg24111342	-1.84437
cg24117354	-0.157305
cg24131525	-1.77976
cg24155084	-3.32178
cg24174988	1.92049
cg24202936	-3.25216
cg24205048	-4.13206
cg24207176	-0.793413
cg24231513	-2.61761
cg24232092	-2.14834
cg24248329	0.89327
cg24272254	0.512176
cg24278504	-5.87191
cg24293689	-1.86693
cg24352530	3.75161
cg24472939	1.87443
cg24479032	4.94229
cg24480030	0.458062
cg24486810	1.3765
cg24512400	2.43977
cg24555600	-3.03694
cg24576494	-2.37173
cg24603028	-1.21745
cg24626581	-4.38849
cg24627332	2.37879
cg24649332	2.73097
cg24674703	-2.48283
cg24734657	-2.50239
cg24741101	-0.265004
cg24759919	2.72499
cg24790676	-3.68
cg24804765	-2.16484
cg24829483	-1.59521
cg24831862	-2.68787
cg24851364	7.10018
cg24865086	-2.84787
cg24869815	-1.50211
cg24877963	-2.84267
cg24910532	0.540799
cg24935976	-2.42357
cg24959264	-1.01862
cg24978630	7.2587
cg25022342	0.686259
cg25065518	-3.70618
cg25079847	0.242596
cg25084279	-1.35591
cg25102375	-1.66198
cg25106707	-2.74898
cg25123566	-3.9885
cg25141417	-1.61941
cg25148306	3.37338
cg25159149	-0.901863
cg25173961	-0.448646
cg25186680	1.04546
cg25206687	3.04925
cg25295218	1.30329
cg25338000	3.02474
cg25341687	-1.92737
cg25355501	-1.06475
cg25383323	-0.493237
cg25398378	-2.79432
cg25421594	-2.42202
cg25427871	-1.94927
cg25431026	3.91682
cg25455773	-1.65938
cg25497964	-2.76154
cg25517707	-3.48395
cg25554034	-2.74735
cg25577099	1.94412
cg25594307	-4.50587
cg25608871	0.420412
cg25618731	-3.92011
cg25729913	-0.701358
cg25877512	-3.14316
cg25886479	-2.89688
cg25964180	-1.92905
cg25977327	-2.5636
cg25991183	-3.25721
cg26067518	-4.76571
cg26074618	1.14768
cg26077062	-4.25535
cg26099051	-4.26267
cg26111030	1.45808
cg26137103	0.0426841
cg26233719	-1.15528
cg26238815	-3.59499
cg26255314	-1.41567
cg26260070	-2.38
cg26293182	5.44238
cg26312950	1.78451
cg26350754	-0.86409
cg26465214	0.0178575
cg26471121	-2.40658
cg26489994	3.12261
cg26508444	-4.74505
cg26520908	0.270103
cg26536164	-1.60513
cg26539688	1.37988
cg26540167	-2.12873
cg26552696	-2.18121
cg26580095	-2.03188
cg26612418	-3.95262
cg26636590	-1.0849
cg26649643	0.562971
cg26665035	-3.57314
cg26705472	0.0571392
cg26725354	-1.53637
cg26738010	-2.08769
cg26742989	0.64267
cg26748265	-4.73401
cg26793289	-0.408435
cg26810908	-5.94227
cg26862691	-3.30418
cg26866349	-2.10165
cg26884154	0.752235
cg26905720	-3.3633
cg26909988	-1.59443
cg26927231	1.43226
cg26929925	3.31075
cg26942943	1.96313
cg26994894	-2.00945
cg27005179	2.11358
cg27026192	-2.36153
cg27110938	-2.3471
cg27124462	-2.80038
cg27158481	1.102
cg27173292	-2.0038
cg27188827	-1.67989
cg27197088	-2.57594
cg27219972	-4.16725
cg27240402	-1.77368
cg27247253	-3.55878
cg27299949	-0.135765
cg27301655	-4.54324
cg27305662	-0.844707
cg27314569	2.44844
cg27322595	-1.1099
cg27334740	-2.68451
cg27347523	-0.159512
cg27352514	-3.23141
cg27358585	-2.76709
cg27385959	0.157311
cg27395922	-1.4745
cg27428414	-1.57598
cg27437413	2.54009
cg27450976	0.0620874
cg27502078	-3.674
cg27508769	4.07679
cg27510007	2.76248
cg27537915	-0.829307
cg27550982	6.91174
cg27561907	-0.10454
cg27571988	-3.37436
cg27590594	0.569539
cg27614309	0.753615
cg27650212	-0.0839601

## Sheet: 050
probe_id	median_change
cg00005297	0.814729
cg00040278	1.74873
cg00069642	0.518222
cg00081975	5.56946
cg00126034	1.49169
cg00126959	5.5428
cg00130808	3.45963
cg00238249	-0.644778
cg00242449	3.00815
cg00340855	-0.365334
cg00350942	0.906782
cg00396894	-2.63746
cg00441573	5.05868
cg00491418	-1.45815
cg00503539	5.26848
cg00531926	1.11679
cg00539386	1.93021
cg00548989	1.16877
cg00558689	2.26184
cg00598429	6.68971
cg00611485	1.13942
cg00626856	-1.23489
cg00728810	0.610516
cg00744413	2.52228
cg00795277	0.134035
cg00842325	1.85457
cg00885176	-0.556015
cg00916884	2.43937
cg00992297	3.70964
cg01022921	-1.2711
cg01029669	-0.472468
cg01052103	3.58858
cg01074928	3.53589
cg01151440	-0.0373975
cg01242619	3.23093
cg01244034	2.79325
cg01254555	0.214429
cg01279709	1.63195
cg01287811	3.6781
cg01300467	4.50576
cg01365762	2.88419
cg01388889	-1.66451
cg01420388	3.87991
cg01425054	-1.89034
cg01448258	5.41811
cg01462744	3.51682
cg01463146	1.68641
cg01466825	4.81204
cg01471240	1.1685
cg01557754	1.80739
cg01566127	7.34371
cg01634141	4.3038
cg01641455	0.744111
cg01649879	-0.972926
cg01684528	0.361176
cg01719529	3.20456
cg01800521	3.81082
cg01804048	1.43342
cg01883425	2.98113
cg01911708	3.04675
cg01918706	3.91834
cg01952931	0.907081
cg01974027	3.72353
cg01992424	1.85018
cg02009141	3.36524
cg02017282	7.60293
cg02024433	3.12154
cg02029212	3.81105
cg02030034	4.94775
cg02034516	1.1004
cg02039839	2.3428
cg02057469	3.24716
cg02062230	1.39708
cg02085077	2.03399
cg02134353	2.16103
cg02145916	2.74201
cg02160530	2.06778
cg02165799	0.280598
cg02166851	2.64814
cg02180737	-1.37803
cg02260340	1.8028
cg02285477	1.7998
cg02294791	0.83375
cg02308192	2.06305
cg02320820	1.46194
cg02323296	-0.131322
cg02340056	-2.45521
cg02342594	3.68392
cg02348151	4.20284
cg02349264	0.514806
cg02441711	1.79227
cg02525705	2.13811
cg02553663	1.6626
cg02570061	1.44233
cg02595922	1.56861
cg02689640	-2.82787
cg02736969	1.53338
cg02751503	0.148417
cg02780269	0.277284
cg02787991	2.10935
cg02852989	0.255235
cg02882448	3.14266
cg02886115	1.73034
cg02926368	3.10531
cg02942965	2.28084
cg02953912	1.00187
cg02973270	1.66212
cg03050096	-1.54954
cg03091374	-2.64781
cg03103218	0.858907
cg03109047	0.28867
cg03124532	1.95405
cg03143849	3.30683
cg03152785	1.10376
cg03186339	-0.259643
cg03186851	4.38059
cg03199124	3.70536
cg03259703	-1.89997
cg03265956	0.573068
cg03311185	1.82957
cg03440267	1.6749
cg03453917	0.272794
cg03457528	2.02413
cg03466930	1.55648
cg03483727	1.16238
cg03552658	2.59847
cg03587843	-0.617855
cg03589296	2.94151
cg03603642	2.81043
cg03613649	2.73599
cg03617813	-2.46943
cg03668475	2.57655
cg03695693	0.626231
cg03717555	0.850568
cg03718284	3.47459
cg03725115	0.20656
cg03732762	1.25054
cg03800253	-2.11596
cg03861143	-1.71437
cg03867475	1.91159
cg03876116	4.65285
cg03908015	4.24529
cg03930209	-1.06363
cg03965044	5.53118
cg03969996	5.22609
cg03986578	1.63691
cg03993263	-0.29624
cg04093149	6.45778
cg04153495	4.58195
cg04175782	1.76182
cg04211632	2.03912
cg04255201	2.35329
cg04288999	1.49987
cg04290747	-0.342947
cg04305133	4.07348
cg04305858	4.4907
cg04325130	-4.40154
cg04374102	0.673818
cg04444868	3.7639
cg04456021	1.15045
cg04477203	3.08732
cg04498252	-0.699879
cg04550237	0.37419
cg04555779	-0.418674
cg04582871	2.03123
cg04645567	2.19792
cg04663203	3.37382
cg04670666	1.87873
cg04672182	-1.87607
cg04689048	2.85275
cg04711063	2.69957
cg04753936	-0.166336
cg04807188	2.59859
cg04823720	2.23212
cg04833514	4.58297
cg04856689	-0.272007
cg04944873	0.213454
cg04972348	3.54155
cg05006755	7.75521
cg05010865	0.674264
cg05029558	-1.54771
cg05097930	-1.69317
cg05227078	1.44099
cg05261559	2.86592
cg05261702	4.50428
cg05272960	2.98006
cg05345286	1.90632
cg05356163	1.1076
cg05367432	2.61786
cg05384135	0.0543177
cg05398773	2.78799
cg05429955	2.91721
cg05432973	0.41644
cg05442477	1.45971
cg05522774	2.77251
cg05543419	2.59347
cg05581701	2.31914
cg05599550	2.84376
cg05675373	3.43024
cg05681148	1.19958
cg05720454	1.37308
cg05747390	2.71998
cg05768532	2.43932
cg05796704	4.59263
cg05819224	-2.68085
cg05836659	3.93208
cg05877497	1.99236
cg05898102	1.4663
cg05949800	0.585072
cg05978446	1.42109
cg05980782	0.385794
cg06029935	3.89251
cg06049781	4.68077
cg06056346	2.56165
cg06093379	1.78666
cg06106763	0.631477
cg06138226	0.839623
cg06147196	-2.18865
cg06251395	4.19296
cg06324957	0.953849
cg06417237	4.34704
cg06462874	2.20228
cg06534518	2.17736
cg06570025	0.278327
cg06570818	5.03396
cg06579756	2.09731
cg06618097	2.48512
cg06618740	2.68668
cg06688989	3.5664
cg06691943	1.44404
cg06785746	1.63093
cg06838921	1.73294
cg06854084	4.04352
cg06897927	1.65404
cg06918239	1.91795
cg06950730	2.66364
cg07091548	-0.975101
cg07098966	1.43957
cg07126399	-1.61434
cg07216258	3.10219
cg07244649	0.668877
cg07413497	3.22436
cg07426195	4.39831
cg07443485	3.54891
cg07482220	4.3985
cg07569219	5.99407
cg07598407	1.9865
cg07628084	-3.20274
cg07659975	2.75313
cg07692489	1.72845
cg07711890	2.28016
cg07750969	3.51959
cg07769176	0.0355778
cg07778819	3.7286
cg07782603	-3.21778
cg07879727	0.585675
cg07882850	0.809963
cg07968224	3.74754
cg07975032	0.288547
cg07981471	4.80558
cg08005774	-0.557416
cg08014994	3.83309
cg08049198	3.50061
cg08064292	5.62887
cg08066497	2.64565
cg08079136	3.2058
cg08090385	2.031
cg08105352	-0.086645
cg08111446	2.37054
cg08137852	-1.72093
cg08167722	0.913177
cg08180063	0.432004
cg08202444	0.866067
cg08248181	2.56046
cg08262608	-2.35597
cg08272286	3.85891
cg08305796	1.9741
cg08325813	2.80754
cg08334153	1.65135
cg08346097	2.94243
cg08382226	0.997503
cg08450897	3.74899
cg08474826	1.49957
cg08476224	1.60471
cg08504601	2.55023
cg08587480	0.125978
cg08681790	0.745124
cg08763272	1.15401
cg08844365	-5.50548
cg08847533	2.66548
cg08860546	0.0265614
cg08897388	-1.68102
cg08899786	3.86754
cg08909802	1.74007
cg08918013	4.06212
cg08998967	3.04831
cg09035349	3.51985
cg09043226	2.68638
cg09105802	-0.774942
cg09125316	3.36844
cg09150559	-1.09312
cg09155362	2.8736
cg09196386	0.806811
cg09211399	1.48913
cg09228303	2.84414
cg09235837	0.501994
cg09252495	2.02734
cg09272748	2.98541
cg09301199	4.43812
cg09326440	3.06004
cg09378940	2.12706
cg09390181	-4.51895
cg09462924	4.69109
cg09471887	1.64741
cg09575189	-1.45732
cg09590840	-1.64843
cg09609649	2.2419
cg09620840	5.31111
cg09672187	-2.84657
cg09719149	1.70002
cg09760217	1.72654
cg09780039	0.180061
cg09788492	1.94046
cg09793394	2.82765
cg09908110	3.32639
cg09942364	0.765196
cg09944325	1.80496
cg09945151	-0.0774949
cg09984469	0.022451
cg09996240	2.8842
cg10023837	4.30093
cg10124767	2.46667
cg10125625	6.26037
cg10130564	2.1938
cg10139614	3.38503
cg10165894	1.46249
cg10166697	-0.81872
cg10183001	-0.214802
cg10249734	2.6348
cg10278699	1.11214
cg10307580	2.06551
cg10393931	0.25641
cg10413224	2.7196
cg10457005	3.44918
cg10491556	0.685718
cg10520331	-2.33032
cg10538151	4.07553
cg10559233	-2.16619
cg10604918	3.72235
cg10612274	0.915357
cg10621012	1.27226
cg10638599	0.786553
cg10638827	1.60977
cg10711775	1.26599
cg10715527	0.417003
cg10782975	1.03722
cg10794439	1.48394
cg10805615	0.362653
cg10883901	3.12788
cg10910512	-3.51646
cg10945180	1.09205
cg10948070	-0.265473
cg10962535	4.25577
cg10987289	2.36528
cg11023328	2.19265
cg11043450	3.96787
cg11078433	2.10173
cg11118871	2.43776
cg11136562	1.74767
cg11142826	1.25064
cg11171778	5.8623
cg11183632	5.98081
cg11197150	3.13204
cg11224624	1.03055
cg11226415	1.64378
cg11232944	-4.33599
cg11245657	0.795711
cg11279838	-2.45419
cg11309342	2.30011
cg11313446	0.577178
cg11338426	0.455865
cg11368628	-4.08614
cg11410682	3.08751
cg11433622	0.611076
cg11478273	-0.196722
cg11506733	0.643287
cg11517094	1.26381
cg11594821	0.444565
cg11603328	-1.26189
cg11615066	0.324067
cg11628754	0.341351
cg11633600	6.35668
cg11638716	0.604501
cg11667847	4.45991
cg11731737	2.85115
cg11737742	0.742967
cg11748936	1.65288
cg11760414	3.82085
cg11775292	1.55991
cg11785192	4.0706
cg11819639	3.03185
cg11832956	1.49057
cg11858114	4.71294
cg11861562	2.44748
cg11893951	3.42168
cg11944284	1.87842
cg11958080	2.78962
cg11960001	1.53047
cg11965311	4.95738
cg11983506	1.69611
cg11986813	6.94816
cg11995506	2.22641
cg12016107	0.154482
cg12021882	-0.142763
cg12133952	2.75625
cg12137286	3.77375
cg12162682	3.24607
cg12193927	1.35836
cg12244288	0.0141337
cg12298321	0.280036
cg12352960	2.85772
cg12368090	0.542755
cg12379948	2.71143
cg12424921	2.80756
cg12451836	-3.71892
cg12462991	2.33432
cg12480416	2.21905
cg12553198	2.76127
cg12633356	-1.78388
cg12658972	2.76354
cg12700271	1.56788
cg12770728	2.83328
cg12781086	2.54489
cg12918895	2.03627
cg12940104	1.66587
cg12946225	3.86633
cg13007871	0.357633
cg13038216	0.411806
cg13080626	1.18036
cg13124263	3.44435
cg13194425	2.93891
cg13223754	4.07405
cg13229980	3.38542
cg13298859	-0.361079
cg13310554	0.68796
cg13383842	1.27027
cg13395333	3.23467
cg13437525	-1.52699
cg13459349	1.50327
cg13462398	0.99805
cg13487553	3.17672
cg13492227	1.15594
cg13494334	1.06174
cg13521908	0.0366612
cg13529662	2.74544
cg13603914	1.40766
cg13623351	1.31945
cg13725958	4.01589
cg13762704	-3.73352
cg13763617	4.39732
cg13784855	1.6044
cg13811969	3.21424
cg13938098	-3.73352
cg13947929	2.54825
cg13952954	1.10878
cg13998093	6.81174
cg14036880	0.810782
cg14042128	0.892982
cg14047667	1.14301
cg14051264	-1.05763
cg14062261	-3.78379
cg14063191	4.38855
cg14089692	2.1678
cg14099335	3.4823
cg14132167	1.72656
cg14137646	2.33155
cg14148253	2.00268
cg14158594	0.278413
cg14219242	1.30759
cg14249155	0.801558
cg14289461	-2.69893
cg14389341	0.613262
cg14426084	3.10923
cg14476334	1.03599
cg14505792	1.8071
cg14554871	-0.494758
cg14574582	0.418066
cg14622870	0.251643
cg14663510	2.28883
cg14771938	3.8384
cg14849431	4.45802
cg14866032	-2.329
cg14877226	2.41878
cg14932237	6.07425
cg14942542	3.70289
cg15043642	2.73306
cg15068733	0.393914
cg15089892	1.36176
cg15118824	5.286
cg15124201	4.02516
cg15173196	1.25253
cg15237742	7.08153
cg15307169	2.35208
cg15330921	2.5904
cg15413107	0.888286
cg15414773	0.900834
cg15534755	2.47963
cg15559926	2.3447
cg15590338	-2.89236
cg15665970	0.0939937
cg15675653	4.0963
cg15694585	1.60516
cg15755406	2.87772
cg15816267	1.08693
cg15817605	1.8824
cg15821716	1.91099
cg15893431	4.94642
cg15974634	3.1494
cg15978039	0.508325
cg15982308	3.25816
cg15991309	1.59757
cg16022317	1.53347
cg16055334	2.56484
cg16077279	8.65464
cg16128920	-0.596453
cg16178603	1.84954
cg16189024	2.2414
cg16201841	0.471936
cg16235371	1.44577
cg16238921	2.5234
cg16267162	-0.88059
cg16363680	5.20573
cg16382322	2.95826
cg16404342	4.65648
cg16423461	4.68452
cg16440629	1.24147
cg16524733	1.74692
cg16530177	2.25986
cg16584020	0.430602
cg16617301	3.95636
cg16657886	-1.5307
cg16758314	2.14697
cg16850173	5.07369
cg16982073	-0.832421
cg16993579	4.71817
cg17016394	3.14083
cg17053251	-0.292148
cg17107572	0.803344
cg17188367	1.63546
cg17199631	0.322691
cg17217879	-3.69483
cg17223189	1.974
cg17261830	1.64645
cg17265994	3.56777
cg17271875	1.4216
cg17340492	-0.311245
cg17359092	2.74643
cg17454831	0.929894
cg17455891	3.80162
cg17604655	-2.63871
cg17656213	1.17939
cg17657037	1.07527
cg17759443	1.53539
cg17777933	-2.22472
cg17863168	0.155229
cg17886457	0.856288
cg17945976	0.806452
cg17960516	1.94948
cg18030834	3.1509
cg18080303	-4.71563
cg18105842	1.50561
cg18122696	-0.723002
cg18131851	1.28982
cg18183435	0.877654
cg18183642	4.23202
cg18184349	1.67122
cg18191873	2.7036
cg18403673	1.80551
cg18545771	2.68627
cg18602667	0.40292
cg18685408	1.69161
cg18693627	2.43647
cg18709349	1.5993
cg18730733	1.16752
cg18738814	2.76408
cg18891141	2.94935
cg18909924	3.00331
cg18912001	-0.416301
cg18928683	3.47142
cg18937321	1.1882
cg19007101	2.45311
cg19056772	1.58984
cg19242378	1.70832
cg19248656	5.13943
cg19404582	-1.22213
cg19427660	1.17264
cg19459332	4.1657
cg19564098	1.09735
cg19592564	-0.62917
cg19632760	-0.590358
cg19643390	3.44522
cg19725675	3.40828
cg19743781	-0.484501
cg19845715	2.84814
cg19947904	2.08616
cg19973884	0.304903
cg20008357	1.04489
cg20034372	0.862274
cg20071051	1.22161
cg20099054	5.61984
cg20185617	0.0541548
cg20295992	-0.0946228
cg20340508	5.85956
cg20381092	3.06735
cg20403498	1.14257
cg20534075	3.97629
cg20544307	1.17198
cg20546365	2.08315
cg20633883	2.19852
cg20640153	4.04249
cg20644330	4.17958
cg20656621	5.67835
cg20662397	2.8259
cg20844821	-2.2247
cg20980321	1.09038
cg21097640	1.06784
cg21133933	0.569074
cg21176130	4.53712
cg21183329	0.926981
cg21230021	-3.14757
cg21252596	2.64352
cg21292025	3.74191
cg21306072	3.08796
cg21475076	1.48704
cg21513757	2.41256
cg21515751	5.28153
cg21531604	1.24994
cg21544658	-1.53898
cg21554895	1.3338
cg21569006	1.71878
cg21690947	3.98253
cg21718087	2.74717
cg21733154	2.27798
cg21758773	-0.586671
cg21767563	-4.29083
cg21792150	0.385731
cg21794048	2.12733
cg21799346	6.58273
cg21949097	3.2477
cg22126965	0.482131
cg22333888	0.865097
cg22352152	4.37938
cg22384923	2.60843
cg22531105	4.50332
cg22540115	6.67445
cg22617608	1.62422
cg22673001	3.44437
cg22697136	4.7162
cg22727304	1.49953
cg22782812	1.14562
cg22796860	0.335127
cg22856324	8.89262
cg22871949	-1.45675
cg22928599	2.78344
cg22937804	-1.9046
cg22952566	4.62542
cg22979783	9.18611
cg23003832	1.67099
cg23037648	2.29593
cg23134718	0.17007
cg23146358	3.98033
cg23158347	2.94853
cg23260699	-0.553277
cg23274582	5.35043
cg23283234	0.679997
cg23340875	0.920171
cg23419490	0.712882
cg23464264	4.36577
cg23497016	4.89175
cg23521457	-0.701393
cg23593145	1.51557
cg23623714	3.19938
cg23672472	3.7472
cg23716779	0.0649654
cg23757474	0.799984
cg23757738	2.41431
cg23942897	0.727395
cg23972738	1.69163
cg24063856	3.0572
cg24094675	4.49291
cg24153071	6.20897
cg24154699	-2.39172
cg24206161	1.22733
cg24315877	-0.513873
cg24317725	1.90366
cg24331162	-1.14804
cg24353392	0.025314
cg24394631	4.2835
cg24408213	1.16803
cg24408656	3.88136
cg24425483	2.61127
cg24511951	1.96323
cg24599205	2.25345
cg24617155	0.0379391
cg24638203	3.35679
cg24664312	0.18698
cg24691656	1.54894
cg24714106	0.399156
cg24718465	4.40443
cg24788019	3.28656
cg24854080	1.795
cg24874478	0.184787
cg24933925	4.46197
cg24935773	3.01727
cg24990131	2.64778
cg25113410	1.12733
cg25120210	0.25021
cg25154455	-1.99022
cg25201881	6.42241
cg25237365	2.10806
cg25254074	3.87704
cg25293221	3.23726
cg25337795	5.71593
cg25393792	2.83019
cg25430671	2.05156
cg25471724	1.79817
cg25563256	1.87022
cg25604739	5.25389
cg25622036	4.25037
cg25664704	0.424512
cg25733934	1.89567
cg25752723	5.26984
cg25806524	-0.519942
cg25837277	3.55586
cg25905184	1.63101
cg26073815	2.78261
cg26075747	1.6002
cg26175526	2.47614
cg26195178	-1.5991
cg26214645	2.37557
cg26333317	-3.68398
cg26340737	4.24658
cg26399396	3.98724
cg26416491	0.775577
cg26473272	-3.06494
cg26475688	2.83324
cg26537478	3.15794
cg26542980	2.94669
cg26566898	0.773082
cg26568669	3.18883
cg26569469	3.30955
cg26575738	1.35589
cg26607670	-0.103647
cg26735846	3.32114
cg26754510	0.0843369
cg26770917	1.22733
cg26778001	-4.11322
cg26781303	6.17792
cg26811852	1.59375
cg26956444	3.61581
cg27040005	1.03876
cg27097018	1.96947
cg27124774	2.89176
cg27200446	0.937021
cg27222669	1.82533
cg27237300	5.7135
cg27262702	1.63838
cg27280904	1.4866
cg27303654	0.807229
cg27303982	5.54512
cg27304110	3.52919
cg27322556	4.53662
cg27346528	1.78564
cg27370696	5.52776
cg27454894	2.24717
cg27485411	1.36131
cg27536028	3.89769
cg27539527	-2.49913
cg27551605	3.08306
cg27579532	-0.26669
cg27601582	1.87012
cg27618939	-0.699675

## Sheet: 052
probe_id	median_change
cg00035000	1.72886
cg00037952	0.0699548
cg00064840	2.59744
cg00083700	2.83613
cg00091986	2.79587
cg00105253	1.64552
cg00117172	6.37255
cg00128812	0.0644631
cg00187933	1.60504
cg00202166	-0.769161
cg00204501	0.139043
cg00215758	1.99078
cg00236831	4.98542
cg00247599	3.99956
cg00266983	2.84861
cg00280220	4.21165
cg00281977	5.00004
cg00300822	2.47614
cg00331226	3.88449
cg00336164	6.61237
cg00354641	-1.76593
cg00369333	1.70779
cg00400948	-0.197428
cg00404025	-2.80996
cg00426921	1.94396
cg00495988	2.78981
cg00578614	1.96762
cg00583733	1.67267
cg00601836	5.7071
cg00604410	2.43431
cg00611614	1.61914
cg00655307	0.950206
cg00667360	1.91489
cg00689211	3.04634
cg00716277	1.49226
cg00729875	1.50425
cg00738841	3.26327
cg00739644	1.50787
cg00765710	2.28647
cg00767000	5.15506
cg00799826	2.56576
cg00810208	0.801292
cg00856278	1.74341
cg00867080	3.1742
cg00889627	-2.22776
cg00920970	2.70564
cg00942918	0.353825
cg00973426	0.0878822
cg01011619	2.17715
cg01033865	-0.248099
cg01036509	1.23612
cg01046376	1.9859
cg01088352	2.15367
cg01132064	1.51267
cg01133705	1.21957
cg01165575	2.4365
cg01178121	0.036577
cg01230250	0.100956
cg01234044	2.50569
cg01274715	1.06849
cg01289103	1.88107
cg01349775	4.64039
cg01362522	1.08358
cg01381613	2.38738
cg01382153	4.27127
cg01394671	0.96706
cg01405147	-2.31577
cg01406416	2.62385
cg01408571	3.02977
cg01438286	3.32483
cg01451760	2.48027
cg01456572	5.21735
cg01501915	5.83298
cg01502396	1.80394
cg01521220	4.42243
cg01572696	4.74514
cg01574663	1.60574
cg01576737	-0.248527
cg01582980	5.91135
cg01630982	-0.776458
cg01677248	1.33475
cg01698298	3.98139
cg01701555	1.55061
cg01706445	0.940738
cg01708411	1.34058
cg01708427	-2.32886
cg01715172	0.486292
cg01749213	-0.147023
cg01751470	0.530809
cg01761662	0.999686
cg01777019	0.0208475
cg01851450	3.57427
cg01862172	2.82435
cg01868487	-0.332884
cg01892997	-0.558426
cg01949798	2.82863
cg01951671	-1.08084
cg01962146	3.35829
cg01969184	-3.87285
cg01981762	2.0759
cg01986682	2.9741
cg01988136	2.15495
cg02003167	2.74292
cg02007493	5.72206
cg02059047	1.84649
cg02080641	1.01604
cg02081198	1.52725
cg02112616	1.52593
cg02140559	0.0982144
cg02147681	3.64179
cg02151816	-0.936579
cg02152739	3.69487
cg02172652	6.09124
cg02193611	2.86981
cg02202141	0.0526024
cg02215641	6.9215
cg02237906	4.15701
cg02238407	3.0741
cg02248826	7.68172
cg02272395	3.05828
cg02273392	2.71354
cg02275737	1.12317
cg02285263	2.21652
cg02297063	9.49091
cg02301724	0.716601
cg02304427	2.51333
cg02317742	0.0414778
cg02329117	1.05055
cg02417663	0.31782
cg02424835	0.559613
cg02436004	0.949465
cg02459529	-0.180549
cg02463329	2.38009
cg02473781	0.0172733
cg02496234	-0.53406
cg02512902	-4.19972
cg02537838	-3.59106
cg02538901	1.27293
cg02566288	0.781552
cg02566952	7.14873
cg02605776	-1.32568
cg02638057	1.02838
cg02640572	-0.523989
cg02660895	0.0881538
cg02664328	-0.146916
cg02692952	-0.0119143
cg02696047	5.32536
cg02706649	4.52848
cg02707098	3.90573
cg02718516	3.00951
cg02720618	3.37317
cg02726617	1.74701
cg02759751	1.84089
cg02798899	3.23867
cg02834747	3.96866
cg02838118	3.74073
cg02856377	1.59551
cg02863489	-2.972
cg02865822	3.91036
cg02869459	6.29255
cg02883666	-1.73177
cg02891495	1.32231
cg02956372	2.89438
cg03002352	3.20225
cg03002695	-1.50609
cg03033688	-1.33978
cg03036514	0.484263
cg03052632	1.17242
cg03081902	1.23467
cg03099771	0.150496
cg03128635	1.60174
cg03131272	2.17415
cg03132773	0.89777
cg03136962	0.616769
cg03147750	2.17519
cg03148427	1.59598
cg03161190	1.14976
cg03178838	4.72977
cg03190371	5.56254
cg03208889	-4.09303
cg03242909	-0.954397
cg03245734	1.84159
cg03258472	4.02282
cg03277153	0.0238698
cg03300589	2.65413
cg03322424	2.50927
cg03325733	2.74367
cg03328201	4.16094
cg03356778	5.18121
cg03359095	-2.46731
cg03361379	1.79352
cg03361810	4.95069
cg03373466	1.29472
cg03397575	2.1762
cg03455276	-0.752818
cg03459567	4.54423
cg03480935	2.1662
cg03483632	2.66882
cg03503634	0.136288
cg03553308	0.973576
cg03563630	2.55936
cg03565777	4.29009
cg03566418	1.91003
cg03576787	0.744294
cg03611151	5.78683
cg03635649	0.616184
cg03695236	3.51764
cg03713642	4.13891
cg03720762	2.00161
cg03732728	-0.574968
cg03757784	2.92713
cg03774288	-3.09465
cg03803861	3.82366
cg03842025	2.55274
cg03852670	1.80327
cg03863817	0.0956048
cg03904220	0.596363
cg03923934	1.19796
cg03932361	3.72576
cg03936495	4.04965
cg04016431	4.22515
cg04017555	2.75014
cg04018533	0.368314
cg04022063	0.443601
cg04024481	1.71573
cg04052706	3.71941
cg04063945	6.75446
cg04080057	3.39283
cg04088773	0.559039
cg04113075	1.14028
cg04124626	-1.01845
cg04154276	2.65165
cg04163475	4.26504
cg04201253	5.33973
cg04211829	0.878691
cg04217539	-4.76327
cg04223988	-0.00163406
cg04237666	2.04924
cg04282607	1.84277
cg04299274	-1.1865
cg04306817	2.79025
cg04328703	6.29326
cg04334417	0.828744
cg04367206	3.89162
cg04372321	5.77518
cg04372863	0.21141
cg04416734	1.41793
cg04508482	1.38262
cg04535578	2.56269
cg04539574	5.5836
cg04567315	-0.0497033
cg04573276	1.92599
cg04639174	3.4633
cg04667640	3.62311
cg04677061	1.51122
cg04719435	1.95276
cg04749316	-2.06603
cg04774621	-5.92344
cg04781796	-1.62719
cg04784471	-0.699361
cg04804377	1.46878
cg04879281	2.66972
cg04906656	-0.268514
cg04920917	1.89687
cg04947949	-1.06539
cg04969688	1.36403
cg04996300	1.04697
cg05005308	-0.427192
cg05017656	4.1348
cg05021846	5.4958
cg05031016	0.508183
cg05039475	1.98567
cg05045210	0.59425
cg05070742	4.61334
cg05104685	-2.0296
cg05119831	0.0632376
cg05166871	3.39465
cg05171584	3.81561
cg05185634	-3.35963
cg05190577	3.44074
cg05233310	-3.811
cg05235143	1.00534
cg05246522	-3.60726
cg05249271	-0.500935
cg05299387	1.81452
cg05327835	10.9586
cg05384271	1.71595
cg05385260	2.09821
cg05420134	-1.27958
cg05429686	-0.593496
cg05520336	3.16605
cg05525812	5.06904
cg05563672	4.72975
cg05569203	2.25292
cg05578358	0.76922
cg05585924	-0.524631
cg05596319	1.3684
cg05670602	1.27365
cg05672616	2.30413
cg05702052	-1.69644
cg05720640	2.95301
cg05739167	4.04763
cg05756489	5.65168
cg05784862	-3.00567
cg05836145	3.45611
cg05893674	-1.26361
cg05938628	-0.457761
cg05944174	1.53425
cg05958127	2.43286
cg05980158	-0.397931
cg06035702	3.94237
cg06053738	4.7142
cg06112708	1.378
cg06142735	-0.227271
cg06143732	3.82303
cg06154311	-2.73037
cg06175907	0.143084
cg06176592	0.356433
cg06207052	1.85736
cg06207804	1.36247
cg06251764	2.48058
cg06265809	-5.64042
cg06282270	6.71384
cg06287775	5.39706
cg06291867	7.34354
cg06325472	0.586206
cg06328674	-1.16621
cg06365161	4.61942
cg06376138	1.7137
cg06386028	1.26921
cg06387459	1.24886
cg06411901	1.73348
cg06433694	2.23764
cg06435765	1.4295
cg06448090	2.98557
cg06457713	4.73733
cg06490988	2.24153
cg06526872	3.24833
cg06555227	3.47474
cg06561835	3.94771
cg06572563	1.68228
cg06582371	3.34087
cg06607764	0.506703
cg06609098	5.59255
cg06634887	6.7232
cg06699987	0.301219
cg06700877	0.979176
cg06705237	4.13061
cg06733470	0.193402
cg06753050	-0.815675
cg06766307	1.8557
cg06775073	1.86645
cg06806958	3.68373
cg06825039	4.03843
cg06844012	2.16262
cg06851900	0.562981
cg06964541	-3.3116
cg07016590	0.840111
cg07019072	0.787647
cg07025134	3.1072
cg07051796	0.0118696
cg07067710	3.52194
cg07078645	1.89106
cg07081739	-1.57065
cg07090813	4.5714
cg07092212	0.810421
cg07097005	3.55669
cg07109238	4.75565
cg07118866	-0.297933
cg07121644	2.13315
cg07143841	1.18868
cg07148296	0.17404
cg07170183	3.02427
cg07178031	3.79455
cg07209567	2.86357
cg07217935	-2.91134
cg07230581	1.17773
cg07262635	1.27636
cg07275152	0.117249
cg07286457	2.85898
cg07291601	0.0453937
cg07293320	0.534217
cg07302626	3.14114
cg07324594	0.174461
cg07333314	-0.710666
cg07345108	-2.98258
cg07356555	-0.414808
cg07402729	4.89736
cg07433411	-2.47452
cg07460992	2.69892
cg07477090	0.670191
cg07485357	3.66831
cg07603922	2.15634
cg07621104	4.49413
cg07627706	1.02999
cg07632106	3.42633
cg07646791	2.34633
cg07648456	2.76511
cg07659140	0.911945
cg07677856	1.10153
cg07688988	5.94873
cg07690326	3.72447
cg07701567	-0.421967
cg07709606	1.85457
cg07723864	-2.77644
cg07737503	2.59863
cg07783134	-0.129065
cg07849997	4.84171
cg07873900	-0.157269
cg07875261	3.98345
cg07898713	5.0427
cg07906520	0.422755
cg07920092	3.9987
cg07920930	1.27528
cg07946035	1.41416
cg07949720	-2.13202
cg07960762	0.843614
cg08017880	1.59342
cg08030987	0.895308
cg08040740	-1.2615
cg08047426	-0.932224
cg08078636	2.03444
cg08080145	1.24409
cg08151200	4.84715
cg08151498	-0.214248
cg08160350	2.15545
cg08177264	-1.41012
cg08196512	1.85013
cg08196561	2.30206
cg08209133	4.32625
cg08214995	5.04175
cg08257967	0.795147
cg08299454	5.87818
cg08302300	-4.12319
cg08321867	-0.213794
cg08332990	2.07134
cg08358964	3.68134
cg08390786	1.74324
cg08457011	2.93836
cg08504214	0.0969303
cg08506775	0.287181
cg08512078	0.289156
cg08539841	5.44423
cg08541521	1.0905
cg08557523	0.331002
cg08575268	4.79608
cg08582038	-3.14973
cg08686210	0.640913
cg08692175	0.29362
cg08692430	0.716436
cg08696568	0.334416
cg08704681	6.50985
cg08714753	1.62988
cg08747892	1.04584
cg08791395	-0.0970986
cg08856163	1.24169
cg08884395	3.19133
cg08937407	1.72948
cg08955941	5.18737
cg08972579	3.325
cg09025040	0.69768
cg09031823	1.92909
cg09077752	2.80071
cg09119433	0.559054
cg09120320	1.42728
cg09144709	1.19533
cg09185829	2.81668
cg09191731	0.599237
cg09198782	1.14331
cg09208302	3.78214
cg09213165	-4.65985
cg09235308	1.26398
cg09247692	2.49026
cg09319202	1.34171
cg09330153	1.44681
cg09332353	-0.00880225
cg09357438	3.41209
cg09363604	1.3212
cg09371530	-0.868903
cg09382492	-0.502991
cg09396217	3.39618
cg09405083	1.44419
cg09406760	2.12603
cg09436743	1.62384
cg09458443	1.99996
cg09479906	-0.366377
cg09485007	4.28135
cg09495643	4.8347
cg09499856	5.43385
cg09514904	-2.62866
cg09574819	3.20467
cg09575472	-1.96048
cg09580336	5.8153
cg09599130	2.68054
cg09617229	-0.325153
cg09648315	4.82432
cg09662694	1.02308
cg09676684	1.69219
cg09725772	-0.3471
cg09734965	6.72794
cg09735274	0.615072
cg09761352	1.60724
cg09791883	0.377699
cg09852798	0.232485
cg09858224	3.72008
cg09897604	-1.50772
cg09965939	-0.32138
cg09984545	1.75498
cg09984759	4.87878
cg09984810	-0.928782
cg10000246	-0.17289
cg10026389	2.59863
cg10050661	3.13624
cg10103580	0.154729
cg10107434	2.30062
cg10110002	2.75053
cg10118545	4.01945
cg10124710	6.25354
cg10151454	-1.09561
cg10160713	2.58167
cg10167837	3.33489
cg10169854	-2.81655
cg10182418	5.00524
cg10194160	3.97345
cg10195962	-0.0620511
cg10200987	2.87648
cg10213791	-0.18708
cg10222823	0.66567
cg10260267	4.01395
cg10275272	2.87905
cg10283825	2.00402
cg10286969	-3.85128
cg10297023	5.04546
cg10298059	0.469753
cg10299086	2.42027
cg10305789	3.39982
cg10310310	0.0291421
cg10334489	-1.79566
cg10370599	0.725756
cg10422824	0.331764
cg10442913	3.61527
cg10451724	1.55078
cg10477193	0.857851
cg10477345	1.16581
cg10504927	2.84758
cg10515731	3.08584
cg10517014	3.561
cg10555609	-0.152009
cg10576828	-1.74573
cg10581241	0.000462304
cg10583473	2.2695
cg10592454	-1.95025
cg10625931	3.01727
cg10650018	4.82667
cg10665379	1.98625
cg10715930	0.34264
cg10766475	3.19158
cg10768548	-0.593518
cg10780949	2.33169
cg10796805	2.74606
cg10812429	-0.913235
cg10857905	4.56311
cg10860308	3.5425
cg10868715	2.15361
cg10872774	-0.350784
cg10887366	-0.845202
cg10893656	0.352056
cg10909678	3.83419
cg10943932	2.62397
cg10951873	2.04675
cg10972184	2.29676
cg11002033	3.49181
cg11017382	4.33213
cg11069071	-4.24849
cg11072113	1.82401
cg11118697	-3.47763
cg11172693	3.04161
cg11203377	1.91574
cg11210138	0.214529
cg11214889	2.44415
cg11248254	2.83963
cg11251858	0.393268
cg11280896	2.77695
cg11298627	-0.0768489
cg11333886	3.81159
cg11342277	4.24876
cg11343820	-2.87645
cg11354101	-2.32491
cg11374582	-1.02634
cg11395901	0.457553
cg11409060	0.374826
cg11428540	1.47804
cg11448127	2.70774
cg11513049	3.53976
cg11517132	-0.140374
cg11520366	-0.1403
cg11551257	0.192756
cg11625222	3.50149
cg11639876	-0.0859189
cg11660146	3.35706
cg11670605	1.776
cg11673244	0.932096
cg11695653	5.3877
cg11715228	0.0775231
cg11737030	1.2255
cg11744966	3.28505
cg11745019	-1.12101
cg11753366	-4.69351
cg11777419	2.52623
cg11786776	2.0769
cg11787288	5.50592
cg11787789	-0.119737
cg11813455	3.80215
cg11841522	1.03133
cg11869269	-0.70833
cg11949328	-0.264379
cg11956819	3.27768
cg11966524	5.28358
cg12020676	-4.75985
cg12029804	3.33715
cg12046414	2.33265
cg12055259	-0.117146
cg12069185	2.23386
cg12083125	1.96777
cg12152443	1.5304
cg12211605	1.10384
cg12219045	6.18483
cg12221474	4.7467
cg12221931	2.76782
cg12232388	4.70427
cg12255995	2.97895
cg12265829	1.81769
cg12303341	3.47205
cg12311132	2.44787
cg12348202	7.46121
cg12352059	-2.1031
cg12384236	2.26213
cg12400336	1.59723
cg12429939	-7.23714
cg12430467	5.57438
cg12436851	1.81686
cg12443753	5.05132
cg12448933	7.1676
cg12489934	1.38624
cg12509733	-0.257578
cg12510981	2.25823
cg12526346	3.36657
cg12539606	5.8915
cg12552889	1.12101
cg12560154	-2.91448
cg12563184	1.19157
cg12583095	-0.0531057
cg12583128	3.17213
cg12599982	2.96836
cg12627074	1.8614
cg12639324	0.532096
cg12643378	3.51144
cg12685846	1.97043
cg12747469	-1.71746
cg12763919	3.64368
cg12779445	-0.32609
cg12804278	6.10048
cg12825577	2.12201
cg12872357	-2.7202
cg12918457	0.738
cg12930553	2.49924
cg12948116	3.81934
cg12964647	-0.00876614
cg13008005	-4.3359
cg13046801	-1.56885
cg13065834	1.90662
cg13079047	3.90865
cg13085414	2.69619
cg13196879	3.51174
cg13197406	0.564468
cg13212283	3.97897
cg13246856	1.30004
cg13287553	1.92269
cg13290149	0.170902
cg13332729	0.132093
cg13337238	4.29798
cg13345849	5.04187
cg13363417	0.901556
cg13376758	0.266537
cg13388111	0.472023
cg13405423	4.31808
cg13412433	4.93972
cg13436843	-0.774464
cg13453520	2.92191
cg13454258	2.29085
cg13480357	7.24829
cg13483882	1.59505
cg13565215	3.80966
cg13571576	5.60918
cg13589218	3.51106
cg13630095	2.8458
cg13631572	0.295205
cg13652520	0.424954
cg13698274	1.82518
cg13704403	2.53647
cg13708497	0.901301
cg13746660	2.30662
cg13831136	2.87711
cg13839457	0.120012
cg13873758	0.838563
cg13873813	3.9341
cg13882278	1.49642
cg13924580	4.47528
cg13932954	1.6952
cg13982688	2.69975
cg13984060	3.50974
cg14015502	2.11992
cg14027907	2.82891
cg14030055	0.166488
cg14065869	0.884658
cg14099514	3.8008
cg14106921	2.92007
cg14141380	0.634426
cg14166053	0.297475
cg14211930	6.38323
cg14273401	0.820313
cg14287235	1.44781
cg14321424	0.068629
cg14355941	-6.09209
cg14360852	3.64779
cg14369970	5.04498
cg14409866	5.731
cg14412317	1.69474
cg14419560	2.62502
cg14424610	-0.428447
cg14454907	7.02868
cg14519115	2.36527
cg14520214	1.56249
cg14546471	0.63485
cg14606976	4.52123
cg14720773	4.28379
cg14725082	1.32507
cg14747086	2.53557
cg14780183	1.16147
cg14782015	2.1649
cg14839147	1.13947
cg14855529	-2.65729
cg14871997	-3.25246
cg14889768	1.9999
cg14897765	1.21712
cg14932809	-3.34473
cg14939082	3.11787
cg14940165	3.85081
cg14982276	1.69399
cg15014277	3.58603
cg15056128	1.96946
cg15056556	3.79542
cg15093247	3.04017
cg15124757	3.87314
cg15139482	3.08189
cg15164194	-1.07264
cg15171962	-3.14247
cg15227982	1.86125
cg15264255	2.92543
cg15296644	-1.85421
cg15311460	3.89572
cg15360853	3.70524
cg15364725	4.36569
cg15384453	3.69816
cg15390122	3.13278
cg15401952	1.10259
cg15410276	6.80193
cg15415787	2.94273
cg15427906	5.07269
cg15451470	-0.0648652
cg15508280	-2.4707
cg15523998	-4.70615
cg15527674	4.43082
cg15534561	3.94048
cg15536165	0.495727
cg15543523	1.15778
cg15566506	2.7336
cg15595588	6.45037
cg15626350	1.18034
cg15630907	0.627661
cg15643346	0.750071
cg15645138	2.63928
cg15649452	0.016316
cg15651692	0.478281
cg15721577	3.47913
cg15739881	2.05934
cg15759147	0.581068
cg15769764	2.55015
cg15780870	-1.8105
cg15791369	0.691019
cg15799109	0.515847
cg15806809	1.2827
cg15821319	3.83838
cg15833294	3.4607
cg15843331	0.280658
cg15858166	-6.24257
cg15863148	1.59815
cg15874872	1.48943
cg15883382	7.28058
cg15893779	1.56407
cg15904130	-0.0158421
cg15942185	3.01368
cg15945016	3.45298
cg15962314	2.6991
cg15964611	1.60694
cg15971100	3.39892
cg15980539	1.11034
cg15990192	5.04711
cg15997162	1.97069
cg16025819	0.571969
cg16053889	1.46855
cg16060664	4.18
cg16062877	0.0680599
cg16081441	3.21036
cg16108246	2.17191
cg16119522	5.35574
cg16199322	1.63928
cg16201003	-3.93009
cg16215203	0.318881
cg16237891	0.631252
cg16238993	5.79379
cg16244770	3.71351
cg16259229	4.67614
cg16318522	4.81922
cg16347279	4.01487
cg16369366	1.29746
cg16371860	1.22434
cg16377327	-0.138018
cg16397193	0.333036
cg16408735	0.381696
cg16430510	1.19461
cg16434940	1.55973
cg16435600	8.054
cg16448102	0.780176
cg16467687	-5.5045
cg16473757	0.800661
cg16477744	1.69302
cg16489610	1.75429
cg16506114	-0.147299
cg16524830	3.69081
cg16544956	1.53196
cg16558906	1.66907
cg16579049	4.08527
cg16585580	5.93971
cg16619139	0.240479
cg16639665	2.95972
cg16674492	0.318645
cg16761581	1.71765
cg16764494	2.2766
cg16803064	-4.5461
cg16835618	1.09428
cg16944092	1.98128
cg16953473	4.63194
cg16974014	5.2455
cg16974138	3.08662
cg16991589	-2.81279
cg17019616	2.66532
cg17065410	1.98809
cg17083614	3.12888
cg17102112	1.17546
cg17104870	0.00598131
cg17126622	3.06473
cg17176573	3.93869
cg17225651	5.4276
cg17231874	5.13638
cg17245223	-2.6686
cg17260276	2.02697
cg17266233	0.38018
cg17325674	4.75186
cg17414508	0.739313
cg17439009	2.43252
cg17525357	0.369804
cg17526462	-0.695789
cg17527969	1.60974
cg17543458	0.884422
cg17557533	4.35844
cg17565967	-0.990191
cg17585031	-1.58384
cg17592292	0.225089
cg17610929	2.53054
cg17628700	0.965886
cg17642618	1.60587
cg17677487	2.46342
cg17740322	1.26319
cg17790928	3.25533
cg17799295	3.39549
cg17806989	0.208515
cg17826168	-0.165554
cg17826531	2.84224
cg17838773	1.20344
cg17844831	1.48203
cg17856063	1.07793
cg17894755	1.85842
cg17931041	1.25021
cg17936725	-2.73119
cg17942573	7.08847
cg17960164	4.30943
cg17961892	-0.098071
cg17967780	-4.17785
cg17976205	0.150891
cg17986778	5.44956
cg18031596	5.20894
cg18064714	3.1451
cg18074184	3.44818
cg18131810	1.52769
cg18174651	-4.00839
cg18175036	2.30366
cg18179075	4.02752
cg18204584	3.84028
cg18243536	-1.15578
cg18248911	4.28217
cg18262079	0.880398
cg18286201	-1.14091
cg18297538	2.13306
cg18314863	4.94241
cg18337963	3.31366
cg18342425	-4.93301
cg18351999	1.54001
cg18381455	1.32024
cg18395327	4.41894
cg18413305	6.12099
cg18422586	5.14026
cg18432384	2.35411
cg18435674	1.21954
cg18442069	1.1321
cg18446895	2.19373
cg18465391	2.22587
cg18474108	-1.45802
cg18474742	2.58751
cg18485193	6.69591
cg18502917	2.04658
cg18504015	2.35552
cg18565342	8.25288
cg18578096	2.74826
cg18580274	2.07291
cg18585693	2.32667
cg18601426	2.29776
cg18616979	2.18066
cg18633693	4.04968
cg18648169	1.29039
cg18653282	3.4996
cg18684207	2.30738
cg18716821	5.83681
cg18766210	2.73278
cg18768238	-1.97758
cg18810712	2.57688
cg18815025	0.790325
cg18830442	1.71126
cg18832632	4.35205
cg18844301	0.870237
cg18853376	2.3916
cg18863062	4.26406
cg18911592	2.40291
cg18916853	-5.70625
cg18925548	2.5304
cg18943383	4.86913
cg18948646	-0.131753
cg18966819	2.80985
cg19055060	0.812704
cg19064258	3.09047
cg19065831	2.66935
cg19074255	4.63915
cg19086570	-5.50193
cg19091116	-1.8187
cg19096424	0.0075592
cg19107692	2.16265
cg19109729	0.22383
cg19123916	3.33229
cg19140523	1.35011
cg19151121	1.94967
cg19178742	1.97972
cg19210770	3.44247
cg19247841	2.39201
cg19255468	2.41307
cg19276111	3.26903
cg19283196	4.86171
cg19315202	2.95952
cg19349861	0.518648
cg19355069	2.00248
cg19363546	2.59234
cg19375530	1.5364
cg19382642	-0.881267
cg19408572	8.96951
cg19411146	-0.221007
cg19425969	3.46765
cg19481259	-0.854536
cg19546943	-0.628212
cg19563237	2.7283
cg19574514	2.18024
cg19575807	5.24343
cg19591408	-0.225656
cg19597498	-4.47251
cg19604323	2.2709
cg19614698	2.71492
cg19631264	-0.707003
cg19636384	2.62567
cg19638477	1.18892
cg19641455	3.1292
cg19646112	1.40744
cg19677522	1.48295
cg19681956	1.94949
cg19703610	0.258342
cg19710330	4.17849
cg19712586	0.780532
cg19722814	0.670743
cg19743346	1.11358
cg19781053	4.16123
cg19782322	-0.217722
cg19789919	1.38517
cg19796273	5.26759
cg19819145	0.482964
cg19831967	0.933294
cg19833116	-1.6622
cg19838022	3.35472
cg19898963	-1.10048
cg19956166	-0.157984
cg19965221	0.577086
cg19991458	0.919274
cg20023231	4.93272
cg20098887	5.33711
cg20100292	2.34249
cg20150306	0.959705
cg20180640	3.67973
cg20198337	2.5526
cg20207973	2.08622
cg20253551	2.36406
cg20276103	1.4506
cg20293994	-0.938408
cg20295186	-2.29175
cg20313628	1.81068
cg20392637	0.943601
cg20402664	0.46423
cg20420826	4.53581
cg20434666	-2.44576
cg20438404	2.21621
cg20452714	2.85279
cg20474788	-0.728376
cg20477497	-0.0902427
cg20504007	-2.26781
cg20538314	-0.00382704
cg20559245	2.59033
cg20567119	0.741298
cg20583095	1.32706
cg20583316	1.44338
cg20589815	0.770275
cg20603637	6.31789
cg20627916	3.04836
cg20637347	4.59181
cg20646782	1.89154
cg20714708	4.75292
cg20732304	4.1488
cg20797270	3.36016
cg20801718	0.412466
cg20837557	-0.59718
cg20850122	0.804371
cg20873686	1.10589
cg20876466	0.0495201
cg20938781	2.33068
cg20957637	2.45757
cg20964285	5.3026
cg20969685	7.97492
cg20971970	1.56371
cg20997773	-1.01125
cg21001065	1.33721
cg21014159	3.28919
cg21068480	5.87925
cg21104040	0.436328
cg21135466	0.837601
cg21154793	2.8851
cg21160842	3.80492
cg21176597	-0.974767
cg21243889	2.55103
cg21275526	0.966209
cg21284733	2.44204
cg21294471	0.269307
cg21341928	-2.87174
cg21414754	2.03961
cg21435394	1.33767
cg21438382	0.171491
cg21492137	-5.71933
cg21519202	3.30662
cg21527132	1.70991
cg21579147	2.0614
cg21580846	1.94644
cg21608605	-2.68345
cg21614759	2.59791
cg21615831	0.643112
cg21640587	2.27749
cg21642176	1.31039
cg21656726	1.59718
cg21671020	1.92266
cg21675036	1.41631
cg21695311	1.41806
cg21731779	3.97303
cg21767952	0.788288
cg21768204	3.42956
cg21784716	-2.5202
cg21817075	1.73341
cg21831927	-0.333719
cg21836627	1.51941
cg21878148	-2.26928
cg21878918	3.73328
cg21889266	-5.68769
cg21950534	-0.318398
cg21964762	2.87162
cg21967134	4.42167
cg21969073	0.926274
cg22025478	4.06733
cg22030890	1.36867
cg22104487	5.66314
cg22121388	2.18043
cg22122410	1.05613
cg22143280	3.62927
cg22282410	7.66882
cg22325823	1.89099
cg22337426	1.95163
cg22377040	5.05777
cg22415474	6.10286
cg22442895	-1.43245
cg22528123	2.82734
cg22528556	-1.06236
cg22531663	4.38462
cg22572454	1.07145
cg22612251	-3.74078
cg22680591	1.55147
cg22681784	4.48124
cg22693065	3.60167
cg22698904	1.55871
cg22789065	2.4561
cg22797643	1.36967
cg22809407	5.30655
cg22922242	-1.78836
cg22930187	2.26765
cg22939870	2.88336
cg22977099	0.939175
cg22977115	2.55989
cg22987353	2.84761
cg23009221	2.49844
cg23019889	4.89379
cg23089838	4.68637
cg23093589	5.28678
cg23129170	4.18553
cg23161794	2.0227
cg23163475	2.40812
cg23164938	3.64669
cg23179456	4.84916
cg23212838	2.81817
cg23236270	2.97148
cg23240961	-0.0601622
cg23247968	2.35755
cg23267550	2.69683
cg23344452	0.248464
cg23372011	4.39466
cg23380821	-0.00952284
cg23382699	3.05789
cg23467008	4.31637
cg23468699	-1.51455
cg23500537	7.71813
cg23501240	0.00446392
cg23513318	4.55815
cg23531799	0.751626
cg23543123	6.36405
cg23560320	3.9886
cg23610455	1.84199
cg23624321	4.36124
cg23631321	2.90374
cg23634348	2.6943
cg23634395	5.2084
cg23642250	2.88755
cg23651826	1.89277
cg23658744	3.66813
cg23668004	3.71051
cg23713724	5.21869
cg23776012	4.3029
cg23794037	0.207158
cg23832237	1.29419
cg23833452	1.61143
cg23861655	2.5995
cg23877021	-0.480893
cg23885932	6.75939
cg23911709	-2.8513
cg23956260	1.06846
cg23957424	3.93762
cg23967554	3.59313
cg24016844	0.445443
cg24022656	2.6969
cg24030622	3.96902
cg24120597	1.6214
cg24132481	6.86832
cg24157042	5.57007
cg24158324	2.20479
cg24169765	-0.384892
cg24186674	1.36753
cg24205453	1.31141
cg24234256	3.86906
cg24247667	2.45174
cg24250669	2.50523
cg24266670	1.99272
cg24322052	1.80018
cg24333422	0.567789
cg24389606	2.05516
cg24399924	4.76321
cg24422027	1.82458
cg24440302	3.04973
cg24452347	1.02094
cg24469923	-2.48832
cg24476449	-0.295544
cg24487076	1.26549
cg24517252	-0.129047
cg24521848	7.65595
cg24539923	-0.365701
cg24572108	1.80156
cg24595261	3.65144
cg24603803	1.03997
cg24613083	2.95006
cg24619477	-1.26808
cg24670747	-1.51737
cg24707416	0.356096
cg24721873	1.44968
cg24743778	1.47757
cg24744430	2.50273
cg24748867	1.70034
cg24760023	-2.63365
cg24770596	2.08725
cg24834740	-0.0394658
cg24881205	0.0264772
cg24894629	-1.90029
cg24900370	3.07072
cg24900983	1.64708
cg24901042	2.87562
cg24940433	0.560686
cg25042430	3.09653
cg25050951	7.6468
cg25073813	1.51169
cg25104397	2.76036
cg25117523	0.415511
cg25137403	3.71903
cg25173960	0.195435
cg25222014	8.05391
cg25291551	2.56211
cg25332377	4.5794
cg25334928	2.15195
cg25395660	2.63162
cg25433624	0.892985
cg25476599	1.14149
cg25548316	0.878519
cg25556905	-0.346316
cg25565383	2.87513
cg25634742	1.47261
cg25637722	2.67102
cg25659317	3.34636
cg25684640	0.107908
cg25708328	3.60636
cg25734364	2.19491
cg25752797	-1.84948
cg25764931	1.1015
cg25793630	4.34492
cg25826546	1.81716
cg25836499	-1.81537
cg25841256	4.46393
cg25853078	1.10536
cg25876637	2.08546
cg25908045	0.528333
cg25923450	4.04581
cg25932164	0.11147
cg25944230	3.40382
cg25950625	0.999407
cg25995133	4.36819
cg26029554	0.131186
cg26057104	0.031268
cg26065806	1.99358
cg26089160	4.06848
cg26089753	1.58367
cg26091021	4.73611
cg26116969	-0.69034
cg26119367	3.71255
cg26121639	-1.6014
cg26135506	0.65618
cg26142132	2.33683
cg26181939	3.36772
cg26239984	2.85421
cg26246740	-3.56051
cg26252281	6.66878
cg26256630	0.867463
cg26256999	4.32905
cg26258320	-0.0492111
cg26309194	1.65506
cg26332534	1.12952
cg26337277	4.22657
cg26353328	5.1903
cg26357587	1.5934
cg26363167	6.58031
cg26404511	8.64091
cg26418137	2.7119
cg26437842	-2.90582
cg26504026	3.08603
cg26504906	-5.7266
cg26522319	5.70634
cg26637901	3.2973
cg26640901	3.08575
cg26644059	2.93392
cg26644885	5.12942
cg26650064	4.52502
cg26680502	4.98396
cg26681822	4.15623
cg26685352	1.9698
cg26691533	-0.226455
cg26711230	-0.0179026
cg26759551	3.73571
cg26761572	-1.16374
cg26774079	0.67043
cg26791905	6.13336
cg26823290	7.91547
cg26834950	1.60945
cg26879203	2.29521
cg26881527	4.31899
cg26883033	4.43296
cg26903053	-0.133887
cg26911026	2.60942
cg26918645	0.644845
cg26919461	4.05371
cg26956371	2.58027
cg26967842	3.08954
cg27009374	-2.14691
cg27013953	5.76777
cg27041554	1.58791
cg27072749	3.53166
cg27103436	-5.91839
cg27106950	0.188855
cg27123071	2.23125
cg27175288	5.19963
cg27196467	-0.86963
cg27208169	4.11873
cg27252970	5.17435
cg27256295	0.305807
cg27281884	2.5886
cg27305133	1.78181
cg27319151	2.36232
cg27326750	1.572
cg27350716	0.229782
cg27351780	-0.254869
cg27377213	6.71536
cg27392792	9.65144
cg27403265	3.4236
cg27409673	0.34454
cg27417526	-1.25515
cg27449360	2.19503
cg27459529	-1.0405
cg27475174	0.625952
cg27494429	-0.0517499
cg27505627	0.523749
cg27517345	1.20993
cg27523882	-0.184385
cg27563423	2.12875
cg27565609	0.986933
cg27566403	3.36083
cg27613357	2.20561
cg27616227	4.75679
cg27618240	5.11576
cg27618684	1.01647
cg27620946	3.52873
cg27627209	3.54268
cg27650228	1.68188

## Sheet: 054
probe_id	median_change
cg00004963	-3.1655
cg00005423	1.5687
cg00013451	4.4276
cg00037186	3.73572
cg00054210	5.09092
cg00056767	2.34673
cg00061695	1.81908
cg00068503	0.331357
cg00116583	1.2509
cg00118989	-1.9306
cg00144186	3.02436
cg00146695	2.08594
cg00159289	1.12492
cg00161968	5.70049
cg00172812	1.3942
cg00176210	2.41063
cg00206356	2.91808
cg00221654	4.71524
cg00224911	1.93715
cg00244745	0.0901152
cg00268840	5.77505
cg00274279	0.0377335
cg00292001	3.38398
cg00293936	0.993291
cg00301630	4.26659
cg00303541	2.06726
cg00314240	2.69773
cg00328724	2.20704
cg00333255	6.90417
cg00338735	4.66529
cg00343305	1.20743
cg00345123	2.91353
cg00347757	6.20252
cg00359010	3.51012
cg00368636	2.81239
cg00374839	3.52445
cg00378730	7.52656
cg00389176	0.669492
cg00397545	1.56708
cg00408021	2.26932
cg00410898	3.39837
cg00413066	-0.462616
cg00423124	1.10015
cg00475509	1.2072
cg00480264	3.67346
cg00485849	2.95266
cg00523188	4.92712
cg00546491	3.83063
cg00566505	0.942717
cg00586644	4.34241
cg00590761	1.7469
cg00615377	2.32333
cg00622661	4.98206
cg00630958	5.56204
cg00636390	0.0348128
cg00662684	-0.526215
cg00663832	1.75169
cg00664406	2.67221
cg00674304	4.64679
cg00675569	2.35466
cg00677945	0.195292
cg00687233	3.73537
cg00696003	3.33379
cg00700007	5.97716
cg00713400	1.24658
cg00762830	-0.293814
cg00770599	1.08837
cg00783184	0.184093
cg00791764	1.29517
cg00797821	3.35379
cg00809154	0.165022
cg00825967	1.82393
cg00836662	0.935607
cg00851482	4.98531
cg00859314	0.778309
cg00865537	0.717058
cg00890010	3.94271
cg00906943	2.0646
cg00931742	0.734272
cg00974579	3.02448
cg01002622	5.10243
cg01026256	2.29297
cg01027937	2.55272
cg01035198	0.276302
cg01089639	0.368924
cg01106366	0.598325
cg01107031	-1.4239
cg01112082	0.694693
cg01202358	1.54267
cg01227537	4.9876
cg01266287	3.22262
cg01272599	3.05249
cg01304890	4.43469
cg01326482	0.560656
cg01336809	0.535132
cg01347529	3.36914
cg01389203	1.98102
cg01401534	2.87379
cg01432620	0.542813
cg01454528	0.391632
cg01457413	0.0833247
cg01483681	-0.674096
cg01501312	3.68252
cg01501819	2.34685
cg01509141	1.00194
cg01510388	5.49441
cg01510813	1.6163
cg01548743	1.45443
cg01550884	1.54982
cg01558909	0.378955
cg01564033	4.16301
cg01566323	0.346374
cg01570459	0.601567
cg01610632	7.9725
cg01647314	3.39893
cg01687793	1.85739
cg01691686	2.09673
cg01694557	-2.08604
cg01728173	1.75364
cg01744019	2.73112
cg01745499	1.27485
cg01782633	2.10591
cg01783322	-0.228839
cg01798185	4.32762
cg01804345	-2.68436
cg01819586	2.96976
cg01827726	-2.41123
cg01845427	-0.637224
cg01866215	-0.623139
cg01866805	1.82489
cg01869769	5.89991
cg01870681	-0.813286
cg01877352	0.86265
cg01905321	0.986845
cg01926269	3.03207
cg01963633	-2.9683
cg01992107	2.13969
cg02046192	1.99
cg02055483	0.706646
cg02060689	2.59088
cg02066009	5.32282
cg02119837	2.37654
cg02146857	2.57823
cg02184008	4.2202
cg02192300	0.520335
cg02239862	5.24229
cg02251134	-0.984181
cg02255844	6.07458
cg02285920	2.45385
cg02370395	3.16288
cg02386604	2.10593
cg02438517	2.1157
cg02466152	5.97395
cg02475474	2.82902
cg02504416	-0.0368481
cg02519751	5.06109
cg02549595	1.1029
cg02554712	1.26431
cg02583827	3.24207
cg02616966	5.22589
cg02647941	7.97424
cg02654940	6.09398
cg02668729	-0.200123
cg02703731	-0.441124
cg02721665	0.576049
cg02729344	8.0888
cg02747210	0.159793
cg02753029	7.64426
cg02757432	3.21402
cg02773435	1.76463
cg02837428	4.76015
cg02843201	2.97204
cg02845063	3.82507
cg02861781	1.22988
cg02907049	3.45069
cg02907402	1.05163
cg02914422	5.77568
cg02919799	2.18858
cg03009464	4.44323
cg03018058	4.15454
cg03034880	2.72882
cg03084901	-0.42032
cg03085712	4.34054
cg03091512	-1.57652
cg03092271	0.852295
cg03151554	2.17177
cg03186004	1.70612
cg03216144	2.99093
cg03223057	2.32962
cg03228222	3.98996
cg03309232	2.97202
cg03318940	4.33646
cg03344955	2.73371
cg03363863	2.56054
cg03401213	0.14709
cg03401738	2.23801
cg03402152	1.47063
cg03409668	2.06167
cg03440750	-0.541836
cg03442378	5.13142
cg03449543	0.712933
cg03453449	6.73851
cg03470088	1.47336
cg03470396	-1.61822
cg03476000	0.647165
cg03491584	1.00414
cg03497399	4.67724
cg03514351	6.47541
cg03523077	-0.232492
cg03530364	2.33708
cg03562071	5.18962
cg03574723	10.4238
cg03588357	-0.266196
cg03629943	2.23309
cg03675171	3.04232
cg03682366	4.37573
cg03689120	0.944081
cg03697509	5.34078
cg03723629	2.84665
cg03738253	0.130301
cg03767475	1.05029
cg03786743	2.12711
cg03822259	-0.521881
cg03826366	3.9616
cg03890167	2.44692
cg03925132	2.7858
cg03929531	0.922333
cg03944810	3.89807
cg03964111	2.31905
cg03981074	1.22642
cg03987919	4.5903
cg03996822	3.39966
cg04001732	1.36521
cg04005555	0.864264
cg04007531	-1.20602
cg04011182	1.85907
cg04014105	4.74751
cg04015794	1.11864
cg04017458	-3.06059
cg04037218	1.3814
cg04046629	5.06953
cg04087628	2.07617
cg04100190	3.00397
cg04134731	0.390449
cg04139449	3.90142
cg04141813	1.70167
cg04165718	0.478548
cg04176437	1.57911
cg04194494	1.4228
cg04210645	2.92022
cg04214626	-0.0719606
cg04236580	2.90645
cg04252011	4.88929
cg04267152	4.28203
cg04275947	1.72269
cg04277193	-2.09576
cg04325960	-2.09174
cg04343891	0.272632
cg04367252	1.86172
cg04367345	5.68047
cg04418492	6.95115
cg04420275	0.612061
cg04440184	0.164964
cg04453050	4.1506
cg04488758	2.5088
cg04493558	1.01748
cg04497116	3.78806
cg04498295	-5.04236
cg04519487	3.26776
cg04537050	0.368371
cg04545136	5.10885
cg04547554	-0.395961
cg04549162	6.8952
cg04557677	-1.69888
cg04557949	0.421802
cg04578774	6.45197
cg04593780	3.08957
cg04645534	0.40145
cg04666446	0.843131
cg04676561	5.31795
cg04738965	11.7211
cg04780260	0.364029
cg04786254	-1.03078
cg04866162	3.35599
cg04892836	6.25565
cg04916091	3.71892
cg04953972	0.365881
cg04959537	2.43895
cg04988423	-0.071177
cg04991337	5.4738
cg05051606	5.47167
cg05071212	12.4792
cg05073035	8.53201
cg05086084	3.48589
cg05092353	2.97785
cg05098876	0.830224
cg05104081	0.388402
cg05133578	2.05026
cg05197142	1.89521
cg05230567	-1.44405
cg05231834	0.0966026
cg05259767	4.60587
cg05315206	3.08378
cg05371578	8.12029
cg05446010	0.0474253
cg05496383	5.43883
cg05501285	5.35151
cg05512100	3.69235
cg05526886	-1.46432
cg05528782	5.59116
cg05544396	3.21881
cg05560728	0.847064
cg05635754	1.76534
cg05637188	-1.63074
cg05638174	7.09053
cg05639912	5.15062
cg05644480	3.38443
cg05680085	6.10392
cg05700079	7.06951
cg05704893	0.476107
cg05726600	2.90372
cg05818685	3.74834
cg05823493	1.03132
cg05829479	0.047134
cg05850327	5.81013
cg05876635	-0.68064
cg05962092	4.49004
cg05975881	2.25724
cg06000564	0.332714
cg06048358	-2.57043
cg06063903	3.91061
cg06074123	2.63617
cg06080793	4.64473
cg06175825	3.35074
cg06181761	0.347373
cg06186394	1.33475
cg06196453	1.6493
cg06245037	7.68077
cg06300254	4.5697
cg06312469	1.3223
cg06319822	4.86117
cg06360465	2.22936
cg06418907	2.26395
cg06427838	2.27623
cg06448705	1.95111
cg06462220	1.90778
cg06476970	0.655947
cg06505089	0.438136
cg06521472	1.58747
cg06554120	6.28567
cg06564523	1.00541
cg06579248	-0.327473
cg06580725	3.34885
cg06606199	0.909914
cg06616710	3.55839
cg06640584	6.49467
cg06679087	3.27085
cg06682525	0.871141
cg06700146	3.82528
cg06713632	3.91649
cg06725997	-2.10798
cg06728437	0.804689
cg06739462	0.543483
cg06748006	1.62513
cg06771256	1.85109
cg06778429	1.98398
cg06786050	1.09279
cg06832404	-1.34443
cg06858294	3.34708
cg06861519	0.142171
cg06877848	2.29819
cg06886736	5.07612
cg06900008	0.314638
cg06904565	0.258987
cg06908244	1.29834
cg06915826	1.2631
cg06936647	4.08243
cg07005356	3.08787
cg07008600	0.431806
cg07014072	2.64796
cg07033202	4.16772
cg07036530	-1.56778
cg07076751	0.865633
cg07084796	0.507893
cg07098528	0.574313
cg07109002	-1.07987
cg07136054	3.76728
cg07138603	2.8846
cg07139087	-0.164491
cg07178006	2.98292
cg07190988	7.10343
cg07197585	2.44751
cg07208344	1.09866
cg07219103	0.771252
cg07277633	6.99947
cg07280387	0.188592
cg07291439	0.528118
cg07330145	0.526823
cg07378309	2.58582
cg07379741	1.29399
cg07394955	3.28849
cg07425348	1.60835
cg07464924	5.47394
cg07466193	3.05936
cg07509155	1.64386
cg07515565	6.13081
cg07545306	3.79317
cg07545317	2.28076
cg07570610	1.73658
cg07572966	-2.51142
cg07620889	5.82482
cg07633506	2.21011
cg07634101	4.43693
cg07637123	3.21946
cg07679948	3.20849
cg07704934	5.11834
cg07762181	2.27038
cg07773593	3.58435
cg07774884	2.56595
cg07793849	5.64558
cg07807575	5.33608
cg07829465	0.51186
cg07851008	4.81202
cg07856714	1.48878
cg07857469	4.2051
cg07866867	-0.528116
cg07921371	6.27889
cg07934030	1.26686
cg07943683	5.89321
cg07948034	0.554295
cg07955887	0.427532
cg08001383	0.0321806
cg08022436	5.32008
cg08030082	3.64148
cg08070771	0.212777
cg08114812	3.82087
cg08130179	0.190953
cg08149193	3.16509
cg08177015	1.57792
cg08194989	5.56758
cg08222513	-0.808308
cg08234308	6.73379
cg08247916	-3.75834
cg08255137	0.150612
cg08327532	1.78796
cg08335767	2.95085
cg08342332	0.194316
cg08354187	0.743825
cg08359956	1.4812
cg08361684	2.80151
cg08391898	1.47265
cg08393070	6.37566
cg08395365	4.83654
cg08408994	5.30038
cg08411860	0.150825
cg08420066	-0.685595
cg08464498	2.71142
cg08469632	-4.47618
cg08513472	6.20969
cg08548500	1.55918
cg08647446	-0.29391
cg08657182	-1.37169
cg08676455	0.343362
cg08700651	4.0223
cg08733774	1.97651
cg08757037	2.76993
cg08757148	1.49676
cg08775835	2.96501
cg08828126	-1.07762
cg08832596	-0.0296071
cg08855449	1.35024
cg08862890	5.93868
cg08868914	2.64219
cg08870143	2.23903
cg08923054	0.192998
cg08948170	2.28148
cg08974450	8.95847
cg08992324	-3.112
cg09006749	1.86613
cg09019916	3.67923
cg09055236	-0.481387
cg09069900	3.36414
cg09138115	-0.423631
cg09159198	-4.63134
cg09160776	2.07213
cg09195389	6.25688
cg09198448	0.539387
cg09216650	1.54727
cg09219142	3.43942
cg09241332	2.67611
cg09253316	3.39967
cg09280663	4.71495
cg09327770	1.09511
cg09336406	0.838865
cg09366703	0.501411
cg09374772	-1.25923
cg09398550	4.06122
cg09408768	3.00208
cg09429111	0.386957
cg09463233	0.128186
cg09484076	-0.369915
cg09523819	-1.20335
cg09530530	2.05224
cg09568217	1.03446
cg09593462	1.8049
cg09616647	0.491232
cg09618015	1.33019
cg09639631	-2.2831
cg09640682	0.00625095
cg09648702	2.07269
cg09649245	0.668783
cg09711113	-0.449919
cg09790502	-0.250196
cg09800012	0.797622
cg09801607	1.70819
cg09806262	0.808295
cg09812623	6.14434
cg09835239	-0.185775
cg09916783	5.50368
cg09949775	2.19668
cg09956615	-1.49349
cg09975850	2.57336
cg09995475	4.27955
cg10019819	0.708208
cg10069493	0.595368
cg10085668	2.12752
cg10087138	4.84989
cg10092265	4.78781
cg10107050	3.45461
cg10122267	3.59748
cg10122778	0.259048
cg10131312	3.18755
cg10137837	5.93954
cg10145196	1.82532
cg10146267	0.54767
cg10158843	1.08806
cg10200629	0.203736
cg10207428	-0.290641
cg10310682	1.26435
cg10357657	3.50622
cg10360323	-2.19017
cg10369169	1.63325
cg10380362	1.86149
cg10398407	0.35268
cg10409299	1.49915
cg10411510	0.690637
cg10424681	2.91885
cg10426318	1.14175
cg10442240	2.18928
cg10443195	1.43905
cg10458142	3.17774
cg10497871	1.58793
cg10523019	4.28203
cg10539274	-0.413104
cg10552964	2.04678
cg10598034	3.30875
cg10610528	3.04237
cg10693616	3.25239
cg10695325	0.32201
cg10749822	5.38379
cg10754215	3.27687
cg10761295	2.2223
cg10782923	1.88395
cg10816489	2.69184
cg10896924	4.16333
cg10939579	2.93489
cg10967191	4.3467
cg10981907	3.33708
cg10984515	-0.751884
cg11007023	2.01904
cg11030481	2.25168
cg11061136	4.06651
cg11069430	2.2641
cg11070863	2.07781
cg11086760	-1.02237
cg11112892	1.09426
cg11120927	3.78968
cg11124794	0.879345
cg11142389	0.419279
cg11166252	10.5038
cg11206041	3.33875
cg11249998	-0.121194
cg11328420	-1.23815
cg11337018	0.767113
cg11337525	-0.196977
cg11353035	2.50358
cg11391201	3.09166
cg11401866	0.353463
cg11402503	-0.254663
cg11422709	0.615741
cg11455862	4.76714
cg11487977	4.09166
cg11518945	6.38324
cg11531339	0.36555
cg11576513	0.147041
cg11585358	1.92599
cg11586658	0.294387
cg11590405	2.32988
cg11609001	2.05411
cg11637076	-0.0652032
cg11637682	-2.3629
cg11706467	0.39594
cg11714801	0.0547336
cg11716789	2.03332
cg11735846	3.67742
cg11744524	1.52204
cg11791039	4.81085
cg11843606	-0.141664
cg11856810	3.06198
cg11893763	7.25852
cg11927799	1.34001
cg11933094	3.27154
cg11945452	3.98275
cg11945644	0.810291
cg12003318	2.64365
cg12022583	3.01743
cg12065138	7.28783
cg12087432	3.87964
cg12133305	-0.240566
cg12139012	-0.0685217
cg12150111	2.02864
cg12156272	-0.250583
cg12165772	-0.586414
cg12176709	4.54776
cg12243843	1.59135
cg12245770	5.66274
cg12251336	-0.420687
cg12276123	2.50745
cg12311930	6.00074
cg12394377	1.75157
cg12419052	4.17743
cg12439903	1.30534
cg12451271	5.78492
cg12456825	2.04752
cg12473009	2.42097
cg12549268	0.937317
cg12558519	4.57948
cg12572049	0.757499
cg12585429	0.721853
cg12593515	1.71577
cg12595013	11.6542
cg12598767	3.57137
cg12731089	3.16131
cg12733396	4.14582
cg12741435	1.87702
cg12755298	2.66017
cg12758687	6.88278
cg12779520	3.79758
cg12790373	2.09342
cg12797594	0.851611
cg12800762	1.81943
cg12821315	1.82517
cg12827060	0.916483
cg12927869	2.01108
cg12930727	1.40578
cg12933507	5.3597
cg12961714	-0.0852352
cg12965599	0.287569
cg13001878	2.51095
cg13004440	-0.216952
cg13012868	2.06721
cg13025668	3.18386
cg13040886	2.70991
cg13054640	3.72971
cg13066983	3.53205
cg13166888	2.57263
cg13215078	2.75299
cg13228876	1.2575
cg13309406	2.28801
cg13364701	0.0524673
cg13368941	6.63271
cg13408594	-0.0534806
cg13439730	0.764634
cg13446859	-0.501904
cg13459303	0.723981
cg13464744	-0.301271
cg13487505	6.39951
cg13491250	4.40368
cg13501279	1.62407
cg13518012	7.00252
cg13528344	7.76635
cg13532350	2.5064
cg13536222	2.99561
cg13592485	2.53902
cg13601427	3.27554
cg13645565	2.5457
cg13658458	1.3216
cg13665414	1.03587
cg13676215	3.55143
cg13692476	3.34273
cg13712686	2.65674
cg13747145	1.20679
cg13790268	0.413401
cg13807496	7.75865
cg13808663	5.53759
cg13847963	2.81441
cg13876481	-3.79034
cg13880303	2.41929
cg13900420	-3.33757
cg13928411	4.58113
cg13929598	2.73836
cg13932794	2.91559
cg13941374	2.9923
cg13984181	2.61371
cg14006900	3.10598
cg14030674	1.22104
cg14097294	2.04309
cg14136186	4.35808
cg14199090	0.390442
cg14210620	1.75484
cg14248091	2.10908
cg14252492	4.77587
cg14277108	0.928507
cg14298503	1.57731
cg14334286	3.60062
cg14359659	1.21857
cg14361531	3.4989
cg14368851	2.44791
cg14375543	-2.85633
cg14410064	1.22639
cg14411375	3.07897
cg14431001	-0.280552
cg14431573	2.6494
cg14456683	6.74567
cg14465747	4.64508
cg14501253	2.77664
cg14565151	2.6397
cg14574037	-0.0398721
cg14577029	1.04378
cg14599908	3.498
cg14604568	-0.817428
cg14605835	1.29293
cg14699728	3.46407
cg14722140	3.92712
cg14728310	1.66349
cg14741939	7.76501
cg14766620	3.66965
cg14779299	1.69781
cg14787188	0.961233
cg14814876	0.650862
cg14832908	-0.18251
cg14844588	2.54296
cg14851485	4.71563
cg14851963	0.136399
cg14852486	0.219843
cg14857371	3.4368
cg14868747	0.0214371
cg14904725	1.94775
cg14934413	0.668537
cg14943722	1.37302
cg15002294	3.45806
cg15043057	2.32775
cg15058605	2.02684
cg15085248	3.87313
cg15099250	2.91788
cg15117372	2.69227
cg15153604	0.458218
cg15156367	1.48674
cg15160198	5.50394
cg15165676	1.89463
cg15173741	1.46241
cg15175104	6.78917
cg15188010	3.91258
cg15190747	1.61731
cg15193249	2.32633
cg15264811	2.00846
cg15306126	7.03763
cg15321298	0.36761
cg15324539	1.9479
cg15332750	1.99471
cg15352367	2.62417
cg15424739	1.95675
cg15454818	3.39642
cg15468061	0.115405
cg15480012	3.04831
cg15481438	-0.508797
cg15557662	0.546635
cg15580684	1.02969
cg15591645	1.8188
cg15593716	3.42915
cg15605704	0.388722
cg15611176	-3.86717
cg15612186	1.54083
cg15637528	0.00158792
cg15660077	3.76816
cg15674432	0.827722
cg15737090	1.39703
cg15738450	-5.52263
cg15772506	0.519123
cg15779586	0.544252
cg15784332	1.60083
cg15786900	5.93372
cg15810815	2.15468
cg15817236	1.12026
cg15844871	3.3361
cg15872043	0.688863
cg15879949	1.33678
cg15884223	3.39303
cg15934804	-2.50077
cg15936439	-0.108313
cg15951466	-6.74849
cg15958277	-0.437863
cg15961889	-0.590058
cg15965643	2.21769
cg15986030	1.2471
cg15988350	1.43927
cg16010089	-3.53947
cg16051157	2.90922
cg16065899	2.69366
cg16117799	4.83015
cg16125371	6.39267
cg16128167	3.41012
cg16181396	2.58415
cg16264642	3.04642
cg16302441	5.52825
cg16312655	5.54059
cg16321280	2.92731
cg16323298	5.63885
cg16336268	-2.36321
cg16408267	-0.710948
cg16424178	1.52598
cg16499829	1.83415
cg16506208	3.92565
cg16516556	0.157068
cg16525158	1.80561
cg16526416	4.0393
cg16540129	0.714495
cg16555466	-0.149146
cg16581347	5.80036
cg16608018	4.71746
cg16625004	2.54274
cg16636671	3.2017
cg16674467	0.113926
cg16681085	0.604985
cg16693369	0.669511
cg16698748	0.666034
cg16702666	-0.258419
cg16732780	2.08913
cg16739845	8.1605
cg16748739	1.49035
cg16783279	-0.25554
cg16831085	1.86528
cg16859629	-3.2399
cg16867657	10.1518
cg16903225	3.09818
cg16987305	10.2968
cg17001034	0.914466
cg17009978	2.21429
cg17045772	4.23805
cg17090968	5.70974
cg17117827	1.64897
cg17160886	2.04609
cg17169397	2.99321
cg17178372	-0.579126
cg17179492	2.45418
cg17202781	3.96739
cg17210263	3.08737
cg17220161	2.58752
cg17242556	2.52689
cg17242608	2.20824
cg17251781	0.569956
cg17262328	-3.73267
cg17263363	-0.626829
cg17270104	2.07203
cg17275074	2.06731
cg17280346	3.99658
cg17282111	2.70956
cg17300051	2.91603
cg17347634	0.473978
cg17389835	0.58352
cg17408923	2.62793
cg17422704	2.11919
cg17423207	0.21438
cg17471467	1.89017
cg17546247	0.444329
cg17582637	-4.74152
cg17584345	3.81565
cg17656088	1.69948
cg17679781	1.42013
cg17693940	2.38521
cg17717259	4.10777
cg17802810	0.501857
cg17826013	1.3725
cg17873612	2.76769
cg17882660	2.52822
cg17949969	3.52644
cg17974166	4.00313
cg17987651	5.64293
cg18007268	1.55542
cg18065597	0.979289
cg18099915	0.655846
cg18112863	3.14002
cg18113084	1.6459
cg18145683	0.459553
cg18186394	4.38704
cg18225844	1.5387
cg18236665	-1.43047
cg18252067	4.07988
cg18252260	3.39678
cg18321548	7.44224
cg18327128	-3.05097
cg18356276	0.0270352
cg18379537	0.649009
cg18383890	1.61219
cg18424634	5.54191
cg18431640	4.22161
cg18481230	3.60596
cg18486698	3.01342
cg18527352	2.66211
cg18589481	2.35593
cg18594963	2.57568
cg18613324	1.80628
cg18623336	-0.249188
cg18630644	2.67559
cg18640183	0.772462
cg18651470	6.58502
cg18691875	2.47719
cg18740152	2.34761
cg18749015	2.67742
cg18786720	0.577467
cg18796531	3.88843
cg18798248	4.24091
cg18810342	3.37642
cg18912728	2.56583
cg18985891	0.356192
cg18992706	0.516952
cg19020830	4.91669
cg19023359	4.17069
cg19037327	0.818364
cg19040163	2.21339
cg19058453	5.85788
cg19092368	5.88324
cg19114050	2.63533
cg19169976	1.19779
cg19180546	1.83427
cg19186111	0.442407
cg19195327	0.518651
cg19271626	0.404731
cg19272984	1.84499
cg19289921	1.01978
cg19307003	2.31168
cg19357375	1.24239
cg19374743	2.10084
cg19424531	1.6443
cg19428417	4.87554
cg19450479	4.35028
cg19451698	5.28098
cg19468029	0.172501
cg19468734	1.28885
cg19485202	2.76803
cg19513004	4.59945
cg19522644	1.36295
cg19567795	3.10509
cg19575351	5.40495
cg19595012	1.41635
cg19669044	2.32488
cg19676181	3.8049
cg19726385	1.92163
cg19730798	0.265177
cg19763428	2.89669
cg19764096	3.17875
cg19863752	-0.323483
cg19899312	3.29931
cg19907305	1.88853
cg19910201	0.787259
cg20007462	0.235428
cg20057676	1.77452
cg20132791	0.113189
cg20142271	-0.160068
cg20198768	2.06245
cg20255176	1.30404
cg20255874	1.7136
cg20272884	0.463981
cg20302165	0.705616
cg20310894	2.93057
cg20313400	-2.65872
cg20336388	1.61519
cg20350518	0.722295
cg20359930	3.17804
cg20368506	0.689366
cg20384898	6.12029
cg20387815	4.38445
cg20405893	0.714311
cg20410381	-1.4591
cg20445245	4.72323
cg20445467	1.3582
cg20453845	0.875289
cg20507028	-1.41781
cg20516074	3.52709
cg20583679	4.2379
cg20591745	0.360046
cg20612830	0.658387
cg20629239	2.73465
cg20682326	0.293797
cg20688297	3.07321
cg20704602	4.46772
cg20718319	1.3575
cg20727728	2.0678
cg20769820	5.64816
cg20785360	3.61798
cg20811804	-0.225893
cg20826671	0.686404
cg20846213	6.98593
cg20876538	1.65501
cg20897776	1.54922
cg20929407	2.07332
cg20940469	0.341365
cg20974077	1.92966
cg21029090	1.00096
cg21053135	1.32376
cg21066515	3.48965
cg21186449	3.24176
cg21213853	1.14816
cg21217886	2.58628
cg21233722	3.75753
cg21330703	1.4216
cg21347053	5.9577
cg21356040	0.777599
cg21395018	3.08883
cg21521518	4.01304
cg21530649	1.44085
cg21545762	1.86765
cg21554109	4.67811
cg21556867	5.02245
cg21572722	6.85845
cg21579312	2.07825
cg21585766	2.71266
cg21603716	0.633621
cg21635854	2.06736
cg21664030	3.23244
cg21672040	3.18143
cg21683009	0.660912
cg21700166	0.675659
cg21704109	6.05846
cg21714557	0.315969
cg21716266	1.87286
cg21719344	3.30099
cg21746828	1.75584
cg21760907	0.887787
cg21771173	3.7303
cg21789044	0.928646
cg21808126	0.0388396
cg21809927	-4.1492
cg21899500	2.41009
cg21902754	4.05894
cg21933812	0.631496
cg21978924	5.44952
cg21981270	1.7508
cg21988119	1.3447
cg22039268	0.895582
cg22130008	3.06093
cg22130262	5.31576
cg22134325	4.54142
cg22137177	3.39385
cg22143569	0.341781
cg22152728	-0.46364
cg22172379	1.83165
cg22208435	1.3535
cg22211233	4.9019
cg22224597	3.46345
cg22240814	-1.68289
cg22287624	0.954581
cg22295292	0.554861
cg22297655	-4.30221
cg22332910	2.04443
cg22334665	5.2346
cg22335246	-0.17747
cg22344162	-0.521311
cg22411207	2.06147
cg22598563	4.25973
cg22655975	0.114781
cg22694470	2.47441
cg22718431	4.91845
cg22739025	4.47735
cg22770135	5.06783
cg22801868	5.28321
cg22818556	1.77398
cg22820285	1.66726
cg22854078	3.54165
cg22854836	2.63213
cg22865824	1.09505
cg22873414	1.86423
cg22900229	5.15959
cg22902535	1.1892
cg22919868	-0.112367
cg22922249	4.11846
cg22931182	0.647322
cg22974228	3.74811
cg22975671	2.77789
cg23019585	2.83405
cg23031196	2.94224
cg23040649	5.69425
cg23076351	4.07571
cg23089549	0.430513
cg23100370	-0.0312023
cg23122263	4.34892
cg23146998	2.3888
cg23166970	4.77198
cg23171871	-1.1549
cg23184477	-0.0725249
cg23185401	1.66999
cg23189410	-0.387211
cg23210852	5.91819
cg23238986	3.65743
cg23244192	4.48477
cg23266797	0.865511
cg23270113	1.28844
cg23275502	-2.30152
cg23288973	2.89704
cg23324537	0.395239
cg23338503	3.4462
cg23358625	6.2959
cg23363602	-2.71564
cg23385200	0.728896
cg23396432	2.58946
cg23409403	2.15764
cg23449696	0.470306
cg23460835	4.50506
cg23468878	3.94644
cg23483707	1.0581
cg23484234	3.50046
cg23486142	1.88411
cg23491599	1.76256
cg23598132	0.655048
cg23602829	2.62304
cg23603891	3.6917
cg23632985	5.15489
cg23650279	4.06228
cg23672659	1.16804
cg23682160	3.60924
cg23694492	-0.962832
cg23697780	-1.04471
cg23726035	2.09402
cg23733123	1.76001
cg23751407	9.93423
cg23751922	3.31135
cg23758822	-1.64785
cg23807646	3.72364
cg23847109	5.12155
cg23881278	6.64281
cg23934075	-2.38615
cg23950875	1.84226
cg24008884	4.84618
cg24044616	2.77064
cg24046505	-4.01618
cg24092655	3.85399
cg24111955	2.45977
cg24311251	0.0795909
cg24320902	3.79094
cg24335138	3.45449
cg24362098	5.38696
cg24363374	2.7862
cg24392548	3.07059
cg24407589	1.86662
cg24425171	5.40695
cg24435401	-0.0798866
cg24435747	2.58865
cg24435986	3.5953
cg24444631	-0.0999808
cg24480120	4.25174
cg24495585	4.41216
cg24502014	2.40351
cg24605511	1.40808
cg24623271	0.937342
cg24637773	1.51626
cg24641214	1.46967
cg24669728	1.38432
cg24686358	-0.0770717
cg24686610	-0.347645
cg24690071	1.72257
cg24693368	1.78465
cg24714905	3.86641
cg24718866	1.82363
cg24720583	3.35107
cg24724428	9.41673
cg24749155	5.72787
cg24767336	-1.40044
cg24770624	2.85678
cg24795297	0.522047
cg24880997	-0.14887
cg24887267	1.36412
cg24903094	2.01632
cg24923379	2.90552
cg24990212	-0.599113
cg24999870	3.03568
cg25022915	4.53986
cg25039594	4.28275
cg25054390	5.48185
cg25082637	4.56246
cg25106322	2.541
cg25123266	2.69751
cg25151806	0.212888
cg25207127	3.08443
cg25290445	6.7353
cg25329933	0.695212
cg25342699	0.955894
cg25351996	6.10536
cg25355803	2.28076
cg25372357	0.240542
cg25416125	2.04691
cg25441771	5.45996
cg25469492	0.502035
cg25488206	1.55568
cg25497529	5.4064
cg25502618	0.561059
cg25533096	3.72694
cg25534294	1.20253
cg25551651	4.33859
cg25577322	1.07315
cg25590081	2.90505
cg25601086	1.86308
cg25609507	6.66522
cg25622928	-0.0112675
cg25688973	2.21872
cg25693132	1.7499
cg25693769	3.77514
cg25719538	1.45699
cg25721291	4.41961
cg25834419	3.65738
cg25874034	1.83167
cg25886996	3.48863
cg25907322	-0.108976
cg25932748	-0.246872
cg25947878	0.456536
cg25969900	0.272921
cg25986527	3.05478
cg26011014	3.29522
cg26014383	3.56462
cg26014538	3.78785
cg26024880	2.04045
cg26079664	2.03169
cg26081162	3.93668
cg26132809	2.13494
cg26142412	0.413364
cg26162932	1.65911
cg26172342	0.415208
cg26183265	-0.0209256
cg26183330	1.66143
cg26196531	2.37788
cg26197117	2.81215
cg26200598	1.99081
cg26260408	0.779454
cg26272893	0.406587
cg26314566	3.04252
cg26321986	5.64673
cg26326633	3.33064
cg26337123	0.211274
cg26365854	4.38226
cg26371771	4.24851
cg26375057	11.0944
cg26400885	3.68332
cg26433208	0.0729922
cg26450866	1.65002
cg26473651	3.50947
cg26503653	1.79338
cg26507422	3.13205
cg26540367	1.2634
cg26622872	5.88598
cg26633084	1.39529
cg26645494	1.27506
cg26687811	1.33071
cg26709950	5.2641
cg26710722	1.3617
cg26717041	3.4763
cg26746511	0.390812
cg26747290	5.38732
cg26786723	3.45269
cg26835312	3.94868
cg26842135	-0.904845
cg26872792	-2.68279
cg26883974	6.2791
cg26887632	2.35042
cg26923490	2.44745
cg26954271	-1.49371
cg26976732	0.591954
cg27002178	0.775441
cg27035251	2.38124
cg27042278	2.70648
cg27095915	7.05713
cg27098804	1.14422
cg27148952	3.94383
cg27165884	3.06492
cg27190034	2.81263
cg27222172	7.51778
cg27250526	3.39331
cg27311397	0.18945
cg27313566	-2.29627
cg27318318	3.32021
cg27326226	2.85958
cg27366862	1.44553
cg27436259	2.06515
cg27444281	1.20363
cg27459353	3.56146
cg27478313	3.96562
cg27483478	1.91371
cg27498545	2.81095
cg27549608	3.37753
cg27563121	0.065493
cg27608999	0.829276
cg27619163	3.43102
cg27639457	2.99889
cg27659049	6.66129

## Sheet: 061
probe_id	median_change
cg00002934	6.096
cg00011740	1.95517
cg00022054	-0.42652
cg00044245	5.40795
cg00044796	3.69219
cg00065957	1.52001
cg00105415	1.4071
cg00134776	5.23533
cg00139037	3.51591
cg00189457	1.78641
cg00245538	2.03859
cg00300750	4.15575
cg00349776	-0.236377
cg00350003	8.25607
cg00355389	3.421
cg00372375	1.41369
cg00425817	-1.07635
cg00508975	2.58728
cg00510870	1.5781
cg00519104	1.26092
cg00543839	1.83633
cg00578885	0.108137
cg00584422	3.96169
cg00636809	-0.703912
cg00683895	2.09912
cg00684776	2.9796
cg00700969	2.27937
cg00706282	0.56752
cg00709171	-2.52867
cg00748821	0.177139
cg00751446	2.32759
cg00751586	5.03769
cg00807959	4.21997
cg00817396	2.0162
cg00836482	1.2059
cg00840370	1.20017
cg00852573	7.7754
cg00900946	4.44617
cg00929606	2.05316
cg00961866	1.60957
cg01022370	1.40126
cg01051195	0.321861
cg01053260	2.83712
cg01083050	3.658
cg01085454	3.12269
cg01090089	2.72937
cg01099031	2.12745
cg01144286	1.06341
cg01205124	-2.43622
cg01210520	0.309516
cg01230243	6.52939
cg01239928	1.16586
cg01260146	2.53938
cg01273351	3.61946
cg01340061	-2.10001
cg01385367	3.42205
cg01388144	2.12179
cg01418351	0.062618
cg01456151	1.80882
cg01471196	0.745481
cg01493740	1.68096
cg01495321	1.16171
cg01505870	2.55391
cg01572741	1.04399
cg01590091	-1.30204
cg01615475	-3.26852
cg01633902	-3.83953
cg01755562	6.99446
cg01784220	2.11353
cg01788672	0.608723
cg01836044	5.55029
cg01840850	0.9911
cg01840965	-0.626676
cg01859739	7.22407
cg01884522	-1.04119
cg01913568	3.93155
cg02062140	-0.64724
cg02064104	1.42709
cg02070114	-0.0556617
cg02072400	7.51543
cg02168857	4.15289
cg02181247	4.94877
cg02185164	-0.741262
cg02192934	2.25028
cg02241759	2.92096
cg02246190	2.5685
cg02257675	2.08911
cg02259284	3.71928
cg02266714	1.29319
cg02268965	-2.39379
cg02276826	2.27809
cg02315940	5.91601
cg02364551	1.79368
cg02364584	1.41516
cg02421734	-2.42663
cg02428350	-3.04235
cg02430385	1.56245
cg02524975	2.10908
cg02577240	-0.928489
cg02582608	3.08504
cg02614757	0.0808915
cg02627531	3.57938
cg02662658	3.57576
cg02676653	2.01735
cg02677592	-2.41364
cg02707152	-1.59336
cg02773770	0.0741555
cg02780017	-0.0106477
cg02803139	1.73572
cg02809746	5.62781
cg02843237	0.893928
cg02866870	6.51813
cg02870829	-0.676939
cg02901321	0.188231
cg02901861	1.45305
cg02952828	3.7316
cg02957270	0.473607
cg02959669	3.24819
cg03005603	5.25206
cg03080692	2.38387
cg03108229	2.0548
cg03118206	7.01876
cg03181829	0.691294
cg03207439	1.00358
cg03219657	-2.63701
cg03228826	-0.994855
cg03236869	-2.25185
cg03315869	6.59243
cg03323292	2.02511
cg03376719	2.34886
cg03393966	0.704909
cg03416645	1.671
cg03419014	4.42605
cg03421743	1.53088
cg03459008	0.0635347
cg03496709	6.69145
cg03515878	-0.0858858
cg03529436	4.44587
cg03547086	2.2152
cg03548673	1.99699
cg03566822	11.0686
cg03580305	0.437037
cg03596167	0.968921
cg03657064	-1.93457
cg03697136	3.13329
cg03699385	1.67701
cg03780905	1.67211
cg03786924	6.66731
cg03796249	3.76573
cg03899721	0.473251
cg03915055	-2.08589
cg03982897	2.66833
cg03994381	1.48003
cg04121631	0.829207
cg04135543	1.12183
cg04154138	1.80054
cg04217450	5.64999
cg04291969	1.55917
cg04295991	0.834214
cg04352026	4.04518
cg04356980	7.06973
cg04377145	6.7281
cg04415599	3.09789
cg04474988	2.49505
cg04483289	2.0764
cg04495287	3.09697
cg04498214	4.94212
cg04588079	4.62407
cg04676981	0.695503
cg04680738	-1.91412
cg04691264	-0.566702
cg04750421	2.09531
cg04752989	-3.08293
cg04769618	7.47891
cg04845985	1.7826
cg04943625	4.2697
cg04972856	0.837845
cg04978266	0.202892
cg05019187	-1.20868
cg05028089	1.79376
cg05028795	2.12206
cg05034702	4.52414
cg05081033	3.07906
cg05096634	4.72
cg05119514	3.547
cg05140031	1.03606
cg05148900	3.55474
cg05149386	5.06874
cg05155578	3.31189
cg05199226	1.86782
cg05263883	-1.48414
cg05319845	1.44493
cg05356308	2.37487
cg05360158	5.31504
cg05427966	4.30618
cg05447008	10.2277
cg05530568	1.60933
cg05559558	7.00715
cg05590723	-1.19023
cg05598363	1.62704
cg05613447	2.3049
cg05621343	2.42659
cg05628782	1.38544
cg05645404	1.5059
cg05651283	1.08419
cg05720159	4.41763
cg05730301	1.22283
cg05766122	-0.0765336
cg05789711	1.54743
cg05804220	4.57745
cg05835456	0.451337
cg05872540	0.0810463
cg05881627	2.37871
cg05892960	3.54844
cg05894719	3.51224
cg05899103	4.28784
cg06035815	6.11521
cg06047326	-2.49349
cg06102612	2.61575
cg06102790	3.18656
cg06144675	3.7463
cg06149302	2.25891
cg06167719	5.8232
cg06206603	0.974544
cg06238409	3.74234
cg06305048	0.0764427
cg06320401	-0.298683
cg06450650	1.61246
cg06481786	4.11851
cg06506966	1.5462
cg06513420	0.0949497
cg06572115	-1.08422
cg06590513	3.63851
cg06610571	-2.49994
cg06611358	2.92475
cg06646705	3.80087
cg06647818	-2.60191
cg06649808	2.22661
cg06686058	0.228473
cg06765813	-0.124864
cg06846279	-0.350375
cg06871074	2.29014
cg06904403	0.47668
cg06934851	2.41221
cg06963233	3.95811
cg07091781	-0.31248
cg07136888	5.01585
cg07137336	4.44234
cg07139762	4.16324
cg07169834	3.99661
cg07231981	1.53795
cg07237939	9.44035
cg07241925	-0.86816
cg07256113	0.687026
cg07258695	0.800457
cg07320850	0.985697
cg07322678	3.49659
cg07339464	-1.38625
cg07349212	1.0555
cg07362341	4.63145
cg07389627	1.406
cg07395094	4.47189
cg07475885	3.72057
cg07518532	1.9736
cg07592361	2.70495
cg07732735	2.04221
cg07750339	-3.64043
cg07751698	3.98112
cg07754143	0.620544
cg07771539	3.74402
cg07829071	-0.309584
cg07841477	2.12254
cg07883823	4.11252
cg07888040	-0.634411
cg08001895	3.96819
cg08001909	3.3161
cg08012672	1.31952
cg08031368	4.6992
cg08063211	1.27059
cg08137080	2.14603
cg08143003	3.66725
cg08170869	1.63378
cg08180257	5.32552
cg08212128	2.41481
cg08224787	-0.998315
cg08245989	-2.65752
cg08251815	3.01817
cg08259810	5.23873
cg08274870	3.61823
cg08303612	2.85935
cg08310866	1.36859
cg08328777	3.14671
cg08339602	0.745423
cg08349678	4.05526
cg08367083	5.79092
cg08397273	6.74095
cg08431693	1.48624
cg08446047	3.03629
cg08454485	4.19154
cg08519233	3.60549
cg08555013	1.43607
cg08623787	3.07975
cg08682607	0.439019
cg08703324	0.604029
cg08728735	-2.92509
cg08734918	-0.189925
cg08836619	0.867959
cg08853659	5.16402
cg08885837	0.546334
cg08905496	0.658385
cg08921919	3.3838
cg08952590	4.25793
cg08961196	1.60806
cg08961547	2.02231
cg09011742	6.94118
cg09037712	4.75043
cg09059589	0.495532
cg09068158	1.99034
cg09119967	3.53345
cg09146471	1.38714
cg09160017	1.65389
cg09178261	3.83649
cg09180262	2.36196
cg09187933	5.63335
cg09202224	1.86375
cg09222287	1.43743
cg09254098	1.64651
cg09287405	7.65564
cg09303936	6.49638
cg09305334	0.934332
cg09313053	3.64351
cg09374774	2.41025
cg09374949	2.02317
cg09382942	-2.40341
cg09384787	4.93025
cg09395318	0.275228
cg09420637	1.40776
cg09445448	2.12158
cg09488203	2.26287
cg09491380	-4.13316
cg09639735	2.11271
cg09684136	2.57666
cg09753377	0.548123
cg09761088	0.486595
cg09808864	3.46063
cg09869647	1.35685
cg09919570	3.22487
cg09925562	1.60861
cg10009657	-4.05574
cg10035469	1.9526
cg10051935	0.404813
cg10093882	1.81807
cg10098010	3.363
cg10122477	4.819
cg10133725	-1.80617
cg10133925	3.79345
cg10140114	3.36417
cg10196309	-0.249986
cg10201668	0.914737
cg10219192	-1.86739
cg10271058	2.2365
cg10325336	1.13826
cg10364513	3.85864
cg10425754	-0.518772
cg10442251	2.60179
cg10446179	1.31066
cg10478435	2.10304
cg10496082	2.76887
cg10559416	-0.806362
cg10583297	4.99315
cg10601026	2.43877
cg10604396	5.35393
cg10633363	2.57776
cg10705541	1.56112
cg10724425	1.87963
cg10739095	1.80851
cg10740054	1.45067
cg10755319	2.06484
cg10760320	4.10207
cg10828210	1.36924
cg10832025	3.44507
cg10833629	2.07948
cg10904748	-1.38961
cg10905401	2.78045
cg10905918	1.54973
cg10914710	1.64255
cg10985440	3.19268
cg11008243	8.6895
cg11042214	1.63284
cg11082779	-2.66858
cg11096149	2.16438
cg11102782	2.11607
cg11230298	3.98848
cg11252118	0.406255
cg11279444	5.25666
cg11279918	3.36507
cg11310629	0.299688
cg11392389	1.9351
cg11413133	4.38228
cg11460820	1.32463
cg11503011	2.06462
cg11515215	2.16907
cg11525020	-5.05198
cg11540553	1.66487
cg11560312	1.0331
cg11569979	1.87097
cg11575901	0.877591
cg11576274	3.33588
cg11640175	2.62103
cg11642681	1.54272
cg11717564	3.64632
cg11732037	1.69825
cg11753540	4.04023
cg11821086	3.67362
cg11850638	0.332298
cg11993539	2.73045
cg12048031	3.93568
cg12177677	-0.217169
cg12183741	0.327565
cg12228707	0.470096
cg12255897	3.29263
cg12266546	-2.24477
cg12280209	2.67558
cg12309516	-0.0340251
cg12315302	1.263
cg12320306	0.626269
cg12350822	0.77811
cg12356951	-0.577375
cg12370791	3.83015
cg12382398	3.81219
cg12404281	-0.188906
cg12433713	2.06591
cg12454161	1.41996
cg12479139	0.333385
cg12513481	-0.45998
cg12525584	4.49395
cg12537168	2.39313
cg12547943	0.664767
cg12555306	9.90153
cg12588763	0.416793
cg12611723	3.44416
cg12624829	-0.0132231
cg12650655	0.13402
cg12702981	1.40647
cg12721730	2.31833
cg12828479	8.02207
cg12831925	1.11714
cg12835784	-3.50841
cg12953095	1.67689
cg12967050	-1.60727
cg12987984	0.283944
cg13028554	-0.425494
cg13030331	2.95909
cg13096541	5.01094
cg13117777	2.88119
cg13147822	7.40517
cg13195837	0.994957
cg13218425	2.40885
cg13219108	1.72265
cg13252030	2.34146
cg13256398	0.649129
cg13339907	0.678979
cg13359948	8.13268
cg13393110	2.57562
cg13401703	1.69098
cg13441983	1.21454
cg13491690	2.8852
cg13509147	-2.09563
cg13531509	0.213443
cg13604246	3.68084
cg13605988	-0.989577
cg13610457	-0.155398
cg13633361	3.12532
cg13635007	1.46725
cg13643585	2.48244
cg13652557	8.24275
cg13765368	1.93617
cg13830636	1.97266
cg13837913	1.82672
cg13901501	5.02888
cg13947892	2.34664
cg13958983	2.62888
cg13961784	0.213394
cg13968580	-1.51088
cg13985132	4.98006
cg13994321	1.05287
cg14098442	5.97406
cg14183444	0.526515
cg14224937	2.32523
cg14228238	5.49507
cg14233507	2.13533
cg14235793	10.4318
cg14254080	1.61273
cg14282596	0.0629537
cg14298951	1.21495
cg14329675	11.7798
cg14370485	2.4328
cg14371439	-5.81387
cg14373018	-2.41677
cg14386312	1.9223
cg14418720	1.40458
cg14435603	0.746225
cg14489205	1.95608
cg14498074	2.92263
cg14498423	2.61214
cg14534336	1.48311
cg14556070	4.59907
cg14564692	5.24875
cg14602438	3.7178
cg14629410	0.928938
cg14644166	4.09018
cg14678223	-1.71773
cg14785464	4.63512
cg14827527	-0.465108
cg14874346	-0.616041
cg14908680	0.716891
cg14914958	2.80249
cg14960414	-1.9266
cg14970695	6.55649
cg14987534	0.624271
cg15035350	1.06458
cg15073853	3.34061
cg15105703	0.369488
cg15109150	-0.0065492
cg15133448	3.23171
cg15139596	-2.51297
cg15182360	3.11773
cg15272956	-2.12152
cg15284809	-2.19786
cg15344419	5.29858
cg15415507	1.01356
cg15418155	1.86185
cg15465615	2.35746
cg15483964	0.760116
cg15511286	-3.78874
cg15571730	2.38453
cg15681295	1.49954
cg15717808	7.09831
cg15730346	0.768592
cg15766075	3.92326
cg15830441	2.37806
cg15839219	3.37476
cg15883329	1.82677
cg15889913	4.35745
cg15896339	1.05006
cg15921757	1.65051
cg15944766	1.71538
cg15969359	5.91269
cg16021896	4.7009
cg16052317	1.03106
cg16063519	0.673686
cg16068620	3.47922
cg16087412	1.95753
cg16162391	4.45154
cg16187092	5.30498
cg16198151	2.97505
cg16234900	1.54529
cg16246961	9.33841
cg16338347	4.02281
cg16346212	1.44267
cg16380351	-1.82255
cg16384137	-2.16637
cg16465083	2.01003
cg16552437	2.35967
cg16574065	4.40676
cg16661609	-1.09428
cg16661654	0.548151
cg16700924	-0.636052
cg16708981	1.83529
cg16750741	0.229466
cg16786481	0.622808
cg16789104	2.04849
cg16805150	4.11214
cg16833778	1.50443
cg16852194	-0.749552
cg16854524	-0.259473
cg16877615	0.169786
cg16897885	1.93422
cg16898833	1.11257
cg16911583	-2.12232
cg16927606	-0.567197
cg16934826	-3.1152
cg16943083	1.52132
cg16951385	0.135216
cg17009297	3.07805
cg17036833	0.613433
cg17108838	1.16723
cg17160382	1.66794
cg17167807	-1.19973
cg17217219	5.9084
cg17229388	0.0993795
cg17232003	5.49143
cg17232014	1.86565
cg17327430	1.0625
cg17327990	0.564777
cg17354476	1.73602
cg17364114	3.7863
cg17430393	2.35838
cg17438432	-0.782442
cg17498101	0.88033
cg17503287	1.53607
cg17503977	4.23439
cg17508462	5.45808
cg17514495	0.115477
cg17526999	3.8763
cg17550268	4.77075
cg17571926	-2.07249
cg17611765	3.67566
cg17650272	0.566058
cg17656098	-2.03836
cg17666131	-0.179609
cg17683110	2.21057
cg17696377	2.73927
cg17730759	0.105201
cg17734946	4.38015
cg17751746	3.39606
cg17759329	-0.414102
cg17784403	5.26538
cg17851657	3.43504
cg17859659	2.04564
cg17875483	3.12343
cg17885806	3.6994
cg17891968	-1.22455
cg17902858	2.83027
cg17903776	4.08185
cg17936488	0.200631
cg18070969	-2.08226
cg18081171	3.23656
cg18086592	4.82353
cg18088242	2.92103
cg18090489	1.66047
cg18146843	4.18011
cg18158391	4.6767
cg18192222	4.20025
cg18228282	5.31579
cg18239337	5.03062
cg18261462	4.59248
cg18283779	0.452961
cg18314921	-2.56372
cg18315638	0.91949
cg18321943	2.22254
cg18335068	3.96718
cg18375494	2.29591
cg18428626	5.70017
cg18430624	0.690266
cg18444028	-3.56699
cg18470229	3.9938
cg18507138	1.60433
cg18671854	4.37778
cg18686499	0.231946
cg18696325	3.89172
cg18735601	2.6746
cg18756498	2.9873
cg18863848	1.92699
cg18867004	1.44119
cg18908258	1.14249
cg18945420	2.28765
cg18973011	3.05154
cg19023800	5.10797
cg19109608	7.62209
cg19115492	1.04699
cg19153567	2.10365
cg19165274	3.57949
cg19234014	2.8583
cg19289599	3.06306
cg19295951	1.88261
cg19315081	1.71212
cg19374755	2.09174
cg19382657	3.54706
cg19392551	2.32346
cg19405555	3.20259
cg19425295	2.48803
cg19431296	4.02848
cg19455840	1.89885
cg19461621	3.61234
cg19474239	1.57343
cg19478374	3.68164
cg19501726	-1.72122
cg19504032	1.48505
cg19517378	2.03619
cg19570640	4.65997
cg19596204	1.73721
cg19651223	4.26347
cg19669771	1.93842
cg19674669	2.74087
cg19678730	-0.0660247
cg19714940	0.863941
cg19743759	0.969152
cg19771372	-0.252765
cg19801705	3.52347
cg19848683	5.05407
cg19850463	0.593744
cg19864851	0.0142875
cg19870668	3.99854
cg19884345	3.0317
cg19893964	5.22029
cg19903071	3.33937
cg19974356	7.84119
cg19990689	-1.06418
cg20002504	3.21995
cg20137461	-1.01604
cg20149973	3.06805
cg20154618	-0.616854
cg20176532	6.17654
cg20191310	0.859977
cg20244854	2.8996
cg20253378	4.02202
cg20266154	3.61133
cg20282550	5.08538
cg20449590	5.55146
cg20451727	1.34231
cg20600845	4.85336
cg20640432	-3.68267
cg20642006	-1.56543
cg20653012	5.65467
cg20692810	0.728807
cg20706134	1.4023
cg20741987	1.33486
cg20744625	11.0382
cg20779757	2.61582
cg20809771	0.1633
cg20908828	5.88071
cg20910875	1.69362
cg20955022	0.990384
cg20971610	5.65411
cg20986652	1.32897
cg21020710	2.61801
cg21026663	3.16645
cg21039208	3.66032
cg21067023	4.20985
cg21073748	1.10844
cg21080921	-1.84278
cg21155461	6.31648
cg21159993	1.73295
cg21167046	-3.01974
cg21199397	6.073
cg21308062	-2.47095
cg21309469	0.0959345
cg21319458	0.803598
cg21326139	-2.76781
cg21370869	1.86272
cg21416022	1.24052
cg21422770	4.3203
cg21442599	1.70945
cg21448625	1.43117
cg21552709	2.82862
cg21667047	0.825902
cg21671983	2.16767
cg21689782	-1.39549
cg21692846	3.30637
cg21747958	6.2112
cg21801539	1.44701
cg21824460	4.45214
cg21878074	2.16176
cg21890448	-4.93911
cg21907914	1.82115
cg21908235	1.30998
cg21962901	3.45419
cg21994576	0.519966
cg22080027	0.565624
cg22102391	0.189561
cg22129639	2.02856
cg22146252	2.33287
cg22212238	-0.356518
cg22362895	1.12025
cg22363783	4.11603
cg22389950	1.86887
cg22404498	-2.00633
cg22430950	0.0347338
cg22434226	3.71689
cg22434763	1.23556
cg22458693	-2.89418
cg22490861	4.26289
cg22492966	0.856817
cg22610211	4.89084
cg22632069	0.827749
cg22640344	1.28032
cg22646995	4.81756
cg22648885	1.02618
cg22669412	3.79247
cg22675486	1.9795
cg22710306	1.20429
cg22731359	9.12064
cg22749310	-0.347015
cg22758486	1.42491
cg22862441	1.58442
cg22903908	3.45589
cg22920635	-2.43402
cg22936975	5.29638
cg22952834	1.7713
cg23010629	3.75698
cg23135908	0.867404
cg23155965	2.79648
cg23170850	2.6016
cg23173157	0.728509
cg23181201	6.20764
cg23232416	0.483633
cg23313604	-0.208638
cg23315078	6.63657
cg23435671	1.57002
cg23440882	1.5273
cg23447233	-3.76593
cg23484087	8.60751
cg23496400	0.393593
cg23500931	3.86987
cg23531257	-1.13946
cg23620279	2.31754
cg23623142	0.140251
cg23655957	2.3304
cg23777956	-2.8984
cg23808004	3.19752
cg23896056	2.44694
cg23964682	5.0474
cg24045482	0.479298
cg24057953	-0.295473
cg24084363	1.97996
cg24096925	3.23378
cg24124029	1.48172
cg24129382	2.31461
cg24173411	3.94813
cg24199766	0.28656
cg24216889	2.8479
cg24222435	0.889767
cg24259560	-4.55381
cg24303394	4.38995
cg24322968	1.8183
cg24362926	2.8728
cg24396429	-3.07007
cg24413819	-0.597337
cg24431141	-3.25881
cg24465592	2.36495
cg24479965	-0.358633
cg24480765	-2.31963
cg24505618	7.22354
cg24523456	-0.105472
cg24524915	1.75655
cg24555067	3.87896
cg24595791	0.629182
cg24597363	-3.63792
cg24606595	0.566138
cg24629380	0.0274049
cg24680439	3.54134
cg24685755	0.183698
cg24687051	5.90603
cg24778896	3.6943
cg24846416	2.35593
cg24848491	-3.12182
cg24868421	1.40858
cg24958325	-0.163813
cg24969605	1.2305
cg24992690	-0.40552
cg25010124	0.280416
cg25032535	4.88437
cg25049341	5.65519
cg25125450	-3.01531
cg25162403	0.159002
cg25289314	2.84988
cg25313204	2.54276
cg25332295	3.63916
cg25338636	-2.04807
cg25385940	1.5292
cg25404339	2.1289
cg25446309	6.80355
cg25497250	2.15121
cg25562664	2.37559
cg25665603	4.21433
cg25810938	1.15975
cg25825627	1.63339
cg25828181	0.989503
cg25841943	8.04779
cg25959149	-4.43115
cg25975071	-1.48009
cg25999867	2.94282
cg26058714	4.16376
cg26137478	6.08454
cg26163234	1.06604
cg26165853	1.60832
cg26224311	2.34892
cg26230417	2.59211
cg26238800	1.20549
cg26263234	5.68221
cg26263766	3.71636
cg26284098	-0.674022
cg26294710	3.17049
cg26299239	-2.08352
cg26318265	2.90412
cg26338947	-2.64297
cg26364278	3.00562
cg26401955	1.68431
cg26432190	-0.074162
cg26436200	1.22013
cg26452056	2.92805
cg26452654	1.43077
cg26477748	1.98724
cg26494441	-1.79346
cg26580895	4.03177
cg26590064	1.53939
cg26648592	1.02008
cg26672999	0.381293
cg26701408	0.905321
cg26777836	6.14509
cg26818821	2.10618
cg26845363	1.07372
cg26858268	0.899608
cg26866707	-0.453277
cg26879813	2.86707
cg26884276	1.73778
cg26901921	0.947536
cg26908950	1.29306
cg26952936	0.868777
cg26989927	2.8541
cg27089125	4.35235
cg27117860	3.11521
cg27163099	1.32449
cg27194966	8.26326
cg27326642	1.92468
cg27328965	3.44598
cg27347265	0.626589
cg27385032	3.21818
cg27388983	1.82728
cg27390819	2.05736
cg27394093	3.79029
cg27422348	1.18579
cg27484181	7.96857
cg27501190	3.85338
cg27504117	1.08552
cg27519424	6.90317
cg27530799	-2.0057
cg27558396	4.0456
cg27596707	2.01081
cg27596786	1.04905
cg27605228	-4.26626
cg27617775	1.73919
cg27620230	2.94264
cg27621724	1.3251
