# Supplementary material for: Global hypo-methylation in a proportion of glioblastoma enriched for an astrocytic signature is associated with increased invasion and altered immune landscape
Source: eLife journal article supplement (doi:10.7554/elife.77335), 2022-11-02
Supplement: fig1-data1 [file Figure1A_1H_dmr_res_all.xlsx]

## Sheet: 017
dmr_id	median1	median2	median_change	padj	pval
9	-0.225328	-3.51505	3.06673	0.00401969	0.00204697
15	2.54937	-0.559688	2.59334	0.00269016	0.00124244
19	-1.3833	-3.02294	2.18669	0.00125602	0.000499717
27	-0.406787	1.64699	-1.86094	0.00421431	0.00216188
29	-3.09079	0.395123	-3.39276	0.00276573	0.00131733
42	0.926743	-3.95911	5.14856	0.000880655	0.000326797
55	1.92139	-0.257776	1.98399	0.0027073	0.00125906
85	-3.47325	2.90739	-6.34387	0.00125602	0.000499717
104	-3.81256	0.882126	-4.74063	2.06859e-05	2.71935e-06
106	-0.934126	-4.41905	3.43309	1.05071e-10	1.04086e-12
124	-0.86185	-3.75267	2.66044	0.00271733	0.00129282
133	-3.94633	2.21381	-5.66946	8.48633e-05	1.71999e-05
135	-3.39571	2.16051	-5.73261	4.75335e-06	4.26728e-07
136	-2.31152	2.13846	-4.45361	9.19758e-05	1.90354e-05
140	-5.30915	-2.08437	-2.5397	0.00127127	0.000511237
142	-0.232886	-3.88123	3.75874	0.000606012	0.000215471
146	3.15577	-3.31013	6.29205	0.000344513	0.000107735
147	-0.582251	-2.8757	2.37188	2.84629e-06	2.00421e-07
150	-2.15824	-3.68051	1.87347	0.000774796	0.000281914
152	-1.14427	-4.17507	2.99573	0.000278705	6.87994e-05
166	-4.10971	0.181981	-4.00938	9.19758e-05	1.90354e-05
175	0.184235	-4.22681	4.16753	1.80601e-05	1.997e-06
176	-5.26877	-3.52233	-1.40185	0.00281676	0.00134616
179	1.4706	-2.11888	3.38705	0.00177899	0.000773994
181	-3.16077	0.793966	-4.15488	2.55611e-07	1.0334e-08
182	-2.47234	1.49561	-4.2397	0.00110018	0.000430942
184	1.17182	-3.82049	4.98596	2.06859e-05	2.71935e-06
198	-3.8002	-0.385625	-3.10173	0.0020837	0.000919953
221	-3.73531	-0.609686	-2.97547	0.00186221	0.00081269
230	-4.13645	0.979191	-4.7965	0.00816697	0.00477117
241	-3.67453	-1.93622	-1.52187	0.00744741	0.00423117
249	-3.82025	-0.296349	-3.60299	8.48633e-05	1.71999e-05
263	1.3016	-2.88863	3.86603	0.00784331	0.00450868
265	0.392095	2.53297	-1.98382	0.00101124	0.000382025
277	3.58423	-0.125419	3.72476	4.78602e-18	3.84419e-21
291	-3.5954	-1.52706	-1.79589	0.00812167	0.00474036
330	-4.31625	-2.12222	-1.6599	0.00127127	0.000514208
336	-2.46755	1.03219	-2.88015	0.00744741	0.00423117
344	2.46284	-2.12025	4.6063	0.00072333	0.000261057
345	-2.89284	1.69665	-3.35125	0.0021193	0.000943613
358	-0.823068	2.64734	-3.47041	0.00175526	0.000754148
360	2.16335	-2.21076	4.23185	0.000595288	0.000206398
381	2.80584	-2.66321	4.78335	2.06859e-05	2.71935e-06
382	-4.64942	-2.1425	-2.19844	0.00271733	0.00129282
386	-2.59134	2.42503	-4.91437	0.000344513	0.000107735
389	0.260057	-5.24358	4.57421	0.000959725	0.000358452
395	-1.59329	1.39534	-3.02091	0.00331069	0.00161679
405	4.04304	-3.77581	7.38629	4.75335e-06	4.26728e-07
419	-0.5629	-3.51868	3.31202	4.75335e-06	4.26728e-07
420	-0.607956	-4.75614	3.3954	1.88776e-06	1.2484e-07
431	3.59651	-0.57469	3.97132	6.37033e-07	3.03593e-08
434	-0.372429	-2.65313	1.77995	0.00359812	0.00178028
437	0.35447	3.07726	-2.74476	1.96426e-10	2.10362e-12
438	0.933511	-1.32759	2.52866	1.51504e-19	8.11265e-23
439	1.40553	-2.64999	4.16917	8.15818e-08	2.44636e-09
440	0.563439	-4.23802	4.42088	1.21072e-08	2.0746e-10
445	-4.48689	-2.48979	-1.94284	0.000151871	3.3324e-05
448	-3.38587	-1.473	-2.15395	0.001447	0.000591974
452	0.575744	2.37658	-1.62199	0.00335619	0.00165608
468	-2.10409	-3.83575	1.98066	2.04826e-07	6.69043e-09
495	0.714482	2.31448	-1.56458	0.00638759	0.00356234
514	2.36417	-0.202652	2.91792	0.0024795	0.00113519
531	-0.0988283	1.27138	-1.81087	0.00176345	0.000759677
541	1.73736	-3.17046	4.22974	0.00523078	0.00275334
550	-0.228363	-3.91269	3.79946	2.06859e-05	2.71935e-06
557	-2.57817	2.46594	-4.85787	6.72633e-05	1.08774e-05
563	-0.790764	2.08811	-2.87888	0.00110018	0.000430942
565	-4.80148	-3.16808	-1.72232	0.00948744	0.005695
569	-4.66266	-0.778602	-4.00489	6.32148e-11	5.41599e-13
577	3.08887	-2.86032	6.00292	0.000151871	3.43997e-05
581	-4.42566	-0.833276	-2.6946	0.000857672	0.000313217
593	-3.47932	-0.378561	-3.03942	1.08099e-06	6.65668e-08
599	0.153015	2.72056	-2.4548	0.000595288	0.000206398
602	-4.09957	-1.33225	-2.72102	1.57028e-05	1.70691e-06
610	3.46666	-2.49423	5.90441	1.08099e-06	6.65668e-08
613	-5.09654	-2.75855	-3.13764	1.08099e-06	6.55846e-08
614	-4.44193	0.0927633	-3.70573	0.000378983	0.000122371
628	0.168862	-2.79177	2.9504	0.000344513	0.000107735
630	-0.235956	1.33427	-1.79859	8.48633e-05	1.71999e-05
639	-4.39085	-2.83638	-1.40993	0.0021193	0.000938312
646	2.59026	-0.719095	3.12372	0.000322778	8.15804e-05
657	-0.772822	2.174	-2.92996	2.06859e-05	2.71935e-06
659	-2.97559	0.874266	-3.67362	2.06859e-05	2.71935e-06
678	-3.08818	3.09776	-5.83125	2.35757e-07	8.07948e-09
685	-0.149683	2.52982	-2.92629	0.00587433	0.00323206
699	0.678635	2.66871	-2.01267	4.75335e-06	4.26728e-07
708	2.90195	-0.329686	3.1234	0.000344513	0.000107735
709	-3.19549	2.11453	-5.31003	8.48633e-05	1.71999e-05
715	-4.03802	-1.90229	-1.82314	0.00946662	0.00564155
732	-4.05873	-1.83476	-2.51799	0.000595288	0.000205159
733	2.10233	0.101731	1.9562	0.00116283	0.000457662
736	-2.63626	0.21854	-2.95832	0.00146213	0.000601687
761	2.93033	-2.74376	5.91514	9.20239e-11	8.86977e-13
764	3.01045	-1.46593	3.66412	0.00271733	0.00129282
766	-3.84123	-0.213549	-3.29698	9.37353e-05	1.95e-05
817	-2.22107	-4.62044	2.39937	0.00544078	0.00290175
822	-4.0679	-1.85406	-2.26353	9.19758e-05	1.90354e-05
830	-1.83422	2.97042	-4.89765	4.75335e-06	4.26728e-07
839	-0.49967	2.52324	-3.0831	3.12759e-06	2.22102e-07
840	-1.62736	-4.23493	2.61211	0.000243862	5.79131e-05
844	0.249855	2.48689	-2.31916	8.48633e-05	1.57283e-05
867	-3.52071	0.109284	-3.81296	9.59662e-08	2.95478e-09
878	-1.80619	0.40347	-2.364	0.00072333	0.000261057
887	2.84915	0.345185	1.92961	0.000278705	6.87994e-05
888	-1.08651	2.53654	-3.36009	0.0078253	0.00446891
902	-4.48477	-1.20687	-3.42247	8.48633e-05	1.71999e-05
917	-0.295559	-3.64476	2.55633	0.00367985	0.00182564
926	-3.41176	2.27822	-5.58458	0.000344513	0.000107735
941	-0.422341	1.7547	-2.27131	0.00577344	0.00311318
945	-1.77062	1.304	-2.9549	0.000344513	0.000107735
951	0.082554	-3.93465	4.0172	0.00587433	0.00323206
958	-4.33077	1.47356	-5.91535	2.56938e-09	3.78356e-11
993	-3.52199	0.584963	-3.92431	8.48633e-05	1.71999e-05
1005	2.95989	0.578715	1.76934	0.00166624	0.000691032
1025	-4.45696	2.05173	-6.57465	1.08099e-06	6.65668e-08
1036	0.425608	2.59475	-2.28664	0.00281735	0.00134871
1045	-4.3748	-1.09491	-2.99663	0.00900843	0.00532305
1051	-3.70827	-2.10362	-1.57244	0.000595288	0.000205159
1064	-3.69408	-0.284923	-3.43411	0.000152254	3.45271e-05
1069	-3.52715	-1.55206	-2.04899	0.000183979	4.22142e-05
1074	-2.90962	2.67652	-5.76622	0.000344513	0.000107735
1078	-1.13743	2.73737	-3.46831	2.06859e-05	2.71935e-06
1084	-2.61502	1.98801	-4.5876	0.00401969	0.00204697
1087	-4.723	-2.07563	-2.1376	0.000748032	0.000270173
1091	-4.09456	0.137248	-3.99393	1.80925e-05	2.01512e-06
1099	-3.96385	1.54352	-5.47414	5.6838e-08	1.59786e-09
1100	-3.03964	-0.448596	-2.62318	0.00401969	0.00204697
1101	-3.16956	2.72528	-5.73317	1.22623e-08	2.46232e-10
1118	-0.466894	2.3488	-3.14193	0.000344513	0.000107735
1132	-3.48949	1.20746	-4.48334	7.00626e-11	6.19027e-13
1153	-4.84991	-2.91741	-1.89691	0.00526076	0.00278461
1154	-1.94964	2.38898	-4.46404	0.00401969	0.00204697
1156	0.563269	3.39883	-2.72057	1.27001e-06	8.05872e-08
1169	-0.0450668	2.15308	-2.47462	0.000204469	4.7244e-05
1191	-1.6861	2.62144	-3.78875	0.000151871	3.43997e-05
1194	-3.18399	-0.259206	-3.13727	6.72633e-05	1.08774e-05
1197	-3.51817	1.84244	-5.08828	2.06859e-05	2.71935e-06
1215	-1.90122	1.19577	-3.02192	8.59207e-06	8.53456e-07
1225	-2.26151	0.342515	-2.1274	0.00331389	0.0016219
1238	0.476829	-4.50149	4.49101	0.00013365	2.85908e-05
1239	0.128806	1.54062	-1.52676	0.00401969	0.00204173
1252	-3.84115	-2.39397	-1.56722	0.00744741	0.00423117
1269	-5.54498	-2.58665	-2.93244	0.000243862	5.79131e-05
1273	-4.186	0.903011	-5.07121	8.48633e-05	1.71999e-05
1281	4.87087	-4.05254	8.26262	8.48633e-05	1.71999e-05
1291	-1.89515	2.58973	-3.71321	0.00452729	0.00236365
1296	-1.79802	0.961129	-3.2358	0.00895136	0.00528693
1308	-0.307875	-3.44795	2.30592	0.000278705	6.71478e-05
1312	3.05472	1.91732	1.67026	0.000880655	0.000326797
1333	-0.403181	1.96821	-1.60683	0.00638759	0.00354355
1339	-3.0256	-0.403711	-2.26655	8.19568e-05	1.36266e-05
1345	-2.66461	-0.387214	-2.43305	0.00246685	0.00111619
1350	2.54536	-0.161009	2.63713	0.0020837	0.000919953
1369	-3.1719	2.40451	-5.79815	0.000344513	0.000107735
1394	-1.48346	1.18264	-2.75096	0.00331069	0.00161679
1424	-2.58902	1.7233	-3.9814	6.72633e-05	1.08774e-05
1429	-1.79475	2.65805	-3.92794	6.72633e-05	1.08774e-05
1436	-3.7167	-2.0409	-1.97458	0.00685761	0.00384283
1437	-2.39538	2.52951	-4.2104	0.000344513	0.000107735
1438	-1.4372	-4.31311	2.62498	0.000237697	5.58762e-05
1447	-2.07069	2.31355	-4.29003	0.000606012	0.000215471
1448	-3.75805	2.15995	-5.81863	2.55611e-07	1.0334e-08
1493	-2.44345	-3.80975	1.46103	0.00782952	0.00447341
1512	1.4877	-1.56969	2.69814	0.00144496	0.000589975
1513	0.327786	-3.64814	3.76934	0.00177899	0.000773994
1523	-3.43018	-0.824173	-2.4819	0.000595288	0.000206398
1531	-2.61537	0.279238	-2.84918	0.000595288	0.000206398
1550	-1.93969	0.375078	-2.3678	0.0016787	0.000701591
1554	-2.79695	-0.484462	-2.33486	2.3637e-05	3.21489e-06
1572	-2.22638	1.44628	-3.09757	0.0020837	0.000919953
1585	-1.24045	-3.69099	2.49144	4.52123e-09	7.14196e-11
1600	-0.742877	1.76677	-2.85809	0.00587433	0.00323206
1612	1.25343	2.66746	-1.48237	0.0021193	0.000943613
1614	-2.37463	-3.86865	1.89336	0.000959725	0.000358452
1615	-2.53582	-4.13019	1.51653	0.00213673	0.000952519
1653	-4.34006	-3.3336	-1.5529	0.00577344	0.00311318
1695	-3.38913	-0.765881	-2.3371	0.00895136	0.00528693
1699	-3.82725	-0.604582	-3.21579	0.00744741	0.00423117
1700	2.55969	-2.05976	3.92714	9.19758e-05	1.90354e-05
1713	-3.76493	0.0157722	-3.63744	0.000720666	0.000258575
1720	2.53929	-0.981575	3.52086	0.000595288	0.000206398
1740	3.68254	0.475942	3.13273	7.87243e-05	1.29416e-05
1772	2.25336	-0.770441	3.29562	0.000278705	6.87994e-05
1815	2.46219	-0.971426	3.02584	0.00127127	0.000515996
1831	-4.05098	-2.56366	-1.48258	0.00852478	0.00498934
1851	-4.5004	-1.79904	-2.38293	0.000316254	7.88307e-05
1855	2.84866	0.586901	2.63087	0.00401969	0.00204697
1859	-4.26071	-1.34854	-3.01639	2.06859e-05	2.71935e-06
1861	2.51725	-2.10831	4.56073	0.000344513	0.000107735
1864	2.60682	-0.208903	2.40233	0.00946662	0.00566984
1868	-3.66867	-1.58483	-2.16631	3.92835e-07	1.68283e-08
1887	-2.01532	-0.474924	-1.66455	0.000344513	0.000107735
1893	-1.80637	-0.250931	-1.61694	0.00587433	0.00323206
1895	-3.56017	-1.22818	-2.21474	0.00429487	0.0022078
1915	-2.09165	0.355496	-2.42989	0.00401969	0.00204697
1917	-2.92492	1.02531	-3.3963	0.00744741	0.00423117
1930	-3.67698	-1.48464	-2.02787	0.00367985	0.00182564
1937	2.28858	-2.32543	4.77416	0.000344513	0.000107735
1941	0.705615	-2.43084	3.1133	8.48633e-05	1.71999e-05
1942	1.79379	-4.07731	5.01468	2.40884e-06	1.67684e-07
1955	-1.73571	1.29922	-3.59485	2.06859e-05	2.71935e-06
1957	0.894967	-4.33273	4.19631	0.000880655	0.000326797
1958	1.01541	-0.86522	1.7209	0.00946662	0.00564155
1978	-3.66272	-0.279475	-3.21168	0.00331901	0.00162529
1983	1.76882	-3.35385	3.86669	0.00146213	0.000601687
1984	-3.42654	-0.783673	-2.28298	0.00884009	0.00519755
1985	-3.9002	-0.786832	-3.35879	4.39595e-06	3.40142e-07
1996	-2.06778	2.39244	-4.44413	0.000344513	0.000107735
2006	-2.92119	1.2376	-4.15879	0.000344513	0.000107735
2032	-3.58421	-1.79275	-1.91086	0.000440132	0.000143883
2033	2.71859	0.29515	2.32291	0.00106808	0.000406641
2039	1.90034	0.0677709	2.22676	5.30346e-05	8.10783e-06
2044	2.93628	-3.5596	6.49716	2.55611e-07	1.0334e-08
2046	3.74635	-3.70145	6.98755	0.000344513	0.000107735
2047	2.32073	-2.56413	4.69516	0.000344513	0.000107735
2048	1.54509	-3.03455	4.17563	0.000322778	8.15804e-05
2058	1.19302	-3.24384	4.28828	2.3637e-05	3.21489e-06
2067	-2.75464	0.446829	-3.48582	0.000344513	0.000107735
2069	-3.9293	-1.78481	-2.03412	4.21096e-06	3.24701e-07
2070	-3.13648	-1.04148	-1.48288	0.00577344	0.00310657
2096	-2.02264	1.70768	-4.28981	0.00638759	0.00354355
2100	-1.94631	-4.03711	2.10092	0.000595288	0.000205683
2101	-1.01167	-3.53076	2.84658	0.000344513	0.000107735
2121	2.14779	-0.705231	2.264	0.00948744	0.005695
2127	-0.406579	2.74327	-2.73491	0.000278705	6.87994e-05
2133	0.746723	-4.12473	4.93573	0.000221052	5.16676e-05
2141	2.08631	-0.366829	2.55275	0.000344513	0.000107735
2156	-3.44691	2.15496	-5.34213	0.000489201	0.000161757
2162	-3.59862	1.36828	-4.95058	2.06859e-05	2.71935e-06
2166	-0.301689	-3.80411	3.65643	4.32977e-05	6.45698e-06
2167	2.45657	-2.1253	4.52569	0.000278705	6.87994e-05
2170	2.59374	-0.268735	2.86248	0.000151871	3.43997e-05
2171	3.7236	0.422815	3.26289	6.72633e-05	1.08774e-05
2185	-1.43361	-4.04598	1.97837	0.000924099	0.000343661
2199	2.96098	1.11054	1.75026	0.000344513	0.000107735
2214	-3.39192	-1.23658	-2.15534	0.00587433	0.00323206
2239	-3.9543	2.73123	-6.68554	0.000344513	0.000107735
2251	-4.22652	-2.85514	-1.56185	0.000374761	0.000118599
2261	2.20491	0.975639	1.48284	0.00523078	0.00275334
2265	-0.981656	2.14028	-3.3471	0.00638759	0.00356234
2268	1.75713	-1.28115	2.9859	0.00175526	0.000754148
2269	-3.32649	-0.953295	-2.38126	8.19568e-05	1.36266e-05
2276	1.44026	-2.97344	3.82135	8.48633e-05	1.71999e-05
2294	-2.51441	1.12394	-2.99804	0.00885767	0.00521262
2301	-1.67935	1.81307	-3.53447	0.00744741	0.00423117
2317	-4.44074	-0.103823	-4.21788	8.48633e-05	1.71999e-05
2364	-0.0215343	-3.51452	3.44724	0.000489201	0.000161757
2365	3.58857	-2.09865	5.61519	8.48633e-05	1.71999e-05
2368	3.17109	-2.2233	5.30983	4.48148e-09	6.9592e-11
2369	3.13262	-3.34695	5.86804	8.48633e-05	1.71999e-05
2370	3.21881	-3.25905	6.507	0.000344513	0.000107735
2372	1.74933	-2.62906	4.04939	0.000421749	0.00013776
2381	2.25332	-1.60992	3.81426	0.000344513	9.83191e-05
2386	-4.94456	-1.67738	-3.26718	3.70685e-05	5.43869e-06
2416	-3.74741	-0.700726	-2.57887	0.000111767	2.36102e-05
2422	-4.22851	-0.669231	-3.1666	6.53772e-06	6.16138e-07
2438	-4.15507	-2.06589	-2.0535	0.00175526	0.000754148
2440	-3.78762	-1.15773	-2.34517	0.000595288	0.000203471
2446	-0.671659	2.46086	-3.07058	0.00127127	0.000515996
2462	-1.26294	2.12434	-2.90359	0.00812167	0.00474036
2463	2.23892	-2.94831	4.88845	5.6838e-08	1.59786e-09
2466	-4.76511	-1.33942	-3.26862	0.00175526	0.000754148
2478	-3.53938	-0.272408	-3.26698	0.00398626	0.00199793
2481	-3.43132	1.44138	-4.14608	0.00110018	0.000430942
2483	-3.41147	-0.241679	-2.49378	0.000151871	3.43997e-05
2485	-4.4138	-2.58029	-1.46019	0.00059258	0.000200383
2494	-3.28237	-1.40256	-2.06679	0.0076298	0.00435113
2503	-4.4343	-1.38815	-2.40671	0.000378983	0.000121866
2521	2.87677	-0.502803	3.10387	0.000606012	0.000215471
2571	1.94396	0.057695	1.86417	0.00526076	0.00278461
2572	3.28903	0.832793	2.1406	0.000489201	0.000161757
2574	-5.06582	-3.03636	-2.16231	0.00784331	0.00450868
2575	-3.56178	1.20267	-4.37999	0.00110018	0.000430942
2581	-0.412059	2.92862	-3.34068	0.000466328	0.000153195
2583	-3.40452	1.2465	-4.24136	0.000344513	0.000107735
2586	-3.45873	-1.95328	-1.88078	5.30346e-05	8.10783e-06
2618	-0.59955	1.90312	-2.21336	0.00106249	0.000403661
2627	1.18777	2.42963	-1.62363	0.000543967	0.000182196
2628	-4.64161	-2.00099	-2.55048	6.72633e-05	1.08774e-05
2631	2.12222	-2.76593	4.76774	2.06859e-05	2.71935e-06
2632	-4.06617	-2.24516	-1.71238	0.000344513	0.000102428
2649	-2.10611	0.865121	-2.97123	8.23905e-07	4.13358e-08
2651	0.557941	2.77029	-1.99562	9.19758e-05	1.90354e-05
2660	-3.28321	2.19715	-5.04659	3.61549e-05	5.12074e-06
2680	-3.70831	-1.74293	-2.10221	0.00587433	0.00323206
2701	-3.93384	0.477564	-4.12333	8.48633e-05	1.71999e-05
2704	-3.90247	-1.01187	-2.72882	0.000606012	0.000215471
2710	-3.20455	-0.967877	-2.39134	0.000151871	3.43997e-05
2714	-4.59368	-2.9026	-1.62904	0.00629848	0.00347892
2723	-0.653196	2.17604	-2.31483	0.0024795	0.00113519
2735	-2.95543	2.80667	-5.51473	4.75335e-06	4.26728e-07
2738	-1.42309	2.18944	-3.29298	0.00110018	0.000430942
2739	-2.04178	1.27033	-3.38247	0.000982446	0.000369831
2747	2.85742	-1.4117	3.7726	0.0024795	0.00113519
2751	-4.02481	-2.51054	-1.4178	1.40544e-06	8.9557e-08
2769	-1.11175	-4.3905	3.00151	3.87495e-06	2.86342e-07
2777	-4.30531	-1.66865	-2.06146	0.00270046	0.00124792
2779	-1.58595	3.39137	-4.61796	0.00175526	0.000754268
2783	-0.9776	-3.29642	2.35155	8.77699e-05	1.79065e-05
2787	-3.928	-1.24675	-2.71742	3.00896e-05	4.10862e-06
2793	1.74584	-1.39443	3.23467	7.87243e-05	1.2914e-05
2799	-3.79823	-2.3476	-1.45063	0.00755477	0.0043002
2800	-4.27448	-2.64651	-1.65877	3.6886e-05	5.30328e-06
2810	-3.32583	-0.507046	-2.78293	0.000277324	6.66023e-05
2819	-2.85424	-1.17109	-1.68982	0.0071676	0.00402422
2829	-2.72525	-4.44026	1.92622	1.17806e-05	1.21433e-06
2851	-1.09639	-4.39036	2.93314	1.88776e-06	1.2484e-07
2883	-1.51318	1.55054	-2.97306	6.72633e-05	1.07376e-05
2893	-3.59868	-2.29424	-1.41365	0.00895136	0.00528664
2901	-3.63268	-1.69512	-2.00396	0.00638759	0.00356234
2908	-3.40012	0.496332	-3.08857	0.00148935	0.000615676
2918	0.494532	3.18763	-2.43646	1.57028e-05	1.70269e-06
2921	-3.37948	-0.639299	-2.73816	0.00175526	0.000754268
2934	-3.88203	-2.26838	-1.78208	8.22847e-06	8.04121e-07
2936	-0.221211	-4.21505	3.49599	6.64195e-07	3.18315e-08
2938	-2.61725	0.231788	-3.09055	0.000389113	0.000126477
2939	-2.83527	2.22138	-4.90868	0.000344513	0.000107735
2949	4.56106	-2.33161	6.38307	4.75335e-06	4.26728e-07
2950	-4.42737	-2.04409	-1.77139	0.00587433	0.00323206
2953	2.81015	-2.38945	4.73315	5.54706e-07	2.57084e-08
2982	2.80875	-0.251683	3.05246	0.000149915	3.26322e-05
2983	2.05909	-2.94922	4.45054	0.000993552	0.000374278
2985	0.552863	2.67538	-2.2849	0.00217705	0.000976354
2991	0.499391	2.40519	-1.90986	0.0027073	0.00125906
2994	-3.9251	-1.87713	-1.83841	0.00331069	0.00161679
2996	-4.08084	-2.04593	-2.02798	0.000472645	0.00015565
2997	2.12854	-2.37147	4.45975	1.00302e-07	3.14142e-09
3000	-4.0524	-1.38529	-2.3825	3.44016e-05	4.76188e-06
3010	0.748682	-2.93456	2.89316	0.000771773	0.000280607
3014	2.75092	-3.01646	5.61007	5.6838e-08	1.47568e-09
3015	2.42499	-2.55907	4.92466	0.000344513	0.000107735
3016	1.87061	-2.62409	4.15919	0.000880655	0.000326797
3027	1.02456	2.75085	-1.6023	0.00113686	0.000446524
3030	3.21408	-0.654176	5.03821	8.48633e-05	1.71999e-05
3039	3.09235	-1.42055	3.95033	2.3637e-05	3.21489e-06
3076	0.243318	2.92101	-2.52614	0.00110018	0.000430942
3082	-1.99916	-3.95166	1.91432	0.00103643	0.000391819
3089	-2.62859	0.0212532	-2.14909	0.00587433	0.00323206
3096	1.41245	3.18223	-2.11474	0.00271733	0.00129282
3100	-4.56821	0.598268	-4.84132	0.0024795	0.00113519
3103	2.80376	0.760243	2.23212	0.00812167	0.00474036
3107	-3.28282	2.79472	-5.8969	0.000344513	0.000107735
3135	-3.54042	1.79169	-5.05355	0.000344513	0.000107735
3146	-3.62299	-1.18151	-2.82758	0.00895136	0.00528693
3149	0.0451526	-4.13081	4.76423	0.00544078	0.00290175
3159	-3.26043	-1.10338	-2.32298	0.00127127	0.000515996
3170	2.44452	-0.0262301	2.57446	0.000595288	0.000205159
3195	2.54665	-0.744594	3.58193	0.000151871	3.43997e-05
3211	-0.694826	2.04165	-2.08583	0.00266749	0.00122983
3241	-3.28528	-1.37164	-2.21345	0.000472645	0.00015565
3266	-2.88301	0.617779	-3.04328	0.00125602	0.000499717
3271	-3.37581	2.48661	-5.81022	0.000247133	5.88885e-05
3274	-3.69321	2.98122	-6.12844	0.000221052	5.16676e-05
3279	0.811146	-2.79383	4.48627	2.06859e-05	2.71935e-06
3280	-3.3613	-0.622149	-2.65024	0.000595288	0.000205683
3292	-0.620295	-4.08348	2.79602	0.00683363	0.00382391
3296	2.47014	-2.50998	4.67814	0.000344513	0.000107735
3300	1.17475	-3.72534	4.89638	1.04029e-05	1.06397e-06
3344	-3.63569	-0.935574	-2.67465	6.64384e-05	1.0406e-05
3369	0.892484	-4.25192	5.30824	2.06859e-05	2.71935e-06
3370	3.45426	-4.07119	7.96008	2.06859e-05	2.71935e-06
3380	-2.68784	2.62216	-5.18707	4.92284e-10	5.79933e-12
3391	0.473141	-2.72984	3.7694	0.000880655	0.000323981
3395	-3.80987	-0.96795	-2.32783	0.00201813	0.000886142
3408	-4.31343	-1.60983	-2.73896	4.75335e-06	4.26728e-07
3410	-1.36457	2.74884	-4.56062	0.000720666	0.000258745
3420	-1.13518	2.74111	-3.56145	0.000374761	0.000118599
3422	2.36262	-1.23235	3.24959	8.48633e-05	1.71999e-05
3423	-2.11146	1.19891	-2.10145	0.000688354	0.000246038
3435	-2.93097	0.7425	-3.59739	0.000959725	0.000358452
3455	-4.73778	0.557333	-5.22604	1.22623e-08	2.46232e-10
3473	-3.3768	0.42491	-3.78607	2.56938e-09	3.78356e-11
3478	-3.40352	-1.22285	-2.51302	0.0024795	0.00113519
3486	-2.81473	3.29499	-5.52445	0.000344513	0.000107735
3512	-3.65044	1.24656	-4.81675	2.55611e-07	1.0334e-08
3524	-4.28219	-1.92212	-2.52045	7.47221e-11	6.80201e-13
3537	0.330219	2.79971	-2.13385	0.000319504	7.97264e-05
3538	-3.29232	0.805519	-4.08386	9.91951e-05	2.08217e-05
3559	3.69813	1.55451	2.22499	0.00812167	0.00474036
3569	-3.9987	-2.17331	-1.87629	0.000151871	3.43997e-05
3595	1.05867	2.39487	-1.65253	0.00271733	0.00129282
3596	-5.46486	-1.17522	-3.88044	0.000344513	0.000107735
3614	2.89412	-1.11885	4.24819	0.000606012	0.000215471
3621	-3.88461	-0.923006	-2.92119	0.000543967	0.000182196
3629	1.71134	-2.52174	4.23309	0.000180609	4.13926e-05
3643	3.3485	-0.431114	3.6234	5.80651e-07	2.72059e-08
3672	0.810943	-1.23602	1.83804	0.00706741	0.00396607
3680	1.08392	-1.60773	2.94363	0.00437332	0.00227038
3699	-3.90485	-1.72562	-2.44279	0.00335619	0.00165608
3701	1.84271	-3.41954	4.55288	4.78848e-06	4.34617e-07
3708	-3.8504	-1.97003	-1.57391	0.00445188	0.00231712
3716	-1.9892	1.9357	-3.29787	0.00948744	0.005695
3737	-3.99642	0.851374	-4.42119	3.70685e-05	5.43869e-06
3749	-0.240588	-3.85418	3.69017	3.70685e-05	5.43869e-06
3801	-3.76659	-0.884591	-2.61958	0.000375055	0.000120399
3807	3.28718	0.068214	3.03328	2.06859e-05	2.6536e-06
3817	-2.61135	2.16872	-4.36365	0.00217705	0.000976354
3818	-4.13263	0.66495	-4.74564	0.000344513	0.000107735
3831	-2.67366	0.194467	-3.50732	0.000374761	0.000118599
3836	-3.26266	-0.562085	-2.79601	0.00148935	0.000615676
3854	-4.2159	-1.05932	-2.75597	6.00687e-06	5.61285e-07
3856	-3.5365	-0.84187	-2.5767	2.06859e-05	2.6536e-06
3860	2.44639	-1.02356	3.35765	0.00175526	0.000754148
3869	-0.660927	2.93002	-3.47598	0.000190229	4.38009e-05
3882	-4.24672	-2.66724	-1.53913	9.41694e-05	1.96155e-05
3934	0.588452	-2.76455	2.49095	0.000322778	8.1364e-05
3938	-3.37303	1.32231	-4.63755	0.0024795	0.00113519
3940	-4.15469	-1.14055	-2.97112	1.25648e-11	9.41939e-14
3943	-3.70042	-1.06704	-2.24368	0.000240727	5.67175e-05
3970	-3.78634	-1.34742	-1.59193	0.00103838	0.000392834
3971	-3.78314	-1.74637	-2.01481	0.0021193	0.000943613
3973	-0.113295	-3.70384	3.75078	0.000344513	0.000107735
3974	1.0005	-3.22557	3.80767	0.0023203	0.00104367
3985	-4.03371	-0.392468	-3.73684	1.08099e-06	6.64976e-08
3990	0.214413	-2.83778	3.02192	0.00784331	0.00450868
3997	-0.140541	-3.30606	3.35132	0.000178367	4.05446e-05
3998	-3.2557	-1.03981	-2.24794	0.00173315	0.000725744
4021	-3.86915	-0.811412	-3.21157	3.61549e-05	5.06351e-06
4022	-4.23387	-0.724503	-3.08906	0.000149915	3.26322e-05
4023	-2.90806	1.66163	-4.33576	0.00127127	0.000511237
4024	0.761061	-2.43077	3.22797	6.72633e-05	1.07376e-05
4026	3.47626	-1.76194	4.88294	0.000151871	3.43997e-05
4027	3.64433	-3.88716	7.44704	4.75335e-06	4.26728e-07
4028	3.26743	-4.05278	7.32022	8.48633e-05	1.71999e-05
4029	0.446958	-3.72934	4.20619	0.000344513	0.000107735
4030	3.83914	-2.27703	5.85535	8.48633e-05	1.71999e-05
4031	-2.07437	-3.32265	1.72101	0.00279898	0.00133691
4033	1.14893	-3.70292	4.70281	0.000344513	0.000107735
4034	0.359664	-3.22332	3.56137	0.000344513	0.000107735
4035	0.706153	-2.79493	3.4976	8.19649e-06	7.98801e-07
4040	-4.25808	-2.02956	-2.38317	0.000240727	5.67175e-05
4042	-3.63138	2.01276	-5.33803	2.55611e-07	1.0334e-08
4053	-1.86907	1.05158	-2.62644	3.12759e-06	2.22102e-07
4056	-3.146	1.11059	-4.28383	4.75335e-06	4.26728e-07
4064	-3.52642	-0.227243	-3.53154	0.00146213	0.000601687
4065	-2.68659	2.30684	-4.38108	5.05927e-06	4.65028e-07
4066	-4.13117	-2.48696	-1.727	0.00382827	0.0019126
4079	0.240309	-3.38871	3.17083	0.000344513	9.83191e-05
4081	2.49335	-3.17259	5.4278	0.000344513	0.000107735
4082	1.54519	-3.43886	4.62432	0.00577344	0.00311318
4087	3.01688	-0.75872	3.49007	8.12981e-05	1.343e-05
4088	-3.66974	0.483949	-3.73239	0.0020837	0.000919953
4095	-3.23739	-1.07782	-2.08118	0.000375055	0.000120399
4104	-3.62514	0.640184	-4.23613	1.70453e-06	1.10441e-07
4118	-3.45117	-0.517456	-2.89508	0.00537467	0.0028521
4120	-3.87463	-0.0136641	-3.57304	2.66212e-09	3.9914e-11
4131	-3.70726	-0.885022	-2.8398	0.00127127	0.000515996
4135	0.0765395	-3.38382	2.96476	0.000278705	6.8556e-05
4153	3.63981	-0.207387	3.47518	8.48633e-05	1.71999e-05
4156	-1.94137	1.44192	-2.33381	0.0024795	0.00113519
4158	-3.93408	2.57782	-6.44705	0.000344513	0.000107735
4161	0.923459	-1.53283	2.42	0.000359154	0.000113083
4169	-4.30248	-1.89206	-2.24869	0.00526076	0.00278461
4184	-0.553037	2.66109	-2.37385	0.00946662	0.00566984
4207	3.00266	-2.68774	5.70497	4.75335e-06	4.26728e-07
4216	0.0756741	-4.31298	4.34815	8.48633e-05	1.71999e-05
4217	0.639829	-3.1704	3.24672	2.21549e-05	2.99551e-06
4245	-3.18944	1.22922	-3.71354	0.000322778	8.15804e-05
4258	1.10563	-1.45696	2.65522	0.00812167	0.00474036
4264	3.05819	-2.85401	5.3838	5.93651e-05	9.18689e-06
4288	-3.2068	0.12298	-2.92148	0.00596833	0.00329177
4294	-4.11431	-2.36439	-1.62887	0.00271733	0.00129282
4298	-4.67718	-0.842439	-3.89845	2.21549e-05	2.9871e-06
4320	-1.36478	1.95723	-3.36748	0.00110018	0.000430942
4324	0.473683	2.68414	-1.88046	0.00331069	0.00161679
4328	-2.97578	1.13185	-3.84953	0.00127127	0.000515996
4331	-3.64359	0.195221	-3.65962	0.00884009	0.00519755
4359	3.78683	-0.170844	3.18694	0.00246685	0.00111619
4360	-0.267107	2.15937	-2.9825	0.00110018	0.000430942
4361	-0.346831	2.33642	-2.89771	0.00271733	0.00129282
4362	-0.314918	2.07763	-2.27143	0.000344513	0.000107735
4365	-4.07903	3.32684	-6.78862	8.48633e-05	1.71999e-05
4371	0.695708	3.43579	-2.36297	0.00577344	0.00311318
4374	3.43275	1.24026	2.4494	0.000375055	0.000120399
4383	-3.13131	0.700243	-3.66182	0.000344513	9.9123e-05
4387	1.83558	-4.1031	5.33657	9.2013e-07	4.65608e-08
4390	1.52893	-2.17772	3.49443	0.0027073	0.00125906
4396	3.32519	0.460364	2.86483	4.75335e-06	4.26728e-07
4414	-3.66439	-1.72345	-2.32129	0.000606012	0.000215471
4449	-3.7066	-0.120782	-3.63194	0.00032408	8.29507e-05
4454	-4.26622	0.41177	-4.70349	0.000344513	9.83191e-05
4476	2.55454	-1.42982	3.89313	4.75335e-06	4.26728e-07
4480	-3.22161	2.13928	-5.06796	1.04029e-05	1.06397e-06
4491	-3.36217	1.02784	-4.39492	1.57028e-05	1.70691e-06
4495	-0.662357	1.85083	-2.472	0.000982446	0.000369831
4510	3.43959	0.127762	2.41399	0.000659253	0.00023546
4517	1.30691	-1.69078	2.55798	0.00271733	0.00129282
4521	-4.08382	-0.355952	-3.84495	8.48633e-05	1.71999e-05
4528	-4.18526	0.108515	-3.91569	0.00176345	0.000759677
4546	-3.98601	0.898438	-4.4393	1.14971e-06	7.23377e-08
4547	-3.85029	-1.2109	-2.8149	1.08099e-06	6.65668e-08
4557	2.2816	-0.949056	3.44588	0.00127127	0.000515996
4561	2.56552	-1.34309	2.77154	0.00577344	0.00311318
4584	3.58988	0.994456	2.67408	0.000344513	0.000107735
4590	-2.77472	-1.02739	-2.08377	0.00110018	0.000430942
4598	1.65796	-1.27748	3.20121	8.15818e-08	2.44221e-09
4600	-0.648434	-4.01906	3.34891	0.00522187	0.00274165
4602	1.16753	-2.71863	4.65345	3.70685e-05	5.43869e-06
4609	0.640216	-2.91866	3.32496	0.000595288	0.000205683
4611	3.05235	-2.0122	4.81239	8.48633e-05	1.71999e-05
4627	-0.730181	-4.42787	3.44693	2.21549e-05	2.99551e-06
4640	-3.32675	1.62997	-4.81726	3.9556e-08	9.84927e-10
4652	-4.51139	-0.138103	-4.12444	0.00744741	0.00423117
4659	0.300077	-2.52607	3.15736	3.29486e-08	8.06107e-10
4682	3.2259	-2.19007	5.19721	3.73136e-12	2.14703e-14
4691	-4.27191	-2.41217	-1.7916	0.000149915	3.26322e-05
4700	3.1123	0.331982	3.0873	8.48633e-05	1.71999e-05
4709	-1.90651	2.94947	-4.55582	4.92284e-10	5.79933e-12
4715	-3.45827	-0.643858	-2.90367	5.54706e-07	2.58417e-08
4729	3.67844	-3.51284	7.31399	0.000344513	0.000107735
4731	3.0042	-2.3886	4.97886	4.75335e-06	4.26728e-07
4733	-3.29513	-1.42301	-1.95412	0.00114458	0.000449865
4738	0.581908	-4.52623	4.94788	9.88186e-05	2.07162e-05
4742	-2.30281	2.27289	-4.5757	0.00110018	0.000430942
4743	-1.80262	2.95775	-4.76036	8.48633e-05	1.71999e-05
4750	0.0844497	-2.52358	2.84878	0.0016787	0.000701591
4781	-3.6626	-2.22691	-1.76861	0.00271733	0.00129282
4792	2.67771	0.808622	1.6351	0.00972847	0.0058501
4798	-0.482625	2.11177	-2.90603	0.000344513	0.000107735
4825	-3.74637	0.196073	-3.37392	0.00388252	0.00194282
4850	1.41208	-0.861025	2.58083	0.00175526	0.000754148
4869	-3.84228	-1.21496	-2.4378	0.00216601	0.00096731
4918	0.684968	-1.5655	2.0398	0.00946662	0.00566984
4939	3.11563	0.0414241	2.85174	0.00857273	0.00502658
4940	-1.77616	1.80934	-3.44513	6.72633e-05	1.08774e-05
4963	3.1114	-0.567079	3.45282	0.000277324	6.66023e-05
4973	-3.96151	-0.877309	-3.07619	0.000151871	3.43997e-05
4987	3.50509	1.56983	2.4063	3.61549e-05	5.12074e-06
4989	-0.162419	2.31486	-2.38101	0.00884009	0.00519755
4993	-2.53791	-3.68288	1.98209	0.00452729	0.00236365
5002	3.0603	-1.71504	4.78635	0.000344513	0.000107735
5003	1.10424	-3.55139	4.45436	2.06859e-05	2.71935e-06
5022	1.32196	-3.42703	4.08453	8.19649e-06	7.98801e-07
5026	-2.78535	1.62365	-4.409	0.000344513	0.000107735
5035	-4.32996	-2.19122	-2.16503	2.06859e-05	2.47987e-06
5047	3.2304	0.139288	3.11733	0.000389113	0.000126477
5064	-3.57593	-2.18753	-1.5208	0.00246685	0.00111619
5086	-0.886892	2.52613	-3.2355	0.000247133	5.88885e-05
5094	-4.55451	-0.169629	-4.44374	4.75335e-06	4.26728e-07
5108	-4.39934	-1.00165	-3.39769	2.55611e-07	1.0334e-08
5109	-3.68089	-0.840444	-3.09078	3.62489e-06	2.66267e-07
5124	2.8173	-1.12138	3.98558	4.75335e-06	4.26728e-07
5127	-3.88229	-0.207505	-3.16887	0.000559291	0.000187479
5139	-2.44042	0.464352	-3.14706	2.71272e-07	1.1185e-08
5140	1.51093	-0.658058	2.28635	3.23456e-05	4.45997e-06
5141	0.980798	-1.78386	2.72777	3.12759e-06	2.23579e-07
5151	2.91537	-2.39213	5.68823	1.08099e-06	6.65668e-08
5152	3.01583	-1.45944	4.62053	1.08099e-06	6.65668e-08
5156	-2.9822	-0.196091	-2.78038	0.00401969	0.00204697
5157	-3.96422	-2.01881	-2.13897	0.000382142	0.000123595
5184	1.5444	-2.70701	3.9706	0.0016787	0.000701591
5190	1.03538	-2.08362	4.11777	2.06859e-05	2.71935e-06
5199	3.70196	-2.53123	6.1989	8.48633e-05	1.71999e-05
5201	1.55801	-4.06649	5.48366	0.000378983	0.000122371
5202	3.89633	-2.97824	6.69724	2.06859e-05	2.71935e-06
5203	2.60024	-3.46624	5.91959	2.06859e-05	2.71935e-06
5204	2.47621	-2.19714	4.63562	2.06859e-05	2.71935e-06
5211	0.868652	-2.17082	3.48156	1.39985e-05	1.48418e-06
5212	2.97165	-3.20932	6.06343	0.000344513	0.000107735
5220	-0.62196	2.42245	-3.15722	0.000151871	3.43997e-05
5225	1.61605	-2.98903	4.53386	0.000344513	0.000107735
5226	3.56632	-1.83916	5.64796	8.48633e-05	1.71999e-05
5227	0.178855	-3.7017	3.88637	2.55611e-07	1.0334e-08
5229	1.85497	-3.67109	5.02601	8.48633e-05	1.71999e-05
5230	-0.386417	-3.51806	3.62828	3.12759e-06	2.23579e-07
5232	3.55786	-3.50155	7.09108	2.55611e-07	1.0334e-08
5234	1.41041	-2.22532	3.17596	8.48633e-05	1.71999e-05
5235	1.81673	-3.54086	4.66995	0.000344513	0.000107735
5236	3.35724	-2.34202	5.54435	2.18703e-07	7.37795e-09
5237	0.995165	-3.18369	4.34886	1.89323e-13	4.77117e-16
5238	0.568294	-4.81712	5.29115	1.68573e-11	1.354e-13
5240	0.0398331	-1.63762	1.573	0.00401969	0.00204697
5242	3.60734	-1.04487	4.70603	2.06859e-05	2.71935e-06
5243	2.74529	-1.8435	4.5188	2.55611e-07	1.0334e-08
5244	2.68392	-1.06371	3.60115	3.73136e-12	2.06342e-14
5246	2.03913	-1.85312	4.24731	2.06859e-05	2.71935e-06
5247	0.664454	-2.80958	3.97714	8.59207e-06	8.53456e-07
5248	3.15152	-3.08742	6.14087	0.000344513	0.000107735
5249	1.59552	-4.16809	5.53115	8.48633e-05	1.71999e-05
5250	-0.302715	-2.82948	3.06456	0.000344513	0.000107735
5269	-4.32639	-2.92797	-1.45495	0.00946662	0.0056438
5272	3.1156	-3.36005	6.51896	0.00744741	0.00423117
5273	3.03319	-1.17655	3.90084	2.06859e-05	2.71935e-06
5274	-1.77725	1.45149	-2.98775	0.00331069	0.00161679
5278	-4.20339	-1.94512	-2.2221	1.98902e-06	1.33134e-07
5283	2.59266	0.13062	2.78567	6.98565e-06	6.63964e-07
5293	-3.8005	1.12161	-5.09931	1.08099e-06	6.65668e-08
5299	-3.84674	-1.87696	-2.11487	6.72633e-05	1.07376e-05
5305	0.583798	-4.24607	4.7865	0.000857672	0.000313217
5308	-0.750935	2.37572	-2.52926	0.000595288	0.000205683
5325	2.19957	-2.72383	5.04963	5.6838e-08	1.59786e-09
5326	1.86133	-1.66384	4.19289	8.48633e-05	1.71999e-05
5327	3.27375	-2.93104	5.82316	9.20239e-11	8.86977e-13
5336	-3.25963	-0.975655	-2.11543	0.000375055	0.000120319
5344	-3.87406	-0.048042	-3.7933	8.75863e-08	2.64987e-09
5345	-3.9993	-0.920176	-3.00689	2.55611e-07	1.0334e-08
5346	2.71479	0.195012	2.10872	0.00812167	0.00474036
5348	-3.40306	1.72518	-4.15714	7.83851e-05	1.28018e-05
5352	-3.28599	0.153419	-3.43941	0.00072333	0.000261057
5383	3.49166	-0.196501	3.79367	0.00175526	0.000754148
5408	-4.08757	-1.98748	-2.28526	0.000771773	0.000280607
5421	2.955	-3.30776	6.31488	8.48633e-05	1.71999e-05
5429	-3.02601	-0.958492	-2.7644	0.00946662	0.00564155
5430	-1.32762	1.47712	-2.50751	0.000304294	7.56864e-05
5440	-3.72882	-2.07926	-1.77058	0.0020837	0.000919953
5457	-4.19713	-0.918502	-3.33915	3.87536e-07	1.64975e-08
5471	2.76234	-0.0884567	3.04688	0.000344513	0.000107735
5474	3.07593	-0.181063	3.52797	0.000151871	3.3588e-05
5484	3.93732	-3.94967	7.86345	8.48633e-05	1.71999e-05
5486	-0.611736	-3.699	3.04556	0.000322778	8.15804e-05
5487	3.46446	-2.50349	5.80443	8.48633e-05	1.71999e-05
5488	3.18554	-2.87131	6.33182	0.000344513	0.000107735
5490	-1.69181	-4.21381	2.3233	0.00201813	0.000886142
5493	1.26542	-3.28758	3.22317	0.00177728	0.000768964
5495	-3.51344	-1.34005	-2.20083	0.00544078	0.00290175
5497	-2.82719	2.37682	-5.10746	4.62243e-07	2.06679e-08
5502	-2.57833	2.43925	-4.54988	0.00332139	0.0016309
5503	-0.0550991	2.94604	-2.85784	0.00110018	0.000430942
5522	-3.6951	-0.855606	-2.92361	0.000344513	0.000107735
5524	-3.17856	1.88347	-5.26817	8.48633e-05	1.71999e-05
5525	-3.33603	2.47346	-5.14483	2.06859e-05	2.71935e-06
5531	-3.07654	0.075352	-3.2596	0.00587433	0.00323206
5546	-1.79054	1.61014	-3.22566	0.00812167	0.00474036
5566	2.29379	-0.85278	3.12249	0.000344513	0.000107735
5574	2.97968	-2.05073	5.09097	0.000344513	0.000107735
5576	1.23876	-4.16446	5.30716	4.37735e-07	1.91743e-08
5577	1.6081	-2.03813	3.49073	0.000344513	0.000107735
5578	1.64823	-1.64762	3.29537	6.72633e-05	1.08774e-05
5582	-4.58619	-1.75515	-2.80843	8.48633e-05	1.71999e-05
5587	-0.444992	-3.71276	2.3213	0.00217705	0.000976905
5588	-1.71656	1.85342	-2.74347	0.000720666	0.000258575
5592	-2.74992	-0.207592	-2.516	0.00948744	0.005695
5593	-4.18089	1.02158	-4.65838	0.000344513	0.000107735
5609	-1.73846	2.27788	-3.8506	0.000344513	0.000107735
5638	-3.69288	-1.65992	-2.07043	0.00175526	0.000754148
5646	1.77832	-1.82076	3.15156	0.00587433	0.00323206
5651	-0.627257	1.73767	-2.50864	0.00175526	0.000754148
5653	-4.24141	-1.97132	-2.26392	0.000633424	0.000225387
5658	1.9344	-2.05099	3.67673	0.00946662	0.00566984
5681	-2.66748	2.69101	-5.16473	2.18703e-07	7.37795e-09
5687	-2.59603	1.17316	-3.67174	0.00271733	0.00129282
5700	-0.693621	2.90317	-3.01488	0.00755477	0.00430227
5703	2.57817	0.0718777	2.32145	0.00587433	0.00323206
5706	-3.35986	-0.312287	-2.90271	0.000344513	0.000107735
5719	-0.105826	2.29462	-2.32808	8.12981e-05	1.343e-05
5721	0.147176	2.49015	-2.22934	0.000595288	0.000205683
5728	-0.351595	2.63795	-2.87752	0.000606012	0.000215471
5742	-0.908818	2.73716	-3.53823	0.000344513	0.000107735
5747	-3.09068	-4.3538	1.50036	0.00183528	0.000798973
5756	-2.09251	-4.31477	2.17289	0.000145944	3.13565e-05
5761	0.00690442	-3.15982	3.3704	4.75335e-06	4.13285e-07
5765	0.367531	-3.59545	3.96298	0.000344513	0.000107735
5766	-2.67292	2.66197	-4.87995	0.000221052	5.16676e-05
5771	-1.74051	-3.71582	2.33271	2.7672e-06	1.93371e-07
5774	-3.2799	2.5192	-6.10183	0.00812167	0.00474036
5780	0.532297	-3.70027	4.05204	0.000344513	0.000107735
5800	-1.12106	2.48428	-3.54445	2.06859e-05	2.71935e-06
5803	3.57048	2.10876	1.40024	0.00106249	0.000403661
5812	-1.70142	2.79708	-4.36807	5.30346e-05	8.10783e-06
5819	2.94565	-3.82696	6.52187	2.55611e-07	1.0334e-08
5826	-1.3759	-3.92626	2.56758	1.08099e-06	5.98938e-08
5827	-1.02812	-4.28354	2.86454	0.00146213	0.000601687
5828	0.37675	2.13211	-1.92544	0.00175526	0.000754148
5829	-0.283569	2.5594	-2.84297	0.000344513	0.000107735
5834	1.86664	3.39131	-1.6248	0.00544078	0.00290175
5842	0.320307	-3.45859	3.61431	0.00175526	0.000754148
5848	-1.10619	2.59799	-3.84172	0.000221052	5.16676e-05
5851	3.01119	-1.55685	4.37809	0.00110018	0.000430942
5857	-2.0986	-4.49941	2.40081	0.00146213	0.000601687
5861	-4.38352	-2.26916	-2.5046	5.54706e-07	2.58417e-08
5867	1.7222	-0.736441	2.56079	7.09222e-07	3.4749e-08
5881	-2.29188	0.0727052	-2.29689	0.00587433	0.00323206
5883	-3.51402	-0.228282	-3.12993	0.000606012	0.000215471
5884	-4.03384	-0.0786959	-3.95514	8.48633e-05	1.71999e-05
5887	-4.17171	0.431025	-4.46925	3.02363e-05	4.14484e-06
5909	-3.95953	-1.90369	-1.90495	0.000251493	6.00621e-05
5911	0.19121	-4.10128	4.09313	8.48633e-05	1.57283e-05
5912	1.78654	-2.45882	4.2052	0.000344513	9.83191e-05
5915	2.61747	-3.67442	5.7724	4.75335e-06	4.26728e-07
5916	0.106441	-4.20008	3.86424	6.16781e-08	1.78346e-09
5919	1.07077	-3.26072	4.25935	0.0024795	0.00113519
5929	-3.2416	1.5106	-4.55979	1.08099e-06	6.65668e-08
5934	1.38541	-2.90913	4.1464	4.05491e-06	3.10019e-07
5942	-1.68227	1.36291	-3.1495	0.000389113	0.000126787
5943	-3.45322	-0.831699	-2.38725	0.0021193	0.000938312
5952	-3.11669	1.69782	-4.37797	8.48633e-05	1.71999e-05
5967	-3.94774	-1.91317	-2.00511	2.06859e-05	2.71935e-06
5986	-3.86138	0.466432	-3.81865	9.19758e-05	1.90354e-05
5991	-4.09401	-1.25063	-2.83397	9.93088e-06	1.00239e-06
6002	2.81744	-1.47323	3.8982	8.48633e-05	1.71999e-05
6004	1.63694	-3.4544	5.21837	1.22623e-08	2.46232e-10
6005	2.8707	-2.02964	4.75987	8.48633e-05	1.71999e-05
6006	2.85728	-0.664666	3.30967	0.00110018	0.000430942
6007	2.78717	-1.92447	4.35663	6.72633e-05	1.08774e-05
6009	3.18824	-1.36626	4.49124	0.00271733	0.00129282
6010	1.59707	-3.30992	5.04057	2.06859e-05	2.71935e-06
6025	-2.82753	1.18139	-3.96819	0.000344513	0.000107735
6032	1.79479	-2.51341	4.37834	6.91428e-12	4.62803e-14
6048	-3.34579	-0.733673	-2.27283	0.000595288	0.000205683
6050	3.34339	-0.111692	3.31396	0.00106249	0.000403661
6055	-2.92297	-0.174077	-2.52339	0.000151871	3.3296e-05
6058	-1.94109	2.98093	-4.49286	0.00335619	0.00165608
6064	1.76253	-4.00405	5.80063	1.42933e-06	9.18445e-08
6067	-3.24608	-0.364837	-2.42787	0.000595288	0.000206398
6078	-3.48128	-0.0987628	-3.00907	0.000149915	3.26322e-05
6086	-1.95995	-3.81599	1.50928	0.00297179	0.00142503
6087	-1.01188	-2.51462	1.6488	0.00577344	0.00311318
6099	3.0508	-1.36773	4.1647	8.48633e-05	1.71999e-05
6100	3.33296	0.0326574	3.231	4.75335e-06	4.26728e-07
6117	-4.82076	-1.76808	-2.79334	8.19568e-05	1.36006e-05
6135	-4.44998	-2.25971	-2.31421	0.00110018	0.000430942
6139	-0.366381	-1.70815	1.44857	0.00367985	0.00182564
6157	-3.379	1.73929	-4.75333	8.23452e-06	8.06917e-07
6167	-3.94066	0.468281	-4.71671	1.89323e-13	5.06889e-16
6181	-0.0993731	2.64367	-2.00246	0.00946662	0.00564155
6182	-0.556829	-3.31916	2.34886	0.00445188	0.00231603
6183	2.14334	3.94425	-1.99813	9.24257e-05	1.92028e-05
6185	-3.60899	-2.0716	-1.59362	0.000306374	7.62859e-05
6193	0.673429	-2.7494	3.25243	1.21909e-05	1.26642e-06
6201	-3.75211	-0.969777	-2.63135	0.00367985	0.00182564
6207	-2.00645	3.19197	-5.10398	3.6886e-05	5.30328e-06
6233	-3.76293	-2.08361	-2.12377	0.001447	0.000591974
6236	-3.6174	-0.982845	-2.1185	0.00949078	0.00570463
6269	2.06896	-2.71749	4.79279	2.06859e-05	2.71935e-06
6270	1.73851	-3.39229	5.25425	1.08099e-06	6.65668e-08
6272	0.737393	-3.37959	4.13806	0.000344513	0.000107735
6273	0.214514	-2.82792	3.15113	0.0027073	0.00125906
6277	3.49062	-1.28733	4.00911	0.00271733	0.00129282
6278	-0.425547	-2.97249	2.04958	0.00338104	0.00166925
6279	-4.04864	-2.78689	-1.58803	0.00216601	0.00096731
6282	0.325129	-1.89114	2.48832	0.000857672	0.000313217
6283	-3.30529	-1.40565	-1.89499	5.99927e-08	1.7026e-09
6287	-1.34829	-3.62279	2.75518	0.00452729	0.00236365
6304	-3.24005	-0.497964	-2.6601	1.28231e-05	1.33553e-06
6311	3.65264	-3.19462	5.95632	0.000344513	0.000107735
6353	-2.73311	0.420316	-2.78405	0.00064934	0.000231398
6355	2.34662	-0.84847	3.18264	0.000565951	0.000190165
6356	3.14847	0.675377	2.33517	0.000543967	0.000182196
6361	2.28118	-3.211	4.88783	0.000322778	8.15804e-05
6364	2.46593	-1.07964	2.47333	0.00101124	0.000382025
6366	2.52722	0.0196705	2.38492	5.05927e-06	4.65967e-07
6368	1.71469	-0.555312	2.40544	3.61549e-05	5.06351e-06
6371	2.17103	-2.04334	3.44823	7.87243e-05	1.2914e-05
6372	2.22016	-2.65844	4.08054	0.000543967	0.000182196
6373	0.269186	-2.97118	3.25424	0.000151871	3.43997e-05
6374	1.73003	-2.84008	4.44792	6.32505e-06	5.94402e-07
6375	2.83624	-2.88197	5.51135	3.29486e-08	8.11584e-10
6390	0.900343	-1.91626	3.07628	0.000359154	0.000113083
6391	2.4401	0.224726	2.21537	0.000180609	4.13926e-05
6392	2.28368	-2.27301	4.04772	1.80601e-05	1.997e-06
6393	2.95552	1.70922	1.42852	0.00478831	0.00250505
6396	-3.89225	-2.31442	-1.66485	0.00032408	8.29507e-05
6397	-3.97027	2.86809	-6.78239	4.75335e-06	4.26728e-07
6407	-4.86177	-1.37644	-3.56321	4.75335e-06	4.26728e-07
6411	-3.36872	0.822462	-3.68286	0.00173315	0.000725744
6413	-3.36598	-0.968189	-2.25509	0.000344513	0.000107735
6418	-3.38389	-1.38283	-2.29029	0.00298629	0.00143506
6422	-3.77704	-2.36364	-1.54712	0.00175526	0.000754148
6423	-0.560739	-3.55783	2.42055	0.00591652	0.00325844
6442	1.30451	2.94499	-1.58177	0.000151871	3.43997e-05
6451	4.71791	1.34223	3.36218	3.70685e-05	5.43869e-06
6481	-2.49753	-0.314308	-2.19144	0.000606012	0.000215471
6491	2.55129	0.37584	2.16176	0.00331069	0.00161679
6497	-0.798967	-3.96709	2.98974	0.00638759	0.00356234
6499	-1.59888	2.48947	-4.27591	0.000344513	0.000107735
6526	-0.515358	2.39063	-2.79847	0.00401969	0.00204697
6528	0.0263093	-3.69359	3.7199	5.30346e-05	8.10783e-06
6545	-1.07899	-3.71806	2.30747	0.00239315	0.00107772
6553	-2.6713	1.73748	-3.65328	0.000565951	0.000190165
6555	-3.66964	-1.95485	-2.4486	0.00279898	0.00133691
6556	1.99032	-3.18678	4.86753	2.82349e-05	3.84781e-06
6557	1.3245	-2.87079	4.41054	3.63482e-05	5.17731e-06
6558	-0.317696	-3.44654	2.32265	0.00537467	0.0028521
6571	0.698885	2.75515	-2.04797	0.00271733	0.00129282
6572	0.436715	3.51927	-3.08993	0.00127127	0.000515996
6579	2.93031	-2.09343	4.55455	0.000344513	0.000107735
6581	2.85653	-2.26312	5.17147	1.08099e-06	6.65668e-08
6592	0.384431	-4.1408	4.31791	2.17316e-06	1.46041e-07
6602	-4.64244	-2.64286	-2.16935	8.48633e-05	1.63971e-05
6625	-3.4298	2.61642	-5.53906	0.00401969	0.00204697
6629	-0.200236	2.47745	-2.60121	0.00106808	0.000406641
6674	-2.06673	2.63227	-4.39188	0.000278705	6.87994e-05
6686	-3.9394	-0.572322	-2.68947	1.13571e-05	1.1646e-06
6693	-0.941049	1.77438	-2.8597	0.0021193	0.000943613
6708	0.180268	-2.81817	2.26878	0.00638759	0.00356234
6717	0.191133	1.86583	-1.66362	0.00755477	0.00430227
6736	3.05369	-0.386573	3.46198	0.00587433	0.00323206
6737	-4.4625	-0.65319	-3.96241	2.06859e-05	2.71935e-06
6748	3.22591	0.915139	2.25578	0.00127993	0.00052054
6751	0.973621	3.1262	-2.0034	4.32977e-05	6.43877e-06
6772	-1.48689	1.05554	-2.416	0.000606012	0.000215471
6798	-4.33121	-0.683586	-3.78948	0.000344513	0.000107735
6831	0.157841	-3.77047	3.92831	0.00177899	0.000773994
6832	3.12271	-3.03836	5.37306	0.000344513	0.000107735
6833	2.68313	-3.36879	6.34169	4.75335e-06	4.26728e-07
6834	-1.46801	-4.25646	2.77893	0.00271733	0.00129282
6835	3.08554	-3.05815	6.11445	8.25243e-12	5.96561e-14
6837	3.16285	-0.564204	3.84659	0.000192357	4.43426e-05
6838	1.02993	-2.32879	2.8911	0.0042881	0.00220203
6841	-3.34246	0.062015	-3.10239	0.0076298	0.00435113
6880	-3.05316	1.48637	-4.01003	0.00544078	0.00290175
6888	-0.397777	-4.03051	3.08028	0.000145944	3.13771e-05
6892	0.956898	-0.229213	1.65467	0.000389113	0.000126787
6904	1.61406	-2.19145	3.77974	0.000149915	3.26322e-05
6906	0.85976	-3.47212	4.03515	0.0024795	0.00113519
6918	-1.35387	0.305951	-2.08268	0.00544078	0.00290175
6925	-4.46083	-2.03976	-2.26517	3.61549e-05	5.06351e-06
6928	-1.43717	-4.01151	2.6069	8.63538e-05	1.75482e-05
6936	-4.16663	-0.773186	-3.29449	2.21549e-05	2.99551e-06
6940	0.628701	3.07981	-2.36002	0.000344513	0.000107735
6949	-1.6984	0.949096	-2.6475	9.19758e-05	1.90354e-05
6962	-4.08016	-2.30421	-1.85619	0.000268482	6.41913e-05
6977	-1.04198	2.08905	-2.94723	0.000543967	0.000182196
6978	2.70574	0.822728	1.86817	0.00271733	0.00129282
6979	1.93993	-0.96604	2.88411	0.00329115	0.00159402
6980	-2.96008	0.521702	-3.69859	0.000982446	0.000369831
6987	-0.307232	-3.58375	3.14801	1.28469e-08	2.64849e-10
6990	1.77982	-1.6393	3.68006	0.000344513	0.000107735
6992	1.34407	-1.84633	2.91356	0.000466328	0.000153195
7006	-0.735142	-4.1369	3.47818	4.75335e-06	3.8683e-07
7013	0.219083	-3.49315	3.05512	0.000466328	0.000153195
7015	1.98083	-3.36892	5.34062	0.000277324	6.66023e-05
7021	3.14578	0.534042	2.63181	8.12981e-05	1.343e-05
7022	3.00209	-2.41066	4.78293	1.81407e-08	3.88555e-10
7025	2.43267	-2.23245	3.8463	1.77701e-05	1.95543e-06
7030	2.29546	-0.301542	1.64258	0.0024795	0.00112943
7035	-0.623783	2.35363	-3.10106	0.000606012	0.000215471
7036	-3.50254	1.40587	-3.77678	0.00638759	0.00356234
7039	3.09087	-1.26533	4.17721	0.000344513	0.000107735
7042	3.61867	-1.37225	5.05072	8.48633e-05	1.71999e-05
7043	1.92761	-0.687891	2.8703	0.00638759	0.00356234
7068	-3.13826	1.52609	-4.46992	2.55611e-07	1.0334e-08
7074	0.207985	2.80656	-2.55779	0.00587433	0.00323206
7075	-4.05646	-0.0287364	-3.50142	9.41842e-05	1.9669e-05
7085	-4.49297	-2.86986	-1.83315	0.00147284	0.000607276
7111	-5.21693	-3.56476	-1.86115	0.00946662	0.00564155
7115	3.50098	-2.84039	6.43401	2.06859e-05	2.71935e-06
7117	3.17095	-0.333031	3.66654	0.000344513	0.000107735
7126	0.453436	2.90548	-2.34965	0.00106249	0.000403661
7138	-0.972001	-4.01036	3.00629	0.00638759	0.00354355
7158	0.133488	-3.08179	3.14047	0.000278705	6.87994e-05
7160	0.214766	-2.94626	3.31456	1.14971e-06	7.19035e-08
7161	0.212605	-4.49876	4.9754	9.93088e-06	1.00239e-06
7165	-2.71121	-1.25831	-2.24794	8.48633e-05	1.71999e-05
7178	-3.20105	1.98222	-5.18327	8.48633e-05	1.71999e-05
7188	0.401752	-3.64386	4.4637	2.55611e-07	1.0334e-08
7212	-3.85817	-1.91713	-2.04265	3.88055e-06	2.87795e-07
7213	-3.78682	-2.24343	-1.76884	0.00544078	0.00290175
7218	-4.3678	0.401498	-4.12556	0.000226649	5.31579e-05
7246	0.50447	1.27687	-1.41247	0.0016787	0.000701591
7248	0.669576	-2.30741	3.05123	0.000880655	0.000326797
7249	-1.93455	-3.6401	2.17298	0.00331069	0.00161679
7250	0.0888479	-4.21387	4.29836	4.05491e-06	3.10019e-07
7251	-0.00835436	-3.76884	3.62662	0.000982446	0.000369831
7252	0.504465	-4.12143	4.57162	0.000344513	0.000107735
7256	-3.9646	-1.24734	-2.84693	0.000149915	3.26322e-05
7260	2.87401	-3.69183	6.46313	1.08099e-06	6.65668e-08
7262	1.99432	-1.26539	3.1968	0.000344513	0.000107735
7270	-3.28136	-0.798536	-2.41999	0.00175526	0.000754148
7305	-4.58379	-1.56321	-2.64483	0.00946662	0.00564155
7306	-0.0474282	-3.97778	4.0309	1.22623e-08	2.46232e-10
7317	1.93672	3.84522	-1.83073	0.00331069	0.00161679
7331	0.0954539	2.94924	-2.5625	0.00110018	0.000430942
7336	-4.81588	-2.78295	-2.03292	0.000753854	0.000272679
7345	-3.43202	-0.916033	-2.2188	0.00677819	0.00378926
7358	0.421063	-3.64824	4.31966	0.000344513	0.000107735
7367	2.73442	-1.60009	4.28076	3.70685e-05	5.43869e-06
7368	0.156911	-2.61648	2.93078	2.55611e-07	1.0334e-08
7381	-1.162	-3.1767	1.93687	0.0016787	0.000701591
7398	-0.00735981	-3.45002	3.33507	0.000590154	0.000199246
7400	-3.95689	-0.0386969	-3.37748	0.000910374	0.000338313
7420	-3.23132	-0.722132	-2.50918	0.00437332	0.00227038
7426	-3.87966	-2.6626	-1.47715	0.00885767	0.00521262
7429	-3.45103	-1.75084	-1.95229	0.00032408	8.25852e-05
7430	-3.93244	-0.224925	-3.57449	1.6585e-05	1.80726e-06
7442	-1.88568	-3.88869	1.95298	0.00949078	0.00570463
7444	-1.86635	1.72479	-3.11837	0.00271733	0.00129282
7448	1.70178	-1.97309	3.80392	8.48633e-05	1.71999e-05
7449	2.60071	-2.21308	4.8936	1.08099e-06	6.65668e-08
7450	1.56547	-3.03555	3.42234	5.93651e-05	9.18689e-06
7452	2.36902	-2.72415	5.11858	4.75335e-06	4.26728e-07
7453	0.643523	-3.32543	3.44535	0.00323916	0.00156451
7461	-2.92111	-0.264669	-2.63901	6.72633e-05	1.08774e-05
7471	0.181682	2.79883	-2.60632	0.00319386	0.00153921
7475	-4.10349	-1.13418	-2.7641	4.05491e-06	3.11582e-07
7482	-3.38685	-1.62711	-1.76728	0.00591652	0.00325844
7504	-3.46174	-1.13991	-2.20655	0.000489201	0.000161757
7506	-3.15261	1.2871	-4.17363	2.06859e-05	2.71935e-06
7517	2.84897	-0.483863	2.28932	0.00332139	0.0016309
7523	0.796527	2.59082	-1.61048	0.000595288	0.000206398
7547	-0.110731	1.77312	-1.79252	0.00110018	0.000430942
7572	-2.90203	1.71491	-4.51743	9.59662e-08	2.95478e-09
7573	-2.15049	-3.75181	1.71488	0.00331389	0.0016219
7578	-0.711331	3.10665	-3.81323	0.000344513	0.000107735
7580	-2.75463	1.9434	-4.07199	0.00946662	0.00564155
7590	-2.83153	0.812426	-3.80775	0.000344513	0.000107735
7626	2.31293	-0.590407	1.93067	0.00298629	0.00143518
7639	-1.80504	2.64684	-4.38204	0.000344513	0.000107735
7647	-1.33971	2.73945	-3.83742	0.000106032	2.23703e-05
7650	-3.11142	2.12279	-5.41041	2.06859e-05	2.71935e-06
7654	0.0201527	3.09994	-2.85726	0.000344513	0.000107735
7662	-1.48976	1.34401	-2.92373	0.00110018	0.000430942
7668	-1.24567	2.77093	-4.06021	4.75335e-06	4.26728e-07
7670	2.41836	-1.283	3.58867	0.000344513	0.000107735
7681	-0.0525332	2.32955	-2.36118	9.70856e-05	2.03269e-05
7693	-1.47867	2.91778	-4.17225	4.33712e-05	6.49117e-06
7733	-3.65041	-1.31173	-2.45413	0.00246685	0.00111619
7737	-3.08551	-0.191811	-3.64544	0.000180609	4.13926e-05
7744	-0.73612	-3.58304	2.83436	0.00110018	0.000430942
7747	-1.26685	-4.11489	2.76462	0.000880655	0.000326797
7751	-1.67538	-4.02252	2.35145	0.000294454	7.30024e-05
7752	2.09678	-3.28552	4.86517	1.57028e-05	1.70691e-06
7753	2.39696	-3.14747	5.28933	8.48633e-05	1.71999e-05
7757	2.69213	-1.31464	3.56213	0.000344513	0.000107735
7758	3.09281	-0.486017	3.61311	0.000344513	0.000107735
7760	-0.640157	-3.83986	3.08593	0.0024795	0.00113519
7783	3.04215	-0.124344	3.16649	0.00331069	0.00161679
7785	0.403905	-3.25489	3.13928	0.00110018	0.000430942
7786	-1.71832	-3.37241	1.53132	0.00175526	0.000754148
7793	-0.770473	-3.57093	2.59367	0.00110018	0.000430942
7798	0.0424848	-3.82443	3.60443	2.06859e-05	2.71935e-06
7799	-0.604824	-3.61795	2.89785	2.27917e-13	6.7124e-16
7800	-1.79789	-3.89087	2.21261	8.02773e-06	7.75906e-07
7801	2.52944	-3.67731	5.77523	1.22623e-08	2.46232e-10
7802	0.324363	-2.2451	3.24355	4.42664e-12	2.84443e-14
7803	3.55424	-1.74656	5.19937	2.06859e-05	2.71935e-06
7804	2.67483	-1.05258	3.38613	2.46257e-12	1.05492e-14
7808	2.98669	-1.58334	4.68376	4.75335e-06	4.26728e-07
7809	0.88204	-2.76868	3.70018	4.10027e-14	4.39119e-17
7810	2.145	-2.97144	4.94483	8.23178e-14	1.32237e-16
7811	0.621408	-4.02644	4.53445	0.000344513	0.000107735
7812	1.02055	-1.45738	3.3793	6.75305e-07	3.27256e-08
7814	1.11796	-3.40946	4.19155	3.00101e-08	7.23135e-10
7815	3.29284	-3.51972	6.45598	2.27018e-06	1.54992e-07
7816	-0.378026	-3.81888	3.53865	9.81737e-13	3.41702e-15
7819	0.526857	-2.71485	3.24171	0.00110018	0.000430942
7826	-3.68455	-1.46929	-2.57284	8.48633e-05	1.71999e-05
7842	0.325758	2.47229	-2.21961	0.000344513	0.000107735
7845	-4.53758	-1.25992	-2.92451	0.000344513	9.83191e-05
7859	-4.88964	-2.9109	-2.05043	0.000880655	0.000326797
7867	0.0754628	-4.35025	4.44428	5.6838e-08	1.59786e-09
7868	0.207041	-3.66352	3.84492	0.000344513	0.000107735
7874	-3.48695	2.36026	-5.8472	8.48633e-05	1.71999e-05
7880	-4.45599	-1.45802	-3.29514	0.000344513	0.000107735
7884	-2.93914	2.20194	-5.17079	0.000344513	0.000107735
7892	1.59401	-3.36451	4.39205	0.00266749	0.00122983
7898	0.818113	2.27346	-1.41532	0.0021193	0.000938312
7908	-3.03014	2.37215	-3.67098	0.00146213	0.000601687
7951	0.136034	-3.76175	3.67387	0.00175526	0.000754148
7952	-1.62481	1.54176	-3.01757	0.00271733	0.00129282
7953	-0.913461	1.85214	-2.98181	0.0016787	0.000701591
7965	1.97719	3.21498	-2.06957	0.00884009	0.00519755
7970	3.0674	0.659852	2.40755	0.00744741	0.00423117
7983	-3.56844	1.47456	-4.96499	3.62489e-06	2.66267e-07
7991	-1.54161	1.73327	-2.98989	0.0016787	0.000701591
7992	-3.97921	0.660842	-4.55631	0.00744741	0.00423117
8035	-2.89972	0.213669	-3.60175	0.00744741	0.00423117
8038	-4.28661	-0.0157039	-4.30806	2.06859e-05	2.71935e-06
8043	-3.06394	-0.546754	-2.75099	0.000344513	0.000107735
8060	-4.53662	-1.66571	-2.75774	0.00812167	0.00474036
8063	-4.15051	1.42144	-4.20156	0.00677819	0.00378926
8067	-4.14478	-2.33165	-1.68124	6.48955e-09	1.0425e-10
8070	-3.36991	-0.00398142	-3.06015	0.00437332	0.00227038
8082	-4.59157	-2.1467	-2.3144	6.86501e-06	6.50659e-07
8083	-4.13218	-1.15728	-3.10009	9.24257e-05	1.92028e-05
8084	0.286309	-3.25511	3.50695	0.000115041	2.43634e-05
8085	-0.641893	-3.86625	2.78316	0.0024795	0.00112943
8091	-1.88516	2.42059	-3.77774	0.000151871	3.43997e-05
8101	-4.63532	-1.84917	-2.97022	1.05453e-06	5.39265e-08
8102	-4.03434	1.2163	-5.3808	1.08099e-06	6.65668e-08
8112	-4.00119	-0.994419	-2.6204	0.00884009	0.00519755
8114	-1.90032	1.21708	-2.81863	0.00216601	0.00096731
8120	3.17679	1.14086	1.91813	5.31999e-05	8.14734e-06
8131	0.305328	-2.97176	2.88942	8.48633e-05	1.53059e-05
8132	-1.31562	-4.47491	2.69239	0.00587433	0.00323206
8139	0.809099	-2.83697	3.79976	0.000323142	8.19318e-05
8148	2.40949	-0.28424	2.90804	0.00577344	0.00311318
8175	0.567542	2.71119	-1.73674	0.000341637	8.7536e-05
8189	-2.54166	0.866466	-3.33248	0.000344513	0.000107735
8197	-3.64584	1.17593	-4.91849	8.48633e-05	1.71999e-05
8211	-2.30111	2.68756	-5.08914	8.48633e-05	1.71999e-05
8238	-3.39584	1.94515	-5.00892	0.000375055	0.000120399
8246	-3.97517	0.471601	-4.44677	8.48633e-05	1.71999e-05
8252	0.478778	-1.55354	2.19867	0.00359812	0.00178028
8253	-1.17202	-3.91901	2.93702	0.000421749	0.00013776
8285	-3.86377	-2.1134	-2.29763	0.000221052	5.16676e-05
8292	2.65423	-1.62637	4.10185	0.00895136	0.00528693
8294	0.220439	-1.80127	2.09009	5.24165e-06	4.84168e-07
8312	-4.07471	0.261923	-3.16931	0.0001757	3.98913e-05
8329	-4.04132	-2.1903	-1.60264	0.00505147	0.00264407
8366	0.548882	2.27029	-1.57989	0.00236088	0.00106256
8367	-1.13993	-3.47085	2.62741	0.000344513	0.000102823
8375	3.21298	1.10508	1.91819	9.35194e-06	9.33942e-07
8378	-1.2686	-3.27121	2.20046	0.0001325	2.82029e-05
8393	-3.95411	2.52546	-6.26549	5.6838e-08	1.59786e-09
8401	2.83851	0.383413	2.3116	0.00421431	0.00216188
8402	-2.95374	2.86583	-5.59884	0.00013365	2.85908e-05
8404	-1.48791	-3.8871	1.97658	0.00644594	0.00359661
8437	-1.15352	1.47488	-2.73844	0.000595288	0.000206398
8448	-4.05231	-1.85804	-2.54149	8.48633e-05	1.71999e-05
8473	1.51173	0.291158	1.42308	0.00116283	0.000457662
8478	0.0652847	1.9782	-2.06937	0.00331389	0.0016219
8480	-4.0161	-1.07525	-2.90066	2.40884e-06	1.67684e-07
8484	2.55839	0.0230936	2.94971	0.000344513	0.000107735
8485	-3.33895	1.83534	-5.02201	4.32977e-05	6.45698e-06
8487	2.60859	0.218376	2.26997	0.00110018	0.000430942
8516	1.98595	3.33503	-1.61562	0.00587433	0.00323206
8525	-5.1433	-1.20878	-3.69252	1.00302e-07	3.19571e-09
8528	3.05235	-0.46801	3.39619	0.000344513	0.000107735
8533	-2.60908	-3.95806	1.64897	0.0053309	0.00282316
8538	0.27948	-2.02076	2.36928	0.00677819	0.00378926
8549	0.709447	2.66749	-1.80604	0.00117838	0.000465987
8550	1.39419	-3.19236	4.38412	8.23905e-07	4.13358e-08
8558	-2.17277	-3.1588	1.40328	0.00744741	0.00423117
8565	1.96168	3.11092	-1.52448	0.00587433	0.00323206
8571	-4.09617	0.978985	-4.53292	0.00421431	0.00216188
8574	0.740843	3.63141	-2.61395	0.000606012	0.000215471
8586	0.0344538	2.45033	-3.15743	0.00577344	0.00311318
8615	-1.51629	-4.4913	3.10376	0.00895136	0.00528693
8617	2.46181	-3.01265	5.25528	0.000344513	0.000107735
8618	-1.84197	-4.12916	2.2872	0.00382827	0.0019126
8619	2.70342	-0.143033	2.9795	0.000606012	0.000215471
8628	-3.34996	-0.889885	-1.96761	0.00323916	0.00156451
8641	3.3488	0.761202	2.30561	9.81276e-14	1.83907e-16
8647	3.23061	-3.03446	6.38284	6.72633e-05	1.08774e-05
8652	-3.50656	-0.792616	-2.44945	0.00127127	0.000515996
8655	2.33445	-2.26999	3.81347	0.000237672	5.58067e-05
8656	2.5779	-2.29801	4.66387	0.0078253	0.00446891
8665	0.631973	-4.72792	5.24657	2.21549e-05	2.94668e-06
8672	0.0952233	2.08128	-2.2973	0.00437332	0.00227038
8673	0.258152	-2.51282	3.14504	0.00297179	0.00142503
8676	0.49687	-3.49713	4.31498	1.1216e-10	1.17114e-12
8677	-0.212661	-2.59581	2.33481	3.9209e-06	2.94392e-07
8687	1.87167	-3.21709	4.16269	0.00388252	0.00194282
8688	1.50507	-1.78738	3.37322	0.00577344	0.00311318
8696	-3.94542	-1.12787	-2.47827	0.00946662	0.00566984
8743	-0.929574	-4.40778	3.26223	7.4084e-05	1.20597e-05
8753	-1.22541	2.58988	-2.65696	0.00100522	0.000378942
8761	-4.08788	-1.78701	-2.32155	0.00127127	0.000515996
8762	1.89635	-0.0404932	2.58211	0.00166624	0.000691032
8768	-3.97951	-0.940914	-2.91927	0.00587433	0.00323206
8770	-3.94784	-0.468905	-3.78651	0.000344513	0.000107735
8780	-1.7098	-3.40769	1.57932	0.00332139	0.0016309
8781	-0.241669	-3.85789	3.23686	8.36574e-06	8.22015e-07
8789	-3.19452	1.31388	-3.48099	0.00744741	0.00423117
8797	1.28137	-3.22564	4.50848	0.000344513	0.000107735
8800	2.98935	-3.32876	6.40344	2.06859e-05	2.71935e-06
8806	1.83795	-2.34187	4.07344	1.21909e-05	1.26477e-06
8807	0.768005	-4.01245	4.73813	1.97289e-07	6.39142e-09
8811	0.87843	-1.2131	2.75789	0.0024795	0.00113519
8812	1.49071	-2.79231	4.56849	2.06859e-05	2.71935e-06
8816	2.96662	-2.41221	5.49531	1.57028e-05	1.70691e-06
8821	0.582023	-2.92238	3.30293	5.50095e-06	5.11066e-07
8826	-3.58172	3.06006	-6.52769	4.75335e-06	4.26728e-07
8831	-2.22296	-3.22299	1.55905	0.00246685	0.00111619
8832	-3.84791	-1.58961	-2.34427	0.000982446	0.000369831
8846	-0.583842	2.09492	-2.63326	0.000278705	6.87994e-05
8850	-0.133393	-2.90834	2.81321	7.87243e-05	1.29416e-05
8859	-1.4527	-3.42557	1.59351	0.00857273	0.00502658
8860	-1.12764	-3.99769	2.54288	0.000375055	0.000120399
8873	2.59632	0.28753	2.65551	0.000595288	0.000206398
8875	3.02882	-2.53222	5.09392	1.7959e-08	3.75048e-10
8882	0.0428132	2.51904	-2.34161	0.000590154	0.000199246
8887	0.947673	2.96734	-2.26609	0.000128886	2.7399e-05
8889	0.698226	2.45799	-1.86085	0.00784331	0.00450868
8891	-4.70342	-2.66273	-1.67391	3.61549e-05	5.0628e-06
8902	2.44318	-1.34138	3.68096	2.06859e-05	2.71935e-06
8917	-2.36925	0.375546	-2.78357	0.00126259	0.000503346
8918	-3.71531	-0.122627	-3.48609	3.25689e-06	2.34565e-07
8922	-4.04259	-1.77133	-1.94895	0.000178856	4.07035e-05
8927	2.03056	0.410744	1.41716	8.48633e-05	1.52868e-05
8935	0.447461	2.11613	-1.44219	0.00175526	0.000749056
8939	-0.556208	1.49154	-2.03505	0.000375055	0.000120399
8949	-3.98185	-2.37551	-1.5984	2.33656e-06	1.60775e-07
8950	-3.37404	-1.29784	-1.65129	0.00931851	0.00550877
8957	-1.15971	1.02873	-2.76212	4.27822e-07	1.85561e-08
8960	-3.81953	-0.975826	-2.72516	2.09835e-05	2.76409e-06
8965	-3.48724	-1.87036	-1.50945	0.00323916	0.00156451
8987	-2.13366	2.01072	-3.86154	7.35037e-09	1.20046e-10
8998	0.982711	-2.49817	2.35528	6.07756e-05	9.47025e-06
8999	-3.65037	2.46508	-5.91905	0.000344513	0.000107735
9000	-1.8328	0.488208	-2.38686	0.00271733	0.00129282
9004	-2.38392	1.77408	-3.86495	0.00744741	0.00423117
9005	-0.106003	2.69843	-2.80443	0.00577344	0.00311318
9011	-2.97809	-0.594842	-1.98223	0.000102896	2.1626e-05
9019	-2.94171	-0.418713	-2.61272	0.00437332	0.00227038
9051	-0.0798118	1.95352	-2.07234	2.27018e-06	1.54992e-07
9056	-2.13224	2.633	-4.45414	1.08099e-06	6.65668e-08
9072	-3.03518	-0.761284	-1.43817	0.00350709	0.00173242
9073	1.85452	-2.54236	4.20779	2.02763e-08	4.50585e-10
9098	-4.02717	-2.1978	-1.7471	8.92018e-09	1.48073e-10
9099	-3.88845	-2.00623	-1.96595	0.000359154	0.000113083
9130	-0.757044	1.77094	-2.21291	0.00222819	0.00100045
9137	-0.65454	2.02409	-2.09579	0.00740355	0.00415868
9143	-0.409014	2.38054	-2.57377	0.00437332	0.00227038
9146	-3.52125	-0.916213	-2.12713	0.00319386	0.00153921
9147	-1.69755	2.15989	-3.75434	2.55611e-07	1.0334e-08
9153	2.375	-0.0706015	2.5208	2.03064e-05	2.26714e-06
9174	-0.391674	2.14557	-2.33112	0.00109218	0.000416109
9176	-4.04593	-1.84509	-2.20537	0.00587433	0.00323206
9179	-1.49091	0.900867	-2.21274	0.00382827	0.0019126
9185	0.733529	2.63869	-1.93918	1.0102e-06	5.13889e-08
9202	-1.63339	1.88151	-2.83002	0.0051389	0.00269259
9210	0.624559	2.4515	-1.5559	3.42354e-05	4.72971e-06
9217	-3.32453	-0.316565	-2.55796	0.00129626	0.000527527
9271	1.85111	-0.818769	2.64266	0.0027073	0.00125906
9283	-3.80166	-0.0706193	-3.43983	0.00401969	0.00204697
9298	1.32329	3.31916	-1.57846	0.00462329	0.00241501
9304	1.01595	-4.2002	4.99735	0.00106249	0.000403661
9316	-3.46814	-0.662436	-2.24142	0.00184189	0.000802345
9335	-3.26333	-0.354431	-3.17203	8.48633e-05	1.71999e-05
9339	-4.86528	1.71912	-6.45347	8.48633e-05	1.71999e-05
9342	-4.81495	-2.18703	-2.93233	0.00072333	0.000261057
9356	-0.481879	2.07007	-2.2565	0.0024795	0.00113519
9361	2.80234	-2.43179	5.17379	0.00110018	0.000430942
9364	3.72991	1.30666	2.42553	0.00587433	0.00323206
9387	-4.05539	-2.31206	-1.66217	5.09288e-05	7.66318e-06
9402	-0.0161654	-2.93566	2.37428	0.00416248	0.00212414
9407	-3.84556	2.15015	-5.62292	8.48633e-05	1.71999e-05
9427	-2.53852	0.45649	-2.56698	0.00685761	0.00384283
9436	-3.10426	-0.260408	-2.51684	0.00177728	0.000768964
9441	0.774124	2.19346	-1.84604	0.00331069	0.00161679
9447	-4.03618	-0.415885	-3.65824	6.37033e-07	3.03593e-08
9450	-2.7738	1.18471	-3.89415	0.000226649	5.31579e-05
9455	1.98749	-1.72563	3.71312	8.48633e-05	1.71999e-05
9456	-1.14664	-3.31647	2.12773	0.000151871	3.43997e-05
9457	-0.268916	2.48179	-3.02095	0.00587433	0.00323206
9459	0.738335	2.7244	-1.86717	8.48633e-05	1.71999e-05
9481	-5.33199	-3.38803	-1.80026	0.000221052	5.16676e-05
9483	-0.327923	-2.78757	3.38147	0.00176345	0.000759677
9500	-3.38782	-1.57001	-1.72131	0.00401969	0.00204697
9502	-4.55957	-1.56012	-3.22228	1.98902e-06	1.33134e-07
9510	-4.42497	-0.263994	-3.89826	3.00101e-08	7.13552e-10
9513	-3.77318	-1.14807	-2.4151	4.75335e-06	4.28883e-07
9521	-2.89823	2.11149	-5.00103	8.48633e-05	1.71999e-05
9525	-3.52006	-1.68798	-2.01625	2.06859e-05	2.71935e-06
9542	0.930507	2.69272	-1.76221	0.00744741	0.00423117
9549	1.51014	-4.62671	5.65371	1.22623e-08	2.46232e-10
9550	0.634773	-4.21987	4.04981	1.88776e-06	1.24007e-07
9569	-4.80892	-2.39894	-2.80441	3.61549e-05	5.12074e-06
9572	-5.69709	-3.28818	-2.27966	0.000359154	0.000113083
9574	-3.40898	-1.10531	-2.16152	0.000720666	0.000258745
9607	-0.179675	-3.58704	3.07508	8.48633e-05	1.52355e-05
9612	0.347265	-3.22555	3.3338	7.18339e-06	6.92375e-07
9613	-0.469537	-3.48193	2.47282	8.59207e-06	8.53456e-07
9614	-1.10313	-4.64966	3.48364	0.000595288	0.000206398
9615	-0.409817	-2.9276	2.82815	0.00382827	0.0019126
9622	1.6223	-0.669972	3.10918	0.000151871	3.3296e-05
9624	2.74501	-0.187229	3.05963	0.000880655	0.000323981
9627	-3.04945	0.926174	-3.92614	8.97245e-09	1.51343e-10
9637	-3.11171	1.54004	-4.65175	0.000344513	0.000107735
9647	2.95889	0.352284	2.78941	2.55611e-07	1.0334e-08
9659	0.28681	-3.86357	3.37282	0.00466787	0.00243954
9662	-3.47653	2.67609	-6.12497	0.000344513	0.000107735
9673	-2.50387	1.97569	-3.92626	0.000322778	8.15804e-05
9708	-3.40212	-0.842833	-2.91593	2.56938e-09	3.78356e-11
9726	-4.18498	-2.63366	-1.52976	0.00059258	0.000200383
9733	-0.168855	2.56045	-2.66811	4.75335e-06	4.26728e-07
9769	-0.060248	-2.19794	2.30742	0.00401969	0.00204697
9773	0.529879	-4.42704	4.69799	4.75335e-06	4.26728e-07
9784	2.6627	0.125609	2.29086	0.00127127	0.000511237
9801	1.02892	-2.08911	3.00381	1.18081e-05	1.22033e-06
9824	-2.41135	2.098	-4.10975	0.000344513	0.000107735
9838	-3.45722	2.30901	-5.75105	2.55611e-07	1.0334e-08
9845	-3.37094	-0.0330908	-2.74397	0.00032408	8.29507e-05
9852	-2.10718	1.92618	-2.24765	0.00522187	0.00274165
9855	-3.94217	-0.628306	-3.27014	0.000151871	3.43997e-05
9867	-3.98181	2.7078	-5.29	0.00437332	0.00227038
9873	-2.62217	2.49917	-5.56936	3.63482e-05	5.17731e-06
9884	-3.06067	0.137073	-3.65925	0.00127127	0.000511237
9911	1.81643	3.12282	-1.48765	0.00812167	0.00474036
9917	-0.86981	-3.99592	3.0665	4.26544e-07	1.83865e-08
9946	-1.93602	2.25055	-4.17563	8.48633e-05	1.71999e-05
9954	0.887885	-3.59393	4.04894	0.0027073	0.00125906
9956	-0.298568	2.40197	-2.75585	0.0016787	0.000701591
9983	-3.52097	1.28274	-4.79535	0.000344513	0.000107735
9990	0.349626	3.03713	-2.71839	0.00217705	0.000976354
9997	-3.93338	0.25485	-3.98905	0.00857273	0.00502658
10002	-3.69452	-0.439501	-3.134	8.48633e-05	1.71999e-05
10004	3.86359	-1.15438	4.76204	0.000344513	0.000107735
10006	3.32891	-3.57215	6.67581	1.68573e-11	1.354e-13
10008	3.08098	0.208769	2.5643	0.00812167	0.00474036
10014	-2.98075	-1.14709	-2.63404	0.00279898	0.00133691
10037	-4.16662	-2.20011	-2.06306	0.000221052	5.16676e-05
10088	-4.46981	-0.783677	-3.73282	4.49355e-05	6.74934e-06
10111	2.54305	-1.80879	3.4631	0.000375055	0.000120399
10114	-2.91991	0.223782	-3.18436	0.000959725	0.000358452
10149	-4.06759	-2.66496	-1.48752	3.6886e-05	5.30328e-06
10156	1.01396	-1.61902	2.41739	0.00517057	0.00271057
10165	-3.44826	-1.90572	-1.578	0.000151871	3.43997e-05
10173	-1.10137	-2.92025	2.11435	0.00271733	0.00129282
10174	-0.188373	-3.38352	3.02958	0.00587433	0.00323206
10186	-4.33329	-2.85678	-1.58409	0.000606012	0.000215471
10194	-4.4026	-2.55483	-1.83809	8.48633e-05	1.71999e-05
10203	-4.36389	-2.75431	-1.67081	0.00382827	0.0019126
10209	-4.96025	-1.05955	-3.78749	7.18339e-06	6.92375e-07
10264	-4.88601	-3.40016	-1.48194	0.00857273	0.00502658
10330	-0.819681	1.23672	-2.0564	0.00117838	0.000465987
10341	-3.05038	-0.734068	-2.03983	0.00638759	0.00356234
10366	-1.41661	3.13583	-4.38038	0.00271733	0.00129282
10427	-1.19796	2.44417	-3.60189	0.000344513	0.000107735
10434	-3.24716	-1.5832	-1.95324	0.000880655	0.000326797
10440	-0.375774	1.60471	-1.8728	0.00271733	0.00129282
10462	-1.994	0.98066	-3.38932	2.06859e-05	2.71935e-06
10469	-4.6135	-0.853013	-3.8317	8.48633e-05	1.71999e-05
10484	3.25664	1.73689	2.76046	8.48633e-05	1.71999e-05
10485	-1.93288	-4.143	3.02243	0.00239889	0.00108094
10493	3.53332	-1.10663	4.77853	8.48633e-05	1.71999e-05
10498	-0.155172	2.30205	-2.57622	0.00812167	0.00474036
10503	1.03836	3.24087	-2.18618	0.000606012	0.000215471
10508	0.165448	1.49443	-1.70969	0.000959725	0.000358452
10516	3.40215	0.809171	2.65911	3.00101e-08	7.18877e-10
10539	-4.02977	-1.83818	-2.13541	0.00110018	0.000427249
10544	-4.54604	-2.1147	-2.64036	1.08099e-06	6.65668e-08
10545	0.360305	2.04426	-1.98777	0.000151871	3.43997e-05
10547	1.99207	0.324505	1.80941	0.00587433	0.00323206
10558	2.00693	-2.79352	4.52504	0.000857672	0.000313217
10566	-0.4043	1.82844	-1.4424	0.0027073	0.00125906
10569	1.75644	-3.65598	5.38204	0.00401969	0.00204697
10572	0.0811644	-3.69818	3.7694	8.23905e-07	4.13358e-08
10583	-4.47264	-2.03033	-2.29732	0.00266749	0.00122983
10589	-0.231893	-3.67288	3.33054	1.04029e-05	1.06397e-06
10591	-3.74979	-2.1494	-1.48272	0.00852478	0.00498934
10594	0.604797	2.43524	-1.56191	0.0027073	0.00125906
10599	-3.73052	-0.205167	-3.40978	2.21549e-05	2.99551e-06
10628	-3.29861	-1.3831	-1.91585	0.000304294	7.56864e-05
10633	1.5228	-2.47571	3.99851	0.000375055	0.000120399
10636	-3.75533	-1.69468	-2.18915	0.000344513	0.000107735
10637	-4.52024	-2.49792	-1.99218	6.72633e-05	1.08774e-05
10647	-0.503451	-3.83125	3.38409	4.49702e-07	1.98664e-08
10648	-2.00833	-4.03661	2.10804	0.00744741	0.00423117
10649	2.06593	-3.58799	4.96723	2.06859e-05	2.71935e-06
10650	0.536789	-2.86257	3.33014	0.00587433	0.00323206
10653	1.07224	2.94504	-1.74697	0.00175526	0.000754148
10655	3.70081	-3.53728	6.10662	3.61549e-05	5.12074e-06
10660	1.93061	-2.86273	4.62547	2.06859e-05	2.71935e-06
10663	0.162756	-4.0462	4.1588	0.000344513	0.000107735
10670	2.09348	-2.69523	4.30585	0.00185005	0.000806393
10672	-4.09507	-1.39849	-2.66563	0.000359154	0.000113083
10676	-3.44598	-1.35324	-1.98468	0.000389113	0.000126477
10720	-3.96657	-2.12021	-1.94809	0.00522187	0.00274165
10729	0.277277	-4.48724	4.74157	0.000771773	0.000280329
10740	-3.26852	1.74891	-4.48348	0.00271733	0.00129282
10742	-2.38519	0.853926	-3.14617	0.00401969	0.00204697
10747	2.54758	-1.94357	4.37726	5.56179e-05	8.53255e-06
10751	0.535212	2.69305	-1.52628	0.00319386	0.00153921
10755	0.825973	-3.19227	3.95268	2.01086e-08	4.41474e-10
10775	-2.6843	1.00945	-3.69375	0.000344513	0.000107735
10790	-0.912026	2.80383	-3.16721	0.00895136	0.00528693
10794	-3.05902	2.76129	-5.51435	0.0021193	0.000943613
10798	-0.484651	1.43442	-1.91907	0.00784331	0.00451489
10801	0.307782	2.709	-2.95608	0.000344513	0.000107735
10803	0.489356	-3.77058	4.6062	1.57028e-05	1.70691e-06
10806	-1.15421	-3.66889	2.38787	0.00127993	0.00052054
10813	-0.188996	-4.28903	4.34348	4.75335e-06	3.8683e-07
10814	-0.865665	-4.38248	3.22631	0.000278705	6.87994e-05
10828	-0.0668132	2.74222	-3.14795	0.000278705	6.87994e-05
10840	-4.13203	-2.66234	-1.93254	0.000590154	0.000199246
10849	3.07777	-2.26257	5.27073	0.000344513	0.000107735
10850	-2.4111	-3.8759	1.75275	0.00248325	0.00113891
10852	2.9797	0.125075	2.25362	3.02363e-05	4.14484e-06
10856	-0.331859	-3.42488	3.22638	0.000659253	0.00023546
10866	-3.05371	0.190921	-3.27623	8.48633e-05	1.71999e-05
10873	0.0187606	-2.89884	3.1119	3.7149e-05	5.46046e-06
10885	-0.919151	-3.78515	3.07652	5.93651e-05	9.18689e-06
10892	-0.19682	-3.63749	3.23955	6.67582e-10	8.04315e-12
10894	-0.360744	-3.4681	2.88086	0.00194813	0.000852794
10926	2.92344	-1.60295	3.22866	0.00121562	0.00048104
10927	-1.36455	-4.16566	2.85861	0.00175526	0.000754148
10934	0.550912	-3.34633	3.21654	0.000378983	0.000122371
10938	-4.20284	-2.29793	-1.76135	0.0021356	0.000951444
10939	-3.11769	-0.702785	-2.58889	2.71272e-07	1.1185e-08
10941	2.19027	-0.180498	1.84665	0.00784331	0.00451489
10949	-4.20474	-1.05994	-3.04012	1.88776e-06	1.24007e-07
10972	-3.57964	-1.4129	-2.12792	2.06859e-05	2.50022e-06
10974	3.19629	0.424031	2.86341	0.00110018	0.000430942
10978	-0.14919	-2.3391	2.43284	0.0021193	0.000943613
10985	-2.90838	1.37952	-4.21148	0.000344513	9.05766e-05
10999	1.20792	-2.969	4.12796	6.72633e-05	1.08774e-05
11004	-3.99996	-2.55296	-1.65968	0.00173618	0.000727475
11008	2.61335	-2.59252	4.74945	0.000190229	4.38009e-05
11013	-3.57542	-1.65728	-1.99756	0.00175526	0.000754148
11014	-4.35858	-1.6553	-2.51838	0.00271733	0.00129282
11018	-3.30531	-1.02754	-2.07958	0.00175526	0.000754148
11019	1.66338	-2.62083	4.09734	2.35757e-07	8.07948e-09
11022	-2.43656	1.97872	-4.0683	0.0024795	0.00113519
11030	-3.66504	-1.20261	-2.64164	8.48633e-05	1.71999e-05
11031	-3.37355	-0.395116	-3.03305	1.23412e-06	7.79792e-08
11057	-2.2975	-3.14603	1.44817	0.00437386	0.00227183
11066	2.04074	-0.731203	2.47693	0.000279666	6.92614e-05
11071	-4.28326	-2.61348	-1.51348	0.00629848	0.00347892
11072	0.595228	-2.58998	2.8305	0.00814851	0.00475821
11073	-3.58468	-1.74064	-2.28052	0.00175526	0.000754148
11079	-3.27301	-1.61009	-1.66292	0.00812167	0.00474036
11105	-4.04113	0.299531	-4.34066	8.48633e-05	1.71999e-05
11111	2.75094	-1.08969	3.92407	0.000344513	0.000107735
11117	-1.88842	1.99982	-3.50575	0.00271733	0.00129282
11128	-3.94089	2.05292	-5.85618	0.000344513	0.000107735
11142	0.166189	-4.75245	4.95964	8.48633e-05	1.71999e-05
11146	-2.72453	0.192772	-3.02264	0.00382827	0.0019126
11155	-3.77249	0.901958	-4.54704	0.000606012	0.000215471
11176	-0.652917	2.69631	-2.61492	0.00437332	0.00227038
11186	1.97809	0.145233	1.91283	0.00544078	0.00290175
11187	-4.42235	-2.12081	-1.98657	0.00429487	0.0022078
11191	-4.2625	2.29622	-6.20959	0.000243862	5.79131e-05
11194	-2.11022	2.71277	-3.51762	8.48633e-05	1.69877e-05
11199	-3.65325	2.21706	-4.46833	6.75892e-05	1.09663e-05
11200	-4.16136	1.87334	-5.84454	8.59207e-06	8.53456e-07
11203	-3.18833	2.07057	-5.32199	1.22623e-08	2.46232e-10
11204	-4.24624	2.60744	-6.67144	2.4431e-08	5.62535e-10
11214	-0.314747	-3.34612	2.97934	3.63482e-05	5.17731e-06
11219	-4.37489	-2.52776	-1.79985	1.08099e-06	6.65668e-08
11243	-4.85942	-0.955149	-4.05649	3.62489e-06	2.66267e-07
11246	-3.03337	2.40791	-4.99135	0.00177899	0.000773994
11280	-0.0868337	1.74676	-1.54008	0.00523078	0.00275334
11287	-2.54949	1.55333	-4.1294	0.00142415	0.000581099
11297	-4.19185	-2.15512	-1.77094	1.42933e-06	9.14631e-08
11309	0.664664	-3.16817	3.94595	0.000344513	0.000107735
11310	-3.79407	-1.27906	-2.78294	1.80202e-08	3.81151e-10
11315	-3.14903	0.372237	-3.52126	0.00401969	0.00204697
11330	-4.95215	-2.16804	-2.53973	0.00113686	0.000446524
11343	-4.3211	1.34987	-5.39394	2.06859e-05	2.71935e-06
11349	0.424424	-2.37874	2.92549	0.00122906	0.000487019
11358	-0.0944478	2.98684	-2.79938	0.000880655	0.000326797
11384	-3.99521	2.22867	-6.17977	0.00127127	0.000511237
11393	0.201911	2.03703	-1.99384	0.00631817	0.00349149
11411	-3.21612	0.571731	-3.00521	0.00110018	0.000427249
11416	0.950757	2.35575	-1.60393	0.00784331	0.00450868
11417	-1.81014	1.33929	-3.09264	8.48633e-05	1.71999e-05
11419	0.31392	1.94651	-1.47053	6.14799e-05	9.59646e-06
11428	0.794801	-4.10234	5.02372	2.22938e-12	8.95333e-15
11461	-4.04221	0.425025	-4.47593	0.00421431	0.00216188
11487	-2.29135	1.9657	-4.54412	2.55611e-07	1.0334e-08
11513	-3.90212	-0.721027	-2.87441	0.000880655	0.000323981
11515	-3.09554	3.1058	-5.78215	0.00812167	0.00474036
11519	-2.34098	1.4763	-3.11378	0.000278705	6.87994e-05
11523	-0.988504	1.79101	-3.04891	8.14459e-05	1.34762e-05
11534	1.48221	-3.27872	4.79989	1.22623e-08	2.46232e-10
11536	-3.68919	-0.775018	-2.42038	0.00437332	0.00227038
11539	2.69028	-0.818453	3.3102	6.32505e-06	5.94402e-07
11545	-4.33846	-2.08955	-2.1507	5.39641e-07	2.4273e-08
11548	-4.38431	-2.35894	-1.70214	1.72635e-05	1.89506e-06
11554	3.49558	-0.940537	4.36373	3.70685e-05	5.43869e-06
11561	3.30661	-3.08978	6.19744	0.000344513	0.000102823
11575	-3.96557	1.05017	-4.58647	3.00101e-08	7.18877e-10
11584	-2.13566	1.1381	-3.12138	0.000278705	6.87994e-05
11599	-3.2009	-0.910565	-2.62536	0.00126259	0.000503346
11609	-3.13545	0.281471	-3.41692	0.000344513	0.000107735
11617	-4.09888	0.0490598	-3.95054	2.06859e-05	2.71935e-06
11626	-0.994666	-3.72914	2.54178	9.35194e-06	9.32391e-07
11632	3.64593	-1.6167	5.18899	2.06859e-05	2.71935e-06
11633	1.63535	-2.38878	4.43115	8.48633e-05	1.71999e-05
11634	2.79068	-2.20802	5.20604	0.000344513	0.000107735
11635	3.69488	-2.56103	6.0725	8.48633e-05	1.71999e-05
11636	3.2937	-2.96819	6.50109	1.08099e-06	6.65668e-08
11638	-0.739126	-3.51267	2.59053	0.000880655	0.000326797
11641	3.12044	-0.0786603	3.23794	0.000278705	6.87994e-05
11642	1.16977	-2.71496	3.96851	1.08099e-06	6.65668e-08
11643	0.975435	-1.90315	2.57545	5.05927e-06	4.65967e-07
11646	-0.379087	2.8202	-3.19929	0.00812167	0.00474036
11649	-0.0459735	-3.8412	3.07875	1.39985e-05	1.48418e-06
11657	-4.72773	-2.64245	-2.2397	0.00638759	0.00356234
11675	-4.09184	-1.848	-2.20556	5.54706e-07	2.57084e-08
11692	-3.98999	1.60491	-5.66144	1.08099e-06	6.65668e-08
11693	-2.94973	0.25305	-3.11892	0.000344513	0.000107735
11699	-0.224427	-4.25994	3.49139	0.000389113	0.000126477
11705	-4.22312	-0.243324	-3.54676	2.55611e-07	1.02913e-08
11749	-4.4258	-2.72486	-1.70093	5.30346e-05	8.10783e-06
11757	-1.28971	1.45848	-2.89354	0.00526076	0.00278461
11761	-2.61944	-1.13371	-1.56003	0.000378983	0.000122371
11763	-3.74131	0.00491918	-3.73387	0.000590154	0.000199246
11768	-2.98346	1.16743	-3.22471	0.00269016	0.00124244
11786	1.21047	-2.1891	3.50768	0.00127127	0.000515996
11799	-4.1112	0.443253	-4.35954	2.21549e-05	2.99551e-06
11811	0.570188	3.65089	-2.63026	0.000880655	0.000326797
11833	-1.33054	-4.35523	2.97134	0.00437332	0.00227038
11847	-1.14813	1.50639	-2.67881	2.21549e-05	2.9871e-06
11855	-3.62851	1.98657	-5.27699	8.48633e-05	1.71999e-05
11858	-2.87054	0.143648	-2.86914	0.00812167	0.00474036
11871	1.68064	-2.90173	4.50442	0.000543967	0.000182196
11886	-2.43551	1.67279	-2.39458	0.00274275	0.00130565
11891	-4.22373	-2.53515	-1.68858	0.00744741	0.00423117
11911	-2.96751	2.53113	-5.18393	0.000606012	0.000215471
11930	4.39649	2.49262	1.85857	0.00032408	8.25852e-05
11976	-4.15225	1.44344	-5.3362	2.56938e-09	3.78356e-11
11977	-4.29392	-1.73029	-2.80383	0.00032408	8.29507e-05
11979	-2.51018	2.36325	-4.78769	8.48633e-05	1.71999e-05
11980	-3.94975	-1.33665	-2.86483	0.00175526	0.000754148
11982	-3.34361	1.78855	-4.81737	0.000344513	0.000107735
11986	3.19838	-1.74149	5.16114	4.05491e-06	3.11582e-07
11987	3.33885	0.129102	2.31523	0.00812167	0.00474036
11988	-3.67991	-1.37166	-2.31705	0.00359812	0.00178028
12002	-4.38463	-0.608902	-3.77572	0.000344513	0.000107735
12007	-4.21288	-1.74411	-1.95585	0.00325718	0.00157583
12030	-4.08765	-1.3718	-2.77711	8.23905e-07	4.1471e-08
12040	-4.09128	3.00315	-6.73211	0.000382142	0.000123595
12055	-4.33253	-0.912936	-3.00512	0.00416248	0.00212414
12077	1.00323	2.37017	-1.83652	0.0018718	0.000818883
12086	-0.23184	1.95205	-2.45929	0.000982446	0.000369831
12089	-3.27381	2.20367	-4.98721	4.75335e-06	4.26728e-07
12090	0.0963987	2.25249	-1.41466	0.00125602	0.000499717
12093	-3.76865	-1.00155	-2.48167	0.00587433	0.00323206
12095	-3.27545	-0.156647	-3.00307	0.00526076	0.00278461
12122	-4.06579	-1.75626	-2.37302	3.61549e-05	5.12074e-06
12124	3.2358	-0.0803755	3.59727	0.000344513	0.000107735
12136	-1.5139	-3.52883	1.81361	0.00175526	0.000754148
12138	-2.93311	-4.20859	1.45505	0.0042881	0.00220203
12139	-2.17946	1.34941	-3.47066	0.00744741	0.00423117
12145	-2.02524	2.90286	-4.45706	0.00281735	0.00134871
12155	-2.49694	2.03605	-4.55454	1.08099e-06	6.65668e-08
12158	-3.71262	0.873918	-4.70846	1.08099e-06	6.65668e-08
12171	-0.246153	3.03883	-3.28499	0.000278705	6.87994e-05
12176	-2.72534	-4.54375	2.10978	0.00117838	0.000465987
12182	-2.8141	2.1181	-3.05756	0.00744741	0.00423117
12184	-3.7719	1.72995	-5.55592	2.06859e-05	2.71935e-06
12199	2.95819	-2.77046	5.70483	1.80925e-05	2.01512e-06
12274	-3.99615	0.0422849	-3.99669	0.00198087	0.000868189
12279	-3.91305	-2.34177	-1.48125	0.00166624	0.000691032
12281	3.37639	0.146005	3.12506	0.00401969	0.00204697
12301	3.34965	0.285356	3.43452	9.19758e-05	1.90354e-05
12303	-4.98788	-3.05843	-1.94164	0.000344513	0.000107735
12318	-3.98249	-1.11505	-2.36324	0.00122906	0.000487019
12320	-3.42886	-1.55628	-2.03001	3.6886e-05	5.30328e-06
12343	-4.29723	-2.00531	-2.42872	7.18339e-06	6.92375e-07
12359	0.963934	-1.59225	2.8275	0.00248325	0.00113891
12361	-4.17821	-1.92965	-1.83408	0.000590154	0.000199246
12366	-3.63936	2.3793	-5.0633	3.23456e-05	4.45997e-06
12367	-1.39104	0.705787	-2.23434	0.00146911	0.000605346
12368	2.63641	0.653883	1.98253	0.000466328	0.000153195
12381	3.23153	0.73947	2.24214	0.000151871	3.43997e-05
12387	-3.60043	-1.37113	-2.53515	0.000606012	0.000215471
12413	-0.533318	1.65316	-2.34879	0.000375055	0.000120399
12456	-4.36022	-1.48499	-2.87524	0.000595288	0.000206398
12458	2.14896	-3.15428	5.45481	3.61549e-05	5.12074e-06
12478	-4.89732	-1.30286	-3.51508	0.00587433	0.00323206
12479	-4.07177	-1.54052	-2.43188	4.05491e-06	3.10019e-07
12480	0.52251	2.51206	-1.95142	0.000543967	0.000182196
12490	-3.51493	0.987449	-4.96117	8.48633e-05	1.71999e-05
12491	-3.93126	1.61397	-5.02798	8.48633e-05	1.71999e-05
12550	-1.39105	-4.90857	2.9214	0.00271733	0.00129282
12551	-1.64862	-3.37448	2.38454	0.00445188	0.00231712
12587	0.31892	-3.73036	3.3985	0.000771773	0.000280329
12599	-1.05404	1.15644	-2.87951	8.15818e-08	2.44221e-09
12602	-1.73924	2.74338	-4.19464	0.00401969	0.00204697
12606	0.322282	3.12411	-2.16373	0.00177899	0.000773994
12608	-2.5382	2.9201	-5.34968	8.48633e-05	1.71999e-05
12638	-2.64702	2.08663	-4.85961	8.48633e-05	1.71999e-05
12641	-2.90755	1.03529	-3.98825	0.00175526	0.000754148
12648	2.02615	-1.81725	3.93244	0.00106808	0.000406641
12656	-2.32577	2.29718	-4.08363	0.00175526	0.000754148
12661	-3.58722	1.48929	-4.81033	0.000344513	0.000107735
12676	2.92847	-1.21721	4.52361	8.48633e-05	1.71999e-05
12682	2.93396	-0.66238	3.09859	0.00117838	0.000465987
12696	-2.74302	1.95392	-4.35555	0.000606012	0.000215471
12702	-3.19668	1.95764	-5.5197	8.48633e-05	1.71999e-05
12703	-3.69113	2.45213	-5.73074	8.48633e-05	1.71999e-05
12705	1.56374	3.19496	-1.61086	0.000151871	3.43997e-05
12738	1.55497	-3.86002	5.16975	0.00452729	0.00236365
12745	1.79759	-2.89219	4.48658	6.48034e-05	1.01326e-05
12746	2.49892	-3.38641	6.33009	4.92284e-10	5.79933e-12
12749	2.63463	-1.80571	4.44034	0.00638759	0.00354355
12752	-2.61376	-4.78423	2.17046	0.000959725	0.000358452
12763	-1.99233	-4.26069	2.21928	0.000150887	3.2884e-05
12764	-2.71373	0.00889457	-2.44595	0.00784683	0.00451902
12777	-2.01771	-4.14056	2.18325	0.000378983	0.000122371
12779	-1.34755	-3.25877	1.96795	0.00110018	0.000430942
12787	0.864241	-3.52888	4.44965	0.000344513	0.000107735
12810	-3.28767	1.32974	-4.48243	7.10924e-12	4.94887e-14
12814	-0.989957	-2.57975	1.53112	0.00117838	0.000465987
12822	2.27902	-0.407256	2.59948	0.00812167	0.00474036
12824	-2.97247	-0.888951	-2.10617	0.00331389	0.0016219
12834	3.08103	1.03413	1.86699	0.00755477	0.00430227
12841	-1.55008	0.157083	-1.98035	0.00559425	0.00298659
12854	-3.79459	-0.347599	-3.16272	0.000122996	2.61139e-05
12858	-1.18946	0.424441	-1.90826	0.00946662	0.00564155
12864	0.127474	-3.8855	3.96684	3.62489e-06	2.66893e-07
12875	-3.46076	-2.31325	-1.40627	0.0051389	0.00269259
12878	-1.07669	2.50184	-3.57854	0.000606012	0.000215471
12947	2.11932	-1.96124	2.58701	0.00382827	0.0019126
12956	-2.96359	0.846801	-3.93635	0.000344513	0.000107735
12998	3.0657	-3.27829	6.69385	0.000344513	0.000107735
13001	-0.931733	-3.77901	2.84727	0.00266749	0.00122983
13003	-2.21646	-0.103381	-2.11308	0.000880655	0.000326797
13023	3.45597	0.553169	2.9028	5.30346e-05	8.10783e-06
13024	-4.27032	-2.31944	-1.95088	0.00113686	0.000446524
13027	-0.160259	2.15272	-2.32387	0.00110018	0.000430942
13033	-3.12849	-0.331787	-2.70773	0.00421431	0.00216188
13035	-4.11339	-1.91314	-2.26574	0.000344513	0.000107735
13038	2.93866	-2.70824	5.49144	1.88776e-06	1.24007e-07
13053	-0.999678	2.43704	-3.40431	0.00577344	0.00311318
13057	-2.19238	1.72469	-3.80601	0.00217705	0.000976354
13064	-4.39042	-2.16936	-2.00431	0.00401969	0.00204697
13067	-3.77549	-0.303206	-3.66078	2.16394e-08	4.92464e-10
13077	3.06184	-2.63575	5.49738	8.48633e-05	1.71999e-05
13081	2.27664	-1.02593	2.98576	0.000344513	0.000107735
13088	-3.62548	-1.90282	-1.60716	0.0029724	0.00142612
13112	2.60496	-2.22447	5.10435	0.00217705	0.000976354
13130	-3.67501	-0.949046	-2.5558	0.00110018	0.000430942
13134	-1.80073	-4.33792	2.80026	3.9209e-06	2.94986e-07
13154	-3.84021	-2.05204	-1.74803	0.00437332	0.00227035
13158	-2.14535	-4.07697	2.15045	8.48633e-05	1.71999e-05
13160	2.45392	-2.11357	4.52792	0.000344513	0.000107735
13179	1.73434	-2.94537	4.86894	8.48633e-05	1.71999e-05
13180	2.27954	-3.76429	5.42843	8.48633e-05	1.71999e-05
13183	3.36974	-3.49724	6.42321	0.000278705	6.8556e-05
13185	3.04808	-2.9838	5.80956	5.6838e-08	1.59786e-09
13186	3.0633	-1.95629	4.92551	2.06859e-05	2.71935e-06
13229	-1.65513	0.94132	-3.14766	8.48633e-05	1.63971e-05
13269	-0.719119	2.50234	-3.11924	0.000606012	0.000215471
13272	-1.75904	1.35391	-3.17792	0.000344513	0.000107735
13276	-0.177582	3.27198	-3.44957	0.000151871	3.43997e-05
13292	0.13779	2.33859	-2.2008	0.00175526	0.000754148
13299	2.28507	-2.39967	4.91942	8.48633e-05	1.71999e-05
13300	2.19886	-3.42359	5.55396	1.08099e-06	6.65668e-08
13301	4.65205	-4.12747	8.74511	0.000344513	0.000107735
13302	0.454681	-3.70394	4.3106	2.55611e-07	1.0334e-08
13304	2.35931	-2.69634	5.3219	2.06859e-05	2.71935e-06
13309	2.15281	-2.70266	5.65179	4.75335e-06	4.26728e-07
13310	2.86352	-2.34353	4.93378	8.48633e-05	1.71999e-05
13323	-2.50187	2.5822	-5.00132	8.48633e-05	1.71999e-05
13326	3.46257	-3.57093	7.01125	1.08099e-06	6.65668e-08
13333	-1.96458	-3.6227	1.84034	0.0037485	0.00186271
13338	-1.84894	2.3574	-3.95516	0.000880655	0.000326797
13350	2.22938	-2.46592	4.53062	0.00110018	0.000430942
13379	-3.01386	2.08625	-5.06291	0.000344513	0.000107735
13391	-1.88926	2.77213	-3.81173	0.000595288	0.000206398
13407	0.545423	-3.83005	4.26243	4.05491e-06	3.10019e-07
13408	-1.52011	-4.36536	2.98231	1.07244e-07	3.44559e-09
13409	-2.2321	-4.22838	2.42753	0.00175526	0.000754148
13417	0.717903	3.00638	-2.38109	0.00127127	0.000515996
13437	-2.87327	-0.0216177	-2.61212	0.00784331	0.00451489
13446	-1.38739	2.80074	-3.73933	0.000322778	8.15804e-05
13447	-0.75368	2.97178	-3.38823	0.00421431	0.00216188
13461	0.133015	2.31161	-2.56277	0.0024795	0.00113519
13468	-3.68111	-0.567942	-3.08749	0.000344513	0.000107735
13475	-1.22197	1.98541	-3.22165	0.000344513	0.000107735
13482	2.86853	-0.364128	3.38667	0.000375055	0.000120399
13486	1.48739	3.24428	-2.45218	0.000278705	6.87994e-05
13488	-0.309586	3.03156	-2.79532	0.00812167	0.00474036
13497	-3.66462	-1.11162	-2.8658	0.000344513	0.000107735
13498	-1.8567	1.06498	-2.61592	0.000375055	0.000120399
13522	1.74688	-2.30987	3.25675	0.00325962	0.00157788
13526	2.76043	1.4454	1.54567	0.00812167	0.00474036
13551	-3.88335	-1.64576	-1.95621	0.00744741	0.00423117
13565	-0.68827	-3.88065	3.02627	0.000771773	0.000280329
13577	0.599206	-3.72236	4.68285	0.000344513	0.000107735
13578	-2.95808	-4.15875	1.45637	0.00421431	0.00216188
13579	0.0805881	-3.33238	3.02865	1.08099e-06	5.98938e-08
13581	-1.48663	-2.68503	1.70036	0.00812167	0.00474036
13582	-1.29025	-3.80476	2.37126	0.00319386	0.00153921
13585	-1.19661	-2.71665	1.63761	0.00281735	0.00134871
13593	-1.16338	-3.99124	3.38261	0.00175526	0.000754148
13613	2.64793	-2.18619	4.3625	6.86501e-06	6.50659e-07
13616	-2.47827	1.39758	-3.78965	0.000606012	0.000215471
13618	-4.12578	0.920824	-5.32465	2.06859e-05	2.71935e-06
13628	1.2874	3.17084	-1.81266	0.000322778	8.15804e-05
13639	-2.25224	2.11305	-3.72178	0.00587433	0.00323206
13662	-3.55778	0.0256486	-3.09323	0.00161428	0.000668187
13678	-2.98605	-0.964585	-2.07067	0.000251493	6.00621e-05
13680	-3.75992	-1.16847	-2.53557	0.000323142	8.19318e-05
13683	-3.42657	-2.13797	-1.40272	0.00050502	0.000167123
13690	3.35728	1.11319	2.12564	0.00271733	0.00129282
13707	3.38517	-0.470293	3.93444	1.57915e-06	1.01894e-07
13708	3.49032	-1.29018	4.89938	2.27018e-06	1.54992e-07
13709	3.51529	-3.06252	6.20431	3.6886e-05	5.30328e-06
13710	-4.43916	-0.881597	-3.72043	5.6838e-08	1.59786e-09
13721	-4.36667	-2.71031	-2.05882	0.000880655	0.000323981
13727	0.981233	-0.586705	2.36801	0.00437332	0.00227038
13731	2.03554	-0.337965	2.97762	0.00526076	0.00278461
13738	-3.10285	2.43023	-3.96078	0.00175526	0.000754148
13752	-3.32962	1.40486	-4.67384	4.75335e-06	4.26728e-07
13761	-3.84687	-2.23462	-1.58836	2.18703e-07	7.36754e-09
13764	2.8974	-2.93967	5.57315	0.00110018	0.000430942
13779	-4.16812	-1.10532	-2.80135	9.19758e-05	1.90354e-05
13782	3.26987	1.30081	2.16916	0.0021193	0.000938312
13795	-3.03226	-1.50117	-2.04523	0.000323142	8.19318e-05
13802	-0.934557	2.63978	-3.78482	0.00946662	0.00566984
13805	-3.69777	-0.477231	-3.23802	0.000344513	0.000107735
13806	-1.09739	-4.15725	2.7807	0.00110018	0.000430942
13811	2.98138	-0.10013	3.08151	0.000278705	6.87994e-05
13813	-1.11333	-3.62424	2.4152	0.000543967	0.000182196
13814	0.357551	-4.23462	4.7017	1.36476e-05	1.43642e-06
13817	3.14208	-1.67563	4.75377	3.73136e-12	2.06342e-14
13818	-0.919511	-3.54479	2.63396	0.000151871	3.43997e-05
13821	-3.10187	2.27483	-5.04359	2.06859e-05	2.71935e-06
13827	-1.74859	2.63105	-4.37965	1.57028e-05	1.70691e-06
13829	-3.44382	-1.04503	-2.21806	0.0016787	0.000701591
13835	-4.33114	-2.32289	-2.27382	0.000344513	0.000107735
13839	0.110883	3.28325	-3.17236	5.30346e-05	8.10783e-06
13851	0.209959	2.87058	-2.32326	0.00587433	0.00323206
13852	-4.46377	-2.97986	-1.47209	0.00526076	0.00278461
13864	0.1953	2.82697	-2.35123	0.00437332	0.00227038
13873	-4.0122	0.337685	-4.10942	0.00072333	0.000261057
13887	-0.0237344	-2.66447	2.85989	3.21487e-06	2.30678e-07
13888	2.96987	-3.33869	5.83363	0.000375055	0.000120399
13907	-2.02651	2.57508	-4.43281	3.70685e-05	5.43869e-06
13921	-1.37626	2.80263	-4.0767	2.21549e-05	2.9871e-06
13926	-4.35773	-1.6216	-2.13528	0.000279666	6.92614e-05
13952	3.24089	-0.657128	3.76988	0.000344513	0.000107735
13981	-4.33143	0.443003	-4.74187	0.000344513	0.000107735
13993	0.544077	2.90867	-2.70303	0.000190229	4.38009e-05
13996	2.61467	0.372632	2.22423	2.06859e-05	2.71935e-06
14013	-3.30659	0.37608	-3.67848	4.75335e-06	4.26728e-07
14018	-2.90842	-0.664243	-2.24418	0.00177899	0.000773994
14042	1.26172	2.79973	-1.70353	0.002311	0.00103887
14043	-1.11187	1.68843	-2.8003	0.000151871	3.43997e-05
14051	2.38777	1.2194	1.57753	0.000389113	0.000126787
14056	-4.18916	-0.309513	-3.73727	1.00302e-07	3.19571e-09
14086	-3.25758	-0.608561	-3.4373	1.29203e-05	1.3491e-06
14089	3.24636	1.55738	1.78782	0.00577344	0.00310657
14097	-1.99443	1.29007	-3.0417	0.00398626	0.00199793
14111	-2.40752	1.76005	-4.29	8.48633e-05	1.71999e-05
14114	-2.62788	0.677044	-2.86085	0.000595288	0.000206398
14124	-4.05038	0.705778	-4.76039	9.77262e-13	3.1398e-15
14142	-0.127832	-1.56997	1.49473	0.00437332	0.00227038
14146	1.7783	-1.05198	2.73793	9.19758e-05	1.90354e-05
14153	1.12621	-0.830701	2.17306	0.000201816	4.65771e-05
14154	-4.44749	-1.4635	-2.984	0.000344513	0.000107735
14165	-0.149825	2.15248	-2.4181	0.00587433	0.00323206
14169	-3.2332	0.491441	-3.57779	0.000149915	3.26322e-05
14170	-1.21391	2.5484	-4.05741	2.06859e-05	2.71935e-06
14187	-4.41133	-1.52013	-2.58853	4.38584e-08	1.1038e-09
14189	1.96892	2.86811	-1.48004	0.00452729	0.00236365
14211	-3.81468	-2.0263	-2.09405	0.000279666	6.92614e-05
14217	-4.09188	-1.72138	-2.11832	0.00177728	0.000768964
14221	2.67933	-1.93461	4.15965	0.000344513	0.000107735
14231	0.478342	-3.16753	3.67159	0.000243862	5.79131e-05
14238	-3.12887	0.071747	-3.58699	8.48633e-05	1.71999e-05
14243	-3.64941	-0.614599	-2.84362	6.72633e-05	1.08774e-05
14283	-3.15161	-0.588842	-2.85467	0.00401969	0.00204697
14295	-4.16811	0.878495	-4.63284	1.87069e-08	4.05691e-10
14298	-3.97875	-0.866164	-2.90765	0.00325718	0.00157583
14309	-4.03433	-2.01994	-2.14816	9.93088e-06	1.00239e-06
14310	-3.33405	0.88779	-3.04891	0.00638759	0.00354355
14311	3.77516	-1.03078	5.0837	0.000344513	0.000107735
14334	-3.61232	-1.93533	-1.99673	0.00175526	0.000754148
14356	1.73895	-0.238132	1.68513	0.00596833	0.00329177
14366	-0.117026	1.8635	-2.34447	0.000344513	0.000107735
14369	3.19784	0.968224	1.71465	0.00946662	0.00564155
14373	0.160466	2.97597	-2.77052	0.000982446	0.000369831
14376	-3.9228	2.38228	-6.25951	0.000278705	6.87994e-05
14382	-1.22025	-4.72752	3.12116	0.000344513	0.000107735
14402	2.29102	-1.86777	4.6419	0.00110018	0.000430942
14404	1.25963	-3.51104	4.5709	0.00127127	0.000511237
14405	-2.11766	-4.02097	1.78665	0.00587433	0.00322494
14406	-0.629063	-3.0888	2.38024	0.00335619	0.00165608
14407	-0.462347	-3.1564	2.81864	0.00142415	0.000581099
14408	-0.920518	-2.96394	1.91251	0.00127127	0.000515996
14409	1.11757	-2.47089	3.6993	0.000375055	0.000120399
14410	-0.455153	-4.28586	3.7005	0.000771773	0.000280329
14411	2.16638	-2.35943	4.52581	8.48633e-05	1.71999e-05
14412	1.19188	-2.39673	3.22663	0.000139682	2.99185e-05
14416	-1.51785	-3.35581	1.83795	0.00638759	0.00356234
14419	1.28674	-1.45087	2.84855	0.000880655	0.000323981
14421	2.56444	-2.72284	4.99086	4.75335e-06	4.26728e-07
14423	2.32184	-3.60581	5.71801	1.08099e-06	6.65668e-08
14425	1.71822	-3.41224	4.75475	0.00587433	0.00323206
14426	2.63382	-3.13311	5.68632	0.000344513	0.000107735
14446	-3.70797	-0.887458	-2.61521	0.00577344	0.00311318
14493	1.16956	-1.8719	3.19684	0.000344513	0.000107735
14501	1.71084	-1.35243	3.42104	0.000543967	0.000182196
14517	2.5311	-2.0629	4.77173	5.40923e-14	7.24128e-17
14519	3.73324	1.06071	2.73017	0.000322778	8.15804e-05
14539	-4.32949	0.0643206	-4.34365	8.48633e-05	1.71999e-05
14541	0.314435	-3.95952	3.83693	5.50095e-06	5.11066e-07
14554	-3.26069	-1.77215	-1.46605	0.00587433	0.00323206
14557	-2.42876	2.6419	-4.7145	2.06859e-05	2.66965e-06
14559	-4.03295	-2.58647	-1.69604	0.000374761	0.000118599
14560	1.25583	-1.15013	2.66746	6.72633e-05	1.07376e-05
14591	0.222754	-2.44201	2.35464	0.00884009	0.00519755
14596	-3.97818	-1.70976	-1.62362	0.00113686	0.000446524
14611	-0.193872	2.14289	-2.55996	2.40884e-06	1.67684e-07
14613	-4.04989	-2.22825	-1.67644	0.00011775	2.49688e-05
14617	-0.153515	-3.54538	2.6878	9.94904e-06	1.00689e-06
14620	-1.70664	1.55168	-3.25832	0.00523078	0.00275334
14629	-1.04553	2.11668	-2.88235	3.61549e-05	5.12074e-06
14650	1.03675	-3.52566	4.77349	3.73136e-12	2.19786e-14
14661	-4.79111	-3.11155	-1.81611	0.00258464	0.00118679
14668	-3.19573	-0.686464	-2.61304	0.000243862	5.79131e-05
14669	0.929505	2.59974	-1.90829	8.48633e-05	1.71999e-05
14676	-1.9111	1.7818	-3.12439	0.000151871	3.43997e-05
14688	-3.01218	1.03187	-3.59492	0.00271733	0.00129282
14689	-1.75755	2.36637	-4.1681	0.000278705	6.87994e-05
14691	2.59648	-1.62635	4.03888	0.000344513	0.000107735
14703	1.97052	-1.52506	3.43271	0.000543967	0.000182196
14706	-3.60524	-0.410709	-3.19454	4.62243e-07	2.06679e-08
14719	0.668807	-4.32454	4.8398	0.00032408	8.25852e-05
14736	-3.13668	0.690398	-3.54393	0.00246685	0.00111619
14742	2.63021	-0.767783	3.28446	0.00271733	0.00129282
14745	-2.25178	2.35683	-4.60807	0.000151871	3.43997e-05
14758	2.47266	0.0171941	2.25249	0.00246685	0.00111619
14763	-0.135536	1.44758	-1.62218	8.48633e-05	1.71999e-05
14783	0.0620888	-2.77959	2.70273	0.00032408	8.25852e-05
14788	-2.55985	2.78031	-5.34107	2.06859e-05	2.71935e-06
14806	-1.97265	2.02654	-3.74438	0.00217705	0.000976354
14808	2.52476	-0.976234	3.16766	0.00587433	0.00323206
14816	0.951188	-1.74705	2.94769	0.00013365	2.85908e-05
14818	-2.34562	-3.96026	1.9702	0.00577344	0.00311318
14819	-2.01246	-3.92054	2.41745	8.48633e-05	1.67232e-05
14824	-0.384322	-3.67127	3.00334	1.05604e-10	1.07441e-12
14829	-0.779215	-4.07033	3.29111	0.000344513	0.000107735
14833	0.135251	-3.73702	4.01769	1.25201e-19	3.3521e-23
14842	-2.24029	-0.817444	-1.87652	0.00401969	0.00204697
14846	-2.65465	2.27644	-4.82145	0.000344513	0.000107735
14889	-4.35867	-0.319179	-3.90457	0.000344513	0.000107735
14896	-3.51162	0.620634	-4.5772	8.48633e-05	1.71999e-05
14897	-4.03368	-1.15474	-2.91641	0.00127127	0.000511237
14928	-0.744999	2.7153	-3.07185	3.9209e-06	2.94986e-07
14930	-3.13389	0.257327	-2.96401	0.00146911	0.000605346
14941	-3.6462	3.02883	-6.54356	4.75335e-06	4.26728e-07
14953	4.16607	-0.0858375	4.20795	2.55611e-07	1.0334e-08
14959	-0.75678	1.7784	-2.71047	0.000149915	3.26322e-05
14975	0.525732	-2.38488	2.91061	8.48633e-05	1.71999e-05
14986	-3.78345	2.58515	-5.27321	0.00784331	0.00451489
14987	-0.473135	-4.12246	3.7088	7.83851e-05	1.28018e-05
14989	-1.32178	1.63105	-3.06456	0.00110018	0.000430942
14991	-0.909965	-4.42293	3.59355	4.37735e-07	1.92205e-08
15029	-4.49473	-1.31534	-3.03197	0.00537467	0.0028521
15031	-2.84764	2.70083	-5.52853	8.48633e-05	1.71999e-05
15036	-1.08147	1.99481	-3.15385	0.000466328	0.000153195
15039	-3.56195	0.489735	-3.92439	4.75335e-06	4.26728e-07
15042	0.118269	1.99149	-2.09625	0.0021193	0.000943613
15052	-4.05719	1.37279	-5.18374	0.00421431	0.00216188
15062	-0.489871	2.55154	-3.18139	0.000344513	0.000107735
15081	-4.48755	1.23312	-5.64243	5.6838e-08	1.59786e-09
15082	-4.64683	-0.070297	-4.08076	1.14971e-06	7.23377e-08
15085	-4.53483	-0.834206	-3.73892	9.41761e-10	1.15987e-11
15086	-3.70024	0.764891	-4.22086	1.22623e-08	2.46232e-10
15115	-3.30263	-0.694485	-3.04743	0.000344513	0.000107735
15128	1.21217	2.9937	-1.62532	0.00755477	0.00430227
15135	-0.456306	-4.23016	3.93209	0.000344513	0.000107735
15136	-2.67859	1.81506	-4.13523	6.01657e-08	1.72362e-09
15148	-0.960528	-3.90469	2.83404	7.18339e-06	6.92375e-07
15149	-3.25617	-0.280561	-2.81258	0.00125602	0.000499717
15153	-3.85633	-1.50457	-2.35319	7.25494e-05	1.17905e-05
15171	-3.94709	-1.17985	-3.07429	0.000344513	0.000107735
15184	-4.33355	-1.92971	-2.47058	0.000344513	9.8906e-05
15190	-4.01463	-2.32648	-1.83621	0.00177728	0.000768964
15192	-2.39085	2.76356	-5.00286	3.62489e-06	2.66267e-07
15261	-4.36253	1.69258	-6.05512	8.48633e-05	1.71999e-05
15262	-4.22721	-1.49071	-2.86676	0.000299405	7.43101e-05
15264	2.05813	-2.22882	3.95079	0.00127127	0.000511237
15312	2.58388	-2.79599	5.20862	2.06859e-05	2.71935e-06
15326	-4.41982	-2.04629	-2.30563	3.87536e-07	1.64975e-08
15333	0.478436	-3.21359	3.8561	8.48633e-05	1.71999e-05
15334	1.35848	-3.86095	4.6679	5.05927e-06	4.65602e-07
15348	-0.449962	-3.88125	2.95898	0.0021193	0.000943613
15350	-3.31081	-0.685131	-2.65441	4.33712e-05	6.49117e-06
15358	-0.0339071	-3.44298	2.82072	0.0018718	0.000818883
15371	-4.09672	-1.03117	-2.36084	0.000766423	0.000277431
15373	-0.265973	1.85999	-2.09205	0.000247133	5.88885e-05
15374	-4.33572	-2.71543	-1.62029	0.00685761	0.00384283
15411	-1.2896	0.626472	-2.00634	0.00401969	0.00204697
15416	-3.61176	-0.320046	-2.64754	0.000226649	5.31579e-05
15424	0.161788	-2.78009	3.07928	2.06859e-05	2.71935e-06
15425	0.107036	-1.62392	2.09408	0.00445188	0.00231712
15456	-4.31344	0.852774	-5.11591	0.00577344	0.00311318
15479	-2.40383	-3.85732	1.70346	5.54706e-07	2.51428e-08
15480	4.41024	-2.72796	6.87599	0.000344513	0.000107735
15484	2.45691	-1.80767	4.34969	3.64694e-07	1.52322e-08
15485	0.84925	-2.64141	3.31427	0.00175526	0.000754148
15528	-2.68172	1	-3.58366	0.000880655	0.000326797
15533	-0.796756	-3.25382	2.68165	0.000543967	0.000182196
15534	3.85603	-3.2737	7.24596	2.06859e-05	2.71935e-06
15543	1.40191	2.59803	-1.41343	0.00271733	0.00129282
15558	1.69957	-2.6558	3.38679	0.00279898	0.00133691
15571	-1.53886	-4.062	3.0753	4.21779e-05	6.25611e-06
15574	-3.17705	0.9058	-3.87068	0.00175526	0.000754148
15581	-3.43208	1.40864	-4.46156	8.48633e-05	1.71999e-05
15582	3.13714	-3.7789	6.37645	0.00946662	0.00566984
15597	0.491905	-3.86268	3.74427	3.76484e-07	1.58255e-08
15598	0.931246	-3.06813	3.62744	1.46912e-09	1.88803e-11
15614	-4.97811	-3.60105	-1.46468	0.0020837	0.000919953
15627	-1.73709	0.809107	-3.37779	0.00437332	0.00227038
15631	-0.651882	-2.76214	2.17678	0.000151871	3.43997e-05
15632	3.77287	-0.744462	4.40156	8.48633e-05	1.71999e-05
15633	3.64457	0.0920493	3.42934	1.14971e-06	7.23377e-08
15634	3.44384	-1.76012	5.21561	1.33924e-09	1.68526e-11
15635	2.99664	-2.68723	5.3898	8.48633e-05	1.71999e-05
15638	3.20721	1.17294	2.33227	0.00587433	0.00323206
15639	2.27468	-2.61797	4.53018	1.06439e-06	5.47159e-08
15644	-3.86452	-2.3329	-1.49737	0.00251421	0.00115378
15652	-1.18427	2.41438	-3.82743	0.000344513	0.000107735
15663	-2.91113	0.374946	-3.18093	0.00110018	0.000430942
15667	-0.0318552	1.56707	-1.89364	0.00526076	0.00278461
15673	-3.61157	3.5444	-7.16425	1.08099e-06	6.65668e-08
15693	3.23957	0.353154	2.71545	0.00271733	0.00129282
15697	2.07894	-2.00815	4.42778	3.61549e-05	5.12074e-06
15702	3.45321	-4.94071	8.3574	1.08099e-06	6.65668e-08
15703	0.755908	-4.18364	5.05567	0.000151871	3.43997e-05
15704	-2.18171	-4.07041	1.8887	0.00526076	0.00278461
15705	0.703248	-2.8191	3.62584	1.28253e-08	2.6097e-10
15707	1.35648	-4.38277	5.51182	0.000344513	0.000107735
15711	-2.25243	2.03665	-4.26143	0.00175526	0.000754148
15720	-2.43297	2.81782	-4.54351	8.48633e-05	1.71999e-05
15731	0.68036	2.30491	-1.73682	0.00946662	0.00564155
15732	-0.886076	1.82048	-2.81957	0.00812167	0.00474036
15733	2.3874	-4.7411	6.66926	1.36476e-05	1.43642e-06
15739	0.219679	-2.90721	3.26815	0.00706741	0.00396607
15740	0.865203	-3.05426	2.76667	0.00784331	0.00450868
15741	0.525976	-2.57532	3.20403	0.000344513	0.000107735
15747	-0.964108	2.53322	-3.6005	8.48633e-05	1.71999e-05
15752	-0.816784	2.91815	-2.88588	0.00812167	0.00474036
15818	-1.67291	-3.49206	1.62962	0.00176345	0.000759677
15819	-0.758871	0.572399	-1.49351	0.00587433	0.00323206
15838	0.420932	-2.70652	3.24629	4.49355e-05	6.74934e-06
15854	-0.0564296	-2.15621	2.09978	0.000659253	0.00023546
15898	-2.59813	-4.03285	1.86358	0.00271733	0.00129282
15899	-1.16983	-3.94694	2.12811	3.69547e-05	5.32306e-06
15902	-1.58375	-3.3136	1.96036	0.000606012	0.000215471
15905	0.164001	-3.14139	3.38381	8.48633e-05	1.71999e-05
15907	-0.160884	-3.19321	2.81566	9.41842e-05	1.9669e-05
15910	0.864543	-3.52889	4.65752	4.75335e-06	4.26728e-07
15912	0.67043	-3.37235	3.21789	4.19891e-05	6.21686e-06
15914	0.254363	-3.68981	3.98524	8.48633e-05	1.71999e-05
15915	-1.20774	-3.94543	2.68274	2.27018e-06	1.53761e-07
15916	-1.01214	-3.18868	1.83335	0.00382827	0.00190647
15920	0.538203	-3.18392	3.91946	8.77699e-05	1.79065e-05
15921	1.66825	-0.317267	2.13492	0.00304479	0.00146411
15928	-0.326544	-2.73469	1.80368	0.00380917	0.0018949
15929	0.864118	-4.44725	4.84878	0.000180609	4.13926e-05
15945	-4.81331	-0.473586	-4.16698	1.80925e-05	2.01512e-06
15953	-3.96517	-0.63116	-2.9269	0.00167376	0.000694599
15983	2.79624	-1.22411	3.69361	0.0018718	0.000818883
15993	-4.53909	-1.85848	-2.63239	5.93651e-05	9.18689e-06
15997	3.15875	0.674168	2.0955	0.00638759	0.00356234
16003	2.17441	0.00402732	1.98993	0.0037485	0.00186271
16004	-0.241004	-2.75026	2.57022	0.000466328	0.000153195
16006	1.53248	-2.66051	3.93677	4.02452e-12	2.47828e-14
16021	-3.94284	-0.910074	-3.97873	2.55611e-07	1.0334e-08
16024	3.03211	-2.82051	5.94241	7.0239e-07	3.42262e-08
16030	1.87038	-3.33397	5.18607	8.48633e-05	1.71999e-05
16031	2.68701	-3.2291	5.82806	4.75335e-06	4.26728e-07
16037	-1.68913	-4.04681	2.36007	0.000720666	0.000258745
16042	2.11641	-0.760538	2.36945	0.00032408	8.29507e-05
16052	-3.79418	-1.82786	-1.92806	0.000374761	0.000118599
16065	0.637296	-2.84273	3.48003	0.00117838	0.000465987
16105	-1.26065	-3.47953	1.99806	0.00202462	0.000889533
16129	-3.93197	-1.75478	-2.17719	0.000595288	0.000206398
16133	-3.2694	-0.542322	-2.3872	0.00177899	0.000773994
16134	-4.28049	-1.34962	-2.92358	5.30346e-05	8.10783e-06
16147	1.99984	-0.480815	2.29404	0.00401969	0.00204697
16158	-3.35989	-2.08967	-1.47683	0.00946662	0.00564155
16176	-3.0515	3.18337	-5.92683	0.000344513	0.000107735
16199	-3.7016	-0.296775	-3.55554	1.08099e-06	6.65668e-08
16205	-2.29681	0.535971	-2.68477	0.00401969	0.00204697
16209	-3.63726	-1.20331	-2.31945	0.00267867	0.0012357
16223	-2.86579	-0.855307	-2.6384	0.00596833	0.00329177
16233	-4.18695	-1.84718	-2.33976	0.000606012	0.000215471
16238	-0.481741	1.91511	-2.39685	0.0024795	0.00113519
16264	-0.146287	-2.68566	2.45607	0.000149915	3.26322e-05
16272	-0.725716	2.17163	-2.75378	0.00437332	0.00227038
16274	-0.231893	2.26247	-2.51102	0.00812167	0.00474036
16275	-2.23039	1.83448	-3.7718	0.00335619	0.00165608
16278	2.29217	-4.14831	5.9594	0.0016791	0.000702211
16280	0.7288	-2.87267	3.322	0.00131084	0.000533813
16293	-4.16597	-2.80197	-1.66353	0.00895136	0.00528693
16302	-4.1227	-0.768994	-3.03017	0.000243862	5.79131e-05
16304	2.70048	0.779672	1.92081	0.00271733	0.00129282
16315	-0.0333734	2.44359	-2.22283	4.75335e-06	4.26728e-07
16334	3.2741	0.00558129	3.18486	0.000344513	0.000107735
16357	0.750176	2.67716	-1.98984	2.71272e-07	1.1185e-08
16365	-0.289618	-4.20665	3.71686	2.85521e-10	3.13423e-12
16419	-3.3467	0.908596	-3.56719	0.00072333	0.000261057
16431	-1.49425	1.90895	-3.68089	0.000344513	0.000107735
16448	0.189021	-4.32138	4.5576	5.54706e-07	2.58417e-08
16469	2.46922	1.07897	1.54271	0.00946662	0.00566984
16471	-3.28138	0.267816	-3.23473	0.000322778	8.15804e-05
16473	-4.51293	1.36415	-5.67334	1.08099e-06	6.65668e-08
16476	-1.37059	0.743872	-2.11446	0.00852319	0.00498384
16477	-2.06428	1.52959	-3.44896	0.00587433	0.00323206
16486	0.762167	-2.26907	3.00896	0.000344513	0.000107735
16494	-3.2048	3.28475	-6.17145	0.000344513	0.000107735
16510	0.397655	2.69587	-2.48888	8.48633e-05	1.71999e-05
16516	-4.75423	-1.68343	-2.94504	0.000322778	8.15804e-05
16517	2.13201	0.141795	2.02075	0.00587433	0.00323206
16521	2.83748	1.30464	1.6139	0.000720666	0.000258745
16527	-3.73061	-2.51092	-1.46702	0.00416248	0.00212414
16529	-3.65127	3.4031	-7.21931	0.00177728	0.000768964
16536	-2.70301	-0.00226864	-2.62336	0.000595288	0.000206398
16541	-4.26631	-2.44287	-1.74416	7.55428e-08	2.2046e-09
16542	4.01554	1.24741	2.6521	0.00421431	0.00216188
16561	-2.81217	2.59301	-5.28577	0.000344513	0.000107735
16574	-4.71331	-3.26147	-2.08751	0.00946662	0.00564155
16585	-0.627238	2.41061	-2.78434	0.00125602	0.000499717
16599	-3.29048	1.00147	-4.34524	4.75335e-06	4.26728e-07
16613	-4.31267	-1.44298	-2.48089	0.00401969	0.00204697
16614	-3.62835	2.02738	-5.70097	2.55611e-07	1.0334e-08
16631	-3.0314	-1.40602	-2.23877	0.00587433	0.00323206
16634	3.33017	-3.34696	6.52823	2.56938e-09	3.78356e-11
16635	-1.14109	1.7161	-2.76817	0.000145944	3.13771e-05
16636	0.0801085	-2.65421	2.69489	0.000277324	6.66023e-05
16645	-3.58902	-0.654145	-2.85842	2.06859e-05	2.71935e-06
16651	0.0905882	1.40469	-1.93913	0.000753854	0.000272679
16671	-3.21191	-0.0283113	-2.53673	0.00554321	0.00295786
16683	-4.19414	-1.87562	-2.46215	0.0019684	0.000862196
16684	-3.28207	-0.136916	-2.83645	0.00127993	0.00052054
16701	2.75935	-2.8463	5.51832	1.89323e-13	4.77117e-16
16708	-3.35469	-1.26084	-1.9738	0.00577344	0.00311318
16709	-2.19883	1.33845	-3.45194	0.00784331	0.00450868
16744	0.00892427	2.53535	-2.52642	0.00266749	0.00122983
16761	-4.11272	-0.6245	-3.36858	0.000359154	0.000113083
16766	0.183051	-3.08602	3.41512	0.000595288	0.000205683
16802	-1.70995	1.94328	-3.4412	0.00437332	0.00227038
16815	1.32667	3.37239	-2.40533	0.000880655	0.000326797
16818	-3.99858	-0.938407	-3.17565	2.06859e-05	2.71935e-06
16826	-2.38865	2.07655	-4.46519	0.00248325	0.00113891
16831	-1.06024	2.20255	-2.98178	0.0027073	0.00125906
16841	-3.82344	2.87572	-6.58181	0.000344513	0.000107735
16844	-3.16173	0.292533	-3.4714	0.00072333	0.000261057
16846	3.14486	-0.443933	3.5888	0.00587433	0.00323206
16849	-1.418	2.25521	-3.85955	0.00587433	0.00323206
16850	-3.88017	-0.933227	-2.93746	0.00577344	0.00311318
16855	-4.32646	-2.19721	-1.84387	0.000515706	0.000170797
16866	2.5045	-2.45693	3.79063	0.00198539	0.000870702
16881	2.81667	-2.36545	4.4899	0.000278705	6.87994e-05
16883	2.91807	-1.3586	3.89788	0.00175526	0.000754148
16908	-3.47426	-1.01781	-2.01853	6.75892e-05	1.09663e-05
16935	-1.36822	1.71657	-2.57344	0.00784331	0.00450868
16945	-1.26179	1.46983	-2.72336	0.00110018	0.000430942
16978	2.22864	-1.49663	3.54863	3.23456e-05	4.45997e-06
16979	3.45754	-1.34743	5.02983	0.000344513	0.000107735
16980	2.45144	-1.78463	3.25372	8.48633e-05	1.71999e-05
17011	0.0661302	2.32034	-1.46622	0.00744741	0.00423117
17017	0.00083794	-3.40305	3.4141	0.00110018	0.000430942
17032	-0.309329	-3.59544	2.62997	0.00146213	0.000601687
17049	-0.540443	2.00062	-2.51375	0.00388252	0.00194282
17053	0.346126	1.89374	-1.54762	0.00946662	0.00564155
17056	-0.212799	1.72925	-1.96137	0.00266749	0.00122983
17073	-4.26815	2.14562	-6.11559	0.000344513	0.000107735
17077	2.38849	-1.16857	3.58769	4.75335e-06	4.26728e-07
17078	-3.58802	-1.01733	-2.42315	0.00106249	0.000403661
17080	-0.469446	2.37373	-2.63383	0.000344513	0.000102823
17091	2.9597	1.16156	1.9698	0.00127127	0.000515996
17098	-0.149011	3.27539	-3.04047	0.000149915	3.26322e-05
17104	0.588452	-4.11912	4.67733	1.22623e-08	2.46232e-10
17111	-3.65499	-1.91099	-1.79214	0.00367985	0.00182564
17133	-3.13856	1.93757	-4.60918	0.00638759	0.00354355
17151	2.62115	-1.85332	4.1499	8.19649e-06	7.98801e-07
17157	-0.798322	2.53315	-3.2852	2.06859e-05	2.71935e-06
17164	-0.464173	1.90269	-2.69064	0.00946662	0.00566984
17177	3.43629	-3.34526	6.83005	8.48633e-05	1.71999e-05
17195	1.86568	-1.37964	3.27971	8.48633e-05	1.71999e-05
17197	-3.92979	2.17376	-5.91057	2.56938e-09	3.78356e-11
17205	-2.33538	-0.177877	-2.1575	0.000344513	0.000107735
17208	2.7791	-2.53314	5.22142	2.56938e-09	3.78356e-11
17209	0.464945	-3.44137	3.63258	1.48027e-12	5.54855e-15
17210	2.73265	-2.34967	5.00356	2.06859e-05	2.71935e-06
17211	-1.12824	-2.82335	1.94497	0.00022102	5.11275e-05
17212	0.0864143	-3.58677	4.01118	3.73136e-12	2.06342e-14
17213	2.33934	-3.26849	5.52958	1.22623e-08	2.46232e-10
17215	2.42385	-1.71532	3.6116	2.21549e-05	2.99551e-06
17217	2.65357	-2.92801	5.43288	2.06859e-05	2.71935e-06
17218	-1.05018	-3.69832	2.25639	0.000543967	0.000182196
17221	2.33294	-2.61599	4.62796	0.000344513	0.000107735
17222	3.30917	-2.01412	5.14939	2.21549e-05	2.9871e-06
17224	-0.270472	-3.57703	3.00914	3.7793e-05	5.56523e-06
17228	0.448016	-2.55842	2.93231	0.000344513	0.000107735
17230	0.477469	-3.91366	4.17304	5.05927e-06	4.65967e-07
17231	-1.21065	-3.62524	2.494	3.52941e-07	1.46468e-08
17241	-2.42305	-3.40096	1.54994	0.00544078	0.00290175
17242	-0.221841	-4.18431	3.81667	1.04029e-05	1.06397e-06
17257	-0.710843	-3.62965	2.75638	0.000590154	0.000199246
17268	-3.03041	0.509258	-3.53967	1.57028e-05	1.70691e-06
17273	-4.85676	-2.40259	-2.15494	0.00142415	0.000581099
17274	-3.19385	-0.915168	-2.20212	0.00949078	0.00570463
17275	-2.75994	-0.140028	-2.42849	0.00761553	0.00433892
17304	-3.65749	-0.483043	-3.06383	2.06859e-05	2.71935e-06
17322	-2.54582	0.0167481	-2.28083	0.00401969	0.00204697
17324	-4.18069	-2.34149	-2.06877	0.00623212	0.00343893
17356	3.84959	-3.12392	6.49	0.000344513	0.000107735
17359	2.41205	-4.05749	4.38501	0.00744741	0.00423117
17360	2.8618	-2.64923	5.24969	0.000344513	0.000107735
17372	-5.19605	-0.965217	-2.47697	0.00946662	0.00564155
17381	-2.86692	0.702537	-3.65694	0.000344513	0.000107735
17399	-4.17471	-2.00847	-1.98646	0.00677819	0.00378926
17404	0.283127	-4.03531	3.64606	0.0021193	0.000943613
17421	2.78161	-1.09813	3.80068	8.48633e-05	1.71999e-05
17425	-2.23584	0.450691	-2.77698	0.000344513	0.000107735
17437	-3.68562	-1.3981	-2.28752	0.00127127	0.000515996
17446	3.55584	0.142171	3.17596	1.57028e-05	1.70691e-06
17450	0.526149	2.37721	-1.86923	1.72635e-05	1.89506e-06
17489	-4.15256	-1.28609	-2.68783	0.00331069	0.00161679
17510	-4.37508	0.207072	-4.31593	0.00271733	0.00129282
17511	-1.30942	2.44443	-3.75385	8.48633e-05	1.71999e-05
17526	3.3331	1.4235	1.9096	0.00744741	0.00423117
17533	-1.63997	2.08375	-3.72382	0.00421431	0.00216188
17542	-2.18791	1.90215	-4.02235	0.00523078	0.00275334
17543	-1.81621	1.99514	-3.54315	0.00126259	0.00050294
17546	-3.43091	1.23577	-4.57427	0.00146213	0.000601687
17550	-4.32554	2.86609	-7.0534	0.000344513	0.000107735
17558	0.756683	-3.76535	4.60799	0.000221052	5.16676e-05
17576	-2.88686	1.47103	-4.14909	0.0024795	0.00113519
17583	-3.13105	-1.81073	-1.64931	0.00812167	0.00474036
17584	0.526481	2.95328	-2.31831	0.000344513	0.000107735
17603	-1.03586	-2.73654	2.0805	0.00829157	0.00484618
17604	1.34781	3.23935	-1.65017	0.000982446	0.000369831
17614	-0.361701	2.71896	-3.21603	0.00148935	0.000615676
17620	-4.1645	-2.5148	-1.88283	0.00437332	0.00227038
[truncated: 247 more rows]

## Sheet: 018
dmr_id	median1	median2	median_change	padj	pval
1	0.18918	2.77628	-1.96312	0.00570035	0.00451305
9	0.842971	-2.6234	3.75935	2.23035e-06	7.39602e-07
13	-0.943987	1.03374	-1.6317	4.32038e-05	1.98276e-05
19	-1.22688	-3.17146	2.57076	0.000170725	9.10478e-05
27	-0.670953	1.44308	-2.58937	4.21397e-08	6.65468e-09
29	-2.78638	0.245957	-2.70189	1.72623e-06	4.7655e-07
32	1.19902	2.64501	-1.41103	5.34314e-05	2.53262e-05
42	0.17731	-3.65874	4.59648	2.26466e-05	9.72166e-06
45	0.60548	1.95718	-1.54462	2.10151e-05	8.93724e-06
60	1.33985	-0.456958	1.58137	0.0058987	0.0046812
61	0.286581	-0.655657	1.84046	0.00380922	0.00291403
96	-1.31224	-4.68598	3.60654	4.21188e-07	9.98203e-08
104	-1.05609	0.431823	-1.67538	0.000537067	0.000328998
106	0.386081	-4.5322	5.02051	1.97681e-31	3.25668e-34
107	1.76194	2.97807	-1.83309	0.00125099	0.000857939
110	2.24903	-4.40707	6.46744	4.18973e-09	4.387e-10
115	0.398807	-3.63172	3.86683	2.10954e-06	5.92398e-07
117	0.652137	-2.21876	2.45311	3.13597e-05	1.3982e-05
123	-0.146034	-4.04068	4.17661	2.23035e-06	7.39602e-07
124	1.3779	-4.03297	5.13936	4.17267e-06	1.4792e-06
133	-3.32134	2.13269	-4.45147	1.22967e-05	4.8359e-06
135	-2.40762	1.1007	-3.14419	2.11617e-08	2.64459e-09
136	-0.741879	2.52	-3.18283	6.17075e-07	1.4973e-07
142	0.681283	-2.93231	3.20788	7.76423e-06	2.95841e-06
143	0.96088	-3.50625	5.34019	2.23035e-06	7.39602e-07
146	2.45559	-3.15671	5.35984	2.23035e-06	7.39602e-07
147	0.89632	-3.63969	3.71525	1.67784e-12	6.43653e-14
150	-1.12202	-4.18233	2.71124	3.45666e-08	5.23096e-09
151	-1.39585	-4.19775	2.56837	2.23035e-06	7.39602e-07
152	-1.11488	-4.26175	3.26035	3.05646e-05	1.35605e-05
153	1.12392	-0.139171	1.47941	0.000235529	0.000130819
166	-4.66999	1.00368	-5.50555	2.29139e-08	3.32734e-09
168	0.278485	-3.57197	3.53222	9.93306e-09	1.14315e-09
169	-1.10422	-3.79556	2.6249	0.000454002	0.000274392
175	-0.93017	-4.15119	2.83941	3.55407e-08	5.41182e-09
176	-4.91177	-3.25397	-1.78395	9.76134e-05	4.86988e-05
179	2.2388	-2.01891	3.6782	2.23217e-07	4.98547e-08
182	-1.37838	0.902483	-2.53826	6.87819e-05	3.32821e-05
187	-0.3269	2.19885	-2.27973	4.58861e-06	1.65445e-06
199	-0.68977	-2.79347	2.28986	3.24348e-06	1.11907e-06
209	-1.01689	0.209691	-1.88137	0.000163292	8.68536e-05
230	-4.45809	-0.666204	-2.44321	0.00722753	0.00585993
263	1.87781	-2.89955	4.05755	0.00342776	0.0025928
277	3.4522	0.739876	3.06247	1.85509e-19	1.22246e-21
287	-0.690244	1.04175	-1.73199	0.0024983	0.00182978
291	-3.63452	-1.16244	-1.73716	9.76134e-05	4.95534e-05
292	-0.13902	-3.26138	2.77706	0.000774659	0.000495534
293	0.396686	-4.89082	5.51495	2.29139e-08	3.32734e-09
299	-1.97946	-3.98305	1.85142	4.4161e-06	1.58497e-06
303	1.08446	-2.47468	2.77904	0.00293714	0.00218437
306	-1.16696	-4.06023	2.9837	1.68352e-05	6.9298e-06
308	-0.120895	-1.99184	2.62942	0.000208901	0.000114947
315	-0.212911	-2.10293	2.0194	2.18588e-09	2.20697e-10
336	-1.64224	1.17344	-2.74256	0.000293038	0.000167312
339	-0.496482	-3.40875	1.87855	0.00438939	0.00339354
344	1.28197	-2.39566	3.34767	1.23104e-06	3.22752e-07
345	-1.21543	2.072	-3.08628	9.29768e-05	4.62367e-05
357	-3.1371	-0.80761	-2.23091	0.00380922	0.00291403
359	0.116764	-3.79438	3.69866	0.000204987	0.000112745
360	0.112	-2.86255	4.10737	2.23217e-07	4.98547e-08
363	-0.846132	1.09091	-1.94328	0.000136633	7.17414e-05
381	1.5363	-3.45468	4.83617	2.29139e-08	3.32734e-09
386	-3.36221	1.32853	-4.72397	2.23035e-06	7.39602e-07
389	-0.297746	-4.57058	4.46111	4.69126e-07	1.11954e-07
395	-0.819686	1.91086	-2.48366	2.10954e-06	5.98256e-07
405	3.40028	-0.946347	4.26641	2.80626e-08	4.18727e-09
406	-0.171904	-3.22401	1.9986	6.77219e-08	1.11084e-08
412	0.106995	-4.09785	3.823	2.18588e-09	2.20382e-10
418	1.26056	-1.3999	3.14351	7.9338e-07	1.99419e-07
419	1.12673	-3.81674	5.39485	4.18973e-09	4.40765e-10
420	-0.84047	-4.44706	4.25376	2.97154e-12	1.20988e-13
427	-0.462304	1.07939	-1.4769	0.0090405	0.00748517
431	1.35721	-0.82251	1.94836	6.40763e-05	3.06131e-05
434	0.178253	-2.95761	2.7838	2.29139e-08	3.0206e-09
437	0.0643486	1.96603	-1.78898	1.04516e-11	4.55057e-13
439	0.501182	-2.71698	3.347	6.68347e-17	8.96583e-19
440	0.0215433	-4.1168	3.62064	8.12979e-14	2.02814e-15
452	0.239969	1.64358	-1.41387	0.000163292	8.68536e-05
454	2.44546	0.571194	1.87427	0.00465562	0.00363662
467	-0.0112355	1.53767	-1.58145	4.74948e-05	2.21881e-05
469	-0.701595	1.77148	-2.51789	0.00993729	0.00829316
472	-0.180645	1.36414	-1.73141	0.000188446	0.000101454
478	-0.467616	-1.76055	1.69566	8.31497e-05	4.07431e-05
484	-1.62787	-4.457	2.96174	2.09505e-05	8.87523e-06
487	-1.00101	-3.79672	3.09055	2.23035e-06	7.39602e-07
488	-2.78257	-3.99737	1.45958	0.00713922	0.00576985
495	-0.00644054	2.07371	-2.09775	3.26168e-05	1.47002e-05
496	-1.23327	1.21165	-1.96197	0.00993729	0.00829316
505	0.570039	3.21339	-1.99077	0.000546951	0.000337516
513	0.0370475	2.6116	-2.46112	2.30591e-05	9.92045e-06
514	1.69176	0.260927	1.41554	9.13886e-05	4.53179e-05
524	-1.37528	-3.61152	1.66936	0.00158868	0.00111458
531	-1.21052	1.40335	-2.34553	1.41101e-05	5.68852e-06
536	1.40043	2.98581	-1.46458	4.74948e-05	2.21881e-05
543	0.116925	-3.18239	2.95229	4.21188e-07	9.97093e-08
550	-0.0639103	-3.37182	3.63608	2.29139e-08	3.32734e-09
551	-0.0816467	-4.47112	4.38103	3.75217e-11	2.04872e-12
552	0.65783	-3.95294	2.98909	0.00542884	0.00426999
557	-1.51982	0.648992	-2.32463	0.00232601	0.00167676
560	-1.40418	0.985866	-1.93752	0.000988812	0.00065348
562	-0.0745258	2.03239	-1.98916	1.294e-05	5.17722e-06
563	-2.0667	1.63797	-3.74931	2.23035e-06	7.39602e-07
564	0.571784	-3.73646	3.63193	3.43594e-09	3.57422e-10
566	0.0541355	-3.8613	3.94277	2.29139e-08	3.32734e-09
575	-1.7837	1.39087	-3.24679	0.000235529	0.000130819
576	0.191071	-2.57688	3.52936	2.23035e-06	7.39602e-07
577	3.53257	-2.99332	5.09891	2.23217e-07	4.98547e-08
593	-4.39858	-2.59749	-1.58572	0.00823199	0.00671501
596	1.26675	-4.38963	5.10546	1.97274e-09	1.74107e-10
597	1.40089	-5.10588	6.62779	2.23035e-06	7.39602e-07
598	0.869916	-4.26605	5.29374	2.23035e-06	7.39602e-07
602	-4.43553	-1.48169	-2.54638	8.68963e-08	1.47656e-08
610	0.178751	-3.30313	3.9641	2.00157e-10	1.45089e-11
612	3.10042	-0.703667	3.46879	2.23035e-06	7.39602e-07
614	-3.3727	-0.969166	-2.20261	0.00201126	0.00144279
618	-0.105009	2.15411	-1.87628	0.00329414	0.0024863
619	0.616407	2.29048	-1.72328	0.000917753	0.000595492
620	4.01522	-2.98395	6.99916	0.00329414	0.0024863
628	-4.74504	-2.23911	-2.17452	2.09505e-05	8.87523e-06
630	-1.42461	0.752358	-1.89808	1.68352e-05	6.9298e-06
638	0.402131	1.69058	-1.84536	4.32038e-05	1.98276e-05
645	0.375251	2.25768	-1.731	2.23035e-06	6.48832e-07
646	2.12792	-0.48407	2.3803	0.00175247	0.00123816
647	-1.19746	-3.29044	1.91793	0.000546951	0.000337516
652	-3.60256	0.24703	-3.94272	2.10489e-07	3.99281e-08
657	-0.398308	1.42556	-1.78485	2.10489e-07	3.99281e-08
659	-1.10899	1.17332	-2.14681	3.56554e-06	1.2411e-06
678	-2.44983	0.658147	-2.86857	3.45666e-08	5.23096e-09
679	-0.0306816	1.60932	-1.87307	1.68352e-05	6.89758e-06
687	0.053419	2.39478	-1.92402	0.000202884	0.000111445
692	0.273929	2.24162	-2.15726	0.00200096	0.00143261
699	0.302168	1.4279	-1.78972	0.00180154	0.00127452
708	2.26539	-0.552641	2.46289	9.76134e-05	4.95534e-05
709	-3.89045	1.48917	-4.98843	2.23217e-07	4.98547e-08
713	-0.981546	-4.39088	2.5194	0.000250257	0.000139647
732	-3.96276	-2.27407	-1.69998	0.00265088	0.00195712
736	-3.24157	0.804338	-4.76908	1.03269e-06	2.67103e-07
761	2.88091	-2.16261	4.38918	1.42679e-16	2.18266e-18
764	-1.7831	-0.457534	-1.77945	0.00691126	0.00555959
766	-3.71116	-1.42391	-2.4086	2.91113e-06	9.97552e-07
817	-2.07983	-3.93349	1.68436	0.000994556	0.000662413
822	-4.22935	-2.21098	-1.99557	5.03011e-05	2.36175e-05
828	-1.19855	0.701858	-1.94231	0.000448478	0.000267039
830	-1.38014	2.10839	-3.22829	4.21397e-08	6.61147e-09
839	0.187307	2.16376	-2.18581	1.07786e-07	1.8848e-08
840	-0.949459	-4.29452	4.38502	2.25958e-07	5.08391e-08
844	-3.58435	2.43178	-4.93042	1.8275e-11	9.50526e-13
850	2.85357	0.468713	1.63435	0.000595534	0.00037128
852	-2.70217	-4.60433	2.21749	2.23035e-06	7.39602e-07
855	-0.421092	1.17668	-2.12329	6.87819e-05	3.32821e-05
861	0.42975	-2.72304	3.58755	0.000315049	0.000180695
878	-3.73242	0.976654	-4.44972	7.9538e-08	1.33094e-08
886	-1.91399	-4.62055	2.35059	0.000988755	0.000646216
887	1.89498	-0.622748	1.85997	0.00117321	0.000794384
888	-1.62177	2.1357	-3.01206	0.00383598	0.00293679
895	0.368737	-4.24267	3.90087	0.000276573	0.00015713
910	-0.288478	1.473	-2.31335	0.000988755	0.000646216
915	1.25352	2.26148	-1.56626	0.00158868	0.00111458
917	-0.186045	-3.96282	3.81902	2.09184e-08	2.57973e-09
926	-2.70786	1.6655	-3.83259	1.294e-05	5.17722e-06
951	-0.943528	-4.41554	3.2135	2.09505e-05	8.87523e-06
958	-2.62392	0.162559	-2.60059	8.16446e-13	2.53638e-14
964	-1.80216	0.901042	-1.98207	0.00312814	0.00234923
965	2.4754	0.233541	2.15892	0.00117321	0.000794384
970	-0.732262	-3.83225	2.94714	6.86465e-07	1.68022e-07
993	-2.31699	0.010224	-2.99097	5.34314e-05	2.53262e-05
999	-1.55759	-4.14502	2.91367	0.000988812	0.000656027
1004	0.0712983	2.37202	-2.40411	0.000256617	0.000144222
1018	1.30294	3.49457	-1.57808	0.00279882	0.00207754
1025	-4.42026	0.148589	-4.08135	2.00157e-10	1.45089e-11
1034	3.22788	-0.679291	3.69375	2.23217e-07	4.98547e-08
1039	-1.75397	-4.13148	2.77565	0.000163292	8.68536e-05
1042	-1.44432	1.85454	-3.71329	0.000276573	0.000156664
1043	-4.84538	-3.86229	-1.67214	0.00344073	0.00260423
1045	-4.4872	-1.54255	-2.60584	0.000325345	0.000186677
1049	1.65202	-0.205336	1.82833	0.000668653	0.000421272
1059	1.69242	-1.90316	3.50486	0.00993729	0.00829316
1064	-4.01832	-0.28141	-3.41642	1.36493e-08	1.61903e-09
1066	0.667756	-1.19397	2.77639	0.000163292	8.68536e-05
1069	2.78184	-2.0508	4.7982	2.09184e-08	2.57973e-09
1074	0.0766631	3.27986	-2.82958	6.87819e-05	3.32821e-05
1075	0.582046	2.84997	-2.32913	4.43599e-06	1.59733e-06
1076	-1.55355	0.817731	-2.54502	2.10954e-06	5.96796e-07
1078	-1.22448	2.0651	-3.39685	2.29139e-08	3.32734e-09
1080	1.03494	2.14986	-1.68595	0.00465562	0.00363662
1084	-1.29699	1.57404	-2.68579	0.000256617	0.000144222
1089	3.1009	1.31079	1.42606	0.00279882	0.00207754
1091	-4.42405	-1.46344	-1.89605	0.000166197	8.85548e-05
1095	-3.74412	-1.62739	-2.71262	1.36579e-07	2.45899e-08
1097	-0.0498578	-3.01939	2.79282	2.23035e-06	7.39602e-07
1098	-3.42446	-1.12425	-2.20957	1.68352e-05	6.89758e-06
1099	-4.19446	1.31432	-5.11404	1.62669e-12	6.20201e-14
1100	-4.12974	-0.00161807	-3.75926	4.74948e-05	2.21881e-05
1101	-2.94351	2.75305	-5.76993	1.40458e-13	4.03292e-15
1112	0.495706	-4.62274	3.74384	2.23776e-06	7.4311e-07
1117	0.562744	2.46924	-1.70484	2.03193e-06	5.67162e-07
1118	-1.20025	1.37816	-2.8142	9.76134e-05	4.95534e-05
1132	-4.15216	1.45778	-5.10608	1.01074e-18	9.03929e-21
1138	1.36451	-0.411545	1.8523	0.00131087	0.000904561
1148	1.57152	-3.4588	3.84524	9.15106e-08	1.57005e-08
1153	-4.3055	-1.38294	-3.18433	2.23035e-06	6.48832e-07
1154	-2.35962	1.66148	-4.09319	2.23035e-06	7.39602e-07
1156	-0.52686	2.09118	-2.55697	6.46709e-07	1.58139e-07
1169	-0.56408	1.37557	-1.78678	0.000148643	7.85371e-05
1191	-0.688656	2.78196	-3.017	2.23217e-07	4.98547e-08
1194	-1.68913	0.704024	-1.86715	0.00640714	0.00511335
1197	-2.01533	1.43783	-3.69543	2.29139e-08	3.32734e-09
1213	-0.0542189	2.07021	-2.24556	2.37625e-06	7.94135e-07
1215	-2.00451	0.982408	-3.37387	3.51034e-07	8.22026e-08
1233	0.729959	2.64545	-2.18251	0.000136633	7.17414e-05
1235	-0.70267	1.5912	-2.05147	0.000112217	5.73101e-05
1238	0.603469	-4.8721	5.13613	1.48874e-05	6.03693e-06
1239	-1.43431	1.82189	-2.83588	2.00157e-10	1.30277e-11
1242	0.189934	2.35071	-1.97908	0.000595534	0.00037128
1246	0.575489	2.15447	-1.57898	0.00691126	0.00555959
1273	-4.14713	-2.49038	-1.73342	9.13886e-05	4.53179e-05
1277	-2.04876	1.37713	-3.57963	0.00034453	0.000201172
1278	0.32124	2.04007	-2.50678	0.000136633	7.17414e-05
1279	0.154271	2.39123	-2.23696	3.05646e-05	1.35233e-05
1281	1.8891	-3.43956	4.56657	2.23217e-07	4.98547e-08
1282	1.00124	-3.42599	3.55837	1.96946e-05	8.1635e-06
1286	-1.2317	2.17784	-2.99332	0.000454002	0.000274392
1291	0.046362	2.61834	-3.3235	0.000132718	6.88419e-05
1299	1.29817	2.74878	-1.45114	0.000988812	0.000656027
1301	-1.35221	-4.01568	1.98115	0.000274455	0.000154765
1310	0.19548	2.17815	-1.48571	0.00227141	0.0016358
1324	-1.03364	1.40228	-2.09969	9.29768e-05	4.62367e-05
1342	-1.86416	-3.62627	1.78225	2.23035e-06	7.39602e-07
1343	-0.433204	-2.91853	1.66398	4.74948e-05	2.21881e-05
1348	-0.701644	-2.65227	1.84209	0.000274619	0.000155115
1349	-2.04063	1.09344	-2.28266	0.000274455	0.000154765
1350	1.88966	-0.20101	1.68223	0.00380922	0.00291451
1353	-1.22113	-3.46732	2.1786	0.000235529	0.000130819
1369	-2.53065	0.599688	-2.61079	2.23035e-06	7.39602e-07
1393	-0.407014	-1.69755	1.54586	0.000822101	0.000530525
1397	0.675295	-0.907065	2.0953	0.000480184	0.000291908
1427	-0.575988	-4.58157	3.62172	0.000361351	0.00021278
1429	-2.50636	2.16029	-4.25186	2.29139e-08	3.32734e-09
1439	-1.88666	0.911151	-2.69227	0.000188446	0.000102805
1442	1.77598	-1.34231	2.15749	0.000191986	0.000104962
1448	-2.61142	-0.54139	-2.07003	0.0014107	0.000977097
1462	3.80681	1.33412	2.07642	0.00529918	0.00416177
1470	-2.1515	-4.40815	2.23178	0.00034453	0.000201172
1472	1.91571	-1.79059	2.39015	0.00100052	0.000667073
1493	-2.00208	-3.74845	1.84642	5.07077e-06	1.84381e-06
1498	3.63944	-0.116827	3.76724	2.74382e-07	6.32195e-08
1501	3.01097	1.444	2.39897	0.00167846	0.0011827
1507	0.308976	-2.51546	2.56049	0.00713042	0.005761
1512	0.547056	-1.02717	2.7702	0.00623071	0.00496521
1513	-0.679158	-3.31382	2.26149	0.00140434	0.000971368
1523	-4.56043	-1.20182	-3.0973	5.34314e-05	2.53262e-05
1531	-1.84856	0.535433	-2.94088	1.68352e-05	6.9298e-06
1550	-0.117109	1.74472	-2.01281	1.31694e-05	5.2938e-06
1570	-0.469604	1.44739	-2.17782	0.00200096	0.00143302
1572	-0.763194	0.742325	-1.57171	0.00962663	0.00799538
1578	-1.03641	-3.64871	1.74054	0.00034453	0.000200037
1580	-0.706863	-2.86279	2.10846	5.60351e-07	1.3412e-07
1585	0.0515886	-2.91152	2.85008	1.09662e-18	1.00655e-20
1600	-0.571898	1.35505	-1.91197	7.76423e-06	2.95841e-06
1610	-0.365079	2.00198	-1.724	0.00383598	0.00293679
1612	-0.0376196	1.57278	-2.07738	6.17075e-07	1.4973e-07
1613	-0.544396	1.94814	-2.02805	0.000595534	0.00037128
1628	0.298308	2.04917	-2.19237	0.00342776	0.0025928
1632	-1.16931	-4.38218	2.85684	2.29139e-08	3.3236e-09
1640	-0.566549	-2.96261	1.48343	0.00963884	0.00800779
1653	-0.875574	-3.6233	2.74773	6.99273e-05	3.40009e-05
1675	0.216902	-3.43978	3.80243	1.62669e-12	6.20201e-14
1680	-0.169862	-3.835	2.77654	0.000988812	0.000656027
1700	1.87595	-1.4183	3.17693	1.67676e-06	4.62501e-07
1701	0.990176	-1.14375	2.13393	0.00238954	0.00172931
1728	-4.70504	-3.03032	-1.81626	0.000811162	0.000523275
1740	3.2101	-0.782684	3.55684	4.32667e-09	4.62298e-10
1748	0.0713868	-1.53519	2.69781	0.000235529	0.000130819
1756	0.646614	-0.740176	1.57087	0.000454002	0.000274392
1772	2.08563	-1.44512	3.1251	3.05646e-05	1.35605e-05
1810	0.227746	-4.03877	4.31369	3.52732e-11	1.90105e-12
1815	2.19466	-1.4026	3.83862	6.99273e-05	3.40009e-05
1818	-0.55826	-3.34657	1.69204	7.10462e-06	2.64354e-06
1830	3.17101	-3.21321	5.8787	2.00157e-10	1.45089e-11
1837	-0.512024	-2.27745	1.60276	0.00255019	0.00187498
1844	-4.20129	-1.03089	-2.52503	8.97544e-05	4.42329e-05
1855	2.18654	0.471641	2.16392	2.09505e-05	8.87523e-06
1859	-4.07081	-1.78919	-2.22621	6.15943e-06	2.2759e-06
1861	2.21497	0.492592	1.65516	0.0024983	0.00182978
1868	-4.23703	-2.37328	-1.89038	4.28228e-05	1.96326e-05
1885	-2.42128	-3.4124	1.50558	0.00442535	0.00342551
1887	-1.28526	-2.89559	1.72038	0.00034453	0.000201172
1915	-3.32066	0.265863	-3.49919	9.76134e-05	4.95534e-05
1923	-3.9868	-1.77073	-2.62975	3.46077e-05	1.56463e-05
1927	0.742932	-1.39435	2.35234	2.23217e-07	4.98547e-08
1929	-0.606549	-4.43568	3.95192	2.00157e-10	1.45089e-11
1936	-1.3861	-4.21209	2.70335	1.01106e-07	1.75848e-08
1937	0.868424	-2.64434	3.38705	2.09505e-05	8.87523e-06
1938	0.0357034	-4.12223	4.14583	1.90097e-20	1.029e-22
1941	2.62021	-4.3681	4.56269	2.23217e-07	4.98547e-08
1942	0.358189	-4.41981	4.07433	1.77507e-10	1.09453e-11
1954	0.53296	-0.770936	2.84621	0.00895968	0.00740982
1955	0.73207	2.54899	-1.77429	0.000329709	0.000190034
1957	-0.587992	-4.11232	3.90174	0.000148179	7.8222e-05
1958	-1.91111	-3.8681	1.69959	0.000116091	5.97259e-05
1960	-1.143	-3.76366	2.19182	5.6897e-06	2.07957e-06
1966	-0.463186	1.9794	-2.3076	0.00034453	0.000201172
1969	-1.74483	-4.53939	1.87769	0.000170725	9.10478e-05
1978	-3.30822	-0.740082	-2.5643	0.00017114	9.13096e-05
1983	2.23734	-3.36348	4.32052	5.52539e-06	2.01562e-06
1985	-3.23473	-0.870458	-1.49857	0.00130424	0.000897833
2006	-3.41197	0.343447	-3.7498	2.23035e-06	7.39602e-07
2011	0.7048	2.35231	-1.60757	3.95071e-08	6.07158e-09
2015	0.709317	-2.11966	2.49997	0.000595534	0.00037128
2017	-0.44886	-2.20558	1.92041	0.00313277	0.00235418
2022	0.174853	-3.92462	4.18194	6.29664e-07	1.53526e-07
2024	1.44151	-0.480543	3.32834	0.000368766	0.00021784
2031	0.66507	-3.08889	3.86061	2.85422e-05	1.24541e-05
2032	-4.30864	-3.01369	-1.75627	0.00034453	0.000200707
2033	2.05578	-1.30839	2.67268	1.29029e-05	5.10917e-06
2039	1.85344	0.0445007	2.26671	2.10954e-06	5.96796e-07
2043	-2.11703	-3.53319	1.47158	0.00124818	0.000848669
2044	3.38798	-3.0983	5.96644	1.8275e-11	9.50526e-13
2045	0.470291	-4.20049	4.20012	4.17267e-06	1.49184e-06
2046	3.63108	-4.04874	8.07397	2.23035e-06	7.39602e-07
2047	2.66147	-3.73826	6.92263	2.23035e-06	7.39602e-07
2048	0.925963	-2.60216	4.09183	6.17075e-07	1.4973e-07
2058	3.52065	-3.58096	6.35295	1.64702e-11	7.44241e-13
2067	-5.08551	1.99459	-6.69987	2.23035e-06	7.39602e-07
2068	-4.65204	-2.3675	-2.87328	0.000112217	5.73101e-05
2080	3.02405	-0.190305	2.85883	3.05646e-05	1.35233e-05
2086	0.42941	-5.26896	5.7228	1.14421e-15	2.07353e-17
2100	-1.85731	-4.81197	3.71999	4.43599e-06	1.59733e-06
2101	1.28534	-3.23262	3.86269	1.294e-05	5.17722e-06
2102	-0.42192	-4.69031	4.23811	2.18588e-09	2.20382e-10
2103	0.39504	-2.63501	2.84558	4.74948e-05	2.21881e-05
2107	-1.67289	-4.49528	3.05263	0.000796599	0.000511256
2119	2.16484	-1.48574	3.03281	5.04619e-11	2.79091e-12
2121	1.59338	-1.74738	2.83717	9.76134e-05	4.88686e-05
2124	0.896412	-0.947709	1.7161	0.00131087	0.000904561
2127	-3.28703	3.33021	-5.41183	2.23217e-07	4.98547e-08
2133	-0.527058	-3.99967	3.10261	2.10151e-05	8.93724e-06
2134	0.798501	-3.4283	4.05757	0.000188446	0.000102805
2135	-0.0390527	-3.75393	3.10778	1.27207e-07	2.25733e-08
2137	-0.244015	-4.31571	3.85044	7.21032e-10	5.80356e-11
2141	3.53266	-2.62084	5.99399	2.23035e-06	7.39602e-07
2150	3.37157	-0.244652	3.46945	1.91067e-06	5.31516e-07
2162	-3.25173	-0.781519	-2.25101	0.00718249	0.0058183
2165	-0.603021	-4.37657	3.5284	2.29139e-08	3.32734e-09
2166	1.76535	-4.3113	5.73205	2.00157e-10	1.45089e-11
2167	2.15114	-3.56583	5.87023	2.23217e-07	4.98547e-08
2168	1.69554	-3.25462	3.511	3.24516e-08	4.8727e-09
2169	2.29753	-2.88325	5.57155	2.18588e-09	2.20382e-10
2170	1.64224	-1.50985	3.09035	2.23217e-07	4.98547e-08
2171	2.18364	-0.505734	2.36391	8.75451e-07	2.22932e-07
2172	-0.612618	-4.70632	3.00079	9.29768e-05	4.62367e-05
2174	-0.00357168	-4.02885	2.73385	0.000448905	0.000268667
2183	0.21576	-2.42796	2.57663	0.0024983	0.00182978
2184	-1.72117	-3.99671	2.0326	3.31395e-07	7.72137e-08
2185	1.83093	-3.92607	5.23854	8.42673e-18	9.71781e-20
2199	3.15362	0.302831	2.81669	2.23035e-06	7.39602e-07
2211	-2.63302	-5.05224	1.74338	0.00133478	0.000921373
2217	-3.289	-0.878425	-2.1609	0.000608029	0.000379499
2227	0.261061	-3.45785	3.78186	1.30389e-07	2.32914e-08
2239	-3.66327	-0.149901	-3.49799	2.23035e-06	7.39602e-07
2241	1.17148	3.88754	-2.4194	0.00301845	0.00224768
2243	2.69577	-0.317882	2.94315	1.01145e-05	3.92059e-06
2257	-1.63116	-3.92468	1.65674	0.00990073	0.00823002
2268	2.12509	-1.46617	3.87629	1.294e-05	5.17722e-06
2269	-3.6665	-2.25709	-1.41042	5.48215e-05	2.5998e-05
2276	1.69642	-2.87624	4.01864	7.9338e-07	1.99419e-07
2278	-1.26423	-3.55326	2.50862	2.10489e-07	3.99281e-08
2289	2.40192	-1.95999	4.12457	9.23615e-09	1.05643e-09
2310	-0.162291	-3.61676	2.18529	5.95427e-08	9.64119e-09
2316	0.878488	-1.22008	2.2865	0.00125099	0.000857939
2317	-3.63714	-0.511761	-3.23896	4.21188e-07	9.97093e-08
2330	-0.87766	-3.36675	2.74681	1.21381e-08	1.41121e-09
2334	-0.143351	-2.99532	2.02125	1.22459e-08	1.4295e-09
2338	0.51326	-0.735295	1.62313	0.00713042	0.005761
2339	-2.82172	-3.66983	1.87735	0.00182237	0.00129097
2340	0.572635	3.02644	-2.39554	1.0349e-05	4.02608e-06
2341	-0.258272	-3.68014	1.76227	0.000179399	9.58851e-05
2342	1.99334	-1.52353	4.5254	0.00234058	0.00168837
2364	0.0238093	-4.06214	3.16252	1.25013e-06	3.28641e-07
2365	1.72686	-1.52925	3.398	2.77765e-06	9.47239e-07
2366	1.68525	-1.85746	3.56988	2.09505e-05	8.87523e-06
2367	-2.31108	-3.87085	1.57221	1.68352e-05	6.9298e-06
2368	2.45949	-1.55393	3.83823	5.84873e-15	1.18379e-16
2369	3.22206	-3.17531	5.77834	2.23217e-07	4.98547e-08
2370	0.587016	-2.52427	2.70371	2.23035e-06	7.39602e-07
2371	0.0645282	-3.08018	2.8772	1.71359e-11	7.86419e-13
2372	1.92306	-2.4511	4.33374	1.40458e-13	3.82621e-15
2381	1.47801	-2.5836	3.56786	3.46077e-05	1.56463e-05
2386	-3.39532	-1.62437	-1.87909	6.15943e-06	2.2759e-06
2404	-0.660293	2.06098	-1.74182	0.00810322	0.00660615
2406	1.49756	3.13408	-1.70322	1.96946e-05	8.17635e-06
2407	1.29391	-0.849352	1.56844	0.000329709	0.000190034
2422	-4.89967	-0.824795	-3.9595	7.21032e-10	5.7987e-11
2438	-4.24321	-2.42584	-1.992	9.76134e-05	4.95534e-05
2440	-4.03284	-1.90051	-2.0313	0.000240039	0.000133719
2446	-1.56337	2.97949	-3.29682	5.34314e-05	2.53262e-05
2461	-0.208595	-1.74451	1.67787	0.00167846	0.0011827
2462	-1.16617	2.10642	-3.06855	0.00380922	0.00291403
2463	2.11414	-3.38966	5.40357	1.64702e-11	7.44241e-13
2464	0.633996	-2.16701	3.15543	8.26937e-06	3.16645e-06
2465	-0.123784	-3.9968	2.43178	1.55925e-06	4.22382e-07
2468	-1.91571	1.45939	-3.2864	6.87819e-05	3.32821e-05
2471	-1.0426	1.33918	-2.7022	2.23035e-06	7.39602e-07
2473	-3.54126	1.05303	-4.02199	2.77765e-06	9.47239e-07
2474	-1.53329	2.21728	-3.60842	2.23035e-06	7.39602e-07
2475	-1.49703	1.67482	-3.59102	2.09505e-05	8.87523e-06
2477	-1.09229	1.19818	-2.64352	2.13399e-05	9.10047e-06
2478	-2.09981	0.046044	-1.95911	0.000988812	0.000648726
2481	-3.18907	0.173137	-2.30301	0.000988812	0.000656027
2483	-1.22677	0.281592	-2.03766	2.23217e-07	4.98547e-08
2485	-0.95288	-3.93942	2.57544	5.40733e-11	3.00337e-12
2493	0.112242	2.76059	-2.67531	0.000256617	0.000144222
2516	-3.10612	-1.27406	-1.82549	0.00810322	0.00660615
2521	3.4256	-0.456079	4.18043	2.09505e-05	8.87523e-06
2522	-4.45764	-2.82117	-1.7613	0.00542884	0.00426675
2525	-1.92316	-0.394528	-2.80349	2.10954e-06	5.98256e-07
2583	-3.53061	1.43562	-4.66907	2.23035e-06	7.39602e-07
2585	0.194497	-2.10998	2.70653	3.26168e-05	1.47002e-05
2586	-3.88764	-2.53481	-1.87255	0.000315049	0.000180695
2597	1.78541	-2.21851	2.86659	0.000546951	0.000337516
2599	3.09294	0.361779	2.62013	0.00125099	0.000857939
2615	-1.84157	-4.48621	1.85496	0.000668653	0.000421272
2618	-2.98145	1.72742	-4.51049	2.25958e-07	5.08391e-08
2619	-0.135025	-4.60856	4.25149	2.23035e-06	7.39602e-07
2620	1.70339	-4.29344	5.15389	0.000774659	0.000495534
2621	-0.662571	-3.87631	3.56063	0.00200096	0.00143261
2622	-0.855424	2.37682	-3.43843	0.000668653	0.000421272
2624	0.361144	2.94106	-2.8039	0.00175247	0.00123816
2625	-1.94114	-4.27489	1.92432	0.00111468	0.000747408
2626	-1.5323	1.6328	-3.13798	1.294e-05	5.17722e-06
2627	-1.38774	2.77643	-3.83766	2.29139e-08	3.32734e-09
2629	0.330178	2.19553	-2.25106	0.000193821	0.000106239
2630	-0.0584228	-2.00469	2.48234	0.000361351	0.00021278
2631	1.74698	-2.08134	4.03914	7.9538e-08	1.33094e-08
2643	-1.38705	2.624	-3.95608	4.07999e-05	1.86764e-05
2645	0.635879	2.95631	-2.34766	7.76423e-06	2.95841e-06
2646	-2.08805	0.994904	-2.95402	5.34314e-05	2.53262e-05
2651	-0.00695141	2.39797	-2.64823	4.66366e-06	1.69029e-06
2652	0.014495	1.79712	-1.93232	1.05761e-05	4.12193e-06
2653	-4.66265	-2.90126	-1.48754	0.0019888	0.00141168
2680	-4.18686	-1.14338	-2.77092	4.74948e-05	2.21881e-05
2683	-4.25262	-2.65006	-1.43223	0.000988812	0.00065348
2686	0.0509077	-3.89605	3.36137	5.35496e-13	1.61317e-14
2688	-1.35038	1.5643	-2.63546	1.294e-05	5.17722e-06
2690	-3.29398	0.0275135	-2.96331	0.00175247	0.00123816
2703	0.378787	-1.54528	1.99314	0.00442535	0.00342551
2710	-3.6533	-1.83082	-1.7546	0.000448905	0.000268667
2720	1.62605	0.0538799	2.0159	0.00647305	0.00517662
2723	-0.462576	2.61452	-3.39556	5.34314e-05	2.53262e-05
2735	1.62196	0.0194087	1.79231	4.43599e-06	1.59733e-06
2738	-0.965476	2.30513	-3.35444	4.17267e-06	1.4792e-06
2739	-1.20605	1.71345	-2.66131	1.67676e-06	4.62501e-07
2747	2.67914	-1.39941	3.46317	8.63833e-06	3.34026e-06
2756	0.483103	2.04814	-1.60067	6.15943e-06	2.2759e-06
2769	-1.46243	-3.62779	2.82892	8.33041e-07	2.10172e-07
2776	-0.350558	-4.04549	3.78079	2.26743e-14	5.22965e-16
2777	-5.0352	-2.0356	-2.12616	0.000493003	0.00030067
2782	-0.145291	-3.22631	3.28096	2.23217e-07	4.98547e-08
2783	0.432585	-3.63796	4.57194	2.67012e-08	3.94642e-09
2787	-3.8081	-1.81548	-2.35592	2.61454e-07	5.93795e-08
2793	1.09646	-1.81077	2.92336	2.25853e-05	9.64754e-06
2799	-4.32764	-2.01589	-2.31175	3.05225e-06	1.04735e-06
2810	-4.75142	-2.59377	-2.10562	1.27786e-06	3.36834e-07
2821	1.02978	-3.77091	4.70805	7.47914e-17	1.09133e-18
2823	1.25651	-3.37498	3.4558	7.76423e-06	2.95651e-06
2827	0.15481	-4.07976	4.00685	2.18588e-09	2.20382e-10
2828	0.804086	-2.69278	4.13108	2.09505e-05	8.87523e-06
2829	-0.198779	-4.79843	4.53173	7.40693e-14	1.83038e-15
2851	-0.513475	-3.67774	2.88632	3.33216e-08	5.02686e-09
2886	1.36532	-4.18701	5.03088	2.29139e-08	3.32734e-09
2894	0.527787	3.01893	-2.52439	0.000774659	0.000495534
2895	-3.39885	-1.26789	-1.97581	7.9338e-07	1.99419e-07
2908	-4.14115	2.5374	-4.96846	3.25716e-06	1.12609e-06
2932	-0.571667	1.49824	-2.0699	0.000774659	0.000495534
2935	1.02204	3.07273	-1.92176	7.04779e-05	3.43847e-05
2936	0.0206894	-4.75005	4.23768	1.79294e-14	4.05089e-16
2937	-0.428766	-3.63964	2.86886	1.81126e-06	5.03436e-07
2947	2.5165	3.93057	-2.27981	0.000668653	0.000421272
2953	1.93892	-2.70287	4.47926	6.606e-08	1.07742e-08
2958	0.7778	-4.60526	4.69981	1.40458e-13	4.03292e-15
2982	2.92238	-0.97339	2.90036	8.75451e-07	2.22932e-07
2983	3.22341	-2.30905	4.41816	7.99416e-08	1.33957e-08
2985	-1.09988	2.61855	-4.83912	2.13399e-05	9.10047e-06
2991	0.235998	2.23063	-1.86322	2.74382e-07	6.32195e-08
2995	-2.56905	-3.77977	1.50494	0.00387337	0.00298365
2996	-3.60231	-1.9146	-1.86151	0.00251473	0.00184418
2997	3.1325	-2.07837	5.24346	8.1394e-11	4.7507e-12
3014	2.67333	-1.68894	4.27789	2.23217e-07	4.38486e-08
3015	1.57107	-1.2928	3.03198	0.000188446	0.000102805
3016	0.468805	-2.1907	2.71407	0.000293038	0.000167312
3026	-1.76333	-3.89506	1.9258	0.00200096	0.00143302
3030	2.12512	-1.22969	3.76822	7.9338e-07	1.99419e-07
3038	-1.06899	-4.45242	2.90027	1.0349e-05	4.02608e-06
3039	3.08672	-1.82507	4.18908	8.97535e-07	2.28978e-07
3050	1.63379	-1.81684	3.74824	1.31525e-06	3.51951e-07
3076	-0.0931036	2.20862	-1.75101	0.00034453	0.000201172
3077	-2.13552	-4.33846	2.1931	0.00263454	0.00194382
3082	0.126686	-4.67047	4.77561	2.33667e-18	2.25473e-20
3083	-0.682096	-2.6645	1.51552	2.56461e-05	1.11119e-05
3090	-0.157186	-2.05043	1.84611	1.69146e-07	3.11302e-08
3100	-3.19565	0.402859	-3.63534	0.000188446	0.000101454
3103	3.51861	0.226961	3.14796	2.23035e-06	7.39602e-07
3107	-3.22209	1.30295	-3.85832	2.23035e-06	7.39602e-07
3116	0.322716	-4.41143	4.32567	5.79172e-12	2.4808e-13
3121	-1.1374	0.77813	-1.81953	1.68352e-05	6.89758e-06
3136	-4.32506	-1.65089	-1.98795	0.00691126	0.00555959
3137	2.81049	-2.40253	3.29045	3.12796e-05	1.39061e-05
3146	-3.86446	-1.92271	-1.94945	0.000596794	0.000372206
3149	0.36009	-3.94874	4.05467	3.05646e-05	1.35233e-05
3152	-0.0864554	-4.60089	4.38976	2.18588e-09	2.20382e-10
3159	-4.43062	-0.966025	-2.1161	1.22967e-05	4.8359e-06
3163	1.86889	-4.2269	4.95418	2.18588e-09	2.20382e-10
3179	-1.33203	-4.94353	2.64513	0.00100052	0.000667562
3194	-1.45447	2.77349	-3.88157	0.000148179	7.8222e-05
3195	1.53981	-1.80202	2.80834	0.00117321	0.000794384
3196	-1.00429	2.102	-3.39247	2.77765e-06	9.47239e-07
3197	1.51512	-2.9224	5.43646	2.23217e-07	4.29746e-08
3199	-0.577962	1.92889	-2.36261	0.00309028	0.00231643
3201	-0.147609	1.91333	-1.61543	0.00948413	0.00786587
3209	-0.116866	-5.32618	4.56192	3.13597e-05	1.40524e-05
3210	0.589677	-3.52196	3.36411	0.000988812	0.00065348
3211	-1.92184	0.536962	-3.0987	0.000132718	6.88419e-05
3223	0.216483	-4.05071	3.9007	1.83153e-12	7.11233e-14
3225	-1.14844	-3.9629	2.72958	2.1426e-08	2.70284e-09
3228	2.64445	-0.823689	3.48451	1.01106e-07	1.75848e-08
3235	1.03169	-2.86598	4.30868	2.23217e-07	4.98547e-08
3249	-5.22297	-3.71727	-1.741	0.00086129	0.000557234
3266	-2.48192	1.05018	-3.10485	4.02607e-05	1.83063e-05
3271	-1.45837	2.02266	-3.03216	0.000537067	0.000328532
3274	-0.0725699	2.4836	-2.81482	4.07999e-05	1.86764e-05
3279	2.23432	-3.18212	5.29366	7.9538e-08	1.33094e-08
3280	-3.46948	0.101497	-4.048	4.69126e-07	1.11954e-07
3281	1.10616	-2.89316	4.06929	0.000407989	0.00024197
3282	0.271703	-3.22025	2.9768	2.23217e-07	4.98547e-08
3292	-1.91186	-4.29769	1.78424	1.93684e-05	8.00447e-06
3296	0.57624	-2.49307	3.08111	2.23035e-06	7.39602e-07
3300	1.5513	-2.6882	3.90521	1.10707e-09	9.28015e-11
3303	1.96529	-3.22305	5.51218	3.05646e-05	1.35605e-05
3326	1.67554	3.1555	-1.47997	0.00309028	0.00231643
3333	0.286264	3.18809	-2.51819	0.0024983	0.00182978
3344	-4.50236	-2.49533	-1.89328	0.000108899	5.54364e-05
3350	-2.19236	-4.24773	2.0862	2.29139e-08	3.13014e-09
3351	-0.744634	-2.7766	2.29338	4.74948e-05	2.21881e-05
3352	-0.148712	-3.97387	3.41858	1.8275e-11	9.50526e-13
3357	0.203702	-3.57934	2.88127	1.27723e-08	1.49395e-09
3362	1.85094	-2.08392	2.59889	4.64122e-05	2.13263e-05
3364	1.82977	-1.63888	3.2514	0.000276573	0.000156664
3369	4.00365	-3.98852	7.98773	2.29139e-08	3.32734e-09
3370	2.64644	-2.52128	4.94356	4.21397e-08	6.65468e-09
3374	1.53952	-3.75641	4.76734	0.00142148	0.000986239
3380	-1.38069	2.06451	-3.6075	1.50808e-07	2.73648e-08
3383	0.0427836	-2.01509	2.78883	0.00993729	0.00829316
3384	2.04548	-0.0696781	1.74655	0.000178507	9.53242e-05
3391	-0.531275	-2.36392	1.94929	0.00265088	0.00195712
3395	-3.25025	-0.578323	-2.79244	8.29502e-05	4.06259e-05
3402	-0.497387	2.95721	-3.14301	0.00034453	0.000201172
3408	-4.39555	-2.08591	-2.17082	2.18588e-09	2.20382e-10
3413	0.0610096	-2.63975	2.70075	0.00399508	0.00308022
3420	-0.597573	2.41489	-2.27872	0.000301332	0.000172332
3421	-4.31476	-2.52288	-1.80836	0.00380922	0.00291403
3422	2.31583	-1.82776	3.64652	2.23217e-07	4.98547e-08
3425	-1.50638	-3.64657	1.79002	5.08458e-08	8.17315e-09
3435	-3.2792	0.198884	-3.02956	0.00251508	0.00184858
3436	-0.0145988	2.70594	-2.94446	2.62923e-09	2.67316e-10
3442	-0.072868	-3.73511	3.17433	5.06336e-14	1.20358e-15
3455	-4.17283	-0.188965	-3.98387	6.27379e-12	2.70206e-13
3466	0.707133	-3.1489	4.16824	2.38466e-08	3.47401e-09
3471	-0.490135	2.34382	-2.56823	0.00131087	0.000904561
3478	-3.40771	-0.426844	-2.8089	2.23217e-07	4.98547e-08
3480	0.753694	2.50832	-1.55489	0.0024983	0.00182978
3481	0.00155711	2.73646	-2.8514	0.0024983	0.00182978
3486	-2.52731	1.43652	-4.31938	2.23035e-06	7.39602e-07
3499	-2.20145	1.64972	-4.1658	3.26168e-05	1.47002e-05
3508	-3.43078	1.29185	-2.97052	0.00257333	0.00189381
3512	-2.66593	-0.276417	-1.84806	4.92477e-05	2.30186e-05
3516	2.89627	2.08996	2.20756	0.00529918	0.00416177
3538	-3.09142	-0.00163115	-2.9913	9.43817e-05	4.7002e-05
3540	-4.50167	-2.46912	-1.98853	7.77582e-10	6.36852e-11
3556	0.675607	-3.84723	2.48234	0.00317983	0.00239179
3559	3.65824	1.60321	2.22333	0.000256617	0.000144222
3586	-2.99272	-1.40242	-1.64024	0.000133139	6.90921e-05
3595	1.00028	2.87541	-1.87513	0.00125099	0.000857939
3596	-5.17207	-3.27532	-1.775	0.00034453	0.000201172
3598	0.999449	2.76469	-1.43899	0.00826945	0.00681174
3614	2.27738	-0.576639	3.08913	6.87819e-05	3.32821e-05
3620	0.928392	2.24102	-1.46097	0.000116585	6.00377e-05
3621	-3.97408	-1.44153	-2.36846	0.000329709	0.000190034
3627	-0.446421	1.53119	-1.94249	9.76134e-05	4.95534e-05
3640	-1.57164	-3.7632	1.73194	0.00093303	0.000606942
3643	1.29268	-1.11737	2.47105	2.74081e-09	2.81241e-10
3660	-0.29298	-4.50999	3.1969	4.64122e-05	2.13765e-05
3670	-1.20576	1.29595	-2.16757	0.000433425	0.000257974
3671	2.45919	-0.103688	2.63103	1.67676e-06	4.59497e-07
3672	0.0554556	-2.28081	2.44136	2.05369e-07	3.82801e-08
3675	0.148352	-4.17594	3.74729	2.38187e-07	5.37589e-08
3676	0.116942	-2.87302	3.61412	2.15928e-07	4.11121e-08
3677	-0.324426	-3.39563	2.89824	7.9338e-07	1.99419e-07
3679	2.57896	-2.40335	3.34686	5.65072e-06	2.064e-06
3680	0.819238	-2.91609	3.60629	2.23217e-07	4.98547e-08
3681	-0.117776	-4.5509	3.69758	1.10707e-09	9.30157e-11
3682	-1.00558	-2.89905	1.94451	0.00182113	0.00128924
3688	-4.35101	-0.0644242	-2.83085	0.00201126	0.00144513
3689	0.0925984	-1.70882	1.99141	6.87819e-05	3.32821e-05
3695	3.41164	1.49899	2.12937	0.0024983	0.00182978
3701	0.147671	-4.36883	4.50237	4.28766e-09	4.55104e-10
3708	-4.06771	-2.38035	-1.40119	0.00200234	0.00143495
3716	3.09607	1.28005	1.6676	0.00251473	0.00184418
3718	-0.0836542	-4.68191	5.25674	5.04619e-11	2.79091e-12
3719	2.40869	-0.429609	3.10443	2.23035e-06	7.39602e-07
3728	-0.0719683	-3.85234	2.95031	0.000988812	0.000656027
3737	-3.95478	-0.394742	-3.96356	2.29139e-08	3.32734e-09
3749	1.91706	-4.35599	6.4918	2.29139e-08	3.32734e-09
3755	-0.969809	-3.89297	3.14122	4.74948e-05	2.20016e-05
3757	-1.17602	-4.02103	2.79701	9.76134e-05	4.95534e-05
3760	3.13477	-0.222979	1.8156	0.00691126	0.00555959
3786	0.561241	2.58025	-1.59095	9.76134e-05	4.95534e-05
3788	0.204745	2.54809	-1.96768	0.000256617	0.000144222
3790	2.95393	1.05988	2.86614	0.00453864	0.00351854
3792	-1.25224	2.1727	-3.42494	0.00117321	0.000794384
3795	3.22387	-3.20308	5.1559	0.00167348	0.00117644
3797	-4.75261	-2.35013	-2.46879	2.97154e-12	1.20988e-13
3798	0.474179	-3.20638	2.60382	1.30212e-06	3.44454e-07
3807	3.55648	-0.138088	3.13861	5.68041e-07	1.36496e-07
3817	-3.45322	2.70613	-4.65479	2.56461e-05	1.11119e-05
3818	-5.01354	-1.38686	-3.28763	4.74948e-05	2.21881e-05
3824	2.21543	-0.48031	2.50506	0.00823353	0.00674339
3827	-3.84675	-2.63225	-1.4816	0.00465562	0.00363662
3841	-0.173215	-3.99685	3.5922	2.74051e-06	9.24898e-07
3848	0.276081	1.739	-1.73299	2.10151e-05	8.93724e-06
3849	-0.471203	-1.83824	1.63972	0.00570035	0.00450077
3856	-4.01907	-1.47937	-2.3869	2.08493e-05	8.66062e-06
3858	2.80475	-0.767603	3.52181	2.10489e-07	3.99281e-08
3860	2.01949	-0.213024	2.22231	0.000454002	0.000274392
3862	0.601458	2.83184	-1.54845	0.000668653	0.000421272
3863	1.89094	-2.18347	3.5734	0.000315049	0.000180695
3866	-0.30837	-4.61972	5.40268	2.63122e-07	5.9944e-08
3869	0.947364	2.64545	-1.77846	2.25958e-07	5.08391e-08
3880	0.790165	2.63898	-1.45295	2.11661e-05	9.01141e-06
3889	-0.204561	1.51707	-1.75229	0.000116091	5.97259e-05
3912	-0.380946	-2.49412	2.37139	2.26466e-05	9.72166e-06
3915	0.364764	2.56099	-2.13229	0.00713042	0.00576106
3934	0.559254	-2.25432	3.02147	1.93144e-07	3.59105e-08
3938	-3.39811	0.757932	-4.30479	0.000361351	0.00021278
3940	-4.11677	-2.46818	-1.76637	1.42582e-07	2.57044e-08
3942	0.429446	-0.817125	1.43504	0.00117321	0.000794384
3949	-3.52408	1.99326	-4.4575	0.000988812	0.000656027
3961	-4.16548	-1.54731	-2.82966	7.76423e-06	2.95841e-06
3963	-0.177647	-4.01365	3.29434	3.23261e-07	7.52424e-08
3973	-0.363687	-3.9777	3.95098	2.23035e-06	7.39602e-07
3974	-1.44257	-3.71432	3.22464	8.44796e-09	9.58324e-10
3975	-0.605963	-3.87499	3.44459	2.74382e-07	6.32195e-08
3989	-0.198688	-2.47201	1.78804	0.000988812	0.000656027
3997	1.30076	-2.92665	3.87849	3.19873e-12	1.31743e-13
4025	-1.07828	-2.36602	1.45056	0.00158868	0.00111458
4026	3.09454	-1.25641	5.01218	2.23217e-07	4.98547e-08
4027	3.93902	-3.28122	6.51774	2.18588e-09	2.20382e-10
4028	-0.270933	-4.27761	4.00667	2.23217e-07	4.98547e-08
4030	2.92362	-2.04087	4.96329	2.23217e-07	4.98547e-08
4033	1.33261	-3.58862	5.35087	2.23035e-06	7.39602e-07
4034	3.56838	-3.78687	6.50479	2.23035e-06	7.39602e-07
4035	1.22804	-3.89306	4.92931	2.00157e-10	1.45089e-11
4042	-1.76505	1.17143	-2.93822	2.40361e-05	1.03464e-05
4053	3.05538	1.43237	1.88708	0.000163536	8.70215e-05
4056	-4.39049	-0.082464	-4.6121	2.11617e-08	2.64459e-09
4062	-0.287287	-3.88309	2.91428	0.00201126	0.00144279
4063	-2.07281	-4.14064	1.64059	1.36003e-06	3.64573e-07
4064	-3.32124	-0.114669	-3.16719	2.88323e-06	9.87313e-07
4065	-1.6653	2.14862	-4.08606	1.10435e-10	6.65368e-12
4079	-1.06151	-3.46515	2.47588	1.24307e-05	4.9091e-06
4080	0.984819	-1.77546	2.18213	2.29121e-05	9.85184e-06
4081	2.69903	-2.95124	5.48276	2.23035e-06	7.39602e-07
4082	-0.746618	-2.96073	2.44184	0.00279882	0.00207754
4087	3.52349	-1.08854	4.11785	2.23776e-06	7.4311e-07
4091	-3.15408	-4.92131	1.83695	0.000256617	0.000144222
4092	-4.74161	-2.32027	-2.48947	2.29139e-08	3.32734e-09
4100	2.22507	-4.2589	6.50883	2.00157e-10	1.40968e-11
4104	-3.19302	-0.531914	-2.66881	1.99737e-08	2.44441e-09
4117	-0.103716	-4.30116	4.21641	2.18588e-09	2.20382e-10
4122	0.228274	-4.18991	4.63568	8.75451e-07	2.22932e-07
4128	-0.690796	-3.71338	2.52126	3.24348e-06	1.11907e-06
4135	1.32536	-3.55824	4.69603	1.62669e-12	6.20201e-14
4154	-4.22319	-0.876602	-2.68163	1.14396e-12	3.63461e-14
4156	-3.14941	0.0160442	-2.90008	4.17267e-06	1.49564e-06
4158	-4.36802	2.71106	-6.7439	2.23035e-06	7.39602e-07
4169	-4.12121	-2.21988	-1.62307	0.00569094	0.00448418
4187	-1.6555	1.22461	-2.08629	0.00691126	0.00555959
4196	-0.742584	-3.47126	2.15817	2.72449e-05	1.18623e-05
4198	1.96898	-2.15588	3.54455	2.80626e-08	4.18727e-09
4207	2.29199	-1.79757	4.08957	2.18588e-09	2.20382e-10
4209	1.41793	2.67344	-1.45938	0.00034453	0.000201172
4212	0.286261	2.45414	-1.47165	0.00238954	0.00172931
4216	0.820662	-4.56423	5.53064	2.10954e-06	5.98256e-07
4218	-1.74746	1.88387	-2.44006	0.00453864	0.00351854
4219	1.0749	-2.17214	2.3431	1.0129e-06	2.59601e-07
4227	2.81471	1.85652	1.45877	0.000774659	0.000495534
4236	0.208458	-4.00527	4.21373	2.23217e-07	4.98547e-08
4239	0.244507	-4.40787	4.4464	2.18588e-09	2.20382e-10
4240	0.355001	-3.21747	2.59997	8.63833e-06	3.34026e-06
4242	-1.11062	-4.55559	3.79669	3.05646e-05	1.35605e-05
4245	-2.79817	0.471637	-3.12617	4.07999e-05	1.86764e-05
4247	0.858448	-3.98713	3.34303	0.00251508	0.00184858
4254	-1.69571	-3.4556	1.74331	0.00167846	0.0011827
4255	-0.553753	-2.07523	2.12644	0.0024983	0.00182978
4259	-1.94655	-0.363631	-1.62533	0.00279882	0.00207754
4264	3.21271	-3.49068	4.51802	2.15928e-07	4.11121e-08
4275	1.76668	2.95325	-1.47285	0.00329414	0.0024863
4293	2.75645	-1.91987	3.68791	0.000256617	0.000144222
4298	-4.15923	-0.844228	-3.29575	3.51034e-07	8.22026e-08
4310	0.449259	2.1674	-1.97611	0.00385968	0.00296311
4313	2.4059	-1.21095	2.71057	7.96071e-06	3.04452e-06
4317	0.426478	1.94721	-2.18174	0.00309028	0.00231643
4320	-0.827392	1.6314	-2.65092	9.76134e-05	4.95534e-05
4321	-0.137838	-3.7911	3.27004	0.000454002	0.000274392
4323	-0.195105	2.47112	-2.18077	4.74948e-05	2.21881e-05
4324	-0.999474	2.64425	-2.99117	4.07707e-05	1.85958e-05
4325	0.881245	2.35942	-1.41745	0.000235529	0.000130819
4326	0.559043	2.49197	-1.93073	0.0024983	0.00182978
4327	1.05928	2.31814	-1.66069	0.00279882	0.00207754
4328	-2.65946	-0.00664818	-2.85342	0.00329414	0.0024863
4334	-4.73493	-2.33408	-3.36303	1.22967e-05	4.8359e-06
4337	-0.52967	2.45629	-2.30855	0.000774659	0.000495534
4358	-2.61577	-0.0316994	-1.53053	0.00810322	0.00660615
4359	3.79502	-1.26712	4.1821	3.55482e-07	8.34116e-08
4360	-0.546241	2.20142	-3.46991	0.000595534	0.00037128
4361	0.310635	2.44539	-2.21604	9.76134e-05	4.95534e-05
4362	0.299879	1.59723	-1.41366	0.00309028	0.00231643
4365	-3.9287	2.50039	-5.9857	2.23217e-07	4.98547e-08
4371	0.386769	2.14649	-2.1688	0.000668653	0.000421272
4374	3.11746	0.135904	2.42203	0.000668653	0.000421272
4383	-2.57394	-0.0657695	-2.12878	0.00042146	0.000250456
4387	0.261225	-3.99797	3.65862	2.52613e-07	5.7193e-08
4390	1.90153	-3.54937	5.0563	1.67676e-06	4.62501e-07
4392	0.954426	2.47901	-1.8401	0.00158868	0.00111458
4414	-4.73355	-2.67027	-1.87982	0.000988812	0.000656027
4425	-0.247263	-3.87162	2.95451	2.23035e-06	7.39602e-07
4430	-0.742598	-4.02973	3.06309	2.68728e-06	9.05037e-07
4436	-1.026	-3.69471	2.53444	0.000297667	0.000170095
4442	-1.31795	-2.64846	1.4222	0.00200096	0.0014275
4454	-4.30661	-1.7001	-2.41213	4.64122e-05	2.13765e-05
4463	2.64499	1.2905	1.47311	3.13597e-05	1.40524e-05
4476	-0.513225	-3.48578	2.50286	0.00089171	0.000577964
4479	1.45291	-2.18567	3.08755	0.000493003	0.000300628
4487	0.753158	2.60729	-1.75323	0.000454038	0.000274945
4495	-0.930613	1.6708	-2.53844	2.74382e-07	6.32195e-08
4502	0.428931	-1.45825	1.51367	9.01828e-07	2.30286e-07
4522	0.411779	1.9523	-1.58187	0.000448905	0.000268667
4524	0.765701	-1.55744	2.01189	0.00089171	0.000577964
4528	-3.18801	0.0309462	-1.98024	0.0013538	0.000935139
4532	-3.62167	-1.8523	-2.10768	0.000594537	0.00036758
4533	1.41422	3.35279	-1.96799	6.87819e-05	3.32821e-05
4534	0.11208	-2.00805	1.89418	4.07707e-05	1.85585e-05
4536	1.06404	-0.899849	1.81868	0.00438939	0.00339354
4546	-3.71717	0.634098	-4.41827	3.77456e-10	2.85158e-11
4547	-4.7974	-3.37848	-1.69856	1.81049e-06	5.0237e-07
4557	2.24532	-1.03451	2.69088	0.00238954	0.00172931
4559	-0.623818	-3.98963	4.05158	0.000136633	7.17414e-05
4560	0.598241	3.06996	-2.47172	0.00034453	0.000201172
4561	3.1193	-0.365597	1.71397	0.000546951	0.000337516
4562	-0.109204	-3.38375	2.77189	1.43467e-12	4.65955e-14
4576	-0.875762	-3.95334	3.23074	0.000190873	0.000104264
4583	2.11474	-0.387107	2.22399	8.28627e-08	1.39632e-08
4585	-4.14641	0.462364	-3.84978	1.22967e-05	4.8359e-06
4596	2.44344	-1.41236	3.8215	0.000188446	0.000102805
4597	-0.918571	-3.58418	2.62866	0.00823353	0.00674339
4598	0.395775	-1.85556	1.73437	1.35918e-07	2.43751e-08
4599	-1.28665	-3.46303	2.15835	4.07707e-05	1.85958e-05
4600	-1.97288	-3.7138	1.54551	0.000582447	0.000359831
4602	1.20451	-2.55482	2.96126	0.000276573	0.00015713
4605	-0.521514	-2.51252	1.85761	0.000329709	0.000189424
4606	-0.442667	-2.54601	2.38292	0.00453864	0.00351854
4607	0.0649529	-4.19292	3.31218	1.67676e-06	4.62501e-07
4609	0.658196	-2.63866	3.3406	2.30601e-06	7.69575e-07
4624	0.526183	-2.73799	3.56874	1.33843e-05	5.38649e-06
4627	-0.205687	-4.36183	3.88765	1.01106e-07	1.75848e-08
4635	-0.089591	-4.40008	4.23918	1.79541e-07	3.317e-08
4640	-0.591877	1.99718	-2.47841	1.75777e-08	2.1305e-09
4659	0.224559	-4.90417	4.6971	1.11913e-12	3.52937e-14
4666	-1.71262	-4.0336	2.2164	4.74948e-05	2.21881e-05
4682	1.6231	-2.52373	4.01011	8.19003e-19	6.93907e-21
4700	4.32685	-0.328473	5.10248	2.23217e-07	4.98547e-08
4707	-0.404459	-4.77857	3.75426	2.23217e-07	4.98547e-08
4709	-0.133738	2.65555	-2.59368	1.11913e-12	3.52937e-14
4727	0.830884	-2.83568	2.91109	6.78642e-06	2.51875e-06
4728	-1.07602	-4.31348	3.21702	7.76423e-06	2.95841e-06
4729	2.48545	-3.57123	5.59839	2.23035e-06	7.39602e-07
4730	-0.484209	-3.23473	2.7297	2.92259e-08	4.38148e-09
4731	0.510829	-3.22168	2.79666	0.0012591	0.000865277
4738	-1.60276	-4.13029	2.7648	2.7603e-07	6.37291e-08
4742	-0.262812	1.54881	-1.49474	0.000595534	0.00037128
4743	-0.530093	2.37869	-3.70823	2.23217e-07	4.98547e-08
4748	-0.956115	-4.54223	3.35158	2.30601e-06	7.69575e-07
4749	-0.940392	-3.93101	2.56335	0.000988812	0.000656027
4750	-0.000936072	-2.67183	2.8656	2.29139e-08	3.32734e-09
4754	-1.03152	-2.33604	2.17229	0.00823353	0.00674339
4758	-0.746534	-4.49265	3.52613	0.000148179	7.8222e-05
4775	2.2075	-0.650249	2.19608	0.00461684	0.00358568
4790	-1.68834	0.521578	-1.65919	0.00647305	0.00517662
4792	2.772	0.361793	2.26484	5.76432e-06	2.1082e-06
4798	-0.867251	1.16297	-2.38215	0.000188446	0.000102805
4800	-1.47955	-4.61047	2.51959	1.73322e-08	2.09668e-09
4801	0.216032	-4.18898	2.75074	3.40464e-06	1.17948e-06
4806	0.10332	-2.66285	2.56814	0.00129233	0.000889334
4808	1.23226	3.39179	-2.22331	6.2229e-05	2.96865e-05
4809	1.56681	3.58947	-2.07751	0.000135848	7.06894e-05
4811	-4.17058	-2.74472	-1.75206	0.00615766	0.00489307
4846	2.14148	-1.78128	2.64866	0.00823353	0.00674339
4847	1.27107	-4.15383	5.5904	2.18588e-09	2.20382e-10
4851	-0.20203	-2.83682	3.16375	1.10591e-06	2.87344e-07
4863	0.102663	1.93113	-1.8494	6.09103e-06	2.24346e-06
4869	-3.68826	-0.635615	-2.1687	8.78632e-05	4.32389e-05
4893	0.363961	-3.85534	4.51139	1.54752e-12	5.09891e-14
4897	-1.46634	-3.27005	1.41303	0.00757468	0.00614496
4912	-0.044199	-4.43565	2.58536	5.03011e-05	2.36175e-05
4918	-0.378782	-2.39805	1.43373	0.00114433	0.000769977
4922	-1.45421	1.58412	-2.64405	2.56335e-05	1.10823e-05
4923	1.37219	-4.07515	4.80537	6.1944e-07	1.50742e-07
4924	0.480931	-4.84463	4.51814	9.76134e-05	4.95534e-05
4926	-1.19883	2.35888	-3.08983	2.23035e-06	7.39602e-07
4927	3.12581	1.50791	1.61377	2.09505e-05	8.87523e-06
4932	0.486568	-2.68071	2.96743	2.23217e-07	4.98547e-08
4940	-1.5341	0.649998	-1.42508	0.000537067	0.000328998
4962	-0.923029	-4.36837	3.08211	3.43594e-09	3.57422e-10
4965	-4.29548	-0.986779	-3.44418	0.000234386	0.000129467
4968	2.45172	-3.2211	4.23159	2.18588e-09	2.20382e-10
4973	-4.49502	-1.55116	-3.09867	0.000188446	0.000101454
4980	0.927476	2.62231	-1.66086	5.03011e-05	2.36175e-05
4981	-1.44459	2.14086	-3.4814	0.00823353	0.00674339
4982	-1.51811	2.22248	-3.42982	2.10954e-06	5.98256e-07
4984	1.14523	2.83713	-1.99713	9.76134e-05	4.95534e-05
4985	-0.303618	-2.48813	2.28678	0.000784829	0.000503332
4987	3.20093	0.828789	2.62173	1.30315e-08	1.54268e-09
4989	-0.138952	2.5794	-2.52452	0.00201126	0.00144513
4992	1.98464	-2.19295	4.36851	8.0001e-07	2.0165e-07
4993	2.19672	-4.17002	6.59632	2.11617e-08	2.64459e-09
4999	0.00491845	-2.06499	1.84363	0.000366687	0.000216525
5000	1.35362	-1.65797	2.65586	0.000204987	0.000112745
5001	1.34985	-4.53462	5.88447	8.63833e-06	3.34026e-06
5002	0.677979	-0.782914	1.51443	0.000454002	0.000274392
5003	1.41954	-2.77116	4.09165	2.29139e-08	3.32734e-09
5004	-0.317537	-3.29351	2.50338	4.75352e-17	5.81744e-19
5026	-2.21249	0.431779	-3.00238	4.17267e-06	1.4792e-06
5033	0.983002	-4.36339	5.35227	1.8275e-11	9.50526e-13
5034	0.386014	-2.50982	3.11093	0.000109916	5.59796e-05
5041	-0.10686	-3.54001	3.13088	7.76423e-06	2.95841e-06
5043	-1.55577	1.02868	-2.50551	1.05761e-05	4.12193e-06
5056	-4.51043	-1.78522	-1.76022	0.00810322	0.00660615
5064	0.033416	-2.61877	2.47668	6.48646e-06	2.40285e-06
5072	-1.70962	1.21455	-3.65053	0.000917753	0.000595492
5075	0.200366	-3.22164	2.89957	0.00713042	0.00576106
5084	-0.740272	-3.97953	3.50198	2.23035e-06	7.39602e-07
5085	-1.12813	-3.38085	2.57477	0.00140434	0.000971368
5086	-2.5975	2.1369	-4.67039	2.18588e-09	2.20382e-10
5091	-0.254558	2.68694	-2.23322	0.00125099	0.000857939
5108	-4.62938	-1.77753	-2.95092	1.80113e-07	3.33606e-08
5109	-4.58333	-1.98179	-2.25861	3.46077e-05	1.56463e-05
5119	-0.42082	-3.1403	2.60206	4.90139e-10	3.749e-11
5124	2.63824	-0.204852	3.04315	1.31525e-06	3.51951e-07
5127	-3.91394	-1.20875	-1.71916	0.00718249	0.00581834
5130	1.12322	-1.31604	2.3013	0.000188446	0.000102144
5139	-1.48052	0.253372	-1.9978	0.000493003	0.000300628
5140	0.800772	-1.67517	2.77447	2.00157e-10	1.45089e-11
5141	0.194458	-2.52637	3.37801	9.08709e-08	1.55265e-08
5144	3.40856	-2.74739	6.27964	2.23035e-06	7.39602e-07
5149	-0.0635685	-2.93639	2.44812	2.22777e-24	7.86458e-27
5150	1.80597	-3.23719	5.61202	2.23035e-06	7.39602e-07
5151	3.32072	-2.00279	4.68173	7.21032e-10	5.80356e-11
5152	3.14989	-1.54291	5.06473	2.00157e-10	1.45089e-11
5156	-3.43476	0.724864	-3.18974	0.000595534	0.00037128
5157	-4.48539	-3.18075	-1.41507	0.000493003	0.00030067
5160	-1.65692	-3.53008	2.12183	6.09103e-06	2.24346e-06
5165	-0.233218	-2.71001	1.82371	9.03161e-08	1.5368e-08
5168	-4.66372	-2.63406	-1.92726	0.00117321	0.000794384
5171	2.2197	-0.448763	2.79241	8.75451e-07	2.22932e-07
5184	2.41794	-2.508	4.28252	6.17075e-07	1.4973e-07
5185	-1.733	-3.45898	1.72075	0.00434973	0.00335981
5186	-0.795997	-2.86014	2.13697	2.27671e-06	7.57117e-07
5188	0.76638	-3.23757	3.48423	0.00465562	0.00363662
5190	0.169131	-1.64503	1.70203	3.56554e-06	1.2411e-06
5199	4.17856	-1.86523	5.85599	2.23217e-07	4.98547e-08
5201	2.1787	-2.6009	4.8233	2.29139e-08	3.32734e-09
5202	3.36108	-1.96659	5.34124	2.29139e-08	3.32734e-09
5203	3.75595	-3.42359	7.10926	2.29139e-08	3.32734e-09
5204	2.47615	-1.47373	3.58364	2.23035e-06	6.48832e-07
5212	3.28529	-2.05841	5.28928	2.23035e-06	7.39602e-07
5213	0.172827	-3.08027	3.89204	7.74073e-15	1.60316e-16
5214	0.623909	-4.73845	5.08516	2.23035e-06	7.39602e-07
5223	-0.269194	-4.32004	4.09653	2.11661e-05	9.01141e-06
5225	1.53848	-1.22355	2.21362	2.09505e-05	8.87523e-06
5226	2.06654	-0.665082	2.41078	2.23217e-07	4.98547e-08
5227	3.17025	-3.36106	6.40216	1.8275e-11	9.50526e-13
5228	0.944589	-3.36697	4.08224	4.17267e-06	1.49564e-06
5229	1.42838	-3.54327	3.90165	1.30876e-06	3.48983e-07
5230	1.97264	-3.45244	4.57395	1.47936e-12	4.8395e-14
5231	-0.453691	-4.19529	3.32069	3.52112e-05	1.59358e-05
5232	3.31487	-1.77783	5.12588	1.8275e-11	9.50526e-13
5233	-0.493053	-4.3935	3.50808	4.17267e-06	1.4792e-06
5234	1.7631	-4.01101	5.31456	6.09103e-06	2.24346e-06
5235	2.30208	-2.00858	4.31066	2.23035e-06	7.39602e-07
5236	1.87148	-1.95595	3.69695	1.15049e-09	9.74766e-11
5237	2.25747	-3.82161	5.19137	5.77643e-20	3.53465e-22
5238	4.42307	-4.37175	8.31344	6.35463e-18	7.02913e-20
5239	3.495	-4.1373	7.5515	2.29139e-08	3.32734e-09
5240	3.1415	-1.15375	4.37593	0.00125099	0.000857939
5241	2.01986	-1.28335	2.63454	0.000237495	0.000132246
5242	2.39679	-1.03267	3.53645	2.29139e-08	3.32734e-09
5243	0.545256	-1.55628	1.80122	3.05646e-05	1.35811e-05
5244	1.0272	-0.554808	1.68573	2.89206e-10	2.17126e-11
5246	2.36784	-1.56167	3.76125	7.96071e-06	3.04452e-06
5247	1.55999	-3.1392	4.03827	4.18973e-09	4.40765e-10
5248	0.118819	-1.86855	2.64598	0.000595534	0.00037128
5249	1.54262	-3.06332	4.25186	2.23217e-07	4.98547e-08
5250	2.12847	-2.7214	4.04105	2.23035e-06	7.39602e-07
5251	1.26091	-2.60846	3.70106	1.7292e-06	4.7778e-07
5252	-0.0626065	-3.59156	3.48539	9.82044e-11	5.77809e-12
5263	1.67767	3.17064	-1.51116	0.00125099	0.000857939
5265	-2.77836	-4.67154	2.12531	1.19843e-07	2.10691e-08
5272	2.96506	-3.02222	5.86205	1.30876e-06	3.48983e-07
5273	2.32349	-2.0545	4.11861	2.29139e-08	3.32734e-09
5274	-2.25129	2.14149	-5.27744	2.23217e-07	4.98547e-08
5276	-3.79146	1.00307	-4.31288	0.00175247	0.00123816
5280	-5.01556	-3.34738	-1.5748	0.000675347	0.000425648
5283	1.13917	-0.997959	2.33778	0.000142172	7.47498e-05
5291	1.05854	-3.54886	3.47586	4.40385e-08	6.99599e-09
5293	-2.09062	-0.00339883	-1.87133	0.000745046	0.000472032
5305	2.38347	-4.42808	5.85188	6.606e-08	1.07742e-08
5307	0.098527	2.79074	-2.69222	0.00570035	0.00451305
5308	-0.654689	2.1267	-2.02575	9.76134e-05	4.89183e-05
5309	1.23652	-4.58671	5.63143	2.23035e-06	7.39602e-07
5313	3.01513	-3.78549	6.80062	4.17267e-06	1.49564e-06
5322	1.892	-0.404722	1.75369	0.000248523	0.000138621
5325	2.53247	-2.37019	4.53144	5.79172e-12	2.4808e-13
5326	1.71084	-1.05707	2.87059	6.99273e-05	3.40009e-05
5327	2.38438	-2.10965	5.13025	7.47914e-17	1.09133e-18
5328	-2.05394	-3.8254	2.26443	0.000595534	0.00037128
5344	-4.62786	-0.21215	-4.07973	1.34812e-10	8.18579e-12
5345	-4.90558	-2.30211	-2.69537	2.08903e-09	1.85352e-10
5346	3.30485	-0.726485	4.18878	0.000188446	0.000102805
5352	-3.84308	-0.222304	-4.00809	0.00114433	0.000769977
5370	-1.76339	0.202796	-1.91147	5.5146e-05	2.61778e-05
5373	0.811698	-4.92767	5.65294	1.62669e-12	6.20201e-14
5376	-1.4612	-3.85233	2.76673	3.90099e-05	1.77284e-05
5383	3.81137	-0.221769	4.3691	0.000188446	0.000102805
5386	-0.465619	1.84894	-2.1167	0.000385238	0.000227661
5392	2.3189	-0.747846	2.28393	0.00787126	0.00640223
5394	-5.06346	-0.960344	-4.32731	2.29139e-08	3.32734e-09
5400	0.0456341	-2.83775	2.66545	1.89744e-05	7.83715e-06
5406	-4.61678	-2.74624	-1.78498	5.68041e-07	1.36496e-07
5421	1.11525	-3.35885	4.56696	2.23217e-07	4.98547e-08
5430	-0.981877	1.83027	-2.1232	3.90894e-06	1.36707e-06
5432	-1.71305	-3.70295	2.45512	1.67676e-06	4.62501e-07
5440	-2.75146	-1.20371	-1.53442	0.00123006	0.000835766
5441	0.0397456	1.90658	-1.50691	0.00309028	0.00231643
5444	1.06965	-1.96648	3.08654	1.22967e-05	4.8359e-06
5445	0.591716	-3.21159	3.15616	0.00329414	0.0024863
5457	-4.59317	-1.96351	-2.68841	2.62537e-09	2.66306e-10
5468	-0.850628	0.951455	-2.09728	0.000680694	0.000429499
5471	2.77346	0.337328	2.82209	2.23035e-06	7.39602e-07
5484	-1.19199	-3.42847	2.31513	2.26466e-05	9.72166e-06
5485	2.07694	-3.06575	5.36808	5.48685e-19	4.51965e-21
5486	1.32383	-3.10133	4.51562	2.29139e-08	3.32734e-09
5487	2.90197	-1.13289	4.07561	2.23217e-07	4.98547e-08
5488	2.44585	-2.23476	4.16616	2.23035e-06	7.39602e-07
5489	1.3114	-3.3153	4.83501	2.00157e-10	1.45089e-11
5490	2.58809	-3.83135	6.17252	9.71025e-16	1.69112e-17
5491	-1.91774	-4.02936	2.33055	0.000595534	0.00037128
5493	1.07233	-2.72058	3.543	2.18588e-09	2.20382e-10
5495	-3.30208	-2.58419	-1.46053	0.00585812	0.00464486
5497	-3.70112	1.46544	-5.64312	1.8275e-11	9.50526e-13
5513	1.29675	-2.30619	2.38349	0.000116585	6.00622e-05
5514	1.63068	-3.22264	4.36668	2.1426e-08	2.70284e-09
5522	-4.74711	-1.54521	-3.64375	7.76423e-06	2.95841e-06
5525	-1.47891	1.66266	-2.41317	0.000276573	0.00015713
5535	2.30303	-1.80186	3.914	0.00279882	0.00207754
5545	-3.06157	-0.641238	-2.58368	0.0024983	0.00182978
5546	-2.52642	1.23977	-3.13011	1.294e-05	5.17722e-06
5554	0.738333	2.38308	-1.85896	0.000120628	6.22017e-05
5557	2.53828	1.15322	1.42517	0.000190873	0.000104264
5562	0.564789	2.42431	-1.85952	0.000668653	0.000421272
5563	0.636568	2.2626	-1.64907	0.00823353	0.00674339
5566	-0.566695	-2.44473	1.86814	0.000188446	0.000102805
5572	-1.03024	1.90072	-3.0875	4.17267e-06	1.4792e-06
5576	0.255885	-4.87325	5.22478	1.62669e-12	6.20201e-14
5577	1.7458	-1.98598	3.97396	2.23035e-06	7.39602e-07
5578	3.83578	-1.59255	5.34303	2.29139e-08	3.32734e-09
5587	-0.0499749	-3.54046	2.37237	6.89413e-08	1.13415e-08
5593	-2.88545	0.647448	-3.77014	2.23035e-06	7.39602e-07
5619	-1.9095	2.67148	-4.87015	0.0024983	0.00182978
5634	2.65658	-0.426771	3.25714	2.09505e-05	8.87523e-06
5644	-2.07841	0.171057	-2.14963	6.87819e-05	3.32821e-05
5645	0.111198	-4.50937	4.62097	4.17267e-06	1.49564e-06
5651	-1.0263	1.36389	-2.25675	0.00465562	0.00363662
5658	1.55959	-1.4401	2.91288	0.000454038	0.000274945
5674	-1.39416	2.65743	-3.76718	0.00993729	0.00829316
5679	1.29182	2.41719	-1.55211	0.000190873	0.000104264
5681	-1.99942	1.78426	-3.77688	9.77397e-10	8.12006e-11
5685	0.985033	-1.10829	2.24333	0.00318015	0.00239353
5687	-1.99907	1.39959	-3.24576	0.00380922	0.00291403
5703	2.15923	-1.17003	3.33401	7.76423e-06	2.95841e-06
5706	-4.11612	0.454779	-4.8028	2.23035e-06	7.39602e-07
5708	-0.523108	-3.09029	3.32301	0.00034453	0.000200623
5719	0.826068	1.88113	-1.67685	3.26138e-06	1.12909e-06
5720	-0.867912	1.90192	-2.42525	0.00131087	0.000904561
5721	-0.438965	1.87635	-2.31531	8.26937e-06	3.16645e-06
5723	0.382842	2.27786	-1.5781	0.000454002	0.000274392
5728	0.370814	2.58459	-2.21377	0.000988812	0.000656027
5735	-1.6712	-3.91011	2.71345	0.0024983	0.00182978
5742	-0.55343	1.43986	-1.47949	0.00570035	0.00451305
5745	0.0627314	2.1211	-1.66936	0.00713042	0.00576106
5746	-0.60791	1.22104	-1.94077	9.76134e-05	4.95534e-05
5750	-0.662481	1.21774	-2.06731	0.0034828	0.00264263
5754	-1.13191	1.76208	-1.86871	0.000116091	5.97259e-05
5755	-2.07495	2.06864	-3.26535	0.000136633	7.17414e-05
5756	-1.97376	-4.54749	1.73247	4.67997e-08	7.50073e-09
5758	2.99437	-4.33373	7.36669	2.43609e-10	1.806e-11
5759	-1.03403	-4.24397	2.96829	4.17267e-06	1.4792e-06
5761	-0.0833454	-3.74315	3.44476	1.0892e-07	1.9072e-08
5763	-0.407689	1.85393	-2.1384	0.00380922	0.00291403
5764	0.87619	2.23572	-1.6627	0.000454002	0.000274392
5765	1.31997	-3.7267	4.83526	2.23035e-06	7.39602e-07
5766	-0.657876	3.08534	-4.11897	2.29139e-08	3.32734e-09
5769	0.906784	2.82566	-1.64664	0.000112217	5.73101e-05
5770	1.97326	-0.862515	2.12698	0.00125099	0.000857939
5771	-0.40677	-2.64008	2.10259	2.42455e-08	3.53783e-09
5772	0.487429	-2.18415	1.73688	0.000188446	0.000102144
5773	0.986701	-1.23522	2.45829	9.29768e-05	4.62367e-05
5774	-1.95003	2.0016	-4.25233	2.23035e-06	7.39602e-07
5775	-0.063663	2.20661	-2.27028	0.00826945	0.00681174
5777	-0.641895	1.06029	-1.95875	0.00125099	0.000857939
5779	0.236756	-3.60303	3.67747	2.23035e-06	7.39602e-07
5780	-1.54649	-3.62453	2.28322	7.76423e-06	2.95841e-06
5783	-3.35141	0.823364	-4.46719	2.23035e-06	7.39602e-07
5784	-2.80436	2.27159	-4.04879	0.000188446	0.000102805
5785	-0.356952	2.61462	-2.97561	2.23035e-06	7.39602e-07
5786	-0.294291	2.76131	-3.05561	0.000988755	0.000646216
5788	1.60139	-2.90397	3.91031	1.99737e-08	2.43988e-09
5800	0.331085	2.22841	-2.21482	4.21397e-08	6.65468e-09
5803	-4.09899	0.40236	-4.4414	7.72648e-06	2.88402e-06
5810	-4.35998	-1.09943	-3.26056	0.000116091	5.97259e-05
5819	2.75617	-5.01205	7.92326	1.8275e-11	9.50526e-13
5826	1.02371	-4.76828	5.61519	1.16952e-14	2.61483e-16
5827	-1.20119	-4.51025	3.40089	7.80337e-09	8.8153e-10
5828	-0.642424	2.09719	-3.13979	2.23035e-06	7.39602e-07
5829	-2.73104	2.28672	-4.77949	2.23035e-06	7.39602e-07
5842	0.273893	-3.5389	3.48562	2.23035e-06	7.39602e-07
5844	-2.77015	-4.05795	1.96746	0.000194221	0.000106504
5845	-0.700159	-4.39952	3.2273	3.02901e-12	1.2404e-13
5848	-0.357162	1.9804	-2.95195	3.26168e-05	1.47002e-05
5850	2.73257	-1.10226	4.27791	3.56554e-06	1.2411e-06
5855	0.0549181	2.84743	-2.52856	0.00201126	0.00144513
5857	1.14458	-4.49258	5.63716	4.69126e-07	1.11954e-07
5868	0.423026	-3.82097	3.85315	3.40566e-16	5.37018e-18
5869	-1.50105	-4.47809	2.71877	4.63238e-12	1.94061e-13
5870	-0.117284	1.67171	-1.58943	0.00380922	0.00291403
5876	0.441249	-4.62826	4.19417	5.54164e-08	8.94696e-09
5877	-0.166626	-3.88961	3.93534	1.69873e-13	4.99744e-15
5884	-4.55236	-0.681822	-3.55732	2.23217e-07	4.98547e-08
5887	-3.96732	-0.934792	-2.44844	2.85422e-05	1.24541e-05
5888	-1.8827	-4.49863	2.59823	1.24465e-10	7.52823e-12
5889	-1.75068	2.42978	-3.48444	2.23035e-06	7.39602e-07
5894	1.6147	-3.74816	4.15497	2.77765e-06	9.47239e-07
5897	-0.567799	-3.95794	3.22026	7.9538e-08	1.32756e-08
5898	-3.50338	-0.561163	-3.01072	2.23217e-07	4.98547e-08
5899	0.630846	-2.42555	3.38319	9.50804e-08	1.64024e-08
5909	0.0382752	-3.03727	2.98683	2.2949e-07	5.16879e-08
5911	0.46448	-4.08038	3.96009	2.86271e-08	4.28497e-09
5912	1.15569	-3.66866	3.34056	0.000244082	0.000136086
5913	-0.471125	-4.50158	4.17452	2.00157e-10	1.45089e-11
5914	1.14051	-2.74786	4.65883	1.16474e-06	3.02903e-07
5916	0.497896	-4.57739	4.17552	1.64624e-16	2.55712e-18
5918	-0.662423	-2.20412	1.59454	0.00993729	0.00829316
5919	0.289764	-2.33657	2.78493	1.22967e-05	4.8359e-06
5925	-3.19278	-4.986	2.01705	0.00117321	0.000794384
5930	-0.774455	2.2568	-2.52819	0.000136633	7.17414e-05
5933	-0.702463	-3.05607	3.01096	2.23217e-07	4.98547e-08
5934	0.457984	-2.34959	2.47201	0.000775369	0.000496353
5935	0.267456	-4.01976	3.85319	2.11617e-08	2.64459e-09
5942	-1.38012	1.81405	-2.69505	1.46123e-05	5.90131e-06
5943	-3.98909	-1.04281	-2.38314	6.78642e-06	2.51875e-06
5945	0.635939	-2.84626	2.66595	0.000360374	0.000210508
5952	-3.0975	3.00775	-6.21757	2.23217e-07	4.98547e-08
5953	-1.05754	-4.22442	2.6024	8.37398e-08	1.41307e-08
5956	-2.00415	-3.9855	1.42857	1.29029e-05	5.11075e-06
5958	-1.65018	-3.70914	1.40223	0.00173208	0.0012209
5964	-1.80172	-3.85909	2.17821	3.59958e-11	1.94847e-12
5967	0.415208	-2.2781	2.79309	0.00175247	0.00123816
5976	-3.95508	-1.2155	-2.30615	0.000740701	0.000468756
5977	-4.52922	1.36785	-5.89707	1.03269e-06	2.67103e-07
5979	-3.74658	0.442911	-2.81641	0.0014107	0.000977097
5980	-4.62877	-2.99388	-1.45369	0.00335857	0.00253572
5986	-2.52399	-0.489114	-2.14932	0.00442535	0.00342551
5988	2.90737	0.287193	1.61503	0.000148851	7.8682e-05
5989	-0.227461	-3.10923	3.37804	4.38568e-07	1.04146e-07
5991	-4.32884	-2.02014	-2.18227	0.000366687	0.000216525
5992	-0.83466	-2.57122	1.56168	0.00119366	0.00080907
6000	0.632477	-1.7021	2.7177	5.47532e-10	4.20088e-11
6002	2.63697	-0.6235	3.06172	2.77765e-06	9.47239e-07
6003	0.0606194	-2.90758	3.09578	3.56554e-06	1.2411e-06
6004	2.66648	-3.8195	6.14552	1.40458e-13	4.03292e-15
6005	2.17438	-2.11779	4.45334	2.23217e-07	4.98547e-08
6006	2.53058	-2.20611	3.6567	7.76423e-06	2.95841e-06
6007	3.06735	-0.793863	3.75046	2.29139e-08	3.32734e-09
6008	0.417808	-3.18079	3.31915	8.75451e-07	2.22932e-07
6009	3.28314	-1.53146	4.53983	2.23035e-06	7.39602e-07
6010	3.79729	-2.50137	5.76282	0.00342776	0.0025928
6011	1.12837	-3.68534	4.25531	4.61127e-08	7.37977e-09
6017	-1.43504	-4.75195	3.42643	2.29139e-08	3.32734e-09
6027	-0.590537	-4.04928	3.09459	2.09184e-08	2.57973e-09
6029	-1.74839	1.02299	-2.54058	4.17267e-06	1.4792e-06
6032	1.49024	-2.98919	4.64336	1.29616e-15	2.40989e-17
6034	-0.483448	-3.63329	2.65951	0.000774659	0.000495534
6039	-0.0329864	-4.37855	4.44737	2.23035e-06	7.39602e-07
6040	2.2066	-3.78993	5.3866	1.8275e-11	9.50526e-13
6041	1.83717	-4.48656	5.30471	4.74948e-05	2.21881e-05
6043	1.81836	-1.73614	2.13003	0.00034453	0.000201172
6048	-2.88886	-0.0472633	-2.32892	0.000467626	0.000283833
6050	3.30848	-0.524564	3.30646	1.24307e-05	4.9091e-06
6055	0.794405	-0.755647	1.71556	5.4807e-08	8.82278e-09
6064	2.69345	-4.17752	5.38052	1.0774e-10	6.44057e-12
6067	0.986053	-1.36687	2.15044	0.00200096	0.00143302
6073	2.4213	-1.60745	3.2223	4.39353e-08	6.96925e-09
6078	-3.84978	-0.610251	-3.31985	2.10489e-07	3.99281e-08
6084	-4.96482	-2.86545	-1.65155	0.00142148	0.000986239
6099	3.20186	-2.04267	4.60459	2.23217e-07	4.98547e-08
6100	4.09455	-0.961649	5.58113	2.18588e-09	2.20382e-10
6106	-2.83445	-0.942886	-2.2408	3.25716e-06	1.12609e-06
6112	-1.55953	-4.51276	3.20317	1.30876e-06	3.48983e-07
6113	-2.88611	-4.38595	1.90919	0.000272247	0.000153135
6117	-4.4114	-2.05038	-2.42731	2.05732e-07	3.84446e-08
6126	2.37786	-2.9898	4.32988	1.03269e-06	2.66669e-07
6139	-4.52866	-1.61707	-2.75691	4.89721e-06	1.77955e-06
6157	-2.30604	-0.0118616	-2.04206	0.000796599	0.000511256
6167	-1.46133	1.06432	-2.6869	3.3109e-11	1.76882e-12
6169	1.52339	-2.98704	4.51042	0.000175415	9.36315e-05
6171	0.589176	-1.45069	1.75667	2.84166e-10	2.12673e-11
6181	-0.395081	3.22746	-3.48238	2.77765e-06	9.47239e-07
6182	0.501277	-3.96102	3.91048	7.95251e-06	3.03202e-06
6183	0.718112	3.59476	-1.98507	8.68963e-08	1.47656e-08
6192	2.49786	-2.13782	4.07975	1.8275e-11	9.50526e-13
6204	0.706669	-4.08931	1.4254	0.00626548	0.0049944
6210	1.42322	3.07143	-1.56439	3.61804e-05	1.64e-05
6213	0.786072	-4.61936	5.10791	1.40458e-13	4.03292e-15
6214	-1.43741	-4.45099	2.87371	2.23035e-06	7.39602e-07
6215	0.0996058	-2.67306	2.33349	2.23035e-06	6.71803e-07
6218	0.297271	2.86533	-2.44285	0.000193821	0.000106239
6219	-2.50309	-4.37606	1.79022	2.6453e-05	1.14926e-05
6241	0.282452	-2.39879	3.00968	1.50266e-09	1.29436e-10
6250	-0.877098	-4.58488	3.00961	9.76134e-05	4.95534e-05
6251	-0.667349	-5.05589	4.31109	2.29139e-08	3.32734e-09
6269	1.55482	-2.47504	4.14438	2.29139e-08	3.32734e-09
6270	1.59898	-3.82686	4.86614	2.00157e-10	1.45089e-11
6272	0.642466	-2.39726	2.92087	0.000136633	7.17414e-05
6276	-0.102143	2.31282	-1.88133	4.07707e-05	1.85958e-05
6277	3.18542	-1.5381	3.62073	4.17267e-06	1.4792e-06
6278	-0.902532	-3.70506	2.76465	2.23035e-06	6.84759e-07
6281	0.472762	-1.97017	2.29316	1.90571e-07	3.53873e-08
6287	2.73964	-3.76004	6.49968	2.18588e-09	2.20382e-10
6304	-4.68425	1.34973	-5.45149	2.1426e-08	2.69991e-09
6311	-0.745911	-2.80466	1.54783	0.00125099	0.000857939
6318	-3.06145	-2.09108	-1.78172	0.00826945	0.00681174
6328	2.09039	-1.03626	2.64314	0.00787126	0.00640223
6338	-4.31788	-2.96716	-1.77946	0.00119361	0.000808753
6346	1.01663	-3.29883	2.45427	0.000193821	0.000106239
6349	1.65069	-1.29438	2.30223	0.000329709	0.000190034
6351	3.10864	-0.521042	3.04548	2.23035e-06	6.48832e-07
6352	1.38684	0.0286355	1.54812	0.00642512	0.00513072
6353	3.05756	-1.55232	3.07129	3.20553e-06	1.10296e-06
6354	3.53463	2.25365	1.54818	0.000668653	0.000419438
6355	3.15935	0.0585407	2.70651	6.22944e-05	2.97324e-05
6356	3.61406	-0.691177	4.53571	2.29139e-08	3.32734e-09
6357	0.315485	-4.39407	4.39308	2.29139e-08	3.0206e-09
6361	1.67499	-1.81187	3.47555	6.2229e-05	2.96865e-05
6363	3.00773	-0.97493	3.13091	3.83592e-08	5.86808e-09
6364	2.17372	-0.750902	2.29208	0.00042146	0.000250456
6365	1.75048	-0.721215	2.29886	3.60092e-07	8.4578e-08
6366	2.99958	0.0726196	2.60694	1.68352e-05	6.91366e-06
6368	1.3318	-0.701649	2.55547	1.70719e-05	7.03126e-06
6371	2.33496	-1.03323	2.55274	0.00111468	0.000747408
6372	2.23741	-0.875638	2.72776	0.00387337	0.00298365
6373	0.591992	-2.24603	3.92839	2.26466e-05	9.72166e-06
6374	1.5418	-2.95117	3.56823	1.21586e-05	4.75872e-06
6375	2.66479	-2.35469	4.96949	6.10497e-10	4.79892e-11
6379	3.14628	0.506385	2.67411	1.31694e-05	5.2938e-06
6381	3.37031	-0.447292	4.31551	2.10489e-07	3.99281e-08
6385	3.19735	1.72239	1.42845	1.73082e-05	7.13266e-06
6387	3.45507	-0.543978	3.91262	1.62669e-12	6.20201e-14
6388	3.33818	0.677361	2.43557	1.54205e-06	4.17358e-07
6390	2.77176	-1.05299	4.40415	2.11617e-08	2.64459e-09
6391	0.938526	-1.59033	2.87602	2.18588e-09	2.20382e-10
6392	2.67871	-1.88412	4.80586	1.19209e-09	1.01562e-10
6393	3.68268	0.0391108	3.76356	6.56039e-11	3.69012e-12
6395	3.58498	0.921188	2.38721	2.90447e-11	1.53802e-12
6397	-4.56438	1.71145	-6.15549	2.18588e-09	2.20382e-10
6398	-3.9037	-0.707176	-3.07619	4.21397e-08	6.61147e-09
6401	0.477928	-3.31219	3.61344	2.42885e-08	3.55552e-09
6407	-4.96664	-3.2518	-1.63788	0.000179399	9.58851e-05
6411	-2.16742	0.604532	-2.079	0.00312114	0.00234178
6413	-1.66056	1.29533	-3.28463	0.000454002	0.000274392
6419	-0.951368	-4.36641	2.33933	0.000366687	0.000216525
6424	-0.176464	-3.25441	2.60828	8.75451e-07	2.22932e-07
6432	-0.0284868	1.76827	-2.85209	0.000116091	5.97259e-05
6438	0.386689	-1.33618	2.45522	9.76134e-05	4.86988e-05
6442	0.542506	2.38747	-1.86563	2.23217e-07	4.98547e-08
6447	1.67492	-3.18706	4.45025	0.00200096	0.00143261
6451	3.94935	1.79636	2.37337	1.31694e-05	5.2938e-06
6453	-2.79083	1.30413	-3.75759	1.03269e-06	2.67103e-07
6455	-0.305022	-2.87801	1.84883	0.00182113	0.00128924
6464	-4.40927	-2.39097	-2.23803	2.18588e-09	2.10526e-10
6473	-0.966266	2.36121	-3.50182	2.23217e-07	4.98547e-08
6479	-1.06174	-2.69972	1.7618	0.00875225	0.00722385
6481	-2.04476	1.58641	-3.58537	2.23035e-06	7.39602e-07
6485	-1.52017	-3.28791	1.41567	0.00640714	0.00511335
6486	-0.0742469	-4.66937	4.65337	2.23035e-06	7.39602e-07
6487	-2.22074	-4.43368	2.25254	9.13886e-05	4.53179e-05
6488	-0.194948	-3.83681	2.78556	0.000988812	0.000656027
6497	0.740118	-3.56852	4.5107	4.21397e-08	6.65468e-09
6498	-0.385219	1.74827	-2.29823	2.88323e-06	9.87313e-07
6499	-1.50117	2.66501	-4.37883	2.23035e-06	7.39602e-07
6500	1.12132	2.69075	-1.76524	8.63833e-06	3.34026e-06
6503	-0.195951	-2.26627	1.48902	0.00787126	0.00640223
6511	-1.06714	-4.07968	3.18644	4.66366e-06	1.69029e-06
6518	0.854577	-4.42872	3.34608	0.000132718	6.88419e-05
6526	-2.22114	2.27055	-3.96058	2.09505e-05	8.87523e-06
6527	-0.213504	-4.53651	4.19897	3.50516e-15	6.76449e-17
6528	-0.874907	-3.4042	2.69854	2.10954e-06	5.96796e-07
6536	-4.65899	-2.19156	-1.60033	0.000406681	0.000241003
6537	-0.531595	2.32148	-2.8484	6.09103e-06	2.24346e-06
6542	0.816858	-3.75483	3.99249	0.000293038	0.000167312
6544	-0.611998	2.47112	-3.02287	0.00117321	0.000794384
6545	0.218251	-4.02954	3.85518	2.71719e-08	4.03517e-09
6554	-0.374988	0.784801	-1.68282	0.00500944	0.00392361
6556	1.17449	-3.1004	4.2378	2.11599e-07	4.01883e-08
6557	2.19744	-4.65079	7.20878	1.8275e-11	9.50526e-13
6558	-0.952376	-3.4548	2.76557	1.13179e-05	4.41637e-06
6579	1.76967	-1.46681	3.04628	1.294e-05	5.17722e-06
6580	-0.583531	-3.18582	2.02534	0.0028061	0.00208559
6581	0.846901	-1.25232	2.39578	3.90894e-06	1.36707e-06
6592	-0.200672	-4.69865	4.4332	4.26237e-09	4.4941e-10
6594	-0.0599585	-4.21768	3.56457	4.74948e-05	2.21881e-05
6595	0.318683	-1.77763	1.70425	0.00135177	0.000933418
6597	-2.63231	2.15286	-4.78517	2.23035e-06	7.39602e-07
6600	-1.05631	-4.89248	4.11982	2.23035e-06	7.39602e-07
6602	-5.10082	-2.76664	-2.03455	8.60696e-06	3.30383e-06
6625	-1.40557	2.83947	-4.28747	9.76134e-05	4.95534e-05
6629	-0.766248	2.15586	-3.0687	9.20564e-07	2.35286e-07
6630	-1.0874	1.48879	-2.85263	0.000361351	0.00021278
6645	1.86133	-2.98156	3.18438	0.000917753	0.000595492
6651	0.488396	-3.74986	3.84982	4.32667e-09	4.62298e-10
6658	0.0418012	-1.88431	1.80122	0.00149869	0.00104122
6660	-4.6724	-2.73905	-1.50129	0.00895968	0.00740982
6674	-1.35713	1.5591	-2.66482	3.05646e-05	1.35605e-05
6688	-0.20361	1.3678	-1.6504	0.00125099	0.000857939
6693	-0.570918	1.24118	-2.60333	0.000276573	0.00015713
6708	-1.01883	-3.45402	2.86862	0.000988812	0.00065348
6717	-0.279303	2.15724	-1.84371	0.000994556	0.000662413
6736	3.39792	-0.0651041	3.1174	0.000595534	0.00037128
6737	-4.60139	-1.70806	-3.05383	2.10151e-05	8.93724e-06
6747	-0.358212	1.64668	-2.17007	0.000988812	0.000656027
6748	2.88236	-0.14439	2.30525	3.13597e-05	1.3982e-05
6750	1.9586	-1.10563	2.89569	1.21586e-05	4.75849e-06
6751	1.40027	3.18933	-2.28796	7.9338e-07	1.97824e-07
6772	-1.91823	0.442429	-1.61929	0.00570035	0.00451305
6786	-2.9282	-4.6038	2.21483	2.68728e-06	9.03656e-07
6798	-4.01425	-0.949996	-3.17786	7.76423e-06	2.95841e-06
6815	-4.95548	-0.584313	-4.66152	3.26617e-14	7.61006e-16
6828	-2.12345	-3.85506	2.0297	8.71126e-06	3.37051e-06
6831	0.0307131	-2.74044	2.04433	0.00615766	0.00490555
6832	2.03211	-1.86944	4.0769	0.00034453	0.000201172
6833	2.38651	-1.44756	3.35041	3.05646e-05	1.35233e-05
6834	-0.256802	-2.51401	2.73061	0.000188446	0.000102805
6835	3.74121	-1.06311	4.53045	5.46405e-18	5.65823e-20
6837	3.13245	-0.606565	3.5692	1.51975e-06	4.10607e-07
6840	-2.43593	-4.43085	2.157	1.82714e-08	2.22749e-09
6846	1.79664	-0.0990874	1.98636	0.00342776	0.0025928
6856	1.24007	2.38212	-1.54822	0.00647305	0.00517662
6885	-2.23563	0.958931	-3.19456	0.00615766	0.00490555
6888	0.397195	-4.34236	3.42696	7.9338e-07	1.96306e-07
6889	1.08653	2.49303	-1.4418	2.23035e-06	7.39602e-07
6890	-0.2179	2.02481	-2.47976	0.00158868	0.00111458
6891	-0.185051	1.16704	-1.48173	0.00125099	0.000857939
6892	0.635373	-2.50428	3.21329	1.80113e-07	3.33606e-08
6896	-3.29116	-1.37342	-1.5616	0.00713042	0.005761
6897	-0.174222	-2.47101	2.53993	0.00158868	0.00111458
6899	1.55341	-3.85587	4.77952	1.07512e-15	1.92301e-17
6902	1.07363	-1.34364	1.77979	0.000774659	0.000495534
6904	0.568908	-1.8401	2.39431	0.000135848	7.06894e-05
6906	0.861212	-3.10678	3.23826	7.9338e-07	1.99419e-07
6907	-0.946501	-4.05411	2.63529	3.26168e-05	1.47002e-05
6912	3.1307	1.62754	1.6738	0.00089171	0.000577964
6928	-0.0694168	-4.48416	4.34711	8.85114e-10	7.29089e-11
6933	-0.222999	-3.85588	3.02929	6.77219e-08	1.1125e-08
6938	-4.38919	-1.80923	-2.15616	0.00313277	0.00235418
6940	-3.25108	1.82163	-4.7402	2.23035e-06	7.39602e-07
6944	2.40655	-1.53906	3.29107	1.24307e-05	4.9091e-06
6945	0.9823	-0.960685	1.94299	0.00615766	0.00490555
6949	-1.20761	1.11566	-2.36285	1.67676e-06	4.62501e-07
6954	-1.10997	-3.87579	1.82321	4.64122e-05	2.13765e-05
6979	2.13613	-1.24711	3.14879	0.000363474	0.000214115
6984	1.82853	-0.686065	2.23403	0.00820379	0.00669008
6985	-5.02784	-0.748962	-3.52005	4.21397e-08	6.65468e-09
6987	-0.377528	-3.82122	3.71202	1.16952e-14	2.61483e-16
6988	-1.59569	-3.31675	2.48897	6.99273e-05	3.40009e-05
6989	-0.406339	-3.08628	2.35022	8.75451e-07	2.22932e-07
6990	2.22675	-2.69957	5.13106	2.09505e-05	8.87523e-06
6991	0.145514	-3.59906	3.06379	4.17267e-06	1.49564e-06
6992	1.44895	-2.17195	3.01485	2.23217e-07	4.29746e-08
6993	0.0214643	-4.42158	3.81657	3.51034e-07	8.22026e-08
6997	2.29879	-0.665701	3.1836	0.00312814	0.00234923
6998	-0.142419	-4.91221	4.10687	6.42377e-09	7.1056e-10
7003	-4.22215	-2.13439	-2.61673	1.30876e-06	3.48983e-07
7011	0.0127725	-2.5046	2.08417	6.40754e-06	2.37059e-06
7013	0.518329	-4.02549	4.57617	2.18588e-09	2.20382e-10
7015	3.30754	-4.25631	5.28439	1.0858e-06	2.81862e-07
7018	0.98221	-2.47707	3.24741	2.23035e-06	7.39602e-07
7022	2.43937	-2.51563	4.13772	1.42348e-12	4.58971e-14
7030	0.823887	-0.22157	1.55547	0.0044427	0.00343998
7036	-0.736449	2.16447	-2.87342	0.00810322	0.00660615
7039	3.59685	-1.02825	5.02056	2.23035e-06	7.39602e-07
7042	0.805554	-3.47182	3.63654	2.23217e-07	4.98547e-08
7046	-1.33821	-3.23955	1.74746	0.00691126	0.00555959
7055	-0.393365	-2.91313	1.46447	0.000124291	6.42372e-05
7067	-2.66911	-0.679403	-2.1777	0.000433425	0.000257974
7068	-2.46419	1.25506	-3.45833	1.82888e-10	1.14063e-11
7075	0.094558	-1.32191	1.60621	0.000153422	8.12138e-05
7079	-0.411794	2.45637	-3.03787	0.00238954	0.00172931
7092	0.624215	-2.16214	2.54238	9.55634e-06	3.70198e-06
7094	-0.464347	-2.25168	1.94911	0.00385968	0.00296311
7097	-0.520199	-2.27149	2.11025	0.00529918	0.00416177
7101	-0.261617	-3.31069	2.72302	0.00221437	0.00159316
7104	0.585492	-2.96508	3.33377	1.27207e-07	2.25733e-08
7115	2.76491	-0.620169	2.72129	2.74382e-07	6.32195e-08
7117	2.89837	-1.66518	4.43469	2.23035e-06	7.39602e-07
7123	-0.78258	-4.63962	3.59327	6.03718e-10	4.72529e-11
7126	0.581286	2.21709	-1.71798	0.00542884	0.00426675
7133	0.929927	-1.12334	2.23513	3.13597e-05	1.40524e-05
7135	0.247439	-1.72995	3.05869	2.23035e-06	7.39602e-07
7136	0.662801	-4.41829	4.47203	2.74051e-06	9.24898e-07
7138	-0.441965	-4.11381	3.60572	2.18588e-09	2.20382e-10
7139	1.32923	-4.4254	6.28597	1.22302e-08	1.42479e-09
7140	-0.495979	-3.56889	2.93381	1.493e-06	4.01625e-07
7153	-2.68992	-4.31376	1.98517	1.1891e-06	3.10079e-07
7156	0.00504539	-4.8175	4.40452	7.28523e-27	2.40041e-29
7158	0.0560091	-3.66261	4.29685	7.9338e-07	1.99419e-07
7159	1.5533	-1.61042	3.65957	0.000361351	0.00021278
7160	-0.33018	-2.78089	2.45838	1.27207e-07	2.25733e-08
7161	0.0380331	-4.47069	4.46234	7.77582e-10	6.36852e-11
7162	0.131125	-3.79625	3.58537	5.33043e-09	5.76415e-10
7164	1.12618	-3.9632	4.97792	8.16446e-13	2.53638e-14
7165	-1.87047	0.165348	-2.32036	6.99273e-05	3.40009e-05
7166	-3.68992	-1.30133	-2.56602	2.23035e-06	7.39602e-07
7167	-4.70561	-1.51469	-3.47666	7.9338e-07	1.99419e-07
7171	-1.75234	-3.97977	2.28918	0.00713042	0.00576106
7178	-2.1991	1.93877	-4.00383	1.30876e-06	3.48983e-07
7187	0.0738728	-3.84968	3.3394	2.28418e-12	9.03136e-14
7188	3.23909	-3.97595	6.10439	1.8275e-11	9.50526e-13
7194	-3.75125	0.467776	-3.86395	2.18588e-09	2.20382e-10
7218	-4.25454	-1.35535	-2.75165	2.72449e-05	1.18623e-05
7229	0.081784	-4.9641	4.08681	7.9338e-07	1.99419e-07
7248	0.0461924	-1.73835	2.13645	6.09103e-06	2.24346e-06
7249	1.41706	-4.11761	6.28199	2.23217e-07	4.98547e-08
7250	0.1653	-4.63382	4.53233	6.62096e-11	3.8021e-12
7251	1.81366	-3.34923	4.78814	2.29139e-08	3.32734e-09
7252	1.27198	-3.7368	5.58705	2.23035e-06	7.39602e-07
7253	-0.655732	-4.27609	3.91527	1.62669e-12	6.20201e-14
7254	1.69109	-3.83257	3.6051	0.000135848	7.06894e-05
7258	2.57017	-2.56117	5.61082	2.23217e-07	4.98547e-08
7259	-1.56486	-4.83495	2.61736	4.2932e-07	1.01849e-07
7260	2.43829	-3.92517	6.19258	2.00157e-10	1.45089e-11
7265	-4.62693	-1.24723	-2.80187	5.34314e-05	2.53262e-05
7266	-5.46849	-0.480792	-4.13336	2.23217e-07	4.98547e-08
7270	-4.10816	1.30803	-5.19428	2.23035e-06	7.39602e-07
7271	0.569748	-3.31684	3.55805	0.00889698	0.00735169
7287	0.507015	-3.72229	3.32637	2.6064e-05	1.12991e-05
7292	-1.78953	-3.86766	3.49056	2.18588e-09	2.20382e-10
7293	-2.79036	-4.19974	2.86003	0.00329414	0.0024863
7317	0.696124	3.13303	-2.94198	1.68352e-05	6.9298e-06
7322	1.43407	-1.76481	1.53327	0.00655776	0.0052459
7331	-0.184235	2.42888	-2.50832	0.000188446	0.000102805
7333	-1.37803	-4.00453	1.41741	0.00448093	0.00347064
7336	0.132308	-3.44623	3.73671	7.80337e-09	8.8153e-10
7346	0.10505	-3.76237	3.86742	0.00263454	0.00194382
7358	0.609431	-4.05085	4.64833	2.23035e-06	7.39602e-07
7367	3.87554	-1.82255	5.77415	7.9538e-08	1.33094e-08
7389	0.0603569	-1.67988	2.07625	1.80409e-09	1.5625e-10
7393	1.3768	-2.03935	3.09159	0.000256012	0.000142979
7397	-0.59589	-4.33503	2.8993	1.41101e-05	5.68852e-06
7400	-4.15562	-0.812585	-2.8738	0.000166197	8.85548e-05
7415	-0.774046	-3.28409	2.74231	0.00114433	0.000769977
7419	-0.95488	-4.56523	3.25479	9.93306e-09	1.14315e-09
7420	0.942008	-2.7494	3.6914	6.99273e-05	3.40009e-05
7427	1.01207	-3.96508	5.06916	8.81095e-21	4.56203e-23
7428	-1.87872	-4.39515	2.41664	2.68746e-12	1.08156e-13
7429	-4.50287	-2.96574	-1.69228	0.000136483	7.10844e-05
7430	-4.85331	-1.40163	-3.20414	7.88571e-07	1.93756e-07
7438	-0.315644	-3.33909	2.37703	0.000774659	0.000495534
7442	-1.06798	-4.08145	2.81449	8.38552e-05	4.11481e-05
7444	-2.28686	1.81314	-3.3069	0.000188446	0.000102805
7448	1.76054	0.0907508	1.85145	0.000546951	0.000337516
7449	2.41786	0.437933	2.01374	6.48646e-06	2.40285e-06
7450	2.63787	-2.65631	4.54042	1.8275e-11	9.50526e-13
7451	-0.125594	-3.72264	3.72087	2.23217e-07	4.98547e-08
7452	3.01726	-3.54482	6.68361	2.18588e-09	2.20382e-10
7453	0.8621	-4.13482	4.64483	6.62096e-11	3.8021e-12
7455	1.2552	-1.34236	2.40585	0.000293038	0.000167312
7459	1.05463	-4.86469	4.60551	5.92772e-09	6.5016e-10
7460	-0.590979	2.21727	-2.78065	0.00385968	0.00296311
7461	-3.96474	0.518789	-4.44389	2.29139e-08	3.32734e-09
7468	-0.392691	-3.72755	4.26031	2.23035e-06	7.39602e-07
7470	1.21206	-0.60915	2.31113	0.000188446	0.000102805
7471	0.847181	3.1509	-2.1217	1.01664e-05	3.94308e-06
7475	-4.50019	-2.55756	-2.23958	1.50108e-05	6.09052e-06
7504	-2.5806	0.618503	-2.95036	3.55407e-08	5.41182e-09
7506	-4.52784	0.983972	-4.38027	1.23104e-06	3.22752e-07
7517	1.91398	-0.950687	3.09356	3.30681e-08	4.98084e-09
7547	-0.810452	1.39928	-2.09973	4.74948e-05	2.21881e-05
7548	0.377583	2.5496	-1.4428	0.000988812	0.000648726
7572	-1.41784	1.56919	-2.28549	3.87393e-08	5.93535e-09
7573	-0.715349	-4.07324	2.8552	5.28729e-05	2.49121e-05
7574	-1.04766	-4.40867	3.21961	2.29139e-08	3.32734e-09
7576	-1.50588	-3.99509	2.57683	7.76423e-06	2.95841e-06
7578	-0.366958	2.71749	-3.0469	4.17267e-06	1.4792e-06
7580	-1.24128	1.2448	-2.19636	0.000188446	0.000101454
7581	-0.00147012	2.64122	-2.57107	6.17075e-07	1.4973e-07
7591	-5.35207	-3.70183	-1.45927	2.6453e-05	1.14926e-05
7628	-3.17818	0.861982	-4.13173	7.9338e-07	1.99419e-07
7639	-0.881915	2.67822	-3.63719	6.87819e-05	3.32821e-05
7648	3.14656	0.792645	2.75745	2.77765e-06	9.47239e-07
7650	-1.68489	1.69859	-4.08957	7.96071e-06	3.04452e-06
7654	-0.202269	2.82307	-3.12297	2.23035e-06	7.39602e-07
7666	-4.27828	-0.621481	-3.86042	2.18588e-09	2.20382e-10
7668	1.41336	2.87907	-1.74548	0.000608029	0.000379499
7670	3.31677	-1.64118	4.6109	2.09505e-05	8.87523e-06
7693	-0.867663	2.73706	-3.24867	2.62102e-07	5.95883e-08
7713	-0.110121	-3.16365	3.04852	0.00309028	0.00231643
7714	-0.114857	1.45342	-1.56828	0.00691126	0.00555959
7723	3.57355	-4.5091	8.2097	2.29139e-08	3.32734e-09
7728	0.29782	-1.79331	2.56278	5.80603e-08	9.38749e-09
7733	-4.90191	-1.55625	-2.88259	0.000745046	0.000472032
7744	0.204214	-3.89397	4.1673	2.23035e-06	7.39602e-07
7748	-4.48395	-2.45665	-1.89153	5.71332e-05	2.71346e-05
7750	0.428977	-2.22597	2.85495	2.23035e-06	7.39602e-07
7751	2.73244	-2.53106	5.1064	2.7196e-30	5.12046e-33
7752	0.997617	-1.32567	1.92844	0.000467626	0.000283833
7753	0.99112	-2.60863	3.36357	1.30876e-06	3.48983e-07
7757	2.79938	-1.96978	4.24499	2.23035e-06	7.39602e-07
7758	3.52381	-0.772638	4.23544	2.23035e-06	7.39602e-07
7760	1.62843	-2.79465	4.05958	2.23217e-07	4.98547e-08
7761	-0.0715775	-3.01942	2.46786	0.000293038	0.000167232
7762	-4.4444	-2.12834	-1.83212	0.00126515	0.000870034
7775	-3.58977	-1.96515	-1.83604	0.000188446	0.000102805
7777	1.81406	-2.40518	4.18217	1.4863e-08	1.76999e-09
7778	0.202901	-1.39537	2.01024	0.000361351	0.00021278
7784	0.771243	-2.51043	1.9112	0.00957495	0.00795021
7785	1.30077	-0.964104	2.2223	6.87819e-05	3.32821e-05
7786	-0.701535	-3.74162	3.33766	2.23035e-06	7.39602e-07
7789	0.134394	-4.25908	4.15404	1.8275e-11	9.50526e-13
7790	1.37506	-3.93873	4.99162	5.50743e-10	4.27737e-11
7791	-0.592762	-4.66729	4.00229	0.000546951	0.000337516
7793	1.76866	-2.43505	4.88058	2.23035e-06	7.39602e-07
7798	3.54929	-2.54714	5.89358	2.29139e-08	3.32734e-09
7799	1.05147	-1.41144	2.42466	1.44715e-19	9.19579e-22
7800	0.935511	-3.85862	4.21783	8.81095e-21	4.3888e-23
7801	1.79327	-1.06802	3.5466	6.42377e-09	7.1056e-10
7802	2.84418	-1.44201	4.47175	8.98931e-29	2.11563e-31
7803	3.21386	-1.40426	4.11561	2.29139e-08	3.32734e-09
7804	2.40303	-0.410236	3.15288	1.59861e-32	2.25739e-35
7805	2.75274	-0.333295	3.01327	9.61845e-16	1.58459e-17
7807	0.301486	-1.75313	1.90698	1.45035e-09	1.24589e-10
7808	3.39351	-0.112845	2.92428	2.18588e-09	2.20382e-10
7809	3.29944	-1.86222	4.66183	1.20508e-21	5.10505e-24
7810	1.85648	-2.59249	4.19225	4.95514e-27	1.51605e-29
7811	-0.0838616	-2.41224	2.45451	2.23035e-06	7.39602e-07
7812	2.31067	-0.738959	3.30482	9.71025e-16	1.69112e-17
7813	-0.766267	-2.49667	2.24546	0.00123006	0.000835766
7814	2.04702	-3.11952	4.57271	3.60498e-30	7.63586e-33
7815	3.19034	-2.3623	5.02529	1.62669e-12	6.20201e-14
7816	0.702151	-3.30415	4.04133	3.02333e-21	1.42308e-23
7828	-0.541096	-2.66445	2.43429	9.13886e-05	4.53179e-05
7834	0.293334	-2.88157	3.48945	3.80545e-10	2.90178e-11
7842	0.721908	2.54574	-1.94192	1.294e-05	5.17722e-06
7844	-4.0599	-2.42851	-1.56657	0.00243973	0.00176678
7845	-4.30906	-1.4035	-2.7862	1.24307e-05	4.9091e-06
7847	-0.643463	-4.0319	3.56672	8.14208e-08	1.36627e-08
7852	-0.759654	1.63518	-1.47346	0.000202884	0.000111445
7865	0.0858039	2.03665	-1.69116	0.000188446	0.000102805
7867	0.417496	-4.08737	4.45175	1.62669e-12	6.20201e-14
7868	-0.451292	-3.61516	3.1905	2.23035e-06	7.39602e-07
7874	-4.42158	3.03234	-7.01958	2.23217e-07	4.98547e-08
7882	-1.17478	-3.79261	2.65751	1.81049e-06	5.0237e-07
7884	-2.00899	2.0626	-4.13101	2.23035e-06	7.39602e-07
7892	2.59719	-1.51456	3.87465	8.0001e-07	2.0165e-07
7896	-0.915872	-2.64986	2.18386	0.00317983	0.00239179
7898	0.940077	1.95061	-1.46044	8.60301e-05	4.22558e-05
7908	-2.51811	1.28654	-3.34331	8.68963e-08	1.47656e-08
7915	0.441779	2.05964	-1.73782	7.76423e-06	2.95841e-06
7922	0.555776	1.9996	-1.40463	9.13886e-05	4.53179e-05
7930	-0.836714	-3.95236	3.22116	5.34314e-05	2.53262e-05
7938	0.109595	-3.80831	4.14614	2.23217e-07	4.98547e-08
7939	-0.381593	-3.04199	2.37505	2.46284e-18	2.43444e-20
7941	0.406787	-3.93563	3.25724	1.29029e-05	5.11075e-06
7945	-0.0183378	-3.47028	4.0943	2.23035e-06	7.39602e-07
7946	-2.7257	-3.90492	1.48714	0.00871775	0.00719332
7948	1.73545	-3.91387	5.77934	2.18588e-09	2.20382e-10
7949	-0.0423893	-3.49659	3.59554	6.81086e-06	2.53263e-06
7951	-0.00512347	-3.25876	3.19122	0.00158868	0.00111458
7952	-3.19719	1.52846	-4.46373	1.294e-05	5.17722e-06
7953	-1.26868	1.73212	-2.14018	0.000234386	0.000129467
7956	-2.209	1.43609	-3.01886	1.68352e-05	6.91366e-06
7960	-1.43964	-5.1147	3.76188	2.23035e-06	7.39602e-07
7961	1.95902	-1.93328	3.15351	1.33428e-07	2.38657e-08
7965	-0.782621	3.43623	-3.93484	2.63122e-07	5.9944e-08
7966	0.320559	2.71631	-2.39575	0.000546951	0.000337516
7967	-0.390194	-4.85242	4.94974	1.16578e-09	9.90461e-11
7969	-3.43055	-1.01248	-2.41807	0.00200096	0.00143302
7970	2.26875	-0.335166	2.49582	3.05646e-05	1.35605e-05
7983	-2.80575	0.151285	-3.37292	6.89442e-07	1.68912e-07
7984	-4.80376	-3.07238	-1.62165	4.64122e-05	2.13765e-05
7986	0.184805	1.89017	-1.84582	0.000202884	0.000111445
7996	0.0849819	-2.20025	2.18879	6.04127e-05	2.87063e-05
8013	-0.678257	-4.39527	3.7006	1.62669e-12	6.20201e-14
8024	-0.885155	-3.70028	2.55443	0.000112217	5.73101e-05
8031	-0.548298	-4.3948	3.8465	1.0774e-10	6.44057e-12
8035	-2.93593	0.506266	-3.13321	0.000361351	0.00021278
8043	-3.30583	0.272372	-3.77406	2.23035e-06	7.39602e-07
8062	-0.703769	2.02219	-1.51489	0.00342776	0.0025928
8075	0.49528	2.56051	-2.09632	0.000454002	0.000274392
8076	-2.03708	-4.30469	1.75435	0.00223639	0.00160953
8077	-2.76424	-4.39806	1.55308	0.000148643	7.85371e-05
8078	1.36639	3.26689	-1.81241	0.00200096	0.00143302
8082	-4.70606	-2.89606	-2.06139	1.17446e-06	3.05708e-07
8083	-0.0617697	-2.09377	2.41942	3.51034e-07	8.22026e-08
8084	-0.314198	-3.72185	3.71972	4.61127e-08	7.37052e-09
8085	2.55047	-4.24758	6.72344	3.6027e-12	1.50077e-13
8089	2.21788	-2.31913	2.46373	1.79541e-07	3.317e-08
8091	-0.570048	1.74666	-2.15328	0.000361351	0.00021278
8092	-2.44212	-3.6587	1.42293	0.00810322	0.00660615
8093	-0.941628	-2.44676	1.94064	7.76423e-06	2.90254e-06
8102	-2.18304	-0.153298	-2.12836	5.48777e-06	1.99673e-06
8110	-1.59329	-3.51706	1.42638	1.15612e-05	4.51402e-06
8111	-0.463274	-3.48545	3.47084	4.40615e-08	7.02039e-09
8130	-0.586491	-4.07415	2.84337	0.000188446	0.000102805
8131	-0.420763	-2.90603	2.0812	3.8206e-08	5.83566e-09
8132	0.368768	-4.62358	4.73774	2.23035e-06	7.39602e-07
8133	0.0342841	-2.79094	2.95587	5.88109e-09	6.40844e-10
8134	-0.463257	-3.22253	2.8006	0.000454002	0.000274495
8136	-0.53918	-2.55327	2.34451	1.30212e-06	3.44454e-07
8137	-0.899762	-2.93693	2.2787	1.1738e-07	2.05809e-08
8139	0.285754	-3.3012	3.3487	7.80337e-09	8.8153e-10
8149	-0.328806	-2.99515	2.12772	0.000148179	7.8222e-05
8157	0.106471	-2.5592	2.90565	0.00085511	0.000553034
8161	1.48403	3.00647	-1.78584	2.23035e-06	7.39602e-07
8192	-2.45471	-0.166486	-2.19705	6.87819e-05	3.32821e-05
8211	-2.11886	2.89563	-4.00284	7.9338e-07	1.99419e-07
8228	-2.19001	-0.718544	-2.23121	0.00309028	0.00231643
8235	-0.310699	-3.96118	3.16435	2.69344e-06	9.07744e-07
8238	-3.34899	2.05606	-5.64385	9.13886e-05	4.53179e-05
8246	-4.87967	1.22653	-5.70341	2.23217e-07	4.98547e-08
8252	0.0304792	-2.69592	2.48767	0.000107815	5.4859e-05
8253	-1.16643	-4.42965	2.83339	1.15459e-13	2.96187e-15
8262	-0.78091	-3.9724	2.8474	0.0024983	0.00182978
8266	1.0381	2.73588	-1.55825	0.00201126	0.00144279
8271	-2.37131	-3.84284	1.77443	0.000988755	0.000646216
8290	-4.66152	-2.18103	-2.41815	0.000361351	0.00021278
8293	-0.696503	3.01409	-3.79921	4.17267e-06	1.49564e-06
8294	1.0731	-1.86767	2.77754	2.90239e-10	2.18584e-11
8296	0.640699	-4.08562	4.3221	9.33454e-14	2.35066e-15
8297	-0.88132	1.56172	-2.52491	0.000546951	0.000337516
8303	0.2874	-2.46726	2.75466	3.05225e-06	1.04735e-06
8304	0.696876	2.59937	-2.13886	0.000994556	0.000660648
8305	-0.053213	-2.60607	2.69884	4.21397e-08	6.61147e-09
8309	-2.4895	-0.132346	-2.79829	2.23035e-06	7.39602e-07
8312	-3.43783	-0.820148	-1.94178	0.00489078	0.00382491
8313	1.36003	-0.773011	2.19889	7.21032e-10	5.80356e-11
8317	0.142232	-3.31564	3.4846	2.23035e-06	7.39602e-07
8318	0.216434	-4.23267	4.21543	3.00533e-24	1.13169e-26
8319	0.365538	-3.22895	4.25924	2.23035e-06	7.39602e-07
8324	0.628744	2.82787	-2.34849	2.30601e-06	7.69575e-07
8332	-1.43499	-4.01747	2.4804	2.23035e-06	7.39602e-07
8333	-0.315021	-4.60479	4.63354	1.23104e-06	3.22752e-07
8366	0.00825948	1.83558	-1.60458	0.0003358	0.000193703
8367	1.47483	-2.56839	4.19312	1.8275e-11	9.50526e-13
8375	2.93221	0.99474	2.1152	2.02971e-06	5.66063e-07
8376	0.638031	-1.83479	2.40833	2.87781e-47	6.7729e-51
8378	0.136997	-3.70046	3.36169	6.03718e-10	4.73142e-11
8401	2.56922	0.609431	1.7151	0.000329709	0.000190034
8402	-1.11578	2.93158	-3.04642	4.69126e-07	1.11954e-07
8404	-1.40871	-3.56785	1.90095	0.00279946	0.00207868
8408	0.895476	-1.16866	2.03614	1.294e-05	5.17722e-06
8416	-2.365	-4.20232	1.53375	0.00642512	0.00513072
8421	-0.189433	-2.58584	1.64468	0.00329414	0.0024863
8434	-0.490946	2.00412	-2.89089	0.00691126	0.00555959
8436	-2.81847	2.1841	-4.06658	0.00034453	0.000201172
8437	-2.90509	1.09544	-3.35694	2.23217e-07	4.98547e-08
8438	-0.881121	2.24299	-2.57726	0.0024983	0.00182978
8439	0.427503	1.93385	-1.44171	1.03269e-06	2.67103e-07
8441	-3.47317	0.517412	-3.84444	0.000454002	0.000274392
8448	-4.98507	-2.61233	-2.06569	2.23217e-07	4.98547e-08
8450	0.574704	3.03973	-2.82578	0.00309028	0.00231643
8452	-0.0426369	-3.38	2.00092	0.000136745	7.18642e-05
8464	2.91942	-1.6205	3.97886	8.28627e-08	1.39632e-08
8471	-3.21786	-1.46168	-1.72774	0.00581323	0.0046038
8473	0.674258	-1.78663	2.67957	5.45643e-14	1.32269e-15
8484	1.92645	0.697157	1.44972	0.00158868	0.00111458
8485	-3.90569	0.602262	-4.32273	2.67012e-08	3.94642e-09
8493	0.598185	-1.38548	2.30324	0.00642538	0.00513244
8511	-1.42272	-0.139715	-1.73241	0.000582447	0.000359831
8528	2.7223	-0.110782	2.65265	2.23035e-06	7.39602e-07
8531	0.138267	-0.904784	1.75404	2.40683e-05	1.0366e-05
8533	-0.0636817	-3.87526	3.76074	1.01074e-18	9.03929e-21
8535	-0.903749	-4.27282	2.73798	6.68529e-11	3.85478e-12
8539	0.608518	-4.2619	4.72267	2.23035e-06	7.39602e-07
8544	-0.0029033	2.7549	-2.16127	0.00158868	0.00111458
8545	-0.120793	2.14524	-2.18492	4.17267e-06	1.49564e-06
8547	0.343992	2.34153	-2.37726	1.66872e-07	3.06332e-08
8548	0.289875	1.5172	-1.44877	0.00465562	0.00363662
8549	-0.897974	1.68749	-2.26149	2.80626e-08	4.18727e-09
8550	0.69244	-4.44821	5.41191	1.8275e-11	9.50526e-13
8556	-1.25629	-3.23475	1.60313	0.00221437	0.00159316
8558	-0.606285	-3.10351	2.49723	1.30876e-06	3.48983e-07
8571	-3.13766	0.92622	-3.90802	4.07999e-05	1.86764e-05
8586	-0.116119	2.74708	-2.6349	3.05646e-05	1.35605e-05
8587	0.882067	2.4419	-1.86127	0.00380922	0.00291403
8588	-4.75877	-1.80298	-2.84705	1.48874e-05	6.03693e-06
8591	1.21817	2.51481	-1.48816	0.00194201	0.00137664
8610	-2.53942	-4.09953	1.57284	2.25057e-05	9.60824e-06
8614	0.285813	2.83396	-2.87479	0.00158868	0.00111458
8615	-0.421599	-4.46583	4.50198	2.00157e-10	1.45089e-11
8616	-0.848796	-3.69384	1.66416	0.00823353	0.00674339
8617	-2.256	0.0332751	-2.59334	2.23035e-06	7.39602e-07
8618	-1.94344	-4.29302	1.49925	0.0012591	0.000865277
8627	1.82815	-0.63787	2.28512	0.00542884	0.00426999
8630	3.07272	1.17517	2.20126	2.09505e-05	8.87523e-06
8647	2.85474	-1.6116	4.14536	2.10489e-07	3.99281e-08
8652	-1.76612	0.513981	-2.01458	0.000811162	0.000523275
8655	1.33327	-2.47614	4.1015	1.81126e-06	5.03436e-07
8656	3.17808	-2.4691	5.83726	1.62669e-12	6.20201e-14
8657	2.53676	-4.18358	6.20943	1.29257e-08	1.51799e-09
8665	0.360893	-4.77254	4.95948	3.43594e-09	3.57418e-10
8667	0.639858	-5.40598	5.70518	1.23104e-06	3.22752e-07
8673	0.629803	-1.59623	2.52203	1.93298e-09	1.68323e-10
8674	-0.475737	-4.42668	2.30719	5.13419e-05	2.41424e-05
8675	0.0993371	-4.23592	4.28335	8.63833e-06	3.34026e-06
8676	1.61806	-2.80991	3.73463	5.19074e-16	8.30715e-18
8678	0.742455	-3.76332	3.95961	7.9538e-08	1.33094e-08
8681	0.446406	-2.94273	3.17703	1.30315e-08	1.54268e-09
8687	-0.141167	-3.03223	3.00923	0.00123006	0.000835766
8688	2.56251	-1.11449	3.677	6.99273e-05	3.40009e-05
8689	1.84949	-3.80517	4.91003	1.68833e-07	3.10328e-08
8695	-0.649187	2.51917	-3.85708	0.000256617	0.000144222
8696	-4.18762	-1.20889	-2.0762	0.00114433	0.000769977
8697	-1.16426	-3.6446	2.26189	0.00826945	0.00681174
8717	-0.0187355	-2.59457	2.68485	0.00104525	0.000698634
8718	1.18726	-2.33205	3.53944	2.05369e-11	1.07301e-12
8725	1.21383	-0.748695	1.67586	0.00167194	0.00117457
8741	1.53656	-0.4784	2.40755	1.00942e-07	1.74612e-08
8757	1.44356	-3.60987	4.65863	2.00157e-10	1.41394e-11
8762	1.07792	-0.968415	1.57868	0.00542884	0.00426999
8767	-1.35699	-2.52969	1.55759	0.000237495	0.000132246
8770	-4.52819	-1.30383	-2.70695	0.00309028	0.00231643
8781	1.4376	-3.81343	4.44373	4.07707e-05	1.85585e-05
8786	-0.0212145	-4.7183	4.3371	3.80545e-10	2.90178e-11
8789	-3.63886	0.885989	-4.25221	0.00167846	0.0011827
8797	-0.199587	-2.83549	2.08591	7.76423e-06	2.95841e-06
8798	0.916566	-3.55687	4.47344	2.70794e-07	6.18193e-08
8800	3.13505	-4.22658	6.93651	2.29139e-08	3.32734e-09
8801	-2.86695	-5.00491	1.81903	0.00279882	0.00207754
8805	0.347693	-4.12453	4.05263	4.21188e-07	9.97093e-08
8806	0.900914	-1.85117	4.40887	5.92772e-09	6.529e-10
8807	0.256048	-4.56181	4.33196	5.04619e-11	2.79091e-12
8811	0.72012	-3.15385	4.31359	2.23217e-07	4.98547e-08
8812	1.56922	-3.23121	4.42352	2.10489e-07	3.99281e-08
8813	0.338602	-3.52094	3.70478	8.63833e-06	3.34026e-06
8816	3.26743	-2.5028	4.24303	1.31525e-06	3.51951e-07
8830	2.02458	-1.28332	2.52388	1.96946e-05	8.17635e-06
8831	-0.134162	-4.41539	4.37647	7.21032e-10	5.80356e-11
8832	-3.997	-2.37447	-1.97704	3.56554e-06	1.2411e-06
8835	2.86903	0.711456	1.9061	1.55139e-07	2.81871e-08
8841	-1.29678	-4.43318	3.07336	6.99273e-05	3.40009e-05
8843	0.78807	2.61883	-2.17751	1.67676e-06	4.62501e-07
8845	0.0603913	2.37096	-2.32149	5.92772e-09	6.529e-10
8847	-1.64711	3.0706	-4.71771	0.000361351	0.00021278
8850	1.36709	-3.23261	4.90281	4.32667e-09	4.62298e-10
8852	0.584223	-3.23179	3.19829	2.42826e-12	9.65816e-14
8853	0.115922	-3.74399	3.16857	1.41809e-09	1.21483e-10
8857	0.253858	-4.24877	4.57073	4.8853e-34	2.29951e-37
8859	0.247226	-4.16875	4.69813	1.62669e-12	6.20201e-14
8860	0.538886	-4.6853	4.8513	2.23217e-07	4.98547e-08
8861	-1.04209	-3.53385	3.00994	2.77765e-06	9.47239e-07
8872	-1.27219	-3.70363	2.35734	6.03538e-06	2.21018e-06
8873	3.72958	-0.226731	3.80551	2.23217e-07	4.98547e-08
8875	1.82196	-3.02126	4.84521	5.48685e-19	4.51965e-21
8882	0.446513	2.1278	-1.99486	3.13597e-05	1.3982e-05
8883	-0.251851	2.10366	-2.3336	0.000234386	0.000129467
8885	0.690982	2.00427	-1.6168	0.000988755	0.000646216
8886	0.153558	2.64325	-2.30517	1.6322e-06	4.44064e-07
8887	0.380479	2.6505	-2.35803	1.55846e-08	1.86326e-09
8889	-0.7977	2.34514	-2.54698	6.2229e-05	2.96865e-05
8890	-0.053969	2.20625	-2.47935	5.92772e-09	6.5016e-10
8891	-0.0575694	-3.44346	3.24724	9.8173e-15	2.05634e-16
8892	0.530622	2.42055	-1.84556	1.67676e-06	4.62501e-07
8897	0.214427	3.10765	-2.84125	2.23035e-06	7.39602e-07
8902	2.63065	-1.85569	4.29236	2.29139e-08	3.32734e-09
8909	-0.0461931	-2.46829	1.47163	8.28627e-08	1.3956e-08
8910	-0.928375	-3.16292	1.94716	1.14542e-13	2.91141e-15
8912	0.0744084	-1.71924	1.61155	1.19947e-05	4.68611e-06
8914	1.00838	-0.882028	2.35732	3.13597e-05	1.40524e-05
8917	-2.02578	-0.0538033	-1.59654	0.00173714	0.00122487
8918	-2.61104	0.713583	-2.79418	1.10707e-09	9.30157e-11
8922	-0.789326	-2.31167	1.81399	2.00157e-10	1.30277e-11
8936	0.071016	2.0583	-1.51066	2.29121e-05	9.85184e-06
8939	-0.820938	1.50982	-2.39228	2.77765e-06	9.47239e-07
8962	-0.876295	2.66461	-3.3639	1.68352e-05	6.9298e-06
8978	-0.406377	-3.04288	1.63359	0.00784084	0.00636642
8999	-2.73317	0.71845	-3.45726	2.23035e-06	7.39602e-07
9002	-4.17911	-0.2688	-3.79113	2.23035e-06	7.39602e-07
9004	-2.4939	1.33941	-2.79935	0.00117321	0.000794384
9005	-0.203261	2.05701	-1.75625	0.00238954	0.00172931
9019	-1.17476	1.26531	-1.75353	0.00713042	0.00576106
9040	-0.379531	1.44666	-1.52581	0.000256617	0.000144222
9042	-1.15923	-3.33743	2.77694	4.87022e-08	7.81712e-09
9043	-0.464242	1.56632	-1.92417	1.24307e-05	4.9091e-06
9051	-0.0917446	2.14011	-1.84014	1.64702e-11	7.44241e-13
9052	0.992388	2.45947	-1.55348	0.00455276	0.00353377
9054	0.848826	2.14849	-1.50597	0.000193821	0.000106239
9073	2.13598	-0.688124	2.36286	6.77219e-08	1.11084e-08
9076	1.92025	-0.364036	2.38457	0.000136633	7.17414e-05
9093	0.651547	2.67654	-2.16462	1.294e-05	5.17722e-06
9098	-4.74648	-2.46907	-2.39054	2.33667e-18	2.23104e-20
9104	0.359547	2.20744	-1.81295	0.000305538	0.000174809
9130	-1.30299	1.6421	-2.83791	6.38413e-08	1.03673e-08
9137	-0.660343	1.68527	-1.43272	0.00103064	0.000688388
9143	-1.28922	0.315752	-2.62752	0.000448905	0.000268667
9147	-2.90745	1.84052	-4.16274	5.62318e-07	1.34856e-07
9152	2.22156	0.531423	2.00961	2.42318e-05	1.04478e-05
9175	-1.44969	0.740921	-2.01782	5.03011e-05	2.36175e-05
9179	-2.27509	0.521454	-3.14847	2.88323e-06	9.87313e-07
9181	-4.00929	0.377115	-3.67092	0.00263454	0.00194382
9184	-0.289816	2.26856	-1.79807	0.00194201	0.00137664
9200	0.60074	2.01837	-1.65241	0.000537067	0.000329015
9202	-0.57442	1.29897	-2.31061	0.00107794	0.000720993
9210	0.543939	2.37299	-2.14909	7.52526e-11	4.35682e-12
9212	-0.271798	1.45069	-1.78438	5.08355e-05	2.38923e-05
9243	1.80739	-0.905594	2.51054	5.03011e-05	2.36175e-05
9244	1.23118	0.0844416	1.98303	3.48774e-06	1.2091e-06
9245	-0.362957	2.19866	-2.45092	1.66013e-07	3.02801e-08
9276	0.289686	2.2867	-2.08971	0.00691126	0.00555959
9277	-1.21296	2.10193	-2.72901	5.33043e-09	5.77076e-10
9280	0.202177	1.91633	-1.58721	1.0349e-05	4.02608e-06
9289	-1.69042	-3.5731	1.89564	0.00709657	0.005712
9301	1.06464	-1.43183	2.81817	1.0286e-06	2.64352e-07
9309	-2.33574	-4.57301	1.85426	0.00251508	0.00184858
9335	-2.53324	-0.29688	-2.46216	4.17267e-06	1.49564e-06
9344	-0.838367	1.40861	-2.19971	0.000454002	0.000274392
9345	-2.13769	-4.61548	1.69528	0.00180154	0.00127452
9349	-0.820962	-3.31183	2.07982	0.000148179	7.81425e-05
9350	-2.70028	-0.124912	-2.36058	0.00309028	0.00231643
9356	-0.397277	1.37368	-2.35195	9.13886e-05	4.53179e-05
9361	2.40997	-2.29112	4.84974	0.000136633	7.17414e-05
9401	1.37088	-1.56773	1.90301	0.00826945	0.00681174
9407	-2.80117	1.43907	-4.85313	2.23217e-07	4.98547e-08
9413	2.20481	-1.18668	3.15261	0.00200096	0.00143261
9418	0.513978	1.92885	-1.56801	0.00465562	0.00363662
9419	-1.37938	-3.29462	1.81006	7.9338e-07	1.96306e-07
9429	1.10531	2.47236	-1.71434	0.00993729	0.00829316
9432	1.05475	2.48046	-1.52576	0.0019888	0.00141168
9435	-1.46679	-3.75219	2.05939	0.000124214	6.41681e-05
9436	-3.01363	-0.269466	-2.10676	0.000153422	8.13506e-05
9439	1.55166	3.28022	-1.56938	0.00015927	8.4489e-05
9441	0.104598	2.69557	-2.59097	0.00615766	0.00490555
9445	0.901892	1.80268	-1.57425	0.00615766	0.00490555
9447	-4.70732	-1.8119	-2.82135	1.41428e-10	8.6208e-12
9450	-1.95229	0.0882363	-2.70947	2.25819e-07	5.04891e-08
9451	-2.34821	0.932415	-3.45571	2.23035e-06	7.39602e-07
9452	-3.32267	1.82962	-4.30387	0.00309028	0.00231643
9456	-1.31913	-3.0061	1.50693	0.000546951	0.000337516
9457	-1.57342	2.30938	-3.82794	0.000188446	0.000102805
9458	-0.0318413	2.66416	-3.1871	8.68963e-08	1.47656e-08
9459	0.983911	2.84815	-2.3554	0.000448905	0.000268667
9470	-4.64089	-2.99508	-1.54236	0.00270523	0.00199788
9474	0.927921	-3.65756	4.94132	1.68352e-05	6.89758e-06
9476	2.75884	-2.23264	4.04158	0.0011606	0.000781202
9483	0.186655	-3.15291	3.55729	2.05732e-07	3.84446e-08
9502	-4.89275	-2.39011	-3.12521	2.67012e-08	3.94642e-09
9503	-0.839839	-2.22171	1.43953	0.00111468	0.000747408
9510	-5.00232	-2.24968	-2.94151	7.97271e-10	6.54854e-11
9511	3.70162	-0.295287	4.16687	2.23217e-07	4.98547e-08
9513	-2.65063	-0.518136	-2.699	6.45363e-05	3.0848e-05
9515	-0.410913	-4.0689	3.35129	0.000448905	0.000268667
9516	-1.41569	-4.86207	2.79192	2.67012e-08	3.94642e-09
9521	-3.38136	-0.560451	-2.57333	2.23217e-07	4.98547e-08
9524	0.334956	-2.68772	3.11737	2.73235e-09	2.7973e-10
9525	-3.95559	-1.17525	-2.35251	3.26168e-05	1.47002e-05
9531	0.835251	-3.9555	3.89455	2.42885e-08	3.55552e-09
9536	-0.591294	-3.26144	2.04309	9.43817e-05	4.7002e-05
9540	0.670023	-1.45946	1.88696	0.00293714	0.00218437
9542	0.666608	3.22923	-2.1297	2.10954e-06	5.98256e-07
9543	1.80728	-3.01375	3.88601	1.4863e-08	1.76999e-09
9544	0.0456623	-4.25642	3.42053	1.13179e-05	4.41637e-06
9549	0.867135	-4.51612	5.40023	1.40458e-13	4.03292e-15
9550	0.997418	-1.81901	2.86037	6.77219e-08	1.1125e-08
9555	-0.644241	-3.19189	2.30956	0.000480184	0.00029185
9564	3.29079	-2.16265	5.90325	2.23035e-06	7.39602e-07
9569	-4.86174	-2.984	-1.56316	0.000412092	0.000244695
9574	-3.44383	-0.455352	-2.92171	2.27671e-06	7.57117e-07
9575	-1.86832	1.32405	-3.55874	1.24139e-05	4.88786e-06
9592	-4.29706	-2.1155	-2.11243	2.10954e-06	5.96796e-07
9596	-3.95495	-0.741171	-3.74344	2.23217e-07	4.98547e-08
9597	-4.45951	-2.31428	-1.80738	1.34119e-07	2.40208e-08
9605	0.554956	-3.62127	4.25409	1.23104e-06	3.22752e-07
9607	0.46044	-3.28151	4.27603	1.16952e-14	2.61483e-16
9608	1.56095	-3.63167	4.73514	2.23035e-06	7.39602e-07
9609	-0.246694	-2.7266	2.30401	0.00097131	0.000632072
9611	1.21835	-0.864034	2.29858	2.02144e-06	5.63282e-07
9612	0.206997	-3.66791	3.23449	4.50924e-09	4.82867e-10
9613	1.23975	-3.48615	5.19507	2.18588e-09	2.20382e-10
9614	1.18233	-4.06592	5.18162	2.23217e-07	4.98547e-08
9615	0.936631	-3.89653	3.35574	2.88323e-06	9.87313e-07
9616	1.42737	-2.93375	5.30013	7.9338e-07	1.99419e-07
9618	-0.233772	-2.68485	2.48249	5.26395e-15	1.04065e-16
9620	2.40497	-1.1294	3.53437	8.63833e-06	3.34026e-06
9621	2.57635	-2.85611	4.70826	6.87819e-05	3.32821e-05
9623	0.227851	-4.8621	4.88606	1.40458e-13	4.03292e-15
9624	2.78871	-0.756132	4.11271	1.67039e-08	2.01674e-09
9625	2.18214	-0.899605	2.60782	0.000361351	0.00021278
9627	-2.02365	-0.539563	-1.97586	0.000629431	0.000393894
9629	-0.135787	-3.28319	2.73026	0.00034453	0.000201172
9641	2.10811	-3.07169	5.28624	0.000329709	0.000190034
9644	-1.23945	-3.82818	3.83475	5.50743e-10	4.27737e-11
9646	-2.3436	-0.257856	-2.08319	3.61804e-05	1.64e-05
9647	2.97663	-2.84964	5.73154	1.8275e-11	9.50526e-13
9657	0.0892947	2.54844	-2.31205	0.000188446	0.000102805
9659	0.882323	-3.90429	4.99498	8.16446e-13	2.53638e-14
9662	-3.44085	2.12464	-5.56548	2.23035e-06	7.39602e-07
9673	-4.50444	1.7164	-5.86249	2.29139e-08	3.32734e-09
9684	0.192753	-4.69021	4.47957	3.75217e-11	2.04872e-12
9692	0.0815262	-1.95125	1.73283	0.000366687	0.000216525
9693	0.337563	-3.97068	4.53339	3.20686e-12	1.32833e-13
9694	0.0435994	-4.40611	4.45483	1.62669e-12	6.20201e-14
9696	1.71697	-0.408298	2.10404	0.00380922	0.00291403
9709	-4.38403	-1.11726	-3.50376	2.29139e-08	3.32734e-09
9712	-0.979267	-3.98122	2.04	6.40763e-05	3.06131e-05
9724	-0.471123	-4.20763	3.53622	7.65944e-15	1.5683e-16
9733	0.806009	2.95971	-1.9714	6.1944e-07	1.50742e-07
9736	-0.467731	-4.299	3.70311	2.86013e-07	6.62359e-08
9748	3.29371	-4.16628	6.44211	2.66104e-33	2.07526e-36
9749	-1.23287	-3.4447	1.51444	0.000412092	0.000244695
9750	1.16612	-2.91139	4.35294	2.44591e-08	3.58627e-09
9751	0.539752	-2.83412	3.37387	0.00380922	0.00291403
9758	-3.85251	-2.63335	-1.4862	0.000132718	6.88419e-05
9769	0.671139	-1.86475	2.37744	0.000454002	0.000274392
9770	-2.02888	-4.12805	1.77207	0.000274619	0.000155115
9773	-0.243335	-4.67312	3.85924	2.18588e-09	2.20382e-10
9774	-0.444981	-3.89064	3.61764	7.21032e-10	5.80356e-11
9781	-1.65316	0.730226	-2.01847	0.000361351	0.00021278
9782	-2.36105	-4.10377	1.85773	0.000774659	0.000495534
9791	0.634798	-3.37052	3.97313	2.39311e-10	1.75723e-11
9801	2.35363	-0.810653	2.72596	5.57556e-09	6.04927e-10
9812	-0.893221	-3.75925	2.89059	2.29139e-08	3.3236e-09
9814	-0.142255	-3.87762	2.94158	0.000538647	0.000330363
9824	-0.531044	1.50666	-3.01181	0.000136633	7.17414e-05
9835	0.571984	-4.09419	5.25909	2.09505e-05	8.87523e-06
9838	-2.53631	-0.269435	-2.05686	0.00167348	0.00117644
9845	-4.53383	0.150882	-3.73534	5.62318e-07	1.34856e-07
9850	0.0510167	-3.3166	2.79657	2.85422e-05	1.24541e-05
9852	-1.33738	2.22825	-2.70657	0.000136483	7.10844e-05
9860	0.711482	-3.02929	3.76077	0.000184466	9.86365e-05
9867	-2.73669	1.87996	-3.48084	0.00615766	0.00490555
9873	-1.44472	2.15049	-3.4645	7.9338e-07	1.95945e-07
9888	1.47186	-2.9431	2.9097	0.0024983	0.00182978
9890	-4.77529	-3.11123	-1.9962	7.28234e-10	5.87866e-11
9906	3.75901	1.82975	1.87553	0.000546951	0.000337516
9909	-4.33461	1.33226	-5.93007	1.62669e-12	6.20201e-14
9910	0.634407	-4.50408	5.1516	2.23035e-06	7.39602e-07
9917	1.10891	-4.10636	5.21527	1.07512e-15	1.91192e-17
9935	-0.239068	2.41279	-2.75697	1.31525e-06	3.51951e-07
9944	0.618949	2.98315	-2.36278	0.0024983	0.00182978
9946	-2.63574	1.81795	-4.45369	7.9338e-07	1.99419e-07
9952	1.52323	3.0617	-2.34668	0.00125099	0.000857939
9954	-2.62052	-3.60163	2.77695	0.00263454	0.00194382
9956	-0.846657	2.60919	-3.0216	0.000276573	0.00015713
9957	2.0496	3.66102	-1.61142	0.000546951	0.000337516
9960	1.23588	2.96184	-1.4965	0.000124214	6.41681e-05
9963	1.93143	3.37946	-1.6906	0.00117321	0.000794384
9966	0.950087	3.27082	-2.83463	3.13597e-05	1.40524e-05
9967	1.27057	2.02458	-1.40659	0.00993729	0.00829316
9971	0.855722	2.58611	-1.78009	0.000668653	0.000421272
9990	0.0540189	1.85657	-2.48874	0.000994556	0.000662413
10002	-3.95867	-2.1145	-1.80109	3.05646e-05	1.35605e-05
10003	-2.98987	-4.40663	1.82989	0.00861307	0.00710492
10004	3.39241	-2.71116	5.53234	2.23035e-06	7.39602e-07
10005	-0.12427	-4.68777	4.61597	2.23035e-06	7.39602e-07
10006	2.58965	-3.48398	6.21833	6.35463e-18	7.02913e-20
10008	3.22786	-0.262063	3.02535	3.13597e-05	1.40524e-05
10031	-0.974132	-4.22467	3.51183	1.01106e-07	1.75848e-08
10047	-0.808165	-4.19072	3.24896	2.23035e-06	7.39602e-07
10088	-3.50136	-0.446659	-2.81448	2.38215e-07	5.38772e-08
10093	0.677673	-3.19759	4.63825	1.40458e-13	4.03292e-15
10108	-1.59131	-4.46253	2.20761	0.00089171	0.000577964
10111	-0.519878	-2.534	2.98293	0.00279882	0.00207754
10114	-4.26107	1.47188	-4.44323	0.000274455	0.000154765
10125	0.610491	-4.11001	4.15913	2.87979e-06	9.83425e-07
10127	0.0995854	-3.555	4.31114	1.66872e-07	3.06332e-08
10134	0.976084	-4.00609	5.4747	1.96946e-05	8.17635e-06
10149	-3.73567	-1.60458	-2.52741	1.07786e-07	1.8848e-08
10151	0.218684	-2.52128	2.64768	0.00893914	0.00738863
10156	2.21329	-3.04322	4.32663	9.53149e-09	1.09245e-09
10160	-1.56227	-4.93561	3.7464	1.66013e-07	3.02801e-08
10169	1.83455	-1.43158	3.00897	0.000988812	0.00065348
10170	0.697499	-1.89983	3.55375	7.9338e-07	1.99419e-07
10174	0.511364	-3.56053	1.58824	0.00158868	0.00111458
10193	-0.976474	-3.68072	1.7115	0.000135848	7.06894e-05
10205	0.134713	-3.67294	3.9288	0.00993729	0.00829316
10209	-4.67325	-3.54659	-1.54097	0.000166197	8.85548e-05
10216	0.129294	-4.50392	4.34648	7.76423e-06	2.95841e-06
10220	-0.339698	-3.47486	2.74667	0.00251473	0.00184418
10234	0.285232	-2.922	2.73725	0.00826945	0.00681174
10235	-0.72829	-4.63973	3.72729	2.18588e-09	2.20382e-10
10238	1.33912	-3.52974	3.83143	9.29768e-05	4.62367e-05
10246	-0.139064	-1.53591	2.44948	0.000293038	0.000167312
10270	-0.355421	-3.86493	2.57065	0.000188446	0.000102805
10274	-4.69411	-1.85502	-2.76257	2.23217e-07	4.98547e-08
10275	2.96875	-0.959702	3.6405	0.000538647	0.000330363
10294	-1.0486	1.04567	-2.11623	0.00140434	0.000971368
10299	1.94035	-0.380477	2.61832	0.00342776	0.0025928
10301	2.96842	-1.71029	3.59995	0.000988812	0.000656027
10318	-1.00227	-4.32034	3.22273	6.62096e-11	3.8021e-12
10330	-0.202058	1.7317	-1.76631	0.00529918	0.00416163
10341	-3.98251	1.04906	-5.03491	0.000163292	8.68536e-05
10343	-4.5246	0.253252	-4.14341	0.0024983	0.00182978
10366	-0.706659	2.59843	-2.65465	0.0024983	0.00182978
10367	2.01556	-0.515173	2.78089	0.000668653	0.000421272
10383	-1.76814	-4.40521	1.92213	0.00142148	0.000986239
10405	-4.41721	-0.977891	-1.66652	0.00713042	0.00576106
10427	-0.756187	1.54186	-2.4102	4.17267e-06	1.4792e-06
10434	-3.30451	-2.1098	-1.62397	0.000811162	0.000523275
10462	-0.874942	0.952345	-1.89861	9.29768e-05	4.62367e-05
10469	-4.08767	-0.82635	-3.0368	2.23217e-07	4.98547e-08
10490	0.761615	-2.6853	3.48926	3.90894e-06	1.36707e-06
10493	2.60489	-2.8601	4.37891	2.23217e-07	4.98547e-08
10498	0.350418	2.35668	-2.00627	0.000256617	0.000144222
10500	0.199118	1.85313	-1.78034	0.000234386	0.000129467
10501	0.534776	2.67464	-1.52273	0.00415953	0.00321093
10503	0.71494	2.42568	-1.53067	7.76423e-06	2.95841e-06
10506	0.425665	2.34626	-1.70549	0.000537067	0.000329015
10507	-1.16213	2.29836	-3.45922	3.05646e-05	1.35605e-05
10508	-0.617046	1.4051	-2.02467	0.00159784	0.00112214
10513	0.325205	1.96411	-1.863	0.000467626	0.000283833
10516	2.90568	-0.570867	2.99345	5.64779e-12	2.39257e-13
10533	-0.815993	-2.60187	2.31393	0.0090405	0.00748517
10547	1.34893	-0.71342	1.88322	0.00158868	0.00111458
10549	-0.51078	-4.69063	3.73808	1.30315e-08	1.54268e-09
10551	-3.7109	2.86054	-6.77752	0.0024983	0.00182978
10558	-0.337868	-1.86347	1.93892	0.00475408	0.00371577
10559	0.0906531	-3.94204	3.47368	7.76423e-06	2.95841e-06
10561	-0.382061	2.85448	-3.22518	3.05646e-05	1.35605e-05
10562	0.973226	-4.16603	5.6896	7.47914e-17	1.09133e-18
10566	-1.76144	1.88553	-2.11952	4.07999e-05	1.86764e-05
10568	-1.62214	-3.62924	1.48328	0.0028061	0.00208559
10571	-1.99277	-4.10096	1.81853	7.59554e-05	3.71464e-05
10572	0.772434	-1.80221	2.33904	3.71836e-06	1.29604e-06
10585	-0.924034	-3.92255	2.79018	0.000235529	0.000130819
10586	-0.561278	-3.70666	1.90791	0.00107479	0.000718634
10589	0.705051	-3.7721	4.33025	2.44457e-10	1.81804e-11
10592	-2.63333	0.861241	-3.41941	2.09505e-05	8.87523e-06
10598	0.383219	2.17699	-1.50778	4.74948e-05	2.21881e-05
10599	-1.57772	0.346428	-1.90086	1.68352e-05	6.91366e-06
10604	0.341222	-1.65077	2.55464	4.40242e-05	2.02145e-05
10610	-1.20088	-4.4562	3.10072	9.34912e-11	5.47877e-12
10611	0.396674	2.19062	-1.79394	0.00529918	0.00416177
10614	-3.5149	-1.97655	-1.92353	2.74382e-07	6.32195e-08
10615	-3.29143	0.267392	-3.73766	0.000235529	0.000130819
10628	-1.89835	-0.369896	-1.62841	0.000308307	0.000176538
10633	1.36539	-2.98422	3.68314	2.23217e-07	4.98547e-08
10636	-3.38159	-2.01302	-1.95909	0.000188446	0.000102805
10637	-4.38801	-2.70425	-1.94257	0.000627574	0.000392437
10639	2.63006	-1.23448	2.47282	0.00615766	0.00489307
10646	0.327969	-4.20256	3.2221	1.24139e-05	4.88786e-06
10647	0.734584	-3.2233	4.17353	1.64141e-13	4.79019e-15
10648	0.17561	-3.93922	4.15475	4.17267e-06	1.49564e-06
10649	1.20806	-3.97712	5.15031	4.21397e-08	6.65468e-09
10650	1.31252	-2.68356	3.62391	6.87819e-05	3.32821e-05
10653	-0.495385	2.84018	-3.13655	4.17267e-06	1.4792e-06
10654	1.76679	-1.30959	1.66157	0.00117321	0.000794384
10655	1.55982	-4.15759	5.88523	2.18588e-09	2.20382e-10
10656	2.34149	-4.02278	6.41172	1.62669e-12	6.20201e-14
10657	0.430997	-4.11009	4.62634	5.84873e-15	1.18379e-16
10658	0.396447	-3.3716	3.2309	2.71027e-08	4.01852e-09
10660	-0.13679	-1.65583	1.9336	2.23035e-06	6.48832e-07
10661	-2.30187	-4.66558	2.14295	0.000244082	0.000136086
10662	-0.570335	-4.11701	3.1981	6.62096e-11	3.77838e-12
10663	0.693584	-4.49117	5.17111	2.23035e-06	7.39602e-07
10664	-0.866516	0.597257	-2.50493	0.00385968	0.00296311
10670	0.416317	-3.33677	3.6778	5.22164e-09	5.62841e-10
10676	-3.57072	0.161026	-4.15828	1.21296e-08	1.40736e-09
10683	-0.163915	-2.30188	2.0971	0.0034828	0.00264198
10713	1.10111	-4.90592	6.23092	2.23217e-07	4.98547e-08
10715	-1.61472	-5.29297	3.07346	7.76423e-06	2.95841e-06
10720	-4.41368	-2.34009	-2.16387	0.000628654	0.00039326
10722	0.69348	2.69974	-2.37696	1.67676e-06	4.59497e-07
10729	-0.611245	-4.13022	3.43307	0.000366687	0.000216525
[truncated: 1,547 more rows]

## Sheet: 019
dmr_id	median1	median2	median_change	padj	pval
9	3.16189	-3.96072	7.48143	3.77572e-05	1.40524e-05
13	-0.428862	0.877253	-1.46357	0.00906483	0.00710492
15	1.94382	-0.862058	2.39143	0.000407633	0.000208058
18	-3.70797	-0.220819	-3.02685	0.00607731	0.00451305
27	-1.02136	1.91174	-2.72263	1.94024e-07	2.32914e-08
29	-3.60585	-0.019499	-3.45461	1.29444e-05	4.0974e-06
39	-0.790997	1.2327	-2.11174	0.00759089	0.0058183
78	0.720416	2.30798	-1.64484	1.61108e-05	5.2938e-06
85	-4.09867	1.89027	-5.59869	0.000315273	0.000155115
104	-3.47824	0.25053	-3.87891	3.4341e-08	3.32734e-09
106	2.12471	-4.57568	5.79857	1.48668e-30	3.25668e-34
110	3.08686	-4.43889	7.17752	3.56092e-10	1.35811e-11
119	1.22427	2.61533	-1.47702	0.000873739	0.000495534
123	-1.65038	-3.91783	2.26745	2.90059e-06	7.39602e-07
124	-0.474142	-4.29763	3.38309	2.90059e-06	7.39602e-07
133	-3.75409	2.24768	-5.16636	3.22361e-07	4.98547e-08
135	-4.01897	1.7754	-6.11286	3.59302e-09	2.20382e-10
136	-1.54361	2.43158	-4.50368	3.4341e-08	3.32734e-09
139	0.671126	2.68714	-1.99674	0.00477917	0.00342551
146	2.11946	-3.48677	5.22894	2.90059e-06	7.39602e-07
150	-2.16378	-4.14411	1.9314	1.13203e-05	3.54363e-06
151	-0.999624	-4.08839	3.41354	0.000158749	7.17414e-05
153	0.567121	-2.21679	1.61099	0.00221829	0.00143302
156	-2.05334	1.75154	-3.61006	0.00431988	0.00308022
166	-4.34624	-0.648253	-3.37987	3.14804e-07	3.99281e-08
175	0.274806	-4.33748	4.16221	6.79314e-10	2.90178e-11
179	3.29745	-2.43494	5.31915	5.97221e-07	9.97093e-08
181	-2.55577	-0.16697	-2.74628	0.000465783	0.000241003
182	-3.55981	1.38519	-5.29129	2.90059e-06	7.39602e-07
187	-1.74024	2.28704	-3.9828	9.18934e-08	9.92408e-09
190	-0.971987	1.79019	-2.73306	0.00557664	0.0040704
209	-3.93191	0.506968	-4.48872	5.97221e-07	9.98203e-08
216	-2.78831	2.40895	-4.52797	0.00732665	0.00555959
221	-3.50538	-0.626527	-2.5033	0.00280333	0.00187728
230	-4.41192	0.0211984	-3.16006	0.00174138	0.00107878
241	-4.20675	-2.27839	-2.12275	0.00359176	0.0024863
242	0.539473	-3.38881	4.01766	0.00100243	0.000577964
244	0.288097	1.72654	-2.53373	0.000140431	6.22017e-05
249	-2.39258	-0.166517	-2.26665	0.00111164	0.000646216
265	0.0125216	2.1645	-1.95187	0.000836214	0.000468756
287	-0.437836	1.91069	-2.69934	1.58405e-05	5.17722e-06
291	-3.97832	-1.90532	-1.88974	0.00732665	0.00555959
293	-1.88319	-4.66381	3.09751	8.70725e-07	1.4973e-07
295	0.251135	2.9172	-2.13365	0.00221829	0.00143302
298	0.637147	-2.5445	2.97157	0.0041255	0.00291403
311	-0.816864	2.14032	-2.77555	0.000833279	0.000466563
320	-1.35073	1.77714	-2.36222	0.00331095	0.00224768
322	-2.10812	2.10737	-3.28273	0.00200974	0.00127452
327	-2.73044	2.08917	-3.91048	5.14329e-05	1.96718e-05
334	-2.83075	0.966692	-3.19684	5.89921e-06	1.69029e-06
336	-4.16608	1.46199	-4.78244	2.90059e-06	5.98256e-07
338	-1.21387	0.9587	-1.89131	0.000161223	7.28949e-05
344	0.545823	-2.6218	2.96652	0.000157953	7.06894e-05
345	-2.36104	2.2436	-3.38953	0.000131468	5.73101e-05
357	-3.55141	-0.830746	-2.17604	0.00274316	0.00182978
358	-0.754757	2.38784	-2.60309	0.00732665	0.00555959
360	2.96743	-2.73419	4.86285	0.00010758	4.53179e-05
363	-1.88238	0.401593	-2.00997	0.00177904	0.00111458
372	-3.22356	-0.839468	-2.54658	0.000516724	0.000274945
381	2.45426	-2.81686	5.23079	6.46354e-08	6.65468e-09
382	-4.23409	-2.63277	-1.80096	0.000114421	4.95534e-05
386	-3.40715	2.28089	-5.26895	2.90059e-06	7.39602e-07
395	-2.34385	1.56894	-3.79387	1.11153e-06	1.99419e-07
403	-3.79798	-2.01389	-1.59149	0.00655174	0.00490555
405	-0.78567	-3.4861	2.49245	6.94962e-06	2.01562e-06
409	-0.296065	-3.639	3.35879	0.000423347	0.00021784
412	-0.840752	-4.16004	3.31929	4.21962e-08	4.18727e-09
418	-0.42986	-2.12973	2.4879	8.2825e-05	3.40009e-05
419	-0.798142	-3.75436	3.53053	1.82367e-06	3.51951e-07
420	-3.22575	-4.99169	1.53406	2.06549e-05	7.03126e-06
427	-1.47639	1.62346	-2.31816	0.000109193	4.62367e-05
431	1.48783	-0.90682	1.9894	0.00264144	0.00173878
436	-0.77906	1.95878	-2.86236	3.69133e-05	1.35605e-05
439	0.474327	-1.26116	1.85229	5.54409e-06	1.56789e-06
446	-3.74003	-1.57575	-1.70872	0.00221606	0.00141168
452	-0.361544	2.01981	-2.44287	0.00331095	0.00224768
454	-0.686752	1.14641	-1.54085	0.0041255	0.00291403
467	-0.967855	1.59976	-2.93097	2.90059e-06	7.39602e-07
469	-1.13966	1.7331	-2.96314	0.000873739	0.000495534
472	-1.85859	0.82511	-2.81424	0.00158085	0.000971368
474	-2.15997	1.18136	-3.49699	0.000677416	0.00037128
475	-0.117588	-2.62572	2.04242	0.000516724	0.000274495
483	-1.17212	0.666537	-1.58071	0.000516724	0.000274945
495	0.0427142	2.04632	-2.14584	0.000269256	0.000129467
496	-1.94659	1.486	-2.81251	0.00337305	0.00231643
499	-1.09004	2.14573	-3.20121	0.00337305	0.00231643
502	-0.331983	1.70723	-3.04544	0.00041155	0.000210508
513	-0.2966	2.5442	-2.50333	9.63277e-06	2.93044e-06
514	1.65192	-1.52365	3.17557	5.29682e-06	1.49564e-06
531	-3.3005	1.32451	-4.53203	6.90386e-12	1.20988e-13
536	0.695127	3.5355	-2.77655	0.00111164	0.000656027
541	0.829252	-3.34938	2.78254	0.00244957	0.00159316
543	2.03665	-3.58061	5.63133	3.22361e-07	4.98547e-08
545	-3.99253	0.0240458	-2.86789	0.000956714	0.00054825
550	-1.13754	-4.48796	3.18608	8.70725e-07	1.4973e-07
557	-3.69213	2.24203	-5.35554	3.4341e-08	3.32734e-09
560	-2.1787	2.26019	-3.52355	5.89921e-06	1.69029e-06
562	-0.605366	3.11757	-2.96012	3.77572e-05	1.40524e-05
563	-1.18921	2.599	-3.86558	2.90059e-06	7.39602e-07
568	-4.32117	-2.38004	-1.89794	0.00121233	0.000718634
575	-2.75286	0.979931	-3.57499	3.22361e-07	4.98547e-08
577	0.545564	-2.56164	3.21713	2.73104e-05	9.72166e-06
581	-3.92521	-2.86953	-1.64191	4.70094e-05	1.77328e-05
592	-3.26877	0.0374416	-2.40877	0.00832418	0.00640223
593	-4.2934	-0.993727	-3.2622	4.38477e-09	2.75669e-10
599	-1.04317	2.91404	-3.6928	5.97221e-07	9.97093e-08
602	-4.15969	-2.5014	-1.44988	5.17512e-05	1.98276e-05
606	0.720472	1.9646	-2.06104	0.000216927	0.000101454
608	-0.62371	1.94314	-3.14303	0.00200974	0.00127452
610	3.32661	-3.3616	6.61245	3.56092e-10	1.45089e-11
612	1.00003	-0.919679	1.77272	0.00141186	0.000857939
614	-4.40471	-1.12221	-3.43463	7.38056e-05	2.96865e-05
619	0.509017	2.57029	-1.81227	0.00015499	6.90921e-05
620	0.257886	-3.34279	3.59327	0.000335286	0.000167312
627	-0.11755	2.04691	-2.02777	0.00268041	0.00176678
628	-5.09349	-2.37639	-2.78526	2.90059e-06	7.39602e-07
630	-1.12901	0.426042	-1.40575	0.00131916	0.000794384
634	-2.40909	1.90311	-4.25775	0.00177904	0.00111458
638	-1.64548	2.3337	-3.70643	0.0037912	0.00264198
645	0.252105	2.38676	-2.57237	3.4341e-08	3.32734e-09
653	-2.85918	1.06306	-3.71564	3.22361e-07	4.98547e-08
656	-0.821807	0.831832	-1.57445	0.00160163	0.000986239
657	-0.426836	2.03771	-2.38471	6.02312e-05	2.36175e-05
658	0.481206	2.54983	-2.26498	5.67761e-05	2.21881e-05
659	-3.34051	0.673771	-3.52295	3.4341e-08	3.32734e-09
660	-0.388336	2.624	-3.25506	0.00997436	0.00786587
661	0.355376	2.38713	-2.3135	6.31244e-07	1.0606e-07
665	2.96924	0.988276	1.83852	0.000158749	7.17414e-05
669	-2.54247	0.377184	-2.12514	0.00719146	0.0054129
678	-3.3258	0.796296	-4.30731	1.92796e-07	2.29328e-08
679	-0.952321	1.8455	-2.60751	1.22318e-06	2.22932e-07
685	-0.718117	2.00965	-2.91324	5.29682e-06	1.4792e-06
687	-0.0536651	2.21248	-1.9116	0.000260418	0.000124818
689	-0.241311	2.44677	-2.70391	0.000335286	0.000167312
692	-1.65174	2.47453	-4.12627	0.000217069	0.000102805
697	0.0604969	2.84908	-1.98152	0.00501092	0.00363662
699	-0.582652	1.6242	-2.62582	3.71872e-06	9.87313e-07
701	2.73722	1.0345	2.08044	0.00417617	0.00296311
702	-0.219872	1.89803	-2.14038	0.00732665	0.00555959
708	0.835506	-1.26944	2.23028	0.000217069	0.000102805
709	-3.75228	1.71691	-5.20849	3.22361e-07	4.98547e-08
713	-0.0114417	-4.30602	4.32877	1.2125e-05	3.81148e-06
720	-0.878807	2.85986	-3.50253	0.000873739	0.000495534
732	-4.23446	-2.76656	-1.74033	0.000120018	5.20821e-05
736	-3.09047	0.216395	-3.19514	0.000114421	4.89183e-05
751	-0.992705	2.42475	-2.7222	0.00307622	0.00207754
761	2.39856	-2.43667	4.44628	7.13664e-16	4.36533e-18
766	-3.83364	-2.30427	-1.56722	0.00246622	0.00160453
789	-1.24263	2.65759	-2.56899	0.00039448	0.000201172
795	-1.66033	1.68132	-3.32757	0.000516724	0.000274392
804	-3.35652	1.2798	-3.89449	0.00501092	0.00363662
806	-2.75647	2.43	-4.07466	3.68723e-08	3.58627e-09
807	-0.930194	1.67293	-2.8146	0.00111164	0.000646216
822	-4.40595	-2.14481	-2.06463	3.93586e-05	1.47002e-05
830	-2.17208	2.02043	-4.18436	3.59302e-09	2.20382e-10
835	0.645299	2.62312	-1.83371	0.00753991	0.00576106
839	-3.97563	2.39623	-5.85754	3.59302e-09	2.17443e-10
840	-2.19012	-4.49685	2.47555	3.16063e-05	1.13591e-05
844	-3.21884	2.95541	-5.53128	3.90914e-11	9.50526e-13
850	1.70309	0.0612553	2.03654	0.00871757	0.00681174
867	-3.7456	-0.310194	-3.23573	2.78155e-11	5.60576e-13
869	-0.438032	2.17338	-2.35778	4.89561e-05	1.85958e-05
878	-4.16436	1.12387	-5.06632	3.4341e-08	3.32734e-09
888	-1.06167	2.66801	-3.57738	3.72529e-12	6.20201e-14
895	0.546509	-3.43113	3.24276	0.000833279	0.000466563
902	-4.42073	-1.85967	-2.43312	5.97221e-07	9.97093e-08
906	-1.13376	1.87883	-3.38638	0.000294443	0.000144222
915	-0.0863701	2.55296	-2.92372	2.90059e-06	7.39602e-07
925	-1.05096	2.0394	-2.23532	2.57396e-05	9.10047e-06
926	-2.03568	1.5929	-3.27448	0.000873739	0.000495534
935	-4.27389	-1.56045	-2.05683	0.00111164	0.000648726
941	-2.093	1.55943	-3.62374	2.90059e-06	5.98256e-07
945	-1.4902	0.902748	-2.16349	2.90059e-06	7.39602e-07
946	-0.626229	0.425135	-1.58576	0.00031484	0.000154765
948	-2.27376	0.240049	-2.88921	0.00111164	0.000656027
949	-0.575021	1.66088	-2.57405	6.92634e-06	1.99673e-06
958	-4.21479	1.04929	-5.31864	2.77597e-14	2.61483e-16
960	-1.74371	-3.95275	2.03122	1.11153e-06	1.96306e-07
962	-3.88401	-1.94318	-2.69139	0.00373027	0.0025928
993	-2.81661	0.148198	-2.91544	1.11153e-06	1.99419e-07
1004	-0.540915	2.86404	-3.65596	0.000217069	0.000102805
1018	0.335843	3.20878	-2.61004	0.00488508	0.00351854
1025	-4.38741	0.602876	-4.59184	3.56092e-10	1.45089e-11
1045	-4.48462	-2.07663	-2.06849	0.000516724	0.000274945
1050	-3.11379	0.595729	-3.04442	1.50681e-07	1.74612e-08
1054	-2.32656	2.35271	-3.19167	0.000611015	0.000328998
1064	-3.81695	-1.05925	-2.30351	2.71049e-06	5.38536e-07
1067	-0.123617	1.58009	-1.51045	0.00274316	0.00182978
1074	-2.82502	3.42938	-5.99221	2.90059e-06	7.39602e-07
1075	0.441368	2.59613	-1.55563	0.000689655	0.000379499
1076	-1.70885	-0.188862	-2.25834	0.00753991	0.005761
1077	-0.272252	1.92302	-2.1665	2.84748e-09	1.42842e-10
1078	-1.45455	2.45215	-3.8471	3.4341e-08	3.32734e-09
1080	0.300866	2.25046	-2.45558	0.00337305	0.00231643
1082	-3.79425	-0.0839759	-2.48869	0.000556714	0.000297687
1084	-2.50803	1.73527	-4.46641	1.58405e-05	5.17722e-06
1091	-4.46623	-0.624464	-3.79147	9.55285e-09	6.5016e-10
1095	1.96485	-2.1096	2.721	8.86683e-06	2.64354e-06
1098	-4.40045	-2.70046	-2.26864	0.00128847	0.000769977
1099	-4.20944	1.53923	-4.97412	3.72529e-12	6.20201e-14
1100	-3.82745	-0.102986	-3.70195	0.000217069	0.000102805
1101	-3.98483	2.58372	-6.46194	3.06838e-13	4.03292e-15
1118	-4.21081	2.17459	-5.9701	2.90059e-06	7.39602e-07
1120	-0.0530749	1.86538	-2.76351	2.90059e-06	7.39602e-07
1125	-0.100206	2.39531	-3.01464	3.4341e-08	3.32734e-09
1132	-3.86341	0.812198	-4.49582	7.13664e-16	4.13548e-18
1148	0.331046	-3.00181	3.63419	3.32064e-06	8.55438e-07
1152	-4.16812	-1.10113	-1.41621	0.00997436	0.00786587
1154	-2.47783	2.32644	-4.50678	0.000516724	0.000274392
1160	-0.432148	1.30933	-2.45765	0.000216927	0.000101454
1162	-0.372465	2.55	-2.7655	6.90541e-12	1.2404e-13
1164	-4.19131	-1.40402	-2.73425	0.000335286	0.000167312
1169	-0.666136	1.55391	-2.08645	1.54946e-07	1.81251e-08
1188	-1.53477	1.22869	-2.28303	0.000689655	0.000379499
1189	0.237893	1.61055	-1.48319	8.97689e-05	3.71464e-05
1191	-1.92895	2.79149	-4.14596	3.22361e-07	4.98547e-08
1197	-3.07745	1.5958	-4.91379	3.4341e-08	3.32734e-09
1205	0.487233	2.19075	-1.8138	2.35923e-07	2.85794e-08
1207	-0.0607551	1.51278	-1.45809	0.000173462	7.93783e-05
1215	-2.15332	0.451214	-2.66138	3.22361e-07	4.29746e-08
1216	0.650119	3.10536	-2.51207	0.000217069	0.000102805
1231	-0.353383	1.56303	-1.60882	0.000611847	0.000329848
1233	-0.168273	2.83476	-2.8153	0.00039448	0.000201172
1235	-0.999233	1.68967	-2.37665	0.000223184	0.000106239
1238	0.292381	-4.78763	4.62707	8.50109e-06	2.53263e-06
1239	-1.48155	1.71547	-3.35783	3.56092e-10	1.30277e-11
1243	1.19957	2.6417	-1.40513	0.00111164	0.000656027
1251	0.470508	2.20147	-1.93343	0.00417721	0.0029666
1252	-3.69541	-2.23321	-1.87978	0.000335286	0.000167312
1265	0.212613	2.14634	-1.85048	1.7622e-05	5.83283e-06
1273	-3.84128	-0.855963	-3.22989	1.07081e-05	3.34026e-06
1276	0.0917813	2.39986	-2.22488	0.0041255	0.00291403
1277	-0.847771	2.08077	-3.10491	0.00141186	0.000857939
1281	3.17783	-3.54045	6.61159	3.22361e-07	4.98547e-08
1286	-3.00104	2.03375	-4.855	2.53697e-05	8.87523e-06
1291	-2.96331	1.85296	-4.43188	3.0001e-06	7.69575e-07
1296	-2.01914	0.789871	-2.82595	0.00015499	6.90921e-05
1311	-0.895171	2.48484	-4.33156	2.90059e-06	7.39602e-07
1323	0.189997	2.3406	-1.76603	0.000135377	5.97259e-05
1324	-0.737174	1.68232	-2.52087	0.00682128	0.00511335
1329	0.920093	2.96057	-1.9831	0.00187271	0.0011827
1334	-3.14497	-0.340651	-3.06561	8.97689e-05	3.71464e-05
1345	-3.28973	-0.63169	-2.11965	0.00347424	0.00239353
1349	-2.28954	0.935781	-3.42933	1.23993e-08	8.8153e-10
1352	0.124439	1.65482	-1.46994	0.00221829	0.00143261
1369	-3.81802	0.416333	-4.13826	2.90059e-06	7.39602e-07
1383	-3.76472	-1.75208	-2.01264	0.00732665	0.00555959
1386	-4.33259	-2.56037	-1.77222	0.00501092	0.00363662
1394	-1.47481	2.99084	-4.78232	2.73104e-05	9.72166e-06
1419	-3.15452	-0.318051	-2.33793	0.00274316	0.00182978
1424	-2.78829	1.45832	-4.39373	5.97221e-07	9.98203e-08
1427	-0.143593	-2.95103	3.37298	0.00567119	0.00416177
1429	-2.74931	2.189	-4.79121	3.4341e-08	3.32734e-09
1437	-3.84607	0.307511	-3.95233	9.63277e-06	2.95841e-06
1439	-1.97668	1.70003	-3.32051	0.000516724	0.000274392
1445	-3.32796	-0.754217	-2.76241	0.00419346	0.00298365
1447	-3.10267	1.97962	-4.74849	2.90059e-06	7.39602e-07
1448	-2.63634	0.866643	-3.42885	3.51093e-09	1.85352e-10
1484	-0.490872	2.58	-2.90407	5.67761e-05	2.21881e-05
1498	3.10013	-0.220107	2.6276	0.00373027	0.0025928
1499	-2.58304	-0.478751	-2.31894	0.00010758	4.51018e-05
1504	-2.2983	-0.941559	-1.48553	0.000598234	0.000320282
1508	-4.15699	-2.41976	-1.40008	0.00624007	0.00464486
1513	-0.38432	-3.3424	2.28053	0.00131916	0.000794384
1520	-3.3214	-1.16647	-1.91336	0.000385718	0.000194338
1523	-4.03084	-0.760789	-3.73488	6.36992e-05	2.53262e-05
1525	-0.405874	1.27662	-2.22176	0.00359176	0.0024863
1531	-2.65393	0.206138	-2.98923	8.2825e-05	3.40009e-05
1550	-3.41134	1.9877	-5.32869	3.4341e-08	3.32734e-09
1554	-3.14635	-1.54992	-1.73211	2.03831e-05	6.87931e-06
1570	-2.70204	1.72426	-2.87421	0.000135377	5.97259e-05
1571	-0.311108	2.58184	-2.49823	0.00871757	0.00681174
1572	-2.7155	0.248783	-2.45209	9.38735e-05	3.89889e-05
1574	-3.91785	-2.3401	-1.7074	3.43539e-07	5.34311e-08
1579	1.09675	2.73734	-2.7356	0.00753991	0.00576106
1583	1.46824	2.7607	-1.60038	0.00832418	0.00640223
1585	-1.50477	-3.4459	1.60097	9.14343e-12	1.68247e-13
1600	-2.1842	2.04147	-4.45234	2.90059e-06	7.39602e-07
1612	0.609884	1.97743	-1.43473	0.000188265	8.68536e-05
1613	-1.21775	2.28235	-2.87789	0.000294443	0.000144222
1628	-2.28351	2.2714	-3.90493	0.00148004	0.000904561
1645	-0.475768	1.90454	-2.82753	0.000293435	0.000142315
1653	-4.18294	-3.33401	-1.62793	0.00753991	0.00576106
1670	3.23316	1.97672	1.61096	0.00501092	0.00363662
1684	-4.10426	-2.8885	-2.01775	0.00298899	0.00201274
1692	-0.687849	1.47626	-2.37333	0.00567119	0.00416177
1695	-2.92931	-0.855126	-2.04073	4.20328e-06	1.12609e-06
1699	-4.14731	-1.14026	-2.72796	0.000915931	0.000523275
1713	-3.87286	-0.989543	-2.69318	1.89886e-05	6.32676e-06
1728	-4.56737	-1.83281	-2.45951	5.97221e-07	9.97093e-08
1736	1.90758	-1.22485	3.27145	0.00871757	0.00681174
1740	-2.46228	-0.461814	-1.90571	0.00437429	0.00311998
1764	0.0667522	1.91593	-1.84917	0.000915931	0.000523275
1772	1.05091	-1.65017	2.15182	3.69133e-05	1.35605e-05
1778	-1.04868	1.39713	-2.31568	0.000188265	8.68536e-05
1800	-3.66267	-1.56319	-1.91277	0.000873739	0.000495534
1805	-1.73443	1.96338	-3.36549	1.61108e-05	5.2938e-06
1810	-1.47845	-4.28169	2.7983	0.00173263	0.0010726
1830	0.449156	-3.17877	3.66789	1.17292e-07	1.32756e-08
1847	0.248129	1.78226	-1.74631	2.55828e-05	9.01141e-06
1851	-4.41536	-2.51078	-1.42829	0.000149986	6.66313e-05
1855	2.10967	0.396283	2.366	0.00337305	0.00231643
1859	-4.54642	-1.82967	-2.90096	3.14804e-07	3.99281e-08
1861	0.619498	-1.26079	2.14807	0.000294443	0.000144222
1887	-3.76026	-2.41274	-1.52548	0.000294443	0.000144222
1895	-3.20617	-1.4566	-1.44822	0.000408009	0.000208339
1915	-3.01496	0.193558	-3.75528	3.77572e-05	1.40524e-05
1917	-3.28047	0.807888	-3.99181	0.000270833	0.000130819
1927	0.42354	-2.39011	1.93181	2.03831e-05	6.9298e-06
1929	-2.19051	-4.4594	2.12178	0.000249288	0.00011921
1930	-3.78711	-1.97896	-1.86917	0.00621842	0.00462465
1935	-2.54203	0.994801	-2.45094	0.00337305	0.00231643
1937	1.35043	-2.952	4.24745	5.29682e-06	1.4792e-06
1941	4.17322	-4.07126	5.58995	2.03831e-05	6.9298e-06
1942	0.760735	-4.31416	4.73371	3.56092e-10	1.41394e-11
1954	1.70606	-0.967639	2.6737	0.000691362	0.000380741
1955	0.252621	2.11246	-1.99714	7.71879e-06	2.2759e-06
1966	-0.176739	2.01343	-2.04841	0.00221829	0.00143261
1978	-3.75995	-1.67031	-2.08979	1.9703e-05	6.5691e-06
1983	-0.602294	-3.74303	2.61737	0.00832418	0.00640223
1985	-4.07647	-2.11627	-1.99305	3.86022e-05	1.43754e-05
1996	-1.29677	2.83018	-3.7868	2.90059e-06	7.39602e-07
2000	-1.62425	1.14184	-1.97508	0.00341536	0.00234923
2002	-3.04143	1.65092	-4.06563	8.17722e-05	3.32821e-05
2006	-3.73662	1.33672	-5.41265	2.90059e-06	7.39602e-07
2011	0.773509	2.6536	-2.25529	1.05393e-08	7.27248e-10
2016	-0.0188535	1.98031	-2.17313	2.89408e-05	1.03464e-05
2031	0.347346	-2.9453	3.38616	1.11153e-06	1.96306e-07
2032	-4.12338	-2.68073	-1.62609	4.67542e-05	1.75956e-05
2034	-4.216	-1.99266	-2.01636	0.00177904	0.00111458
2039	1.84816	-0.903148	2.65903	0.000177432	8.13506e-05
2044	0.919339	-3.43751	4.54878	3.39436e-10	1.14063e-11
2046	-1.66045	-4.34879	2.68834	2.90059e-06	7.39602e-07
2047	0.898852	-3.28447	3.74323	0.000294443	0.000144222
2058	1.37873	-3.60995	4.84952	8.51564e-09	5.76415e-10
2067	-3.48959	1.50103	-4.89178	2.90059e-06	7.39602e-07
2068	-4.26806	-2.24349	-2.40374	0.000269256	0.000129467
2069	-4.2572	-2.51966	-1.80886	9.54164e-08	1.03673e-08
2070	-3.76029	-2.21027	-1.48149	0.000245469	0.000117169
2080	3.25767	-0.3262	2.26164	0.00200974	0.00127452
2081	0.572347	-1.0288	1.46016	0.000186911	8.57782e-05
2086	-0.989664	-4.99456	3.42046	3.20083e-09	1.62243e-10
2097	-4.72094	-0.995428	-3.56528	3.30046e-10	1.08449e-11
2098	-0.729002	0.552077	-2.20385	1.79597e-07	2.11268e-08
2099	-2.72357	-3.99684	2.03733	0.00111955	0.000662413
2101	0.202842	-3.78125	3.62967	2.90059e-06	7.39602e-07
2120	-0.342565	-3.6712	4.03137	4.67542e-05	1.75956e-05
2124	-3.12349	0.223301	-2.96672	2.54355e-05	8.93724e-06
2127	0.57552	3.31756	-2.58726	7.63713e-06	2.24346e-06
2133	0.100187	-4.2609	4.16056	2.03831e-05	6.89758e-06
2135	-0.52599	-4.115	4.08256	3.56092e-10	1.20939e-11
2141	2.55223	-1.01942	3.32734	2.53697e-05	8.87523e-06
2144	0.195882	-3.97228	3.31728	0.000216927	0.000101454
2150	2.60075	0.0343768	2.59742	0.00080907	0.000451767
2159	-3.86944	-2.78923	-1.42755	0.000377341	0.000190034
2162	-3.92831	-0.215744	-3.97878	3.4341e-08	3.32734e-09
2166	1.09578	-4.43123	5.80035	3.31165e-09	1.74107e-10
2167	0.256438	-3.08001	4.44185	1.82069e-06	3.48983e-07
2168	-0.847633	-3.34042	3.10688	4.4941e-05	1.68738e-05
2170	2.29632	-0.351742	2.1863	0.00417617	0.00296311
2171	3.20931	-0.361665	3.00853	1.94024e-07	2.32914e-08
2185	0.417186	-4.12237	3.88197	1.69384e-10	5.04627e-12
2213	-0.614938	-4.08573	3.50614	0.000114421	4.95534e-05
2239	-3.91029	0.695191	-4.6011	2.90059e-06	7.39602e-07
2243	1.24718	-1.03256	1.5469	4.37484e-05	1.64069e-05
2265	-0.960937	1.55356	-2.98879	0.000963221	0.000553034
2279	-0.812599	1.8762	-2.48381	0.00041155	0.000210508
2280	-3.23719	0.162103	-2.36001	0.000873739	0.000495534
2286	-0.0192727	1.85717	-2.30763	2.90059e-06	7.39602e-07
2294	-2.45835	-0.00914005	-1.90393	0.000757703	0.000421923
2301	-1.96561	1.28459	-3.5266	0.00131916	0.000794384
2317	-4.58022	-1.02283	-3.18789	3.22361e-07	4.98547e-08
2340	0.464817	2.88806	-1.86881	0.000223184	0.000106239
2346	-3.62004	-1.49682	-1.91989	0.0085771	0.00660615
2361	-0.106032	2.22371	-2.01175	0.00580211	0.00426675
2365	0.801425	-2.25184	3.15954	7.63713e-06	2.24346e-06
2366	-0.151481	-3.0204	2.42359	0.00039448	0.000201172
2368	1.24538	-2.45428	3.87674	7.88129e-13	1.15673e-14
2369	1.19217	-3.76377	4.80556	3.22361e-07	4.98547e-08
2370	0.0123033	-3.13662	2.56927	9.63277e-06	2.95841e-06
2371	-1.26735	-3.40772	1.69742	0.00471763	0.00337313
2372	1.39674	-2.66358	3.44048	1.32474e-07	1.52062e-08
2378	-3.18269	0.274283	-3.05725	0.00732665	0.00555959
2381	0.657724	-2.86025	2.73597	7.24049e-05	2.89778e-05
2386	-4.6427	-2.15101	-2.21774	3.4341e-08	3.32734e-09
2395	-0.190698	1.17804	-2.11117	2.90059e-06	6.48832e-07
2404	-2.27325	1.74591	-2.97153	0.00171313	0.00105978
2405	-1.38069	1.85327	-3.23396	0.00221829	0.00143261
2407	0.926627	-1.71709	3.00557	1.17292e-07	1.33094e-08
2409	1.97805	-1.48873	3.05897	0.00337305	0.00231643
2416	-3.56239	-1.49092	-1.97316	4.25918e-05	1.59358e-05
2422	-4.27988	-1.48132	-2.79856	2.50264e-07	3.06457e-08
2434	-1.83277	2.5947	-3.58751	0.00488508	0.00351854
2438	-4.06041	-2.2254	-1.59222	0.00111164	0.000656027
2440	-3.74872	-2.35558	-1.40739	0.00049721	0.000258571
2446	-2.56918	2.91572	-4.71475	3.22361e-07	4.98547e-08
2462	-3.07335	2.357	-5.04603	0.0041255	0.00291403
2466	-4.77717	-1.76729	-2.71788	0.00141186	0.000857939
2471	-0.577208	1.72295	-2.82548	2.53697e-05	8.87523e-06
2473	-2.82008	1.28301	-3.78172	3.22361e-07	4.98547e-08
2474	-1.29294	2.5599	-3.50121	0.000516724	0.000274392
2475	-3.45521	2.20794	-5.22261	0.0041255	0.00291403
2476	-2.3887	1.9228	-3.60953	6.23842e-05	2.45847e-05
2477	-0.678365	1.63264	-2.37141	0.000236635	0.000112745
2478	-3.6937	-0.734363	-3.08476	0.000457095	0.000236308
2480	-2.10577	0.795543	-3.48483	0.00111164	0.000656027
2481	-3.02718	1.33603	-3.2511	0.000217069	0.000102805
2483	-3.0574	-1.17607	-2.0675	0.000270833	0.000130819
2488	0.336837	3.40885	-3.19163	1.58405e-05	5.17722e-06
2493	-0.73816	2.66374	-3.42358	5.29682e-06	1.4792e-06
2494	-3.29284	-2.19021	-1.43729	0.00374435	0.00260423
2497	-2.38026	2.03128	-4.33329	2.90059e-06	7.39602e-07
2503	-4.79799	-1.73245	-2.07522	1.35394e-05	4.29465e-06
2516	-3.51132	-1.84601	-1.46405	0.00952335	0.00748517
2521	3.2323	-0.66687	3.82843	2.90059e-06	7.39602e-07
2531	0.358936	2.17432	-1.81539	0.00417617	0.00296311
2554	-0.209811	1.68411	-2.27712	2.03831e-05	6.9298e-06
2556	-4.35799	-1.43975	-2.54284	5.85452e-05	2.28923e-05
2571	1.50887	-0.556284	2.31367	0.00256258	0.00167676
2575	-3.04172	0.703997	-3.51551	0.00177904	0.00111458
2578	0.178897	1.99466	-1.46526	0.00341536	0.00234923
2581	0.430669	2.81102	-3.1725	0.000154581	6.88419e-05
2583	-3.68005	1.36482	-4.93705	2.90059e-06	7.39602e-07
2586	-3.55636	-2.5281	-1.67618	0.000154581	6.88419e-05
2588	-1.90381	-0.154764	-2.2963	0.00580211	0.00426675
2608	-3.87907	-0.675209	-1.99484	0.00187271	0.0011827
2610	-1.09578	1.01645	-2.70744	0.000135377	5.97259e-05
2618	-1.66299	2.48688	-4.44	3.31165e-09	1.74107e-10
2623	-1.34164	2.94271	-3.34013	6.07285e-05	2.38923e-05
2624	-0.0714077	2.93664	-1.7131	0.000963221	0.000553034
2626	-2.20468	1.92788	-4.13256	0.000873739	0.000495534
2627	0.74788	2.81442	-2.37887	2.90059e-06	6.48832e-07
2628	-4.47863	-2.89272	-1.75293	2.54355e-05	8.93724e-06
2629	-0.0889685	2.03638	-2.08546	0.000377341	0.000190034
2631	-1.52306	-3.23457	1.70763	0.00256258	0.00167676
2643	-1.93209	2.13432	-3.89494	3.14804e-07	3.99281e-08
2645	-2.06154	2.79974	-4.74843	2.90059e-06	7.39602e-07
2646	-0.45149	2.0511	-2.80413	0.000135377	5.97259e-05
2651	-1.25895	2.31155	-3.65379	0.00607731	0.00448418
2652	-0.814694	1.80419	-2.04018	0.00039448	0.000200623
2660	-2.69852	1.89724	-3.95037	9.18934e-08	9.91721e-09
2680	-4.07616	-2.6034	-1.4437	0.00607731	0.00451305
2688	-1.99312	1.93819	-3.68299	2.90059e-06	7.39602e-07
2690	-3.49301	-0.312662	-3.07098	0.000109193	4.62367e-05
2701	-3.76324	-0.98272	-2.13073	3.58553e-06	9.47239e-07
2703	-3.80269	-1.22367	-2.05877	0.00759089	0.0058183
2704	-3.82771	-1.41023	-2.65325	5.67761e-05	2.21881e-05
2710	-3.7613	-1.70437	-2.66609	0.00010758	4.53179e-05
2722	-4.08401	-2.40178	-1.62772	0.00276499	0.00184858
2723	-0.231521	3.08619	-3.77267	2.03831e-05	6.9298e-06
2729	-1.44641	1.81315	-3.2247	2.90059e-06	5.96796e-07
2735	-0.594358	1.83955	-2.5428	5.63075e-06	1.59733e-06
2738	-2.24746	2.10038	-4.25987	2.90059e-06	7.39602e-07
2739	-1.1198	1.6657	-2.82038	2.90059e-06	6.48832e-07
2777	-4.47081	-2.59187	-2.10958	0.0052656	0.00382491
2779	-1.70932	2.64637	-4.88115	4.18427e-05	1.56463e-05
2787	-4.2337	-1.93403	-2.0408	2.68477e-07	3.317e-08
2793	0.291077	-2.20296	1.94077	0.00168731	0.00104122
2810	-4.17111	-2.71556	-1.61065	0.000191589	8.85548e-05
2816	-1.20132	2.66219	-3.40468	0.000516724	0.000274392
2821	-0.0634041	-3.83999	3.53993	2.95649e-10	9.64989e-12
2823	-1.08714	-3.64124	2.81768	0.000607411	0.000325461
2829	-1.21301	-4.74797	3.03594	1.39982e-07	1.616e-08
2844	-3.13541	0.0874102	-2.5996	0.00391241	0.00272969
2848	-3.1502	-1.45916	-1.53774	0.00122495	0.000726382
2878	-1.64947	1.0741	-2.77379	0.000109193	4.62367e-05
2883	-2.47077	0.947013	-3.50116	2.61296e-07	3.21683e-08
2886	-1.78506	-4.12229	2.74944	9.87791e-06	3.04452e-06
2887	-2.03446	2.08413	-3.05247	0.00100243	0.000577964
2890	-0.422932	2.1038	-2.02358	5.29682e-06	1.49564e-06
2894	-1.15412	2.84364	-4.27186	1.58405e-05	5.17722e-06
2895	-3.46287	-1.82122	-1.61255	1.50895e-05	4.8359e-06
2901	-3.77736	-2.16705	-1.61031	0.00171313	0.00105978
2908	-4.15858	1.41952	-4.38829	5.00857e-06	1.36707e-06
2918	0.431754	2.32019	-2.38141	0.000108273	4.56808e-05
2931	-1.66448	1.95103	-3.61377	0.00010758	4.53179e-05
2932	-2.58325	1.69302	-4.56181	2.90059e-06	7.39602e-07
2935	0.722236	3.1828	-2.46056	0.00200974	0.00127452
2936	-0.265633	-4.67508	3.93656	6.21115e-12	1.07488e-13
2938	-4.2191	-1.88052	-1.98919	0.000120018	5.20821e-05
2950	-4.37617	-2.17413	-1.62417	0.00337305	0.00231643
2953	-0.295997	-2.81515	2.30521	0.000548283	0.000292938
2960	-3.88857	-1.49452	-1.82615	0.00826074	0.0063444
2962	-0.354372	-3.42987	3.0755	4.70094e-05	1.77284e-05
2971	-2.95694	-1.76935	-2.04316	0.00871348	0.00671501
2983	2.8587	-3.03596	4.81811	7.09833e-06	2.0603e-06
2985	-3.58506	3.14344	-5.80245	3.59302e-09	2.20382e-10
2988	1.34246	3.36112	-1.64565	0.00732665	0.00555959
2991	-0.426241	2.50418	-3.01511	3.4341e-08	3.32734e-09
2993	-0.446091	2.89799	-3.56923	2.90059e-06	7.39602e-07
2996	-4.18097	-2.73733	-1.43853	0.00298899	0.00201274
2997	3.46244	-2.72052	5.8143	6.12945e-11	1.58439e-12
3003	-3.68859	-2.09212	-1.57211	0.00383203	0.00267193
3013	0.622182	-3.43676	3.61917	0.00711852	0.00535331
3014	2.20211	-3.07873	5.35002	6.21827e-09	4.04562e-10
3015	1.92709	-2.41434	4.30018	5.29682e-06	1.4792e-06
3016	0.346	-2.78348	4.42042	3.22361e-07	4.98547e-08
3039	3.23364	-3.23336	5.7974	9.68457e-07	1.68022e-07
3076	0.52476	2.38234	-1.85758	0.000217069	0.000102805
3082	-1.63965	-4.78736	2.38682	6.73006e-11	1.75439e-12
3086	-3.79901	-1.22195	-2.89978	0.00100243	0.000577964
3089	-3.15942	-0.919506	-2.07145	0.000217069	0.000102805
3093	0.157204	2.00776	-1.45261	0.0041255	0.00291403
3096	-0.23069	2.87561	-3.3954	2.90059e-06	7.39602e-07
3100	-4.23127	-0.366905	-4.03958	3.58553e-06	9.47239e-07
3101	1.42218	2.37507	-1.68246	0.00997611	0.0078738
3103	2.91396	0.216418	2.52804	2.53697e-05	8.87523e-06
3105	0.675897	2.44892	-1.80606	0.00502068	0.0036448
3107	-3.92967	2.19099	-5.83565	2.90059e-06	7.39602e-07
3116	-0.565757	-4.19376	3.76813	7.30081e-10	3.15062e-11
3121	-2.19989	-0.2	-1.88532	9.87791e-06	3.04452e-06
3135	-4.08838	0.777434	-4.57104	2.90059e-06	7.39602e-07
3146	-3.94704	-2.41956	-1.9922	0.000496271	0.000257974
3149	3.28131	-4.28281	6.89203	1.82367e-06	3.51951e-07
3152	0.16605	-4.47646	5.24337	3.59302e-09	2.20382e-10
3159	-3.50202	-1.52768	-1.97434	0.00111164	0.000646216
3162	-2.53167	2.24272	-4.15255	1.07081e-05	3.34026e-06
3165	-4.26536	-1.90704	-2.66418	1.07081e-05	3.34026e-06
3193	-0.117785	3.05071	-3.09704	0.00160163	0.000986239
3194	-0.853075	2.43349	-3.8927	0.000621024	0.000337516
3195	2.0618	-2.08247	4.14427	0.000414041	0.00021278
3196	0.215578	2.24993	-1.67874	0.000621024	0.000337516
3197	2.97579	-1.70705	4.82858	3.8112e-07	5.9944e-08
3209	0.316797	-5.67461	5.73856	2.90059e-06	7.39602e-07
3210	1.06071	-3.7093	4.32839	0.000443066	0.000228958
3211	-3.42806	1.56645	-3.55453	1.11987e-06	2.0165e-07
3226	0.0224613	2.06756	-2.20592	0.00759089	0.0058183
3235	0.575103	-2.95394	3.64117	2.90059e-06	5.98256e-07
3241	-3.96215	-1.36451	-1.9336	6.7547e-08	6.96925e-09
3245	-0.387172	1.49083	-1.62638	0.000677416	0.00037128
3250	-4.15518	-0.162051	-4.02766	3.4341e-08	3.32734e-09
3266	-2.65174	0.165337	-2.34935	0.000546579	0.000291908
3271	-4.12722	2.45196	-5.9642	3.59302e-09	2.20382e-10
3274	-3.7781	2.87344	-6.47435	3.4341e-08	3.32734e-09
3279	1.0651	-3.70027	4.82533	5.97221e-07	9.98203e-08
3280	-3.65171	-0.737271	-2.49523	1.02444e-05	3.16645e-06
3282	-2.22592	-3.44956	2.61702	0.00158085	0.000971368
3294	-0.760338	0.850288	-2.16716	0.000689655	0.000379499
3296	0.141804	-2.69811	2.40369	2.90059e-06	7.39602e-07
3301	0.357222	2.39907	-2.25717	2.53697e-05	8.87523e-06
3302	1.33128	3.0653	-1.70822	0.00417617	0.00296311
3344	-4.14305	-2.35837	-1.90105	0.000321417	0.000159336
3345	-0.643875	-4.2109	3.68398	1.5802e-09	7.44235e-11
3350	-2.3277	-4.48397	1.60413	1.87948e-05	6.25396e-06
3361	0.137502	2.71674	-2.33505	0.00337305	0.00231643
3365	-2.54917	0.553266	-3.83706	0.00276499	0.00184858
3370	0.835982	-4.53668	5.22145	3.99719e-07	6.32195e-08
3374	-0.925181	-4.08691	2.27567	0.00142188	0.000865277
3380	-3.29404	3.0943	-6.21999	3.33363e-14	3.21313e-16
3384	-4.06441	-1.33386	-1.79132	0.00609877	0.00453032
3388	-3.89984	-0.873895	-2.34092	0.000443066	0.000228958
3395	-3.97415	-1.23244	-2.18588	8.14991e-07	1.39432e-07
3407	-0.0784926	2.03935	-2.25021	0.000114421	4.95534e-05
3420	-2.43368	2.96636	-4.96647	1.63602e-05	5.38649e-06
3421	-4.37841	-2.49072	-2.24995	0.000677416	0.00037128
3422	1.47251	-1.23363	2.78871	0.00010758	4.53179e-05
3423	-3.27602	0.428672	-2.29145	7.90265e-09	5.3146e-10
3429	-2.489	-0.360104	-2.0949	0.00936658	0.00735169
3435	-4.11767	1.01006	-4.45921	3.71872e-06	9.87313e-07
3436	0.40188	2.74966	-2.59619	2.80159e-10	9.08291e-12
3455	-4.76609	-0.587822	-3.96175	4.4315e-11	1.09695e-12
3471	-1.65646	2.56408	-3.21294	0.000157953	7.06894e-05
3472	-2.82725	0.582756	-3.11778	7.0076e-10	3.00874e-11
3473	-3.6645	-0.586376	-3.09615	1.04667e-09	4.63149e-11
3476	0.537862	2.44007	-1.53358	0.00138435	0.000835766
3478	-3.72828	-1.50849	-2.68283	2.73104e-05	9.72166e-06
3479	0.293612	2.37275	-1.97307	0.00039448	0.000200707
3486	-3.62445	0.460107	-4.06904	2.90059e-06	7.39602e-07
3499	-2.19094	0.700294	-3.22146	2.54355e-05	8.93724e-06
3508	-4.12018	1.28241	-2.71216	0.00392317	0.00273806
3512	-3.71372	-0.664199	-2.07181	3.58553e-06	9.36806e-07
3524	-4.3971	-2.77854	-1.59074	1.6585e-08	1.20618e-09
3530	-0.0122075	2.1953	-1.92737	0.000513595	0.000268667
3537	0.775487	2.83283	-2.16101	2.90059e-06	6.59786e-07
3538	-3.65608	-0.939043	-2.7921	8.25789e-06	2.44571e-06
3543	0.868136	-1.86002	2.40008	0.000516724	0.000274945
3559	3.66239	0.842512	2.77349	0.000516724	0.000274392
3586	-3.93521	-2.01246	-1.81444	5.56667e-05	2.13765e-05
3588	0.270879	2.44419	-2.17331	0.00274316	0.00182978
3595	-0.502895	3.0559	-3.429	0.00111164	0.000656027
3596	-5.09859	-3.29156	-1.94148	5.67761e-05	2.21881e-05
3614	2.36725	-0.782018	3.1527	0.000873739	0.000495534
3617	-3.35406	-1.09471	-1.52096	0.00359176	0.0024863
3620	-0.0657332	2.15469	-1.90381	0.000280847	0.000136086
3626	-0.704563	2.76941	-2.32164	0.00753991	0.005761
3627	-0.0488086	2.15803	-2.07675	0.00732665	0.00555959
3629	-0.236361	-2.50605	1.95262	0.00031484	0.000154765
3643	2.54763	-0.998616	3.5004	1.28402e-09	5.87866e-11
3663	0.480378	2.93042	-2.38256	1.07081e-05	3.34026e-06
3670	-1.67232	1.2102	-2.83018	0.000173462	7.93783e-05
3671	1.82734	0.183101	2.42681	0.000689655	0.000379499
3672	1.37881	-2.71223	4.0257	2.61296e-07	3.21683e-08
3679	2.52615	-2.55696	3.59293	0.000862235	0.000483531
3680	0.63924	-2.80131	3.50988	3.22361e-07	4.98547e-08
3681	-3.04943	-4.30443	1.61972	2.33634e-05	8.00447e-06
3695	3.4375	1.58996	2.09123	0.000516724	0.000274392
3701	0.146108	-3.90693	3.71973	2.89022e-08	2.19061e-09
3709	-1.65993	-4.61522	3.12341	8.17722e-05	3.32821e-05
3711	-1.12348	2.94046	-3.38799	1.81546e-05	6.03693e-06
3712	-2.89516	2.1011	-3.67991	5.29682e-06	1.49564e-06
3714	0.52258	2.87475	-1.76226	0.00187271	0.0011827
3718	-2.45957	-4.29336	2.49787	0.000172601	7.8682e-05
3719	1.17469	-0.786916	1.60322	0.000158749	7.17414e-05
3721	-3.86678	-1.51767	-1.48966	0.00906483	0.00710492
3723	-3.24958	0.00217362	-3.04444	0.0017886	0.00112214
3737	-3.95637	-0.459871	-3.77586	3.4341e-08	3.32734e-09
3745	0.680464	2.83242	-1.99956	0.000873739	0.000495534
3749	2.88965	-4.44602	7.59841	3.4341e-08	3.32734e-09
3783	2.05235	-1.49284	3.01784	0.00417617	0.00296311
3786	-1.77903	2.87625	-3.56792	0.000873739	0.000495534
3788	0.496817	2.88181	-2.29467	0.00039448	0.000201172
3792	-1.67273	1.54289	-3.21562	5.29682e-06	1.49564e-06
3795	1.56354	-2.9843	2.36058	0.00431988	0.00308022
3801	-4.36787	-1.84463	-2.02102	0.000335286	0.000167312
3802	0.249017	2.47308	-2.22406	0.00732665	0.00555959
3807	3.53253	-0.164538	3.75688	5.90898e-07	9.54495e-08
3817	-3.21772	2.42134	-4.85142	8.34483e-05	3.43847e-05
3818	-4.57124	0.653834	-5.14436	2.90059e-06	7.39602e-07
3823	1.05663	3.31309	-2.38188	3.39436e-10	1.12577e-11
3831	-2.51766	-0.874933	-2.10568	0.00162113	0.000999669
3836	-3.71541	-1.00748	-2.1799	0.000196703	9.10478e-05
3841	-1.89307	-4.12956	2.25791	2.67628e-08	2.01674e-09
3848	0.109912	1.84734	-1.63663	0.000317109	0.00015713
3849	-0.0549372	-1.92225	2.17256	0.00111864	0.000660648
3854	-4.22319	-2.05797	-1.75091	4.33903e-06	1.16436e-06
3856	-3.70805	-1.63189	-2.16731	0.000360276	0.00018002
3858	2.97176	0.144698	2.96689	9.87791e-06	3.04452e-06
3860	2.9267	-1.00675	3.36779	0.00111164	0.000656027
3862	0.0367169	3.04369	-2.50178	0.00111164	0.000646216
3869	0.248209	2.71365	-2.54741	2.53686e-06	5.0237e-07
3889	-0.512443	2.2346	-3.11645	0.000414041	0.00021278
3901	0.557862	2.29149	-1.79633	0.00732665	0.00555959
3903	-4.0616	-0.933553	-3.05433	1.50681e-07	1.74612e-08
3910	0.230956	-2.04231	2.67577	1.25088e-05	3.94308e-06
3912	2.27955	-3.25942	4.50645	0.000915931	0.000523275
3914	-0.658552	1.98623	-2.936	0.00274316	0.00182978
3915	-0.94395	2.62409	-2.13617	0.000135377	5.97259e-05
3938	-4.33075	1.4899	-5.82065	3.69133e-05	1.35605e-05
3940	-4.32313	-2.60521	-1.76112	3.56092e-10	1.27277e-11
3949	-2.99264	2.4339	-3.89772	0.000873739	0.000495534
3970	-3.59109	-1.81994	-2.42595	0.000108273	4.56808e-05
3974	-1.28391	-4.19036	2.45779	7.65333e-05	3.0848e-05
3976	-0.217348	2.7711	-2.81845	0.000689655	0.000379499
3985	-4.08615	-1.70453	-2.28307	5.22523e-08	5.23096e-09
4021	-3.52695	-1.74862	-2.07725	0.000691362	0.000380741
4026	3.06918	-1.06756	4.33061	5.97221e-07	9.97093e-08
4027	3.38951	-3.47835	6.70253	3.59302e-09	2.20382e-10
4030	1.48189	-1.82174	3.15263	3.22361e-07	4.98547e-08
4031	-1.21989	-3.70242	2.81347	6.56964e-05	2.61778e-05
4033	0.542837	-3.54737	4.09374	2.90059e-06	7.39602e-07
4034	0.622766	-3.33023	3.23968	9.63277e-06	2.95841e-06
4035	3.57551	-3.36231	6.2421	3.56092e-10	1.45089e-11
4037	0.795824	2.59664	-2.56851	0.00187271	0.0011827
4042	-3.92283	1.97612	-5.80957	3.90914e-11	9.50526e-13
4056	-3.88802	-0.125964	-3.87337	2.50264e-07	3.06332e-08
4062	0.924274	-4.51859	5.66032	2.3407e-06	4.62501e-07
4063	-0.201829	-4.19747	2.88562	3.20083e-09	1.62671e-10
4064	-3.83985	-0.123463	-3.72836	2.50264e-07	3.06332e-08
4065	-1.64035	2.73446	-3.78802	3.38404e-08	2.57973e-09
4082	2.99418	-3.75445	5.82631	3.22361e-07	4.98547e-08
4087	3.49207	-0.956021	3.54578	2.14072e-06	4.17358e-07
4088	-3.87819	-0.945697	-2.58646	0.00291493	0.00195712
4095	-3.22323	-1.7192	-1.81463	0.00131916	0.000794384
4100	0.776598	-4.38047	5.26095	1.08738e-08	7.52709e-10
4104	-3.78736	-0.946347	-2.98271	5.12242e-09	3.27655e-10
4113	-3.20276	2.47218	-5.64786	2.90059e-06	7.39602e-07
4115	-2.54701	-4.63431	2.50652	0.000315273	0.000155115
4118	-3.77193	-1.03013	-2.55539	9.20987e-05	3.82114e-05
4120	-4.09425	-1.97972	-2.08825	1.64063e-08	1.18959e-09
4131	0.559947	-1.76694	1.88323	0.00158085	0.000971368
4135	-0.181212	-3.96013	3.02048	1.58863e-09	7.51684e-11
4153	-4.47921	-1.27663	-2.81769	3.22361e-07	4.98547e-08
4154	-4.44053	-2.02425	-2.10107	6.96499e-09	4.62298e-10
4156	-3.77523	1.34119	-4.58214	3.22361e-07	4.98547e-08
4158	-4.34814	2.60213	-6.9399	2.90059e-06	7.39602e-07
4161	0.253676	-2.24702	2.2976	2.57396e-05	9.10047e-06
4166	0.727476	2.41225	-1.67035	0.00477917	0.00342551
4169	-4.64678	-2.64072	-2.01807	0.00148004	0.000904561
4172	0.585299	2.44386	-1.89104	0.0041255	0.00291403
4181	-2.90227	-0.764274	-2.21714	0.00022959	0.000109338
4191	-3.68951	2.52947	-5.68412	0.00274316	0.00182978
4197	1.0764	2.59455	-1.51815	0.00871563	0.00674339
4202	-1.49285	1.26947	-3.01198	0.00111164	0.000656027
4207	-0.221343	-2.75949	2.25976	0.000361154	0.000180695
4209	-2.09577	2.0141	-3.81251	5.29682e-06	1.4792e-06
4212	-0.166823	2.65612	-2.72475	0.000216927	0.000101454
4216	-2.92359	-4.68012	1.75653	0.00567119	0.00416177
4217	-4.71442	-2.99809	-1.72886	4.38477e-09	2.75669e-10
4218	-3.36223	2.07559	-3.60648	8.2825e-05	3.40009e-05
4230	0.64892	2.57922	-1.76287	0.000377341	0.000190034
4234	0.678241	2.72707	-1.7967	0.00580211	0.00426675
4236	-3.07851	-3.88434	1.42322	0.00359176	0.0024863
4239	-1.46419	-4.08064	3.41148	1.80382e-07	2.13771e-08
4240	-0.174814	-3.45777	3.03723	1.07081e-05	3.34026e-06
4245	-3.70341	1.32256	-4.53728	1.22318e-06	2.22932e-07
4257	-3.63259	-1.09903	-2.08215	0.00262793	0.00172931
4272	-1.27431	0.590563	-2.34411	0.000836214	0.000468756
4274	0.314235	2.42375	-3.06291	2.53697e-05	8.87523e-06
4275	0.382537	2.8868	-2.42495	4.89561e-05	1.85958e-05
4288	-3.82346	-0.981909	-2.31444	0.0082277	0.00631722
4294	-4.6568	-2.73297	-2.08579	0.00337305	0.00231643
4298	-4.23721	-1.90212	-2.53375	1.02444e-05	3.16645e-06
4312	0.934654	3.60266	-2.24195	0.00262793	0.00172931
4316	0.31053	2.72429	-2.46256	5.89921e-06	1.69029e-06
4317	1.19823	2.52928	-1.53465	0.00039448	0.000201172
4320	-0.609941	2.18723	-2.22262	0.00337305	0.00231643
4324	0.269887	2.77001	-3.02153	0.00158085	0.000971368
4326	1.04533	2.9626	-1.96957	0.00732665	0.00555959
4328	-2.20741	0.381491	-2.63544	0.000270833	0.000130819
4331	-4.09203	-0.573955	-3.15351	0.00111955	0.000662413
4333	0.385074	2.2954	-1.91033	0.000516724	0.000274392
4335	0.196325	3.19534	-2.30359	5.89921e-06	1.69029e-06
4337	0.147714	3.13178	-2.71538	0.000516724	0.000274392
4338	-1.56366	1.48659	-2.37774	0.00567119	0.00416177
4343	1.27627	3.14304	-1.81884	0.00131916	0.000794384
4357	-1.08732	2.58227	-2.8801	0.000171757	7.8222e-05
4359	2.7754	-0.482284	3.20532	1.10357e-05	3.45213e-06
4360	-0.541354	2.54134	-3.76811	1.58405e-05	5.17722e-06
4362	-0.1174	1.80729	-2.23228	0.000217069	0.000102805
4365	-4.5101	3.19904	-7.0852	3.22361e-07	4.98547e-08
4366	-3.28494	0.261809	-2.89205	0.00276499	0.00184858
4368	2.1058	3.07886	-1.65142	0.00688556	0.00517662
4371	0.418725	2.9461	-1.67225	0.00262793	0.00172931
4373	1.51215	3.1186	-1.65494	2.90059e-06	7.39602e-07
4389	-0.89543	2.80296	-3.06095	0.000217069	0.000102805
4392	0.350823	2.1091	-3.17869	2.53697e-05	8.87523e-06
4398	2.48453	-0.313289	1.78694	0.00871757	0.00681174
4408	-0.33029	1.686	-2.1258	0.005382	0.00392361
4414	-4.45204	-2.10498	-2.34706	5.67761e-05	2.21881e-05
4449	-3.80387	-1.90854	-2.01411	7.38056e-05	2.97324e-05
4454	-4.16767	-1.66339	-2.40894	5.56667e-05	2.13765e-05
4476	-0.660524	-2.72711	2.08237	0.000154581	6.88419e-05
4479	0.318743	-2.53993	3.0822	0.00871757	0.00676255
4480	-3.87233	-0.537015	-4.08021	1.5802e-09	7.44235e-11
4491	-1.5841	0.306097	-1.8902	3.1006e-05	1.11119e-05
4495	-3.35423	1.77747	-4.69193	3.4341e-08	3.32734e-09
4506	1.32424	2.75708	-2.0045	0.00171313	0.00105978
4510	1.81564	-0.346929	1.60156	0.000969425	0.000557234
4521	-2.98089	-0.67236	-2.35585	0.000171757	7.8222e-05
4536	2.43662	-1.10568	2.45905	0.000900417	0.000511256
4546	-4.26782	1.38435	-5.44958	3.90914e-11	9.50526e-13
4547	-4.39952	-2.9207	-1.42984	9.7114e-07	1.68912e-07
4551	-1.74105	2.37797	-3.13882	1.58405e-05	5.17722e-06
4559	-0.35415	-3.99753	2.99726	0.000114421	4.95534e-05
4560	1.80385	3.21773	-1.5187	0.00871757	0.00681174
4577	1.58816	3.34623	-1.516	0.00337305	0.00231643
4589	-3.79176	0.0429433	-2.86545	3.0001e-06	7.69575e-07
4591	-0.0368675	2.35858	-2.26955	0.000216927	0.00010136
4596	1.21228	-1.57074	2.78837	0.0041255	0.00291403
4598	0.394476	-2.47046	2.37826	8.02801e-06	2.37059e-06
4602	-0.74417	-2.9067	2.21246	0.00759089	0.0058183
4606	0.0551836	-3.11046	2.02997	0.00417617	0.00296311
4609	0.573185	-3.20694	2.99622	6.94962e-06	2.01562e-06
4640	-2.40296	1.3457	-3.68923	1.13525e-06	2.04668e-07
4652	-4.55305	-0.807599	-3.59999	3.22361e-07	4.98547e-08
4682	3.43203	-2.62999	5.7912	1.13799e-18	1.24643e-21
4700	3.75308	-0.153669	4.49754	3.22361e-07	4.98547e-08
4707	-1.79988	-4.53656	2.63246	3.69133e-05	1.35605e-05
4709	-3.33324	2.48602	-6.15296	2.41249e-15	1.69112e-17
4715	-3.81065	-1.81448	-1.86131	4.59196e-06	1.24129e-06
4729	1.77865	-3.68656	6.08758	2.90059e-06	7.39602e-07
4731	2.92006	-2.66147	3.34302	6.94962e-06	2.01562e-06
4738	3.1917	-4.56359	7.33627	9.68277e-10	4.24218e-11
4742	-3.43487	1.75832	-4.27858	2.90059e-06	7.39602e-07
4743	0.252255	2.61517	-2.24484	5.97221e-07	9.97093e-08
4750	-0.590746	-2.96312	2.09992	0.0085771	0.00660615
4754	0.487731	-3.03049	3.45925	0.00158085	0.000971368
4758	-0.337547	-4.34997	3.54439	2.03831e-05	6.9298e-06
4775	1.51139	-1.52164	2.24025	0.00232963	0.00151107
4781	-4.12958	-2.49533	-1.51773	0.00221829	0.00143261
4790	-3.10421	-1.24343	-2.29472	0.000361154	0.000180695
4792	3.36646	-0.250388	3.45788	3.26152e-05	1.17886e-05
4798	-0.778342	1.58497	-2.86342	8.17722e-05	3.32821e-05
4808	2.30821	3.40589	-1.62622	0.00289701	0.00194382
4809	0.871969	3.65553	-2.75136	0.00195848	0.00123816
4817	-4.37141	-1.45588	-2.45024	0.00501092	0.00363662
4820	-3.97814	-1.34806	-1.86839	0.00557664	0.0040704
4825	-3.77352	-0.398653	-2.95298	0.00534188	0.00388501
4843	0.111485	2.33509	-2.08196	2.90059e-06	6.17847e-07
4846	2.56458	-1.05487	2.37918	0.00997436	0.00786587
4847	0.364679	-4.39423	5.95798	3.59302e-09	2.20382e-10
4850	0.789814	-1.03689	2.06806	0.00607731	0.00451305
4863	-1.78781	1.85489	-3.6582	3.22361e-07	4.98547e-08
4869	-3.9302	-1.31299	-1.69926	3.27793e-05	1.18623e-05
4882	1.37889	2.563	-1.4013	0.00732665	0.00555959
4888	-0.331194	1.39443	-1.74778	0.0017886	0.00112214
4912	-1.91841	-4.66402	1.80906	0.00148004	0.000904561
4913	0.151997	1.91068	-1.75868	0.00195848	0.00123816
4918	-4.60044	-2.74542	-1.77278	0.00373027	0.0025928
4920	-2.05689	0.21756	-2.18072	1.62101e-05	5.32999e-06
4923	-1.2208	-3.66474	2.40605	0.000177432	8.13506e-05
4926	-3.07112	1.44534	-4.51646	2.90059e-06	7.39602e-07
4927	3.74559	1.57173	1.78166	0.00871757	0.00681174
4936	0.359567	2.86223	-2.87629	0.000977939	0.000562341
4940	-2.67445	2.4586	-4.83628	3.4341e-08	3.32734e-09
4943	-3.61778	-1.52108	-2.38457	1.50892e-07	1.75848e-08
4957	-2.91111	0.510211	-2.99104	0.000114421	4.95534e-05
4965	-4.17526	-0.0352346	-4.23267	0.00759089	0.0058183
4973	-4.1107	-1.52181	-3.0763	3.69133e-05	1.35605e-05
4981	-1.40738	2.69478	-3.37589	0.00417617	0.00296311
4982	-0.206105	2.76781	-2.77028	1.82069e-06	3.48983e-07
4983	-1.2084	2.63066	-3.49727	0.00274316	0.00182978
4984	-0.413463	2.93068	-3.1201	9.63277e-06	2.95841e-06
4985	-0.324158	-2.66163	3.15495	0.00906483	0.00710492
4987	3.85282	0.962877	3.27159	1.23993e-08	8.8153e-10
4989	-1.33669	2.67259	-4.15552	1.80382e-07	2.13771e-08
4991	1.73833	-1.07463	2.54319	0.00567119	0.00416177
4992	2.78599	-2.63345	5.18271	3.22361e-07	4.29746e-08
4993	2.77356	-4.25044	6.80701	1.23993e-08	8.8153e-10
5000	-3.93208	-1.98282	-2.54237	0.00308513	0.00208559
5002	2.902	-2.18581	5.0809	2.90059e-06	7.39602e-07
5005	-0.125087	-2.28088	2.24978	1.50892e-07	1.75848e-08
5022	-0.772274	-3.04763	1.96977	8.26149e-05	3.36432e-05
5025	-0.348018	2.64006	-2.38495	0.00128847	0.000769977
5026	-4.07969	0.196767	-4.39287	2.90059e-06	7.39602e-07
5033	0.110761	-4.56084	3.78585	4.36211e-10	1.806e-11
5034	0.762475	-2.79369	2.72946	3.1509e-05	1.12991e-05
5035	-4.40201	-3.18719	-1.41205	0.000711265	0.00039326
5043	-2.2989	-0.455944	-1.42588	0.00291493	0.00195712
5046	-3.77704	0.331933	-3.87676	2.90059e-06	7.39602e-07
5047	3.07476	-0.28071	3.05077	1.52657e-05	4.9091e-06
5055	0.146983	2.52864	-2.44839	0.00732665	0.00555959
5056	-4.10463	-2.64953	-1.49588	0.00373027	0.0025928
5065	0.274491	2.66251	-1.78944	1.06598e-06	1.85876e-07
5072	-3.12682	0.856336	-1.85272	0.00739905	0.00561777
5083	0.0191432	-4.75763	4.33334	2.77597e-14	2.61483e-16
5084	0.239288	-4.06733	4.6633	2.90059e-06	7.39602e-07
5085	-0.702637	-3.29189	2.58925	0.00488508	0.00351854
5086	-1.16168	2.90132	-4.063	9.18934e-08	9.91721e-09
5089	-0.915596	-3.35843	3.33741	0.00042097	0.000216525
5094	-4.9554	-3.65077	-1.65174	0.000273168	0.000132246
5103	-4.6588	-3.08749	-1.42727	0.00221829	0.00143261
5108	-4.46625	-2.34454	-2.20156	7.15392e-06	2.07957e-06
5109	-4.394	-1.80986	-2.14184	4.84174e-05	1.83063e-05
5110	-1.5079	2.92227	-3.8529	0.00607731	0.00451305
5113	-3.6421	-1.73477	-2.14597	0.000270833	0.000130819
5121	-0.911998	-4.05307	1.47998	0.00158581	0.00097476
5122	-1.08113	-3.84089	3.0144	8.17722e-05	3.32821e-05
5124	3.44819	-1.03358	4.44185	3.59302e-09	2.20382e-10
5127	-4.38612	-2.21084	-2.14777	0.00243264	0.00158055
5130	1.62916	-0.901329	1.89046	0.00174138	0.00107878
5139	-1.50802	0.235655	-1.99681	0.000132635	5.78771e-05
5141	-0.0225903	-2.57088	2.50004	1.1768e-05	3.68895e-06
5142	-4.12025	-2.17815	-1.93021	3.4341e-08	3.32734e-09
5144	3.31822	-2.24375	5.42226	2.90059e-06	7.39602e-07
5149	-1.37809	-3.48926	2.37084	7.38056e-05	2.95762e-05
5150	1.18742	-3.523	5.4114	2.90059e-06	7.39602e-07
5151	3.0846	-3.13602	5.9845	3.56092e-10	1.45089e-11
5152	2.15689	-2.98844	4.49989	3.56092e-10	1.45089e-11
5153	-3.27631	-0.90365	-1.96347	0.00688556	0.00517662
5156	-3.40553	1.74779	-4.60534	5.67761e-05	2.21881e-05
5184	-0.360647	-3.93816	3.46939	0.00148004	0.000904561
5199	3.50648	-2.67461	5.3592	3.22361e-07	4.98547e-08
5201	0.203738	-3.23774	3.0037	2.3407e-06	4.62501e-07
5202	1.22359	-2.48966	3.61352	3.4341e-08	3.32734e-09
5203	0.723101	-3.91462	3.67565	2.90059e-06	6.48832e-07
5204	0.939776	-2.27272	3.43221	3.14804e-07	3.99281e-08
5211	0.663974	-2.60605	3.51315	4.20216e-10	1.73057e-11
5212	0.421198	-3.19624	3.92411	2.90059e-06	7.39602e-07
5215	1.08858	-3.38555	3.32739	0.00203357	0.00129097
5220	0.732635	2.92113	-1.95346	0.000135377	5.97259e-05
5225	-0.742514	-2.99412	2.22287	0.00141186	0.000857939
5226	-0.623634	-1.91124	1.93873	0.000171757	7.8222e-05
5229	0.334861	-3.98132	3.53138	0.00359176	0.0024863
5230	-1.49781	-4.01506	2.5836	0.000521154	0.000277621
5232	2.01316	-2.99963	5.20241	3.90914e-11	9.50526e-13
5234	0.302523	-3.9294	3.96228	1.50895e-05	4.8359e-06
5235	0.875683	-3.72499	4.24708	2.90059e-06	7.39602e-07
5236	1.69572	-2.33602	4.27923	5.14414e-09	3.31298e-10
5238	0.869688	-4.76716	5.72472	6.75536e-17	2.81165e-19
5240	-0.349175	-1.67563	1.64379	5.67761e-05	2.21881e-05
5242	2.16166	-2.96311	4.69414	3.4341e-08	3.32734e-09
5243	0.450793	-3.40711	3.86631	6.94264e-11	1.90105e-12
5244	1.03588	-2.63019	3.63666	2.57902e-18	4.51965e-21
5246	-0.70012	-3.56129	2.88712	3.14804e-07	3.99281e-08
5247	-0.189316	-3.73144	3.66619	6.46282e-08	6.61147e-09
5248	0.181319	-4.25374	4.20626	2.90059e-06	7.39602e-07
5249	0.581626	-3.87259	4.33323	3.22361e-07	4.98547e-08
5251	1.21745	-3.7942	4.00034	1.51199e-06	2.81862e-07
5263	2.08509	3.45626	-1.41616	0.00039448	0.000201172
5272	2.74124	-3.05725	6.01923	0.00111164	0.000646216
5273	0.276724	-2.20671	1.95878	1.71921e-06	3.22752e-07
5274	-2.4368	2.56148	-4.80307	2.90059e-06	5.98256e-07
5283	1.77853	-1.23446	3.15909	1.15345e-05	3.61321e-06
5293	-3.93071	-0.32056	-3.59028	1.4345e-06	2.64352e-07
5299	-4.11187	-2.63353	-1.62462	0.000144727	6.41681e-05
5305	2.14824	-4.63713	5.15162	6.08559e-07	1.01849e-07
5308	-0.464963	2.54023	-2.28455	2.57396e-05	9.10047e-06
5313	0.142808	-3.48348	3.32213	8.2825e-05	3.40009e-05
5322	2.76596	-0.479135	1.80443	6.58616e-06	1.89145e-06
5324	1.11252	-4.28812	5.52097	3.22361e-07	4.611e-08
5325	1.40557	-3.31536	4.77286	6.90541e-12	1.2404e-13
5326	-0.330361	-1.7398	2.55271	0.00753991	0.00576106
5327	2.31888	-2.86365	5.10952	7.13664e-16	4.36533e-18
5329	-2.92086	0.332071	-2.17223	0.00274316	0.00182978
5336	-3.55683	-2.41215	-1.41168	0.000259197	0.000124006
5337	0.593037	2.06618	-1.50472	0.0041255	0.00291403
5344	-4.20047	-1.47226	-2.6542	3.31165e-09	1.73631e-10
5345	-4.23637	-2.8399	-1.66074	1.22346e-07	1.39632e-08
5346	2.63243	-0.691948	3.19221	0.00141186	0.000857939
5348	-3.88961	1.54423	-4.40838	3.59302e-09	2.20382e-10
5352	-3.18502	0.750454	-5.23703	0.00373027	0.0025928
5370	-3.44743	-0.866255	-1.92918	0.000260418	0.000124818
5373	0.364409	-4.81262	5.16122	6.90541e-11	1.8606e-12
5383	2.57158	-0.412227	3.23044	0.00221829	0.00143261
5386	-2.07775	1.02425	-2.54944	0.00152562	0.000933418
5421	1.354	-3.66086	4.69262	3.22361e-07	4.98547e-08
5424	-0.690029	2.34323	-2.84787	0.000171757	7.8222e-05
5427	-4.19368	-0.396172	-1.67578	0.00375113	0.00260976
5429	-3.6181	-1.71209	-1.88004	0.00307622	0.00207754
5430	-3.79647	1.50372	-4.90925	3.31165e-09	1.74107e-10
5457	-4.25409	-2.84796	-1.63729	1.79597e-07	2.11268e-08
5468	-1.3883	0.110525	-2.11738	0.000377341	0.000189424
5471	2.14269	-0.808999	3.16467	0.000294443	0.000144222
5472	-3.57469	-0.800345	-1.74264	0.00347424	0.00239353
5474	2.7412	-0.519235	2.50629	4.3918e-06	1.17948e-06
5484	-1.68921	-4.14181	2.21942	0.00567119	0.00416177
5487	1.16161	-1.28416	2.43324	4.89561e-05	1.85958e-05
5490	-1.77534	-3.68633	1.71091	0.000171092	7.73944e-05
5493	0.866939	-3.02629	2.45443	0.00160163	0.000986239
5495	-3.80355	-2.34503	-1.88826	0.000611015	0.000328532
5497	-4.04596	2.25488	-6.63422	1.3649e-09	6.36852e-11
5502	-2.20637	2.61817	-4.64513	3.71634e-06	9.83425e-07
5503	1.21923	3.28912	-2.28885	0.00274316	0.00182978
5505	-3.55748	0.0768037	-2.034	0.00753991	0.005761
5514	2.46382	-3.45928	4.72816	3.4341e-08	2.70284e-09
5522	-4.34872	-1.16573	-3.1159	9.63277e-06	2.95841e-06
5524	-2.12709	1.36256	-3.48965	0.000756831	0.000421272
5525	-1.14959	2.24657	-3.09069	5.89921e-06	1.69029e-06
5545	-3.70317	-0.140431	-3.45798	5.29682e-06	1.4792e-06
5546	-2.87601	1.58366	-3.91093	2.90059e-06	7.39602e-07
5552	0.164796	2.56515	-1.91121	3.16063e-05	1.13591e-05
5554	-0.532612	2.56723	-2.34522	4.70094e-05	1.77284e-05
5562	0.115785	2.78315	-2.80258	0.00417617	0.00296311
5566	1.92146	-2.16223	4.38853	2.90059e-06	7.39602e-07
5572	-1.72561	1.51916	-3.19485	2.90059e-06	7.39602e-07
5578	-4.25076	-1.86322	-1.94089	0.000611015	0.000328998
5579	1.76458	2.75686	-1.70601	5.67761e-05	2.21881e-05
5582	-4.43527	-2.24208	-2.22843	3.22361e-07	4.98547e-08
5587	-1.49859	-3.62117	2.03866	1.06737e-05	3.30383e-06
5593	-3.84542	0.352367	-3.72575	2.90059e-06	7.39602e-07
5597	-1.41452	2.64305	-4.36752	3.59302e-09	2.20382e-10
5603	1.68655	-1.44509	3.01259	0.00039448	0.000200623
5613	0.762709	3.43517	-2.49111	0.00906483	0.00710492
5619	-2.41519	2.02233	-4.76538	2.90059e-06	7.39602e-07
5622	-0.984446	2.676	-3.15466	0.000756831	0.000421272
5623	-2.85218	2.06068	-5.28466	2.53697e-05	8.87523e-06
5625	0.387302	2.99584	-2.43042	0.00997436	0.00786587
5628	-3.48825	1.43705	-4.58574	2.90059e-06	7.39602e-07
5632	-0.628652	2.23861	-2.36482	0.000114421	4.95534e-05
5634	-0.000519633	2.09951	-2.29867	0.000516724	0.000274392
5644	-3.34273	-1.09704	-2.15758	5.67761e-05	2.21881e-05
5651	-3.84604	1.34229	-4.52352	1.58405e-05	5.17722e-06
5653	-4.61909	-2.8807	-1.66791	0.000135377	5.93399e-05
5658	2.9046	-1.96632	4.22501	0.000833279	0.000466563
5681	-3.87609	2.00163	-5.69857	4.63884e-11	1.17876e-12
5682	0.448838	2.75345	-2.17426	0.00719146	0.0054129
5685	-3.88771	-1.23609	-2.1681	5.56667e-05	2.13765e-05
5687	-3.09284	1.3358	-3.71212	0.00039448	0.000201172
5700	-0.427606	1.45662	-2.35158	0.00142188	0.000865277
5703	-2.24399	-0.181471	-2.00663	0.00221829	0.00143261
5706	-3.34549	-0.309962	-3.37016	9.63277e-06	2.95841e-06
5708	-0.774668	-3.09124	2.28095	0.000249288	0.00011921
5710	0.416906	3.08487	-1.89856	0.00307622	0.00207754
5712	1.68615	2.98704	-1.48695	0.00200974	0.00127452
5713	2.05936	3.42435	-1.51743	0.00871348	0.00671501
5714	0.291057	3.12318	-3.14942	9.20987e-05	3.82114e-05
5715	1.27615	3.11453	-1.70466	0.00607731	0.00451305
5720	-0.393677	2.31724	-2.53007	4.9055e-05	1.86764e-05
5721	-1.09797	2.32325	-4.01061	4.21962e-08	4.18727e-09
5723	-1.45456	2.39365	-3.13476	0.000158749	7.17414e-05
5724	-0.194115	2.47337	-2.66232	7.63713e-06	2.24346e-06
5728	-0.246563	2.8177	-3.1452	2.53697e-05	8.87523e-06
5730	0.668222	2.79718	-2.12896	0.00010758	4.53179e-05
5739	0.264473	2.40288	-2.09722	7.89252e-07	1.34856e-07
5742	-2.44566	2.07962	-3.36718	5.29682e-06	1.4792e-06
5744	-0.0155696	2.39099	-1.92772	0.00373027	0.0025928
5746	-0.375336	1.4929	-1.92109	0.00039448	0.000201172
5750	-2.7352	0.738372	-2.85393	3.67434e-05	1.33451e-05
5751	-0.665326	1.02394	-2.16318	0.00871563	0.00674339
5752	1.66407	2.89788	-1.78401	0.00221606	0.00141168
5754	0.329485	2.48687	-2.28792	0.00131916	0.000794384
5755	-1.04876	1.80104	-2.91406	0.00111164	0.000656027
5758	-0.899684	-4.62044	3.82763	0.000260418	0.000124818
5763	-1.00242	2.29068	-4.0054	0.000516724	0.000274392
5765	0.295812	-3.58473	4.03835	0.00141186	0.000857939
5766	-3.62266	3.13625	-6.67427	3.4341e-08	3.32734e-09
5769	0.604633	3.0771	-2.26294	0.000443066	0.000228958
5771	-1.42242	-3.78158	1.9467	7.09907e-09	4.74308e-10
5772	-0.328741	-2.35978	1.67322	0.00266159	0.00175262
5774	-3.56986	2.37251	-6.71112	0.000677416	0.00037128
5777	-3.11949	0.805416	-3.62351	0.00039448	0.000201172
5781	-0.620864	3.47353	-3.91818	0.000516724	0.000274392
5782	-0.489964	3.0727	-3.49102	2.90059e-06	7.39602e-07
5783	-3.09485	-0.884005	-2.6447	0.00177904	0.00111458
5784	-2.16078	2.22203	-3.00877	0.00274316	0.00182978
5785	1.44978	3.32434	-2.36314	5.29682e-06	1.4792e-06
5788	1.03276	-2.62425	3.95599	1.66338e-06	3.11178e-07
5794	0.75082	3.17581	-1.77782	0.00111164	0.000646216
5798	-1.08618	1.53721	-2.10527	0.00488508	0.00351854
5800	-2.59635	2.70986	-5.61279	3.4341e-08	3.32734e-09
5803	-4.32921	1.00504	-5.00071	4.20328e-06	1.12609e-06
5812	0.191925	3.2134	-2.22428	5.17512e-05	1.98276e-05
5819	4.02978	-5.15203	9.23689	3.90914e-11	9.50526e-13
5826	-1.50512	-4.69092	2.94153	2.3563e-10	7.48442e-12
5828	-0.14972	2.47164	-2.12447	0.00871757	0.00681174
5829	-2.31008	2.92485	-4.78026	2.90059e-06	7.39602e-07
5841	-1.54329	-4.25531	3.05909	1.78304e-08	1.30457e-09
5842	0.801381	-3.33431	4.23979	0.00501092	0.00363662
5848	-1.90425	2.83027	-4.68486	3.4341e-08	3.32734e-09
5851	1.72095	-1.5488	2.27165	0.00337305	0.00231643
5855	0.28399	2.82103	-1.63836	0.00276499	0.00184858
5857	0.802831	-4.66942	5.46946	1.4345e-06	2.67103e-07
5870	-0.812309	2.53788	-2.70073	0.000114421	4.95534e-05
5872	0.743185	2.66301	-1.56571	0.00419346	0.00298365
5881	-1.20918	0.300687	-2.80111	3.77572e-05	1.40524e-05
5883	-3.97662	-0.253509	-2.84673	0.000873739	0.000495534
5884	-4.50365	-2.06236	-2.63506	3.58553e-06	9.47239e-07
5887	-4.37209	-1.37567	-3.21016	1.58617e-08	1.14315e-09
5889	0.878349	2.55506	-1.79582	0.00871757	0.00681174
5893	-3.75787	2.61507	-6.71721	3.22361e-07	4.98547e-08
5911	0.622172	-4.23147	4.5225	5.7033e-07	9.18274e-08
5912	1.08387	-3.60864	1.82267	0.00203357	0.00129097
5914	0.142556	-2.67528	3.07287	2.53943e-06	5.03436e-07
5915	2.34138	-3.31268	4.23528	6.46282e-08	6.61147e-09
5916	0.584338	-4.45135	4.70819	3.47931e-16	1.82921e-18
5918	-1.03796	-3.54116	2.47328	9.63277e-06	2.95841e-06
5919	1.98173	-3.81068	4.52357	1.50895e-05	4.8359e-06
5929	-1.56138	1.11682	-3.12792	0.001127	0.000667562
5930	-0.568055	2.81327	-3.65612	0.000516724	0.000274392
5931	-1.50334	-5.27741	3.77406	0.00187271	0.0011827
5934	1.31354	-3.09675	4.23959	1.78589e-06	3.36834e-07
5942	-2.38597	1.45989	-4.23799	6.61469e-07	1.11428e-07
5943	-3.9976	-1.83213	-1.84035	0.000269256	0.000129181
5945	1.31403	-2.30574	2.55632	0.000206664	9.58851e-05
5949	1.09809	2.56342	-1.56273	0.00337305	0.00231643
5952	-4.07271	2.87887	-6.79717	3.22361e-07	4.98547e-08
5959	-4.07787	-2.2447	-1.87725	0.00183955	0.00115531
5964	0.439868	-4.10696	4.32434	7.13664e-16	4.37735e-18
5976	-3.93809	-1.9988	-1.46051	0.00280333	0.00187728
5977	-3.84389	0.596323	-4.79437	0.00688556	0.00517662
5979	-3.58261	-1.17372	-2.5595	0.00257859	0.00168837
5988	1.5524	-0.644848	1.90407	0.000711265	0.00039326
5991	-4.34919	-2.52099	-1.50073	0.000103723	4.32389e-05
6002	0.47935	-1.95409	2.42847	3.22361e-07	4.98547e-08
6004	-2.18646	-4.45309	2.26663	2.90059e-06	6.45141e-07
6005	1.88769	-2.90983	4.79244	3.22361e-07	4.98547e-08
6006	0.436423	-3.25522	3.39207	1.58405e-05	5.17722e-06
6007	2.1825	-2.07104	3.57977	3.99719e-07	6.32195e-08
6010	1.75016	-3.72036	5.20757	5.89921e-06	1.69029e-06
6015	-0.470346	2.385	-2.85227	2.90059e-06	7.39602e-07
6020	-2.88722	-4.29335	2.15822	0.00540071	0.00393962
6022	0.49264	-3.33109	3.7677	5.81861e-06	1.65445e-06
6025	-3.36655	-0.457704	-2.84981	2.90059e-06	7.39602e-07
6027	-0.0176536	-3.97554	3.87526	2.13902e-10	6.65368e-12
6029	-3.2427	-1.38829	-1.94796	0.000294443	0.000144222
6034	-0.126741	-3.47189	1.92888	0.00871757	0.00681174
6048	-2.88886	-0.686515	-1.90856	0.000689655	0.000379499
6058	-3.1981	2.61855	-3.56803	0.000443066	0.000228958
6064	0.269551	-4.24231	4.07471	4.29571e-09	2.66306e-10
6078	-3.79482	-0.895514	-2.7159	2.3407e-06	4.62501e-07
6087	3.62938	-2.83068	6.46006	3.22361e-07	4.98547e-08
6093	-3.77224	-4.97088	1.45659	2.41535e-06	4.7778e-07
6099	3.2626	-2.59209	4.73666	5.97221e-07	9.97093e-08
6100	3.86344	-1.99418	5.87496	3.59302e-09	2.20382e-10
6113	-2.92381	-4.00476	1.52538	0.0029737	0.00199788
6125	-1.42278	-4.07196	2.49951	9.57427e-06	2.86704e-06
6126	2.05181	-2.22542	3.77325	0.00474472	0.00339354
6132	0.305246	-4.33718	3.98217	0.000103723	4.32389e-05
6135	-4.60116	-3.33003	-1.74311	8.17722e-05	3.32821e-05
6148	0.317741	1.97299	-2.29782	0.00501092	0.00363662
6157	-3.62493	0.36259	-3.76406	8.47943e-06	2.51875e-06
6167	-3.39123	-0.0660282	-3.05875	1.86801e-09	8.87967e-11
6177	-0.293921	-3.20783	1.93786	8.50475e-05	3.50623e-05
6181	0.838954	3.38534	-2.14572	6.36992e-05	2.53262e-05
6182	0.537052	-4.37385	3.61195	8.4417e-06	2.502e-06
6192	0.762715	-2.71406	3.4428	9.41475e-07	1.62759e-07
6201	-4.29785	-1.69532	-1.8853	0.00298899	0.00201274
6207	-3.1251	0.382333	-3.87881	1.4345e-06	2.66669e-07
6210	1.31899	3.08867	-2.06719	8.74378e-07	1.50742e-07
6213	0.917138	-4.43616	5.49047	3.06838e-13	4.03292e-15
6214	0.313034	-4.49459	4.71381	2.90059e-06	7.39602e-07
6215	-0.488547	-2.76567	1.70825	2.55828e-05	9.01141e-06
6217	-2.89673	-4.60776	1.77683	3.24363e-09	1.65557e-10
6218	-0.838878	2.81199	-3.95095	4.59196e-06	1.2411e-06
6219	-0.535553	-3.9987	2.61387	7.38056e-05	2.96865e-05
6228	-0.882157	2.04286	-2.80764	2.53697e-05	8.87523e-06
6237	-3.0431	-1.5404	-1.73933	0.00537643	0.00391249
6269	0.870826	-2.72632	3.4524	3.4341e-08	3.32734e-09
6270	2.96608	-3.35768	5.13722	2.04243e-09	1.01562e-10
6272	-0.614418	-3.27338	2.74534	0.000516724	0.000274392
6274	0.119241	3.05453	-3.27406	2.90059e-06	7.39602e-07
6277	3.20273	-2.14615	3.75715	0.000114421	4.95534e-05
6281	0.356902	-2.41079	2.81975	3.22361e-07	4.5598e-08
6287	1.82188	-3.78394	5.84568	4.21962e-08	4.18727e-09
6289	2.52482	-1.32681	3.12326	9.87329e-05	4.1072e-05
6298	0.550409	2.86361	-1.86606	2.03831e-05	6.9298e-06
6304	-3.76735	0.200606	-3.63492	6.46282e-08	6.57181e-09
6310	-0.881252	1.70496	-1.73617	0.00655174	0.00490555
6350	1.45024	-3.09496	4.08556	1.50895e-05	4.8359e-06
6355	3.56493	-0.164774	3.51236	1.06173e-05	3.28403e-06
6356	3.60734	-0.0445419	3.98926	3.4341e-08	3.32734e-09
6361	1.72429	-2.77956	3.86546	0.00256258	0.00167676
6372	3.00918	-0.0951472	3.01343	0.000317109	0.00015713
6373	-4.1099	-2.08068	-2.02922	0.00221829	0.00143302
6374	2.6181	-1.65203	2.75763	0.000101472	4.22558e-05
6378	-4.14515	-1.17108	-3.20484	2.53697e-05	8.87523e-06
6386	0.638481	2.36442	-2.44048	5.56667e-05	2.13765e-05
6388	-0.618142	2.70595	-3.17478	1.11153e-06	1.96306e-07
6390	1.78746	-1.72264	4.03349	0.000114421	4.89183e-05
6391	0.218486	-1.28532	1.49163	0.000472118	0.000244695
6392	2.14262	-1.50205	3.84754	5.00857e-06	1.36707e-06
6393	3.78274	1.91537	1.86737	0.000493277	0.000256201
6395	0.361171	3.53519	-3.30267	1.03104e-10	2.89098e-12
6396	-4.1988	-2.52291	-2.06069	6.56964e-05	2.61778e-05
6397	-3.99208	2.82766	-6.59553	3.59302e-09	2.20382e-10
6398	-3.45383	-1.80153	-1.47758	0.00250838	0.0016358
6404	-0.0213066	2.07424	-2.12197	0.00490324	0.00353377
6407	-4.67654	-3.00376	-2.26931	4.64848e-06	1.2586e-06
6409	0.358775	3.0383	-2.82644	2.90059e-06	7.39602e-07
6411	-2.2303	0.605447	-1.69728	0.00100158	0.000576155
6413	-3.00913	0.603663	-3.45669	2.90059e-06	7.39602e-07
6424	0.266742	-2.72991	3.30092	3.18349e-05	1.14926e-05
6432	-0.338474	2.94846	-3.3189	3.69133e-05	1.35605e-05
6433	0.763436	2.19663	-1.45644	0.000513595	0.000268667
6442	-1.38351	2.01216	-3.78446	3.22361e-07	4.98547e-08
6450	-0.740522	1.50516	-1.8815	0.00871563	0.00674339
6451	4.18275	0.470981	3.82141	3.4341e-08	3.32734e-09
6452	0.756755	2.40895	-1.73416	2.53697e-05	8.87523e-06
6464	-4.07798	-1.44472	-2.51646	3.20083e-09	1.62243e-10
6465	-4.11022	1.82481	-4.94367	1.2861e-09	5.94452e-11
6473	0.627076	2.66681	-1.44779	0.00187271	0.0011827
6479	-1.66762	-2.95684	1.78318	0.000969425	0.000557234
6480	-3.83412	-0.938183	-1.69868	0.00196338	0.00124211
6481	-4.24487	0.130061	-3.87207	2.90059e-06	7.39602e-07
6497	1.01069	-3.97167	4.76628	3.4341e-08	3.32734e-09
6498	-2.3697	1.92718	-4.03112	8.50109e-06	2.53263e-06
6499	-1.87576	2.66598	-4.54547	2.90059e-06	7.39602e-07
6500	-0.0534408	3.20405	-2.98123	2.73104e-05	9.72166e-06
6522	-3.49255	-1.34013	-1.67532	0.00764302	0.00585993
6526	-1.50334	2.48509	-3.23853	0.000217069	0.000102805
6527	-0.2989	-4.54156	4.12469	3.50254e-11	7.40949e-13
6528	0.640667	-3.74683	4.43977	3.59302e-09	2.20382e-10
6529	-2.54162	-4.03635	1.49473	6.92634e-06	1.9937e-06
6537	0.0708912	2.52753	-2.41837	4.89561e-05	1.85958e-05
6539	2.03825	3.3585	-1.75454	0.00177904	0.00111458
6544	-1.05362	2.36985	-2.49222	0.00131916	0.000794384
6545	-0.104264	-3.67541	4.32899	4.86853e-09	3.09282e-10
6549	-2.74362	1.37856	-3.65946	6.02312e-05	2.36175e-05
6551	0.928444	2.41517	-1.84293	0.00221829	0.00143302
6553	-1.53684	0.994145	-1.69926	0.000140431	6.22017e-05
6554	-0.469687	1.08212	-1.48864	0.000710338	0.000392437
6556	2.89137	-3.64034	6.15891	4.71486e-07	7.488e-08
6557	2.86291	-4.33648	6.8663	1.01571e-07	1.1125e-08
6560	-3.7893	-2.74912	-1.67173	0.00125808	0.000747408
6567	-0.0774295	2.65727	-2.20772	0.00366084	0.00253572
6572	1.04693	2.72214	-1.7604	0.00417617	0.00296311
6581	-0.58174	-1.99904	1.8802	9.38735e-05	3.89889e-05
6582	-3.53772	-1.19398	-1.78037	0.00417617	0.00296311
6583	-3.27835	3.11294	-5.47321	0.000516724	0.000274945
6592	-2.327	-4.99374	2.8149	1.33654e-06	2.44765e-07
6593	-0.312614	-3.466	2.57032	0.000158749	7.17414e-05
6594	0.919474	-4.47682	4.55342	2.53697e-05	8.87523e-06
6597	-3.27313	2.63543	-5.86661	2.90059e-06	7.39602e-07
6609	-0.761897	1.94114	-2.70304	2.03831e-05	6.9298e-06
6613	0.0330512	1.65375	-2.05813	0.000377341	0.000190034
6617	-0.499279	2.17733	-2.86009	2.90059e-06	7.39602e-07
6622	-3.73531	-1.39023	-2.16264	5.67761e-05	2.21881e-05
6625	-3.92689	2.72761	-6.21787	0.000677416	0.00037128
6629	-0.861708	2.12659	-1.96617	0.000612057	0.000330363
6630	-1.5504	1.51075	-3.20455	5.97221e-07	9.97093e-08
6631	-2.44296	0.0445987	-2.53651	0.0041255	0.00291403
6645	1.36929	-3.02122	3.81196	0.000219845	0.000104264
6658	1.85742	-1.72	4.04705	1.27371e-09	5.80356e-11
6660	-4.75989	-1.90992	-2.46617	0.000273168	0.00013215
6661	-4.0815	0.712481	-2.40678	0.00138435	0.000835766
6663	-0.99252	-4.27091	2.83833	0.000294443	0.000144222
6665	-0.424591	1.86539	-2.03461	0.000270833	0.000130819
6667	-4.25169	-2.33424	-1.83769	2.68477e-07	3.317e-08
6674	-1.2322	1.56563	-2.79783	0.000513595	0.000268667
6688	-1.34848	1.76373	-2.84495	0.00274316	0.00182978
6692	0.951986	2.59619	-1.51834	0.0041255	0.00291403
6693	-3.33242	1.51349	-4.25813	0.0085771	0.00660615
6708	2.26943	-3.78829	5.72103	0.000317109	0.00015713
6714	-0.37452	2.46864	-2.95389	0.00039448	0.000201172
6716	1.44911	2.27724	-1.49356	0.00104268	0.000602011
6717	0.216917	1.61821	-2.59505	0.000887147	0.000503332
6721	1.27888	2.75425	-1.85449	6.36992e-05	2.53262e-05
6722	2.77557	-0.0645625	2.20047	5.04802e-05	1.92742e-05
6736	3.12064	-0.611416	3.21951	0.00274316	0.00182978
6737	-4.19218	-1.48633	-3.19727	1.27279e-05	4.02608e-06
6746	-2.53697	0.0843456	-2.00262	0.00501092	0.00363662
6747	-2.58681	2.01296	-3.47272	2.53697e-05	8.87523e-06
6748	-3.27162	-0.168725	-2.99916	3.28373e-09	1.68323e-10
6751	1.71889	3.23477	-1.98728	4.66127e-06	1.26309e-06
6757	0.890731	2.67427	-1.71519	0.000361154	0.000180695
6770	0.799768	2.86114	-2.10714	0.000126868	5.5166e-05
6771	-0.350233	1.44278	-2.64251	0.00501092	0.00363662
6772	-2.84619	0.371697	-2.9756	0.000217069	0.000102805
6792	-1.88462	2.53304	-3.91804	5.29682e-06	1.4792e-06
6796	1.68927	3.50756	-1.57892	0.00359176	0.0024863
6798	-5.2249	-1.3525	-3.90046	2.90059e-06	7.39602e-07
6829	0.954427	3.26318	-1.55759	0.00177904	0.00111458
6833	2.75318	-3.11663	5.98833	3.59302e-09	2.20382e-10
6835	3.15352	-2.13294	5.03147	4.96727e-18	1.30574e-20
6837	3.32387	-0.597382	4.02511	9.54164e-08	1.03673e-08
6841	-4.44938	-0.77629	-3.82787	1.58405e-05	5.10917e-06
6846	2.675	0.50995	2.18184	0.00419346	0.00298365
6851	-0.36478	1.96676	-2.05474	0.00488508	0.00351854
6874	-0.0167299	1.56788	-3.04713	9.63277e-06	2.95841e-06
6880	-1.03918	0.795782	-3.22962	0.000114421	4.89183e-05
6881	-2.75276	-1.27969	-1.5771	0.000109193	4.62367e-05
6885	-2.61033	-0.237586	-2.37274	0.00488508	0.00351854
6888	-1.09392	-4.09298	2.70099	0.00018845	8.70215e-05
6892	1.17683	-1.62353	3.39805	9.41475e-07	1.62759e-07
6893	-4.17673	-0.553048	-3.23505	0.000217069	0.000102805
6904	-0.888605	-2.44636	2.0265	0.000188265	8.68536e-05
6906	-0.515915	-3.65971	2.8061	0.00131916	0.000794384
6918	-2.31604	0.077841	-2.90659	1.82367e-06	3.51951e-07
6925	-4.27278	-3.10091	-1.71708	0.00126443	0.000752011
6928	-0.375169	-4.54274	3.33992	2.04243e-09	1.00306e-10
6936	-3.60284	-1.36902	-2.36986	0.00221978	0.00143495
6938	-4.14642	-1.78831	-2.47975	0.00174908	0.00108393
6940	0.0506947	2.7758	-2.87863	9.63277e-06	2.95841e-06
6949	-2.59706	0.826222	-3.43475	1.17292e-07	1.33094e-08
6954	-1.85995	-3.49132	1.85405	0.000546579	0.000291908
6965	0.785208	2.1531	-1.65354	0.000377341	0.000190034
6966	2.35506	0.0870974	1.63233	0.00753991	0.005761
6976	-1.0442	1.30824	-1.78874	0.00936658	0.00735169
6979	0.268829	-1.39889	1.44108	0.00469298	0.00335448
6986	-2.08343	2.49805	-2.81333	0.00567119	0.00416163
6987	-2.07825	-4.03994	2.04793	2.26256e-07	2.73588e-08
6990	0.875922	-2.88377	3.94955	2.53697e-05	8.87523e-06
6992	-0.254491	-2.81111	2.96146	2.50264e-07	3.06332e-08
7003	-3.93643	-3.15956	-1.52605	0.000216927	0.000101454
7006	-2.54464	-4.34681	2.49283	2.90059e-06	6.45141e-07
7013	-0.968713	-4.01881	3.05009	6.94962e-06	2.01562e-06
7014	0.425287	3.033	-2.26966	0.000621024	0.000337516
7015	3.31175	-4.22767	6.20589	1.11153e-06	1.95945e-07
7022	0.557213	-2.35589	2.59693	1.20193e-05	3.77297e-06
7025	2.08098	-2.79674	4.14808	1.19367e-08	8.31329e-10
7029	-4.77014	-1.44999	-3.15175	5.29682e-06	1.4792e-06
7039	2.88941	-2.72252	5.3725	2.90059e-06	7.39602e-07
7042	0.849964	-2.33738	3.28629	3.22361e-07	4.98547e-08
7068	-3.40977	1.44543	-4.59018	1.32493e-10	3.8021e-12
7074	-0.00465118	2.76617	-2.81222	0.00177904	0.00111458
7075	-4.0305	-0.932723	-2.51334	2.3407e-06	4.60654e-07
7079	-0.12783	2.78014	-2.74575	0.00753991	0.00576106
7087	1.92764	-0.875883	2.77233	0.00222948	0.00144513
7092	-0.284616	-2.57923	2.17119	3.50254e-11	7.44241e-13
7093	0.909807	-0.949862	2.9654	6.36992e-05	2.53262e-05
7094	0.689302	-2.09974	2.08602	0.000621024	0.000337516
7103	-1.57084	1.95249	-3.20404	0.00177904	0.00111458
7115	3.48034	-2.45748	5.78493	3.4341e-08	3.32734e-09
7124	0.774378	-2.53953	2.4484	0.00244957	0.00159316
7126	0.583493	2.82261	-2.2172	0.00203357	0.00129097
7128	3.05854	-2.50739	5.04392	0.000158749	7.17414e-05
7136	0.539402	-4.47832	5.17024	4.12422e-07	6.5319e-08
7138	1.5348	-4.31811	5.46985	6.07285e-05	2.38923e-05
7139	0.444654	-4.60214	4.62333	2.14072e-06	4.17358e-07
7156	-2.61663	-4.55898	1.58901	1.41422e-13	1.54899e-15
7157	-2.05894	0.565902	-2.43357	0.000873739	0.000495534
7158	-1.37731	-4.10968	2.72135	2.90059e-06	5.98256e-07
7160	-0.101042	-3.27572	3.41283	3.22361e-07	4.54582e-08
7161	0.469867	-4.408	4.91657	9.71451e-10	4.27737e-11
7165	-2.73274	0.128145	-2.86088	5.97221e-07	9.97093e-08
7176	-0.102325	3.41767	-3.55188	7.71879e-06	2.2759e-06
7178	-3.30526	1.95597	-5.26123	3.22361e-07	4.98547e-08
7187	-0.473694	-4.03056	2.55449	1.07619e-07	1.1811e-08
7188	1.6078	-4.63188	6.09517	3.90914e-11	9.50526e-13
7218	-4.34632	-1.26257	-3.05365	1.78589e-06	3.36834e-07
7221	0.390822	-1.83921	2.4912	1.08157e-05	3.37859e-06
7229	0.519648	-4.96107	4.2405	5.29682e-06	1.49564e-06
7247	-0.858492	-2.33766	1.60882	0.000711848	0.000393894
7248	0.858737	-2.41525	3.34783	3.22361e-07	4.98547e-08
7249	0.510754	-4.39749	4.49072	3.22361e-07	4.98547e-08
7250	0.0279303	-4.42088	4.57657	3.90914e-11	9.50526e-13
7251	0.819214	-4.33885	5.45754	3.4341e-08	3.32734e-09
7252	0.188078	-4.37117	4.4259	2.90059e-06	7.39602e-07
7254	1.65102	-3.89166	3.97442	8.97689e-05	3.71464e-05
7257	-2.938	-0.900588	-2.07994	0.00331095	0.00224768
7260	-0.121209	-4.27138	3.84654	5.39409e-08	5.41182e-09
7270	-3.56955	0.910224	-3.71122	0.000158749	7.17414e-05
7284	0.147371	2.62771	-1.99764	0.00195848	0.00123816
7296	-0.564575	2.44316	-2.77344	0.00607731	0.00451305
7305	-4.48924	-2.57467	-1.67039	0.00871563	0.00674339
7306	-0.139044	-5.0416	4.73632	3.06838e-13	4.03292e-15
7322	0.308456	-1.98784	1.53342	0.00297624	0.00200024
7331	-1.59732	3.27795	-4.98973	2.90059e-06	7.39602e-07
7334	1.85149	-0.9101	3.28233	0.0017886	0.00112214
7346	-1.3142	-3.91994	2.73564	0.00952335	0.00748517
7358	0.705475	-4.23984	4.28711	2.90059e-06	7.39602e-07
7367	2.75321	-2.23407	4.78264	5.97221e-07	9.98203e-08
7368	3.55844	-2.83816	5.91384	3.90914e-11	9.50526e-13
7373	0.345254	-4.31717	4.30397	2.90059e-06	7.39602e-07
7387	0.148755	-2.67365	2.24085	0.00200974	0.00127452
7394	-1.64319	-3.6646	1.96744	7.87978e-07	1.3412e-07
7399	-3.35177	-1.11599	-1.75568	0.00183051	0.00114923
7400	-4.00566	-1.70838	-1.89911	0.000612057	0.000330363
7406	0.809138	2.76767	-1.90383	0.000335286	0.000167312
7420	-2.87582	-1.34979	-2.24174	0.00871563	0.00674339
7428	-0.573318	-4.56133	4.47127	8.59529e-13	1.28035e-14
7430	-4.60869	-1.47872	-2.9896	1.33262e-06	2.43754e-07
7442	0.332703	-4.36674	2.94716	5.04802e-05	1.92742e-05
7444	-2.65304	2.07924	-4.29428	1.58405e-05	5.17722e-06
7448	0.135612	-1.81824	1.61403	0.00655174	0.00490555
7449	1.94959	-2.11213	4.15827	0.000926846	0.000530525
7450	2.80137	-2.92097	5.48761	3.90914e-11	9.50526e-13
7458	-2.29381	-2.97343	2.04239	0.00311592	0.00210709
7459	-0.864973	-4.34938	4.42386	3.58553e-06	9.36806e-07
7460	-0.0361253	2.952	-2.98813	0.00359176	0.0024863
7461	-3.87708	0.336393	-4.3157	3.4341e-08	3.32734e-09
7470	2.81369	-2.19462	4.93868	2.90059e-06	7.39602e-07
7475	-4.17031	-2.93753	-1.69223	0.00229636	0.00148899
7484	1.54643	2.31337	-1.89	0.000611015	0.000328532
7490	0.65662	2.59493	-2.14469	6.94962e-06	2.01562e-06
7492	-0.127244	2.886	-2.6271	0.000294443	0.000144222
7504	-2.09309	-0.322181	-1.77895	0.000611847	0.000329848
7505	-0.624045	1.85802	-1.86214	0.00732665	0.00555959
7506	-3.81449	1.12285	-4.64254	3.4341e-08	3.32734e-09
7510	0.350254	3.01239	-2.90674	3.4341e-08	3.32734e-09
7517	1.62807	-1.30016	2.6389	1.17292e-07	1.30489e-08
7521	-2.93421	2.67771	-4.85531	0.00753991	0.00576106
7523	0.185731	2.20782	-1.72233	2.03831e-05	6.9298e-06
7530	0.21154	2.66919	-2.31789	0.00759089	0.0058183
7539	1.85888	3.27195	-1.45199	0.000135377	5.97259e-05
7546	0.612159	2.35732	-1.42935	0.00171313	0.00105978
7547	-0.987761	1.22866	-2.45469	2.53697e-05	8.87523e-06
7548	0.635584	2.40664	-1.69326	0.000493277	0.000256201
7549	0.158469	1.78643	-1.74554	6.30748e-05	2.49121e-05
7551	-0.7329	1.74772	-2.67999	2.27287e-05	7.76212e-06
7553	-0.0183335	1.94426	-2.47024	2.96419e-06	7.57117e-07
7554	0.366087	3.0549	-2.74156	0.00337305	0.00231643
7563	-2.73083	0.12011	-2.25274	0.00688166	0.00516614
7569	-4.11119	-1.87902	-2.61173	0.00307622	0.00207754
7571	0.275679	2.24328	-2.09984	0.00177904	0.00111458
7572	-3.33935	1.58478	-3.71838	1.05202e-12	1.61317e-14
7576	-2.70943	-4.07846	1.40685	0.0041255	0.00291403
7578	-0.501386	2.56588	-3.01455	2.90059e-06	7.39602e-07
7579	0.576466	2.39351	-1.97865	0.00148004	0.000904561
7580	-3.1523	1.65509	-4.17006	0.00010758	4.53179e-05
7581	-0.946944	2.90596	-3.55832	3.4341e-08	3.32734e-09
7589	0.288101	2.37997	-1.97464	1.61108e-05	5.2938e-06
7590	-3.27964	-0.0133108	-3.19621	0.00039448	0.000201172
7591	-5.30494	-3.62472	-1.48004	0.00256258	0.00167676
7595	-0.173279	2.45198	-2.69433	0.000611015	0.000328998
7597	-0.335186	2.05159	-2.5422	0.00111164	0.000656027
7599	0.207896	3.30005	-3.35674	3.22361e-07	4.98547e-08
7620	0.236203	2.31794	-1.82326	0.00997611	0.0078738
7628	-3.78059	-1.35016	-2.27997	0.00753991	0.00576106
7639	-1.84587	2.97121	-5.07114	2.90059e-06	7.39602e-07
7646	1.72983	3.3047	-1.57487	0.00871757	0.00681174
7647	-1.808	3.03748	-4.88177	5.18052e-11	1.32776e-12
7648	3.42091	1.03145	2.57763	1.11153e-06	1.99419e-07
7650	-3.58522	2.05766	-6.01905	3.4341e-08	3.32734e-09
7652	-0.552901	2.9065	-3.44214	9.63277e-06	2.95841e-06
7653	2.1872	3.97415	-1.99238	0.000513595	0.000268667
7654	-1.34378	2.79039	-4.08382	2.90059e-06	7.39602e-07
7655	0.370056	2.58619	-1.7559	0.000516724	0.000274392
7659	0.790966	3.11187	-2.01292	0.00289701	0.00194382
7662	-2.09547	0.614006	-2.49625	1.58405e-05	5.17722e-06
7663	0.93868	2.85365	-1.87367	4.77518e-06	1.29604e-06
7666	-3.91022	-2.61326	-1.51495	3.71872e-06	9.87313e-07
7668	-1.54722	3.08787	-4.13284	3.59302e-09	2.20382e-10
7670	1.31542	-1.61987	2.66292	0.00221829	0.00143261
7681	-1.30785	3.02861	-3.92204	1.3649e-09	6.36852e-11
7682	-3.05779	1.86799	-4.56868	0.000873739	0.000495534
7685	1.86651	3.68548	-1.78153	0.000710338	0.000392437
7693	-2.31689	2.56702	-4.6414	1.10374e-07	1.21375e-08
7699	-3.84631	-0.642995	-2.82844	5.29682e-06	1.4792e-06
7733	-4.47965	-2.54971	-1.76959	0.00168731	0.00104122
7737	-2.89602	-1.73524	-1.69202	0.00111955	0.000662413
7738	-3.64376	-1.43714	-1.57328	0.000171757	7.8222e-05
7742	0.511052	3.01713	-2.63302	3.58553e-06	9.47239e-07
7744	-0.226385	-3.84451	3.3998	2.90059e-06	7.39602e-07
7747	-0.167159	-4.37386	4.04508	3.69133e-05	1.35605e-05
7749	0.511031	-4.55712	4.83804	2.90059e-06	7.39602e-07
7750	-2.12499	-3.66541	1.63978	0.00501092	0.00363662
7751	-0.572636	-4.10927	3.20996	1.45375e-18	1.91074e-21
7752	-0.961755	-3.49932	3.13302	3.8112e-07	5.9944e-08
7753	-2.27569	-3.97084	1.83018	0.00488508	0.00351854
7757	0.576194	-1.96636	2.65441	0.00274316	0.00182978
7758	2.03375	-0.710893	2.78145	2.90059e-06	7.39602e-07
7760	-0.279995	-3.34757	3.94076	1.82069e-06	3.48983e-07
7764	-1.01614	-3.08269	1.88034	0.00134204	0.000808753
7765	-2.03509	1.13802	-2.94287	0.00331095	0.00224768
7777	-0.393734	-3.12155	2.62648	5.14329e-05	1.96718e-05
7778	-0.526142	-1.92713	1.50114	0.00010758	4.53179e-05
7785	-0.102017	-2.69754	2.4031	0.000114421	4.95534e-05
7789	-1.60045	-4.27197	2.08682	3.69473e-05	1.35811e-05
7793	-1.13854	-3.24349	2.23274	5.67761e-05	2.21881e-05
7801	2.20253	-3.18811	4.83824	1.2861e-09	5.94452e-11
7802	-0.406685	-2.96001	2.72724	2.70145e-17	1.06519e-19
7803	1.87675	-2.87752	4.76443	3.4341e-08	3.32734e-09
7807	-1.27174	-3.60406	1.73287	0.000142238	6.30332e-05
7808	3.12769	-2.14016	4.68838	3.59302e-09	2.20382e-10
7809	-0.052975	-2.8583	3.1489	1.98834e-11	3.8765e-13
7810	0.296204	-3.08676	2.61548	6.50227e-13	9.25843e-15
7814	-0.412462	-3.3834	2.67989	9.52277e-08	1.0305e-08
7815	1.96087	-3.05303	4.6676	0.00018845	8.70215e-05
7816	-1.5789	-3.95629	2.14132	1.08731e-06	1.89833e-07
7825	-2.33015	3.18613	-5.32304	0.00871757	0.00681174
7826	-4.37863	-2.18328	-1.78954	0.00158085	0.000971368
7828	-4.03188	-1.78267	-2.05066	3.58553e-06	9.47239e-07
7834	-1.29696	-3.98839	2.32965	0.000249288	0.00011921
7835	-3.61698	0.222263	-1.9524	0.00832418	0.00640223
7842	-0.66675	2.48983	-3.00918	2.90059e-06	7.39602e-07
7845	-4.64514	-1.94019	-2.54217	1.17292e-07	1.32756e-08
7849	-1.69939	1.11796	-2.1668	0.00280333	0.00187728
7852	-2.55361	2.42958	-3.92229	7.20356e-09	4.82867e-10
7865	-0.0901536	2.28956	-2.21044	0.000516724	0.000274392
7867	0.325752	-3.9807	4.08885	3.72529e-12	6.20201e-14
7868	-0.244449	-3.88248	3.63803	2.90059e-06	7.39602e-07
7874	-4.1908	3.04156	-6.94519	3.22361e-07	4.98547e-08
7880	-4.62596	-3.36379	-1.57391	0.00141186	0.000857939
7884	-4.46603	2.06604	-5.94049	2.90059e-06	7.39602e-07
7892	1.35036	-2.90251	4.0781	0.00308513	0.00208559
7898	-1.13967	2.06118	-2.89488	1.32487e-05	4.19955e-06
7908	-3.44282	0.99641	-3.10792	2.90059e-06	5.96796e-07
7914	0.797121	2.09985	-1.64748	0.000335286	0.000167312
7915	-0.867947	1.94321	-3.29281	0.00337305	0.00231643
7917	0.500099	2.74779	-2.79879	0.00148004	0.000904561
7921	-0.623569	2.23008	-2.26908	0.00488508	0.00351854
7938	-0.255233	-3.54203	3.37762	1.11153e-06	1.99419e-07
7939	-1.61876	-4.04174	2.34083	3.84985e-14	3.87937e-16
7942	-0.800419	1.85266	-1.97336	0.00158085	0.000971368
7944	0.261073	2.85572	-2.5754	2.90059e-06	7.39602e-07
7945	-1.83498	-3.47682	1.69932	0.00732665	0.00555959
7948	4.10818	-4.18741	8.08198	3.59302e-09	2.20382e-10
7949	0.434114	-3.71729	3.94674	1.25088e-05	3.94308e-06
7951	1.38126	-3.76929	4.6216	2.90059e-06	7.39602e-07
7952	-4.02503	1.73742	-5.3381	2.90059e-06	7.39602e-07
7953	-0.585789	2.38428	-2.87536	0.000317109	0.00015713
7956	-2.19695	2.03965	-4.00828	3.14804e-07	3.93771e-08
7957	0.291543	3.06273	-2.85518	1.43886e-08	1.03369e-09
7958	0.37017	2.94956	-2.90684	2.90059e-06	7.39602e-07
7959	0.471961	-2.1569	2.14092	2.90059e-06	7.39602e-07
7960	3.80632	-5.93461	9.68979	2.90059e-06	7.39602e-07
7961	0.658563	-1.58692	2.48479	0.000108211	4.56074e-05
7962	0.179602	2.98831	-3.14478	0.000294443	0.000144222
7963	0.578405	-5.1371	5.57427	2.90059e-06	5.98256e-07
7965	1.78542	3.32136	-2.26509	8.50109e-06	2.53263e-06
7966	0.790414	3.22951	-2.13785	6.36992e-05	2.53262e-05
7967	-1.27025	-4.58088	3.31954	4.73115e-07	7.52424e-08
7970	2.48387	-0.434237	2.03371	0.00221829	0.00143302
7972	-3.16768	2.72078	-6.13217	3.22361e-07	4.98547e-08
7983	-3.89752	0.880774	-4.87898	3.56092e-10	1.45089e-11
7984	-4.64974	-0.690614	-3.99065	2.04243e-09	1.01562e-10
7991	-1.67602	1.40815	-2.66869	0.000223184	0.000106239
8005	-3.18698	-1.72319	-2.19711	3.22361e-07	4.98547e-08
8013	1.93057	-4.6073	5.84102	3.72529e-12	6.20201e-14
8014	0.623778	-4.38996	4.39129	0.00871757	0.00681174
8034	0.794482	2.38127	-1.49316	9.18934e-08	9.91721e-09
8035	-2.84784	0.310269	-3.39848	0.000621024	0.000337516
8038	-4.23033	-0.203126	-3.79479	1.17292e-07	1.33094e-08
8043	-3.03031	-0.520025	-2.48945	2.90059e-06	7.39602e-07
8049	-0.329555	2.09793	-2.3911	6.62331e-09	4.35267e-10
8060	-4.66915	-2.41052	-2.48468	0.000677416	0.00037128
8062	-3.36117	2.67347	-4.60694	3.99719e-07	6.32195e-08
8063	-4.07769	-0.606108	-2.20105	0.0082277	0.00631722
8072	-1.08729	-4.70541	2.80544	3.18349e-05	1.14926e-05
8073	-2.16242	-4.14655	2.08738	0.000216927	0.000101454
8075	0.987335	2.66362	-1.87061	0.000158749	7.17414e-05
8076	-0.878218	-4.1388	2.72608	5.29682e-06	1.4826e-06
8078	2.06054	3.72047	-1.67602	0.00655174	0.00490555
8084	-0.0963758	-3.6324	3.58138	2.67628e-08	2.01674e-09
8085	0.589509	-4.29842	4.41976	2.21867e-07	2.66823e-08
8091	-2.68316	2.7698	-4.80273	3.22361e-07	4.98547e-08
8092	-1.70157	-3.49026	1.79656	2.03831e-05	6.89758e-06
8102	-3.78439	0.095439	-4.17052	6.79314e-10	2.90178e-11
8120	2.77675	0.930866	1.63019	4.05166e-06	1.08015e-06
8122	1.59601	2.48266	-1.40387	5.63075e-06	1.59733e-06
8130	-1.46627	-3.80322	2.58177	5.67761e-05	2.21881e-05
8131	-0.403813	-3.44953	3.0975	5.97221e-07	9.93845e-08
8132	-0.60704	-4.58015	3.75704	9.63277e-06	2.95841e-06
8133	-0.784131	-3.50096	2.61599	6.84547e-08	7.10789e-09
8134	-0.937477	-3.88611	2.38919	0.00216329	0.00137664
8138	-1.93621	-4.5207	2.58449	2.73104e-05	9.72166e-06
8139	1.17155	-3.91906	5.5962	3.59302e-09	2.20382e-10
8148	2.42909	-0.526278	2.95536	5.29682e-06	1.49564e-06
8161	0.606357	2.85372	-2.45895	2.90059e-06	7.39602e-07
8169	-3.84087	-0.637987	-3.18575	1.35007e-07	1.55265e-08
8175	-0.836189	2.04334	-2.73883	3.44235e-13	4.59986e-15
8182	-3.48026	-0.925419	-2.13501	1.77936e-05	5.90131e-06
8185	0.507528	1.90656	-1.85252	0.00111164	0.000656027
8186	0.0816874	1.6567	-1.57501	3.22361e-07	4.98547e-08
8189	-2.43674	1.10751	-2.91514	5.29682e-06	1.4792e-06
8197	-1.91991	0.235743	-2.04659	0.00010758	4.53179e-05
8203	-1.10731	1.65925	-2.44172	0.000677416	0.00037128
8211	-2.31351	2.72263	-5.51368	3.22361e-07	4.98547e-08
8214	1.41814	3.00508	-1.58177	1.80683e-06	3.41972e-07
8218	-1.91116	0.336127	-2.18551	0.00871757	0.00681174
8228	-2.51231	-0.915763	-1.49299	0.00871757	0.00681174
8230	0.547672	1.46123	-1.41311	0.00906483	0.00710492
8238	-3.13485	2.65536	-6.29034	6.36992e-05	2.53262e-05
8239	1.27508	3.25806	-2.42362	1.82069e-06	3.48983e-07
8246	-4.33008	0.522134	-4.81303	3.22361e-07	4.98547e-08
8284	1.75458	3.0432	-1.62018	0.000784403	0.000437478
8289	-2.91182	-4.25501	1.41508	0.00274316	0.00182978
8293	-0.893434	2.93871	-3.91277	3.22361e-07	4.98547e-08
8294	0.614886	-2.36169	2.2584	4.942e-08	4.91494e-09
8303	-0.564556	-3.64102	4.17427	2.10009e-10	6.44057e-12
8304	1.61724	3.39632	-1.66483	0.000482826	0.000250456
8305	0.392949	-2.87599	2.87785	8.74378e-07	1.50742e-07
8312	-3.81984	-0.362785	-3.09123	0.000126289	5.4859e-05
8313	0.506244	-1.63562	1.87575	1.17292e-07	1.32756e-08
8319	-1.10574	-2.83037	1.73884	0.00039448	0.000201172
8324	-0.622523	2.92314	-3.34849	3.4297e-08	2.64459e-09
8330	-0.534385	2.85326	-3.13629	2.90059e-06	7.39602e-07
8333	-3.05325	-4.60557	1.59062	0.000377341	0.000190034
8336	0.163878	2.07542	-1.89684	1.11153e-06	1.99419e-07
8341	0.501071	4.54166	-4.18218	8.1312e-06	2.40285e-06
8345	1.04957	2.55161	-1.43609	0.00373027	0.0025928
8353	0.803842	2.4728	-1.93404	0.000177432	8.13506e-05
8367	-0.318258	-3.25748	3.31409	2.23565e-07	2.69845e-08
8376	0.168554	-1.9544	2.07475	3.22361e-07	4.30951e-08
8378	-1.22493	-3.75458	1.71679	3.20229e-06	8.23547e-07
8393	-1.20763	2.29252	-3.58693	3.45435e-07	5.38772e-08
8394	0.595915	2.41774	-1.61117	0.000269256	0.000129467
8402	-3.42658	3.1058	-6.54515	3.4297e-08	2.64459e-09
8404	-1.48314	-3.84978	1.57995	0.00993232	0.00781313
8408	0.37384	-3.17501	3.33558	2.90059e-06	7.39602e-07
8411	-4.34482	-1.00292	-2.91643	4.59196e-06	1.2411e-06
8420	0.119827	2.94787	-2.89004	1.07081e-05	3.34026e-06
8434	0.621675	2.72163	-2.54612	0.00221829	0.00143261
8436	-2.29954	2.13939	-3.64073	0.00177904	0.00111458
8437	-2.12706	1.12358	-2.72237	8.2825e-05	3.40009e-05
8438	-1.18707	2.32952	-2.50153	0.00274316	0.00182978
8439	-0.406662	1.68677	-2.46019	1.23993e-08	8.8153e-10
8441	-3.4913	-0.795382	-2.79311	0.00732665	0.00555959
8444	-0.00825149	2.35675	-2.48541	0.00501092	0.00363662
8450	0.702702	3.55037	-3.36676	0.00177904	0.00111458
8452	-0.149102	-3.72037	3.45058	9.12094e-08	9.67039e-09
8454	-2.74081	1.50933	-4.07409	5.29682e-06	1.49564e-06
8478	-2.22027	1.77531	-4.05437	3.56092e-10	1.45089e-11
8480	-3.87001	-2.17406	-1.69283	0.00126443	0.000752011
8482	0.57152	2.38549	-1.83184	0.000516724	0.000274945
8483	0.992906	2.53568	-1.88019	2.17553e-05	7.4249e-06
8484	1.12715	0.257959	1.54346	0.00501092	0.00363662
8485	-3.71494	1.27768	-4.51687	1.27371e-09	5.80356e-11
8487	1.93661	0.206969	1.50009	0.00039448	0.000201172
8500	-0.575405	1.35408	-2.00395	1.35374e-10	3.9441e-12
8508	0.11599	2.81428	-2.54686	9.87791e-06	3.04452e-06
8509	0.836721	2.51068	-2.0236	0.000915931	0.000523275
8516	-0.511169	3.09985	-3.63392	2.90059e-06	7.39602e-07
8517	0.0290211	1.88631	-2.19499	0.00177904	0.00111458
8531	-0.214154	-1.72105	2.33433	2.87505e-06	5.72492e-07
8544	-0.125535	2.92235	-2.77872	2.90059e-06	7.39602e-07
8545	0.575814	2.53658	-1.61551	2.73104e-05	9.72166e-06
8547	0.284021	2.81409	-2.53006	0.00111955	0.000662413
8548	-0.143869	2.47153	-3.17294	0.00337305	0.00231643
8549	-0.441288	2.00896	-2.41009	1.4345e-06	2.67103e-07
8550	0.783818	-4.19798	5.22165	2.13902e-10	6.65368e-12
8556	1.9032	-3.79316	5.39371	3.56092e-10	1.45089e-11
8557	-1.37102	-3.98162	2.21271	7.87978e-07	1.3412e-07
8558	-0.0649081	-3.47033	3.52532	3.22361e-07	4.98547e-08
8571	-4.19554	0.175548	-3.91384	0.000188265	8.68536e-05
8586	-0.139028	2.39952	-2.72185	0.000216927	0.000101454
8588	-3.70247	-1.45073	-1.84715	0.000206664	9.58851e-05
8590	0.689537	1.6583	-1.75706	0.0037912	0.00264198
8591	1.64914	2.25672	-1.46178	0.00732665	0.00553034
8593	0.679086	2.83046	-1.7956	0.00221829	0.00143261
8607	0.720059	3.00643	-2.30888	0.000173462	7.93783e-05
8608	-0.906442	1.69529	-3.1517	0.00274316	0.00182978
8611	-0.426551	1.7454	-1.80954	0.00607731	0.00451305
8614	0.411982	2.86762	-2.429	0.00221829	0.00143261
8615	-0.966092	-4.32701	2.97436	0.00103205	0.000595492
8619	0.908296	-0.0863183	1.43739	0.0041255	0.00291403
8621	0.246929	2.43772	-1.60072	0.00111164	0.000656027
8628	-2.59331	-1.3721	-1.51167	0.00936658	0.00735169
8632	-4.54701	-2.66884	-1.83584	2.90059e-06	7.39602e-07
8641	0.632032	-1.09314	1.65986	3.64196e-07	5.6963e-08
8645	0.701985	3.00692	-1.89034	0.00111164	0.000646216
8647	4.0655	-2.92882	6.55446	3.4341e-08	3.32734e-09
8652	-2.46465	-0.280924	-2.20489	1.07081e-05	3.34026e-06
8656	2.81941	-2.84577	5.00336	1.4345e-06	2.66669e-07
8660	-1.27458	2.53538	-2.82923	0.00567119	0.00416177
8665	-2.17803	-4.28722	2.10919	5.97901e-06	1.71446e-06
8674	-1.43886	-4.59864	2.61248	4.89113e-06	1.32966e-06
8687	0.562586	-3.50593	4.31827	1.27371e-09	5.80356e-11
8688	1.19685	-2.99774	4.19459	6.36992e-05	2.53262e-05
8689	0.782774	-3.82295	2.8774	7.62745e-06	2.2189e-06
8695	-2.66867	2.46134	-4.76819	0.000677416	0.00037128
8696	-4.34938	-2.04124	-1.64065	0.00171313	0.00105978
8724	-4.20621	-0.571721	-3.33664	0.00567119	0.00416177
8735	-0.156307	2.37745	-2.48155	0.000157953	7.06894e-05
8741	1.31637	-0.633888	2.1959	6.56964e-05	2.61778e-05
8753	-0.494662	2.3159	-2.67971	0.00161581	0.000995324
8754	-1.64937	3.11864	-4.75196	3.69133e-05	1.35605e-05
8755	-0.757325	3.20216	-3.76554	3.22361e-07	4.98547e-08
8758	0.612399	3.32751	-2.83321	8.47943e-06	2.51837e-06
8760	-0.801647	1.04883	-1.45223	0.00607731	0.00451305
8762	-2.85349	0.0516604	-2.90515	0.0082277	0.00631722
8770	-3.93092	-1.57814	-2.72447	0.00141186	0.000857939
8797	0.0391701	-3.29968	2.64233	0.000217069	0.000102805
8798	0.562176	-3.71884	3.17052	7.38056e-05	2.97324e-05
8800	0.272808	-4.50494	5.01562	3.4341e-08	3.32734e-09
8806	-0.326889	-2.37459	3.94247	9.60989e-06	2.88402e-06
8807	1.16996	-4.44943	5.17765	1.28692e-11	2.4808e-13
8811	0.265278	-2.5027	1.81102	0.00417617	0.00296311
8812	1.18859	-4.18685	5.26095	3.4341e-08	3.32734e-09
8813	-0.369479	-3.31546	3.17732	0.000135377	5.97259e-05
8826	0.906579	2.87084	-2.55123	8.50109e-06	2.53263e-06
8831	-0.705674	-4.51257	3.59321	1.4345e-06	2.64352e-07
8843	0.789023	2.73161	-2.15393	2.90059e-06	6.48832e-07
8845	-0.26914	2.77733	-3.18814	6.62331e-09	4.35267e-10
8846	-1.70078	2.44649	-4.44407	0.000756831	0.000421272
8847	-0.59459	2.82462	-3.58223	0.00488508	0.00351854
8848	-1.97836	0.824313	-2.87417	0.000114421	4.95534e-05
8850	1.75926	-2.89821	4.75459	1.39982e-07	1.616e-08
8856	2.48062	1.04565	2.09658	4.12707e-06	1.10296e-06
8859	-1.32419	-4.12077	2.31183	3.77572e-05	1.3982e-05
8860	-1.18495	-4.90031	3.71536	3.22361e-07	4.98547e-08
8873	4.26967	-1.38195	5.38723	3.22361e-07	4.98547e-08
8875	2.87351	-3.11311	5.55734	2.77597e-14	2.43894e-16
8882	-0.377436	2.76929	-3.06819	6.88416e-05	2.74461e-05
8883	-0.155255	3.01051	-3.0032	7.71879e-06	2.2759e-06
8884	0.895468	2.7425	-1.84703	0.00221606	0.00141168
8886	-0.435507	2.86615	-2.54982	5.03237e-08	5.02686e-09
8887	1.12027	3.08537	-1.88141	7.63713e-06	2.23947e-06
8889	0.691588	2.90842	-2.21684	0.005382	0.00392361
8890	-1.46369	2.73537	-3.62034	1.22346e-07	1.39632e-08
8892	-0.0583009	2.63543	-2.49159	5.97221e-07	9.98203e-08
8896	0.777105	2.63793	-1.92954	0.000109193	4.62367e-05
8897	-0.23768	3.05393	-3.29768	0.000873739	0.000495534
8902	2.36031	-1.7158	3.66659	3.14804e-07	3.99281e-08
8918	-4.03696	0.963626	-4.57288	4.64444e-13	6.30789e-15
8935	0.154838	2.04784	-1.80633	5.90898e-07	9.55275e-08
8957	-3.85838	-0.561	-2.99935	1.50592e-14	1.22057e-16
8962	-3.06685	2.67858	-5.64375	1.11153e-06	1.99419e-07
8964	0.788937	2.72434	-2.18767	5.04802e-05	1.92742e-05
8967	-2.49008	0.614455	-2.35959	5.67761e-05	2.21881e-05
8987	-3.47228	1.44071	-4.38249	1.89165e-16	8.28764e-19
8989	0.790506	2.85817	-2.25307	1.4345e-06	2.66669e-07
8995	-0.390426	1.34995	-1.87403	0.00186826	0.00117457
8999	-4.04896	2.30457	-6.22823	2.90059e-06	7.39602e-07
9000	-2.22773	0.0886423	-2.38519	0.000114421	4.95534e-05
9004	-2.14313	1.96223	-4.43129	0.000756831	0.000421272
9005	-2.08142	2.23914	-3.73896	0.00158085	0.000971368
9011	-3.24324	-1.37998	-2.02562	2.65973e-08	1.98678e-09
9019	-3.50531	0.98593	-4.72115	3.22361e-07	4.98547e-08
9022	0.191048	2.60642	-2.17555	2.90059e-06	7.39602e-07
9040	0.453556	1.77803	-1.81209	0.00039448	0.000201172
9044	0.903828	3.1622	-1.62892	0.00753991	0.00576106
9048	-0.955508	1.63898	-2.27048	0.00580307	0.00426999
9050	0.493272	2.644	-1.8634	8.29335e-09	5.59551e-10
9051	-0.609017	1.84687	-2.5952	3.59302e-09	2.17443e-10
9052	-0.184674	2.29219	-2.72914	1.17006e-06	2.11714e-07
9053	-2.92236	-1.01934	-1.5103	0.00337305	0.002292
9054	-0.0442432	2.27592	-2.68287	0.000443066	0.000228958
9056	-1.85257	2.3083	-3.84466	3.56092e-10	1.45089e-11
9058	0.890099	3.3214	-1.99917	3.0001e-06	7.69575e-07
9073	1.86046	-2.47594	4.16184	2.65117e-13	2.96187e-15
9080	1.08779	2.93515	-1.62973	0.00111164	0.000656027
9085	0.770672	2.51284	-2.0471	0.000963221	0.000553034
9088	-0.0480282	1.99659	-1.89812	0.000303284	0.000148619
9089	2.14988	2.83342	-1.53302	2.00188e-06	3.86782e-07
9093	-0.179126	2.89307	-3.02724	2.90059e-06	7.39602e-07
9098	-4.65083	-2.48058	-2.11567	8.65414e-14	9.28922e-16
9104	-0.986917	2.28199	-2.51145	0.000104789	4.37059e-05
9117	-1.68509	0.128445	-2.09426	6.07285e-05	2.38923e-05
9118	1.06602	3.03194	-2.25476	0.000873739	0.000495534
9126	1.02256	2.93735	-2.05658	0.00262793	0.00172931
9127	0.105569	1.89955	-1.4079	0.000113644	4.82209e-05
9130	-2.00124	2.18276	-3.56635	1.15209e-11	2.14519e-13
9131	1.08981	2.62262	-1.50465	0.000270833	0.000130819
9134	0.601471	2.30827	-1.4764	8.73184e-08	9.20048e-09
9137	-1.57737	2.19194	-2.66538	3.73221e-06	9.91713e-07
9139	-0.280676	2.00343	-2.10872	6.133e-05	2.41424e-05
9141	0.422138	1.86646	-1.66928	0.00221829	0.00143261
9143	-2.3823	1.89734	-4.68969	1.11153e-06	1.99419e-07
9144	-1.74117	1.29328	-2.8165	2.69174e-17	1.0024e-19
9146	-3.3584	-1.16053	-2.11136	0.00308513	0.00208559
9147	-2.42965	1.94897	-4.84186	3.90914e-11	9.50526e-13
9148	-0.561124	2.54266	-2.38108	0.00274316	0.00182978
9157	1.3443	2.66607	-1.83491	0.00655174	0.00490555
9169	-0.92587	1.52404	-2.28096	0.00477917	0.00342551
9171	-0.061874	2.64477	-2.68238	0.000219845	0.000104264
9173	-0.425062	2.09942	-2.29246	2.90059e-06	6.4466e-07
9175	-2.71804	1.15702	-3.63039	3.4341e-08	3.32734e-09
9176	-4.20363	-2.22182	-2.23356	0.00274316	0.00182978
9178	0.910087	2.66205	-1.75197	0.00262793	0.00172931
9179	-2.6884	1.01743	-2.80446	3.22361e-07	4.29746e-08
9182	-1.1174	-3.0737	2.25712	0.000621024	0.000337516
9184	-0.435365	2.6859	-3.2887	3.08743e-07	3.82801e-08
9185	1.16645	2.61733	-1.90345	3.08254e-07	3.81519e-08
9187	0.806958	2.95683	-1.49757	0.00247224	0.00160953
9202	-1.92128	1.59083	-2.97184	9.90754e-07	1.72541e-07
9210	-0.172432	2.61388	-3.01836	4.5963e-11	1.14782e-12
9212	0.179754	1.92221	-2.0361	0.000611015	0.000328532
9217	-3.48235	-0.287007	-2.43206	7.18446e-05	2.86952e-05
9220	-0.848355	1.85687	-2.23886	6.41493e-08	6.50627e-09
9222	0.303983	2.12926	-1.72501	0.00417721	0.0029666
9223	0.0270707	2.35529	-2.11789	0.00127271	0.000757768
9224	1.1074	2.14458	-1.81165	0.00276499	0.00184858
9226	-0.258605	1.60792	-1.75553	0.000377341	0.000190034
9237	-0.959801	3.1241	-4.50902	2.90059e-06	7.39602e-07
9245	0.314635	1.94866	-1.7065	0.000249288	0.00011921
9252	-1.37439	2.44523	-2.2728	1.19813e-15	7.87382e-18
9268	1.09718	2.81589	-1.55268	0.00176995	0.00109725
9276	-0.0259514	2.41157	-2.46992	0.00274316	0.00182978
9277	-0.341111	2.30059	-2.89492	3.58763e-07	5.60347e-08
9279	-2.79515	1.94302	-3.52341	8.17722e-05	3.32821e-05
9280	0.586465	2.00014	-1.43165	1.17292e-07	1.33094e-08
9281	-3.96123	-1.31329	-2.34167	0.00342147	0.00235418
9283	-3.79976	-0.468958	-3.32651	0.000114421	4.95534e-05
9292	-0.770044	1.39081	-2.37023	0.000915931	0.000523275
9306	-2.00393	1.75001	-2.47996	0.00534188	0.00388501
9312	-3.47889	-1.08643	-1.93133	0.00647219	0.00482331
9314	-0.183549	2.18969	-2.45119	0.00111164	0.000656027
9315	-0.476755	2.55085	-3.02206	0.00607731	0.00451305
9323	-1.46792	1.57443	-2.22536	0.000513595	0.000268667
9332	-0.00945153	2.90756	-2.87486	0.000516724	0.000274392
9335	-3.4547	-0.7252	-3.10602	3.58553e-06	9.47239e-07
9339	-4.30067	-1.677	-2.36672	0.00131916	0.000794384
9342	-4.74163	-3.08742	-1.6821	0.00682128	0.00511335
9345	-2.38492	-4.53146	2.46819	8.34483e-05	3.43847e-05
9350	-3.47823	0.510054	-4.36056	0.00141186	0.000857939
9352	0.440921	1.57671	-1.52863	0.00952335	0.00748517
9356	-0.22103	1.70527	-2.89439	0.00307622	0.00207754
9358	0.658436	2.43621	-1.60293	0.00624007	0.00464486
9361	0.743473	-2.82336	3.4411	0.00141186	0.000857939
9364	-3.09289	0.490988	-2.96094	8.17722e-05	3.32821e-05
9385	-1.31795	1.02019	-2.00972	0.00177904	0.00111458
9407	-3.91649	1.52909	-5.10578	3.22361e-07	4.98547e-08
9413	0.330511	-1.89995	2.05052	0.00337305	0.00231643
9427	-2.56623	-0.345314	-1.58777	0.000496271	0.000257974
9432	0.846912	2.50178	-1.48269	0.00298899	0.00201274
9434	0.0672217	-4.48075	4.80819	9.55285e-09	6.529e-10
9436	-3.35044	-0.0160822	-1.83785	0.00465592	0.00332595
9439	1.77861	3.56933	-1.60896	0.000521154	0.000277644
9441	0.968171	3.15884	-1.6834	0.00221829	0.00143302
9442	1.30173	2.79206	-1.62501	0.0041255	0.00291403
9446	1.22168	2.67653	-1.55175	0.00111164	0.000656027
9447	1.12373	-2.72392	3.50527	6.90541e-11	1.8606e-12
9451	-1.63234	1.61033	-3.50298	2.90059e-06	7.39602e-07
9453	1.20493	-3.50453	4.08658	8.17722e-05	3.32821e-05
9454	1.98003	-0.837334	2.71956	5.67761e-05	2.21881e-05
9455	1.07685	-1.30392	1.86531	7.63713e-06	2.24346e-06
9457	-1.89932	2.74717	-4.18356	0.00501092	0.00363662
9458	1.22581	3.14596	-1.92015	0.000132903	5.81106e-05
9459	1.34241	3.00879	-1.44461	5.29682e-06	1.49564e-06
9474	1.38843	-2.98144	3.29744	0.00111164	0.00065348
9476	2.7053	-3.06408	5.12927	0.000172601	7.8682e-05
9483	0.847292	-3.7429	4.59019	2.28494e-05	7.80834e-06
9500	-3.57954	-2.29533	-1.45259	0.000294443	0.000144222
9502	-4.76723	-3.03233	-2.35411	3.4341e-08	2.82923e-09
9503	-4.21017	-2.15193	-1.68233	0.000196703	9.10478e-05
9511	3.5795	-0.425317	3.45043	5.29682e-06	1.49564e-06
9513	-3.97853	-1.33422	-2.68898	5.05214e-09	3.22053e-10
9514	-3.11204	-1.404	-1.61252	0.00341536	0.00234923
9521	-2.46556	0.958112	-3.01966	1.11153e-06	1.99419e-07
9524	1.43477	-3.41241	4.48909	3.39436e-10	1.14508e-11
9536	-2.22497	-3.54832	1.45118	0.00090016	0.000510912
9540	1.01629	-1.9102	3.19663	5.29682e-06	1.4826e-06
9542	0.808526	3.08449	-2.04994	0.000414041	0.00021278
9543	2.90144	-3.42286	4.74791	5.55813e-10	2.31335e-11
9544	0.0593375	-4.54705	3.59339	2.89408e-05	1.03464e-05
9549	1.3024	-4.94529	6.1174	3.06838e-13	4.03292e-15
9550	1.66437	-3.66336	5.29099	2.03812e-08	1.51799e-09
9555	0.0654091	-3.6249	2.80832	2.09393e-05	7.13266e-06
9564	2.0415	-2.62804	4.36413	0.00607731	0.00451305
9569	-4.48743	-3.36183	-1.42606	6.07285e-05	2.38923e-05
9570	-0.387824	3.47168	-2.94528	0.000377341	0.000190034
9574	-3.9561	-1.17586	-2.87946	1.10357e-05	3.45213e-06
9575	-3.75776	-1.63816	-1.82965	0.00512712	0.0037232
9596	-3.76626	-1.92022	-2.16253	0.000171757	7.8222e-05
9605	0.801139	-3.89542	4.02754	2.54355e-05	8.93724e-06
9608	1.52428	-3.28879	5.23236	0.000516724	0.000274392
9609	-0.183654	-2.57459	2.30588	1.80315e-05	5.98418e-06
9613	-1.11755	-3.72772	2.89467	6.46282e-08	6.61147e-09
9614	-2.42896	-4.33872	2.67853	1.50895e-05	4.8359e-06
9615	-0.17154	-4.31304	3.3239	1.02444e-05	3.16645e-06
9616	0.779566	-3.49866	4.33734	0.000756831	0.000421272
9620	3.78754	-1.7515	4.61218	3.22361e-07	4.98547e-08
9621	2.22493	-3.61219	5.03408	2.90059e-06	7.39602e-07
9624	2.72312	-0.808935	3.75627	2.03831e-05	6.91366e-06
9627	-4.06037	-0.524557	-3.66794	1.60814e-12	2.53638e-14
9637	-3.03633	1.9279	-4.6289	2.90059e-06	7.39602e-07
9647	2.20545	-2.28603	4.76918	3.90914e-11	9.50526e-13
9657	0.268352	2.69446	-2.06534	0.000158749	7.17414e-05
9659	0.325178	-4.08702	4.17224	3.48346e-11	7.09664e-13
9662	-3.21929	2.24645	-5.19584	5.67761e-05	2.21881e-05
9673	-3.46987	1.63416	-4.66103	1.94024e-07	2.32914e-08
9692	-0.107095	-2.68702	2.10713	0.00668273	0.0050051
9693	2.06568	-4.08147	5.76538	4.63884e-11	1.17876e-12
9695	-0.539877	2.15478	-3.05296	0.000188265	8.68536e-05
9708	-3.24619	-0.733862	-1.73512	0.000139399	6.16532e-05
9709	-3.85389	-1.7014	-2.13271	3.4983e-06	9.05037e-07
9733	0.195507	3.19521	-2.67235	3.8112e-07	5.9944e-08
9736	0.233211	-4.16085	3.76648	0.000139399	6.16532e-05
9744	0.54402	2.83134	-1.64288	0.0017886	0.00112214
9773	2.18591	-4.85167	6.63089	9.18934e-08	9.91721e-09
9774	0.371061	-4.07303	4.14855	3.56092e-10	1.45089e-11
9781	-3.12974	-1.58115	-1.63205	0.00567119	0.00416177
9789	-0.12064	1.95497	-2.3062	0.00039448	0.000201172
9791	-0.134157	-3.65295	3.23599	1.20527e-07	1.37028e-08
9812	-1.1004	-3.83787	2.64411	9.57427e-06	2.86704e-06
9818	-3.03888	1.90967	-4.28141	0.00607731	0.00451305
9824	-2.70984	2.13583	-4.81984	2.90059e-06	7.39602e-07
9825	-0.0186126	1.92823	-1.97103	9.16447e-05	3.79427e-05
9838	-3.80976	0.0894187	-3.90284	3.90914e-11	9.50526e-13
9845	-4.23212	-0.280265	-3.32355	3.09056e-06	7.94135e-07
9851	0.777215	2.8458	-1.92151	0.00373027	0.0025928
9852	-3.4265	2.61509	-4.0435	1.63602e-05	5.38649e-06
9855	-4.05072	-0.00412628	-4.04659	3.22361e-07	4.98547e-08
9867	-4.02072	2.07066	-5.09626	8.2825e-05	3.40009e-05
9873	-1.30156	1.89101	-2.85067	1.28787e-06	2.35286e-07
9877	1.00443	3.05965	-2.05522	0.00655174	0.00490555
9897	1.79234	-0.305795	2.12644	0.00501092	0.00363662
9909	-3.99216	-1.50097	-2.39029	4.21101e-06	1.12909e-06
9913	-2.51578	2.41774	-4.91464	3.4341e-08	3.32734e-09
9917	-0.728754	-4.06659	3.33784	1.81236e-10	5.47877e-12
9925	0.699092	3.3464	-2.65713	0.005382	0.00392361
9931	-0.226104	2.24245	-2.56676	3.69133e-05	1.35233e-05
9935	-1.29645	2.7265	-3.57296	1.81546e-05	6.03693e-06
9944	-0.797085	2.85059	-3.81694	0.00039448	0.000201172
9946	-2.73107	2.51943	-5.0012	3.22361e-07	4.98547e-08
9947	1.29583	3.26293	-2.26149	0.000216927	0.000101454
9948	0.885544	2.32546	-1.53409	0.00262793	0.00172931
9950	0.847158	2.3887	-2.05753	0.00111164	0.000656027
9952	0.438096	3.14225	-3.32304	0.000158749	7.17414e-05
9954	-1.31874	-3.72437	3.54898	5.89921e-06	1.69029e-06
9955	-1.38948	2.32725	-3.48704	0.00607731	0.00451305
9956	-1.49082	2.61241	-4.14722	0.00128847	0.000769977
9957	1.21548	3.60917	-2.55848	0.000756831	0.000421272
9959	1.18363	3.15413	-1.95322	0.00501092	0.00363662
9963	0.886961	3.45679	-2.56983	8.2825e-05	3.40009e-05
9973	2.40512	3.34959	-1.40386	0.00607731	0.00448418
9978	-3.61948	2.08189	-5.52382	8.2825e-05	3.40009e-05
9981	1.69841	3.09213	-1.44874	0.0041255	0.00291403
9983	-2.55675	0.309683	-3.02239	5.29682e-06	1.4792e-06
9989	0.73208	3.01413	-1.62534	0.00567119	0.00416177
9990	-1.76156	2.65452	-5.03131	1.81546e-05	6.03693e-06
10002	-4.44966	-1.80691	-2.73334	3.22361e-07	4.98547e-08
10004	3.68515	-2.40017	5.76677	2.90059e-06	7.39602e-07
10006	3.21952	-3.71804	6.65837	2.0055e-17	7.02913e-20
10008	2.73022	-1.02778	3.09645	0.000873739	0.000495534
10014	-3.84045	-1.96909	-2.21716	0.00158904	0.000977097
10047	0.255175	-4.13578	4.6815	1.58405e-05	5.17722e-06
10083	-3.6022	1.82847	-5.03647	0.00753991	0.00576106
10088	-4.5267	-2.52573	-2.076	0.000561754	0.000300628
10089	-3.35235	1.25831	-3.57859	0.000915931	0.000523275
10093	-1.65439	-3.7025	1.63114	3.93185e-06	1.04735e-06
10114	-3.15877	1.79483	-4.59313	3.1006e-05	1.11119e-05
10125	-0.272988	-4.00558	4.2623	2.14072e-06	4.17358e-07
10149	-4.35932	-2.87541	-1.40802	2.53697e-05	8.74923e-06
10195	-4.09895	1.25978	-3.48642	4.18427e-05	1.56463e-05
10199	-0.914559	-3.97201	3.05196	1.58405e-05	5.17722e-06
10203	-4.22488	-2.96622	-1.4064	0.00111955	0.000662413
10209	-4.91801	-3.40989	-2.08733	7.89252e-07	1.34856e-07
10212	-3.04226	2.24884	-4.80787	0.00732665	0.00555959
10214	-3.62662	-0.0582341	-2.74007	0.00128847	0.000769977
10235	1.25424	-4.67756	5.57299	3.59302e-09	2.20382e-10
10237	2.21264	-4.36108	6.82557	2.90059e-06	7.39602e-07
10267	-1.06847	2.64119	-2.94083	3.22361e-07	4.98547e-08
10274	-4.79238	-1.61766	-2.76588	3.22361e-07	4.98547e-08
10277	-2.29648	0.345359	-2.09951	0.000756831	0.000421272
10278	-2.45116	-0.462666	-2.07078	0.000833279	0.000466563
10294	-3.50865	0.458294	-3.34364	2.03831e-05	6.9298e-06
10304	-3.18343	0.0252466	-2.78269	0.000171757	7.8222e-05
10330	-2.43166	1.77655	-3.97777	2.50264e-07	3.06332e-08
10335	-3.84048	-1.86878	-1.63714	0.00607731	0.00450077
10341	-3.61308	-1.15023	-2.62716	0.000377341	0.000190034
10343	-4.16522	0.720115	-4.41562	5.67761e-05	2.21881e-05
10366	-2.16725	2.75203	-3.87292	1.58405e-05	5.17722e-06
10375	-2.92657	-0.299706	-2.71322	0.00337305	0.00231643
10401	-0.934147	-3.2033	1.42301	0.0062852	0.0046812
10405	-4.29004	-1.53227	-1.69348	0.00131916	0.000794384
10421	-1.73436	1.47637	-3.35543	0.000756831	0.000421272
10422	-1.0373	2.6699	-2.66687	5.29682e-06	1.4792e-06
10427	-2.61875	1.67511	-4.29386	2.90059e-06	7.39602e-07
10434	-4.16058	-2.48884	-1.76084	0.00010758	4.53179e-05
10440	-0.788423	1.09424	-1.70214	5.29682e-06	1.4792e-06
10446	-0.291687	2.88163	-3.02106	2.90059e-06	7.39602e-07
10453	-3.13226	1.15312	-3.99012	1.61108e-05	5.2938e-06
10462	-1.63111	0.840178	-1.91707	0.00331095	0.00224768
10469	-4.59406	-1.82942	-1.88823	0.000513595	0.000268667
10472	-0.765373	1.72928	-2.60477	1.52657e-05	4.9091e-06
10484	3.0413	1.11467	1.57947	0.000513595	0.000268667
10493	1.71337	-2.99037	5.33055	5.97221e-07	9.97093e-08
10495	-2.46989	-4.86301	2.79114	1.18014e-05	3.70198e-06
10497	0.656199	2.35745	-1.6615	0.00449905	0.00321093
10501	0.728186	2.86491	-2.03108	0.001127	0.000667562
10503	1.76651	3.13691	-1.43822	5.29682e-06	1.4792e-06
10504	0.135011	2.85157	-2.93877	0.000677416	0.00037128
10506	0.967852	2.68473	-1.9702	0.000317109	0.000156664
10507	-0.324644	2.92493	-3.24957	0.000513595	0.000268667
10508	-1.90154	1.27536	-2.97917	2.57396e-05	9.10047e-06
10509	-0.974075	1.94489	-1.66125	0.00138435	0.000835766
10516	2.85013	-0.468494	2.77748	5.14414e-09	3.31298e-10
10524	1.21425	2.44902	-1.40426	0.00221829	0.00143302
10526	1.75398	3.37149	-1.78647	0.00607731	0.00451305
10544	-4.60808	-2.53201	-1.86281	5.00857e-06	1.36707e-06
10545	-2.77086	1.53137	-4.52953	5.29682e-06	1.49564e-06
10547	1.46173	-1.18195	2.87945	9.63277e-06	2.95841e-06
10551	-2.5823	2.7892	-5.37151	0.000873739	0.000495534
10553	-0.637099	2.31278	-2.64713	0.00732665	0.00555959
10556	0.579513	1.83867	-1.73516	0.00490324	0.00353377
10566	-2.25119	2.3232	-3.65923	3.14804e-07	3.99281e-08
10567	0.194928	2.25429	-1.80012	0.000171757	7.8222e-05
10570	-1.75508	-3.90854	1.79494	4.73761e-07	7.54489e-08
10571	-0.852429	-4.09493	3.32264	3.4341e-08	3.32734e-09
10583	-4.45265	-2.57088	-1.79424	0.00100243	0.000577964
10585	-0.728963	-4.05956	2.04285	0.00187271	0.0011827
10586	-1.08594	-4.17483	2.87607	1.60824e-07	1.8848e-08
10587	-1.99755	-4.9807	2.37913	1.4345e-06	2.64352e-07
10589	-0.374364	-3.95411	3.57401	1.54946e-07	1.81251e-08
10592	-3.75331	-0.711406	-2.70272	0.00221829	0.00143261
10598	-0.746667	1.79301	-2.5403	0.00111164	0.000656027
10599	-3.82868	-0.909705	-1.94115	3.27798e-07	5.08391e-08
10610	-1.88438	-4.09053	2.31744	9.63277e-06	2.93044e-06
10613	-3.40035	-1.76227	-1.45433	3.65695e-05	1.32659e-05
10614	-3.45579	-2.4303	-1.49393	0.000710338	0.000392437
10615	-3.45201	0.266233	-2.88803	0.000335286	0.000167312
10616	-2.01662	0.297076	-2.10382	0.00307622	0.00207754
10624	-0.167819	2.73084	-3.14155	1.05202e-12	1.61317e-14
10630	-3.20322	-1.11743	-1.50239	0.00891384	0.006969
10633	1.06669	-2.75038	3.57585	5.97221e-07	9.97093e-08
10636	-4.31816	-1.82988	-2.51597	5.29682e-06	1.4792e-06
10647	-0.0797262	-3.47047	4.18236	2.19393e-14	1.87433e-16
10648	0.736554	-4.21538	4.7924	3.22361e-07	4.98547e-08
10649	-0.0963706	-4.2857	4.1435	1.17292e-07	1.33094e-08
10650	0.796018	-3.18327	4.14325	0.00039448	0.000201172
10653	0.0294226	3.11967	-3.09025	2.90059e-06	7.39602e-07
10655	1.74717	-3.97224	5.41214	3.59302e-09	2.20382e-10
10656	3.75735	-3.98965	7.68118	3.50254e-11	7.44241e-13
10657	-1.05866	-4.08	2.90707	1.05303e-08	7.24318e-10
10658	-0.669644	-3.39651	2.04544	6.39733e-07	1.07627e-07
10660	0.488449	-2.65958	2.89557	1.27279e-05	4.02608e-06
10663	0.722503	-4.56125	5.62592	2.90059e-06	7.39602e-07
10664	-3.45526	-0.3863	-2.63654	0.000621024	0.000337516
10670	-0.418112	-3.36829	2.64984	0.00039448	0.000200037
10676	-3.71828	-1.0388	-2.27197	3.16063e-05	1.13591e-05
10713	1.04487	-4.84317	5.9254	3.22361e-07	4.98547e-08
10720	-4.27565	-2.49915	-1.86342	0.000207177	9.61681e-05
10722	0.433756	3.0104	-3.11877	3.69133e-05	1.35233e-05
10729	0.0894035	-4.75152	4.787	3.27793e-05	1.18623e-05
10730	-3.39139	-0.0977488	-3.57495	2.3407e-06	4.62501e-07
10740	-2.39433	0.923729	-2.54372	0.00337305	0.00231643
10742	-3.31209	0.203089	-3.55091	0.000677416	0.00037128
10747	3.09866	-2.48721	3.3968	3.77572e-05	1.3982e-05
10751	1.45724	3.34299	-1.40422	0.000472118	0.000244695
10753	-2.63704	2.58202	-4.87597	0.00274316	0.00182978
10760	1.29514	2.31328	-2.0632	0.00127271	0.000757768
10765	-2.76775	0.724183	-3.05373	1.58405e-05	5.17722e-06
10768	-4.23307	-2.4551	-1.94981	0.000216927	0.000101454
10771	-2.70971	-1.0517	-1.49656	0.00567119	0.00416163
10774	0.109371	2.97166	-2.67299	0.00732665	0.00555959
10781	-0.900487	2.35997	-3.04526	5.67761e-05	2.21881e-05
10788	-3.50178	-1.85391	-1.65736	0.00337305	0.00231643
10794	-3.6952	2.66502	-5.81428	0.000223184	0.000106239
10798	-2.20787	0.843053	-2.3349	0.000135937	6.00377e-05
10801	-3.49478	2.932	-5.88717	2.90059e-06	7.39602e-07
10803	0.445413	-3.67348	4.428	1.28882e-07	1.47656e-08
10805	-1.38666	-4.26208	2.63188	3.4297e-08	2.64459e-09
10806	-2.4906	-4.18105	1.6925	0.000293435	0.000142315
10813	-0.876031	-4.53298	1.77518	5.56845e-05	2.14078e-05
10814	0.172076	-4.33963	5.00397	1.82069e-06	3.48983e-07
10825	0.782963	-3.32366	3.80851	3.54305e-06	9.1739e-07
10828	0.129834	2.19009	-2.21261	4.89561e-05	1.85958e-05
10837	-3.79913	1.09095	-4.61563	2.90059e-06	7.39602e-07
10841	-4.30841	-2.69342	-1.64477	0.00934782	0.00733082
10849	3.93157	-2.37691	6.42919	2.90059e-06	7.39602e-07
10851	-0.289086	-4.84295	4.69699	0.000414041	0.00021278
10852	3.39438	-0.534938	3.79854	6.90541e-11	1.8606e-12
10856	-1.92729	-3.46774	2.18037	0.000223184	0.000106192
10866	-3.7756	2.2628	-5.27198	3.22361e-07	4.98547e-08
10885	-0.168388	-3.92111	3.75272	1.32493e-10	3.8021e-12
10890	-2.77679	-0.809838	-1.82425	0.0098072	0.00771256
10891	3.14354	-2.94856	6.28979	3.56092e-10	1.45089e-11
10892	-1.02366	-4.31433	3.63028	3.62767e-18	8.34514e-21
10893	-0.880337	-2.97352	2.31937	0.000873739	0.000495534
10894	0.113962	-3.71002	3.60309	1.10562e-06	1.93756e-07
10929	-0.244577	2.90161	-2.19825	0.000611015	0.000328532
10933	0.341055	-4.35742	4.86798	3.31165e-09	1.74107e-10
10934	0.426943	-3.47875	3.93008	1.17292e-07	1.33094e-08
10939	-3.3632	-1.64479	-1.50924	6.23842e-05	2.45847e-05
10952	1.59166	-0.915558	2.81555	7.38056e-05	2.96865e-05
10974	2.45436	-0.243634	2.26468	0.000114421	4.95534e-05
10978	-0.361855	-2.83791	2.45685	0.00171313	0.00105978
10979	-2.71783	-4.83401	2.5025	2.90059e-06	5.96796e-07
10985	-3.30498	-0.320691	-2.90755	0.000273168	0.00013215
11008	2.63325	-2.3464	4.76985	2.0977e-06	4.07134e-07
11013	-4.14451	-1.07863	-3.10506	2.90059e-06	7.39602e-07
11014	-3.7618	-1.95097	-2.1056	0.00871757	0.00681174
11018	-2.12604	0.0110588	-2.1955	0.00177904	0.00111458
11019	1.0673	-2.90136	3.8269	1.15134e-06	2.07821e-07
11022	-4.07954	0.0407184	-4.21265	4.89561e-05	1.85958e-05
11030	-4.03348	-1.75802	-2.00463	1.11153e-06	1.99419e-07
11031	2.35273	-2.27291	5.1437	2.1181e-11	4.17588e-13
11035	2.71191	-4.17332	6.69091	3.4341e-08	3.32734e-09
11040	-0.357376	2.83206	-3.41145	1.82069e-06	3.48983e-07
11042	1.82126	2.9687	-1.43283	0.00906483	0.00710492
11044	-0.0699612	2.78643	-3.02293	8.2825e-05	3.40009e-05
11046	-2.42836	-4.42434	1.53502	3.58553e-06	9.45816e-07
11057	-0.131016	-3.73549	2.51359	6.20597e-08	6.28074e-09
11066	2.00094	-1.65654	2.46278	7.95073e-05	3.2099e-05
11067	0.63809	3.11631	-2.40674	6.94962e-06	2.01562e-06
[truncated: 1,604 more rows]

## Sheet: 026
dmr_id	median1	median2	median_change	padj	pval
9	-0.328325	-4.58482	4.22831	0.000468019	0.000107735
19	-0.0786303	-2.97862	2.77911	0.000258402	4.38009e-05
28	-1.29482	-3.69187	2.54972	0.00219013	0.000754148
42	-0.17207	-4.41274	4.50016	0.000800003	0.000206398
55	2.10426	-0.0839644	1.72692	0.00499757	0.00216188
61	2.45515	-1.20262	4.04841	0.00332143	0.00129282
104	-3.22587	-0.0608408	-2.81108	0.00127666	0.000369831
106	-1.72214	-4.40099	2.80366	3.12322e-09	2.33424e-11
110	-0.164319	-4.66722	3.73691	0.000134767	1.95e-05
124	-1.38057	-3.16885	2.04468	0.00140771	0.000430942
133	-3.02584	2.25233	-4.61456	0.00219222	0.000773994
135	-4.00365	1.03038	-4.86808	2.36914e-05	1.70691e-06
136	-3.54315	2.12545	-5.66706	0.000297466	5.16676e-05
143	0.479971	-3.23931	3.79541	0.00140771	0.000430942
146	2.49977	-2.8605	5.50461	0.000808016	0.000215471
147	0.290499	-3.51504	3.3594	6.13876e-07	1.52322e-08
150	-1.17713	-4.3661	2.8436	6.6992e-05	6.9896e-06
152	-1.25357	-3.90386	3.02075	0.00161158	0.000515996
164	-2.24779	-4.31576	2.09934	0.00230376	0.000818883
166	-4.23728	-0.63751	-3.69993	3.12585e-05	2.71935e-06
168	0.0324838	-3.04037	3.0062	3.54911e-05	3.21489e-06
179	1.27497	-2.04889	3.63142	0.000122412	1.71999e-05
187	0.766519	2.33303	-1.48413	0.000957414	0.000258745
199	-0.85503	-3.55318	2.77727	1.17778e-06	3.45061e-08
233	-3.80783	-2.49951	-1.64094	0.00861004	0.00423117
241	-3.81622	-2.19128	-1.85417	0.00673582	0.00311318
293	0.118761	-4.81212	4.82742	3.12585e-05	2.71935e-06
315	-0.413009	-2.30028	1.71776	0.000468019	0.000106711
344	-0.41123	-3.06939	2.51068	0.00332141	0.00125906
360	0.629952	-3.16164	3.57977	0.00304997	0.00113519
362	1.21548	-1.2599	2.66502	3.12585e-05	2.71935e-06
363	-3.13726	0.388223	-3.07544	0.00140771	0.000430942
381	1.78351	-2.34498	4.33768	3.12585e-05	2.71935e-06
386	-3.81014	0.909536	-4.80708	0.000468019	0.000107735
405	3.89343	-1.46271	5.35614	2.36914e-05	1.70691e-06
412	0.535454	-3.53173	3.32576	0.00184816	0.000601687
416	2.61779	-1.63496	2.24048	0.00388284	0.00153921
418	2.14897	-1.4907	3.63968	0.000122412	1.71999e-05
419	0.705365	-3.78523	4.39527	0.000188806	2.85908e-05
420	-1.64583	-4.87849	3.30271	6.86371e-08	9.84927e-10
431	3.41119	-0.946169	3.85389	3.42771e-06	1.54992e-07
434	0.601179	-3.27532	4.06767	1.43403e-06	4.80152e-08
436	0.629315	2.03093	-2.0545	0.00861004	0.00423117
437	0.931187	3.44972	-2.34003	2.56656e-09	1.84148e-11
438	0.106207	-2.30538	2.36459	7.49771e-11	2.46561e-13
439	-0.214001	-3.59331	3.38979	2.30698e-05	1.60695e-06
440	-0.910658	-4.61091	3.45629	4.20494e-07	8.29674e-09
454	3.26717	1.49641	1.61351	0.00929455	0.00474036
468	-0.904243	-3.26648	1.98801	8.79131e-06	5.15126e-07
472	1.81897	-0.165758	2.205	0.00400011	0.00161679
475	1.82945	-3.1173	4.54174	7.92816e-05	8.53255e-06
478	-0.827678	-3.07576	2.39729	5.2762e-07	1.26187e-08
488	-2.34942	-4.24449	1.88568	0.000371184	6.82931e-05
514	2.41043	-1.18047	3.38	0.00021191	3.43997e-05
524	-1.71538	-4.28787	2.54947	0.00683823	0.00323206
531	-1.27778	1.39694	-2.68194	0.00301494	0.00110503
550	-0.153558	-4.00245	3.65881	0.00740587	0.00356234
557	-3.23361	0.526303	-3.6741	0.00127666	0.000369831
563	-0.246922	2.02415	-2.2013	0.00929455	0.00474036
568	-4.48501	-3.10419	-1.40348	0.00495486	0.00212305
575	-2.30698	1.17177	-3.34869	0.00673582	0.00311318
577	1.71428	-3.15392	4.44934	0.00161158	0.000515996
599	-0.292038	3.2876	-3.79299	0.00400011	0.00161679
602	-4.56325	-3.01002	-1.45414	0.00219222	0.000768964
614	-4.33992	-1.89218	-2.39137	0.00332141	0.00125906
620	1.05952	-3.57342	4.70192	0.00219222	0.000773994
628	-4.12748	-1.98712	-2.09398	0.00683823	0.00323206
630	-4.40976	0.29483	-4.73006	0.000122412	1.71999e-05
647	-0.248096	-3.30795	2.56131	0.00304997	0.00113519
665	3.5112	-0.519638	3.77274	0.000468019	0.000107735
669	3.07413	0.828653	2.4569	0.000863868	0.000231398
675	2.8317	0.269428	2.73129	0.00140771	0.000430942
707	2.65826	-1.89771	4.11068	0.00332143	0.00129282
708	2.55218	-2.71885	5.03969	0.000468019	0.000107735
709	-2.89891	1.06714	-3.45793	0.000509791	0.000120399
713	-0.505148	-4.26226	3.2038	0.00230376	0.000818883
736	-3.98981	-0.293145	-3.26508	0.00184816	0.000601687
761	3.37397	-1.97939	5.69219	1.85434e-10	8.86977e-13
814	-4.53019	-3.12049	-1.43173	0.00693386	0.00329177
823	0.772648	-1.26053	2.10453	0.00616856	0.00278461
830	-2.64747	2.21866	-4.10974	7.63318e-06	4.26728e-07
839	-2.10974	2.15021	-4.16826	0.000273803	4.67389e-05
840	-0.268823	-4.5982	4.46353	4.64754e-05	4.45997e-06
844	-0.596795	1.72255	-2.02427	0.000756366	0.000190165
878	-3.70009	1.16302	-4.82912	3.12585e-05	2.71935e-06
887	2.52662	0.014654	2.28509	0.00161158	0.000515996
917	-1.08921	-3.747	2.41798	0.00495486	0.00212414
926	-3.67827	1.15822	-4.33658	0.000468019	0.000107735
958	-4.1447	0.402539	-4.64654	4.36414e-09	3.78356e-11
971	3.50763	1.46474	1.93802	0.00683823	0.00323206
972	2.34871	0.853625	1.4583	0.00861004	0.00423166
1025	-4.29452	-1.31372	-3.16754	1.68445e-06	6.65668e-08
1064	-4.25435	-1.84728	-2.02215	0.00906757	0.00452972
1074	-1.08576	3.44391	-4.22379	0.000808016	0.000215471
1078	0.112703	2.03031	-1.97807	0.00740587	0.00356234
1084	-2.34612	1.24871	-3.5469	0.00332143	0.00129282
1091	-4.52153	-1.02145	-3.4237	0.000139331	2.03269e-05
1099	-4.16772	0.726261	-4.63021	3.44828e-07	6.39142e-09
1100	-4.56744	-0.261006	-3.98939	0.00219013	0.000754148
1101	-3.95225	2.54927	-6.39825	2.22607e-08	2.46232e-10
1118	-0.973983	1.29028	-2.71902	0.00683823	0.00323206
1132	-4.38106	0.595815	-4.77538	1.00878e-10	3.9205e-13
1153	-4.79538	-2.31534	-2.48004	0.000132377	1.90354e-05
1191	-1.86725	2.15043	-4.01768	0.000122412	1.71999e-05
1197	-2.74807	1.33409	-3.92813	3.12585e-05	2.71935e-06
1215	-2.31837	1.28517	-3.09289	7.59684e-05	8.10783e-06
1224	3.84215	2.22664	2.11552	0.00219222	0.000773994
1238	0.550222	-4.51574	3.3772	0.00219222	0.000768964
1281	4.55614	-3.3977	7.95384	0.00021191	3.43997e-05
1289	3.15673	1.64727	1.64193	0.000468019	0.000107735
1302	-1.83235	-4.25602	2.23472	0.00683823	0.00323206
1342	-1.85062	-3.44896	1.73171	0.00929455	0.00474036
1350	2.72874	0.605389	2.13291	0.000404427	7.56864e-05
1394	-1.19048	3.44034	-4.13838	0.00400011	0.00161679
1414	4.02149	2.45621	1.60676	0.00140771	0.000430942
1429	-0.371288	2.0458	-2.68391	0.00499757	0.00216188
1447	-3.1647	0.679431	-4.17421	0.00332143	0.00129282
1448	-2.766	-0.583582	-2.79506	0.00101813	0.000280329
1498	3.83985	-1.02823	4.44043	0.00261941	0.000943613
1513	-0.213197	-3.38895	3.06013	0.00115432	0.000326797
1523	-4.64038	-2.28923	-2.27824	0.00304997	0.00113519
1531	-2.7943	-0.291807	-2.30187	0.00161158	0.000515996
1554	-2.96491	-1.49692	-1.63384	0.00145153	0.000446524
1585	-0.402207	-3.50694	3.12408	6.72812e-09	6.03419e-11
1713	-3.9845	-1.29113	-2.44157	0.00357908	0.00140702
1737	3.64248	2.22797	1.51729	0.000997935	0.000272679
1740	2.22134	-1.43639	3.54348	0.000210318	3.3324e-05
1772	3.3191	-1.96965	4.59947	0.000371184	6.87994e-05
1800	2.16269	-2.49598	4.20782	0.00929455	0.00474036
1810	-0.640038	-4.44538	2.71653	0.00230376	0.000818883
1815	2.41062	-1.30891	3.71953	0.000800003	0.000206398
1829	-1.71229	-4.25149	2.45049	0.00267188	0.00096731
1830	0.513611	-3.78964	4.30583	8.11803e-06	4.65967e-07
1831	1.11167	-3.56725	4.18337	4.13198e-06	1.90232e-07
1859	-5.07514	-1.68264	-3.56772	5.33502e-05	5.43869e-06
1861	3.14992	0.0102212	3.15677	0.00140771	0.000430942
1868	-4.25166	-2.26042	-1.62187	0.000468019	9.53561e-05
1895	-4.13282	-2.7045	-1.4727	0.00481175	0.00199581
1937	2.78718	-3.04192	5.81931	0.000468019	0.000107735
1938	-2.38823	-4.31343	1.57722	0.000193237	2.93466e-05
1941	0.888022	-4.63251	5.54588	0.000122412	1.71999e-05
1942	0.744822	-4.2079	4.91059	6.45888e-07	1.64975e-08
1957	-1.34593	-4.45776	2.75584	0.00219222	0.000773994
1960	-0.0729355	-3.83456	3.58565	7.59716e-07	2.06679e-08
1966	-1.46873	2.71348	-4.00156	0.000468019	0.000107735
1984	-0.589203	-3.10757	2.51837	0.00533855	0.00236365
2006	-3.70061	1.53053	-5.13937	0.000468019	0.000107735
2024	1.14997	-1.17828	2.62424	0.000593449	0.000143883
2029	-4.20694	-2.85874	-1.45793	0.00261941	0.000943613
2031	0.0227156	-3.43084	3.2725	0.000877075	0.00023546
2032	-4.49704	-2.80517	-1.60366	0.00107938	0.000297837
2039	2.72565	-0.143089	3.52388	1.35299e-05	8.53456e-07
2044	2.10112	-3.88224	5.58676	7.59716e-07	2.06679e-08
2046	3.52105	-3.99741	7.51846	0.000468019	0.000107735
2047	1.62854	-3.36164	5.09135	0.000468019	0.000107735
2048	-0.124872	-3.30164	3.31285	0.000207913	3.26322e-05
2058	0.563194	-3.82473	4.23069	1.29145e-05	8.06917e-07
2067	-3.9434	0.966802	-4.87033	0.000468019	0.000107735
2068	-4.60797	-2.80585	-1.80438	0.00210852	0.000701591
2069	-4.49762	-2.6286	-1.82895	0.000204874	3.12364e-05
2080	2.47955	-0.0620393	1.93611	0.00637737	0.00290175
2081	0.589761	-1.08172	1.72806	0.000122412	1.63971e-05
2082	0.806112	-1.30286	1.85077	0.00332141	0.00125906
2086	-1.82565	-5.05513	3.13224	1.23967e-06	3.66898e-08
2097	-5.09845	-0.691739	-4.21751	9.69938e-10	5.79933e-12
2099	-0.788803	-3.68553	2.84555	0.000997935	0.000272679
2101	0.99295	-3.68679	4.31013	0.000808016	0.000215471
2119	0.546205	-1.90807	2.77307	0.00131064	0.000382025
2127	-1.03174	3.23164	-4.10234	0.000371184	6.87994e-05
2133	0.471321	-4.64901	5.01498	5.33502e-05	5.43869e-06
2141	3.02923	-2.4319	5.55166	0.000468019	0.000107735
2156	-4.65359	0.58149	-5.05777	0.00613994	0.00275334
2162	-4.24749	-0.199856	-3.31963	0.00210852	0.000701591
2166	0.0227542	-4.58179	4.14537	0.000657446	0.000161757
2167	0.661933	-3.25809	4.38483	0.000122412	1.71999e-05
2168	-1.13979	-3.14781	2.8948	0.000509791	0.000119069
2170	2.58667	-0.708832	3.3977	0.00021191	3.43997e-05
2171	1.53162	-0.939165	2.58651	0.000207913	3.26322e-05
2185	-0.607981	-4.03503	3.25834	0.000240181	3.94199e-05
2193	3.57425	1.95393	1.62285	5.33502e-05	5.43869e-06
2199	3.43916	2.33159	1.68802	0.00481175	0.00204697
2228	-4.38839	-1.92809	-2.33601	0.00481175	0.00204697
2239	-4.66637	-1.04735	-3.64951	0.000468019	0.000107735
2265	-2.33377	1.50115	-4.00877	0.00404941	0.00165608
2269	-4.16827	-2.0813	-1.45654	0.00517332	0.00227035
2276	0.332531	-3.09864	3.43118	0.00161158	0.000515996
2295	2.39559	-1.29286	3.51863	0.00673582	0.00311318
2316	2.43663	-1.46302	4.05983	0.000468019	0.000107735
2334	-0.570662	-2.8756	2.52357	1.6251e-05	1.06192e-06
2364	-1.6971	-4.41437	2.47975	0.001375	0.000403661
2365	2.68647	-2.64028	5.31344	0.000122412	1.71999e-05
2366	3.81216	-2.21145	5.9625	0.000808016	0.000215471
2368	3.09051	-1.94574	5.03786	9.69938e-10	5.79933e-12
2369	1.56229	-3.60794	4.97461	0.000122412	1.71999e-05
2370	2.99229	-3.02125	6.01354	0.000468019	0.000107735
2386	-4.7666	-2.17327	-2.59994	3.12585e-05	2.71935e-06
2407	0.326117	-1.75784	2.62043	0.000958547	0.000261057
2409	0.403742	-2.79014	3.05583	0.00219013	0.000754148
2422	-4.52677	-1.2968	-3.41088	1.02029e-05	6.16138e-07
2438	-4.75094	-2.76872	-1.86176	0.00219013	0.000754148
2442	-4.78275	-2.87049	-1.79162	9.76737e-05	1.1242e-05
2443	2.94628	-0.365256	3.29395	0.00115432	0.000326797
2481	-3.89464	0.231761	-3.61132	0.00332143	0.00129282
2483	-4.53421	-0.755946	-3.36469	0.000122412	1.71999e-05
2494	-3.74344	-1.81446	-2.09743	0.00180313	0.000581099
2497	-2.43417	1.92314	-4.16828	0.00140771	0.000430942
2503	-5.07906	-2.76991	-2.14143	0.00143628	0.000440976
2521	4.08423	-0.557695	4.3286	0.000468019	0.000107735
2571	2.26096	0.219736	2.27663	0.00261941	0.000943613
2572	3.37194	0.973998	2.20804	0.00161158	0.000499717
2583	-3.22031	1.46469	-4.42014	0.00140771	0.000430942
2586	-4.61432	-2.45443	-2.09205	0.000429564	8.19318e-05
2589	-3.4932	-2.18215	-1.75642	0.00613994	0.00275334
2615	-0.512555	-4.55428	3.89763	0.000371184	6.87994e-05
2628	-5.28824	-3.01725	-2.12632	0.000132377	1.90354e-05
2631	1.977	-3.53075	5.52	3.12585e-05	2.71935e-06
2649	3.60183	0.801426	2.80041	0.000526837	0.000126787
2660	-3.24361	2.06378	-4.93931	2.36914e-05	1.70691e-06
2683	-4.34953	-2.74204	-1.75073	0.00210852	0.000701591
2688	-0.662758	1.47939	-2.27175	0.00683823	0.00323206
2695	3.71813	0.743523	2.34126	0.00481175	0.00204697
2701	-4.11292	-1.14171	-2.97121	0.000371184	6.87994e-05
2704	-4.09878	-1.42894	-2.69158	0.00140771	0.000430942
2735	3.77532	1.02544	2.682	2.36914e-05	1.70691e-06
2739	-3.39847	1.53212	-5.15858	9.52483e-05	1.08774e-05
2769	-1.09879	-4.2179	2.63086	9.23191e-05	1.01841e-05
2787	-4.18317	-2.25102	-2.28378	2.36914e-05	1.70269e-06
2793	1.61789	-1.82104	3.68151	0.000468019	9.83191e-05
2809	-4.34211	-2.56662	-1.64676	0.000188806	2.86172e-05
2810	-4.59319	-2.22155	-2.33465	0.000371184	6.66023e-05
2859	-3.82756	-1.06666	-2.49357	0.0026895	0.000976354
2865	-2.49496	-4.3096	1.63697	0.00651144	0.00296859
2878	-2.11084	1.08569	-2.65606	0.00210852	0.000701591
2883	-2.88682	1.01761	-3.59476	9.52483e-05	1.07376e-05
2886	-1.24907	-4.54427	3.35642	0.000297466	5.16676e-05
2908	-4.14347	1.29297	-4.27482	0.000404427	7.56864e-05
2918	3.56203	0.810172	2.47713	7.24409e-05	7.60142e-06
2936	-2.11261	-4.77522	2.54136	2.41787e-05	1.74925e-06
2949	-4.63233	-2.88827	-1.5013	0.00533855	0.00236365
2953	2.16801	-2.40937	4.7713	5.87616e-06	2.86342e-07
2982	2.86411	0.122615	2.38146	0.0090471	0.00450868
2983	3.34127	-1.67809	4.26496	0.00721439	0.00342711
2997	-0.183405	-2.85487	2.60154	0.000207913	3.20192e-05
3010	1.06272	-3.56493	4.06267	0.000455378	8.7536e-05
3014	2.09093	-1.80905	3.96145	0.000126474	1.79219e-05
3015	2.71502	-1.46248	3.92339	0.000468019	0.000107735
3039	2.7603	-4.20792	6.24644	0.000431636	8.25852e-05
3097	2.73859	-0.699728	3.18414	0.00219013	0.000754148
3100	-4.25641	-0.830627	-3.41792	0.00517332	0.00227038
3103	3.68273	-0.968704	4.57209	0.000468019	0.000107735
3107	-3.90047	1.99852	-5.78121	0.000468019	0.000107735
3116	-1.20789	-4.12962	2.79568	0.000112873	1.343e-05
3121	-3.23203	-0.268343	-2.59296	0.000512944	0.000122371
3149	0.708103	-4.16745	3.73227	0.00388284	0.00153921
3159	-4.27752	-1.77618	-2.50134	0.00115432	0.000326797
3195	2.86261	-1.99483	4.85744	0.000122412	1.71999e-05
3197	0.415593	-0.658677	1.90851	0.00740587	0.00354355
3209	-0.826629	-5.58466	4.70428	0.00219013	0.000754148
3210	1.20758	-4.37601	3.9029	0.00499757	0.00216188
3223	-1.08901	-4.11692	2.93111	8.8541e-06	5.24099e-07
3235	1.86488	-2.68723	4.08042	0.000800003	0.000206398
3241	-3.95901	-1.88044	-1.98394	0.000432196	8.29507e-05
3266	-2.83611	-0.406315	-2.81757	0.00257726	0.000919953
3271	-3.79357	0.86247	-4.65604	0.00184816	0.000601687
3274	-3.74508	1.57049	-5.37556	0.000726396	0.000182196
3279	1.10668	-3.65617	4.67529	0.000726396	0.000182196
3296	-0.120905	-2.78831	2.74253	0.00140771	0.000430942
3300	2.60934	-3.21581	5.43027	3.66603e-06	1.67684e-07
3303	0.924958	-4.10827	3.81815	0.00517332	0.00227038
3344	-4.71844	-2.75868	-1.77322	0.00263895	0.000951444
3345	-2.36285	-4.2331	1.73472	0.00301494	0.00110503
3369	-0.273229	-4.04434	3.79104	3.12585e-05	2.71935e-06
3370	1.94706	-2.12903	4.59745	9.52483e-05	1.08774e-05
3383	1.68843	-2.25952	3.73338	0.00929455	0.00474036
3391	1.03108	-3.14599	3.35481	0.00343597	0.00134871
3410	-3.40473	-0.845883	-2.84312	0.00904872	0.00451489
3413	0.502922	-3.27551	3.06565	0.00444451	0.00182564
3420	-1.03661	2.59951	-3.56988	0.00295647	0.00108094
3422	0.862951	-0.349257	1.67514	0.000122412	1.71999e-05
3432	2.6405	0.961844	1.47222	0.00517332	0.00227038
3455	-4.69706	-0.846838	-3.80879	4.39085e-05	4.10862e-06
3459	1.99672	-1.08609	2.98694	0.00533855	0.00236365
3486	-3.44475	0.0539798	-3.90297	0.00140771	0.000430942
3499	-2.37216	1.06582	-3.96062	0.00210852	0.000701591
3538	-3.98433	-1.67978	-2.53942	0.00459973	0.0018949
3558	2.64723	-0.377624	2.7122	0.00516828	0.00223882
3559	3.95849	1.67124	2.19918	0.00219013	0.000754148
3586	-3.70944	-1.81927	-1.87851	0.00219013	0.000754268
3614	3.1267	-0.176768	3.39542	0.00219013	0.000754148
3629	1.08249	-1.86342	2.8999	7.63318e-06	4.26728e-07
3642	-3.77978	-0.77835	-3.08373	0.000371184	6.87994e-05
3643	3.08466	0.211894	2.91703	0.000574025	0.000138315
3671	3.00792	0.302411	2.90962	0.000247689	4.13926e-05
3672	0.183227	-3.9108	3.6859	9.52483e-05	1.07376e-05
3680	1.27335	-1.26817	3.18001	0.000122412	1.71999e-05
3701	0.769163	-4.07918	4.52807	1.63731e-05	1.08175e-06
3718	-1.43668	-4.70395	3.2171	5.33502e-05	5.30328e-06
3737	-4.14418	-1.14651	-3.31348	3.12585e-05	2.71935e-06
3749	0.541324	-4.34758	4.79108	5.33502e-05	5.43869e-06
3760	3.76688	1.89482	1.86329	0.00332143	0.00129282
3790	3.68214	2.20891	1.76886	0.00861004	0.00423117
3807	4.02516	-0.582077	4.50245	5.82802e-07	1.41127e-08
3817	-4.26924	1.95207	-4.98593	0.000247689	4.13926e-05
3818	-5.51429	-3.1706	-2.57761	0.00683823	0.00323206
3833	-4.6634	-2.42537	-2.17316	0.00304997	0.00113519
3858	2.88313	0.571095	2.34718	0.000207913	3.26322e-05
3869	-0.588658	2.64407	-3.14643	0.00525476	0.00231712
3903	3.48319	-1.49076	4.8334	2.96289e-06	1.24007e-07
3905	-4.10563	-1.35011	-2.44831	0.00161158	0.000515996
3938	-4.78323	-0.248886	-4.53435	0.00673582	0.00311318
3949	-4.74869	2.09723	-5.84587	0.00332143	0.00129282
3974	-0.716334	-4.05503	2.83332	0.000800003	0.000205636
3975	-1.28006	-3.90721	2.18061	0.00332141	0.00125906
3985	-4.33895	-2.09457	-1.92577	0.00161158	0.00050294
3989	0.00254223	-2.67768	3.13182	0.000468019	0.000107735
4026	3.33275	0.204121	3.12863	0.000509791	0.000120399
4027	2.92816	-2.80287	4.87799	2.36914e-05	1.70691e-06
4030	3.06175	-1.48035	4.40876	0.000122412	1.71999e-05
4033	2.34265	-3.69361	5.88039	0.000468019	0.000107735
4035	3.72925	-1.53928	5.22413	1.68445e-06	6.65668e-08
4042	-1.41559	1.31064	-3.0989	0.00495486	0.00212414
4053	3.24796	1.43928	1.66086	0.0006792	0.000168125
4064	-3.83153	-1.12584	-2.38879	0.00872188	0.00430227
4065	-1.79578	1.76409	-3.21305	0.000210318	3.3296e-05
4080	0.989222	-2.61642	3.2038	0.0010109	0.000277431
4081	0.307223	-3.61367	4.28882	0.000468019	0.000107735
4092	-4.68084	-3.04156	-1.65683	9.52483e-05	1.08774e-05
4104	-3.71752	-1.72288	-1.83597	0.00618971	0.00279971
4131	2.68403	-2.01655	4.31234	0.000122412	1.71999e-05
4135	-0.104407	-3.70365	3.08299	0.000234694	3.83789e-05
4154	-4.46567	-0.768788	-3.55124	4.36414e-09	3.78356e-11
4156	-4.71037	1.10345	-5.66727	0.000122412	1.71999e-05
4158	-4.82818	1.2511	-5.73612	0.000468019	0.000107735
4187	-2.53963	0.816001	-2.97553	0.00929455	0.00474036
4198	0.631284	-2.12482	3.13795	0.000488081	0.000113083
4207	3.21716	-2.75766	5.8669	7.63318e-06	4.26728e-07
4209	3.24013	0.532239	2.47698	0.00332143	0.00129282
4216	-1.96472	-4.30956	2.34485	0.00861004	0.00423117
4217	-1.09646	-4.26032	2.92421	0.000258402	4.38009e-05
4227	3.02231	0.774411	2.4784	0.00140771	0.000430942
4245	-4.61356	1.50604	-5.50133	0.000207913	3.26322e-05
4259	-3.10145	-1.15377	-1.93139	0.00400011	0.00161679
4264	2.31818	-3.33426	5.14851	0.000863868	0.000231398
4274	-1.33902	2.60448	-3.81578	0.00219013	0.000754148
4275	-1.58631	3.12192	-4.73391	0.000122412	1.71999e-05
4284	3.16856	1.31255	1.71977	0.00525476	0.00231712
4356	3.31618	1.5846	1.59338	0.00666559	0.00304485
4358	-3.7305	-2.21852	-1.61305	0.00499757	0.00216188
4359	3.15277	-0.539716	3.73761	0.001375	0.000403661
4361	-0.308615	2.00159	-3.03141	0.00219013	0.000754148
4365	-4.79796	3.02566	-7.7389	0.000122412	1.71999e-05
4368	-1.1741	2.90039	-4.0745	0.000247689	4.13926e-05
4374	3.74922	0.645032	3.37074	0.000371184	6.87994e-05
4383	-2.78197	-1.0708	-2.11075	0.00982121	0.00502658
4395	3.44969	2.46251	1.42179	0.00101813	0.000280329
4396	3.04206	0.925384	2.11668	0.00125028	0.000358452
4428	-0.742122	-3.15981	2.06872	0.00654663	0.00298659
4454	-4.78125	-2.72669	-1.98616	0.00525476	0.00231712
4459	3.80413	1.90329	1.79538	0.000468019	0.000107735
4467	3.47151	1.09706	2.15368	0.00481175	0.00204697
4470	3.16154	0.337193	2.38707	0.00683823	0.00323206
4480	-3.93027	-1.60022	-2.61228	0.00161158	0.000514208
4491	-2.22211	0.580714	-2.61794	0.00388284	0.00153921
4495	-2.02722	1.6477	-3.72839	0.00332141	0.00125906
4501	2.27082	0.403525	1.8673	0.00673582	0.00311318
4510	2.80291	0.558488	1.67525	0.00495486	0.00212305
4528	-4.60075	-1.18468	-2.58309	0.00332141	0.00124792
4536	1.86365	-2.07119	2.82556	0.000468019	9.9123e-05
4546	-4.61027	1.04821	-4.34678	1.55954e-05	1.00239e-06
4585	-4.41415	-0.857565	-3.4516	0.00219222	0.000773994
4589	-4.66034	-1.49634	-3.164	0.00219222	0.000768964
4596	3.30866	-0.312537	3.59449	0.00929455	0.00474036
4600	-1.09807	-3.78724	2.79664	0.000273803	4.67389e-05
4602	0.456939	-2.51968	2.96128	0.0090471	0.00450868
4606	0.7412	-3.48143	4.00686	0.00400011	0.00161679
4640	-3.28851	1.40173	-4.55338	1.07074e-05	6.49806e-07
4646	0.192679	-4.36979	4.61319	1.68445e-06	6.65668e-08
4652	0.084085	-1.83534	2.03017	0.00673582	0.00311318
4680	-3.04486	-1.54158	-1.75701	0.000468019	0.000107735
4682	3.26509	-1.34103	4.54301	6.61435e-11	1.77965e-13
4700	4.19599	1.09038	3.11301	0.000122412	1.71999e-05
4729	1.42961	-2.69635	4.56609	0.000808016	0.000215471
4733	-3.12848	-1.65356	-2.0612	0.00219222	0.000759677
4743	0.201312	2.664	-2.05235	0.00115432	0.000326797
4754	1.23441	-3.2436	3.82085	0.00517332	0.00227038
4763	2.56653	0.203188	2.36284	0.000429564	8.15804e-05
4782	-1.91476	-3.3296	1.50168	0.00392006	0.00156451
4792	3.10199	-0.2202	2.34562	0.00562375	0.00250505
4824	3.16427	-0.404211	3.56531	0.00161158	0.000515996
4847	-0.814621	-4.25134	3.26432	0.000109042	1.28018e-05
4850	1.28339	-1.48068	2.76603	0.00481175	0.00204697
4905	-4.58051	0.589473	-5.57331	0.00481175	0.00204697
4926	-3.40711	2.19574	-5.393	0.000468019	0.000107735
4932	-3.4975	-0.662694	-2.8766	0.00161158	0.000515996
4987	3.59177	2.04136	1.88146	3.32889e-05	2.9871e-06
4991	0.158468	-1.19203	1.88351	0.00517332	0.00227038
4992	2.57842	-3.04179	4.22954	0.000429564	8.19318e-05
4993	-1.3687	-4.36439	3.12064	0.00184816	0.000601687
4996	3.09279	-0.87904	3.98425	0.000509791	0.000120399
4999	-4.24439	-2.33997	-1.80789	0.000371184	6.66023e-05
5005	1.94204	-2.01138	4.00025	1.68445e-06	6.65668e-08
5026	-3.13323	-0.294306	-2.88197	0.000468019	0.000107735
5033	-1.36686	-4.43515	2.6663	0.00210519	0.000691032
5038	3.54008	0.811898	2.72818	0.000247689	4.13926e-05
5047	2.99809	0.253741	2.74435	0.001375	0.000403661
5066	-1.48727	-3.47479	2.30268	0.00525476	0.00231712
5072	-4.19306	0.203232	-2.58314	0.00794455	0.00384283
5073	3.37609	1.42137	1.88991	0.00481175	0.00204697
5084	-0.978266	-3.97017	3.61131	0.000808016	0.000215471
5086	-1.43224	1.8881	-3.40645	0.000188806	2.85908e-05
5109	-4.74982	-2.48816	-2.3812	0.000404427	7.56864e-05
5113	-4.83105	-1.38129	-3.054	0.000122412	1.71999e-05
5121	-0.268101	-4.38922	3.62574	0.000525256	0.000125779
5124	3.56528	-0.445659	3.73396	7.63318e-06	4.26728e-07
5130	1.33422	-0.828024	2.22642	0.00872188	0.0043002
5139	-2.58753	0.140527	-2.52845	0.00452817	0.00186271
5140	0.101252	-1.59317	1.6225	0.000957414	0.000258745
5142	-4.37279	-1.85479	-2.34018	9.52483e-05	1.08774e-05
5144	2.10396	-2.06339	3.64077	0.00140771	0.000430942
5151	2.69317	-2.93122	5.20333	8.49586e-05	9.25278e-06
5152	3.34675	-2.75601	5.16087	5.49792e-06	2.66267e-07
5165	1.71377	-2.54418	3.9257	0.00183178	0.000591974
5186	-0.497035	-3.73252	2.89569	0.000165306	2.43634e-05
5190	-0.794464	-2.82218	2.23033	0.000726396	0.000182196
5199	4.07902	-2.11239	5.65228	0.000122412	1.71999e-05
5201	2.17644	-3.57958	5.99538	3.12585e-05	2.71935e-06
5202	3.81266	-2.77482	6.51743	3.12585e-05	2.71935e-06
5203	1.90496	-3.38405	5.29418	0.000207913	3.26322e-05
5204	2.5369	-1.56361	3.79798	9.52483e-05	1.08774e-05
5212	0.884117	-3.15397	4.03809	0.000468019	0.000107735
5223	-0.0289559	-4.40937	3.43878	0.00693386	0.00329177
5226	2.05742	-0.95296	4.24647	0.000122412	1.71999e-05
5227	-0.438008	-3.61426	3.16337	6.65516e-05	6.92375e-06
5229	-0.835261	-4.00415	3.25415	0.00861004	0.00423117
5230	-0.0114492	-3.97669	2.58881	0.0003191	5.58067e-05
5232	3.00272	-3.17864	6.18135	4.43168e-07	1.0334e-08
5234	2.78007	-3.65118	6.43125	0.000509791	0.000120399
5235	0.870005	-2.92541	3.93356	0.000468019	0.000107735
5236	1.05777	-2.74817	3.58031	2.93513e-05	2.19367e-06
5237	-0.28374	-3.85872	3.72787	7.49771e-11	2.42375e-13
5238	-0.994361	-4.8178	3.60427	8.31185e-08	1.24243e-09
5240	0.257956	-1.95912	2.15192	0.00929455	0.00474036
5242	3.55262	-2.85194	6.37933	3.12585e-05	2.71935e-06
5243	3.20065	-2.46036	5.65926	4.43168e-07	1.0334e-08
5244	-0.0708327	-2.1739	2.14785	1.6251e-05	1.05643e-06
5246	-0.109422	-2.67336	2.90773	0.00261941	0.000943613
5247	0.360945	-3.86676	4.17103	5.19057e-05	5.12074e-06
5248	3.72901	-3.59486	6.48206	0.000468019	0.000107735
5249	0.623946	-3.83781	4.31707	0.000122412	1.71999e-05
5251	0.656611	-3.88318	4.09707	0.000210318	3.3296e-05
5273	1.11091	-2.02435	2.91599	9.52483e-05	1.08774e-05
5274	-2.54986	2.26877	-4.28697	0.000509791	0.000120399
5278	-4.31675	-2.59221	-1.71499	0.00343597	0.00134871
5283	1.72068	-1.20685	3.03887	0.00467162	0.0019301
5293	-4.43087	-1.35103	-3.07984	0.000109042	1.2914e-05
5322	2.77651	-1.08215	2.86271	0.000345466	6.11407e-05
5325	0.726772	-3.37095	3.94099	1.77919e-06	7.19035e-08
5326	1.94545	-2.3373	4.26421	0.000371184	6.87994e-05
5327	2.42681	-3.02521	5.05981	6.5932e-10	3.54791e-12
5344	-4.41591	-2.6011	-1.85884	4.1548e-05	3.85049e-06
5346	3.56997	0.256112	3.14675	0.00481175	0.00204697
5348	-4.61195	-0.81602	-3.5445	0.00184816	0.000601687
5350	2.79318	0.914165	1.80432	0.00444451	0.00182564
5352	-4.31676	0.820636	-4.63462	0.00616856	0.00278461
5383	4.15988	-0.0974253	4.1332	0.00683823	0.00323206
5421	2.6659	-3.31931	6.14069	0.000122412	1.71999e-05
5432	-1.99658	-3.8619	1.53652	0.00740587	0.00356234
5471	2.34459	-0.63692	3.02889	0.00683823	0.00323206
5474	2.35677	-1.14216	3.32096	0.000135642	1.97077e-05
5484	-2.46384	-4.24061	1.88943	0.00861004	0.00423117
5485	-0.719307	-3.52536	2.6739	3.81774e-05	3.48105e-06
5486	-0.899662	-3.27694	2.8117	3.12585e-05	2.71935e-06
5490	-1.61018	-3.53003	2.57934	1.02029e-05	6.16138e-07
5495	-3.87029	-1.75724	-2.10029	0.00533855	0.00236365
5497	-4.61159	2.24122	-6.70543	4.43168e-07	1.0334e-08
5502	-3.83217	1.5746	-5.2125	0.00131064	0.000382025
5513	2.38266	-1.97324	3.68765	0.00181712	0.000586692
5514	0.0397854	-3.57318	3.28742	0.000468019	9.9123e-05
5522	-4.84238	-1.59471	-3.21099	0.000468019	0.000107735
5525	-3.66531	1.74861	-4.11001	0.00127666	0.000369831
5535	0.531819	-2.92726	3.46483	0.00161158	0.000515996
5566	-0.525214	-3.35804	2.80127	0.00219013	0.000754148
5572	-1.51569	2.39468	-3.97649	0.00332143	0.00129282
5574	3.31515	-0.487634	3.52954	0.000468019	0.000107735
5577	0.643679	-2.75326	3.25541	0.00481175	0.00204697
5578	0.627516	-2.01973	3.10952	0.00161158	0.000511237
5582	-4.88119	-2.02764	-2.50634	0.000122412	1.71999e-05
5583	-4.55472	-2.21094	-2.24769	0.00332141	0.00125906
5587	-1.46997	-3.74723	1.85657	0.00799184	0.00387049
5593	-4.39454	1.07685	-5.32053	0.000468019	0.000107735
5603	2.31239	-1.51889	4.42341	3.32889e-05	2.99551e-06
5608	2.16367	-0.524381	2.20048	0.0090471	0.00450868
5658	2.9034	-2.30247	4.46621	0.00210852	0.000701591
5681	-2.20412	1.39128	-3.38868	0.00016573	2.45251e-05
5703	2.51493	-0.391767	3.01856	0.000468019	0.000107735
5706	-4.24911	-1.21532	-3.07643	0.000468019	0.000107735
5707	2.67915	-0.974304	3.22745	0.00929455	0.00474036
5742	-1.33995	2.19766	-3.66075	0.00332143	0.00129282
5754	-0.467597	1.62922	-2.14283	0.000509791	0.000120399
5755	-0.631982	1.17653	-2.12126	0.00332143	0.00129282
5756	-1.68258	-4.41029	2.43067	0.000585357	0.000141571
5758	0.429057	-4.39827	4.52218	0.000175052	2.61139e-05
5759	-1.22791	-4.3802	2.99506	0.00140771	0.000430942
5761	-0.38123	-3.55068	3.00155	3.77782e-05	3.43335e-06
5766	-2.68847	3.20545	-5.88123	0.000132377	1.90354e-05
5771	-1.43321	-3.10233	1.67572	0.00111155	0.000307046
5774	-1.43622	1.6573	-3.88741	0.00481175	0.00204697
5779	-1.03966	-3.2674	2.56807	0.000468019	0.000107735
5780	-4.83008	-2.8605	-2.1044	0.00929455	0.00474036
5783	-3.58911	-0.708715	-3.20418	0.000808016	0.000215471
5819	1.36085	-4.61442	6.0943	4.43168e-07	1.0334e-08
5826	-1.99165	-4.80452	2.80317	1.68445e-06	5.98938e-08
5827	-1.97311	-4.64006	2.64571	0.000333303	5.88885e-05
5828	0.0162657	2.72706	-2.42633	0.00332143	0.00129282
5829	-0.819059	2.59032	-3.28322	0.00140771	0.000430942
5832	1.53832	-1.22126	2.812	1.35299e-05	8.53456e-07
5842	0.423661	-3.49963	3.77236	0.000468019	0.000107735
5845	-1.96645	-4.41973	2.60393	3.12585e-05	2.47987e-06
5848	-2.19492	2.59573	-4.7161	0.000297466	5.16676e-05
5851	2.97665	-1.88007	4.35554	0.00332143	0.00129282
5868	-1.71011	-3.78386	2.03895	0.000971857	0.000264973
5872	-0.873275	1.48398	-2.08713	0.00499757	0.00216188
5874	-0.689599	-3.05033	2.53456	0.00184816	0.000601687
5887	-4.22959	-2.56406	-1.61427	0.00452817	0.00186271
5897	-0.721205	-3.8723	3.07922	0.000109042	1.2914e-05
5898	-3.53995	-0.871512	-2.70709	0.000371184	6.87994e-05
5904	1.81922	-0.667914	2.59343	0.000593449	0.000143883
5911	0.346039	-3.49152	4.60988	8.48044e-05	9.18689e-06
5916	0.510449	-4.59186	4.78224	1.60592e-10	6.72135e-13
5917	-4.04449	-1.19446	-2.7876	0.000800003	0.000206398
5933	-1.30986	-3.70663	2.28031	0.00517332	0.00227038
5934	1.0039	-2.03372	2.79152	0.00342156	0.00133691
5943	-4.36921	-1.76436	-2.07296	0.00131064	0.000382025
5952	-4.58359	2.09041	-6.67399	0.000122412	1.71999e-05
5964	-2.39712	-3.93826	1.77283	5.43853e-06	2.58513e-07
5977	-4.54046	-0.541724	-3.92128	0.00125028	0.000358452
5979	-3.16404	-0.0259027	-3.56673	0.00392006	0.00156451
6002	2.26096	-1.48733	3.80347	0.000122412	1.71999e-05
6004	-2.32643	-3.67659	1.61683	0.00562375	0.00250505
6005	2.87958	-2.56322	5.61234	0.000122412	1.71999e-05
6006	0.976121	-3.10194	4.45919	0.000468019	0.000107735
6007	2.04417	-1.9479	3.31609	0.000207913	3.26322e-05
6009	2.75526	-2.54124	5.13494	0.00929455	0.00474036
6010	2.51571	-2.53558	5.01493	0.000958547	0.000261057
6025	-3.71586	-1.09071	-2.63433	0.000468019	0.000107735
6027	-2.65504	-4.03627	1.45726	0.00628476	0.0028521
6029	-3.17877	-0.560507	-2.71163	0.000468019	0.000107735
6048	-4.62182	-2.64258	-1.82491	0.000429564	8.19318e-05
6050	3.87801	-0.536228	4.08244	0.000404427	7.56864e-05
6055	-3.19652	-1.39874	-1.80996	0.00628476	0.0028521
6058	-1.57751	3.0813	-3.52647	0.0090471	0.00450868
6062	2.44979	-3.9895	3.69633	0.00628476	0.0028521
6073	-1.49324	0.481759	-2.13168	0.00444451	0.00182564
6078	-4.43582	0.122042	-4.27879	9.52483e-05	1.08774e-05
6083	-4.80762	-3.2031	-1.6735	0.00904872	0.00451489
6099	3.32347	-1.93426	5.29479	0.000122412	1.71999e-05
6100	4.00498	-1.35505	5.1623	7.63318e-06	4.26728e-07
6126	0.130447	-3.48501	3.42144	0.000234694	3.83789e-05
6139	0.430836	-2.70904	2.97528	4.18328e-06	1.96345e-07
6167	-3.79058	-0.520915	-3.6405	1.30265e-09	8.56752e-12
6171	-0.219981	-2.63553	2.34721	0.000188806	2.85752e-05
6182	0.394571	-4.09136	3.78583	0.00311059	0.00116054
6192	-0.631707	-2.42134	1.78894	0.0087996	0.00435113
6201	-4.28911	-2.00099	-2.28811	0.00628476	0.0028521
6207	-3.98339	-0.549697	-3.33083	0.00361663	0.00142503
6213	-0.193421	-4.60788	4.25556	1.97928e-05	1.3491e-06
6215	-0.359506	-3.32215	2.70261	0.00230376	0.000818883
6269	1.89146	-2.13255	3.36881	3.12585e-05	2.71935e-06
6270	0.777872	-2.79921	3.78128	4.64754e-05	4.45997e-06
6272	0.223902	-2.39625	2.60033	0.00929455	0.00474036
6277	3.15937	-1.72223	4.4843	0.00219013	0.000754148
6281	0.282382	-2.80335	2.98717	2.46746e-05	1.80726e-06
6289	3.18301	-2.31973	5.20077	0.00125028	0.000358452
6298	-0.627961	2.78254	-3.27592	0.000800003	0.000206398
6304	-4.82802	-1.24928	-3.41383	5.03763e-05	4.89456e-06
6311	0.715672	-4.13835	4.8101	0.000808016	0.000215471
6321	0.604642	3.06439	-2.41944	0.000297466	5.16676e-05
6338	-0.0847169	-3.89267	3.78532	0.00392006	0.00156451
6346	0.998662	-3.64427	3.5062	0.00499757	0.00216188
6349	1.11734	-2.49607	3.50611	0.000512944	0.000122371
6350	2.9778	-4.30231	6.14335	0.000509791	0.000120399
6355	3.39633	-0.528746	2.84365	0.00628476	0.0028521
6365	2.64111	0.142988	2.28437	0.00291571	0.00106256
6366	2.49493	0.22492	1.986	0.00343597	0.00134871
6373	0.951597	-3.30076	4.05708	0.000509791	0.000120399
6375	1.39798	-1.69913	2.67477	0.00112394	0.000311142
6376	2.96528	1.53634	1.56669	0.00673582	0.00310657
6377	-4.8253	-2.62062	-2.02492	2.01847e-07	3.67006e-09
6387	1.50009	-2.02789	3.94585	1.43403e-06	4.79357e-08
6390	0.713575	-1.80815	3.06256	0.000488081	0.000113083
6391	1.51568	-3.05249	4.65952	7.63318e-06	4.26728e-07
6393	2.99628	-0.60199	4.02725	3.83091e-08	4.92464e-10
6395	3.69908	-0.0505985	3.56259	1.48051e-08	1.50485e-10
6397	-4.06749	1.36888	-5.55088	7.63318e-06	4.26728e-07
6398	-4.06509	-2.106	-1.73399	0.00463261	0.0019126
6413	-4.18587	0.936282	-5.08688	0.000468019	0.000107735
6424	0.151398	-2.52545	3.1513	3.12585e-05	2.71935e-06
6442	0.745582	2.42129	-1.67658	0.00115432	0.000326797
6451	4.53651	1.10296	3.52845	3.12585e-05	2.71935e-06
6464	-4.09176	-2.74291	-1.4105	0.000207913	3.20076e-05
6497	0.841811	-3.5983	4.19983	0.00210852	0.000701591
6527	-2.18092	-4.85681	2.43953	0.000649202	0.000159147
6528	-1.36675	-4.04568	2.77351	0.00150893	0.000465987
6529	-2.49115	-3.80097	1.67723	0.00389851	0.00154659
6556	1.08664	-3.58197	4.43201	8.49586e-05	9.27052e-06
6557	1.83204	-4.64386	6.20269	4.18328e-06	1.96345e-07
6563	0.441942	-3.46575	3.84486	0.00400011	0.00161679
6572	-0.685596	2.22419	-2.70143	0.00517332	0.00227038
6579	2.24993	-1.35991	3.6479	0.000468019	0.000107735
6581	1.33376	-1.41856	2.87891	0.000957414	0.000258745
6592	0.407104	-4.81255	4.75094	1.27229e-06	3.80354e-08
6594	-1.90842	-4.59643	2.60924	0.00683823	0.00323206
6597	-3.48625	2.03525	-5.55444	0.000468019	0.000107735
6625	-4.22146	2.26484	-6.29767	0.000808016	0.000215471
6674	-1.71007	1.42349	-2.97341	0.000800003	0.000206398
6737	-4.99637	-1.79794	-3.17752	0.00740587	0.00356234
6739	3.0988	1.76967	1.50874	0.00683823	0.00323206
6748	1.72147	-0.649405	2.21487	0.00331682	0.00124244
6750	2.58387	-0.0469406	2.32265	0.000119384	1.42761e-05
6751	0.794803	3.32013	-2.60732	0.000196817	2.99491e-05
6815	-4.86244	-2.2287	-2.51264	1.99991e-06	8.19097e-08
6833	1.9007	-2.20687	4.26867	0.000188806	2.85908e-05
6835	3.7574	-0.91959	4.46907	1.72554e-11	3.76776e-14
6837	3.66926	0.352644	3.03655	0.000371184	6.78439e-05
6841	-4.38822	-0.760131	-3.03513	0.00693386	0.00329177
6846	2.27364	0.186387	2.03054	0.0090471	0.00450868
6861	2.3525	-0.825655	3.15209	0.00929455	0.00474036
6870	1.86242	-0.348266	2.50439	0.00673582	0.00311318
6871	2.78879	0.100604	2.77814	0.00481175	0.00204697
6888	-0.631963	-3.91455	3.03093	0.00185429	0.000605346
6892	1.53155	-2.41439	3.90762	1.55954e-05	1.00239e-06
6897	-0.440871	-3.24873	2.72658	0.00481175	0.00204697
6899	0.0524165	-3.21567	2.81053	0.000719478	0.00017831
6904	2.16782	-2.16616	4.13226	0.00161158	0.000511237
6906	0.0994798	-3.17948	2.97203	0.00161158	0.000515996
6928	-2.56053	-4.41499	1.86563	0.000808016	0.000211585
6933	0.671638	-4.14381	4.05228	4.1548e-05	3.82356e-06
6940	-4.55846	1.03688	-5.38517	0.000468019	0.000107735
6949	-2.0244	0.836089	-2.68702	0.000297466	5.16676e-05
6977	-1.35798	1.05434	-2.26821	0.00740587	0.00356234
6979	2.3896	-0.297163	2.7568	0.00693386	0.00329106
6987	-0.145963	-4.24799	4.1264	1.02956e-07	1.7026e-09
6989	0.619818	-3.53637	3.75126	0.00210852	0.000701591
6990	1.02416	-2.90833	3.86705	0.00140771	0.000430942
6992	1.0394	-2.62658	3.5516	0.000247689	4.13926e-05
7013	-1.2629	-4.2348	2.70987	0.00219222	0.000768964
7015	1.68795	-4.38338	5.64614	0.000863868	0.000231398
7018	0.533113	-2.1978	2.77332	0.00140771	0.000430942
7022	1.37402	-2.60775	4.07263	9.23191e-05	1.01841e-05
7025	1.72391	-2.73547	3.82021	0.000464618	8.959e-05
7029	-4.79654	-1.58047	-2.83666	0.00481175	0.00204697
7039	3.81588	-1.9875	5.81147	0.000468019	0.000107735
7042	-0.545979	-3.06847	1.96774	0.00021191	3.43997e-05
7048	-0.249889	-3.3421	3.36378	0.000333303	5.88885e-05
7049	-1.22144	-3.98403	2.02821	0.00792992	0.00382391
7068	-3.8583	1.31128	-4.8386	4.43168e-07	1.0334e-08
7104	-0.405596	-3.77022	3.0238	0.000585357	0.000141418
7115	1.3858	-2.7016	4.27895	3.12585e-05	2.71935e-06
7128	0.672418	-1.73612	2.59108	0.00929455	0.00474036
7133	1.25605	-1.27872	2.96066	0.000468019	0.000107735
7135	2.0504	-2.3222	3.91941	0.00683823	0.00323206
7139	-0.735162	-4.21062	3.79444	1.63731e-05	1.08175e-06
7158	-0.49643	-3.69778	4.57027	0.00115432	0.000326797
7160	0.128203	-2.15263	2.16141	0.0006792	0.000168125
7161	-0.957792	-4.48905	3.48363	0.000371184	6.66023e-05
7178	-4.50581	0.97685	-5.48266	0.000122412	1.71999e-05
7187	-1.17053	-4.62577	2.89154	1.5868e-06	5.45537e-08
7188	0.695532	-4.31411	5.54337	1.34241e-06	4.13358e-08
7194	-4.35861	-2.24014	-2.11847	0.000109042	1.28018e-05
7218	-4.13231	-2.38379	-2.15563	0.00444451	0.00182564
7249	2.21244	-4.17733	6.25014	0.00021191	3.43997e-05
7250	-1.48857	-4.38015	2.68084	1.55954e-05	1.00239e-06
7260	0.246823	-4.04005	4.18142	1.68445e-06	6.65668e-08
7266	-4.78249	-2.67913	-2.12195	0.000122412	1.71999e-05
7306	-1.09154	-4.16169	3.34269	6.86371e-08	9.84927e-10
7345	-0.142281	-2.89565	2.70406	0.00554818	0.00246475
7358	-0.496255	-3.95504	3.49072	0.00332143	0.00129282
7368	-4.87472	-1.72462	-3.1442	1.34241e-06	4.13358e-08
7394	-1.49157	-3.68307	2.13197	0.00219013	0.000754268
7428	-1.76909	-4.46476	2.32471	0.000362091	6.41913e-05
7430	-4.97614	-1.97931	-2.40505	0.00130542	0.000378942
7442	-0.755264	-4.44326	3.24291	0.00168293	0.000540851
7444	-3.23581	1.91173	-4.70407	0.00332143	0.00129282
7449	1.96119	-0.344705	2.48055	0.00303057	0.00111619
7450	0.147714	-1.42118	2.05634	0.000122412	1.57283e-05
7452	0.903787	-1.486	2.50789	3.32889e-05	2.9871e-06
7454	-1.49108	-3.50164	2.10667	0.000481762	0.000111043
7459	-2.22843	-4.48445	2.19473	0.000122412	1.57283e-05
7461	-3.7284	0.519596	-4.31754	3.12585e-05	2.71935e-06
7503	3.55076	1.70095	1.89709	0.0090471	0.00450868
7504	-4.98291	-2.42222	-2.5571	1.87197e-05	1.26477e-06
7506	-4.65884	0.101317	-4.29082	0.000297466	5.16676e-05
7510	3.48048	1.01931	2.14784	0.000132377	1.90354e-05
7517	2.3634	-1.23381	3.10614	0.000172002	2.55561e-05
7518	2.30823	-0.410336	2.74805	0.00332143	0.00129282
7572	-1.40223	0.733486	-2.30249	0.00181712	0.000586692
7578	0.503527	2.8204	-2.07235	0.00683823	0.00323206
7581	-1.20088	2.97721	-4.41586	0.00499757	0.00216188
7590	-4.04363	-1.2951	-3.04755	0.00332143	0.00129282
7626	0.689052	-1.27182	1.75132	0.00363963	0.00143518
7628	-4.12958	-0.964449	-2.92757	0.000371184	6.87994e-05
7629	0.418165	2.95531	-2.67561	0.00219222	0.000768964
7639	-1.75448	3.0289	-5.09755	0.00481175	0.00204697
7647	-2.47205	2.47883	-4.39463	9.19409e-05	1.00874e-05
7648	3.41191	0.711835	2.73746	0.000122412	1.71999e-05
7660	3.38629	0.0942778	3.32544	3.12585e-05	2.71935e-06
7666	-4.04195	-1.36823	-2.76951	7.63318e-06	4.26728e-07
7693	-2.57532	2.40284	-4.40235	6.3119e-05	6.49117e-06
7723	-1.02122	-4.04149	3.33018	3.12585e-05	2.71935e-06
7744	-0.695159	-3.35346	3.07079	0.00929455	0.00474036
7749	-1.46317	-4.18301	2.81509	0.00140771	0.000430942
7751	-0.76122	-3.35926	2.56752	3.07129e-08	3.6727e-10
7752	-0.692348	-3.43594	2.30379	0.00463261	0.0019126
7753	0.0274268	-3.67785	3.35833	0.000371184	6.87994e-05
7757	2.62239	-1.61239	4.12066	0.000808016	0.000215471
7758	2.88447	-0.901828	3.89467	0.000468019	0.000107735
7760	-1.00435	-2.83671	2.41623	0.00400011	0.00161679
7777	-0.0471464	-3.89218	3.77129	0.00115432	0.00032601
7785	0.182016	-1.87178	2.12817	0.000808016	0.000215471
7786	0.740817	-3.45529	4.1961	0.000468019	0.000107735
7793	1.13502	-2.43399	3.90428	0.000468019	0.000107735
7794	-1.19857	-4.46662	3.20976	3.80144e-07	7.37795e-09
7800	-1.93314	-3.84151	1.7887	0.000237198	3.88593e-05
7801	0.754569	-2.62158	3.2418	8.62505e-06	5.02805e-07
7803	2.67102	-2.61402	5.02398	3.12585e-05	2.71935e-06
7804	0.55591	-1.93331	2.38232	7.63318e-06	4.10441e-07
7805	0.81361	-1.62055	2.43421	1.39039e-06	4.36444e-08
7808	3.59132	-2.06121	5.38965	7.63318e-06	4.26728e-07
7809	-0.969202	-2.60399	1.72473	1.23417e-05	7.56369e-07
7810	0.762751	-2.74563	2.90745	6.45888e-07	1.66058e-08
7811	-0.559801	-3.33476	2.59395	0.000468019	0.000107735
7814	0.593516	-3.16846	3.47466	1.00543e-06	2.85548e-08
7815	3.24859	-2.54723	5.06399	0.00210852	0.000702211
7816	-0.48398	-3.42818	3.18388	6.94866e-14	4.15465e-17
7817	-0.333658	-2.85362	2.50564	0.00219013	0.000754148
7825	-3.40854	3.24039	-6.27947	0.00683823	0.00323206
7847	-0.69616	-3.93948	2.68936	0.00226676	0.000802345
7867	-0.490734	-3.92034	3.50035	3.42771e-06	1.54992e-07
7874	-4.66939	2.493	-7.17099	0.000122412	1.71999e-05
7938	-1.23685	-3.94794	3.19086	0.000509791	0.000120399
7945	-1.03035	-4.18221	3.27308	0.000468019	0.000107735
7948	1.32524	-3.80238	5.377	7.63318e-06	4.26728e-07
7949	-0.163785	-3.5578	3.48149	0.00125028	0.000358452
7951	0.102292	-4.02708	4.15321	0.00481175	0.00204697
7952	-1.64757	1.36412	-3.16927	0.00929455	0.00474036
7965	1.48098	3.40466	-2.13402	0.000627988	0.000153195
7974	2.7349	0.697043	2.03786	0.00673582	0.00311318
7983	-3.94289	0.33833	-4.39115	1.68445e-06	6.65668e-08
7984	-4.76256	-0.524438	-4.18931	3.02947e-06	1.33134e-07
7991	-1.36425	1.26832	-2.57518	0.00332141	0.00125906
8013	0.530843	-4.57262	5.28955	9.89783e-08	1.59786e-09
8031	-1.20848	-3.71881	2.32646	0.00241747	0.000862196
8037	-1.68724	1.13185	-2.79349	0.00161158	0.000515996
8038	-4.63626	-2.43786	-2.14405	3.12585e-05	2.71935e-06
8043	-3.66601	-1.83449	-1.62755	0.00332143	0.00129282
8102	-3.32186	-0.994431	-2.21305	0.000258402	4.38009e-05
8119	2.58819	1.10357	1.96649	0.00740587	0.00356234
8120	3.14103	0.223814	1.99459	8.48044e-05	9.20298e-06
8131	-0.558214	-3.02932	2.41174	0.000386186	7.18109e-05
8132	-1.56907	-4.42089	2.94972	0.000468019	0.000107735
8133	-0.0512935	-3.0794	2.84386	0.000264493	4.49125e-05
8134	-0.894901	-3.22309	2.01754	0.00261941	0.000938312
8138	-1.69039	-4.95364	2.42356	0.00219222	0.000773994
8139	0.298094	-3.57291	3.72184	7.59684e-05	8.10783e-06
8157	1.14928	-2.707	3.99805	0.000512944	0.000122371
8175	0.120271	1.32058	-1.49273	0.00226676	0.000802345
8189	-2.85499	0.0923986	-2.77	0.000468019	0.000107735
8211	-2.45886	2.71672	-5.3078	0.000122412	1.71999e-05
8246	-4.79845	-0.087792	-4.6004	0.000122412	1.71999e-05
8253	-1.79214	-4.08889	2.56367	0.00217462	0.000727475
8289	-4.55896	-2.00894	-2.53479	0.00481175	0.00204697
8303	-1.48399	-3.9525	2.28411	0.00120811	0.000342389
8309	-3.09555	-1.02743	-2.01826	0.00683823	0.00323206
8317	-0.578514	-2.6558	1.93771	0.00481175	0.00204697
8367	-1.95032	-3.29226	1.45801	0.0087996	0.00435113
8378	0.133869	-3.67955	3.95403	8.62505e-06	5.02805e-07
8393	-1.69909	2.21693	-3.85125	1.04692e-06	3.03593e-08
8401	2.38622	-0.559371	3.01112	0.000726396	0.000182196
8402	-1.39907	3.06467	-4.46375	7.59684e-05	8.10783e-06
8404	-1.5449	-3.67316	2.02842	0.00510021	0.0022078
8408	0.0899605	-4.19328	4.12538	0.000468019	0.000107735
8421	0.693153	-2.41328	2.7754	0.00861004	0.00423117
8439	-0.362734	1.60274	-1.88926	0.00219222	0.000768964
8448	-4.84094	-2.96506	-2.16376	0.000122412	1.71999e-05
8464	0.0538043	-2.40693	2.28462	0.00210519	0.000691032
8473	0.192724	-1.67737	1.88863	0.000246137	4.05446e-05
8478	0.442088	1.54474	-1.51035	0.00303057	0.00111619
8485	-4.31314	0.651194	-5.02644	1.68445e-06	6.65668e-08
8525	-5.02498	-0.83512	-3.88108	9.89783e-08	1.59786e-09
8527	-4.33247	-1.83898	-2.52176	0.000429564	8.15804e-05
8533	-0.878178	-3.93167	2.64898	9.68123e-07	2.72059e-08
8542	-0.862753	-3.26912	2.49128	0.00140771	0.000430942
8550	-0.742291	-4.28221	3.51206	0.000122412	1.57283e-05
8558	-0.597884	-2.91595	2.31807	0.00304997	0.00113519
8562	4.03157	1.72458	2.15079	0.00517332	0.00227038
8571	-4.02197	-0.458447	-3.60351	0.00404941	0.00165608
8586	0.206256	2.80239	-2.8627	0.00400011	0.00161679
8588	-4.07899	-1.79475	-1.95997	0.00872188	0.00430227
8615	-1.16983	-4.73341	3.58259	2.69354e-05	1.997e-06
8616	-0.655981	-4.26973	3.58858	0.00861004	0.00423117
8617	1.15089	-1.08084	2.20947	0.000808016	0.000215471
8619	3.35237	0.75554	2.33331	0.00683823	0.00323206
8641	0.640609	-1.41855	2.44722	7.48012e-06	3.71211e-07
8647	2.22979	-2.84353	4.78499	0.00127666	0.000369831
8655	-0.198535	-2.40208	2.5395	0.00934401	0.00477117
8656	2.86352	-2.33583	4.56886	0.000585357	0.000141418
8665	-2.26477	-4.32108	2.38225	0.000649202	0.000159147
8667	0.743687	-5.24845	5.30034	0.00161158	0.000511237
8676	0.874361	-3.10921	4.30625	1.53263e-07	2.61166e-09
8681	2.06304	-2.37872	3.79544	0.000247689	4.13926e-05
8687	-0.411178	-3.80286	3.47046	6.29697e-05	6.45698e-06
8689	-0.183264	-3.9311	3.66539	0.000221635	3.60446e-05
8696	-4.35559	-2.31128	-1.59222	0.00740587	0.00356234
8725	2.30565	-0.616474	3.07134	0.00295647	0.00108094
8741	2.06257	-1.15324	3.16386	2.09378e-05	1.43642e-06
8751	3.93523	1.25661	2.67862	0.000122412	1.71999e-05
8767	-3.59204	-1.86322	-1.68527	0.00219222	0.000768964
8770	-4.53158	-1.88306	-2.75853	0.00332143	0.00129282
8775	-4.20238	-2.90636	-1.48	0.00115432	0.000323981
8797	-0.517236	-3.66527	3.14803	0.00219013	0.000754148
8798	-1.20938	-4.15739	3.05688	0.000863868	0.000231398
8800	-0.00787926	-3.97199	4.20311	3.12585e-05	2.71935e-06
8806	-0.373205	-2.96433	2.5353	0.00161158	0.000499717
8807	-1.01782	-4.2308	3.135	9.99133e-06	5.94402e-07
8812	1.80406	-3.9016	5.35942	0.00210852	0.000701591
8813	-1.46046	-3.43171	1.94798	0.00861004	0.00423117
8826	-4.25189	0.385854	-4.48721	7.63318e-06	4.26728e-07
8832	-1.83553	-3.42427	1.42563	0.00161158	0.000511237
8835	2.88168	0.440705	2.08402	0.000100612	1.16102e-05
8850	1.20061	-3.56431	4.42911	9.29469e-07	2.58417e-08
8853	-0.445544	-4.19063	3.64083	3.07129e-08	3.6455e-10
8856	3.34193	1.62578	2.15061	4.1548e-05	3.82356e-06
8860	-0.800277	-4.93005	4.05884	0.00161158	0.000515996
8873	4.23428	-1.30347	5.49913	0.000122412	1.71999e-05
8875	3.26252	-3.53305	6.7128	1.00878e-10	3.9205e-13
8890	-0.493905	1.99063	-2.77598	0.00495486	0.00212414
8896	0.203047	2.53116	-2.2616	0.000207913	3.26322e-05
8897	-0.716895	2.91727	-3.67592	0.00683823	0.00323206
8900	-3.90704	-1.53154	-1.76263	0.00693386	0.00329177
8902	1.54711	-1.49514	3.14816	0.000297466	5.16676e-05
8914	0.622705	-1.38138	2.00408	0.00929455	0.00474036
8918	-3.49344	0.173995	-3.20664	0.000114238	1.36266e-05
8927	1.76343	-1.26055	2.89632	6.86371e-08	9.76445e-10
8940	0.250451	-2.34555	2.18009	0.00357486	0.0014043
8957	-2.94671	-0.580128	-2.20612	0.000142575	2.08854e-05
8960	-3.97092	-1.91372	-1.98243	0.00142889	0.000438279
8962	-0.582186	2.56605	-3.14824	0.00161158	0.000515996
8987	-1.80564	0.0330461	-1.76769	0.000279272	4.78395e-05
8998	1.5133	-3.3921	3.54882	1.47429e-06	4.98041e-08
8999	-4.50946	1.66209	-6.17093	0.000468019	0.000107735
9000	-4.23105	-1.74889	-2.11393	0.00140771	0.000430942
9002	-4.03279	-1.99116	-2.07675	0.000468019	0.000107735
9011	-3.75106	-1.68793	-1.90109	2.36335e-05	1.65328e-06
9019	-3.87059	-0.0237906	-3.83994	0.00021191	3.43997e-05
9022	-1.60963	2.05705	-3.42467	0.000468019	0.000107735
9056	-1.95448	2.01008	-3.72184	3.02947e-06	1.33134e-07
9073	3.4649	-1.318	3.99365	1.78016e-07	3.08668e-09
9076	2.1791	0.0495955	1.99663	0.00481175	0.00204697
9086	-2.1303	0.863587	-3.19054	1.58232e-06	5.39265e-08
9099	-4.26064	-2.96938	-1.51808	0.00533855	0.00236365
9144	1.27311	0.163072	1.42628	1.56837e-05	1.01276e-06
9147	-2.68504	1.55914	-4.1418	6.65516e-05	6.92375e-06
9152	2.09574	-0.318964	2.45875	3.42004e-06	1.52343e-07
9153	1.48066	-1.11712	2.041	0.00112394	0.000311142
9214	0.0114109	-3.55416	3.1186	0.000384122	7.13124e-05
9237	-1.70387	2.79436	-4.13863	0.00140771	0.000430942
9244	1.67916	-0.0702152	1.80676	0.000109042	1.2931e-05
9271	1.03331	-1.368	2.12682	0.00210852	0.000701591
9335	-3.62832	-0.228053	-3.38507	0.000509791	0.000120399
9361	1.38078	-2.93341	4.20953	0.00332143	0.00129282
9401	3.44964	-2.66167	4.94472	0.00219013	0.000754148
9407	-3.03329	1.45469	-4.26366	0.000122412	1.71999e-05
9474	-0.188883	-3.58479	3.40251	0.00404941	0.00165608
9483	0.52218	-3.97162	4.22956	1.6251e-05	1.06397e-06
9503	-4.46157	-2.90253	-1.5837	0.00525476	0.00231712
9507	3.13613	1.824	1.74499	0.00131922	0.00038492
9508	-3.62959	-1.10538	-2.52421	0.00140771	0.000430942
9510	-4.89695	0.0116571	-4.7457	1.68445e-06	5.93078e-08
9511	-3.78133	-0.1933	-3.18235	0.000800003	0.000206398
9513	-4.23459	-2.46588	-2.09076	2.17078e-06	8.9557e-08
9521	-3.51449	1.08826	-4.60275	0.000122412	1.71999e-05
9524	0.0790264	-3.59952	3.62859	2.46746e-05	1.80726e-06
9540	1.76983	-2.52887	4.43121	0.000431636	8.25852e-05
9544	-0.159892	-4.65943	3.44804	0.00342156	0.00133691
9549	0.621542	-4.71057	5.28672	3.83091e-08	4.92464e-10
9550	0.176192	-3.62957	3.72076	1.55954e-05	1.00239e-06
9555	-0.739465	-3.80571	2.18573	0.00487956	0.00207874
9591	-4.70526	-1.97667	-2.66774	1.02029e-05	6.16138e-07
9592	-4.49052	-1.53009	-3.10701	0.000132988	1.92028e-05
9593	-4.74003	-0.695418	-3.56965	7.63318e-06	4.26728e-07
9596	-4.38523	-0.466798	-4.01523	0.000122412	1.71999e-05
9597	-4.66809	-2.88505	-1.66989	4.1548e-05	3.84781e-06
9607	-1.39855	-3.42331	2.22757	0.00016573	2.45251e-05
9609	0.507695	-2.16549	2.68226	0.00168293	0.000540851
9611	0.00864545	-1.89083	1.89947	0.00606884	0.00271057
9612	-1.25237	-3.407	1.74333	0.00305504	0.00113891
9613	0.497531	-3.39609	3.01916	0.00125028	0.000358452
9615	-0.821471	-4.26476	2.45967	0.00219222	0.000768964
9616	0.0918727	-2.61067	3.47729	0.00161158	0.000515996
9620	0.793921	-1.99606	2.97644	0.00673582	0.00311318
9623	-0.92037	-4.82608	3.56417	6.45888e-07	1.64975e-08
9646	-2.53287	-0.487279	-1.88162	0.000488081	0.000113083
9647	3.33776	-2.00368	5.43852	4.43168e-07	1.0334e-08
9659	0.0645169	-4.31267	4.06806	2.1399e-05	1.48418e-06
9662	-3.79665	2.11747	-6.42955	0.000468019	0.000107735
9673	-3.34887	-0.00240728	-3.28148	0.00332141	0.00125906
9708	-3.99216	-1.55562	-2.47571	1.42528e-06	4.55919e-08
9709	-4.27035	-1.47113	-3.20674	3.12585e-05	2.71935e-06
9750	0.163485	-2.61435	3.19024	0.00332141	0.00124792
9758	-4.15761	-2.9249	-1.51755	0.00150893	0.000465987
9773	-0.425942	-4.35293	3.73919	5.19057e-05	5.12074e-06
9774	-1.47244	-3.65866	2.18645	0.000208723	3.2884e-05
9775	3.47974	0.680746	2.7165	0.00683823	0.00323206
9781	-4.10924	-0.328565	-3.29896	0.000800003	0.000206398
9801	1.01146	-0.826537	1.5017	0.000459488	8.84634e-05
9823	1.04445	-0.711662	2.11293	0.00261941	0.000943613
9824	-2.66122	0.921033	-3.76598	0.000808016	0.000215471
9835	-1.26765	-4.16092	2.57254	0.00929455	0.00474036
9838	-3.90305	-1.71629	-1.86704	0.00392006	0.00156451
9845	-4.28328	-0.592329	-3.7849	6.65516e-05	6.92375e-06
9855	-4.63095	-2.08459	-2.54637	0.000800003	0.000206398
9873	-0.974271	0.983803	-2.20556	0.00554818	0.00246475
9881	2.74011	-0.288086	3.21484	0.00929455	0.00474036
9904	3.50279	2.36348	1.59002	0.00637737	0.00290175
9909	-4.60181	-1.41159	-3.08019	7.37217e-07	1.91743e-08
9917	-1.06086	-3.99546	3.20406	7.18998e-09	6.87831e-11
9936	-4.12652	-2.27352	-1.79866	0.00740587	0.00356234
9966	1.14313	3.13875	-2.10602	0.00481175	0.00204697
9972	3.24534	1.48284	1.68753	0.000468019	0.000107735
10002	-4.76349	-2.7085	-2.06447	0.00115432	0.000326797
10004	3.43044	-1.96156	5.38886	0.000468019	0.000107735
10005	-1.43205	-4.40147	3.11254	0.00140771	0.000430942
10033	-1.95015	-4.60055	2.29704	0.00794455	0.00384283
10047	-1.70781	-4.28795	2.47262	0.00140771	0.000430942
10088	-4.46769	-3.10224	-1.48167	0.00545087	0.00241501
10093	-1.80498	-3.74456	2.06799	0.000242612	3.98913e-05
10114	-4.04284	1.55739	-5.11949	0.00219222	0.000768964
10134	0.481843	-4.15201	4.5865	0.00613994	0.00275334
10156	0.36725	-3.27734	3.02934	0.00217462	0.000725744
10160	-0.526156	-4.55779	3.85024	3.32889e-05	2.99551e-06
10199	-1.07621	-3.47838	2.44352	0.00140771	0.000430942
10216	-0.835665	-4.51271	3.17203	0.00219013	0.000754148
10233	2.64505	0.00843252	2.32661	0.00673582	0.00311318
10234	0.539997	-3.44529	3.71065	0.00219013	0.000754148
10274	-4.40409	-2.45088	-1.98442	0.00517332	0.00227038
10275	3.04994	-1.13083	3.3767	0.00786294	0.00378926
10301	4.08852	-0.96981	4.47737	0.00929455	0.00474036
10318	-2.98347	-4.19633	1.83416	0.00786294	0.00378926
10341	-3.66739	-0.534893	-3.11742	0.00499757	0.00216188
10366	-1.29008	2.62033	-3.88551	0.00683823	0.00323206
10405	-4.29034	-1.09494	-2.59016	0.00400011	0.00161679
10469	-4.35441	-2.5866	-2.31113	0.00517332	0.00227038
10493	2.65128	-1.82631	4.51732	0.000122412	1.71999e-05
10516	3.23625	-1.22933	4.48268	3.7042e-08	4.54028e-10
10545	-3.23599	-0.302212	-3.0509	0.00517332	0.00227038
10572	0.341455	-2.31742	2.81059	4.18328e-06	1.96345e-07
10586	-1.11466	-3.82632	2.55809	0.00613434	0.00274165
10589	-0.247797	-4.03424	3.64793	4.39085e-05	4.10862e-06
10592	-4.48494	0.21971	-4.69604	0.000468019	0.000107735
10599	-4.0154	-0.758218	-3.09729	0.0005262	0.000126477
10628	-4.05622	-1.30076	-2.46358	8.11803e-06	4.65967e-07
10633	0.55092	-2.83726	3.38818	0.00161158	0.000515996
10647	0.974183	-3.64754	5.27478	2.56656e-09	1.80507e-11
10649	-2.84702	-4.19712	1.51489	0.00616856	0.00278461
10655	-0.184249	-4.57577	4.49416	7.63318e-06	4.26728e-07
10658	-4.82955	-3.40202	-1.41738	0.00140771	0.000427249
10660	0.475279	-2.93486	3.10841	0.000132377	1.90354e-05
10663	-1.6818	-4.5702	2.91601	0.000468019	0.000107735
10670	-1.6427	-3.6292	1.86297	0.00556795	0.0024752
10672	-4.50614	-2.82602	-1.51969	0.00740587	0.00354355
10676	-4.46626	-1.11796	-3.03681	5.49792e-06	2.66267e-07
10685	1.74214	0.402987	1.5234	0.00388284	0.00153921
10700	-3.90988	0.74819	-4.2805	0.000808016	0.000215471
10721	-1.66231	-4.19548	2.81639	0.000188806	2.85908e-05
10729	-1.75235	-4.9239	3.177	0.00693386	0.00329177
10741	3.64002	2.12631	1.69078	0.00219013	0.000754148
10747	3.38485	-1.88105	4.63471	0.000468019	9.9123e-05
10755	1.93211	-2.76399	3.91308	0.00219222	0.000764049
10765	-4.09854	-0.670579	-3.4957	0.000468019	0.000107735
10790	3.37198	-0.160742	3.39615	3.02947e-06	1.33134e-07
10794	-2.76133	2.13291	-4.92247	0.00740587	0.00356234
10803	-1.03142	-4.53149	3.05146	0.00125028	0.000358452
10805	-1.78747	-4.36094	2.78185	0.000109042	1.28018e-05
10806	-0.54026	-4.36116	3.66133	3.54911e-05	3.21489e-06
10813	-0.429803	-4.12815	3.63475	1.97928e-05	1.3491e-06
10814	0.209518	-4.09251	4.30203	0.000122412	1.71999e-05
10825	0.382417	-3.93232	3.96646	3.02536e-05	2.27919e-06
10837	-3.7564	1.0836	-4.59958	0.00140771	0.000430942
10841	-4.63942	-1.88729	-2.78151	0.00161158	0.000499717
10849	3.32439	-0.330047	3.69317	0.000468019	0.000107735
10851	0.32575	-4.58979	4.14513	0.00219222	0.000773994
10852	2.72989	1.12091	1.76458	0.0006792	0.000168125
10866	-4.17147	0.861612	-4.9019	0.000371184	6.87994e-05
10867	-3.4892	-1.20135	-2.08983	0.00929455	0.00474036
10873	0.476885	-3.14979	2.42488	0.00196954	0.000644147
10881	-4.34368	-2.04411	-2.362	0.000429564	8.15804e-05
10885	-0.0478589	-3.9742	3.83402	7.59716e-07	2.06679e-08
10892	-3.10463	-4.21672	1.68496	0.000273803	4.66729e-05
10894	-0.374764	-4.0692	2.75728	0.00130542	0.000378942
10918	1.18744	-2.88027	3.87757	0.00929455	0.00474036
10933	-2.17825	-4.34111	2.38459	0.000330016	5.79131e-05
10939	-3.78954	-1.9558	-1.71173	0.00115432	0.00032601
10974	2.80162	-0.18583	3.27083	0.000468019	0.000107735
10978	1.26761	-3.12461	4.02605	0.000512944	0.000122371
10996	-0.136907	-3.57216	3.43526	3.18629e-05	2.8005e-06
10997	-2.06698	-4.00284	2.60473	0.00138374	0.000406641
11008	3.41482	-2.16131	5.12586	1.87197e-05	1.26477e-06
11019	1.48747	-2.60958	3.7018	0.000428133	8.0251e-05
11022	3.75095	-2.23429	4.81539	0.00517332	0.00227038
11030	-3.88823	-1.90172	-2.13083	0.00021191	3.43997e-05
11035	-0.935581	-4.42702	3.22342	0.000429564	8.15804e-05
11057	-1.2082	-3.70656	2.24921	0.000226094	3.68374e-05
11066	1.15786	-2.54711	3.59055	0.00337919	0.00131733
11072	1.02198	-3.27577	3.95725	0.00291571	0.00106256
11105	-4.24635	-2.8985	-1.53499	0.00304997	0.00113519
11118	3.50375	1.19371	2.30829	0.000122412	1.71999e-05
11128	-3.34519	-0.0503195	-3.07449	0.00332143	0.00129282
11142	0.300246	-3.70352	4.35167	0.000122412	1.71999e-05
11155	-4.6418	-1.28288	-3.21846	0.00481175	0.00204697
11175	-1.38888	2.49634	-3.93753	0.00929455	0.00474036
11200	-4.57303	-1.01653	-3.45499	2.36914e-05	1.70691e-06
11214	-1.65271	-3.31075	2.12447	0.000371184	6.66023e-05
11243	-4.49451	-3.17606	-1.72999	0.00188421	0.000615676
11253	-0.56601	-2.5973	2.13975	0.000877075	0.00023546
11280	-1.96891	1.6728	-3.73549	0.000468019	9.83191e-05
11307	2.87553	0.555591	2.27171	0.00267188	0.00096731
11309	1.73833	-3.93379	5.4268	0.00140771	0.000430942
11318	-0.769993	2.34552	-3.2988	0.00332143	0.00129282
11330	-4.55079	-1.59356	-2.69581	6.54393e-05	6.74934e-06
11343	-4.04701	-1.29547	-2.52992	0.00332141	0.00125906
11349	-0.745546	-3.96842	3.22287	0.000468019	0.000102823
11376	-1.65872	2.68278	-3.98421	0.00115432	0.000326797
11384	-4.51733	0.986827	-4.88688	0.00404941	0.00165608
11386	0.00840639	1.44084	-1.5816	0.00140771	0.000430942
11418	0.0933893	-1.11001	1.41272	0.00332143	0.00128011
11421	-0.669653	2.82556	-3.7549	0.00740587	0.00356234
11471	2.80136	-1.64456	4.61709	8.721e-09	8.60368e-11
11476	3.45834	1.4288	1.92247	0.00731426	0.00347892
11481	-2.15132	-3.77578	2.10094	0.00241747	0.000862196
11513	-4.24938	-1.98859	-2.0137	0.00525476	0.00231712
11531	0.787446	-3.23787	3.94856	0.00683823	0.00323206
11534	-0.959213	-3.89501	2.9516	3.80144e-07	7.38696e-09
11554	3.23044	-1.64803	5.02296	9.52483e-05	1.08774e-05
11575	-4.30025	-2.09308	-1.94107	0.000641895	0.000156972
11596	-3.10594	-4.16455	1.40948	0.00487438	0.00207507
11614	-1.09847	-4.45318	3.39586	1.68445e-06	6.69751e-08
11617	-4.91653	-2.36193	-2.49257	0.000297466	5.16676e-05
11624	-0.200849	-4.37084	3.71301	1.04152e-06	2.98911e-08
11626	0.258586	-4.2259	4.23851	1.22595e-09	7.69657e-12
11632	2.95138	-1.55033	4.42577	3.12585e-05	2.71935e-06
11633	1.10439	-2.23309	2.97705	0.00115432	0.000326797
11635	-0.330066	-2.167	2.43806	0.00861004	0.00423117
11641	3.33053	-1.32395	4.65353	0.000122412	1.71999e-05
11642	3.33879	-3.02	6.32869	1.68445e-06	6.65668e-08
11647	-0.366656	-2.15624	1.83833	0.00613994	0.00275334
11648	1.31837	-1.60901	2.93928	0.000251705	4.22142e-05
11649	-0.612584	-3.34421	2.65793	4.1548e-05	3.84781e-06
11650	-2.12457	-4.05574	1.80826	0.000482319	0.000111315
11651	-0.773083	-3.42512	2.14506	0.00618971	0.00279884
11675	-4.40001	-2.65551	-1.78699	1.21464e-05	7.40766e-07
11685	-4.13868	-1.66612	-2.31563	0.001375	0.000403661
11691	-1.13398	-3.96477	2.58621	0.00404941	0.00165608
11692	-2.07039	1.39667	-3.37888	0.001375	0.000403661
11693	-2.62265	-0.0317486	-2.65157	0.000808016	0.000215471
11699	0.725487	-4.38772	5.00449	8.11803e-06	4.65967e-07
11705	-4.71294	-1.43863	-3.15674	1.42528e-06	4.55919e-08
11768	-3.70267	0.278915	-3.47605	0.00817911	0.00396607
11799	-4.78252	-0.545336	-4.69252	0.0005262	0.000126477
11847	-1.69007	1.50469	-3.30415	0.000800003	0.000205683
11855	-3.86625	2.92399	-6.55225	0.00021191	3.43997e-05
11939	2.22172	-3.74199	5.30069	0.00332143	0.00129282
11976	-4.35049	-0.920326	-2.76415	2.43014e-06	1.00983e-07
11979	-3.49898	-0.411666	-3.08731	0.00673582	0.00311318
11980	-3.97292	-1.42001	-2.83009	0.00929455	0.00474036
11982	-4.56954	-0.618551	-3.87425	0.000468019	0.000107735
11985	-4.73724	-2.52974	-2.23162	0.000371184	6.87994e-05
11986	3.36524	-1.55708	4.71794	1.29145e-05	8.06917e-07
12002	-4.3421	-1.5905	-2.51193	0.000468019	0.000107735
12030	-4.50753	-2.80099	-1.53076	0.00166568	0.000533813
12078	2.47646	-2.34397	4.54713	0.000808016	0.000215471
12089	-1.70769	1.25814	-2.96583	0.000188806	2.85908e-05
12114	4.27553	0.211016	4.5223	0.00481175	0.00204697
12118	-0.387068	-2.39592	1.77929	0.00180313	0.000581099
12124	3.35095	0.188438	2.70661	0.00332143	0.00129282
12125	-3.58899	0.264678	-3.7407	0.0090471	0.00450868
12129	4.38146	2.60387	2.02373	0.00404941	0.00165608
12155	-3.24683	1.40402	-4.80497	1.68445e-06	6.65668e-08
12158	-3.96953	-1.29938	-2.70245	0.000258402	4.38009e-05
12159	-1.06275	1.89944	-2.89784	0.00683823	0.00323206
12184	-3.66453	0.604025	-4.20381	0.000726396	0.000182196
12195	3.2288	-0.717272	3.92811	0.000800003	0.000206398
12199	2.22818	-2.25786	4.27778	0.000304474	5.31579e-05
12206	1.7578	-1.91719	3.13401	0.000957414	0.000258575
12208	1.52756	-0.825203	2.10398	0.00401426	0.0016309
12228	1.99437	-3.1471	4.18671	0.000800003	0.000205683
12237	2.19941	-1.05905	2.99452	0.00481175	0.00204697
12274	-4.29899	-1.48697	-2.88568	0.00295647	0.00108014
12281	3.51203	-1.86749	5.46664	0.000808016	0.000215471
12297	0.485459	-2.18313	2.42853	0.00241747	0.000862196
12301	3.93765	0.289458	3.93196	0.00127666	0.000369831
12303	-5.70766	-3.59827	-2.10789	0.00683823	0.00323206
12316	-0.871148	-3.82333	2.48499	0.00905157	0.00451902
12318	-4.66343	-2.92091	-1.64591	0.0087996	0.00435113
12320	-4.48894	-2.89177	-1.53561	0.00185429	0.000605346
12349	-4.46907	-1.29683	-2.83788	0.000468019	0.000107735
12353	-1.48769	-3.95112	2.55769	2.09566e-05	1.44723e-06
12360	0.251692	-3.16736	3.13423	0.00533855	0.00236365
12366	-3.8859	2.5025	-4.48422	0.000165306	2.43634e-05
12381	2.01106	0.123828	2.37273	0.00161158	0.000515996
12458	0.257737	-4.34926	4.45872	0.00125028	0.000358452
12478	-5.19237	-2.47076	-2.6853	0.00332143	0.00129282
12479	-4.66567	-2.81083	-1.66785	0.00210519	0.000691032
12490	-4.3712	0.695435	-4.61158	0.000122412	1.71999e-05
12491	-3.91658	-0.27872	-3.58794	0.00115432	0.000326797
12541	-2.1679	-4.44182	2.34382	0.00794455	0.00384283
12550	-1.9547	-4.77369	2.89649	0.00929455	0.00474036
12551	0.802487	-4.01529	4.50225	1.87197e-05	1.26477e-06
12625	-0.288885	2.17388	-2.59152	0.00929455	0.00474036
12628	-2.21815	-4.2845	1.84739	0.00203445	0.000665986
12638	-4.20432	2.0674	-6.21898	0.000122412	1.71999e-05
12641	-4.65607	-2.56457	-2.22194	0.00140771	0.000430942
12648	2.1834	-1.84339	3.81969	0.00786294	0.00378926
12661	-4.56141	-0.0943599	-4.34875	0.00332143	0.00129282
12672	-0.120516	-3.94058	3.65497	0.00219222	0.000773994
12678	-4.55188	-2.1106	-2.33227	0.000247689	4.13926e-05
12679	-4.7069	-1.28593	-3.14758	0.00861004	0.00423117
12682	2.01589	-2.75426	4.77015	0.00150893	0.000465987
12703	-3.09661	0.193111	-3.24732	0.00219222	0.000773994
12715	-2.11227	-3.70635	1.69068	0.00291571	0.00106256
12745	-0.396594	-3.03596	2.64729	0.000658473	0.000162207
12746	0.840594	-3.25787	4.21777	4.27654e-08	5.62535e-10
12752	-2.47861	-4.23043	1.97428	0.00388284	0.00153921
12763	-1.6833	-3.90715	2.16528	0.00219013	0.000754268
12776	-1.93207	-4.53192	2.59985	0.00219222	0.000773994
12778	-2.88431	-4.91029	2.27085	0.000657446	0.000161757
12779	-1.05012	-3.4796	2.46015	0.00140771	0.000430942
12785	3.59701	-0.859866	4.41783	3.12585e-05	2.71935e-06
12793	-4.64461	-3.02194	-1.61519	0.000808016	0.000215471
12810	-4.35349	0.263988	-4.34567	5.97484e-07	1.46468e-08
12813	-4.71753	-0.827585	-3.64844	7.59684e-05	8.10783e-06
12814	-2.24055	-0.140865	-2.13119	0.00872188	0.00430227
12824	-3.8241	-2.03388	-1.93564	0.00343597	0.00134871
12835	1.64467	-4.30657	5.76453	3.02947e-06	1.33134e-07
12842	-1.24413	-3.40974	2.42195	0.0005262	0.000126477
12854	-4.58113	-2.19612	-1.94624	0.00230376	0.000818883
12864	-1.33402	-3.44493	1.85056	0.00371019	0.00146411
12866	0.313993	-3.0591	3.215	0.00107938	0.000297837
12956	-4.00396	0.433753	-4.74801	0.000468019	0.000107735
12960	-2.65949	-0.0788639	-2.0751	0.00580606	0.00258799
12998	1.62659	-2.61859	4.11437	0.000468019	0.000107735
13001	0.209115	-2.50716	2.15369	0.00740587	0.00354355
13023	3.85347	-0.913104	4.23412	0.000627988	0.000153195
13033	-3.86822	0.671381	-4.45093	5.33502e-05	5.43869e-06
13038	1.84334	-3.40107	4.97399	1.77919e-06	7.23377e-08
13049	-3.87678	-1.61404	-2.21176	0.00301494	0.00110503
13067	-4.62127	-1.60811	-3.53278	2.22607e-08	2.46232e-10
13077	3.09505	-1.87721	4.39066	0.00673582	0.00311318
13081	4.13657	-0.703896	4.54984	0.000468019	0.000107735
13082	4.32792	-1.8575	5.91485	3.12585e-05	2.71935e-06
13091	-4.14991	-1.1533	-2.87545	0.000468019	0.000107735
13127	1.53035	-1.0524	2.558	0.00469222	0.00194282
13157	-3.55345	-0.39034	-3.06691	0.000468019	0.000107735
13179	-0.417051	-2.1222	1.62987	0.00861004	0.00423117
13180	0.587524	-2.9588	3.22575	0.000800003	0.000206398
13183	-0.369195	-3.35166	3.17932	0.0010109	0.000277431
13185	0.259802	-2.98349	2.96558	7.92816e-05	8.53255e-06
13186	2.33088	-1.36207	3.81788	9.52483e-05	1.08774e-05
13243	-3.82103	-2.10495	-1.53919	0.00342156	0.00133691
13250	-1.33464	-4.33928	3.11038	0.00929455	0.00474036
13269	-1.0975	1.83947	-3.22695	0.00481175	0.00204697
13278	-0.666616	-3.17759	2.51097	0.00481175	0.00204697
13299	1.079	-2.12797	3.28201	0.00673582	0.00311318
13301	-1.18649	-4.80417	3.47267	0.00683823	0.00323206
13304	1.57292	-2.0167	3.72643	0.00127666	0.000369831
13310	3.52851	-3.01648	6.12109	0.00021191	3.43997e-05
13323	-3.47484	2.44361	-4.80116	0.000800003	0.000206398
13326	2.94657	-1.73472	4.68129	5.49792e-06	2.66267e-07
13345	-4.49258	-2.22617	-1.78844	0.00217462	0.000727475
13379	-4.17497	1.85544	-5.80543	0.000468019	0.000107735
13394	1.49518	3.32519	-1.61661	0.00400011	0.00161679
13408	-0.898052	-4.04725	3.32747	3.24069e-06	1.43385e-07
13409	-0.198474	-4.10178	4.86622	0.00219013	0.000754148
13449	3.82753	0.972129	2.85541	0.00219013	0.000754148
13455	-1.5257	-3.82558	2.36984	3.14834e-09	2.44714e-11
13468	-4.3021	-2.53262	-1.85268	0.00481175	0.00204697
13486	0.56903	3.60905	-2.68022	0.00115432	0.000326797
13498	-1.89235	1.07528	-2.83552	0.00161158	0.000515996
13517	-3.65739	-1.47053	-1.97704	0.00740587	0.00356234
13522	0.629993	-2.43827	3.64395	2.01847e-07	3.63538e-09
13523	3.93937	2.56962	2.07111	0.00400011	0.00161679
13526	3.17025	-0.337712	3.75379	0.000468019	0.000107735
13551	-4.59379	-2.72196	-1.80237	0.00861004	0.00423117
13563	0.0642324	-3.54054	3.60477	0.00861004	0.00423117
13565	0.151757	-3.91738	4.17426	0.000175052	2.61139e-05
13577	-0.376379	-4.27273	3.86432	0.000468019	0.000107735
13578	-2.98795	-4.63062	1.71873	0.0090471	0.00450868
13579	-1.3354	-3.83094	2.02691	0.00219222	0.000762536
13584	-1.35204	-4.29503	2.48176	9.5776e-05	1.09663e-05
13593	-0.475313	-3.93558	3.51341	0.000468019	0.000107735
13598	3.38404	-0.160205	3.5318	0.00219222	0.000773994
13603	2.62325	-0.530344	2.95088	0.00731426	0.00347892
13613	0.618351	-2.12124	2.50701	0.00400929	0.00162529
13618	-4.87255	-0.151245	-4.78143	3.12585e-05	2.71935e-06
13622	-4.3589	0.0531664	-4.35747	1.85434e-10	8.86977e-13
13628	2.01047	3.67756	-1.86201	0.00616856	0.00278461
13661	0.154427	-2.88398	2.87209	0.00217462	0.000727475
13678	-3.01084	-0.677123	-2.09006	0.00239714	0.000852794
13680	-4.58332	-2.0691	-2.51184	0.00329103	0.00122983
13690	3.60576	1.25458	2.35118	0.000808016	0.000215471
13707	3.61339	-0.23342	4.03361	3.42771e-06	1.55758e-07
13708	2.11536	-1.78749	3.56437	0.00261941	0.000938312
13709	-0.096182	-2.89239	2.86661	0.00361663	0.00142503
13710	-4.77537	-3.22344	-1.51932	0.000509791	0.000118599
13726	-0.358453	-1.72274	1.63205	0.000512944	0.000122371
13727	0.729482	-3.08977	3.38107	0.000800003	0.000206398
13731	0.938922	-1.12397	3.15273	0.00616856	0.00278461
13738	-3.15892	2.11764	-5.01813	0.00332143	0.00129282
13741	0.612028	-2.34777	2.79479	0.00335181	0.00130565
13762	-2.18072	-4.11473	1.85657	0.000276956	4.73599e-05
13763	-1.57823	-5.12971	3.82985	3.32889e-05	2.9871e-06
13781	-4.36835	-2.67759	-1.93232	0.00037024	6.57466e-05
13793	-2.55535	-4.39242	1.86188	0.00331682	0.00124244
13797	-1.21663	-3.02872	1.83446	0.00469222	0.00194282
13805	-4.07383	-1.27645	-2.85534	0.00140771	0.000430942
13811	2.03762	-1.44323	3.19804	0.000122412	1.71999e-05
13812	1.25411	-0.905615	2.21482	0.00683823	0.00323206
13817	3.34056	-1.30268	4.11283	1.72554e-11	4.12684e-14
13818	2.36126	-1.04498	3.70052	0.000122412	1.71999e-05
13819	2.53971	0.202871	2.22556	0.0090471	0.00450868
13829	-4.8142	-2.2799	-2.258	0.000958547	0.000261057
13848	-4.44417	0.60588	-4.99153	0.000468019	0.000107735
13864	2.63177	0.131221	2.50055	0.000371184	6.87994e-05
13886	0.692376	-1.8636	2.55598	0.00400011	0.00161679
13887	-0.912604	-3.45717	2.03691	0.00947442	0.00484059
13891	1.21866	2.63972	-1.42938	0.00934401	0.00477117
13907	-3.0862	2.4175	-5.25418	3.12585e-05	2.71935e-06
13926	-4.26788	-2.67019	-1.777	0.00263975	0.000952519
13927	0.155675	-1.90986	3.54331	0.00125028	0.000358452
13952	3.372	-0.0912436	3.24569	0.000468019	0.000107735
13954	2.61008	0.966067	1.81145	0.00161158	0.000515996
13967	2.43702	0.517384	2.20778	0.000371184	6.87994e-05
13982	1.43984	-0.318649	1.53258	0.00646736	0.00294656
13996	3.16176	0.752779	2.46322	3.12585e-05	2.71935e-06
14013	-3.78175	-1.03934	-2.61691	0.00219222	0.000768964
14018	-3.98982	-1.00493	-2.99411	0.00021191	3.43997e-05
14042	1.15344	3.03265	-1.77058	0.00140771	0.000416109
14043	-1.19338	0.976868	-2.69421	0.000800003	0.000206398
14056	-4.56404	-0.671022	-3.94512	9.89783e-08	1.59786e-09
14063	-0.14308	2.01215	-2.22032	0.00303057	0.00111619
14086	-3.52105	-1.5879	-2.80713	0.000516782	0.000123595
14089	3.09918	1.30863	1.85008	0.00261941	0.000938312
14097	-1.75785	-0.0722877	-1.9988	0.00799184	0.00387049
14103	3.35327	-1.94674	4.81885	0.000468019	0.000107735
14111	-3.4841	1.2924	-4.44976	0.000371184	6.87994e-05
14113	0.0362847	-2.72686	2.41706	0.00738196	0.00351333
14137	-4.45329	-3.00532	-1.66624	7.24409e-05	7.60142e-06
14138	-4.46555	-1.54411	-3.17234	0.00481175	0.00204697
14142	1.89969	-2.45621	4.46024	0.000122412	1.71999e-05
14146	0.851926	-2.42509	3.00714	0.00332141	0.00125906
14169	-3.70107	0.648875	-4.22427	5.33502e-05	5.43869e-06
14170	-1.08766	2.52927	-3.36495	3.12585e-05	2.71935e-06
14187	-4.15269	-1.48306	-2.65893	8.35284e-07	2.29734e-08
14209	-2.76395	-4.30605	1.57493	0.00140771	0.000430942
14221	1.44056	-0.380276	2.24897	0.00929455	0.00474036
14231	-0.143883	-3.95248	3.58797	4.64754e-05	4.45997e-06
14238	-4.58335	-1.99724	-2.76985	0.000122412	1.71999e-05
14243	-4.57717	-1.3079	-3.04466	0.00404941	0.00165608
14267	0.876873	-2.91272	3.50413	0.00392006	0.00156451
14276	-3.29738	-4.7528	1.93185	0.00444451	0.00182564
14295	-4.69776	0.38164	-4.68604	2.53998e-08	2.88548e-10
14298	-3.70378	-1.66673	-2.43353	0.00857102	0.00415868
14305	-4.78201	-3.15558	-1.46323	0.000657446	0.000161757
14311	2.01072	-1.27358	3.10658	0.000468019	0.000107735
14345	-4.53031	-3.49783	-1.48884	0.00217462	0.000725744
14382	-0.67279	-3.44357	2.92707	0.000468019	0.000107735
14400	3.40014	-0.0535472	3.54099	0.0090471	0.00450868
14406	-0.417479	-2.64875	2.9066	5.33502e-05	5.43869e-06
[truncated: 435 more rows]

## Sheet: 030
dmr_id	median1	median2	median_change	padj	pval
[truncated: 3,036 more rows]

## Sheet: 031
dmr_id	median1	median2	median_change	padj	pval
[truncated: 2,849 more rows]

[truncated: 4 more sheets: 050, 052, 054, 061]
