# Supplementary material for: Global hypo-methylation in a proportion of glioblastoma enriched for an astrocytic signature is associated with increased invasion and altered immune landscape
Source: eLife journal article supplement (doi:10.7554/elife.77335), 2022-11-02
Supplement: fig1-data1 [file Figure1A_1H_dmr_res_specific.xlsx]

## Sheet: 017
dmr_id	median1	median2	median_change	padj	pval
140	-5.30915	-2.08437	-2.5397	0.00127127	0.000511237
184	1.17182	-3.82049	4.98596	2.06859e-05	2.71935e-06
198	-3.8002	-0.385625	-3.10173	0.0020837	0.000919953
330	-4.31625	-2.12222	-1.6599	0.00127127	0.000514208
445	-4.48689	-2.48979	-1.94284	0.000151871	3.3324e-05
448	-3.38587	-1.473	-2.15395	0.001447	0.000591974
565	-4.80148	-3.16808	-1.72232	0.00948744	0.005695
569	-4.66266	-0.778602	-4.00489	6.32148e-11	5.41599e-13
639	-4.39085	-2.83638	-1.40993	0.0021193	0.000938312
715	-4.03802	-1.90229	-1.82314	0.00946662	0.00564155
1051	-3.70827	-2.10362	-1.57244	0.000595288	0.000205159
1087	-4.723	-2.07563	-2.1376	0.000748032	0.000270173
1269	-5.54498	-2.58665	-2.93244	0.000243862	5.79131e-05
1339	-3.0256	-0.403711	-2.26655	8.19568e-05	1.36266e-05
2096	-2.02264	1.70768	-4.28981	0.00638759	0.00354355
2251	-4.22652	-2.85514	-1.56185	0.000374761	0.000118599
2574	-5.06582	-3.03636	-2.16231	0.00784331	0.00450868
2632	-4.06617	-2.24516	-1.71238	0.000344513	0.000102428
2714	-4.59368	-2.9026	-1.62904	0.00629848	0.00347892
2751	-4.02481	-2.51054	-1.4178	1.40544e-06	8.9557e-08
2800	-4.27448	-2.64651	-1.65877	3.6886e-05	5.30328e-06
2819	-2.85424	-1.17109	-1.68982	0.0071676	0.00402422
2921	-3.37948	-0.639299	-2.73816	0.00175526	0.000754268
3000	-4.0524	-1.38529	-2.3825	3.44016e-05	4.76188e-06
3882	-4.24672	-2.66724	-1.53913	9.41694e-05	1.96155e-05
3943	-3.70042	-1.06704	-2.24368	0.000240727	5.67175e-05
4022	-4.23387	-0.724503	-3.08906	0.000149915	3.26322e-05
4024	0.761061	-2.43077	3.22797	6.72633e-05	1.07376e-05
4066	-4.13117	-2.48696	-1.727	0.00382827	0.0019126
4691	-4.27191	-2.41217	-1.7916	0.000149915	3.26322e-05
5269	-4.32639	-2.92797	-1.45495	0.00946662	0.0056438
5531	-3.07654	0.075352	-3.2596	0.00587433	0.00323206
5861	-4.38352	-2.26916	-2.5046	5.54706e-07	2.58417e-08
6185	-3.60899	-2.0716	-1.59362	0.000306374	7.62859e-05
6233	-3.76293	-2.08361	-2.12377	0.001447	0.000591974
6236	-3.6174	-0.982845	-2.1185	0.00949078	0.00570463
6962	-4.08016	-2.30421	-1.85619	0.000268482	6.41913e-05
6980	-2.96008	0.521702	-3.69859	0.000982446	0.000369831
7035	-0.623783	2.35363	-3.10106	0.000606012	0.000215471
7085	-4.49297	-2.86986	-1.83315	0.00147284	0.000607276
7111	-5.21693	-3.56476	-1.86115	0.00946662	0.00564155
7212	-3.85817	-1.91713	-2.04265	3.88055e-06	2.87795e-07
7213	-3.78682	-2.24343	-1.76884	0.00544078	0.00290175
7398	-0.00735981	-3.45002	3.33507	0.000590154	0.000199246
7426	-3.87966	-2.6626	-1.47715	0.00885767	0.00521262
7859	-4.88964	-2.9109	-2.05043	0.000880655	0.000326797
8067	-4.14478	-2.33165	-1.68124	6.48955e-09	1.0425e-10
8565	1.96168	3.11092	-1.52448	0.00587433	0.00323206
8743	-0.929574	-4.40778	3.26223	7.4084e-05	1.20597e-05
8949	-3.98185	-2.37551	-1.5984	2.33656e-06	1.60775e-07
8950	-3.37404	-1.29784	-1.65129	0.00931851	0.00550877
8965	-3.48724	-1.87036	-1.50945	0.00323916	0.00156451
9298	1.32329	3.31916	-1.57846	0.00462329	0.00241501
9304	1.01595	-4.2002	4.99735	0.00106249	0.000403661
9387	-4.05539	-2.31206	-1.66217	5.09288e-05	7.66318e-06
9481	-5.33199	-3.38803	-1.80026	0.000221052	5.16676e-05
9572	-5.69709	-3.28818	-2.27966	0.000359154	0.000113083
9726	-4.18498	-2.63366	-1.52976	0.00059258	0.000200383
10194	-4.4026	-2.55483	-1.83809	8.48633e-05	1.71999e-05
10264	-4.88601	-3.40016	-1.48194	0.00857273	0.00502658
10539	-4.02977	-1.83818	-2.13541	0.00110018	0.000427249
10591	-3.74979	-2.1494	-1.48272	0.00852478	0.00498934
10840	-4.13203	-2.66234	-1.93254	0.000590154	0.000199246
10938	-4.20284	-2.29793	-1.76135	0.0021356	0.000951444
11004	-3.99996	-2.55296	-1.65968	0.00173618	0.000727475
11071	-4.28326	-2.61348	-1.51348	0.00629848	0.00347892
11219	-4.37489	-2.52776	-1.79985	1.08099e-06	6.65668e-08
11297	-4.19185	-2.15512	-1.77094	1.42933e-06	9.14631e-08
11749	-4.4258	-2.72486	-1.70093	5.30346e-05	8.10783e-06
11891	-4.22373	-2.53515	-1.68858	0.00744741	0.00423117
12007	-4.21288	-1.74411	-1.95585	0.00325718	0.00157583
12705	1.56374	3.19496	-1.61086	0.000151871	3.43997e-05
12875	-3.46076	-2.31325	-1.40627	0.0051389	0.00269259
13064	-4.39042	-2.16936	-2.00431	0.00401969	0.00204697
13134	-1.80073	-4.33792	2.80026	3.9209e-06	2.94986e-07
13154	-3.84021	-2.05204	-1.74803	0.00437332	0.00227035
13639	-2.25224	2.11305	-3.72178	0.00587433	0.00323206
13761	-3.84687	-2.23462	-1.58836	2.18703e-07	7.36754e-09
13779	-4.16812	-1.10532	-2.80135	9.19758e-05	1.90354e-05
13852	-4.46377	-2.97986	-1.47209	0.00526076	0.00278461
14124	-4.05038	0.705778	-4.76039	9.77262e-13	3.1398e-15
14189	1.96892	2.86811	-1.48004	0.00452729	0.00236365
14613	-4.04989	-2.22825	-1.67644	0.00011775	2.49688e-05
15136	-2.67859	1.81506	-4.13523	6.01657e-08	1.72362e-09
15153	-3.85633	-1.50457	-2.35319	7.25494e-05	1.17905e-05
15184	-4.33355	-1.92971	-2.47058	0.000344513	9.8906e-05
15190	-4.01463	-2.32648	-1.83621	0.00177728	0.000768964
15358	-0.0339071	-3.44298	2.82072	0.0018718	0.000818883
15374	-4.33572	-2.71543	-1.62029	0.00685761	0.00384283
15571	-1.53886	-4.062	3.0753	4.21779e-05	6.25611e-06
15614	-4.97811	-3.60105	-1.46468	0.0020837	0.000919953
15731	0.68036	2.30491	-1.73682	0.00946662	0.00564155
16133	-3.2694	-0.542322	-2.3872	0.00177899	0.000773994
16158	-3.35989	-2.08967	-1.47683	0.00946662	0.00564155
16293	-4.16597	-2.80197	-1.66353	0.00895136	0.00528693
16527	-3.73061	-2.51092	-1.46702	0.00416248	0.00212414
16818	-3.99858	-0.938407	-3.17565	2.06859e-05	2.71935e-06
16850	-3.88017	-0.933227	-2.93746	0.00577344	0.00311318
17104	0.588452	-4.11912	4.67733	1.22623e-08	2.46232e-10
17273	-4.85676	-2.40259	-2.15494	0.00142415	0.000581099
17399	-4.17471	-2.00847	-1.98646	0.00677819	0.00378926
17526	3.3331	1.4235	1.9096	0.00744741	0.00423117
17770	-3.75968	-1.26275	-2.38077	0.00148935	0.000615676
17954	-3.27901	-1.2145	-2.17701	1.57028e-05	1.68373e-06
18781	-4.39106	-3.0572	-1.43673	0.00812167	0.00474036
18890	-4.05243	-1.36103	-2.79813	1.00302e-07	3.19571e-09
19060	-3.73892	0.328565	-3.72002	6.34338e-07	2.98911e-08
19229	-4.29821	-0.163026	-4.05307	1.08099e-06	6.65668e-08
19258	-4.56203	-3.52764	-1.62808	8.48633e-05	1.57213e-05
19811	-1.93249	-3.93747	2.41454	0.00146213	0.000601687
19877	-4.88087	-0.9849	-3.75677	8.48633e-05	1.71999e-05
19878	-4.09503	-1.04043	-3.20511	8.48633e-05	1.71999e-05
19881	-3.7345	-0.408292	-3.10507	0.00127127	0.000511237
19882	-4.44059	-0.0943791	-4.23701	0.0027073	0.00125906
19922	3.77295	0.873495	3.10643	5.6838e-08	1.59786e-09
19997	-3.80972	0.336909	-3.78768	0.00325718	0.00157583
19998	-3.9234	-0.400538	-3.44142	2.12907e-07	7.01139e-09
20344	-4.37196	-0.344683	-3.2649	9.93088e-06	1.00239e-06

## Sheet: 018
dmr_id	median1	median2	median_change	padj	pval
1	0.18918	2.77628	-1.96312	0.00570035	0.00451305
32	1.19902	2.64501	-1.41103	5.34314e-05	2.53262e-05
45	0.60548	1.95718	-1.54462	2.10151e-05	8.93724e-06
169	-1.10422	-3.79556	2.6249	0.000454002	0.000274392
339	-0.496482	-3.40875	1.87855	0.00438939	0.00339354
359	0.116764	-3.79438	3.69866	0.000204987	0.000112745
487	-1.00101	-3.79672	3.09055	2.23035e-06	7.39602e-07
551	-0.0816467	-4.47112	4.38103	3.75217e-11	2.04872e-12
552	0.65783	-3.95294	2.98909	0.00542884	0.00426999
564	0.571784	-3.73646	3.63193	3.43594e-09	3.57422e-10
566	0.0541355	-3.8613	3.94277	2.29139e-08	3.32734e-09
596	1.26675	-4.38963	5.10546	1.97274e-09	1.74107e-10
597	1.40089	-5.10588	6.62779	2.23035e-06	7.39602e-07
598	0.869916	-4.26605	5.29374	2.23035e-06	7.39602e-07
861	0.42975	-2.72304	3.58755	0.000315049	0.000180695
965	2.4754	0.233541	2.15892	0.00117321	0.000794384
970	-0.732262	-3.83225	2.94714	6.86465e-07	1.68022e-07
1034	3.22788	-0.679291	3.69375	2.23217e-07	4.98547e-08
1039	-1.75397	-4.13148	2.77565	0.000163292	8.68536e-05
1042	-1.44432	1.85454	-3.71329	0.000276573	0.000156664
1043	-4.84538	-3.86229	-1.67214	0.00344073	0.00260423
1213	-0.0542189	2.07021	-2.24556	2.37625e-06	7.94135e-07
1242	0.189934	2.35071	-1.97908	0.000595534	0.00037128
1246	0.575489	2.15447	-1.57898	0.00691126	0.00555959
1299	1.29817	2.74878	-1.45114	0.000988812	0.000656027
1301	-1.35221	-4.01568	1.98115	0.000274455	0.000154765
1442	1.77598	-1.34231	2.15749	0.000191986	0.000104962
1472	1.91571	-1.79059	2.39015	0.00100052	0.000667073
1507	0.308976	-2.51546	2.56049	0.00713042	0.005761
1578	-1.03641	-3.64871	1.74054	0.00034453	0.000200037
1936	-1.3861	-4.21209	2.70335	1.01106e-07	1.75848e-08
1969	-1.74483	-4.53939	1.87769	0.000170725	9.10478e-05
2137	-0.244015	-4.31571	3.85044	7.21032e-10	5.80356e-11
2174	-0.00357168	-4.02885	2.73385	0.000448905	0.000268667
2217	-3.289	-0.878425	-2.1609	0.000608029	0.000379499
2241	1.17148	3.88754	-2.4194	0.00301845	0.00224768
2257	-1.63116	-3.92468	1.65674	0.00990073	0.00823002
2406	1.49756	3.13408	-1.70322	1.96946e-05	8.17635e-06
2464	0.633996	-2.16701	3.15543	8.26937e-06	3.16645e-06
2465	-0.123784	-3.9968	2.43178	1.55925e-06	4.22382e-07
2522	-4.45764	-2.82117	-1.7613	0.00542884	0.00426675
2619	-0.135025	-4.60856	4.25149	2.23035e-06	7.39602e-07
2620	1.70339	-4.29344	5.15389	0.000774659	0.000495534
2621	-0.662571	-3.87631	3.56063	0.00200096	0.00143261
2625	-1.94114	-4.27489	1.92432	0.00111468	0.000747408
2630	-0.0584228	-2.00469	2.48234	0.000361351	0.00021278
2653	-4.66265	-2.90126	-1.48754	0.0019888	0.00141168
2756	0.483103	2.04814	-1.60067	6.15943e-06	2.2759e-06
2947	2.5165	3.93057	-2.27981	0.000668653	0.000421272
2995	-2.56905	-3.77977	1.50494	0.00387337	0.00298365
3077	-2.13552	-4.33846	2.1931	0.00263454	0.00194382
3136	-4.32506	-1.65089	-1.98795	0.00691126	0.00555959
3201	-0.147609	1.91333	-1.61543	0.00948413	0.00786587
3225	-1.14844	-3.9629	2.72958	2.1426e-08	2.70284e-09
3249	-5.22297	-3.71727	-1.741	0.00086129	0.000557234
3326	1.67554	3.1555	-1.47997	0.00309028	0.00231643
3357	0.203702	-3.57934	2.88127	1.27723e-08	1.49395e-09
3516	2.89627	2.08996	2.20756	0.00529918	0.00416177
3556	0.675607	-3.84723	2.48234	0.00317983	0.00239179
3755	-0.969809	-3.89297	3.14122	4.74948e-05	2.20016e-05
3757	-1.17602	-4.02103	2.79701	9.76134e-05	4.95534e-05
3797	-4.75261	-2.35013	-2.46879	2.97154e-12	1.20988e-13
4091	-3.15408	-4.92131	1.83695	0.000256617	0.000144222
4196	-0.742584	-3.47126	2.15817	2.72449e-05	1.18623e-05
4219	1.0749	-2.17214	2.3431	1.0129e-06	2.59601e-07
4313	2.4059	-1.21095	2.71057	7.96071e-06	3.04452e-06
4334	-4.73493	-2.33408	-3.36303	1.22967e-05	4.8359e-06
4436	-1.026	-3.69471	2.53444	0.000297667	0.000170095
4463	2.64499	1.2905	1.47311	3.13597e-05	1.40524e-05
4487	0.753158	2.60729	-1.75323	0.000454038	0.000274945
4576	-0.875762	-3.95334	3.23074	0.000190873	0.000104264
4597	-0.918571	-3.58418	2.62866	0.00823353	0.00674339
4605	-0.521514	-2.51252	1.85761	0.000329709	0.000189424
4748	-0.956115	-4.54223	3.35158	2.30601e-06	7.69575e-07
4749	-0.940392	-3.93101	2.56335	0.000988812	0.000656027
4801	0.216032	-4.18898	2.75074	3.40464e-06	1.17948e-06
4811	-4.17058	-2.74472	-1.75206	0.00615766	0.00489307
4897	-1.46634	-3.27005	1.41303	0.00757468	0.00614496
4924	0.480931	-4.84463	4.51814	9.76134e-05	4.95534e-05
4962	-0.923029	-4.36837	3.08211	3.43594e-09	3.57422e-10
4980	0.927476	2.62231	-1.66086	5.03011e-05	2.36175e-05
5119	-0.42082	-3.1403	2.60206	4.90139e-10	3.749e-11
5168	-4.66372	-2.63406	-1.92726	0.00117321	0.000794384
5171	2.2197	-0.448763	2.79241	8.75451e-07	2.22932e-07
5265	-2.77836	-4.67154	2.12531	1.19843e-07	2.10691e-08
5280	-5.01556	-3.34738	-1.5748	0.000675347	0.000425648
5307	0.098527	2.79074	-2.69222	0.00570035	0.00451305
5400	0.0456341	-2.83775	2.66545	1.89744e-05	7.83715e-06
5406	-4.61678	-2.74624	-1.78498	5.68041e-07	1.36496e-07
5441	0.0397456	1.90658	-1.50691	0.00309028	0.00231643
5491	-1.91774	-4.02936	2.33055	0.000595534	0.00037128
5557	2.53828	1.15322	1.42517	0.000190873	0.000104264
5679	1.29182	2.41719	-1.55211	0.000190873	0.000104264
5745	0.0627314	2.1211	-1.66936	0.00713042	0.00576106
5844	-2.77015	-4.05795	1.96746	0.000194221	0.000106504
5869	-1.50105	-4.47809	2.71877	4.63238e-12	1.94061e-13
5877	-0.166626	-3.88961	3.93534	1.69873e-13	4.99744e-15
5888	-1.8827	-4.49863	2.59823	1.24465e-10	7.52823e-12
5925	-3.19278	-4.986	2.01705	0.00117321	0.000794384
5953	-1.05754	-4.22442	2.6024	8.37398e-08	1.41307e-08
5958	-1.65018	-3.70914	1.40223	0.00173208	0.0012209
5980	-4.62877	-2.99388	-1.45369	0.00335857	0.00253572
6084	-4.96482	-2.86545	-1.65155	0.00142148	0.000986239
6169	1.52339	-2.98704	4.51042	0.000175415	9.36315e-05
6241	0.282452	-2.39879	3.00968	1.50266e-09	1.29436e-10
6250	-0.877098	-4.58488	3.00961	9.76134e-05	4.95534e-05
6352	1.38684	0.0286355	1.54812	0.00642512	0.00513072
6354	3.53463	2.25365	1.54818	0.000668653	0.000419438
6385	3.19735	1.72239	1.42845	1.73082e-05	7.13266e-06
6401	0.477928	-3.31219	3.61344	2.42885e-08	3.55552e-09
6419	-0.951368	-4.36641	2.33933	0.000366687	0.000216525
6503	-0.195951	-2.26627	1.48902	0.00787126	0.00640223
6518	0.854577	-4.42872	3.34608	0.000132718	6.88419e-05
6651	0.488396	-3.74986	3.84982	4.32667e-09	4.62298e-10
6786	-2.9282	-4.6038	2.21483	2.68728e-06	9.03656e-07
6856	1.24007	2.38212	-1.54822	0.00647305	0.00517662
6912	3.1307	1.62754	1.6738	0.00089171	0.000577964
6984	1.82853	-0.686065	2.23403	0.00820379	0.00669008
6991	0.145514	-3.59906	3.06379	4.17267e-06	1.49564e-06
7067	-2.66911	-0.679403	-2.1777	0.000433425	0.000257974
7097	-0.520199	-2.27149	2.11025	0.00529918	0.00416177
7123	-0.78258	-4.63962	3.59327	6.03718e-10	4.72529e-11
7140	-0.495979	-3.56889	2.93381	1.493e-06	4.01625e-07
7153	-2.68992	-4.31376	1.98517	1.1891e-06	3.10079e-07
7166	-3.68992	-1.30133	-2.56602	2.23035e-06	7.39602e-07
7265	-4.62693	-1.24723	-2.80187	5.34314e-05	2.53262e-05
7271	0.569748	-3.31684	3.55805	0.00889698	0.00735169
7287	0.507015	-3.72229	3.32637	2.6064e-05	1.12991e-05
7292	-1.78953	-3.86766	3.49056	2.18588e-09	2.20382e-10
7293	-2.79036	-4.19974	2.86003	0.00329414	0.0024863
7397	-0.59589	-4.33503	2.8993	1.41101e-05	5.68852e-06
7419	-0.95488	-4.56523	3.25479	9.93306e-09	1.14315e-09
7438	-0.315644	-3.33909	2.37703	0.000774659	0.000495534
7714	-0.114857	1.45342	-1.56828	0.00691126	0.00555959
7748	-4.48395	-2.45665	-1.89153	5.71332e-05	2.71346e-05
7775	-3.58977	-1.96515	-1.83604	0.000188446	0.000102805
7791	-0.592762	-4.66729	4.00229	0.000546951	0.000337516
7844	-4.0599	-2.42851	-1.56657	0.00243973	0.00176678
7882	-1.17478	-3.79261	2.65751	1.81049e-06	5.0237e-07
7946	-2.7257	-3.90492	1.48714	0.00871775	0.00719332
8077	-2.76424	-4.39806	1.55308	0.000148643	7.85371e-05
8093	-0.941628	-2.44676	1.94064	7.76423e-06	2.90254e-06
8110	-1.59329	-3.51706	1.42638	1.15612e-05	4.51402e-06
8266	1.0381	2.73588	-1.55825	0.00201126	0.00144279
8271	-2.37131	-3.84284	1.77443	0.000988755	0.000646216
8296	0.640699	-4.08562	4.3221	9.33454e-14	2.35066e-15
8332	-1.43499	-4.01747	2.4804	2.23035e-06	7.39602e-07
8471	-3.21786	-1.46168	-1.72774	0.00581323	0.0046038
8539	0.608518	-4.2619	4.72267	2.23035e-06	7.39602e-07
8587	0.882067	2.4419	-1.86127	0.00380922	0.00291403
8841	-1.29678	-4.43318	3.07336	6.99273e-05	3.40009e-05
8852	0.584223	-3.23179	3.19829	2.42826e-12	9.65816e-14
8910	-0.928375	-3.16292	1.94716	1.14542e-13	2.91141e-15
8936	0.071016	2.0583	-1.51066	2.29121e-05	9.85184e-06
8978	-0.406377	-3.04288	1.63359	0.00784084	0.00636642
9042	-1.15923	-3.33743	2.77694	4.87022e-08	7.81712e-09
9349	-0.820962	-3.31183	2.07982	0.000148179	7.81425e-05
9435	-1.46679	-3.75219	2.05939	0.000124214	6.41681e-05
9470	-4.64089	-2.99508	-1.54236	0.00270523	0.00199788
9515	-0.410913	-4.0689	3.35129	0.000448905	0.000268667
9516	-1.41569	-4.86207	2.79192	2.67012e-08	3.94642e-09
9531	0.835251	-3.9555	3.89455	2.42885e-08	3.55552e-09
9684	0.192753	-4.69021	4.47957	3.75217e-11	2.04872e-12
9712	-0.979267	-3.98122	2.04	6.40763e-05	3.06131e-05
9724	-0.471123	-4.20763	3.53622	7.65944e-15	1.5683e-16
9749	-1.23287	-3.4447	1.51444	0.000412092	0.000244695
9751	0.539752	-2.83412	3.37387	0.00380922	0.00291403
9850	0.0510167	-3.3166	2.79657	2.85422e-05	1.24541e-05
9906	3.75901	1.82975	1.87553	0.000546951	0.000337516
9967	1.27057	2.02458	-1.40659	0.00993729	0.00829316
9971	0.855722	2.58611	-1.78009	0.000668653	0.000421272
10031	-0.974132	-4.22467	3.51183	1.01106e-07	1.75848e-08
10170	0.697499	-1.89983	3.55375	7.9338e-07	1.99419e-07
10205	0.134713	-3.67294	3.9288	0.00993729	0.00829316
10220	-0.339698	-3.47486	2.74667	0.00251473	0.00184418
10246	-0.139064	-1.53591	2.44948	0.000293038	0.000167312
10367	2.01556	-0.515173	2.78089	0.000668653	0.000421272
10383	-1.76814	-4.40521	1.92213	0.00142148	0.000986239
10490	0.761615	-2.6853	3.48926	3.90894e-06	1.36707e-06
10500	0.199118	1.85313	-1.78034	0.000234386	0.000129467
10513	0.325205	1.96411	-1.863	0.000467626	0.000283833
10561	-0.382061	2.85448	-3.22518	3.05646e-05	1.35605e-05
10562	0.973226	-4.16603	5.6896	7.47914e-17	1.09133e-18
10646	0.327969	-4.20256	3.2221	1.24139e-05	4.88786e-06
10661	-2.30187	-4.66558	2.14295	0.000244082	0.000136086
10884	-1.66454	-3.1423	1.46832	0.00399508	0.00308022
10898	2.72746	1.14135	1.79436	0.000386508	0.000228958
11106	-2.32126	-4.41876	2.15044	5.60351e-07	1.3412e-07
11156	-1.78428	-3.88775	1.75453	3.05022e-05	1.33451e-05
11174	0.654746	2.22269	-1.56795	0.000988755	0.000646216
11425	0.478006	-2.2116	1.66579	0.000493003	0.000300745
11466	1.96529	3.10296	-1.75929	0.00826945	0.00681174
11489	0.841009	2.58986	-1.51056	0.00823353	0.00674339
11527	3.31239	-1.17813	2.63722	0.00158868	0.00111458
11587	-0.0825196	-4.41815	3.53402	6.41598e-07	1.56738e-07
11725	0.607542	2.90253	-2.31806	6.77219e-08	1.1125e-08
11740	-4.19355	-1.97985	-1.91048	0.000191986	0.000104962
11805	0.0999925	2.50633	-2.40634	0.00158868	0.00111458
11839	2.67988	0.954135	1.46993	8.56589e-06	3.28403e-06
12027	-2.45964	-4.53961	1.73896	0.00034453	0.000201172
12299	1.1072	-2.70416	3.35919	0.00359641	0.00272969
12355	3.70815	1.89723	1.58225	0.00200096	0.00143261
12502	-0.770341	-3.35788	2.25719	0.00318015	0.00239353
12565	-1.32012	-4.21264	2.59326	2.86271e-08	4.28497e-09
12575	-1.70586	-4.1751	2.28206	0.000308307	0.000176538
12618	2.95241	2.00866	1.83994	0.00465562	0.00363662
12619	1.4224	2.51751	-1.5632	0.00442535	0.00342551
12673	-1.68018	-4.06581	2.0843	0.000293038	0.000167312
12683	-0.168747	-2.35756	2.45981	0.000448905	0.000268667
12725	-1.26498	-4.75486	2.56044	0.000784829	0.000503332
12851	1.02233	-2.63279	2.91016	0.000988812	0.00065348
12887	-3.83373	-2.83196	-1.96256	0.00954424	0.00792246
12932	2.22862	-0.114492	2.45939	0.00826945	0.00681174
12939	-0.85314	-4.25823	2.47297	0.000129978	6.72373e-05
13004	3.76844	1.31407	1.64997	0.00569094	0.00448418
13029	0.466523	-4.70009	3.76015	0.00125099	0.000857939
13037	-1.47754	1.32898	-2.71344	0.000276573	0.00015713
13055	-2.01207	-4.22278	1.87778	8.13181e-11	4.72713e-12
13096	2.90003	-1.17235	3.43074	1.19843e-07	2.10691e-08
13203	-1.02475	-2.69581	1.64323	0.000931092	0.000605023
13260	0.143701	-2.56501	3.06014	2.10954e-06	5.98256e-07
13311	-2.72858	-4.29963	1.4592	1.7387e-10	1.06393e-11
13399	1.58349	3.01375	-1.43026	0.000988755	0.000646216
13418	0.469533	2.48988	-1.91309	0.000188446	0.000101454
13500	0.314445	-2.01117	1.44087	0.00251508	0.00184518
13511	1.13808	-0.196504	1.58666	0.00158868	0.00111458
13630	-0.90656	-4.36964	3.12936	5.92772e-09	6.529e-10
13640	-0.571381	-3.47151	1.51538	0.0015248	0.00106044
13863	-1.85751	-3.8436	1.57025	0.000805761	0.000517325
14005	0.729571	2.40736	-1.65043	0.000988812	0.000656027
14041	1.12592	-4.78177	6.35005	2.23035e-06	7.39602e-07
14045	-0.809235	1.85112	-1.97232	0.00993729	0.00829316
14121	2.53809	3.95654	-1.45889	0.00380922	0.00291403
14151	-0.83275	-3.17491	2.72021	0.0012591	0.000865277
14214	0.626867	-3.86077	4.64937	2.23035e-06	7.39602e-07
14218	0.50766	-1.23266	1.87024	0.00787126	0.00640223
14224	-4.25801	-2.18676	-1.87116	0.000260034	0.000146204
14263	0.409312	-4.7225	5.20102	7.47914e-17	1.09133e-18
14420	-2.00556	-3.90988	2.12052	0.000407989	0.00024197
14550	-0.164201	-4.37778	3.47735	1.82714e-08	2.22749e-09
14561	-3.43349	-4.99029	1.53729	0.000480184	0.000291908
14567	1.63809	3.3346	-1.6841	0.00640714	0.00511335
14595	-0.675622	-3.23272	1.90553	0.000412092	0.000244695
14618	-2.61681	-4.41019	1.49976	0.00409321	0.00315781
14748	-2.66357	0.467031	-1.96197	0.00949101	0.0078738
14853	1.36248	2.64047	-1.47549	0.00569094	0.00448418
15107	0.442181	-1.3585	1.56469	3.23138e-05	1.44952e-05
15268	1.06705	-2.24657	3.52305	1.30451e-09	1.11446e-10
15388	-0.463848	-2.78214	2.0395	0.000193821	0.000106192
15402	0.826934	2.20069	-1.41812	0.00465562	0.00363662
15438	-0.0326255	-3.8635	3.40257	0.000204987	0.000112745
15443	0.0394731	-4.86273	2.72626	0.00159784	0.00112214
15567	1.53715	-3.71606	3.02757	0.000237495	0.000132246
15578	-2.96308	-4.31139	1.74464	0.000386508	0.000228958
15587	0.647314	-2.74792	3.12913	1.67716e-11	7.61806e-13
15680	0.953402	-3.69298	3.55762	6.41598e-07	1.56738e-07
15698	-2.25243	-0.58114	-1.51542	0.000454002	0.000274392
15810	-4.44899	-2.72637	-1.50423	0.0028061	0.00208559
15960	2.32805	-0.367623	1.48553	0.00713042	0.005761
15966	-4.68902	-1.25796	-3.13481	0.000595534	0.00037128
16036	-2.27012	-4.77324	1.89737	0.007795	0.00632736
16050	-0.660095	-3.73382	2.69608	1.67676e-06	4.60654e-07
16099	-1.06383	-3.42363	2.07129	6.78642e-06	2.51837e-06
16187	0.390996	-1.02935	1.65593	0.00317983	0.00239179
16197	-2.08977	-4.74288	2.16629	6.03718e-10	4.72983e-11
16198	2.04712	3.32085	-1.59842	0.00238954	0.00172931
16252	-1.59398	-4.19123	1.44426	0.00232601	0.00167676
16253	2.04419	-2.55124	3.25053	0.00123006	0.000835766
16333	0.0119805	1.68629	-1.59223	5.22563e-05	2.45847e-05
16340	1.44441	3.04622	-1.6454	7.5825e-06	2.82492e-06
16348	1.13315	2.7118	-1.67954	0.00465562	0.00363662
16742	-2.75891	-4.18522	1.59184	3.93166e-06	1.37594e-06
16771	-3.37341	-4.6734	1.5204	7.9646e-05	3.89889e-05
16907	2.43032	-0.740456	2.12772	0.00117321	0.000794384
16987	3.21897	2.19083	1.53413	0.00455276	0.00353377
17043	1.07173	2.37812	-1.49556	0.0024983	0.00182978
17300	-0.558139	-2.49902	1.46314	0.00380922	0.00291403
17355	3.2589	0.847749	2.46374	2.09505e-05	8.87523e-06
17408	-2.03111	-4.30419	1.89004	3.05646e-05	1.35233e-05
17480	3.60623	1.62742	1.97783	1.96946e-05	8.17635e-06
17560	-0.649865	-4.138	3.01098	0.0024983	0.00182978
17625	2.35144	0.767975	1.89233	0.000774659	0.000495534
17798	-5.50747	-3.59297	-1.87073	0.000448905	0.000268667
18012	0.117114	-1.11642	1.91976	0.00131087	0.000904561
18169	-1.42438	-3.50989	2.08551	0.000102604	5.21595e-05
18407	2.96785	-0.0406008	2.89816	3.13597e-05	1.40524e-05
18413	3.9516	2.86561	1.45069	9.08709e-08	1.55265e-08
18489	-3.91389	-1.98385	-2.14089	0.00529918	0.00416177
18742	-0.536408	1.37976	-1.50674	0.00569094	0.00448418
18787	-0.901455	-2.77254	1.58645	0.00691126	0.00555959
18976	0.911289	2.8496	-1.58317	2.09505e-05	8.87523e-06
19010	-0.459384	-2.96216	2.50278	0.00309028	0.00231643
19102	0.333773	-3.12057	1.83387	0.00430721	0.00332595
19137	-3.98949	-2.49738	-1.49211	0.00583783	0.00462465
19367	-3.25283	-1.42933	-1.65137	0.00826945	0.00681174
19408	-4.30879	-2.5119	-2.14282	0.0090405	0.00748517
19722	-2.67114	-4.06914	1.66937	0.00823353	0.00674339
19792	-1.79681	-4.44306	2.15037	0.0003358	0.000193703
20043	1.75709	-0.65761	2.81175	0.00827142	0.00681726
20104	-0.613485	-3.89543	3.47552	4.17267e-06	1.4792e-06
20118	0.776389	-4.16047	2.34677	0.00109105	0.000730021
20164	-2.87633	-4.4831	1.60429	0.00499156	0.00390608
20182	-1.72704	-4.06132	2.25118	0.00719775	0.0058324
20190	-5.00263	-2.63706	-2.57814	0.00073751	0.000466563
20232	-1.20832	-3.60832	2.51627	0.00093303	0.000606942
20240	1.66318	2.86549	-1.56414	0.00158868	0.00111458
20265	0.387019	-2.97175	3.20714	3.13597e-05	1.40524e-05
20289	1.7864	-2.06323	3.31248	0.000188446	0.000102805
20330	0.612892	-3.44801	2.84424	3.55407e-08	5.41182e-09

## Sheet: 019
dmr_id	median1	median2	median_change	padj	pval
39	-0.790997	1.2327	-2.11174	0.00759089	0.0058183
78	0.720416	2.30798	-1.64484	1.61108e-05	5.2938e-06
119	1.22427	2.61533	-1.47702	0.000873739	0.000495534
139	0.671126	2.68714	-1.99674	0.00477917	0.00342551
216	-2.78831	2.40895	-4.52797	0.00732665	0.00555959
242	0.539473	-3.38881	4.01766	0.00100243	0.000577964
322	-2.10812	2.10737	-3.28273	0.00200974	0.00127452
334	-2.83075	0.966692	-3.19684	5.89921e-06	1.69029e-06
446	-3.74003	-1.57575	-1.70872	0.00221606	0.00141168
499	-1.09004	2.14573	-3.20121	0.00337305	0.00231643
606	0.720472	1.9646	-2.06104	0.000216927	0.000101454
627	-0.11755	2.04691	-2.02777	0.00268041	0.00176678
656	-0.821807	0.831832	-1.57445	0.00160163	0.000986239
658	0.481206	2.54983	-2.26498	5.67761e-05	2.21881e-05
661	0.355376	2.38713	-2.3135	6.31244e-07	1.0606e-07
702	-0.219872	1.89803	-2.14038	0.00732665	0.00555959
795	-1.66033	1.68132	-3.32757	0.000516724	0.000274392
804	-3.35652	1.2798	-3.89449	0.00501092	0.00363662
835	0.645299	2.62312	-1.83371	0.00753991	0.00576106
946	-0.626229	0.425135	-1.58576	0.00031484	0.000154765
960	-1.74371	-3.95275	2.03122	1.11153e-06	1.96306e-07
962	-3.88401	-1.94318	-2.69139	0.00373027	0.0025928
1077	-0.272252	1.92302	-2.1665	2.84748e-09	1.42842e-10
1152	-4.16812	-1.10113	-1.41621	0.00997436	0.00786587
1160	-0.432148	1.30933	-2.45765	0.000216927	0.000101454
1189	0.237893	1.61055	-1.48319	8.97689e-05	3.71464e-05
1207	-0.0607551	1.51278	-1.45809	0.000173462	7.93783e-05
1216	0.650119	3.10536	-2.51207	0.000217069	0.000102805
1243	1.19957	2.6417	-1.40513	0.00111164	0.000656027
1251	0.470508	2.20147	-1.93343	0.00417721	0.0029666
1276	0.0917813	2.39986	-2.22488	0.0041255	0.00291403
1323	0.189997	2.3406	-1.76603	0.000135377	5.97259e-05
1329	0.920093	2.96057	-1.9831	0.00187271	0.0011827
1352	0.124439	1.65482	-1.46994	0.00221829	0.00143261
1383	-3.76472	-1.75208	-2.01264	0.00732665	0.00555959
1445	-3.32796	-0.754217	-2.76241	0.00419346	0.00298365
1484	-0.490872	2.58	-2.90407	5.67761e-05	2.21881e-05
1525	-0.405874	1.27662	-2.22176	0.00359176	0.0024863
1571	-0.311108	2.58184	-2.49823	0.00871757	0.00681174
1583	1.46824	2.7607	-1.60038	0.00832418	0.00640223
1645	-0.475768	1.90454	-2.82753	0.000293435	0.000142315
1670	3.23316	1.97672	1.61096	0.00501092	0.00363662
1692	-0.687849	1.47626	-2.37333	0.00567119	0.00416177
2000	-1.62425	1.14184	-1.97508	0.00341536	0.00234923
2034	-4.216	-1.99266	-2.01636	0.00177904	0.00111458
2098	-0.729002	0.552077	-2.20385	1.79597e-07	2.11268e-08
2159	-3.86944	-2.78923	-1.42755	0.000377341	0.000190034
2280	-3.23719	0.162103	-2.36001	0.000873739	0.000495534
2361	-0.106032	2.22371	-2.01175	0.00580211	0.00426675
2378	-3.18269	0.274283	-3.05725	0.00732665	0.00555959
2434	-1.83277	2.5947	-3.58751	0.00488508	0.00351854
2554	-0.209811	1.68411	-2.27712	2.03831e-05	6.9298e-06
2623	-1.34164	2.94271	-3.34013	6.07285e-05	2.38923e-05
2722	-4.08401	-2.40178	-1.62772	0.00276499	0.00184858
2816	-1.20132	2.66219	-3.40468	0.000516724	0.000274392
2844	-3.13541	0.0874102	-2.5996	0.00391241	0.00272969
2887	-2.03446	2.08413	-3.05247	0.00100243	0.000577964
2960	-3.88857	-1.49452	-1.82615	0.00826074	0.0063444
2962	-0.354372	-3.42987	3.0755	4.70094e-05	1.77284e-05
2971	-2.95694	-1.76935	-2.04316	0.00871348	0.00671501
2988	1.34246	3.36112	-1.64565	0.00732665	0.00555959
3003	-3.68859	-2.09212	-1.57211	0.00383203	0.00267193
3093	0.157204	2.00776	-1.45261	0.0041255	0.00291403
3101	1.42218	2.37507	-1.68246	0.00997611	0.0078738
3105	0.675897	2.44892	-1.80606	0.00502068	0.0036448
3226	0.0224613	2.06756	-2.20592	0.00759089	0.0058183
3301	0.357222	2.39907	-2.25717	2.53697e-05	8.87523e-06
3302	1.33128	3.0653	-1.70822	0.00417617	0.00296311
3361	0.137502	2.71674	-2.33505	0.00337305	0.00231643
3588	0.270879	2.44419	-2.17331	0.00274316	0.00182978
3617	-3.35406	-1.09471	-1.52096	0.00359176	0.0024863
3626	-0.704563	2.76941	-2.32164	0.00753991	0.005761
3709	-1.65993	-4.61522	3.12341	8.17722e-05	3.32821e-05
3711	-1.12348	2.94046	-3.38799	1.81546e-05	6.03693e-06
3712	-2.89516	2.1011	-3.67991	5.29682e-06	1.49564e-06
3714	0.52258	2.87475	-1.76226	0.00187271	0.0011827
3721	-3.86678	-1.51767	-1.48966	0.00906483	0.00710492
3823	1.05663	3.31309	-2.38188	3.39436e-10	1.12577e-11
3901	0.557862	2.29149	-1.79633	0.00732665	0.00555959
3976	-0.217348	2.7711	-2.81845	0.000689655	0.000379499
4166	0.727476	2.41225	-1.67035	0.00477917	0.00342551
4197	1.0764	2.59455	-1.51815	0.00871563	0.00674339
4234	0.678241	2.72707	-1.7967	0.00580211	0.00426675
4272	-1.27431	0.590563	-2.34411	0.000836214	0.000468756
4312	0.934654	3.60266	-2.24195	0.00262793	0.00172931
4333	0.385074	2.2954	-1.91033	0.000516724	0.000274392
4335	0.196325	3.19534	-2.30359	5.89921e-06	1.69029e-06
4338	-1.56366	1.48659	-2.37774	0.00567119	0.00416177
4343	1.27627	3.14304	-1.81884	0.00131916	0.000794384
4408	-0.33029	1.686	-2.1258	0.005382	0.00392361
4577	1.58816	3.34623	-1.516	0.00337305	0.00231643
4591	-0.0368675	2.35858	-2.26955	0.000216927	0.00010136
4820	-3.97814	-1.34806	-1.86839	0.00557664	0.0040704
4843	0.111485	2.33509	-2.08196	2.90059e-06	6.17847e-07
4882	1.37889	2.563	-1.4013	0.00732665	0.00555959
4888	-0.331194	1.39443	-1.74778	0.0017886	0.00112214
4913	0.151997	1.91068	-1.75868	0.00195848	0.00123816
4936	0.359567	2.86223	-2.87629	0.000977939	0.000562341
5025	-0.348018	2.64006	-2.38495	0.00128847	0.000769977
5065	0.274491	2.66251	-1.78944	1.06598e-06	1.85876e-07
5103	-4.6588	-3.08749	-1.42727	0.00221829	0.00143261
5122	-1.08113	-3.84089	3.0144	8.17722e-05	3.32821e-05
5153	-3.27631	-0.90365	-1.96347	0.00688556	0.00517662
5324	1.11252	-4.28812	5.52097	3.22361e-07	4.611e-08
5337	0.593037	2.06618	-1.50472	0.0041255	0.00291403
5472	-3.57469	-0.800345	-1.74264	0.00347424	0.00239353
5579	1.76458	2.75686	-1.70601	5.67761e-05	2.21881e-05
5623	-2.85218	2.06068	-5.28466	2.53697e-05	8.87523e-06
5625	0.387302	2.99584	-2.43042	0.00997436	0.00786587
5632	-0.628652	2.23861	-2.36482	0.000114421	4.95534e-05
5710	0.416906	3.08487	-1.89856	0.00307622	0.00207754
5713	2.05936	3.42435	-1.51743	0.00871348	0.00671501
5715	1.27615	3.11453	-1.70466	0.00607731	0.00451305
5782	-0.489964	3.0727	-3.49102	2.90059e-06	7.39602e-07
5794	0.75082	3.17581	-1.77782	0.00111164	0.000646216
5841	-1.54329	-4.25531	3.05909	1.78304e-08	1.30457e-09
5959	-4.07787	-2.2447	-1.87725	0.00183955	0.00115531
6015	-0.470346	2.385	-2.85227	2.90059e-06	7.39602e-07
6125	-1.42278	-4.07196	2.49951	9.57427e-06	2.86704e-06
6148	0.317741	1.97299	-2.29782	0.00501092	0.00363662
6310	-0.881252	1.70496	-1.73617	0.00655174	0.00490555
6404	-0.0213066	2.07424	-2.12197	0.00490324	0.00353377
6409	0.358775	3.0383	-2.82644	2.90059e-06	7.39602e-07
6450	-0.740522	1.50516	-1.8815	0.00871563	0.00674339
6522	-3.49255	-1.34013	-1.67532	0.00764302	0.00585993
6539	2.03825	3.3585	-1.75454	0.00177904	0.00111458
6551	0.928444	2.41517	-1.84293	0.00221829	0.00143302
6567	-0.0774295	2.65727	-2.20772	0.00366084	0.00253572
6613	0.0330512	1.65375	-2.05813	0.000377341	0.000190034
6617	-0.499279	2.17733	-2.86009	2.90059e-06	7.39602e-07
6622	-3.73531	-1.39023	-2.16264	5.67761e-05	2.21881e-05
6663	-0.99252	-4.27091	2.83833	0.000294443	0.000144222
6722	2.77557	-0.0645625	2.20047	5.04802e-05	1.92742e-05
6770	0.799768	2.86114	-2.10714	0.000126868	5.5166e-05
6771	-0.350233	1.44278	-2.64251	0.00501092	0.00363662
6829	0.954427	3.26318	-1.55759	0.00177904	0.00111458
6851	-0.36478	1.96676	-2.05474	0.00488508	0.00351854
6986	-2.08343	2.49805	-2.81333	0.00567119	0.00416163
7093	0.909807	-0.949862	2.9654	6.36992e-05	2.53262e-05
7103	-1.57084	1.95249	-3.20404	0.00177904	0.00111458
7176	-0.102325	3.41767	-3.55188	7.71879e-06	2.2759e-06
7296	-0.564575	2.44316	-2.77344	0.00607731	0.00451305
7373	0.345254	-4.31717	4.30397	2.90059e-06	7.39602e-07
7406	0.809138	2.76767	-1.90383	0.000335286	0.000167312
7484	1.54643	2.31337	-1.89	0.000611015	0.000328532
7490	0.65662	2.59493	-2.14469	6.94962e-06	2.01562e-06
7505	-0.624045	1.85802	-1.86214	0.00732665	0.00555959
7551	-0.7329	1.74772	-2.67999	2.27287e-05	7.76212e-06
7563	-2.73083	0.12011	-2.25274	0.00688166	0.00516614
7569	-4.11119	-1.87902	-2.61173	0.00307622	0.00207754
7571	0.275679	2.24328	-2.09984	0.00177904	0.00111458
7589	0.288101	2.37997	-1.97464	1.61108e-05	5.2938e-06
7620	0.236203	2.31794	-1.82326	0.00997611	0.0078738
7646	1.72983	3.3047	-1.57487	0.00871757	0.00681174
7659	0.790966	3.11187	-2.01292	0.00289701	0.00194382
7685	1.86651	3.68548	-1.78153	0.000710338	0.000392437
7738	-3.64376	-1.43714	-1.57328	0.000171757	7.8222e-05
7942	-0.800419	1.85266	-1.97336	0.00158085	0.000971368
7957	0.291543	3.06273	-2.85518	1.43886e-08	1.03369e-09
7958	0.37017	2.94956	-2.90684	2.90059e-06	7.39602e-07
7959	0.471961	-2.1569	2.14092	2.90059e-06	7.39602e-07
7962	0.179602	2.98831	-3.14478	0.000294443	0.000144222
7963	0.578405	-5.1371	5.57427	2.90059e-06	5.98256e-07
8185	0.507528	1.90656	-1.85252	0.00111164	0.000656027
8203	-1.10731	1.65925	-2.44172	0.000677416	0.00037128
8214	1.41814	3.00508	-1.58177	1.80683e-06	3.41972e-07
8230	0.547672	1.46123	-1.41311	0.00906483	0.00710492
8284	1.75458	3.0432	-1.62018	0.000784403	0.000437478
8336	0.163878	2.07542	-1.89684	1.11153e-06	1.99419e-07
8353	0.803842	2.4728	-1.93404	0.000177432	8.13506e-05
8394	0.595915	2.41774	-1.61117	0.000269256	0.000129467
8444	-0.00825149	2.35675	-2.48541	0.00501092	0.00363662
8454	-2.74081	1.50933	-4.07409	5.29682e-06	1.49564e-06
8482	0.57152	2.38549	-1.83184	0.000516724	0.000274945
8483	0.992906	2.53568	-1.88019	2.17553e-05	7.4249e-06
8517	0.0290211	1.88631	-2.19499	0.00177904	0.00111458
8590	0.689537	1.6583	-1.75706	0.0037912	0.00264198
8593	0.679086	2.83046	-1.7956	0.00221829	0.00143261
8607	0.720059	3.00643	-2.30888	0.000173462	7.93783e-05
8611	-0.426551	1.7454	-1.80954	0.00607731	0.00451305
8645	0.701985	3.00692	-1.89034	0.00111164	0.000646216
8735	-0.156307	2.37745	-2.48155	0.000157953	7.06894e-05
8755	-0.757325	3.20216	-3.76554	3.22361e-07	4.98547e-08
8848	-1.97836	0.824313	-2.87417	0.000114421	4.95534e-05
8964	0.788937	2.72434	-2.18767	5.04802e-05	1.92742e-05
8989	0.790506	2.85817	-2.25307	1.4345e-06	2.66669e-07
8995	-0.390426	1.34995	-1.87403	0.00186826	0.00117457
9053	-2.92236	-1.01934	-1.5103	0.00337305	0.002292
9080	1.08779	2.93515	-1.62973	0.00111164	0.000656027
9085	0.770672	2.51284	-2.0471	0.000963221	0.000553034
9088	-0.0480282	1.99659	-1.89812	0.000303284	0.000148619
9089	2.14988	2.83342	-1.53302	2.00188e-06	3.86782e-07
9118	1.06602	3.03194	-2.25476	0.000873739	0.000495534
9126	1.02256	2.93735	-2.05658	0.00262793	0.00172931
9127	0.105569	1.89955	-1.4079	0.000113644	4.82209e-05
9141	0.422138	1.86646	-1.66928	0.00221829	0.00143261
9157	1.3443	2.66607	-1.83491	0.00655174	0.00490555
9224	1.1074	2.14458	-1.81165	0.00276499	0.00184858
9226	-0.258605	1.60792	-1.75553	0.000377341	0.000190034
9252	-1.37439	2.44523	-2.2728	1.19813e-15	7.87382e-18
9268	1.09718	2.81589	-1.55268	0.00176995	0.00109725
9332	-0.00945153	2.90756	-2.87486	0.000516724	0.000274392
9352	0.440921	1.57671	-1.52863	0.00952335	0.00748517
9358	0.658436	2.43621	-1.60293	0.00624007	0.00464486
9385	-1.31795	1.02019	-2.00972	0.00177904	0.00111458
9442	1.30173	2.79206	-1.62501	0.0041255	0.00291403
9570	-0.387824	3.47168	-2.94528	0.000377341	0.000190034
9789	-0.12064	1.95497	-2.3062	0.00039448	0.000201172
9818	-3.03888	1.90967	-4.28141	0.00607731	0.00451305
9825	-0.0186126	1.92823	-1.97103	9.16447e-05	3.79427e-05
9851	0.777215	2.8458	-1.92151	0.00373027	0.0025928
9877	1.00443	3.05965	-2.05522	0.00655174	0.00490555
9925	0.699092	3.3464	-2.65713	0.005382	0.00392361
9947	1.29583	3.26293	-2.26149	0.000216927	0.000101454
9950	0.847158	2.3887	-2.05753	0.00111164	0.000656027
9955	-1.38948	2.32725	-3.48704	0.00607731	0.00451305
9959	1.18363	3.15413	-1.95322	0.00501092	0.00363662
9973	2.40512	3.34959	-1.40386	0.00607731	0.00448418
9981	1.69841	3.09213	-1.44874	0.0041255	0.00291403
9989	0.73208	3.01413	-1.62534	0.00567119	0.00416177
10083	-3.6022	1.82847	-5.03647	0.00753991	0.00576106
10089	-3.35235	1.25831	-3.57859	0.000915931	0.000523275
10212	-3.04226	2.24884	-4.80787	0.00732665	0.00555959
10375	-2.92657	-0.299706	-2.71322	0.00337305	0.00231643
10401	-0.934147	-3.2033	1.42301	0.0062852	0.0046812
10495	-2.46989	-4.86301	2.79114	1.18014e-05	3.70198e-06
10497	0.656199	2.35745	-1.6615	0.00449905	0.00321093
10509	-0.974075	1.94489	-1.66125	0.00138435	0.000835766
10526	1.75398	3.37149	-1.78647	0.00607731	0.00451305
10553	-0.637099	2.31278	-2.64713	0.00732665	0.00555959
10556	0.579513	1.83867	-1.73516	0.00490324	0.00353377
10587	-1.99755	-4.9807	2.37913	1.4345e-06	2.64352e-07
10616	-2.01662	0.297076	-2.10382	0.00307622	0.00207754
10624	-0.167819	2.73084	-3.14155	1.05202e-12	1.61317e-14
10630	-3.20322	-1.11743	-1.50239	0.00891384	0.006969
10771	-2.70971	-1.0517	-1.49656	0.00567119	0.00416163
10774	0.109371	2.97166	-2.67299	0.00732665	0.00555959
10781	-0.900487	2.35997	-3.04526	5.67761e-05	2.21881e-05
10788	-3.50178	-1.85391	-1.65736	0.00337305	0.00231643
11040	-0.357376	2.83206	-3.41145	1.82069e-06	3.48983e-07
11044	-0.0699612	2.78643	-3.02293	8.2825e-05	3.40009e-05
11163	1.63579	2.86957	-1.78209	2.90059e-06	6.48832e-07
11165	0.0877206	2.07424	-1.88876	0.000157953	7.06894e-05
11167	0.615995	2.81217	-1.4739	0.00788998	0.006051
11181	-0.160441	2.24986	-2.97232	0.000873739	0.000495534
11188	-4.42877	-0.659339	-3.64954	0.000135377	5.97259e-05
11201	-4.76151	-0.788603	-2.65469	0.00732665	0.00555959
11213	-0.222803	2.7762	-2.51642	6.31244e-07	1.0606e-07
11265	-0.151832	2.07613	-1.84148	0.00274316	0.00182978
11362	0.236662	2.79263	-2.03967	7.38056e-05	2.97324e-05
11375	-1.20137	1.18187	-2.96682	0.000317109	0.00015713
11439	0.12556	2.00591	-1.66022	6.91417e-05	2.7581e-05
11549	-4.08302	-2.74142	-1.78121	0.00216329	0.00137664
11604	-2.31885	-4.82765	3.12754	1.11072e-09	4.93922e-11
11754	0.284106	2.33492	-2.1336	0.000556714	0.000297687
11927	-1.1074	2.11137	-3.3197	0.000217069	0.000102805
11938	-0.455592	1.71294	-2.0115	0.00732665	0.00555959
11947	1.72427	2.88913	-1.4195	0.00488508	0.00351854
12033	0.0420202	2.62438	-2.19838	0.00111164	0.000646216
12073	0.381375	2.52844	-2.14556	0.0041255	0.00291403
12092	0.451932	2.21832	-1.70586	0.000873739	0.000495534
12128	1.66688	3.08816	-1.43513	0.000135377	5.97259e-05
12144	0.0631691	3.05334	-3.33203	0.00417617	0.00296311
12169	1.44916	3.15598	-1.70682	0.00262793	0.00172931
12185	0.386268	2.047	-1.61912	0.00256258	0.00167676
12216	-3.77539	-1.70804	-1.81588	0.00419346	0.00298365
12233	-3.25421	1.4872	-2.05718	0.000621024	0.000337516
12251	2.20287	4.27719	-1.74485	0.00337305	0.00231643
12256	-0.492956	1.94582	-2.24886	0.00331095	0.00224768
12313	-3.07969	-4.49077	1.45976	0.00136216	0.000821173
12344	-1.97643	1.84097	-1.77477	0.00148004	0.000904561
12457	-0.0440416	1.4833	-1.72681	0.00871757	0.00681174
12498	-0.996689	1.44818	-2.68585	0.000294443	0.000144222
12570	0.254797	2.02823	-1.42157	0.0085771	0.00660615
12610	-1.00336	2.63993	-3.255	0.00141186	0.000857939
12611	1.57245	2.47607	-1.4593	0.005382	0.00392361
12662	-0.437071	2.13217	-2.16369	2.53697e-05	8.87523e-06
13103	-3.46754	-0.253616	-3.01918	0.00341536	0.00234923
13151	-0.4216	0.944843	-2.14554	0.000516724	0.000274392
13162	-3.5541	-1.84345	-1.66493	0.00607731	0.00451305
13230	-0.0612961	2.24791	-2.02434	0.00688556	0.00517662
13296	-1.18693	2.71685	-2.45018	0.00200974	0.00127452
13343	-1.11034	1.5729	-2.69495	0.000915931	0.000523275
13371	-0.569081	1.34583	-2.21396	2.89408e-05	1.03464e-05
13381	-0.169122	2.37097	-3.08	2.53697e-05	8.87523e-06
13411	1.50687	3.12528	-1.8717	0.0041255	0.00291451
13463	0.708071	2.88257	-1.44928	0.00997436	0.00786587
13470	0.464612	2.31025	-2.53253	0.000443066	0.000228958
13474	-2.10958	0.876974	-2.98655	0.00131916	0.000794384
13588	1.60094	-2.95014	3.798	0.00871757	0.00681174
13615	-1.58539	2.36701	-4.32032	1.58405e-05	5.17722e-06
13717	-2.87348	-1.19233	-2.44511	0.00753991	0.005761
13824	-4.27023	1.70679	-4.63143	0.00222813	0.00144279
13833	-4.10597	-1.17006	-2.46905	0.00247224	0.00160953
13842	0.328548	2.36806	-2.03951	1.52204e-05	4.88786e-06
13868	-0.0450822	2.82414	-2.46468	0.00607731	0.00451305
13880	0.132048	2.88678	-2.68824	0.000414041	0.00021278
13895	1.28306	2.7822	-1.96207	0.00274316	0.00182978
13896	0.979524	2.91388	-1.83737	0.000710338	0.000392437
13912	0.779684	3.23444	-1.84943	0.00417617	0.00296311
13928	-0.227163	1.85058	-2.07774	0.00871563	0.00674339
13944	1.48926	3.28369	-1.79443	0.00158085	0.000971368
13947	-0.400453	1.89305	-2.19994	3.4983e-06	9.05037e-07
13976	-1.2191	1.97783	-3.55554	5.67761e-05	2.21881e-05
13977	-1.03103	1.39117	-2.16936	0.00131916	0.000794384
14039	-4.04642	-2.3989	-2.05858	0.000516724	0.000274392
14040	-0.0830046	-2.14772	2.81468	0.00276499	0.00184858
14055	-0.118068	1.21774	-1.6611	0.000414041	0.00021278
14094	-0.585181	1.89593	-2.23008	0.0037912	0.00264263
14100	-0.774467	2.63986	-3.06185	3.22361e-07	4.98547e-08
14131	0.0910093	2.39686	-2.90416	0.000621024	0.000337516
14159	1.27147	3.05407	-1.74469	8.34483e-05	3.43847e-05
14166	-0.219966	2.02392	-1.60164	0.000114421	4.95534e-05
14244	0.938977	2.52252	-1.75719	0.00501092	0.00363662
14323	0.345679	2.39902	-2.2157	0.00624007	0.00464486
14695	-1.10714	2.59023	-3.00856	2.90059e-06	7.39602e-07
14765	-3.2611	-1.0957	-2.27664	0.00268041	0.00176678
14875	1.52793	3.06579	-1.61768	0.00274316	0.00182978
14894	0.640667	2.23284	-1.85482	1.52204e-05	4.88786e-06
14918	-0.230531	2.05711	-2.24388	0.00354659	0.00244493
15030	0.697773	2.29566	-1.74207	0.000154581	6.88419e-05
15103	1.46462	3.22146	-1.77935	0.00655174	0.00490555
15126	1.31271	2.72556	-1.5147	0.00128847	0.000769977
15129	-0.00363481	2.1406	-1.60481	0.000915931	0.000523275
15134	-2.7684	-0.848741	-1.98409	0.00262793	0.00172931
15142	-4.70142	-2.89706	-1.68668	0.0037912	0.00264198
15218	1.14398	2.75996	-1.5381	0.00655174	0.00490555
15307	-0.354221	1.81832	-2.06456	0.000677416	0.00037128
15336	-1.44606	2.23133	-3.66155	3.22361e-07	4.98547e-08
15486	-2.49165	-0.456022	-3.18999	0.000677416	0.00037128
15612	1.29487	2.72709	-1.54208	0.00871563	0.00674339
15676	-3.31819	-1.22488	-1.71616	4.42567e-05	1.66072e-05
15684	-0.142976	2.13786	-2.58537	0.00222948	0.00144513
15728	-1.17484	1.51892	-3.18932	9.63277e-06	2.95841e-06
15820	0.066	1.81869	-1.81987	0.00222948	0.00144513
15827	0.0270779	2.14413	-1.69319	0.00487043	0.00349305
15869	-4.23365	-1.73086	-2.1121	0.00607731	0.00448418
15883	0.757881	2.29456	-1.80953	0.00221829	0.00143261
16010	-0.156208	1.63612	-2.71294	0.00359176	0.0024863
16106	-0.283027	2.37772	-1.57924	0.000915931	0.000523275
16231	-1.99474	2.5168	-2.61404	0.00871757	0.00681174
16251	-3.85365	-0.977493	-2.32102	3.57586e-05	1.2964e-05
16260	0.483573	2.37639	-1.84341	0.00449905	0.00321093
16289	-0.276023	1.33375	-1.88781	0.00373027	0.0025928
16328	-0.489766	2.50854	-2.60746	0.00222813	0.00144279
16343	0.441034	1.95259	-1.80269	0.000710338	0.000392437
16372	-1.56437	1.95841	-3.42229	2.90059e-06	7.39602e-07
16385	1.0641	2.19803	-1.84081	0.00359176	0.0024863
16388	-1.5217	1.11938	-1.96502	0.0041255	0.00291403
16480	0.710694	2.22961	-1.54508	0.00216329	0.00137664
16496	0.888274	2.87696	-1.8378	0.00655174	0.00490555
16506	-0.0335211	2.34997	-2.40283	2.03831e-05	6.89758e-06
16535	-0.178977	2.08615	-1.88969	2.3407e-06	4.59497e-07
16570	1.56668	3.18354	-1.4377	0.00141186	0.000857939
16590	-0.921272	1.0628	-2.91401	8.19686e-06	2.42584e-06
16754	-0.506437	2.79162	-3.05532	0.00331095	0.00224768
16834	-0.900464	3.05989	-2.91761	8.2825e-05	3.40009e-05
16851	-0.00152199	2.55513	-2.66416	0.000516724	0.000274392
16900	-4.51482	-3.55332	-1.64923	0.00184649	0.00116007
16960	-1.58972	1.16091	-2.63022	0.00997436	0.00786587
16991	-3.31401	0.945649	-3.25114	0.00186826	0.00117457
17047	0.444254	2.206	-1.76455	0.00871757	0.00681174
17326	0.556698	2.38981	-1.97602	2.90059e-06	7.39602e-07
17336	-2.73924	2.07653	-3.90318	1.99981e-05	6.67188e-06
17470	0.313686	2.26182	-1.86774	0.00501092	0.00363662
17493	0.249542	2.45035	-2.41136	6.94962e-06	2.01562e-06
17494	1.12943	2.83312	-1.62809	0.00111164	0.000656027
17508	1.66415	3.25715	-1.72449	0.00268041	0.00176678
17610	0.138093	2.77611	-2.56576	0.000270833	0.000130819
17644	1.05851	2.59378	-1.59388	0.0098072	0.00771256
17648	0.640355	2.03952	-1.57488	0.00683846	0.00513072
17686	-0.148724	2.87505	-2.98032	0.00567119	0.00416177
17755	1.15033	3.40392	-2.69775	0.00177904	0.00111458
17771	0.754172	3.14832	-2.82269	9.60989e-06	2.88402e-06
17838	0.0999071	2.81466	-1.68887	0.00871757	0.00681174
17841	-0.313001	2.67168	-2.61699	0.00221829	0.00143261
17859	1.10455	3.02598	-2.46579	0.00274316	0.00182978
17874	-0.12166	1.87718	-1.52499	0.00488508	0.00351854
17950	0.413062	2.76559	-2.30247	7.24049e-05	2.89778e-05
17953	-0.286519	2.02535	-2.71141	0.00274316	0.00182978
18063	1.29374	2.98034	-1.64757	0.0037912	0.00264198
18075	-2.68106	-4.17995	1.41596	0.00256258	0.00167676
18106	-3.54506	0.302396	-3.61305	0.00141186	0.000857939
18154	0.515352	2.01459	-1.70381	0.00540071	0.00393962
18186	-4.2524	-2.44535	-2.09633	0.000873739	0.000495534
18188	1.48467	2.5684	-1.42913	0.00179953	0.00112939
18315	-0.00665551	2.05551	-2.04443	1.25088e-05	3.94308e-06
18421	0.943319	2.31011	-1.67311	0.000216927	0.000101454
18440	-0.95728	1.61589	-2.04672	3.69133e-05	1.35605e-05
18476	0.619138	2.51205	-1.51343	0.000188265	8.68536e-05
18543	-0.036302	2.23283	-1.84349	0.000217069	0.000102805
18563	-4.74102	-2.466	-1.52627	0.00952335	0.00748517
18702	-1.47277	1.78925	-2.97772	1.82069e-06	3.48983e-07
18705	-0.559945	1.96728	-2.37464	0.00221829	0.00143261
18706	-0.0902255	1.63349	-2.31008	1.17292e-07	1.33094e-08
18721	0.769616	2.02071	-1.5339	0.00187271	0.0011827
18723	-4.15911	-1.07097	-3.08814	0.00607731	0.00451305
18788	0.90934	2.31237	-1.62102	0.0020345	0.00129201
18914	-2.38516	0.549846	-2.33369	0.00537643	0.00391249
18925	0.937411	2.92077	-1.77637	0.000926846	0.000530525
18946	-0.398182	1.68998	-2.04178	0.00039448	0.000201172
19001	-0.24873	1.40388	-1.46745	0.00759089	0.0058183
19016	-0.198364	2.81528	-3.63962	0.000217069	0.000102805
19077	0.281928	1.95382	-1.54626	0.00359176	0.0024863
19158	-0.143528	2.70856	-3.14159	6.30748e-05	2.49121e-05
19441	-2.36789	1.07452	-3.41696	2.90059e-06	7.39602e-07
19456	-0.0188421	1.83517	-2.26966	0.000171757	7.8222e-05
19637	-4.15168	-1.69337	-2.87841	0.000689655	0.000379499
19641	-0.812635	0.620012	-1.5629	3.77572e-05	1.40524e-05
19848	-3.96541	-2.18407	-1.80355	0.00080907	0.000451767
19857	-0.0105891	1.98239	-2.23528	0.000465783	0.000241003
19858	-1.26643	0.992355	-1.9905	0.000516724	0.000274945
19860	-0.200044	2.53803	-3.09393	2.90059e-06	5.98256e-07
19885	-0.393588	1.52806	-1.61457	0.000915931	0.000523275
19923	1.154	2.55956	-1.63803	0.000157953	7.06894e-05
19943	-3.12716	-0.597737	-2.06437	0.00187271	0.0011827
19950	1.23475	3.32627	-2.09151	0.00187271	0.0011827
19972	-3.9077	-2.49399	-1.43263	0.00280333	0.00187498
20100	-2.00499	-4.58261	2.462	0.00111164	0.000646216
20102	-0.300817	-3.63883	2.88238	3.563e-06	9.24898e-07
20172	-1.32293	-2.86188	1.42977	0.00216329	0.00137664
20236	-0.0446416	2.09818	-2.37502	3.77572e-05	1.40524e-05
20321	-1.96613	3.15933	-4.65369	2.90059e-06	7.39602e-07
20333	0.912354	2.48987	-1.5817	0.00753991	0.00576106

## Sheet: 026
dmr_id	median1	median2	median_change	padj	pval
164	-2.24779	-4.31576	2.09934	0.00230376	0.000818883
233	-3.80783	-2.49951	-1.64094	0.00861004	0.00423117
972	2.34871	0.853625	1.4583	0.00861004	0.00423166
1224	3.84215	2.22664	2.11552	0.00219222	0.000773994
1289	3.15673	1.64727	1.64193	0.000468019	0.000107735
1302	-1.83235	-4.25602	2.23472	0.00683823	0.00323206
1414	4.02149	2.45621	1.60676	0.00140771	0.000430942
1737	3.64248	2.22797	1.51729	0.000997935	0.000272679
2193	3.57425	1.95393	1.62285	5.33502e-05	5.43869e-06
2228	-4.38839	-1.92809	-2.33601	0.00481175	0.00204697
2442	-4.78275	-2.87049	-1.79162	9.76737e-05	1.1242e-05
2589	-3.4932	-2.18215	-1.75642	0.00613994	0.00275334
2695	3.71813	0.743523	2.34126	0.00481175	0.00204697
2859	-3.82756	-1.06666	-2.49357	0.0026895	0.000976354
4284	3.16856	1.31255	1.71977	0.00525476	0.00231712
4395	3.44969	2.46251	1.42179	0.00101813	0.000280329
4459	3.80413	1.90329	1.79538	0.000468019	0.000107735
4467	3.47151	1.09706	2.15368	0.00481175	0.00204697
5038	3.54008	0.811898	2.72818	0.000247689	4.13926e-05
5350	2.79318	0.914165	1.80432	0.00444451	0.00182564
5583	-4.55472	-2.21094	-2.24769	0.00332141	0.00125906
5707	2.67915	-0.974304	3.22745	0.00929455	0.00474036
5832	1.53832	-1.22126	2.812	1.35299e-05	8.53456e-07
5874	-0.689599	-3.05033	2.53456	0.00184816	0.000601687
5917	-4.04449	-1.19446	-2.7876	0.000800003	0.000206398
6083	-4.80762	-3.2031	-1.6735	0.00904872	0.00451489
6321	0.604642	3.06439	-2.41944	0.000297466	5.16676e-05
6739	3.0988	1.76967	1.50874	0.00683823	0.00323206
7048	-0.249889	-3.3421	3.36378	0.000333303	5.88885e-05
7629	0.418165	2.95531	-2.67561	0.00219222	0.000768964
7794	-1.19857	-4.46662	3.20976	3.80144e-07	7.37795e-09
8562	4.03157	1.72458	2.15079	0.00517332	0.00227038
8775	-4.20238	-2.90636	-1.48	0.00115432	0.000323981
8900	-3.90704	-1.53154	-1.76263	0.00693386	0.00329177
9507	3.13613	1.824	1.74499	0.00131922	0.00038492
9591	-4.70526	-1.97667	-2.66774	1.02029e-05	6.16138e-07
9593	-4.74003	-0.695418	-3.56965	7.63318e-06	4.26728e-07
9775	3.47974	0.680746	2.7165	0.00683823	0.00323206
9904	3.50279	2.36348	1.59002	0.00637737	0.00290175
9936	-4.12652	-2.27352	-1.79866	0.00740587	0.00356234
9972	3.24534	1.48284	1.68753	0.000468019	0.000107735
10033	-1.95015	-4.60055	2.29704	0.00794455	0.00384283
10721	-1.66231	-4.19548	2.81639	0.000188806	2.85908e-05
10741	3.64002	2.12631	1.69078	0.00219013	0.000754148
10881	-4.34368	-2.04411	-2.362	0.000429564	8.15804e-05
11418	0.0933893	-1.11001	1.41272	0.00332143	0.00128011
12353	-1.48769	-3.95112	2.55769	2.09566e-05	1.44723e-06
12679	-4.7069	-1.28593	-3.14758	0.00861004	0.00423117
13091	-4.14991	-1.1533	-2.87545	0.000468019	0.000107735
13517	-3.65739	-1.47053	-1.97704	0.00740587	0.00356234
13523	3.93937	2.56962	2.07111	0.00400011	0.00161679
13781	-4.36835	-2.67759	-1.93232	0.00037024	6.57466e-05
13954	2.61008	0.966067	1.81145	0.00161158	0.000515996
13967	2.43702	0.517384	2.20778	0.000371184	6.87994e-05
14063	-0.14308	2.01215	-2.22032	0.00303057	0.00111619
14137	-4.45329	-3.00532	-1.66624	7.24409e-05	7.60142e-06
14138	-4.46555	-1.54411	-3.17234	0.00481175	0.00204697
14400	3.40014	-0.0535472	3.54099	0.0090471	0.00450868
14477	-4.66188	-2.99863	-1.64841	0.000126474	1.79054e-05
14524	1.81486	0.408337	1.62448	0.00673582	0.00311318
14608	-1.09188	-4.38996	2.7063	0.000126474	1.79054e-05
14979	-4.15914	-1.15621	-3.13511	0.000468019	0.000107735
15405	-4.59131	-2.56656	-1.62772	0.00495486	0.00212414
15701	-3.17222	-4.88117	1.7787	0.00145153	0.000446524
15859	2.08972	-1.26968	3.15255	0.000749804	0.000188292
16286	3.29711	0.940807	2.46187	0.00683823	0.00323206
16499	3.24933	1.55888	1.62709	0.000958547	0.000261057
16548	2.49486	0.984102	1.44408	0.00481175	0.00204697
16639	-3.72876	-1.50793	-1.62926	0.00184816	0.000601687
16862	-3.8986	-1.50975	-2.14509	0.00481175	0.00204697
17018	3.2758	0.863444	2.07691	0.00304997	0.00113519
17826	3.28801	1.8976	2.13724	5.33502e-05	5.43869e-06
19502	-2.85359	-4.45377	1.63	0.00457173	0.00188199
19528	2.96211	1.57084	1.42606	0.00929455	0.00474036
20035	-1.52082	-4.77715	2.86985	0.00794455	0.00384283
20037	-0.350114	-3.59341	3.2458	0.00010191	1.17905e-05
20147	3.09636	1.50426	1.7484	0.00219013	0.000754148

## Sheet: 030
dmr_id	median1	median2	median_change	padj	pval
37	-4.07285	-1.65109	-1.53911	0.00618041	0.00451305
238	0.424309	2.49732	-2.32717	0.00182946	0.00111458
498	-2.11891	0.574495	-2.7753	0.00280151	0.00182978
523	-3.48495	-1.00651	-2.68134	4.7451e-07	6.32195e-08
644	-0.0713785	2.1119	-1.70389	0.000861449	0.000466563
693	-4.66889	-2.98041	-1.63734	9.18564e-05	3.36432e-05
746	-3.60227	-2.30655	-1.76058	0.00256877	0.0016356
747	-4.37147	-2.44984	-1.69773	0.00699138	0.00517662
784	-3.28995	-0.159174	-2.16649	0.00425289	0.00296311
832	-0.0972269	2.52038	-2.4112	0.00497497	0.00351854
842	0.789696	2.00552	-1.51155	0.00632219	0.00462465
880	-3.56053	-2.31237	-1.49735	7.72977e-05	2.7581e-05
1085	-0.282572	1.77162	-1.48183	0.00885187	0.00681174
1230	-1.34308	0.177655	-1.44903	0.000173081	7.17414e-05
1240	-3.483	-0.228313	-2.124	0.00679251	0.0050051
1241	-1.44439	1.9605	-1.94993	0.00884224	0.00674339
1274	-2.81331	1.1054	-3.23605	9.22545e-05	3.40009e-05
1315	0.943209	2.87955	-1.92181	0.00618041	0.00451305
1354	-4.12607	-2.62764	-1.93916	0.00296569	0.00194382
1403	2.40927	3.55062	-1.4714	0.0077508	0.0058497
1494	-3.42757	-1.7449	-1.66096	0.000355879	0.000167312
1510	0.348444	2.49622	-1.82518	0.000146889	5.81106e-05
1541	-2.13698	-1.15352	-2.1515	0.00742163	0.00555959
1652	-3.91607	-2.73744	-1.41202	3.76054e-07	3.99281e-08
1783	-4.01497	-2.13046	-2.20539	3.42525e-06	6.17847e-07
1841	0.546881	2.61578	-1.52465	0.00618041	0.00451305
1903	-2.13118	0.327968	-2.28235	0.0033031	0.00218437
2414	-2.90383	0.334147	-2.14837	0.0056581	0.00405656
2469	-1.99939	0.00159051	-2.08941	0.00776173	0.00585993
2577	1.61554	3.27657	-1.57414	0.00742163	0.00555959
2665	-3.88723	-2.28938	-1.46838	0.00164499	0.000986239
2788	-4.2135	-2.69545	-1.68052	0.00576381	0.00416177
3079	-3.20481	-1.40353	-1.82066	0.000260025	0.000114947
3207	-4.16934	-1.92382	-2.30534	1.31648e-05	3.52472e-06
3358	-3.90486	-2.33854	-1.51497	0.00108241	0.000605023
3510	-3.82651	-2.19403	-2.38427	0.00835049	0.00631722
3514	0.500204	2.08237	-1.53417	0.00282367	0.00184858
3520	-4.87111	-3.55851	-1.68523	0.000293288	0.00013302
3602	-2.88117	-0.87793	-1.41761	0.00883406	0.00670333
3610	-2.64392	-1.21548	-1.85993	0.00824889	0.00623614
3765	0.0808968	2.44388	-2.22733	0.0034535	0.00231643
3850	-0.100465	2.81909	-2.91086	0.00425289	0.00296311
4043	-2.25635	-3.92203	1.99168	0.000128519	5.02203e-05
4127	-2.904	-1.09766	-1.73831	0.00885187	0.00679929
4281	0.318092	2.73002	-2.33163	0.00182946	0.00111458
4633	0.686888	2.99296	-2.66936	1.42087e-07	1.32756e-08
4671	-0.594087	-3.76787	2.69067	3.00052e-07	3.06332e-08
4708	-0.0672276	2.11717	-2.03984	0.00367182	0.0024863
4740	-3.71883	-2.29362	-1.49223	0.00497497	0.00351854
4770	-0.253485	2.40776	-2.32972	4.4613e-05	1.47002e-05
4799	-3.86573	-0.90423	-2.85342	0.000569853	0.000291908
4889	0.588472	3.03954	-2.33747	9.54802e-06	2.40285e-06
5194	-2.96242	-1.21338	-1.73444	0.00574687	0.00412754
5580	-1.87207	1.73116	-1.68694	0.00546688	0.00391249
5701	2.22317	3.72721	-1.40215	0.00114797	0.000656027
5727	0.582687	2.05476	-1.40491	0.00145264	0.000857939
5830	-4.26043	-1.65021	-1.71532	0.00130428	0.000752011
6197	-4.94863	-3.01192	-1.62668	0.00280151	0.00182978
6294	-3.8944	-2.00017	-1.73196	0.00270017	0.00173878
6383	0.901244	3.0368	-2.35244	0.00387494	0.00264198
6384	-3.22559	0.292276	-2.68178	0.00280151	0.00182978
6614	-3.11719	-0.631399	-2.44797	0.00663377	0.00486273
6706	-1.52016	0.434963	-1.57142	0.00921758	0.00710492
6719	-4.16103	-2.65728	-1.54481	0.00425289	0.00296311
6783	1.467	3.05901	-1.67203	8.91811e-06	2.21018e-06
6824	-2.53714	0.813027	-1.7362	0.00497497	0.00351854
6868	-1.21569	2.24301	-3.70594	0.00191243	0.0011827
7127	1.8321	3.13817	-1.40309	0.00634538	0.00464486
7151	-4.43294	-3.25507	-1.44855	0.000140716	5.5166e-05
7206	0.00472828	1.95389	-1.87644	0.00136389	0.000794384
7474	2.00052	4.45388	-2.43934	9.09974e-05	3.32821e-05
7522	-3.83911	-2.91704	-1.45148	0.00576381	0.00416163
7787	-4.18493	-1.15797	-3.29318	0.000831285	0.000448954
7832	1.10195	2.45837	-1.76162	0.00885187	0.00681174
7833	0.411572	2.55102	-1.69326	0.000173081	7.17414e-05
7885	-4.30955	-3.14826	-1.62147	0.000186988	7.8222e-05
7993	-3.93883	-2.02636	-1.57796	0.000538887	0.000274495
8183	-2.50123	-1.33957	-1.55731	0.00742163	0.00555959
8248	-4.43754	-2.30391	-1.60638	0.00499291	0.00353377
8287	-3.88082	-2.27704	-1.55613	0.00883756	0.00671501
8328	-3.92485	-2.11276	-1.57684	0.00474202	0.00332595
8526	-3.11346	1.53418	-4.21538	0.000173081	7.17414e-05
8530	-3.13816	-0.641136	-3.05647	0.00871185	0.00660615
8599	-1.83815	2.1317	-3.39236	0.00884224	0.00674339
8661	-3.26289	-1.10165	-2.57076	0.00421834	0.00291403
8787	-2.55671	-4.21255	1.4177	3.56272e-05	1.10823e-05
8851	2.11466	3.48276	-1.4303	0.000121174	4.62367e-05
8934	-1.27668	0.723064	-2.76982	0.000736383	0.000392437
8975	-2.51775	1.31165	-3.55824	0.000700711	0.00037128
9030	-0.296466	3.16888	-3.51482	9.29358e-12	1.32833e-13
9039	-3.03445	-0.718521	-1.78314	0.000165424	6.67523e-05
9071	0.194384	1.79389	-1.47387	0.00424589	0.00293679
9075	-1.86979	0.0478469	-1.44445	0.00618041	0.00451305
9077	0.148436	1.69918	-1.64428	0.000861449	0.000466563
9106	-0.697704	1.5653	-2.30643	1.15474e-05	3.04452e-06
9384	0.873972	2.22446	-1.44185	0.00191243	0.0011827
9583	-3.02417	-1.31321	-1.67396	0.00106633	0.000595492
9880	-0.277294	1.97349	-2.02893	0.0014638	0.000865277
9939	-3.3445	0.56734	-3.51414	0.00387494	0.00264263
9993	1.45857	3.01538	-1.49072	0.00103684	0.000577964
10063	-4.57269	-2.65062	-1.7708	0.00189619	0.00116007
10080	-4.32936	-3.3719	-1.41393	0.00425289	0.00296311
10141	-4.31144	-2.85271	-1.43269	2.3406e-05	6.89758e-06
10148	0.517508	2.75415	-2.22987	0.000415713	0.000201172
10218	1.22312	2.53382	-1.50923	0.00427108	0.00298365
10393	-2.95997	0.564509	-2.25964	0.00766185	0.00576106
10417	-0.815164	0.435422	-2.43707	0.00576381	0.00416177
10432	1.14618	2.3834	-1.91067	1.19635e-05	3.16645e-06
10477	-0.446472	1.1262	-1.7688	0.00191243	0.0011827
10481	-1.45461	1.36866	-3.33206	3.52655e-06	7.69575e-07
10494	1.1637	3.38855	-2.76113	0.000173081	7.17414e-05
10496	-0.361799	2.91317	-3.14878	0.000536239	0.000268667
10674	-3.38033	-1.29926	-1.49444	0.00480056	0.00337313
10780	-1.05662	1.21262	-1.86178	0.00145264	0.000857939
11152	1.34453	2.8916	-1.82884	0.00280151	0.00182978
11233	-0.40103	1.44002	-1.5336	0.00086509	0.000468756
11279	-0.662268	1.64397	-1.87224	0.000903864	0.000495534
11281	0.960501	2.74533	-2.05392	0.000170575	6.90921e-05
11332	1.12869	2.9361	-1.68653	0.00114797	0.000656027
11333	0.253645	1.97772	-1.69047	4.20637e-05	1.35233e-05
11371	-4.56144	-2.65392	-1.84035	0.00870572	0.00659484
11451	0.447502	2.93193	-2.14646	0.00666434	0.00490555
11501	-2.9253	0.350513	-2.99901	0.00367182	0.00247897
11578	-2.6062	1.9059	-4.12406	6.35939e-05	2.21881e-05
11601	-4.44035	-1.6832	-2.59742	0.000291909	0.000132246
11602	-3.94538	-2.19886	-1.96221	0.000196232	8.29903e-05
11654	1.01832	2.73735	-1.45749	0.000781138	0.000421272
11678	-3.06893	1.90931	-2.72801	0.00262362	0.00167676
11750	-3.96824	-1.85831	-1.55989	0.00114797	0.00065348
11766	-0.380162	2.04312	-2.04933	0.000381036	0.000180695
11892	-3.83613	-1.12726	-1.9112	0.00964292	0.00745
11944	-3.84976	-2.61894	-1.58846	0.00145264	0.000857939
11951	0.139654	2.30979	-2.23674	0.00191243	0.0011827
11952	1.37194	2.68217	-1.55111	3.13187e-05	9.60824e-06
12009	-3.65748	-1.40406	-1.84695	0.00173006	0.00104122
12025	0.8087	2.33545	-1.48519	0.00387494	0.00264198
12133	0.0465077	2.37816	-2.80529	1.0462e-05	2.64354e-06
12197	3.06741	2.28707	1.42133	0.00510143	0.00363662
12294	-2.03565	0.390393	-2.50026	0.00749163	0.00561777
12400	-0.321627	1.6678	-2.14261	0.00226944	0.00143302
12521	-3.56474	-0.122359	-2.117	0.00383823	0.00260976
12542	-1.58812	1.90768	-3.31286	0.00458637	0.00321093
12701	-3.87481	-1.57093	-1.69039	0.00618041	0.00448418
12890	-3.19764	-1.6926	-2.09544	0.00424589	0.00293679
12980	-4.49305	-2.63482	-1.48476	3.42525e-06	6.13783e-07
13245	-3.8611	-2.02405	-2.33909	0.00421834	0.00291403
13405	0.756926	2.21064	-1.41523	0.0034535	0.00231643
13451	0.108782	2.9839	-2.52039	0.00618041	0.00451305
13490	-4.44259	-2.68628	-1.55514	2.00794e-06	3.17744e-07
13766	-2.75815	1.54534	-3.40384	0.000903864	0.000495534
13867	1.34526	2.62886	-1.51376	0.00145264	0.000857939
13936	-2.03873	1.08056	-2.73931	0.00114797	0.000646216
13959	2.07569	3.67385	-1.55724	0.00189619	0.00116007
14234	-2.99988	0.814938	-2.11307	0.00885187	0.00681174
14282	-4.12915	-2.85758	-1.78619	0.000231533	9.93972e-05
14442	-3.68749	-1.50477	-2.90054	0.00766185	0.00576106
14490	-2.18427	1.98613	-2.01146	0.00029056	0.000130819
14784	1.108	2.0969	-1.48267	0.0012171	0.000698634
14786	-1.64601	1.12572	-2.83185	0.00280151	0.00182978
14917	-2.77638	1.82353	-3.2289	0.00499291	0.00353378
14932	0.520451	2.52243	-1.73578	0.00547656	0.00392361
14955	2.2375	3.14911	-1.44196	0.00367182	0.0024863
15026	1.15375	2.88908	-1.51867	0.0034535	0.00231643
15118	-2.97356	0.892195	-2.23512	0.00885187	0.00681174
15209	-3.83016	-2.33857	-1.52508	0.00576381	0.00416163
15216	-0.17145	1.84135	-1.77068	0.00742163	0.00555959
15392	-2.68129	-0.311983	-2.76115	0.000335798	0.000156071
15437	1.40671	3.0456	-1.59979	0.000538887	0.000274392
15448	-2.42218	-0.0224437	-2.59334	0.00152499	0.000904561
15500	-3.82771	-1.56575	-2.27323	0.0077508	0.0058497
15665	1.1939	3.02875	-1.67206	0.000994852	0.000553034
15683	0.530036	2.03132	-1.93355	0.000173081	7.17414e-05
15696	0.252382	2.45614	-1.86439	0.000700711	0.00037128
15772	-3.02073	-1.62536	-1.4091	0.00335186	0.00221917
15864	-2.44213	-4.8981	2.40883	3.99294e-08	3.32734e-09
15938	3.90689	0.842646	2.87683	0.000398798	0.000190034
15962	-4.69718	-2.88801	-1.53237	9.82935e-05	3.64775e-05
16186	-0.963731	1.84215	-2.84996	0.000312017	0.000144222
16284	-3.29038	-0.253524	-3.09589	1.13304e-05	2.95841e-06
16364	-3.32836	-1.40607	-1.88032	0.00692024	0.00511335
16366	-4.00971	-0.25393	-2.82149	0.00884224	0.00674339
16581	2.01865	3.49038	-1.57439	0.00510143	0.00363662
16593	-2.81979	-0.539818	-1.8629	0.00166597	0.000999669
16607	0.197591	2.8451	-2.75371	0.000186988	7.8222e-05
16672	-3.89228	-1.01483	-2.51565	0.00314765	0.00207754
16706	-1.74787	1.72804	-2.24683	0.000569853	0.00029185
16893	-3.90642	-2.33063	-2.25382	0.000237503	0.000104264
16952	-0.693375	1.99814	-2.19187	0.00884224	0.00674339
17108	-4.10464	-2.29715	-2.04418	0.00103684	0.000577964
17136	-1.29231	1.35876	-2.72627	0.00742163	0.00555959
17141	0.802642	1.97733	-1.40719	1.82413e-05	5.17722e-06
17148	-4.28812	-2.2014	-1.56506	0.000126978	4.89183e-05
17190	-1.89987	1.16562	-3.2372	3.83754e-07	4.98547e-08
17245	-0.185033	1.77322	-1.5115	0.00140742	0.000821173
17308	-4.32889	-2.97848	-1.464	0.000463846	0.000226886
17351	-1.28024	1.31189	-2.06517	0.00741315	0.00550026
17459	-4.14846	-2.37333	-1.67946	0.00100057	0.000557234
17646	0.294324	2.66898	-2.45767	0.000119165	4.53179e-05
17655	1.27342	2.42755	-2.24369	0.000636269	0.000328532
17683	0.387621	1.72965	-1.47808	0.00771702	0.0058183
17731	-0.595321	1.00936	-1.62849	0.000637565	0.000329848
17736	1.31783	2.69854	-1.50328	0.000646645	0.000337516
17744	-1.67932	0.687397	-3.30598	0.00497497	0.00351854
17779	-4.45217	-1.90992	-1.8057	0.00730042	0.0054129
17780	-0.248357	2.20009	-2.9534	0.00175718	0.00105978
17837	-1.83942	1.15056	-2.95318	9.22545e-05	3.40009e-05
17864	-0.891134	1.76501	-2.4234	0.000994852	0.000553034
17928	1.87218	2.76883	-1.51703	0.000700711	0.00037128
17947	2.00512	3.62781	-1.85927	0.000188373	7.93783e-05
18009	0.636265	3.12814	-2.05384	0.00666434	0.00490555
18181	0.718342	2.30939	-1.52561	0.000435792	0.00021278
18189	0.752385	2.81483	-1.73719	2.3406e-05	6.89758e-06
18263	-3.41372	-0.657005	-2.78136	5.7383e-08	4.90641e-09
18265	0.492428	1.61141	-2.62228	0.00742163	0.00555959
18276	-3.3949	-1.5824	-1.80292	0.00359371	0.00242149
18279	0.010157	2.0087	-1.64875	0.000781138	0.000421272
18342	-2.21047	-0.186234	-1.71572	0.00885187	0.00681174
18412	-2.91986	0.813451	-1.58364	0.00174067	0.00104849
18446	-1.59193	0.394394	-2.15729	0.000930808	0.000510912
18473	1.78719	2.9204	-1.55377	0.0022773	0.00144279
18570	-0.38131	2.18689	-1.92729	4.72606e-05	1.56463e-05
18657	1.25814	3.68889	-1.9634	0.000173081	7.17414e-05
18679	0.857808	2.28554	-1.67072	0.00182946	0.00111458
18708	1.24445	2.95849	-1.52795	0.00282367	0.00184858
18729	1.15506	2.59174	-1.47407	0.00017028	6.88419e-05
18735	1.17607	2.71864	-1.54598	0.00114797	0.000656027
18851	0.0846423	1.78141	-2.14262	0.000903864	0.000495534
18854	0.524631	2.85773	-2.3394	0.000186988	7.8222e-05
18977	-0.0567757	2.27881	-2.70527	0.000126978	4.95534e-05
18980	0.780337	2.29336	-1.72269	0.00273824	0.00176678
18993	-4.02499	-0.624629	-2.67243	0.00280151	0.00182978
19008	-3.88693	-1.8678	-2.06542	0.000336443	0.000156457
19172	-3.87968	-3.12177	-1.48913	0.00282245	0.00184418
19271	-3.94658	-2.27414	-1.41724	0.00349574	0.00234923
19312	-1.84565	0.460259	-2.74016	0.0026876	0.00172931
19449	-0.700374	2.1747	-3.26206	0.0077508	0.0058497
19479	-3.48296	-1.42546	-1.56782	0.00164499	0.000986239
19490	-3.1622	-0.417012	-2.43128	0.0034535	0.00231643
19571	0.866292	2.31045	-1.45037	0.00106633	0.000595492
19632	-1.58038	1.39514	-2.78703	0.00885187	0.00681174
19796	-3.76731	-1.7388	-1.74789	0.00136389	0.000794384
19888	-0.463952	-4.16051	2.95516	6.02681e-08	5.18386e-09
19947	-4.16777	-2.69563	-2.10209	6.18788e-06	1.43793e-06
19962	-2.11257	0.742502	-2.71005	0.00966608	0.00748517
20119	-2.95763	-0.208811	-2.42022	9.27819e-05	3.43847e-05
20178	-2.07545	1.28266	-3.31321	1.13304e-05	2.95841e-06

## Sheet: 031
dmr_id	median1	median2	median_change	padj	pval
170	-2.2806	1.28208	-2.90001	0.000567918	0.00029185
210	0.611045	2.19495	-1.41445	0.00629779	0.00448418
314	-2.39055	-4.65048	2.26316	0.00902407	0.00674339
335	0.487689	2.53425	-2.28917	8.5756e-05	3.43847e-05
367	3.18119	-0.294001	2.65106	0.000864125	0.000472032
453	1.18258	2.94362	-1.88765	0.000696685	0.00037128
636	1.57482	3.03237	-1.50299	0.00433998	0.0029666
688	-0.765095	2.68278	-3.11568	1.84252e-05	6.03693e-06
691	0.0919877	3.10776	-2.50965	0.0026294	0.00167676
729	0.532734	2.84383	-2.01359	0.00149726	0.000889334
768	-3.23636	-1.22918	-1.86261	0.00765707	0.00561777
838	-1.06814	1.40363	-2.42982	0.00888479	0.00660615
916	-0.11882	3.07584	-2.54935	6.24966e-05	2.38923e-05
1057	-0.341789	-4.14752	1.68666	0.000134783	5.69172e-05
1093	-3.69014	-2.00083	-1.65507	0.00297968	0.00194382
1121	2.7001	0.76681	1.90628	0.00430336	0.00291403
1280	-0.0684478	1.89802	-1.99653	0.000538266	0.000274392
1295	0.282104	2.69575	-2.36014	0.00132061	0.000769977
1327	-0.186954	2.45632	-2.3522	9.07932e-08	9.91721e-09
1363	-2.92539	3.04543	-3.36061	0.00902537	0.00681174
1407	0.728666	2.5498	-2.11401	2.92026e-06	6.17847e-07
1559	-3.83269	-1.74798	-1.64069	0.00629779	0.00451305
1835	-2.85036	-4.58474	1.58547	2.64209e-05	9.10047e-06
1948	0.880558	2.69138	-2.28797	0.00282216	0.00182978
2180	-1.45717	-4.03712	2.64458	0.000124143	5.21595e-05
2472	1.13171	2.79339	-1.72371	0.000538266	0.000274392
2638	0.78995	2.03094	-1.65498	0.00902149	0.00671501
3150	-2.19354	3.08355	-3.19343	8.50816e-05	3.40009e-05
3151	-0.925803	2.80174	-2.14095	0.0075888	0.00555959
3155	1.06949	2.35496	-1.40128	0.00902537	0.00681174
3320	-2.46598	0.742502	-2.74552	0.000567918	0.000291908
3474	-0.2414	1.76173	-2.04514	0.00349234	0.00231643
3669	-0.403525	1.43249	-1.47873	0.00433998	0.00296311
3713	-0.905272	1.48747	-2.16664	0.00430336	0.00291403
3916	-1.09678	1.70159	-2.6358	0.00679244	0.00490555
4500	1.97822	3.28462	-2.38	0.0055933	0.00393962
5271	-2.2188	-5.03909	2.27995	1.36032e-05	4.19955e-06
5814	2.29418	3.41041	-1.78465	0.00433998	0.00296311
6309	3.50946	1.73281	1.70702	0.000631918	0.000328998
6697	-1.0049	1.05609	-2.06098	0.00531016	0.0037232
6767	1.07435	2.94472	-1.60886	5.96444e-06	1.65445e-06
6911	0.116914	2.8504	-2.08724	7.85735e-06	2.24346e-06
6974	-1.05074	2.64479	-2.17486	0.00496103	0.00342551
7005	1.61554	3.32698	-1.51837	0.000111103	4.51018e-05
7177	-2.54487	-4.59185	1.96672	1.10003e-06	1.95945e-07
7456	-3.34247	-4.59614	1.80891	0.00142823	0.000835766
7550	0.398666	1.48722	-1.99088	0.000631918	0.000328998
7592	1.70453	2.93782	-1.40544	6.19072e-05	2.36175e-05
7686	3.43769	1.66349	1.57556	0.000111103	4.51018e-05
7913	0.250032	2.32939	-1.51258	0.0012872	0.000747408
7985	-0.0948118	3.30483	-3.26787	0.0022738	0.00143261
7990	-0.895629	2.32266	-3.33626	0.00705153	0.00511335
8128	0.195769	3.3696	-2.33921	0.00507227	0.00351854
8147	-0.59037	-2.54247	1.73884	8.50816e-05	3.40009e-05
8272	0.217992	2.58915	-2.32154	0.00902537	0.00681174
8631	-3.86978	-1.58993	-3.01714	0.00430336	0.00291403
8756	0.0615229	3.19338	-2.85052	0.00349234	0.00231643
8785	0.0521728	-4.995	5.06185	3.28957e-08	3.32734e-09
8932	-0.497534	2.23461	-2.63668	0.000631918	0.000328998
9016	0.511728	2.56278	-1.58557	0.00179207	0.00107878
9017	-1.26685	1.49332	-2.67215	0.00519656	0.00363662
9021	1.02512	2.35944	-1.54935	0.000214725	9.58851e-05
9033	-3.40935	-2.20226	-1.61444	0.0013268	0.000773939
9128	0.601329	3.39383	-1.50613	0.00135875	0.000794384
9140	-0.769448	2.18084	-2.99559	6.5969e-09	4.83644e-10
9163	0.662589	2.6403	-1.59472	0.00496103	0.00342551
9172	0.656182	2.58462	-1.58623	0.000864125	0.000472032
9203	-0.0633394	2.33994	-1.73339	0.00985499	0.00748517
9213	0.0491921	1.99647	-2.73628	9.68793e-07	1.68912e-07
9486	-0.372548	2.84493	-2.63221	0.000856622	0.000466563
9520	-2.74721	-4.54892	1.76324	0.00430336	0.00291403
10138	-2.67658	0.0893641	-1.83431	0.00692516	0.0050051
11055	-0.178503	2.05871	-2.26268	0.00113661	0.00065348
11189	-1.22752	1.98216	-2.75033	2.60074e-05	8.93724e-06
11193	-0.512319	2.5658	-3.09379	0.000224649	0.000101454
11198	-1.46312	2.06368	-3.36527	0.000642	0.000337516
11338	-1.83389	0.588061	-2.09769	0.00144765	0.000857939
11372	0.859418	2.69619	-1.59416	0.00284297	0.00184858
11436	-0.304533	1.61445	-2.16959	1.10003e-06	1.95155e-07
11665	3.46829	1.65348	1.42684	0.0075888	0.00555959
11774	0.567459	2.4503	-2.37173	0.000139845	5.97259e-05
11822	0.00857212	2.19697	-2.48283	3.20214e-07	4.98547e-08
11846	0.482739	2.35132	-2.08062	0.0022738	0.00143261
12485	-1.78169	-3.43744	1.47318	0.00888479	0.00660615
12495	-0.10991	2.83909	-3.00722	6.05566e-06	1.69029e-06
12879	0.703596	-3.88659	2.7842	0.00192381	0.00117644
12944	-3.81422	0.513387	-3.97077	0.00192381	0.0011827
13018	2.77637	0.303605	2.09634	0.000164187	7.17414e-05
13021	-3.29768	-2.09169	-1.4081	0.00183368	0.00111458
13118	-1.22715	2.46438	-2.17708	0.00782961	0.00576106
13353	-2.75645	0.0930587	-2.62828	3.7694e-05	1.33451e-05
13362	0.90576	3.14041	-1.55818	0.00135875	0.000794384
13377	0.609566	2.01397	-1.561	0.00192381	0.0011827
13419	-3.05835	2.23682	-5.15791	2.92026e-06	7.39602e-07
13681	-3.17725	-4.49264	1.6839	0.00104794	0.0005906
14076	3.08384	1.57739	1.4204	0.000160091	6.88419e-05
14261	-4.44976	-2.78813	-1.48228	0.00864152	0.00640223
14270	0.865508	3.02588	-2.52999	0.000140312	6.00377e-05
14297	-4.09098	-1.62395	-1.49497	0.00106731	0.000602085
14384	0.265319	1.9166	-1.62731	0.00386858	0.0025928
14555	0.878876	2.82159	-1.96568	3.87579e-05	1.40524e-05
14702	0.0204993	2.78737	-2.76687	0.00113661	0.000656027
14841	-1.12515	2.56699	-2.58454	0.00371707	0.0024863
15041	0.61662	2.28096	-1.75555	0.00902407	0.00674339
15045	-0.0515006	2.59683	-1.93853	0.00349234	0.00231643
15100	-0.295648	2.27113	-2.61026	0.00183368	0.00111458
15194	-1.59997	-3.32516	1.43702	0.00644633	0.00462465
15547	0.333333	1.85522	-1.7836	8.69895e-07	1.50742e-07
15564	2.73611	3.1696	-1.50197	0.00332936	0.00218437
15661	-1.97932	-4.51018	2.19796	0.00467192	0.00321093
15789	-0.973722	1.24383	-2.04908	0.00433998	0.00296311
15826	-3.32317	-0.151058	-3.09116	5.3048e-05	1.98276e-05
16121	-0.111864	-3.16831	3.12061	1.63164e-05	5.2938e-06
16181	-4.64368	-3.10832	-1.45052	0.0058842	0.00416177
16430	-2.11745	0.585745	-2.8288	6.56974e-05	2.53262e-05
16447	-0.586551	2.27353	-2.31111	0.00629779	0.00451305
16479	0.782395	2.63929	-1.49423	0.00679244	0.00490555
16638	-0.401553	1.71643	-2.11034	0.0058842	0.00416177
16725	-0.125942	1.8841	-1.92372	0.00507227	0.00351854
16948	0.202124	2.35872	-1.9879	2.08785e-05	6.89758e-06
16994	-3.05633	-0.000899959	-3.45918	0.000160473	6.90921e-05
17014	-2.14689	-4.56549	2.54013	5.78033e-08	6.07158e-09
17490	0.627875	2.20577	-1.98656	0.000482227	0.000240535
17949	0.799505	2.63025	-2.15571	0.00178339	0.0010726
17967	-2.54253	-5.10849	1.96313	0.000177932	7.8222e-05
18088	3.23424	1.41452	1.53633	0.0027556	0.00176678
18299	0.760225	2.62641	-1.48642	5.43093e-06	1.4792e-06
18385	-3.37291	-1.86313	-1.58999	0.00221431	0.00137664
18644	-0.548983	1.91726	-2.82512	0.000410553	0.000201172
18649	-1.62072	0.945936	-1.69183	0.0022738	0.00143302
18675	1.9624	3.3522	-1.90688	0.00135875	0.000794384
18678	0.873631	2.20386	-2.00945	0.00485911	0.00334606
18767	-4.07523	-1.25022	-1.96147	0.000204381	9.10478e-05
18798	-2.19829	-4.81211	2.62178	0.00349234	0.00231643
19019	1.43102	-2.39514	2.06221	0.00388254	0.00260423
19020	0.348379	2.00009	-1.50416	0.000709622	0.000379499
19215	-3.85621	-2.9308	-1.63148	0.000103043	4.16455e-05
19243	-2.65263	1.3737	-2.93475	8.71573e-06	2.51875e-06
19791	2.79768	1.77264	1.44008	0.00349234	0.00231643
19867	-3.80056	-1.63572	-1.9181	0.00221269	0.00137445
19883	-1.49124	1.89444	-3.13735	0.00282216	0.00182978
19991	-0.294763	1.62862	-1.92338	0.00939724	0.00710492
20072	2.37478	3.48823	-1.84129	0.00789025	0.0058183

## Sheet: 050
dmr_id	median1	median2	median_change	padj	pval
65	2.3543	-0.50852	2.04901	0.00399043	0.00298365
149	-0.609159	-4.14448	3.84609	2.36462e-06	7.39602e-07
492	-0.526215	-2.85929	2.39466	0.00270594	0.00194382
579	-1.22892	-3.56903	1.91159	4.06592e-09	3.58013e-10
1187	2.88916	0.936802	1.49331	0.000280275	0.00015713
1420	-1.66651	-3.61677	3.87991	0.00592921	0.0046038
1489	-3.34129	0.225777	-2.06233	0.00207175	0.00144279
1880	0.298531	-3.04587	2.33155	0.00148376	0.000986239
2283	-2.82152	-5.02897	1.51557	0.00840867	0.00674339
2329	-0.784447	-3.82203	3.52919	0.000454698	0.000268667
2775	-0.930385	-3.63731	2.78962	2.60824e-09	2.20382e-10
2863	-0.337132	-3.6268	3.16999	4.84743e-07	1.0606e-07
3776	-1.89514	-4.13654	2.29593	6.86439e-06	2.42584e-06
4494	-0.461506	1.66155	-1.94741	0.00581679	0.00451305
4699	-1.34741	-3.42912	1.84954	1.1978e-07	1.8537e-08
4744	-0.154716	-3.34225	3.12788	0.00011557	5.81106e-05
5678	-1.34647	-2.54259	2.11328	0.00391815	0.00291403
5760	-3.16801	-1.45675	-1.41699	0.000259862	0.000144222
6370	-1.16942	-2.6883	1.40207	0.00399043	0.00298365
6402	2.58753	-0.709513	2.73306	0.000308846	0.000174247
6669	2.49379	0.850008	1.44233	0.00840867	0.00674339
6818	-0.888655	-2.83813	2.03627	0.00288899	0.00208559
7552	0.181286	-4.12352	2.32146	6.5025e-06	2.2806e-06
7625	3.17721	1.86903	1.52852	0.000607337	0.00037128
7864	2.90879	1.44501	1.74937	0.0010216	0.000656027
8127	-1.31288	-3.87265	2.16692	0.00623413	0.00486273
8553	-0.229417	1.58707	-1.97794	1.34762e-05	5.2938e-06
8659	-0.755441	-2.66307	1.6749	0.000619279	0.000379499
8963	-0.0171188	-2.97431	2.59859	1.17155e-08	1.17746e-09
9001	2.2939	0.447042	1.43426	0.00845638	0.00681174
9160	-0.0561027	-3.62452	3.4876	2.62646e-35	7.78672e-39
9365	-1.55886	-4.17681	2.62148	0.00255987	0.00182978
9494	0.0226295	-3.30768	2.85083	2.31148e-06	5.92398e-07
9580	3.1343	1.66041	1.54047	0.000348691	0.000201172
9642	-2.50558	-3.42764	1.48913	0.00288377	0.00207754
9678	-3.54877	-0.8415	-2.18997	0.0095501	0.00771256
10289	0.103782	-3.1143	3.2586	0.0010216	0.000656027
10359	-0.513038	-4.21026	3.46394	8.0395e-06	2.88402e-06
10470	0.376056	-1.91418	2.84414	0.00165355	0.00112214
10761	3.31314	1.74189	1.4458	9.4466e-07	2.22932e-07
10887	-0.897426	-3.72132	1.60988	0.00408873	0.00305958
11115	-2.53313	-3.75732	1.62803	0.00927193	0.00748517
11250	0.589395	-2.17169	1.44704	0.00454712	0.00342551
11389	0.614151	2.29486	-1.53898	8.78304e-07	2.04668e-07
11434	3.11447	-0.192367	3.30683	0.00840867	0.00674339
11905	2.65764	-0.356877	2.35875	0.00467245	0.00353377
12406	-1.37447	-3.56896	2.1938	0.00971497	0.00786587
12819	1.23856	-1.61668	2.85772	0.00244877	0.00172931
13141	-2.07641	-3.81155	2.06919	0.000791024	0.000495534
13349	-1.95336	-4.06893	1.78517	2.19414e-07	3.53873e-08
13518	2.31024	0.107927	2.2192	0.00317357	0.00231643
13575	-2.76946	-4.30114	1.41576	9.24129e-06	3.45213e-06
13882	-1.06265	0.642666	-1.66451	0.000417268	0.000244695
14340	-3.66746	-2.27684	-1.6708	0.000750461	0.000466563
15032	-0.0817277	2.31667	-2.78661	0.000791024	0.000495534
15137	-0.120539	-2.87802	1.93025	0.00200579	0.00137664
15156	0.197705	-1.59641	1.92248	0.00733101	0.0058183
15712	0.0950614	-2.68262	2.35747	0.00704981	0.00555959
16161	-1.61599	-2.67773	1.65288	1.5754e-05	6.25396e-06
16358	1.42493	3.11759	-1.58194	0.00477475	0.00363662
16679	0.279107	-1.52127	1.54772	0.00108497	0.000699299
17174	-0.432294	-3.1488	2.85115	0.00736507	0.0058497
17179	-2.20787	-3.99454	1.78564	9.03193e-10	5.94452e-11
17194	-1.06555	-5.09414	3.22058	7.77746e-05	3.71464e-05
17281	0.521606	-3.60027	3.70289	3.80953e-07	7.88334e-08
17729	1.13653	-0.65363	1.62422	0.000496586	0.000297687
18004	-2.63928	-3.86342	1.96579	0.00391815	0.00291403
18044	-2.90864	-4.1069	1.44926	2.40496e-07	3.99281e-08
18156	0.248334	-2.84254	2.75661	0.00477475	0.00363662
18352	-1.3858	-3.63938	2.37926	0.000348691	0.000201172
18726	-1.68746	-4.44726	2.24717	0.000129555	6.57187e-05
18907	-1.43725	-3.23809	2.81043	0.00727247	0.00576106
18922	-1.98495	-4.0586	1.87012	1.89818e-06	4.7778e-07
19199	1.12844	-4.74378	5.67835	2.50985e-07	4.98547e-08
19727	0.0463303	-2.73711	2.48512	0.00125874	0.000820253
19954	-1.39982	1.22594	-2.42347	0.000750461	0.000466563
19976	-1.72405	-4.26554	1.95405	7.23516e-05	3.43847e-05
20064	-1.74117	-3.66638	1.83506	4.46047e-06	1.4826e-06

## Sheet: 052
dmr_id	median1	median2	median_change	padj	pval
294	-1.87619	-3.32847	2.25823	0.00170266	0.00114923
466	0.402077	1.67029	-1.6622	0.00968353	0.00786587
641	-0.331464	-2.85588	2.56887	2.60785e-07	5.38772e-08
797	-1.77114	-3.96941	1.84277	0.00839463	0.00674339
973	3.31256	0.231265	2.08622	0.00206353	0.00143302
1079	-0.322053	-4.95828	5.73947	7.17027e-05	3.32821e-05
1237	1.8528	2.86715	-1.62719	0.00968353	0.00786587
1567	2.97371	-2.4617	2.14499	0.00256507	0.00182978
1584	-1.41849	-3.14734	1.6952	0.0012175	0.000794384
1872	1.26302	-0.96006	2.19373	3.10685e-05	1.2856e-05
2028	3.26698	1.60801	1.60778	0.00271581	0.00194382
2087	0.981147	2.74838	-1.74573	0.000323294	0.000180695
2218	-0.307046	-2.91607	1.50425	0.0039622	0.0029666
2291	-0.0955291	-3.42729	2.90774	1.01964e-08	1.00282e-09
2350	-0.0407836	-4.11949	3.76196	0.00141369	0.000933418
2377	0.0883028	-4.26221	3.16224	2.76376e-05	1.13617e-05
2396	-0.92243	-3.5215	2.35833	0.00318045	0.00231643
3206	0.574365	-3.06787	3.32483	0.000779291	0.000480894
3379	0.0556002	-1.92658	1.98962	0.00246583	0.00173754
3647	3.28008	1.6303	1.54473	0.00390671	0.00291403
3731	2.66526	0.695669	1.67547	0.00102093	0.000656027
3748	-1.06559	2.06876	-2.86806	0.00390671	0.00291403
3913	-1.48825	-2.8747	1.50568	0.000496437	0.000291908
4097	-1.43241	-3.56331	2.50512	2.34912e-06	7.39602e-07
4309	-2.15614	-3.51396	1.7137	0.000119775	5.97259e-05
4424	0.277164	-3.23322	2.45757	0.000209156	0.000111445
4830	-2.48763	-3.99057	1.60174	0.00194648	0.00133189
4967	1.9581	-1.23578	2.32452	0.00733057	0.0058183
5245	0.150908	-3.60508	4.29346	2.50881e-08	3.32734e-09
5452	1.18459	-3.03886	4.00986	0.000345455	0.000193703
5473	1.67764	-0.167529	2.94273	0.000193786	0.000101454
5476	-0.0923596	-2.34467	1.90511	0.00462275	0.00349305
5492	1.0998	-3.06817	3.84028	5.96335e-06	2.07957e-06
5825	-0.164109	-4.07885	2.50927	0.000190731	9.93972e-05
5882	-1.78268	-3.51976	1.94644	0.000246431	0.000133967
5975	-0.278103	-3.95411	3.31789	0.000140989	7.17414e-05
6359	0.52562	-4.14727	3.94048	4.5791e-07	9.97093e-08
6591	-0.0848315	2.68408	-2.41847	0.00703652	0.00555959
6735	-0.0536962	-5.65821	4.38462	3.83011e-05	1.64e-05
6740	-0.0931103	-2.79768	2.3528	0.000105874	5.21595e-05
6931	-0.226322	-3.64447	4.26406	0.000241172	0.000130819
6961	2.26027	-1.90115	4.25734	0.000354041	0.000201172
7017	0.980174	-2.81651	3.1271	9.65413e-07	2.28978e-07
7066	0.499768	-3.05692	3.55669	2.44508e-07	4.98547e-08
7070	0.571411	-2.23215	2.30405	0.00256507	0.00182978
7144	2.7167	1.36584	1.62514	0.00318045	0.00231643
7575	-2.40319	-3.76829	2.50569	7.35084e-05	3.43847e-05
7582	2.95754	1.22807	1.72948	0.00541111	0.00416177
7671	0.603461	-2.2793	3.19506	4.6527e-08	6.65468e-09
7759	-2.29724	-4.16292	1.45498	1.91242e-05	7.5178e-06
8223	-1.76582	-2.86519	1.46641	8.34989e-06	3.04452e-06
8372	1.31033	-2.51271	3.01368	0.00288812	0.00207754
8564	2.90736	0.873133	1.99078	0.00101227	0.000646216
8572	3.19779	1.63131	1.60974	0.00186836	0.00127452
8573	3.86523	2.50531	1.49226	0.00206353	0.00143302
8601	1.27244	-3.30167	1.48501	0.00619158	0.00482331
8763	0.210259	-3.54561	3.2695	1.32722e-06	3.22752e-07
8804	-0.0771457	1.58667	-1.76045	0.00733057	0.0058183
8815	0.801548	-3.82327	4.61334	2.44508e-07	4.98547e-08
8929	-1.4622	-3.00089	2.01336	1.15769e-09	8.26179e-11
9813	0.810012	-0.691165	1.78046	0.00428658	0.00322104
9817	-2.87038	-5.42306	2.16265	5.6047e-05	2.53262e-05
9853	-1.06034	-3.12297	1.9318	5.04673e-05	2.24265e-05
9918	-0.298193	-2.86088	2.15495	0.00839463	0.00674339
10177	-0.0456917	-3.27587	2.69975	0.00660192	0.00517662
10293	1.25722	-0.950784	3.0854	0.00130709	0.000857939
10584	-0.188176	-3.7383	3.17213	2.39016e-08	2.64459e-09
10609	2.77706	0.740233	1.85595	0.00476923	0.00363662
10767	0.449086	-4.85574	5.42672	2.36035e-10	1.45089e-11
10993	0.893533	-2.20301	2.87703	0.00703652	0.00555959
11045	2.70758	-1.8258	3.39618	0.00839463	0.00674339
11245	3.13533	1.44592	1.62027	3.78749e-05	1.61948e-05
11313	1.22472	-1.09686	2.32158	0.00580673	0.00451305
11437	3.37778	2.12097	1.41155	9.71081e-05	4.69671e-05
11644	-2.29329	-3.96247	1.51122	0.00627782	0.00490555
11683	-2.64136	-4.25396	1.41224	0.00508497	0.00388501
11688	1.70753	-2.39791	3.02427	0.00831277	0.00665022
11741	2.21274	0.584369	1.51267	0.000805476	0.000503332
11742	-2.59659	-4.19375	1.74341	2.90456e-05	1.19753e-05
11824	3.02593	-0.868518	2.75014	0.00206353	0.0014275
11832	3.26002	1.43383	2.26717	0.000140989	7.17414e-05
12395	-0.0431572	-2.65115	1.89154	0.00511055	0.00390608
12412	-0.654706	-2.45213	2.46342	0.00030564	0.000170095
12469	-1.3089	-4.66596	1.95276	5.34054e-05	2.38923e-05
12577	0.842521	-2.1172	1.60694	0.0044441	0.00334606
12622	-0.18524	2.64834	-2.6447	0.000610562	0.00037128
12729	-1.4553	-3.15051	1.71415	0.00130709	0.000857939
12753	-1.73267	-4.27059	2.23571	1.76959e-05	6.91366e-06
12755	-1.47641	-4.31664	2.86981	3.96165e-11	1.67494e-12
12847	-1.39697	-3.51918	2.87648	0.00146386	0.000971368
12856	0.927944	2.80279	-2.02181	1.19497e-08	1.18959e-09
13012	2.84395	0.172753	3.36486	0.000610562	0.00037128
13062	-1.74925	-4.1123	1.84113	4.99644e-05	2.20016e-05
13209	1.96952	-0.106374	2.08725	0.00839463	0.00674339
13220	-1.6755	-3.70643	1.85842	0.000552935	0.000325461
13346	-1.25632	-4.42187	1.99303	0.00229589	0.00160953
13401	0.0791331	2.81942	-1.55939	0.000794521	0.000495534
13402	0.74754	3.03271	-1.96188	0.000468305	0.000274392
13506	1.79762	-0.600559	1.53676	0.000283413	0.00015713
13555	0.295773	3.0178	-2.31577	0.00322415	0.00234923
13558	-1.42501	0.665915	-2.32886	4.5791e-07	9.97093e-08
13740	-0.0795351	1.62556	-1.7051	0.000100707	4.95534e-05
13892	2.26989	3.57894	-1.45829	0.00580673	0.00451305
13935	3.13608	-0.932616	3.8256	0.000610562	0.00037128
14152	0.529302	-2.6842	1.99996	0.00188828	0.00128924
14504	-0.301834	-2.79867	1.47498	0.000610562	0.00037128
14505	-1.40108	-3.10387	1.57577	0.00553896	0.00426675
14965	2.95359	-0.157105	2.93898	4.40853e-06	1.4792e-06
14996	1.80621	3.49861	-2.55159	0.00250307	0.00176678
15006	0.582351	2.55107	-1.81537	0.00627782	0.00490555
15122	-3.20634	-4.85648	1.71121	0.00198865	0.00136134
15415	3.11556	0.815309	2.24894	0.000468305	0.000274945
15742	2.77727	-2.397	3.82833	0.000610562	0.00037128
15853	-2.4547	-3.86214	1.40744	0.00736632	0.00585993
16356	1.68844	3.17621	-1.62316	2.52083e-08	3.35607e-09
16425	-1.81655	-3.82495	2.38145	1.36382e-05	5.17722e-06
16426	-3.85902	-4.39444	1.63928	0.00464542	0.00351854
16456	-0.727931	-3.92082	2.4538	0.000468305	0.000274945
16558	-1.56165	-4.56596	2.93836	0.000462812	0.000268667
16795	1.44523	-1.57482	2.8217	0.000610562	0.00037128
16848	0.557413	2.1334	-1.58384	0.00017081	8.85548e-05
17042	0.0301456	-3.09212	2.55285	0.00102093	0.000656027
17204	3.25296	0.653812	2.75378	0.000100707	4.95534e-05
17361	0.221524	-3.66202	4.00934	2.34912e-06	7.39602e-07
17383	3.39863	-0.549457	1.42728	0.00541111	0.00416177
17454	1.40018	-0.889772	1.8364	3.23059e-05	1.3579e-05
17521	2.36112	-0.0615892	2.33683	0.00206353	0.00143302
17568	2.08996	-0.578823	2.2097	0.00300046	0.00216555
17944	-3.72092	-0.955616	-2.06787	0.00318045	0.00231643
18062	2.26634	0.280442	1.9859	0.00839463	0.00674339
18134	-1.29941	-4.26578	3.08228	2.36035e-10	1.30537e-11
18209	-0.234626	-2.42559	1.91489	0.00559686	0.00431302
18549	2.82555	0.813259	2.2509	0.00826079	0.00660615
18687	1.22816	-0.814696	2.30206	1.76959e-05	6.9298e-06
18822	2.74734	-0.07593	2.97895	0.000111841	5.5166e-05
18990	-0.408254	-2.62669	2.1649	0.000190731	9.93972e-05
19139	-3.95251	-2.31181	-1.50609	9.22527e-05	4.37059e-05
19659	-0.19074	-3.61562	2.82891	4.28886e-05	1.85958e-05
19935	2.64568	1.24104	1.40464	0.000468305	0.000274392
20073	-0.576281	-2.71339	1.81755	0.000398317	0.000228958

## Sheet: 054
dmr_id	median1	median2	median_change	padj	pval
927	-1.15459	-3.32174	1.95015	2.59559e-05	1.14926e-05
1326	3.06728	-2.62276	3.89794	0.00390974	0.00291403
1347	-1.67948	-3.32675	1.53931	0.0011571	0.000769977
1546	3.41434	0.68806	2.42275	0.00127786	0.000857939
1573	-1.04066	-2.79223	1.75157	0.00124031	0.000827812
1604	3.65142	2.59622	1.4111	0.00073624	0.000466563
1827	1.136	-1.8201	2.54296	0.00105845	0.000698634
1838	-1.00887	-3.55874	1.70819	0.00583022	0.00452544
2005	-0.317909	-2.31664	1.70708	0.000857738	0.000553034
2065	2.5076	-3.18278	3.90003	0.000744204	0.000472032
2179	0.866534	-2.34328	2.50671	0.000355284	0.000208339
2706	-0.257493	-3.43788	2.07939	0.000100082	5.20821e-05
2879	2.03506	-0.552462	2.44692	0.0079943	0.00640223
3219	-0.985887	-3.70754	3.04299	0.00651629	0.00511335
3373	1.729	-2.34399	3.52534	0.00728577	0.0058183
3482	-0.242761	-1.90108	1.65832	0.00270145	0.00194382
3576	2.98245	0.742387	1.69789	0.000453425	0.000274392
3597	-0.880005	-3.46142	2.23867	9.99443e-06	4.02608e-06
3700	0.268317	-2.90754	3.21465	0.00581638	0.00451305
3844	1.41496	-0.878229	2.31667	0.000132451	7.17414e-05
4032	-0.491727	-4.08871	3.78785	1.96339e-23	8.34303e-26
4160	0.664337	-4.16166	5.0639	1.08592e-14	2.61483e-16
4178	2.15594	0.320372	1.82517	8.58454e-05	4.32389e-05
4433	1.1371	-0.914303	2.52689	0.0083788	0.00674339
4466	1.56497	-2.57962	4.01296	2.42936e-06	8.55438e-07
4955	0.124733	-4.05264	3.01089	3.14735e-06	1.12609e-06
5123	-1.98863	-3.80386	2.25168	6.96035e-07	1.76868e-07
5379	0.0179258	-2.93242	2.02684	0.00555587	0.00426999
5507	2.80305	-2.2761	3.18143	0.00626725	0.00489307
5601	2.50108	0.0432883	3.78968	0.00541905	0.00416163
5809	3.12455	-0.0569478	4.16932	4.02901e-06	1.4792e-06
6230	-2.53267	-4.49311	1.79142	0.00325093	0.00239353
6286	-0.295738	-2.14727	2.15764	0.000105605	5.5166e-05
6547	1.04656	-0.365481	1.80641	0.00298842	0.00216555
6608	3.1283	0.302423	1.91371	0.00595152	0.00462465
6877	3.3699	1.94189	1.55542	7.39145e-09	8.69731e-10
7031	3.17735	1.13631	1.71114	0.00843108	0.00681174
7056	2.80051	0.160763	2.45327	0.000385786	0.000228958
7091	-0.125333	-2.21691	1.93715	0.00907393	0.00735169
7131	-1.89234	-3.54024	1.41635	0.00114362	0.000757768
7392	2.34055	-2.15361	4.60457	0.000158201	8.68536e-05
7641	-4.0618	-2.35467	-1.78977	9.55343e-05	4.95534e-05
7743	3.51736	-0.926397	2.45481	0.00185626	0.00129097
7763	-1.79557	-3.95898	1.86605	0.000327071	0.000190034
7836	0.68317	-3.27583	3.01743	0.000534972	0.000328532
7854	-0.537895	-3.71621	2.89669	0.00388428	0.00288295
7869	-0.55116	-4.11578	3.14002	0.00541905	0.00416177
7911	3.96353	2.81611	1.44512	2.03439e-05	8.87523e-06
7977	-4.6722	-2.81293	-1.49371	0.000466666	0.000283833
7998	-2.71675	-4.28904	2.00846	0.00396204	0.00296311
8057	-1.58273	-4.16901	2.76993	3.0106e-05	1.35605e-05
8227	2.09247	0.257548	1.46967	0.0014341	0.000971368
8325	2.58188	1.81754	1.9479	0.00722434	0.00576106
8481	2.994	1.58465	1.40248	0.000535339	0.000329848
8620	1.00292	-3.52003	5.9577	2.0969e-09	2.20382e-10
8644	3.73961	2.55755	1.45172	1.39684e-06	3.82252e-07
8651	-1.35507	-4.37908	2.55826	4.00532e-05	1.86764e-05
8690	3.08621	-3.8711	3.09274	0.00728577	0.0058183
8819	0.575195	-3.66571	4.24091	2.20535e-07	4.98547e-08
8907	2.41472	-0.784583	2.06245	0.000487852	0.000297687
8920	-3.07632	-0.755658	-1.79608	0.00843108	0.00681174
8930	0.705174	1.87157	-1.55229	0.00147219	0.000999669
8986	1.52196	-0.284632	1.78851	0.00987279	0.00803248
9285	-1.37077	-3.52938	2.99661	0.00651629	0.00511335
9310	1.68141	0.267908	2.04678	0.00381889	0.00283334
9433	1.638	-1.38101	2.56583	0.000815163	0.000523275
9449	-0.123203	-3.03596	3.92712	2.00141e-08	2.57973e-09
9663	3.24139	-0.357784	3.77983	2.12433e-06	7.39602e-07
9683	-2.96127	-3.40896	1.43905	0.00100486	0.000662413
9815	-1.06941	1.43379	-2.3629	0.00541905	0.00416177
9836	-3.02079	-4.32029	1.63322	0.0011571	0.000769977
10175	-0.433082	-3.42726	3.12012	0.0045493	0.00342551
10580	1.47627	-1.90848	3.69644	0.000453425	0.000274392
10651	0.534963	-3.32364	3.498	0.000131468	7.0054e-05
10764	3.34454	1.89943	1.46241	0.00014359	7.8222e-05
10820	2.18253	0.278288	2.0474	0.000273237	0.00015713
10857	1.92759	-1.45922	2.57336	0.0053138	0.0040704
11053	2.85624	0.054899	1.9845	0.00270145	0.00194382
11597	-2.78354	-3.7764	2.06736	0.000894046	0.000577964
11684	-1.18457	-3.79924	2.91293	2.12433e-06	7.39602e-07
11709	-0.278728	-3.93616	3.74811	4.20629e-23	2.02569e-25
11821	1.8327	-1.02719	1.72795	0.00651629	0.00511335
12034	-0.491003	-3.94358	3.10853	0.00512786	0.00392361
12187	2.4432	0.816617	2.07617	0.0014341	0.000971368
12234	0.584692	-2.50475	2.97802	0.00162313	0.00111458
12383	-0.507524	-3.83873	2.05946	0.00356457	0.00264263
12549	-0.618698	-3.44379	2.28355	0.000857738	0.000553034
12758	-1.39038	2.60226	-3.53947	0.00465186	0.00351854
12843	-0.676943	-2.2525	1.4228	0.00170894	0.0011827
12865	1.63533	-2.72378	3.50947	3.50384e-06	1.2586e-06
13122	1.96089	-0.911728	2.67284	0.00581638	0.00451305
13136	2.46094	-0.850339	1.97335	0.00168452	0.00116007
13331	3.5285	-2.46174	5.904	2.12433e-06	7.39602e-07
13354	0.784302	-3.37211	2.4753	0.00248377	0.00176678
13521	-1.91814	-3.60678	2.37185	0.000273044	0.000156478
13665	-0.536867	-2.57283	1.44553	0.000890075	0.000574136
13816	-1.94803	-4.12552	1.77452	1.57795e-12	6.25816e-14
13937	1.65975	-0.16823	2.3888	7.7795e-07	2.0165e-07
14264	0.674826	-2.56463	2.50342	0.00155616	0.00105978
14458	3.05268	1.60276	1.57352	0.00162313	0.00111458
14651	0.173436	-2.23375	2.27279	6.2552e-06	2.40285e-06
14835	-0.0396765	-3.10945	1.91401	0.000453425	0.000274392
14879	-3.514	-1.34755	-2.00157	0.00178541	0.00123816
15301	3.52823	2.67968	1.98833	0.00905134	0.00733082
16237	1.993	-0.713489	2.06721	0.0025731	0.00184418
16245	1.24016	-0.162977	1.52118	0.00905134	0.00733082
16313	4.08151	1.50714	2.32633	0.00627186	0.00490555
16514	2.45932	1.28887	2.07332	0.0014341	0.000971368
16643	2.60776	-0.213193	2.19911	0.000798907	0.000511256
16675	3.31767	1.75028	1.63325	0.000894046	0.000577964
16711	-0.671096	-3.25347	2.42097	0.000606443	0.000379499
17112	-2.59005	0.0052736	-2.62538	0.00700655	0.00555959
17260	-0.0621981	-2.31033	2.18858	0.000183001	0.000101454
17292	2.3665	-1.33176	2.01108	0.00319568	0.00234908
17775	-0.417147	-3.16252	1.86662	9.73072e-05	5.05281e-05
17971	0.472664	-1.58187	2.35571	0.00467024	0.00353377
18126	2.83209	-0.996823	2.97204	0.000667455	0.000421272
18259	2.14646	0.0653211	1.89392	0.000534972	0.000328998
18306	-1.16852	-4.70862	3.85024	0.000343227	0.000201172
18425	1.06824	-2.11086	3.22071	0.00350674	0.0025928
18632	3.29413	-1.45705	2.56939	9.07258e-05	4.62367e-05
18666	3.12474	1.28658	1.47514	0.00477222	0.00363662
18736	2.5981	0.477657	1.83751	0.000184027	0.000102805
19066	-0.787947	-4.62587	2.70005	1.02037e-05	4.12193e-06
19292	1.05178	0.164063	1.55502	0.00593143	0.00460568
19322	-0.330863	-4.331	3.9348	4.66769e-05	2.21881e-05
19327	0.143844	-2.05808	1.58937	0.0015422	0.00104809
19378	2.74553	-2.62656	3.96949	0.000453425	0.000274392
19594	-4.89206	-4.00308	-1.40044	0.00477222	0.0036321
19672	1.50214	-0.391499	1.99319	0.00700655	0.00555959
19701	1.84792	-1.90323	1.95776	0.000431382	0.000257974
19797	0.164763	-1.05773	2.34685	0.00204139	0.00143302
19907	-0.783986	-4.24184	3.17774	0.00014359	7.8222e-05
20107	3.13526	1.17585	1.67688	0.00178541	0.00123816

## Sheet: 061
dmr_id	median1	median2	median_change	padj	pval
95	-2.2232	-3.82632	1.63318	1.6904e-08	1.89912e-09
121	-0.129318	2.19765	-1.7382	0.00834831	0.00660615
366	-1.51593	-3.54558	1.56112	8.6933e-05	4.1072e-05
397	-1.81298	-3.60827	1.44493	8.10644e-05	3.82114e-05
511	0.2028	2.06977	-1.9266	0.000120995	5.97259e-05
611	2.0183	-2.63184	4.42605	1.55785e-05	6.03693e-06
909	0.491568	2.46668	-1.89989	4.93738e-05	2.21881e-05
1165	-2.19095	-3.92252	1.44701	0.00189051	0.00128924
1471	-1.75419	-3.93645	1.70348	2.75898e-05	1.14926e-05
1490	2.90761	0.0321474	2.35399	0.00258937	0.00182978
1947	-1.58196	-3.4576	1.56133	0.00665172	0.00516614
1979	1.6218	-1.74168	1.75518	0.00119418	0.000769977
2344	0.938608	2.79146	-1.63496	0.00482222	0.00363662
2397	0.250333	-2.14539	2.29014	0.000842038	0.000523275
2689	0.15529	-3.41383	1.9795	0.00356532	0.00259973
3346	1.61054	-2.17106	4.13475	0.000117196	5.73101e-05
3777	-0.771182	-4.30105	3.66725	3.24119e-18	2.8146e-20
3834	2.23377	-0.0970773	2.33527	7.15129e-05	3.32821e-05
3999	0.422903	-4.81242	4.89084	8.37226e-09	8.8153e-10
4114	-0.98539	-4.35289	3.74234	1.54805e-13	4.03292e-15
4123	1.50911	3.16178	-1.5094	7.15129e-05	3.32821e-05
4193	3.44989	2.27947	1.53795	0.0017461	0.0011827
4426	-1.19308	-4.16322	1.87191	0.000198559	0.000104264
4575	0.072165	2.01406	-1.95954	0.000474554	0.000274392
4619	0.695568	3.23387	-2.77115	0.000474554	0.000274392
4812	0.126285	-2.85296	2.55391	0.0039883	0.00296311
5129	2.17454	3.27547	-1.55661	0.00207411	0.00143261
5137	-3.29594	-4.57579	1.48003	0.000265067	0.000143255
5636	1.58328	-0.763397	2.70495	0.000836218	0.000517843
6331	-1.73667	-4.82523	2.04872	3.49929e-07	7.30246e-08
6510	-3.05501	-4.44355	1.60933	0.00146761	0.000971368
6694	0.625204	-2.60011	3.19527	0.00313027	0.00224768
6759	-0.351802	3.06438	-3.06747	0.000117196	5.73101e-05
7148	-2.97615	-4.09112	1.43607	0.00131812	0.000865277
7709	-0.50728	-4.04202	3.03629	1.43308e-06	3.51951e-07
8074	-2.28717	-3.36956	1.44267	0.00088069	0.00054825
8173	-0.924624	-2.67954	2.21885	0.000359166	0.000201172
8776	-2.27805	-4.4234	1.92468	8.37226e-09	8.8153e-10
9501	3.20006	-3.84192	6.7281	1.54805e-13	4.03292e-15
9557	-1.7551	-3.8528	1.86272	0.000258982	0.000139647
9584	-0.281969	-4.09454	4.02202	3.38732e-12	1.24095e-13
9705	-3.01951	-4.27381	1.4893	0.00710864	0.00555959
9779	1.92557	-3.92333	5.32552	2.00154e-11	9.50526e-13
9896	1.35959	-3.56072	3.32282	0.00130965	0.000857939
10067	-3.21996	-4.59122	1.61554	0.00482222	0.00363662
10392	0.886755	-1.5233	2.26591	0.00393983	0.00291403
10465	-1.72707	-5.12587	3.41398	8.36023e-06	2.95841e-06
10542	3.07731	1.78753	1.40748	0.00320182	0.00231643
10699	-2.12217	-3.7995	1.54272	0.000120995	5.97259e-05
10998	-0.0609137	-4.68365	3.74402	1.3397e-07	2.13771e-08
11401	2.4773	0.217699	2.42649	9.65887e-05	4.62367e-05
11517	-2.27634	-3.77949	1.54529	6.63605e-09	6.7531e-10
11773	0.352082	2.15092	-1.68041	0.00850025	0.00681174
11971	0.0638318	1.90773	-1.84278	0.0039883	0.0029666
12586	-1.50207	-4.22394	2.6016	1.28418e-07	2.03168e-08
12645	3.37647	1.21677	2.27937	0.000155214	7.88072e-05
12784	3.81196	-1.29838	4.45154	1.17762e-06	2.81862e-07
12903	3.15882	-1.04662	2.43877	2.56201e-05	1.05887e-05
12905	-3.31834	-4.43804	1.48311	0.00207411	0.00143302
12979	-3.3761	-4.55638	1.40529	0.000141571	7.06894e-05
13011	-2.84272	-4.21842	1.53607	0.00208346	0.00144513
13087	0.845411	-1.73425	2.28389	0.00240049	0.00167676
13181	-1.54918	-3.40445	1.60957	0.00102378	0.000646216
13247	1.3963	-3.61462	2.37487	0.000693959	0.000421272
13410	-1.21879	-4.11556	2.76008	0.00020097	0.000106239
13469	3.04384	1.60511	1.88881	0.00710864	0.00555959
13527	-2.01405	-3.69094	1.57343	0.000571575	0.000337516
13675	-1.52555	-4.31262	2.24389	2.3119e-05	9.486e-06
13736	1.04983	-2.46002	3.61946	4.18954e-13	1.25061e-14
13878	1.42955	2.93858	-2.08352	0.00131812	0.000865277
14115	1.28031	3.12984	-2.24283	0.00850025	0.00681174
14147	-0.654061	-3.15982	2.04843	1.72327e-06	4.2696e-07
14977	4.70008	2.04089	2.37936	0.00320182	0.00231643
15235	-2.82269	-4.17418	2.02856	0.00103563	0.000662413
15255	-0.844224	-3.55183	1.72253	6.70048e-05	3.08022e-05
15269	-0.290487	-2.50275	1.86887	0.000195983	0.000101454
15293	1.41372	2.34434	-1.44856	0.00393983	0.00291403
15393	3.71492	-0.572928	3.44507	0.0017461	0.0011827
15406	1.59875	3.31152	-1.74481	0.00102783	0.000656027
15647	1.05347	-2.14912	3.20259	0.00847524	0.00674339
15726	-2.61342	-4.3565	1.45817	3.41122e-05	1.47002e-05
16300	0.780285	-1.06994	2.21839	0.00584555	0.00451305
16843	-1.37547	-3.31163	1.95753	0.000814571	0.000503332
16949	0.24222	-3.63901	3.21493	0.00264947	0.00187728
16961	-0.427313	-2.77903	1.70941	0.00710864	0.00555959
17206	2.96931	0.985489	2.04849	0.000283735	0.000154765
17227	-0.683431	-4.23023	3.40447	2.44434e-06	7.39602e-07
18147	2.18034	0.161973	1.83499	0.000886041	0.000553034
18301	-0.229384	-2.41716	1.95517	0.00973329	0.00786587
18934	-2.85832	0.0204664	-2.49702	0.00482222	0.00363662
19314	-3.49282	-4.91	1.45067	1.55134e-06	3.82256e-07
19457	1.46754	2.91556	-1.82767	2.954e-06	9.05037e-07
19492	-0.536784	-3.30194	2.22525	0.00929341	0.00748517
19903	-0.79774	-3.51821	2.22364	4.76755e-05	2.10109e-05
19911	-1.20381	-3.26159	2.12745	1.84651e-06	4.59497e-07
19917	-0.724984	-3.24257	1.82115	0.00102378	0.000646216
19955	0.28054	2.33423	-1.69913	0.00710864	0.00555959
20038	1.66565	-4.79803	6.17654	1.54805e-13	4.03292e-15
20048	-0.214706	-3.72425	3.54071	9.10569e-12	3.57455e-13
20071	-0.399616	-4.00198	3.58039	0.000142056	7.17414e-05
