# Supplementary material for: Global hypo-methylation in a proportion of glioblastoma enriched for an astrocytic signature is associated with increased invasion and altered immune landscape
Source: eLife journal article supplement (doi:10.7554/elife.77335), 2022-11-02
Supplement: fig1-data1 [file Figure_1_B_E_G.xlsx]

## Sheet: Figure 1
	Figure 1B	% Hypo-methylated DMRs in GICs relative to syngeneic iNSCs
		Bias	Non-Bias
		81.8779	53.0639
		88.0718	47.1009
		82.4831	42.3604
		62.5059	37.9856
			30.6685
			47.9473
	Figure 1E	% Hypo-methylated DMRs in GICs when compared to all iNSCs
			iNSC Line
		GIC Line	iNSC17	iNSC18	iNSC19	iNSC26	iNSC30	iNSC31	iNSC50	iNSC52	iNSC54	iNSC61
		GIC17	62.5059	60.263	58.7294	48.1985	71.1871	69.0496	59.36	54.2782	61.9532	62.1835
		GIC18	58.5692	53.0639	54.792	44.6474	66.8331	64.8412	56.2897	51.3292	59.0551	58.2827
		GIC19	85.1314	83.3936	81.8779	78.2038	87.6607	86.6084	84.0278	81.0662	84.1817	85.2351
		GIC26	65.5977	61.1921	58.4452	47.1009	71.3829	68.4676	62.0887	55.5055	62.542	64.5718
		GIC30	84.8664	83.6214	81.9638	77.8868	88.0718	87.0958	84.142	80.8429	84.2275	85.6983
		GIC31	79.1516	75.8429	75.4367	70	83.3526	82.4831	78.6598	74.3842	78.7451	80.4514
		GIC50	46.8095	42.0314	44.5848	34.2366	56.8328	55.3291	42.3604	39.1938	46.5338	45.1713
		GIC52	45.9219	41.5627	41.7006	32	55.2621	52.8771	42.9357	37.9856	46.223	45.8779
		GIC54	32.9006	28.1901	28.3951	19.7329	40.675	38.4332	27.1359	24.2973	30.6685	30.0479
		GIC61	50.0701	44.5853	46.6346	36.0242	60.0392	57.1781	45.3476	41.537	49.0063	47.9473
	Figure 1G	Proportion of hypo-methylated DMRs in HGCC GICs when compared to 5 iNSC lines from this study
		iNSC19	iNSC31	iNSC50	iNSC52
		0.608347	0.704121	0.581633	0.550258
		0.652095	0.723278	0.62541	0.606481
		0.617089	0.686693	0.58523	0.549918
		0.508211	0.58747	0.480823	0.452632
		0.218579	0.283863	0.186441	0.163507
		0.384045	0.474678	0.368345	0.339623
		0.700107	0.776582	0.678109	0.652442
		0.546075	0.643969	0.474425	0.474282
		0.51478	0.611091	0.451477	0.452037
		0.788411	0.844773	0.77152	0.75759
		0.710953	0.760272	0.679916	0.669703
		0.5882	0.687156	0.558998	0.525641
		0.275622	0.355197	0.229885	0.204162
		0.695052	0.765234	0.67915	0.656782
		0.241535	0.327801	0.207668	0.19793
		0.674805	0.730494	0.648785	0.630534
		0.921053	0.939856	0.917895	0.909059
		0.471264	0.551481	0.445594	0.432233
		0.7566	0.796054	0.738119	0.719934
		0.492737	0.58884	0.462668	0.421673
		0.27146	0.344013	0.234199	0.213079
		0.865613	0.890091	0.852512	0.839823
		0.264211	0.369212	0.236297	0.210225
		0.47364	0.579305	0.437173	0.419742
		0.639655	0.722504	0.616943	0.602198
		0.853908	0.881132	0.844994	0.833755
		0.77157	0.82482	0.751916	0.740223
		0.51634	0.615593	0.444073	0.438238
		0.336476	0.412958	0.296569	0.264196
		0.302767	0.395593	0.250144	0.236828
		0.343861	0.433918	0.295418	0.28
		0.469045	0.576117	0.424342	0.398063
		0.590476	0.681108	0.556438	0.536344
		0.587589	0.667578	0.561753	0.545993
		0.490244	0.588979	0.443022	0.429624
		0.471861	0.578581	0.434783	0.40583
		0.662842	0.735505	0.625869	0.613327
		0.720297	0.796992	0.6878	0.664013
		0.483636	0.579332	0.433062	0.42173
		0.909548	0.932532	0.901575	0.897731
		0.781292	0.832735	0.75911	0.737842
		0.844601	0.88762	0.83499	0.813803
		0.813393	0.864046	0.801248	0.77919
		0.170279	0.236041	0.136842	0.120219
		0.346624	0.435455	0.284447	0.26888
		0.746594	0.81066	0.722304	0.70727
		0.438084	0.539666	0.381366	0.362874
		0.661119	0.740115	0.639344	0.619431
		0.626906	0.720088	0.590202	0.55595
		0.806269	0.859539	0.789959	0.777932
		0.725118	0.790038	0.700562	0.67992
		0.736497	0.782427	0.715827	0.696443
		0.46802	0.582312	0.419073	0.390536
		0.666408	0.731019	0.640265	0.619362
		0.264132	0.321232	0.212101	0.209877
		0.61936	0.687034	0.586494	0.569643
		0.231098	0.322466	0.179861	0.163082
		0.426942	0.532877	0.385488	0.364515
		0.398327	0.510124	0.335417	0.323118
		0.427868	0.531673	0.380042	0.362582
		0.273707	0.384428	0.214366	0.207827
		0.352715	0.474505	0.319108	0.291294
		0.345908	0.465789	0.297576	0.278584
		0.906093	0.924759	0.897536	0.890825
		0.456869	0.546145	0.433875	0.410569
		0.531801	0.638259	0.505922	0.471239
		0.466292	0.573028	0.431912	0.398321
		0.368651	0.47567	0.336746	0.305908
		0.370958	0.457864	0.30443	0.290149
		0.496015	0.579725	0.475019	0.457741
		0.59228	0.665893	0.577367	0.545035
