# Supplementary material for: Global hypo-methylation in a proportion of glioblastoma enriched for an astrocytic signature is associated with increased invasion and altered immune landscape
Source: eLife journal article supplement (doi:10.7554/elife.77335), 2022-11-02
Supplement: fig1-figsupp1-data1 [file Figure_1_figure_supplement_1_E.xlsx]

## Sheet: Figure S1
	Figure 1-figure supplement 1 E	Number and direction of DE miRNAs from syngeneic GIC-iNSC comparisons used to make venn diagrams
			GIC Number
		Gene Direction	61	52	54	50	44	31	30	19	18
		Up-regulated	48	51	88	65	87	84	45	73	49
		Down-regulated	129	165	79	65	77	135	46	98	94
	Note: See separate file for Figure 1-figure supplement 1 E DE miRNA lists
