# Supplementary material for: Global hypo-methylation in a proportion of glioblastoma enriched for an astrocytic signature is associated with increased invasion and altered immune landscape
Source: eLife journal article supplement (doi:10.7554/elife.77335), 2022-11-02
Supplement: fig1-figsupp1-data1 [file Figure_1_figure_supplement_1_E_DE_miRNAs.xlsx]

## Sheet: iNSC50 - GIC50_smRNA_DEList_glm
	logFC	unshrunk.logFC	logCPM	PValue	FDR
MIMAT0000724	13.2589	13.3643	7.80203	2.61e-15	7.35e-12		65	Up-regulated
MIMAT0000063	-10.3703	-10.3706	14.654	1.02e-13	1.44e-10		65	Down-regulated
MIMAT0022721	11.9067	12.0102	7.47286	2.05e-13	1.93e-10
MIMAT0005899	11.2151	11.2798	6.86029	1.18e-12	8.3e-10
MIMAT0002875	10.1854	10.195	9.20486	3.88e-12	2.19e-09
MIMAT0003250	11.0748	11.2293	6.09125	6.51e-12	3.05e-09
MIMAT0000275_1	8.87536	8.87859	9.56943	1.88e-10	7.54e-08
MIMAT0000266	11.8012	1.44269e+08	5.55946	3.17e-10	1.12e-07
MIMAT0000275	8.46618	8.46849	9.63644	6.69e-10	1.95e-07
MIMAT0004482	-8.96514	-9.01877	6.58034	6.92e-10	1.95e-07
MIMAT0003328	8.98327	9.08571	3.71898	1.47e-09	3.76e-07
MIMAT0025470	10.9468	1.44269e+08	3.30986	2.65e-09	6.21e-07
MIMAT0004948	-8.67234	-8.90084	2.18011	3.15e-09	6.4e-07
MIMAT0004566	10.8204	1.44269e+08	2.42379	3.18e-09	6.4e-07
MIMAT0004508	8.28642	8.30231	6.4428	3.93e-09	7.37e-07
MIMAT0002805	10.488	1.44269e+08	1.0402	5.57e-09	9.79e-07
MIMAT0026625	10.1012	1.44269e+08	1.04076	2e-08	3.31e-06
MIMAT0026741	9.82579	1.44269e+08	1.32552	5.56e-08	8.27e-06
MIMAT0000726	9.89189	1.44269e+08	1.98975	5.58e-08	8.27e-06
MIMAT0000461	-7.29209	-7.30119	6.82573	6.35e-08	8.94e-06
MIMAT0000442	-6.90931	-6.90974	10.6664	7.16e-08	9.6e-06
MIMAT0000442_1	-6.87355	-6.87397	10.6615	8.06e-08	9.61e-06
MIMAT0004947	-7.08989	-7.12694	2.61086	8.07e-08	9.61e-06
MIMAT0000442_2	-6.86812	-6.86855	10.6618	8.2e-08	9.61e-06
MIMAT0018934	-9.0628	-144269486	2.41421	1.2e-07	1.31e-05
MIMAT0002173	6.80373	6.80506	10.0913	1.21e-07	1.31e-05
MIMAT0000102	7.68556	7.83933	3.62593	1.5e-07	1.57e-05
MIMAT0005918	9.42762	1.44269e+08	1.05416	1.79e-07	1.79e-05
MIMAT0019939	-8.63222	-1.44269e+08	0.3589	2.91e-07	2.82e-05
MIMAT0000098	-6.03808	-6.03809	15.8211	3.36e-07	3.15e-05
MIMAT0015015	-8.56805	-1.44269e+08	0.302914	3.62e-07	3.29e-05
MIMAT0025455	-8.47612	-1.44269e+08	1.04095	5.44e-07	4.79e-05
MIMAT0000062	-6.01476	-6.01477	14.0655	5.75e-07	4.9e-05
MIMAT0000062_1	-5.99385	-5.99387	14.0747	6.16e-07	5.09e-05
MIMAT0000062_2	-5.98323	-5.98325	14.0699	6.39e-07	5.14e-05
MIMAT0025849	9.0162	144269486	1.07554	6.6e-07	5.16e-05
MIMAT0005903	6.86644	6.96998	2.5598	7.45e-07	5.66e-05
MIMAT0019219	-8.51734	-1.44269e+08	-0.32705	7.67e-07	5.68e-05
MIMAT0009206	-6.23846	-6.24768	3.17848	8.86e-07	6.39e-05
MIMAT0000415	-5.56145	-5.56146	15.6149	1.89e-06	0.000130341
MIMAT0022717	6.69467	6.79897	3.92339	1.9e-06	0.000130341
MIMAT0004761	6.07949	6.08372	7.65267	2.13e-06	0.000142878
MIMAT0002883_2	8.71233	1.44269e+08	4.28921	3.01e-06	0.000195679
MIMAT0001412	7.02547	7.31623	2.6983	3.06e-06	0.000195679
MIMAT0000086	-5.71788	-5.71846	10.2809	3.59e-06	0.000224649
MIMAT0019928	-8.2732	-1.44269e+08	-0.784106	3.81e-06	0.000233204
MIMAT0000454	5.77672	5.77879	7.28794	5.39e-06	0.000322548
MIMAT0000414	-5.28545	-5.28546	14.7336	5.89e-06	0.000339356
MIMAT0005459	-8.51236	-1.44269e+08	-1.17922	6.08e-06	0.000339356
MIMAT0003385	5.73813	5.74016	7.25593	6.08e-06	0.000339356
MIMAT0010195	-6.30311	-6.52998	2.22656	6.24e-06	0.000339356
MIMAT0003882	5.96277	5.99861	4.18454	6.28e-06	0.000339356
MIMAT0018204	5.82022	5.85491	2.98774	6.39e-06	0.000339356
MIMAT0004484	-5.58559	-5.58599	9.23636	6.58e-06	0.000342984
MIMAT0004615	-5.67962	-5.68202	7.25708	7.15e-06	0.000365693
MIMAT0001413	5.40321	5.4036	9.9752	1.02e-05	0.000511906
MIMAT0005941	6.52617	6.81602	1.22099	1.05e-05	0.000516468
MIMAT0000102_1	5.7093	5.74474	3.61078	1.1e-05	0.000532393
MIMAT0000441_2	-5.07157	-5.07158	15.0864	1.13e-05	0.000538409
MIMAT0000441_1	-5.05331	-5.05331	15.0862	1.2e-05	0.000557733
MIMAT0000441	-5.05115	-5.05115	15.0871	1.21e-05	0.000557733
MIMAT0002881	6.58951	6.87807	3.65004	1.35e-05	0.000614252
MIMAT0005887	-5.36072	-5.39097	1.68716	1.44e-05	0.000640987
MIMAT0000103	5.29012	5.29093	8.67053	1.81e-05	0.000781142
MIMAT0004752	5.44985	5.46056	4.30814	1.82e-05	0.000781142
MIMAT0000707	5.04374	5.04376	12.999	1.83e-05	0.000781142
MIMAT0002820	-5.66066	-5.72823	4.54419	1.86e-05	0.000781142
MIMAT0000067_1	-4.92628	-4.92628	14.4069	2.08e-05	0.000861338
MIMAT0000065	-5.1084	-5.10848	10.8174	2.19e-05	0.000882485
MIMAT0000067	-4.91107	-4.91107	14.3207	2.22e-05	0.000882485
MIMAT0014980_3	-8.12413	-1.44269e+08	-1.30457	2.23e-05	0.000882485
MIMAT0017999	-7.40162	-1.44269e+08	-0.455806	2.38e-05	0.000924073
MIMAT0019928_1	-6.4369	-6.86055	-0.680274	2.4e-05	0.000924073
MIMAT0014980_2	-8.09425	-144269485	-1.35117	2.73e-05	0.00103911
MIMAT0015001	-5.30948	-5.40324	1.01488	3.15e-05	0.00117971
MIMAT0026618	7.84	1.44269e+08	-0.444047	3.42e-05	0.00126477
MIMAT0015014	-7.89409	-1.44269e+08	-1.28251	3.57e-05	0.00130354
MIMAT0004751	5.17545	5.18059	5.25418	3.69e-05	0.00133175
MIMAT0004925	7.64251	1.44269e+08	1.24976	3.89e-05	0.00138438
MIMAT0005893	7.62495	1.44269e+08	0.00893407	3.94e-05	0.00138438
MIMAT0002881_2	5.72979	5.87929	3.63274	5.18e-05	0.0018
MIMAT0019059	5.6745	5.82502	-0.41968	6.07e-05	0.00206186
MIMAT0004503	-6.8833	-1.44269e+08	0.701634	6.08e-05	0.00206186
MIMAT0026612	5.47716	5.62813	0.24049	6.34e-05	0.00212173
MIMAT0019912	-7.53379	-1.44269e+08	-1.19755	6.53e-05	0.00216135
MIMAT0004778	7.44685	1.44269e+08	1.81551	7.07e-05	0.00231279
MIMAT0026608	-5.36358	-5.58754	0.352938	7.6e-05	0.00245647
MIMAT0000430_1	-4.84689	-4.87637	3.22678	9.02e-05	0.00286018
MIMAT0000096	-4.68019	-4.68029	10.0701	9.05e-05	0.00286018
MIMAT0018351	-7.65121	-1.44269e+08	-1.45109	9.51e-05	0.00297241
MIMAT0014980_1	-7.73789	-1.44269e+08	-1.52	9.68e-05	0.00299101
MIMAT0019738	7.30813	1.44269e+08	1.69549	0.0001	0.00305739
MIMAT0004779	7.30558	1.44269e+08	2.16258	0.000104103	0.00312544
MIMAT0027586	-4.66853	-4.70741	0.201602	0.000105218	0.00312544
MIMAT0014980	-7.81342	-1.44269e+08	-1.59594	0.000105557	0.00312544
MIMAT0003214	7.24239	1.44269e+08	0.158357	0.000106663	0.00312544
MIMAT0019951	4.79615	4.81918	3.13872	0.00010967	0.00318044
MIMAT0000226	-4.71719	-4.71761	7.65884	0.0001116	0.00320336
MIMAT0000728	4.79875	4.80643	6.09143	0.000114806	0.00326211
MIMAT0002813	4.52923	4.52928	10.3814	0.000136104	0.00382859
MIMAT0000725	8.06652	144269485	-1.46951	0.000142913	0.00398035
MIMAT0002881_1	5.04085	5.11718	3.6479	0.000154687	0.00423916
MIMAT0004517	4.85035	4.90264	2.77805	0.00015522	0.00423916
MIMAT0004779_1	7.07812	144269484	2.18322	0.000184439	0.00498873
MIMAT0003340	-5.61612	-6.03578	-0.558004	0.000188369	0.0050465
MIMAT0024614	-5.87908	-6.29993	-1.02698	0.00020105	0.00527291
MIMAT0001620	-4.63112	-4.69802	1.35074	0.000202312	0.00527291
MIMAT0000428	4.56351	4.56666	6.22738	0.000202444	0.00527291
MIMAT0000064	-4.25468	-4.25469	12.8595	0.000213287	0.00550437
MIMAT0002883_1	5.05759	5.15981	4.32937	0.000228049	0.00583184
MIMAT0005924	4.52725	4.537	3.95279	0.000230911	0.00585182
MIMAT0000681	-4.69965	-4.79218	1.91522	0.000244842	0.00611095
MIMAT0002821	-4.41492	-4.41583	8.38754	0.000245481	0.00611095
MIMAT0000226_1	-4.45549	-4.45596	7.20694	0.000247806	0.00611471
MIMAT0022283	-4.36083	-4.39982	0.370899	0.000251538	0.00615283
MIMAT0007888	-4.32505	-4.34654	1.17885	0.000254933	0.00618213
MIMAT0000428_1	4.45241	4.45524	6.24097	0.000274512	0.00660002
MIMAT0000646	-4.2178	-4.21784	11.5963	0.000284512	0.00678247
MIMAT0027622	-7.42582	-1.44269e+08	-1.68924	0.000298197	0.00704897
MIMAT0004928	-4.27429	-4.2939	1.50326	0.000315278	0.00733261
MIMAT0003242	4.37877	4.39306	3.12663	0.000315409	0.00733261
MIMAT0019747	4.37805	4.38547	4.17782	0.000353477	0.00811055
MIMAT0003161	4.28933	4.28958	8.21367	0.000354638	0.00811055
MIMAT0027684	-4.12083	-4.1431	0.420693	0.000390433	0.00880854
MIMAT0027587	-4.30597	-4.30837	4.31358	0.000391421	0.00880854
MIMAT0002878	4.50319	4.53372	4.91529	0.000404445	0.00902939
MIMAT0015012	4.39207	4.43554	1.44324	0.000416408	0.00922327
MIMAT0000318	-4.28072	-4.28212	6.44889	0.000423243	0.00930142
MIMAT0002880	4.51659	4.55375	4.74801	0.000440526	0.0096062
MIMAT0005789	6.68636	1.44269e+08	1.71479	0.000461189	0.00997943

## Sheet: iNSC52 - GIC52_smRNA_DEList_glm
	logFC	unshrunk.logFC	logCPM	PValue	FDR
MIMAT0022721	16.7217	1.44269e+08	7.47286	3.12e-17	8.78e-14		51	Up-regulated
MIMAT0000281	16.1327	1.44269e+08	9.0257	7.78e-17	1.09e-13		165	Down-regulated
MIMAT0005899	16.3065	1.44269e+08	6.86029	1.54e-16	1.44e-13
MIMAT0026557	14.1461	1.44269e+08	5.31822	1.33e-13	9.33e-11
MIMAT0003180	13.7934	1.44269e+08	6.51333	3.54e-13	1.99e-10
MIMAT0000755	10.7005	10.7222	9.97634	6.4e-13	2.47e-10
MIMAT0015050	12.0117	12.3435	7.99025	6.6e-13	2.47e-10
MIMAT0002814	10.8539	10.8873	9.20677	7.01e-13	2.47e-10
MIMAT0000275_1	10.4285	10.4377	9.56943	1.43e-12	4.22e-10
MIMAT0001639	9.94778	9.95085	12.5184	1.5e-12	4.22e-10
MIMAT0001627	10.5643	10.5923	9.0828	1.7e-12	4.35e-10
MIMAT0000722	9.78701	9.78898	12.5668	2.46e-12	5.77e-10
MIMAT0003250	11.6033	11.9342	6.09125	3.89e-12	8.43e-10
MIMAT0004954	9.91752	9.92476	10.4693	4.8e-12	9.43e-10
MIMAT0000736	10.6941	10.8685	10.1737	5.03e-12	9.43e-10
MIMAT0004761	12.7157	1.44269e+08	7.65267	6.97e-12	1.22e-09
MIMAT0003330	10.1489	10.177	8.6834	7.54e-12	1.23e-09
MIMAT0000063	-9.14658	-9.14665	14.654	7.89e-12	1.23e-09
MIMAT0004921	10.3967	10.4686	7.69369	1.06e-11	1.56e-09
MIMAT0002173	9.91677	9.95759	10.0913	1.11e-11	1.56e-09
MIMAT0000275	9.72377	9.72924	9.63644	1.24e-11	1.66e-09
MIMAT0001625	12.5581	1.44269e+08	5.48344	1.69e-11	2.16e-09
MIMAT0002817	9.8862	9.91697	8.63634	1.84e-11	2.25e-09
MIMAT0004690	12.504	1.44269e+08	5.97501	1.93e-11	2.26e-09
MIMAT0004814	9.69445	9.71714	9.00944	2.53e-11	2.85e-09
MIMAT0002175	9.94854	10.0204	8.37033	3.34e-11	3.61e-09
MIMAT0003882	12.2613	1.44269e+08	4.18454	3.83e-11	3.99e-09
MIMAT0001635	10.4237	10.5988	5.99715	4.49e-11	4.51e-09
MIMAT0002816	9.82277	9.91218	8.64537	5.73e-11	5.4e-09
MIMAT0005924	12.0798	144269489	3.95279	5.86e-11	5.4e-09
MIMAT0004920	12.1568	1.44269e+08	4.76357	5.95e-11	5.4e-09
MIMAT0000447	9.2052	9.2135	9.75977	6.71e-11	5.9e-09
MIMAT0002813	9.11802	9.12696	10.3814	7.08e-11	6.03e-09
MIMAT0000737	9.14653	9.15334	9.89989	7.42e-11	6.14e-09
MIMAT0000446	8.62363	8.6253	12.9069	1.12e-10	8.99e-09
MIMAT0000102_1	11.7386	1.44269e+08	3.61078	1.37e-10	1.07e-08
MIMAT0000102	11.6847	1.44269e+08	3.62593	1.64e-10	1.25e-08
MIMAT0000721	9.65388	9.74365	6.92775	1.76e-10	1.3e-08
MIMAT0019939	-10.719	-1.44269e+08	0.3589	2.17e-10	1.56e-08
MIMAT0004813	9.41817	9.49056	7.48353	2.39e-10	1.68e-08
MIMAT0001638	9.51491	9.63316	7.72252	2.98e-10	2.05e-08
MIMAT0002171	11.6068	1.44269e+08	5.34527	3.1e-10	2.08e-08
MIMAT0022697	8.84169	8.86791	8.10918	5.52e-10	3.61e-08
MIMAT0003879	11.3502	1.44269e+08	6.41528	6.26e-10	4e-08
MIMAT0000733	8.28316	8.28569	11.2592	6.84e-10	4.28e-08
MIMAT0003329	8.55318	8.57489	9.14571	8.94e-10	5.47e-08
MIMAT0026483	11.2215	1.44269e+08	4.67104	1.03e-09	6.17e-08
MIMAT0002176	8.69977	8.73288	7.6951	1.12e-09	6.54e-08
MIMAT0000461	-8.5299	-8.541	6.82573	1.46e-09	8.36e-08
MIMAT0004566	10.8397	1.44269e+08	2.42379	1.55e-09	8.71e-08
MIMAT0004757	9.23092	9.40521	6.38552	1.7e-09	9.39e-08
MIMAT0026559	9.612	9.94262	4.97896	1.8e-09	9.76e-08
MIMAT0000754	9.57324	9.90385	5.4264	2.01e-09	1.07e-07
MIMAT0003161	8.46586	8.5019	8.21367	2.1e-09	1.09e-07
MIMAT0001629_1	9.14338	9.31891	6.19163	2.24e-09	1.15e-07
MIMAT0026614	10.7343	1.44269e+08	3.25544	2.63e-09	1.32e-07
MIMAT0002875	7.8898	7.89141	9.20486	4.77e-09	2.35e-07
MIMAT0002178	10.6255	1.44269e+08	3.99299	5.32e-09	2.58e-07
MIMAT0005918	10.267	1.44269e+08	1.05416	5.92e-09	2.82e-07
MIMAT0001621	8.37831	8.43844	6.14286	6.1e-09	2.86e-07
MIMAT0001629	8.61713	8.73619	6.19296	6.28e-09	2.9e-07
MIMAT0004696	8.70742	8.88162	4.38832	8.73e-09	3.96e-07
MIMAT0003163	10.4522	1.44269e+08	4.02162	9.14e-09	4.08e-07
MIMAT0018934	-9.81727	-1.44269e+08	2.41421	9.56e-09	4.2e-07
MIMAT0003332	10.474	1.44269e+08	4.90028	9.77e-09	4.23e-07
MIMAT0000729_1	10.3949	1.44269e+08	3.8674	1.02e-08	4.35e-07
MIMAT0000729	10.3239	1.44269e+08	3.86665	1.27e-08	5.32e-07
MIMAT0002170	9.97401	1.44269e+08	1.54457	1.95e-08	8.05e-07
MIMAT0005923	7.79389	7.81836	5.60051	2.02e-08	8.23e-07
MIMAT0000435	7.14242	7.14304	11.8799	2.37e-08	9.53e-07
MIMAT0000437	8.72331	9.05361	5.605	2.63e-08	1.04e-06
MIMAT0026558	8.58004	8.91031	3.55004	2.83e-08	1.1e-06
MIMAT0026555	9.96009	1.44269e+08	3.16746	2.85e-08	1.1e-06
MIMAT0000266	10.0521	144269487	5.55946	3.34e-08	1.27e-06
MIMAT0026555_1	9.8526	1.44269e+08	3.19482	4.03e-08	1.51e-06
MIMAT0000734	9.85005	1.44269e+08	4.59726	6.37e-08	2.36e-06
MIMAT0025455	-9.05862	-144269486	1.04095	7.16e-08	2.61e-06
MIMAT0004606	9.77831	1.44269e+08	5.80551	7.41e-08	2.67e-06
MIMAT0004482	-7.17748	-7.19031	6.58034	9.48e-08	3.37e-06
MIMAT0019951	9.52759	1.44269e+08	3.13872	1.08e-07	3.79e-06
MIMAT0026741	7.93799	8.26856	1.32552	1.09e-07	3.79e-06
MIMAT0022838	9.60676	1.44269e+08	5.30708	1.26e-07	4.34e-06
MIMAT0000687	9.56979	1.44269e+08	4.32518	1.43e-07	4.84e-06
MIMAT0003242	6.98064	7.02092	3.12663	1.68e-07	5.61e-06
MIMAT0000448	7.66939	7.84439	5.26839	2.03e-07	6.71e-06
MIMAT0007884	-6.68117	-6.69004	3.17225	2.13e-07	6.96e-06
MIMAT0004604	9.42076	1.44269e+08	5.22902	2.19e-07	7.09e-06
MIMAT0003881	7.88546	8.21603	3.4119	2.28e-07	7.29e-06
MIMAT0004565	7.75259	8.08301	1.88947	2.46e-07	7.77e-06
MIMAT0004615	-6.757	-6.76045	7.25708	2.76e-07	8.64e-06
MIMAT0004601	6.80066	6.81869	5.92768	3.69e-07	1.14e-05
MIMAT0019930	9.06664	144269486	1.88966	3.81e-07	1.16e-05
MIMAT0018204	6.83772	6.90908	2.98774	4.41e-07	1.33e-05
MIMAT0001412	7.56453	7.89477	2.6983	5.17e-07	1.55e-05
MIMAT0026612	8.84079	1.44269e+08	0.24049	5.43e-07	1.61e-05
MIMAT0004508	6.52604	6.53041	6.4428	6.33e-07	1.86e-05
MIMAT0001636	8.80815	1.44269e+08	1.49989	7.63e-07	2.21e-05
MIMAT0004919	8.84796	1.44269e+08	2.37474	7.92e-07	2.27e-05
MIMAT0004284	6.77819	6.85089	5.86944	9.32e-07	2.61e-05
MIMAT0002820	-6.63473	-6.69807	4.54419	9.35e-07	2.61e-05
MIMAT0000416_1	6.48527	6.50382	6.64774	9.38e-07	2.61e-05
MIMAT0022270	6.79227	6.96599	1.22352	1.16e-06	3.2e-05
MIMAT0000416	6.18679	6.20165	6.73252	2.14e-06	5.83e-05
MIMAT0000254	-5.55373	-5.55377	15.1549	2.15e-06	5.83e-05
MIMAT0022713	8.54056	1.44269e+08	3.51571	2.32e-06	6.22e-05
MIMAT0000442_1	-5.78156	-5.78175	10.6615	2.7e-06	7.18e-05
MIMAT0000442	-5.75366	-5.75384	10.6664	2.95e-06	7.76e-05
MIMAT0000442_2	-5.75094	-5.75113	10.6618	2.98e-06	7.76e-05
MIMAT0004689	8.44914	1.44269e+08	3.60114	3.08e-06	7.95e-05
MIMAT0022705	8.46713	1.44269e+08	4.4795	3.46e-06	8.84e-05
MIMAT0002890	8.4169	1.44269e+08	4.64557	3.95e-06	0.000100185
MIMAT0004599	6.56711	6.74001	3.47245	4.02e-06	0.0001009
MIMAT0000735	8.2651	1.44269e+08	1.78446	4.15e-06	0.000103348
MIMAT0026607	8.18856	1.44269e+08	1.87206	5.26e-06	0.000129731
MIMAT0000263	5.73683	5.75383	9.05104	6.01e-06	0.000147089
MIMAT0005955	8.14701	1.44269e+08	3.27908	6.73e-06	0.000163249
MIMAT0004517	6.11817	6.23585	2.77805	7.44e-06	0.000178776
MIMAT0004902	-5.58633	-5.59459	3.69481	8.44e-06	0.000201286
MIMAT0000724	5.71673	5.74962	7.80203	1.04e-05	0.00024469
MIMAT0000098	-5.04419	-5.04419	15.8211	1.07e-05	0.000251587
MIMAT0009206	-5.45257	-5.4679	3.17848	1.13e-05	0.000262897
MIMAT0000062_1	-5.11049	-5.1105	14.0747	1.21e-05	0.000278031
MIMAT0000062	-5.09472	-5.09473	14.0655	1.27e-05	0.000291037
MIMAT0000062_2	-5.09064	-5.09065	14.0699	1.29e-05	0.000292361
MIMAT0000452	7.86625	1.44269e+08	2.38126	1.38e-05	0.000310609
MIMAT0004556	-5.45479	-5.46081	5.93573	1.58e-05	0.000351897
MIMAT0026481	7.71424	1.44269e+08	0.326335	1.65e-05	0.000364671
MIMAT0017989	5.69556	5.78443	2.27699	1.75e-05	0.00038515
MIMAT0000231_1	5.34411	5.3546	8.17508	2.01e-05	0.000438663
MIMAT0000720	5.90407	6.0215	4.32524	2.09e-05	0.000451878
MIMAT0005893	7.62806	1.44269e+08	0.00893407	2.24e-05	0.000480244
MIMAT0022283	-5.19864	-5.25347	0.370899	2.3e-05	0.000490659
MIMAT0002818	5.85121	6.02406	2.04367	2.67e-05	0.000565279
MIMAT0002878	5.38841	5.42103	4.91529	3.19e-05	0.000669299
MIMAT0004804	-5.30172	-5.38108	1.6292	3.23e-05	0.000672937
MIMAT0005903	5.12458	5.14567	2.5598	3.5e-05	0.000724837
MIMAT0000086	-4.97599	-4.97646	10.2809	3.6e-05	0.000740023
MIMAT0004948	-5.06413	-5.09299	2.18011	3.92e-05	0.000796304
MIMAT0000231	5.10785	5.11672	8.17581	3.93e-05	0.000796304
MIMAT0019219	-6.05004	-6.48263	-0.32705	4.05e-05	0.000812979
MIMAT0003385	5.0415	5.04247	7.25593	4.65e-05	0.000926741
MIMAT0017999	-7.09316	-144269484	-0.455806	4.82e-05	0.000955367
MIMAT0001630	7.31502	1.44269e+08	0.60829	4.92e-05	0.000967132
MIMAT0005800	7.43129	1.44269e+08	-0.32394	5.19e-05	0.00101446
MIMAT0003331	7.39078	1.44269e+08	3.42335	5.41e-05	0.00104911
MIMAT0002881	5.26713	5.32637	3.65004	5.47e-05	0.0010536
MIMAT0002881_1	5.23133	5.29031	3.6479	6.06e-05	0.00116056
MIMAT0026618	7.41622	1.44269e+08	-0.444047	6.16e-05	0.00116992
MIMAT0003328	5.14341	5.18826	3.71898	6.43e-05	0.00121477
MIMAT0004605	5.55363	5.72481	2.19942	6.52e-05	0.00122327
MIMAT0000226	-4.90321	-4.90568	7.65884	6.7e-05	0.00124816
MIMAT0004952	7.18062	1.44269e+08	1.41559	8.05e-05	0.00149043
MIMAT0000707	4.56212	4.56213	12.999	8.49e-05	0.00156022
MIMAT0019770	5.1515	5.26688	0.745694	8.84e-05	0.00161556
MIMAT0019772	7.09922	144269484	0.202183	9.2e-05	0.00166885
MIMAT0004752	4.79363	4.79972	4.30814	0.000107354	0.00193582
MIMAT0004947	-4.69471	-4.71324	2.61086	0.00011046	0.00196834
MIMAT0003386	7.05067	144269484	1.20631	0.000110557	0.00196834
MIMAT0000427	7.05821	144269484	1.50953	0.000112649	0.00199297
MIMAT0004751	4.76687	4.77058	5.25418	0.000114569	0.00201045
MIMAT0004503	-6.59484	-1.44269e+08	0.701634	0.000115066	0.00201045
MIMAT0004695	7.03768	144269484	1.52162	0.000117962	0.00204831
MIMAT0026625	6.96812	1.44269e+08	1.04076	0.000133546	0.00229654
MIMAT0001413	4.55375	4.55395	9.9752	0.00013389	0.00229654
MIMAT0000226_1	-4.66124	-4.66408	7.20694	0.000142891	0.00243607
MIMAT0026917	-5.81934	-5.97629	-1.30952	0.000144374	0.00244653
MIMAT0000318	-4.65696	-4.65832	6.44889	0.000147603	0.00248627
MIMAT0000072	4.73714	4.75269	5.3528	0.000154063	0.00257964
MIMAT0015378	6.88446	1.44269e+08	0.111431	0.000162836	0.00271039
MIMAT0000232_1	4.49911	4.49995	9.56198	0.000167896	0.00277818
MIMAT0000253	-4.24854	-4.24855	14.3412	0.00017298	0.00284557
MIMAT0000232	4.47371	4.47451	9.56872	0.00018056	0.00295299
MIMAT0000449	-4.50378	-4.50397	7.92054	0.000198898	0.00322682
MIMAT0004591_2	4.75925	4.81742	2.88395	0.000199597	0.00322682
MIMAT0026719	6.78388	1.44269e+08	0.19504	0.000208072	0.00334461
MIMAT0003214	6.77088	1.44269e+08	0.158357	0.000216655	0.00346279
MIMAT0000103	4.41023	4.41063	8.67053	0.000239637	0.00380847
MIMAT0000415	-4.07131	-4.07131	15.6149	0.000242608	0.00383402
MIMAT0004563	4.3595	4.36022	9.56016	0.000251664	0.00395492
MIMAT0000462	4.61078	4.68087	1.23731	0.000281139	0.00439358
MIMAT0002805	5.33049	5.65484	1.0402	0.000285857	0.00444262
MIMAT0000067	-4.07552	-4.07552	14.3207	0.000289565	0.0044663
MIMAT0000454	4.39772	4.39838	7.28794	0.000290556	0.0044663
MIMAT0005941	4.53776	4.59559	1.22099	0.000293193	0.00448235
MIMAT0004591_1	4.57553	4.62554	2.88461	0.00029902	0.00454672
MIMAT0000067_1	-4.04938	-4.04939	14.4069	0.000308895	0.00467162
MIMAT0019768	-4.30747	-4.3483	0.900283	0.000312662	0.0047033
MIMAT0025851	-4.23384	-4.23704	2.1612	0.000315511	0.00471712
MIMAT0021124	-6.82378	-1.44269e+08	-1.25252	0.000316934	0.00471712
MIMAT0004959	4.3547	4.35563	7.53482	0.000320886	0.00473052
MIMAT0026721	4.70706	4.79395	2.60393	0.000323158	0.00473052
MIMAT0018084	6.60796	1.44269e+08	0.221119	0.000324085	0.00473052
MIMAT0007891	6.8346	1.44269e+08	-0.669232	0.000324561	0.00473052
MIMAT0001536	-4.49426	-4.58879	1.03422	0.000359885	0.00521834
MIMAT0004493	5.26806	5.59211	1.50842	0.000363657	0.00524567
MIMAT0002881_2	4.52204	4.56559	3.63274	0.0003655	0.00524567
MIMAT0003283	-4.21903	-4.21918	9.66654	0.000367431	0.00524662
MIMAT0004778	4.91048	5.08065	1.81551	0.000378083	0.00537145
MIMAT0018098	6.97938	1.44269e+08	-1.0768	0.000403765	0.00570749
MIMAT0015001	-4.22498	-4.26526	1.01488	0.000409937	0.00576576
MIMAT0004484	-4.1947	-4.19482	9.23636	0.000413613	0.00578853
MIMAT0024614	-5.05159	-5.20914	-1.02698	0.000457381	0.00636938
MIMAT0020958	6.59375	1.44269e+08	-0.451498	0.000463534	0.00642326
MIMAT0004916	-4.06665	-4.07453	1.98936	0.000522746	0.00720825
MIMAT0000682	-4.23005	-4.25795	3.30255	0.000529206	0.00726174
MIMAT0004507	4.14474	4.14513	7.73025	0.000558606	0.00762795
MIMAT0015028	6.36319	1.44269e+08	0.320225	0.000574153	0.00780237
MIMAT0021030	6.64219	1.44269e+08	-0.828302	0.000592758	0.00801648
MIMAT0009198	6.39117	1.44269e+08	-0.149983	0.000607907	0.00814943
MIMAT0004926	4.06126	4.06138	8.95573	0.000608382	0.00814943
MIMAT0004481	-4.12595	-4.12749	6.50535	0.000646388	0.00859769
MIMAT0003883	6.57383	1.44269e+08	-0.768581	0.000647959	0.00859769
MIMAT0000065	-3.94021	-3.94024	10.8174	0.000674387	0.00890634
MIMAT0004975	4.15349	4.1622	4.93814	0.00068823	0.00904669
MIMAT0004514	-4.09322	-4.12137	3.07269	0.00072108	0.00942389
MIMAT0004607	-4.28694	-4.38081	1.6254	0.000723626	0.00942389

## Sheet: iNSC54 - GIC54_smRNA_DEList_glm
	logFC	unshrunk.logFC	logCPM	PValue	FDR
MIMAT0000063	-11.6629	-11.6634	14.654	1.04e-15	2.19e-12		88	Up-regulated
MIMAT0022721	16.0581	144269493	7.47286	1.55e-15	2.19e-12		79	Down-regulated
MIMAT0005899	15.788	1.44269e+08	6.86029	4.75e-15	4.46e-12
MIMAT0000683	11.4063	11.4266	7.28652	2.87e-13	2.02e-10
MIMAT0004482	-10.9829	-11.1064	6.58034	2.87e-12	1.61e-09
MIMAT0000415	-8.8497	-8.84972	15.6149	1.45e-11	6.32e-09
MIMAT0002875	9.69329	9.69758	9.20486	1.68e-11	6.32e-09
MIMAT0000266	13.1306	1.44269e+08	5.55946	1.84e-11	6.32e-09
MIMAT0000226	-9.80035	-9.8052	7.65884	2.02e-11	6.32e-09
MIMAT0000442	-9.29238	-9.29341	10.6664	2.94e-11	6.63e-09
MIMAT0000717	12.6374	1.44269e+08	2.19744	2.98e-11	6.63e-09
MIMAT0005924	12.8679	1.44269e+08	3.95279	3.27e-11	6.63e-09
MIMAT0000226_1	-9.68921	-9.69529	7.20694	3.43e-11	6.63e-09
MIMAT0000442_1	-9.2334	-9.23439	10.6615	3.57e-11	6.63e-09
MIMAT0000062	-8.78625	-8.78633	14.0655	3.7e-11	6.63e-09
MIMAT0000062_1	-8.77476	-8.77484	14.0747	3.84e-11	6.63e-09
MIMAT0000461	-9.72138	-9.73846	6.82573	4e-11	6.63e-09
MIMAT0000718	12.5268	1.44269e+08	2.36773	4.52e-11	6.67e-09
MIMAT0000062_2	-8.72001	-8.72009	14.0699	4.66e-11	6.67e-09
MIMAT0000442_2	-9.14664	-9.14757	10.6618	4.75e-11	6.67e-09
MIMAT0000715	9.82502	9.84934	5.27479	5.16e-11	6.91e-09
MIMAT0000684	10.1595	10.3859	2.50138	1.69e-10	2.15e-08
MIMAT0000275_1	8.98017	8.99034	9.56943	1.76e-10	2.15e-08
MIMAT0000275	8.84813	8.85685	9.63644	2.5e-10	2.93e-08
MIMAT0000414	-8.12965	-8.12968	14.7336	2.82e-10	3.18e-08
MIMAT0000067	-7.99574	-7.99578	14.3207	5.35e-10	5.79e-08
MIMAT0000096	-8.43067	-8.43189	10.0701	6.17e-10	6.39e-08
MIMAT0000067_1	-7.93721	-7.93725	14.4069	6.36e-10	6.39e-08
MIMAT0019930	11.6294	1.44269e+08	1.88966	7.26e-10	7.05e-08
MIMAT0002173	8.42376	8.43074	10.0913	7.9e-10	7.41e-08
MIMAT0003882	9.35039	9.46802	4.18454	1.3e-09	1.18e-07
MIMAT0000724	8.51176	8.53201	7.80203	1.9e-09	1.67e-07
MIMAT0004481	-8.50089	-8.52894	6.50535	1.97e-09	1.68e-07
MIMAT0004959	8.14282	8.14612	7.53482	3.82e-09	3.05e-07
MIMAT0004615	-8.15118	-8.15509	7.25708	3.82e-09	3.05e-07
MIMAT0002820	-8.93894	-9.17205	4.54419	3.9e-09	3.05e-07
MIMAT0004566	11.1216	1.44269e+08	2.42379	4.28e-09	3.26e-07
MIMAT0000065	-7.60163	-7.60194	10.8174	7.12e-09	5.27e-07
MIMAT0003250	9.16997	9.39628	6.09125	9.07e-09	6.54e-07
MIMAT0000086	-7.52006	-7.52176	10.2809	1.12e-08	7.85e-07
MIMAT0000716	10.6145	1.44269e+08	0.218158	1.16e-08	7.95e-07
MIMAT0000441	-7.0326	-7.03262	15.0871	1.22e-08	8.06e-07
MIMAT0000441_2	-7.02609	-7.02611	15.0864	1.25e-08	8.06e-07
MIMAT0000441_1	-7.02436	-7.02438	15.0862	1.26e-08	8.06e-07
MIMAT0004481_1	-7.73525	-7.75558	6.33295	1.88e-08	1.17e-06
MIMAT0000098	-6.72228	-6.72228	15.8211	2.92e-08	1.79e-06
MIMAT0002881_2	10.5067	1.44269e+08	3.63274	4.09e-08	2.45e-06
MIMAT0004508	7.22262	7.22552	6.4428	7.65e-08	4.48e-06
MIMAT0000102	7.53462	7.59439	3.62593	9.25e-08	5.31e-06
MIMAT0025463	9.97393	1.44269e+08	0.930548	1.04e-07	5.85e-06
MIMAT0026721	10.0785	144269487	2.60393	1.17e-07	6.46e-06
MIMAT0005923	7.2681	7.29823	5.60051	1.51e-07	8.17e-06
MIMAT0022717	10.052	144269487	3.92339	1.78e-07	9.46e-06
MIMAT0004484	-6.60076	-6.60149	9.23636	2.77e-07	1.44e-05
MIMAT0002881_1	7.89358	8.11936	3.6479	3.36e-07	1.72e-05
MIMAT0018934	-8.66738	-1.44269e+08	2.41421	4.14e-07	2.08e-05
MIMAT0002881	7.77976	8.00547	3.65004	4.74e-07	2.33e-05
MIMAT0005887	-7.09174	-7.32748	1.68716	4.8e-07	2.33e-05
MIMAT0000454	6.50131	6.50305	7.28794	6.05e-07	2.89e-05
MIMAT0000102_1	6.71091	6.74523	3.61078	6.45e-07	3.02e-05
MIMAT0004761	6.53025	6.53993	7.65267	6.64e-07	3.06e-05
MIMAT0004552	6.52394	6.52878	6.77225	6.76e-07	3.07e-05
MIMAT0000064	-6.03435	-6.03438	12.8595	7.25e-07	3.24e-05
MIMAT0025455	-8.36579	-1.44269e+08	1.04095	7.83e-07	3.44e-05
MIMAT0004565	7.41175	7.63714	1.88947	9.9e-07	4.28e-05
MIMAT0005918	9.22589	1.44269e+08	1.05416	1.15e-06	4.89e-05
MIMAT0026472	-6.24454	-6.24993	5.8851	1.47e-06	6.17e-05
MIMAT0019928	-8.60405	-1.44269e+08	-0.784106	1.54e-06	6.39e-05
MIMAT0019928_1	-8.49058	-1.44269e+08	-0.680274	1.67e-06	6.8e-05
MIMAT0010195	-6.52303	-6.68524	2.22656	1.86e-06	7.49e-05
MIMAT0000250	6.06331	6.06479	8.22982	1.9e-06	7.55e-05
MIMAT0002878	6.63105	6.69056	4.91529	2e-06	7.82e-05
MIMAT0000100_1	-6.12864	-6.15487	3.67726	2.06e-06	7.96e-05
MIMAT0000084	-5.85618	-5.85641	10.4114	2.25e-06	8.54e-05
MIMAT0000100	-6.01727	-6.04116	3.71461	2.8e-06	0.000104958
MIMAT0026612	8.89749	1.44269e+08	0.24049	2.88e-06	0.000106633
MIMAT0019747	6.01732	6.02564	4.17782	3.22e-06	0.000117721
MIMAT0001545_1	-5.92014	-5.92442	6.60433	3.77e-06	0.000136106
MIMAT0004514	-5.9261	-5.97203	3.07269	4.02e-06	0.000143027
MIMAT0019047	-5.99379	-6.09253	1.39676	4.3e-06	0.000151164
MIMAT0022844	5.80613	5.81136	5.58369	6.04e-06	0.000209836
MIMAT0019939	-6.18979	-6.4169	0.3589	6.13e-06	0.000210121
MIMAT0003328	6.16208	6.22134	3.71898	6.39e-06	0.000216516
MIMAT0019219	-7.80998	-1.44269e+08	-0.32705	6.52e-06	0.000218331
MIMAT0004778	8.62181	1.44269e+08	1.81551	8.15e-06	0.000269762
MIMAT0001545	-5.63705	-5.64053	6.56989	8.72e-06	0.000285174
MIMAT0002821	-5.53633	-5.53727	8.38754	8.94e-06	0.000289063
MIMAT0000281	-5.48786	-5.48801	9.0257	9.19e-06	0.000293623
MIMAT0019772	8.48876	1.44269e+08	0.202183	9.76e-06	0.000308335
MIMAT0000681	-5.55969	-5.61127	1.91522	1.09e-05	0.000340795
MIMAT0024614	-8.08405	-144269485	-1.02698	1.15e-05	0.000354017
MIMAT0003214	8.41312	1.44269e+08	0.158357	1.22e-05	0.00037384
MIMAT0019756	-8.41856	-1.44269e+08	-1.33992	1.27e-05	0.000384591
MIMAT0025849	8.40679	1.44269e+08	1.07554	1.31e-05	0.000392411
MIMAT0004559	-5.54916	-5.56386	4.76201	1.35e-05	0.000398708
MIMAT0001412	6.15287	6.26905	2.6983	1.38e-05	0.00040343
MIMAT0000268	5.46821	5.47434	6.79272	1.66e-05	0.00048001
MIMAT0025470	8.37845	1.44269e+08	3.30986	1.82e-05	0.00052325
MIMAT0002806	8.28069	1.44269e+08	1.03652	1.87e-05	0.000532048
MIMAT0000726	8.26845	1.44269e+08	1.98975	2.21e-05	0.000621133
MIMAT0000089	5.88775	5.96604	7.12297	2.26e-05	0.000629225
MIMAT0001636	-5.23213	-5.27286	1.49989	2.28e-05	0.000629225
MIMAT0004585	-5.19608	-5.23136	1.67962	2.63e-05	0.000717233
MIMAT0000242	5.18664	5.18716	8.10248	2.68e-05	0.000725136
MIMAT0002883_2	8.24989	1.44269e+08	4.28921	2.98e-05	0.000797974
MIMAT0004605	5.23357	5.25988	2.19942	3.47e-05	0.000921633
MIMAT0000242_1	5.08799	5.08847	8.08774	3.6e-05	0.000942319
MIMAT0000430_1	-5.0774	-5.09251	3.22678	3.62e-05	0.000942319
MIMAT0004486	-5.09012	-5.10594	3.53481	3.92e-05	0.00101205
MIMAT0004607	-4.95929	-4.9787	1.6254	4.3e-05	0.00109397
MIMAT0000430	-5.03224	-5.06688	1.63667	4.32e-05	0.00109397
MIMAT0031074	-5.01359	-5.02149	3.92234	5.07e-05	0.00127226
MIMAT0001080	-4.97874	-4.98098	7.84071	5.23e-05	0.00130177
MIMAT0022700	-4.96007	-4.9916	2.30956	5.57e-05	0.00137479
MIMAT0004601	5.06565	5.0775	5.92768	6.38e-05	0.00155993
MIMAT0028222	7.8083	1.44269e+08	1.62762	7.3e-05	0.00176996
MIMAT0005789	7.75671	1.44269e+08	1.71479	8.49e-05	0.00203083
MIMAT0002880	5.3281	5.38672	4.74801	8.52e-05	0.00203083
MIMAT0004497	-4.85639	-4.86326	5.68795	9.04e-05	0.00213672
MIMAT0000254	-4.41152	-4.41153	15.1549	9.27e-05	0.00217298
MIMAT0000738	5.05169	5.11002	1.4478	0.00010996	0.00255633
MIMAT0025851	7.65534	1.44269e+08	2.1612	0.000114556	0.00264135
MIMAT0004512	-6.65774	-1.44269e+08	0.404704	0.0001215	0.0027618
MIMAT0009198	-4.66784	-4.70528	-0.149983	0.000121743	0.0027618
MIMAT0026608	-4.85039	-4.94196	0.352938	0.00012366	0.00278284
MIMAT0003385	4.67509	4.67566	7.25593	0.000133625	0.00298324
MIMAT0000078	-4.5426	-4.54279	10.1637	0.000134827	0.00298636
MIMAT0004556	-4.68987	-4.69185	5.93573	0.000135994	0.00298867
MIMAT0004779_1	7.55447	1.44269e+08	2.18322	0.000144803	0.00315761
MIMAT0004928	-4.59188	-4.62443	1.50326	0.000148628	0.00321607
MIMAT0000423	-4.40809	-4.40811	12.1563	0.00015324	0.00327036
MIMAT0027514	4.68437	4.71035	1.43232	0.000153461	0.00327036
MIMAT0000423_1	-4.40233	-4.40234	12.1041	0.00015705	0.00332167
MIMAT0004779	7.50282	1.44269e+08	2.16258	0.000163984	0.00344244
MIMAT0022694	7.47632	1.44269e+08	-0.0757875	0.000169427	0.00353036
MIMAT0003389	-4.60407	-4.60895	6.70744	0.000178614	0.00369442
MIMAT0000437	4.87419	4.9077	5.605	0.000183755	0.00377302
MIMAT0000258	-4.64809	-4.68995	2.73196	0.000185849	0.00378835
MIMAT0004503	-6.47774	-1.44269e+08	0.701634	0.000196586	0.00397839
MIMAT0004501	-4.48539	-4.48603	7.5835	0.000219121	0.0043901
MIMAT0004797	-4.5311	-4.53915	7.19237	0.000220051	0.0043901
MIMAT0004763	-4.46425	-4.48492	2.65313	0.00022489	0.00445503
MIMAT0019871	4.48755	4.49059	3.95649	0.000229025	0.00450522
MIMAT0000066	-4.2419	-4.24192	11.9378	0.000253452	0.00495111
MIMAT0000435	4.24277	4.24308	11.8799	0.000257264	0.00499093
MIMAT0003161	4.39744	4.39809	8.21367	0.000264807	0.00507089
MIMAT0002859	4.59783	4.64413	0.178762	0.000264991	0.00507089
MIMAT0019951	7.30158	1.44269e+08	3.13872	0.000272918	0.00518729
MIMAT0002805	4.79106	4.86781	1.0402	0.000300106	0.00563407
MIMAT0000097	-4.04919	-4.04919	14.6043	0.000300462	0.00563407
MIMAT0001635	-4.40054	-4.40136	5.99715	0.000302433	0.00563407
MIMAT0018206	5.38948	5.61112	-0.0241731	0.000310066	0.00570817
MIMAT0017999	-5.41741	-5.84644	-0.455806	0.000310469	0.00570817
MIMAT0002859_1	4.5146	4.56078	0.0287602	0.000341657	0.00624079
MIMAT0000076	-3.89174	-3.89174	16.9723	0.000346099	0.00628115
MIMAT0001341	-4.40784	-4.42398	6.03473	0.000356116	0.00641082
MIMAT0018084	4.57613	4.63372	0.221119	0.000357803	0.00641082
MIMAT0000094	-4.28014	-4.28032	8.19555	0.000363611	0.00647366
MIMAT0004496	-4.20987	-4.21496	2.79095	0.000379474	0.00671358
MIMAT0004909	-4.26722	-4.26768	7.99339	0.000386315	0.00679189
MIMAT0004975	4.49793	4.52119	4.93814	0.000414706	0.00724576
MIMAT0026741	4.40483	4.45087	1.32552	0.000527644	0.00916212
MIMAT0004592	-4.05312	-4.05316	10.1902	0.000536428	0.00925749
MIMAT0015002	7.62443	1.44269e+08	-1.33369	0.000548786	0.00941301
MIMAT0004804	-4.03655	-4.04942	1.6292	0.000571242	0.0097187
MIMAT0030412	-6.74022	-1.44269e+08	-1.40228	0.000573517	0.0097187
MIMAT0019853	-4.33325	-4.42166	-0.00630355	0.000582447	0.00981092

## Sheet: iNSC61 - GIC61_smRNA_DEList_glm
	logFC	unshrunk.logFC	logCPM	PValue	FDR
MIMAT0000275	12.253	12.2669	9.63644	4.21e-15	1.18e-11		48	Up-regulated
MIMAT0000275_1	12.0201	12.0322	9.56943	8.94e-15	1.26e-11		129	Down-regulated
MIMAT0022721	14.2753	1.44269e+08	7.47286	4.26e-14	3.99e-11
MIMAT0000063	-9.5446	-9.54482	14.654	1.92e-12	1.35e-09
MIMAT0005903	12.6586	1.44269e+08	2.5598	3.08e-12	1.74e-09
MIMAT0003250	11.4772	11.8317	6.09125	5.32e-12	2.49e-09
MIMAT0000724	9.81659	9.82074	7.80203	1.84e-11	7.4e-09
MIMAT0004482	-9.82827	-9.89562	6.58034	4.32e-11	1.41e-08
MIMAT0000089	10.7368	11.0911	7.12297	4.5e-11	1.41e-08
MIMAT0005899	10.0294	10.1572	6.86029	7.73e-11	2.17e-08
MIMAT0000266	9.56008	9.58669	5.55946	8.91e-11	2.28e-08
MIMAT0003328	10.1938	10.5481	3.71898	1.84e-10	4.32e-08
MIMAT0000435	8.47669	8.47697	11.8799	2.69e-10	5.82e-08
MIMAT0022717	11.4125	1.44269e+08	3.92339	3.23e-10	6.49e-08
MIMAT0005924	11.3386	1.44269e+08	3.95279	4.13e-10	7.74e-08
MIMAT0004779	10.9561	1.44269e+08	2.16258	6.95e-10	1.16e-07
MIMAT0000726	8.73778	8.81563	1.98975	7.04e-10	1.16e-07
MIMAT0004599	8.78392	8.86177	3.47245	1.13e-09	1.77e-07
MIMAT0002875	8.23156	8.23943	9.20486	1.81e-09	2.65e-07
MIMAT0004601	8.55503	8.58003	5.92768	1.88e-09	2.65e-07
MIMAT0000231_1	8.19826	8.20198	8.17508	2.55e-09	3.42e-07
MIMAT0000437	8.36599	8.38199	5.605	2.88e-09	3.61e-07
MIMAT0000231	8.1512	8.15485	8.17581	2.95e-09	3.61e-07
MIMAT0026625	10.3402	1.44269e+08	1.04076	3.17e-09	3.71e-07
MIMAT0004566	10.4405	1.44269e+08	2.42379	3.89e-09	4.38e-07
MIMAT0026741	8.69856	9.05238	1.32552	8.21e-09	8.88e-07
MIMAT0000686	7.89084	7.89722	6.95683	9.85e-09	1.03e-06
MIMAT0000683	7.85807	7.87007	7.28652	1.11e-08	1.12e-06
MIMAT0004565	9.77506	1.44269e+08	1.88947	2.89e-08	2.81e-06
MIMAT0004977	9.93179	1.44269e+08	-0.455678	3.18e-08	2.98e-06
MIMAT0000684	8.37794	8.73181	2.50138	3.54e-08	3.22e-06
MIMAT0019951	9.67937	1.44269e+08	3.13872	4.77e-08	4.19e-06
MIMAT0004953	9.46593	1.44269e+08	1.07222	5.73e-08	4.89e-06
MIMAT0005893	9.42698	1.44269e+08	0.00893407	6.12e-08	5.06e-06
MIMAT0000718	7.59031	7.71762	2.36773	6.57e-08	5.28e-06
MIMAT0002881	8.24376	8.59727	3.65004	7.8e-08	6.09e-06
MIMAT0001413	6.90709	6.90731	9.9752	8.65e-08	6.57e-06
MIMAT0002805	9.30049	1.44269e+08	1.0402	9.65e-08	7.14e-06
MIMAT0004508	7.18905	7.2089	6.4428	1.11e-07	8.02e-06
MIMAT0002883_1	7.04745	7.05787	4.32937	1.39e-07	9.8e-06
MIMAT0002878	7.17188	7.2156	4.91529	1.77e-07	1.21e-05
MIMAT0000717	7.8132	8.16637	2.19744	2.01e-07	1.34e-05
MIMAT0004975	7.03212	7.06031	4.93814	2.11e-07	1.38e-05
MIMAT0002883_2	6.89125	6.9007	4.28921	2.16e-07	1.38e-05
MIMAT0000442_2	-6.53837	-6.53857	10.6618	2.38e-07	1.47e-05
MIMAT0002883	6.8588	6.868	4.31781	2.41e-07	1.47e-05
MIMAT0000442	-6.52573	-6.52592	10.6664	2.47e-07	1.48e-05
MIMAT0000442_1	-6.51015	-6.51034	10.6615	2.6e-07	1.52e-05
MIMAT0004779_1	7.02116	7.11772	2.18322	2.65e-07	1.52e-05
MIMAT0004752	6.89025	6.91494	4.30814	2.89e-07	1.63e-05
MIMAT0000062_1	-6.13718	-6.13723	14.0747	3.77e-07	2.07e-05
MIMAT0000062	-6.13316	-6.1332	14.0655	3.83e-07	2.07e-05
MIMAT0001412	6.55311	6.57772	2.6983	4.2e-07	2.2e-05
MIMAT0000062_2	-6.10491	-6.10496	14.0699	4.22e-07	2.2e-05
MIMAT0005918	8.82443	1.44269e+08	1.05416	4.42e-07	2.26e-05
MIMAT0000268	6.51838	6.52133	6.79272	6.2e-07	3.11e-05
MIMAT0000103	6.33928	6.33966	8.67053	7.11e-07	3.47e-05
MIMAT0004676	6.76158	6.8389	3.64189	7.15e-07	3.47e-05
MIMAT0002881_1	6.91205	7.03898	3.6479	8.18e-07	3.9e-05
MIMAT0004778	6.94185	7.12845	1.81551	8.5e-07	3.94e-05
MIMAT0005944	8.73364	1.44269e+08	-0.272979	8.54e-07	3.94e-05
MIMAT0004517	6.24457	6.26343	2.77805	1.02e-06	4.61e-05
MIMAT0017989	6.56332	6.6595	2.27699	1.16e-06	5.18e-05
MIMAT0010195	-6.18779	-6.2413	2.22656	1.27e-06	5.6e-05
MIMAT0003385	6.24115	6.24643	7.25593	1.4e-06	6.07e-05
MIMAT0000646	-5.90846	-5.90855	11.5963	1.47e-06	6.28e-05
MIMAT0002881_2	6.56928	6.66534	3.63274	1.63e-06	6.84e-05
MIMAT0004925	8.41172	1.44269e+08	1.24976	1.68e-06	6.95e-05
MIMAT0000715	6.22181	6.23409	5.27479	1.85e-06	7.55e-05
MIMAT0000707	5.69857	5.69859	12.999	2.15e-06	8.63e-05
MIMAT0028222	8.34051	1.44269e+08	1.62762	2.28e-06	9.04e-05
MIMAT0018204	6.23675	6.30133	2.98774	2.36e-06	9.24e-05
MIMAT0019219	-7.62955	-1.44269e+08	-0.32705	2.52e-06	9.58e-05
MIMAT0001635	6.06378	6.06752	5.99715	2.53e-06	9.58e-05
MIMAT0021086	8.30343	1.44269e+08	-0.133775	2.55e-06	9.58e-05
MIMAT0025455	-7.46174	-1.44269e+08	1.04095	2.79e-06	0.00010309
MIMAT0000441_1	-5.46407	-5.46407	15.0862	2.97e-06	0.000106499
MIMAT0000441	-5.4635	-5.4635	15.0871	2.98e-06	0.000106499
MIMAT0000441_2	-5.46247	-5.46247	15.0864	2.99e-06	0.000106499
MIMAT0000098	-5.40489	-5.4049	15.8211	3.1e-06	0.000109041
MIMAT0004484	-5.81732	-5.81797	9.23636	3.22e-06	0.000111693
MIMAT0004677	6.86257	7.21468	1.85618	3.62e-06	0.000124333
MIMAT0000716	8.0625	144269485	0.218158	4.25e-06	0.000144164
MIMAT0000461	-5.86153	-5.86729	6.82573	4.49e-06	0.000150287
MIMAT0002820	-5.83496	-5.84583	4.54419	5.16e-06	0.000170049
MIMAT0019059	6.28146	6.40812	-0.41968	5.2e-06	0.000170049
MIMAT0019232	8.07941	144269485	-0.283913	5.97e-06	0.00019319
MIMAT0005941	6.629	6.98062	1.22099	6.23e-06	0.000199211
MIMAT0022694	6.61009	6.96145	-0.0757875	6.61e-06	0.000208772
MIMAT0003321	5.71156	5.71754	4.09968	6.7e-06	0.000209416
MIMAT0025470	8.01619	144269485	3.30986	7.03e-06	0.000217355
MIMAT0004947	-5.63754	-5.68112	2.61086	7.11e-06	0.000217531
MIMAT0031181	7.96116	1.44269e+08	2.50843	7.66e-06	0.000231586
MIMAT0004615	-5.65209	-5.65687	7.25708	7.85e-06	0.000234768
MIMAT0000414	-5.17919	-5.1792	14.7336	8.43e-06	0.000249575
MIMAT0013516	-5.96576	-6.17835	-0.332853	9.47e-06	0.000275652
MIMAT0013515	-5.53231	-5.58896	1.76795	9.51e-06	0.000275652
MIMAT0000428	5.54258	5.54378	6.22738	1.13e-05	0.000325712
MIMAT0002880	5.57189	5.58339	4.74801	1.26e-05	0.000357776
MIMAT0018934	-5.99316	-6.30255	2.41421	1.3e-05	0.000366211
MIMAT0000415	-4.99605	-4.99605	15.6149	1.32e-05	0.000366457
MIMAT0004486	-5.42721	-5.44381	3.53481	1.33e-05	0.000367014
MIMAT0004751	5.54276	5.55535	5.25418	1.4e-05	0.000383235
MIMAT0000281	5.31032	5.3111	9.0257	1.6e-05	0.000432602
MIMAT0022702	8.15044	1.44269e+08	-0.988102	1.73e-05	0.000460023
MIMAT0005881	5.41544	5.41996	6.82966	1.73e-05	0.000460023
MIMAT0000065	-5.1636	-5.16372	10.8174	1.84e-05	0.00048368
MIMAT0001636	5.36129	5.40438	1.49989	1.89e-05	0.00049341
MIMAT0019805	-5.12564	-5.15353	1.19132	2.12e-05	0.00053814
MIMAT0015015	-5.17037	-5.23049	0.302914	2.12e-05	0.00053814
MIMAT0005878	5.36422	5.37986	3.92204	2.12e-05	0.00053814
MIMAT0000067	-4.89377	-4.89379	14.3207	2.35e-05	0.000591136
MIMAT0021030	7.86605	1.44269e+08	-0.828302	2.51e-05	0.000625233
MIMAT0000428_1	5.25998	5.26096	6.24097	2.6e-05	0.00064057
MIMAT0004481	-5.24829	-5.24972	6.50535	2.66e-05	0.000651417
MIMAT0004481_1	-5.23786	-5.23943	6.33295	2.76e-05	0.000668669
MIMAT0018969	7.39572	1.44269e+08	0.342876	2.88e-05	0.000692738
MIMAT0000067_1	-4.81109	-4.81111	14.4069	3.04e-05	0.00072465
MIMAT0019928_1	-6.93756	-1.44269e+08	-0.680274	3.07e-05	0.000725729
MIMAT0022702_1	8.05422	144269485	-1.1404	3.18e-05	0.000744911
MIMAT0004503	-5.3883	-5.59945	0.701634	3.39e-05	0.000788103
MIMAT0004555	5.1694	5.17416	6.55512	3.6e-05	0.000830193
MIMAT0003214	5.18446	5.26082	0.158357	4.26e-05	0.000975059
MIMAT0019030	8.60119	1.44269e+08	-1.64959	4.7e-05	0.00106652
MIMAT0004948	-4.94288	-4.97481	2.18011	5.04e-05	0.0011344
MIMAT0022269	5.20168	5.2962	0.123637	5.22e-05	0.001166
MIMAT0026484	8.43247	1.44269e+08	-1.60797	5.6e-05	0.0012403
MIMAT0018084	5.47555	5.65964	0.221119	5.7e-05	0.0012531
MIMAT0005908	5.28287	5.40769	0.865394	5.95e-05	0.00129753
MIMAT0005905	5.00329	5.0353	3.40141	6.86e-05	0.00148349
MIMAT0019738	5.45045	5.63462	1.69549	7.74e-05	0.0016544
MIMAT0026612	7.03917	144269484	0.24049	7.76e-05	0.0016544
MIMAT0026621	7.44987	1.44269e+08	-0.918638	8.19e-05	0.00173268
MIMAT0026478	8.23171	1.44269e+08	-1.61436	8.49e-05	0.00177832
MIMAT0019047	-4.82452	-4.88977	1.39676	8.53e-05	0.00177832
MIMAT0005789	5.04277	5.11876	1.71479	8.65e-05	0.00178925
MIMAT0003882	4.84094	4.84535	4.18454	8.71e-05	0.00178944
MIMAT0000253	4.46686	4.46688	14.3412	9.02e-05	0.00183817
MIMAT0005905_1	4.8125	4.84193	3.43567	0.00011628	0.0023532
MIMAT0000064	-4.46056	-4.46057	12.8595	0.000117759	0.00236612
MIMAT0015001	-4.70939	-4.7897	1.01488	0.00012463	0.00248641
MIMAT0019772	6.81277	1.44269e+08	0.202183	0.000141117	0.00279551
MIMAT0004761	4.62922	4.63237	7.65267	0.0001509	0.00296839
MIMAT0002173	4.49595	4.49675	10.0913	0.000158101	0.00308845
MIMAT0000427	4.48201	4.4936	1.50953	0.000160944	0.00312232
MIMAT0000258	-4.49611	-4.5017	2.73196	0.000162103	0.00312326
MIMAT0000102_1	4.55515	4.56228	3.61078	0.000177518	0.003397
MIMAT0000728	4.58214	4.58411	6.09143	0.000185943	0.00353417
MIMAT0000102	4.51734	4.5242	3.62593	0.000197862	0.00373334
MIMAT0002877	6.81963	1.44269e+08	-0.425243	0.000199617	0.00373334
MIMAT0000427_1	4.39768	4.40889	1.48141	0.000202305	0.00373334
MIMAT0026618	6.81749	1.44269e+08	-0.444047	0.000202857	0.00373334
MIMAT0019928	-6.25401	-1.44269e+08	-0.784106	0.000203058	0.00373334
MIMAT0022270	4.61322	4.66738	1.22352	0.000204649	0.00373816
MIMAT0000096	-4.3854	-4.38568	10.0701	0.000216949	0.00393728
MIMAT0018197	-4.30553	-4.31801	1.24966	0.000224608	0.00405014
MIMAT0018936	5.74001	6.08893	-0.880492	0.000236637	0.00423988
MIMAT0027489	-4.47152	-4.56494	0.0433251	0.000257846	0.00459064
MIMAT0000416_1	4.44747	4.44814	6.64774	0.000263589	0.00466337
MIMAT0000232	4.33022	4.33033	9.56872	0.000270368	0.00475341
MIMAT0000232_1	4.31583	4.31594	9.56198	0.000282061	0.00492818
MIMAT0004563	4.31055	4.31066	9.56016	0.000286449	0.00497396
MIMAT0019912	-6.38247	-1.44269e+08	-1.19755	0.000290109	0.00500661
MIMAT0000416	4.37607	4.37667	6.73252	0.000320802	0.00550253
MIMAT0022702_2	5.74215	6.09081	-1.06099	0.000325571	0.00555049
MIMAT0020957	4.2938	4.33135	0.54309	0.000328527	0.00556715
MIMAT0000086	-4.22082	-4.22091	10.2809	0.000337225	0.00567282
MIMAT0000725	7.31242	1.44269e+08	-1.46951	0.000338796	0.00567282
MIMAT0002877_1	6.60002	1.44269e+08	-0.447968	0.000343959	0.00572519
MIMAT0018968	4.44601	4.49976	1.93517	0.000383959	0.00635339
MIMAT0003333	4.50018	4.5931	0.68435	0.000391585	0.00644169
MIMAT0015002	7.04633	144269484	-1.33369	0.000432484	0.00707312
MIMAT0000462	4.32642	4.38002	1.23731	0.000456156	0.00741715
MIMAT0026478_1	6.07078	6.42061	-1.53753	0.000465935	0.00753262
MIMAT0015038	4.68299	4.86432	1.0143	0.000581466	0.00934665
MIMAT0019971	-6.38245	-1.44269e+08	-1.55542	0.000594254	0.00949793
MIMAT0005925	5.16937	5.51518	-0.53731	0.000619552	0.00984632

## Sheet: iNSC18 - GIC18_smRNA_DEList_glm
	logFC	unshrunk.logFC	logCPM	PValue	FDR
MIMAT0000435	10.5035	10.5043	11.8799	3.07e-13	8.63e-10		49	Up-regulated
MIMAT0000281	10.6837	10.7002	9.0257	1.3e-12	1.83e-09		94	Down-regulated
MIMAT0019951	13.6367	1.44269e+08	3.13872	4.03e-12	2.73e-09
MIMAT0004284	11.2331	11.3302	5.86944	4.8e-12	2.73e-09
MIMAT0003250	11.6763	11.8639	6.09125	4.84e-12	2.73e-09
MIMAT0002173	9.36077	9.36187	10.0913	3.08e-11	1.28e-08
MIMAT0000707	8.9873	8.98896	12.999	3.21e-11	1.28e-08
MIMAT0000253	8.75237	8.75241	14.3412	3.69e-11	1.28e-08
MIMAT0001635	10.5332	10.6298	5.99715	4.09e-11	1.28e-08
MIMAT0004761	9.47024	9.47591	7.65267	6.73e-11	1.89e-08
MIMAT0004601	10.7678	10.9547	5.92768	7.92e-11	2.03e-08
MIMAT0000442_2	-8.79813	-8.79895	10.6618	1.51e-10	3.53e-08
MIMAT0000442_1	-8.75835	-8.75914	10.6615	1.72e-10	3.69e-08
MIMAT0000442	-8.73676	-8.73754	10.6664	1.84e-10	3.69e-08
MIMAT0000063	-8.11895	-8.11899	14.654	3.03e-10	5.69e-08
MIMAT0006790	9.91867	10.1061	2.51741	4.26e-10	7.48e-08
MIMAT0004599	9.90612	10.0929	3.47245	6.55e-10	1.08e-07
MIMAT0000441_1	-7.73752	-7.73756	15.0862	9.94e-10	1.43e-07
MIMAT0003321	12.0861	144269489	4.09968	9.97e-10	1.43e-07
MIMAT0000441_2	-7.73044	-7.73048	15.0864	1.02e-09	1.43e-07
MIMAT0000441	-7.71013	-7.71017	15.0871	1.1e-09	1.47e-07
MIMAT0022717	11.9899	1.44269e+08	3.92339	1.23e-09	1.48e-07
MIMAT0003385	9.36959	9.46658	7.25593	1.24e-09	1.48e-07
MIMAT0002878	8.72097	8.7353	4.91529	1.26e-09	1.48e-07
MIMAT0000437	8.60877	8.62287	5.605	1.78e-09	2.01e-07
MIMAT0000275_1	8.12	8.12137	9.56943	2.09e-09	2.26e-07
MIMAT0022721	8.73672	8.77595	7.47286	2.2e-09	2.29e-07
MIMAT0000268	8.33897	8.34304	6.79272	2.66e-09	2.67e-07
MIMAT0003266	8.89895	8.96379	7.17069	2.8e-09	2.72e-07
MIMAT0000275	7.96425	7.96541	9.63644	3.34e-09	3.13e-07
MIMAT0002875	8.00433	8.01116	9.20486	4.3e-09	3.9e-07
MIMAT0019738	11.2271	1.44269e+08	1.69549	6.69e-09	5.88e-07
MIMAT0000461	-7.82777	-7.83492	6.82573	1.34e-08	1.14e-06
MIMAT0005899	9.014	9.20128	6.86029	1.58e-08	1.3e-06
MIMAT0004959	-7.74151	-7.75215	7.53482	1.8e-08	1.45e-06
MIMAT0002880	7.58411	7.59052	4.74801	3.03e-08	2.37e-06
MIMAT0000773	10.8876	1.44269e+08	5.57983	4.04e-08	3.07e-06
MIMAT0002881	7.47872	7.49687	3.65004	4.32e-08	3.2e-06
MIMAT0004751	10.7491	1.44269e+08	5.25418	6.22e-08	4.49e-06
MIMAT0002881_1	7.30684	7.32328	3.6479	6.99e-08	4.91e-06
MIMAT0000274	-7.18979	-7.19674	6.2927	1e-07	6.88e-06
MIMAT0000459	7.02901	7.05727	1.88675	1.43e-07	9.53e-06
MIMAT0001636	10.2326	1.44269e+08	1.49989	1.48e-07	9.53e-06
MIMAT0005924	8.24841	8.43542	3.95279	1.49e-07	9.53e-06
MIMAT0002806	10.1353	1.44269e+08	1.03652	1.7e-07	1.07e-05
MIMAT0002883_1	7.03785	7.04957	4.32937	1.89e-07	1.15e-05
MIMAT0018934	-8.07577	-8.2801	2.41421	1.93e-07	1.16e-05
MIMAT0002883_2	7.00431	7.01594	4.28921	2.05e-07	1.18e-05
MIMAT0002881_2	6.90645	6.91891	3.63274	2.06e-07	1.18e-05
MIMAT0004482	-6.89967	-6.90431	6.58034	2.13e-07	1.2e-05
MIMAT0000231_1	6.69486	6.69528	8.17508	2.65e-07	1.46e-05
MIMAT0025470	6.97062	7.00362	3.30986	2.95e-07	1.59e-05
MIMAT0002820	-6.84722	-6.85766	4.54419	3.08e-07	1.64e-05
MIMAT0000231	6.61111	6.6115	8.17581	3.43e-07	1.79e-05
MIMAT0001413	6.48766	6.48898	9.9752	3.5e-07	1.79e-05
MIMAT0022844	-7.17786	-7.21986	5.58369	3.62e-07	1.82e-05
MIMAT0004508	7.94539	8.13164	6.4428	4.03e-07	1.99e-05
MIMAT0004975	6.686	6.68941	4.93814	4.15e-07	2.01e-05
MIMAT0026721	-7.82474	-8.02894	2.60393	4.38e-07	2.09e-05
MIMAT0004566	9.92298	1.44269e+08	2.42379	4.83e-07	2.26e-05
MIMAT0000262	-9.87402	-1.44269e+08	2.44753	4.98e-07	2.29e-05
MIMAT0004953	9.79528	1.44269e+08	1.07222	5.12e-07	2.32e-05
MIMAT0025455	-9.73973	-1.44269e+08	1.04095	5.46e-07	2.44e-05
MIMAT0005789	6.65551	6.69466	1.71479	6.55e-07	2.88e-05
MIMAT0000427_1	9.71993	1.44269e+08	1.48141	7.26e-07	3.14e-05
MIMAT0003161	6.34093	6.34181	8.21367	8.02e-07	3.42e-05
MIMAT0002883	6.47714	6.48492	4.31781	8.94e-07	3.75e-05
MIMAT0004752	9.83315	1.44269e+08	4.30814	9.13e-07	3.78e-05
MIMAT0004978	-6.36987	-6.3712	6.85871	9.67e-07	3.94e-05
MIMAT0004948	-6.75317	-6.8258	2.18011	1.31e-06	5.28e-05
MIMAT0013516	-9.49695	-1.44269e+08	-0.332853	1.81e-06	7.17e-05
MIMAT0002813	5.92333	5.9235	10.3814	1.83e-06	7.17e-05
MIMAT0000686	6.22379	6.23202	6.95683	1.96e-06	7.56e-05
MIMAT0004925	9.31395	1.44269e+08	1.24976	2.35e-06	8.95e-05
MIMAT0000273	-6.10011	-6.12188	3.13238	2.62e-06	9.83e-05
MIMAT0000263	5.87116	5.87136	9.05104	2.82e-06	0.000104517
MIMAT0004779	5.95249	5.96884	2.16258	3.12e-06	0.000113882
MIMAT0013515	-7.1211	-7.32469	1.76795	3.32e-06	0.000119751
MIMAT0004778	6.0002	6.02797	1.81551	3.8e-06	0.000135416
MIMAT0019930	-9.05748	-144269486	1.88966	5.2e-06	0.000182975
MIMAT0000254	5.28965	5.28966	15.1549	5.32e-06	0.000184808
MIMAT0001412	9.09429	144269486	2.6983	5.5e-06	0.000188846
MIMAT0022694	9.01916	144269486	-0.0757875	6.14e-06	0.000208013
MIMAT0019805	-6.0212	-6.0762	1.19132	6.31e-06	0.000211427
MIMAT0004517	6.79481	6.98028	2.77805	8.4e-06	0.000277937
MIMAT0005883	5.53782	5.54202	3.38144	9.06e-06	0.000296502
MIMAT0000416_1	5.63883	5.6428	6.64774	9.72e-06	0.000311798
MIMAT0000250	-5.5211	-5.52188	8.22982	9.75e-06	0.000311798
MIMAT0000416	5.62354	5.62733	6.73252	1.01e-05	0.000318756
MIMAT0027407	9.12274	1.44269e+08	-0.835432	1.45e-05	0.000454438
MIMAT0004779_1	5.37455	5.38551	2.18322	1.54e-05	0.000475497
MIMAT0026608	-8.56736	-1.44269e+08	0.352938	1.69e-05	0.000516798
MIMAT0026480	-6.43407	-6.63669	0.670171	1.94e-05	0.000587779
MIMAT0004947	-5.57391	-5.61153	2.61086	2.12e-05	0.000634004
MIMAT0002821	-5.19244	-5.19293	8.38754	2.52e-05	0.000746395
MIMAT0004555	5.31372	5.31916	6.55512	2.68e-05	0.000784386
MIMAT0022833	5.23402	5.23606	4.38445	2.95e-05	0.000856154
MIMAT0002877	6.40027	6.58575	-0.425243	3.27e-05	0.00093829
MIMAT0004595	-5.27984	-5.28772	6.43539	3.37e-05	0.000956821
MIMAT0000266	5.40628	5.42784	5.55946	3.61e-05	0.00101417
MIMAT0000232_1	4.96086	4.96096	9.56198	4.2e-05	0.001169
MIMAT0000232	4.95297	4.95307	9.56872	4.29e-05	0.00118418
MIMAT0004552	-5.09946	-5.10114	6.77225	4.34e-05	0.00118576
MIMAT0004676	5.63177	5.69579	3.64189	4.53e-05	0.0012265
MIMAT0004563	4.89537	4.89547	9.56016	5.11e-05	0.00136977
MIMAT0000427	5.6163	5.7111	1.50953	6.05e-05	0.00160572
MIMAT0000089	5.53991	5.60387	7.12297	6.38e-05	0.00167805
MIMAT0022702	8.62806	1.44269e+08	-0.988102	6.46e-05	0.0016816
MIMAT0000439_1	-5.19277	-5.22421	3.35889	6.55e-05	0.00169107
MIMAT0000454	4.86817	4.86893	7.28794	7.74e-05	0.00197823
MIMAT0000724	4.89463	4.90209	7.80203	8.63e-05	0.00218715
MIMAT0005955	4.79432	4.80092	3.27908	9.08e-05	0.00228057
MIMAT0017995	-8.00705	-144269485	-0.177361	9.66e-05	0.00240411
MIMAT0004559	-4.7924	-4.79722	4.76201	0.00011384	0.00280749
MIMAT0025463	-5.41265	-5.51469	0.930548	0.000114775	0.00280749
MIMAT0004565	5.41332	5.50816	1.88947	0.000119316	0.00289341
MIMAT0000258	-4.86888	-4.89445	2.73196	0.000121466	0.00292038
MIMAT0025849	4.73581	4.7568	1.07554	0.00012469	0.00297249
MIMAT0026620	7.91991	1.44269e+08	2.79735	0.000140074	0.00331116
MIMAT0000439	-4.86725	-4.89576	3.28241	0.000144383	0.00338459
MIMAT0005893	7.77419	1.44269e+08	0.00893407	0.000167702	0.00389873
MIMAT0005903	7.76341	1.44269e+08	2.5598	0.000200241	0.00461703
MIMAT0019939	-5.5874	-5.78818	0.3589	0.000232768	0.00532339
MIMAT0000738	7.66187	1.44269e+08	1.4478	0.000241322	0.00547451
MIMAT0026618	7.76292	1.44269e+08	-0.444047	0.000252823	0.00568953
MIMAT0024616	-7.75908	-1.44269e+08	-0.588523	0.000257714	0.00575357
MIMAT0031181	-4.76914	-4.8083	2.50843	0.000271804	0.00602036
MIMAT0015001	-5.10881	-5.21286	1.01488	0.000276296	0.00607204
MIMAT0000062_1	-4.08662	-4.08662	14.0747	0.000290432	0.00629569
MIMAT0019219	-7.60921	-1.44269e+08	-0.32705	0.000291368	0.00629569
MIMAT0000062_2	-4.08363	-4.08364	14.0699	0.000293187	0.00629569
MIMAT0000062	-4.07779	-4.07779	14.0655	0.000298441	0.00635996
MIMAT0000449	4.35329	4.35389	7.92054	0.000310642	0.00657019
MIMAT0015024	-4.79641	-4.8668	0.417774	0.000336079	0.00705515
MIMAT0002877_1	4.9045	4.96768	-0.447968	0.000349479	0.0072821
MIMAT0004512	-5.41894	-5.61923	0.404704	0.000365552	0.00756101
MIMAT0000098	-3.91968	-3.91968	15.8211	0.000372781	0.00765426
MIMAT0027488	-7.50742	-1.44269e+08	-0.386665	0.000388483	0.00791886
MIMAT0000103	4.243	4.24365	8.67053	0.000391937	0.00792461
MIMAT0022967	4.37607	4.40303	0.109618	0.000394399	0.00792461
MIMAT0019878	4.27426	4.27856	3.51371	0.000403647	0.0080529
MIMAT0015038	4.47627	4.51401	1.0143	0.000439203	0.00870055
MIMAT0030021	4.16131	4.16144	8.97757	0.000467705	0.00920038

## Sheet: iNSC19 - GIC19_smRNA_DEList_glm
	logFC	unshrunk.logFC	logCPM	PValue	FDR
MIMAT0022721	11.8744	11.948	7.47286	2.51e-13	7.05e-10		73	Up-regulated
MIMAT0003250	14.3595	1.44269e+08	6.09125	5.41e-13	7.61e-10		98	Down-regulated
MIMAT0000266	11.7266	11.8367	5.55946	1.05e-12	9.81e-10
MIMAT0005899	11.4478	11.5607	6.86029	2.25e-12	1.47e-09
MIMAT0000281	10.5922	10.6254	9.0257	2.61e-12	1.47e-09
MIMAT0000063	-9.28718	-9.28733	14.654	4.79e-12	2.24e-09
MIMAT0002173	9.50564	9.51857	10.0913	2.95e-11	1.19e-08
MIMAT0004761	10.4234	10.5362	7.65267	4.02e-11	1.41e-08
MIMAT0002875	9.01262	9.0167	9.20486	1.48e-10	4.63e-08
MIMAT0005924	12.2689	1.44269e+08	3.95279	2.76e-10	7.31e-08
MIMAT0000086	-8.64098	-8.64156	10.2809	2.86e-10	7.31e-08
MIMAT0018934	-9.94628	-1.44269e+08	2.41421	6.94e-10	1.63e-07
MIMAT0000728	8.6089	8.6224	6.09143	1.61e-09	3.48e-07
MIMAT0004482	-8.35134	-8.36894	6.58034	2.5e-09	5.03e-07
MIMAT0002820	-8.2266	-8.25722	4.54419	4.03e-09	7.56e-07
MIMAT0001635	8.68364	8.75818	5.99715	6e-09	1.05e-06
MIMAT0004284	8.59077	8.6653	5.86944	8e-09	1.32e-06
MIMAT0000102	9.08278	9.29851	3.62593	8.91e-09	1.39e-06
MIMAT0000461	-7.86795	-7.87653	6.82573	1.04e-08	1.54e-06
MIMAT0004514	-7.64064	-7.67174	3.07269	1.21e-08	1.71e-06
MIMAT0002881_1	8.92687	9.14255	3.6479	1.47e-08	1.97e-06
MIMAT0002881	8.88777	9.10344	3.65004	1.66e-08	2.12e-06
MIMAT0022717	10.9142	1.44269e+08	3.92339	1.74e-08	2.13e-06
MIMAT0004566	10.7362	1.44269e+08	2.42379	1.93e-08	2.26e-06
MIMAT0000724	7.73657	7.75661	7.80203	2.13e-08	2.4e-06
MIMAT0001341	-7.59025	-7.59309	6.03473	2.34e-08	2.44e-06
MIMAT0000268	7.6503	7.65701	6.79272	2.34e-08	2.44e-06
MIMAT0004503	-7.36642	-7.53761	0.701634	2.77e-08	2.78e-06
MIMAT0004512	-7.62387	-8.01857	0.404704	3.61e-08	3.5e-06
MIMAT0000102_1	8.11488	8.22475	3.61078	4.53e-08	4.25e-06
MIMAT0015015	-7.5449	-7.92888	0.302914	5.07e-08	4.6e-06
MIMAT0017999	-8.75956	-1.44269e+08	-0.455806	5.27e-08	4.63e-06
MIMAT0000100_1	-7.11359	-7.13405	3.67726	7.65e-08	6.52e-06
MIMAT0010195	-7.03732	-7.10643	2.22656	8.69e-08	7.19e-06
MIMAT0026620	10.2439	1.44269e+08	2.79735	9.41e-08	7.26e-06
MIMAT0003882	7.42515	7.4578	4.18454	9.54e-08	7.26e-06
MIMAT0025455	-7.40259	-7.79722	1.04095	9.55e-08	7.26e-06
MIMAT0000454	7.13992	7.14831	7.28794	1.07e-07	7.9e-06
MIMAT0002878	7.45364	7.50042	4.91529	1.34e-07	9.7e-06
MIMAT0004658	-8.70674	-1.44269e+08	-0.776094	1.48e-07	1.04e-05
MIMAT0002881_2	7.47899	7.55518	3.63274	1.68e-07	1.15e-05
MIMAT0005941	9.86468	1.44269e+08	1.22099	2.15e-07	1.44e-05
MIMAT0000416	6.77856	6.78265	6.73252	3.05e-07	2e-05
MIMAT0005903	9.83778	1.44269e+08	2.5598	3.17e-07	2.03e-05
MIMAT0000416_1	6.75918	6.76347	6.64774	3.28e-07	2.03e-05
MIMAT0018961	9.95185	1.44269e+08	5.76978	3.32e-07	2.03e-05
MIMAT0018352	-8.79268	-1.44269e+08	-1.08906	3.54e-07	2.12e-05
MIMAT0004779	9.75317	1.44269e+08	2.16258	3.91e-07	2.29e-05
MIMAT0000275_1	6.45098	6.45176	9.56943	4.2e-07	2.41e-05
MIMAT0000100	-6.52229	-6.53543	3.71461	4.72e-07	2.66e-05
MIMAT0009201	-8.05053	-144269485	-0.85127	1.21e-06	6.65e-05
MIMAT0004975	6.61347	6.64639	4.93814	1.23e-06	6.65e-05
MIMAT0005789	9.29837	1.44269e+08	1.71479	1.43e-06	7.56e-05
MIMAT0019951	9.34346	1.44269e+08	3.13872	1.46e-06	7.59e-05
MIMAT0016895	-6.04709	-6.1766	0.166128	1.82e-06	9.32e-05
MIMAT0000062_1	-5.66436	-5.66438	14.0747	1.89e-06	9.48e-05
MIMAT0000646	-5.82341	-5.82345	11.5963	1.94e-06	9.58e-05
MIMAT0000062	-5.64868	-5.6487	14.0655	1.99e-06	9.67e-05
MIMAT0027514	9.15605	1.44269e+08	1.43232	2.03e-06	9.67e-05
MIMAT0002880	6.53795	6.58331	4.74801	2.11e-06	9.89e-05
MIMAT0000275	5.92261	5.92312	9.63644	2.17e-06	0.00010006
MIMAT0025463	9.06428	144269486	0.930548	2.29e-06	0.000102216
MIMAT0000062_2	-5.60766	-5.60768	14.0699	2.29e-06	0.000102216
MIMAT0004481_1	-6.05336	-6.05661	6.33295	2.48e-06	0.000108953
MIMAT0025470	9.15442	1.44269e+08	3.30986	2.63e-06	0.000111974
MIMAT0022842	-5.85389	-5.9339	1.04446	2.63e-06	0.000111974
MIMAT0000442	-5.76679	-5.76706	10.6664	2.83e-06	0.000118759
MIMAT0000442_2	-5.7293	-5.72956	10.6618	3.19e-06	0.000131943
MIMAT0005929	9.02372	144269486	1.77389	3.25e-06	0.000132361
MIMAT0000442_1	-5.71869	-5.71896	10.6615	3.3e-06	0.000132575
MIMAT0004481	-5.94876	-5.9517	6.50535	3.38e-06	0.000133796
MIMAT0005881	5.89864	5.90272	6.82966	4.39e-06	0.000171188
MIMAT0030019	8.87784	1.44269e+08	1.24089	4.44e-06	0.000171188
MIMAT0004778	6.90329	7.11761	1.81551	4.88e-06	0.000185349
MIMAT0004779_1	6.91393	7.12827	2.18322	5.03e-06	0.000188686
MIMAT0004504	-5.72925	-5.80648	1.22356	5.39e-06	0.000199672
MIMAT0001545	-5.75545	-5.75651	6.56989	5.92e-06	0.000214314
MIMAT0001545_1	-5.75409	-5.75513	6.60433	5.94e-06	0.000214314
MIMAT0004601	5.77971	5.78279	5.92768	6.09e-06	0.00021595
MIMAT0004562	-7.00825	-144269484	0.893317	6.19e-06	0.00021595
MIMAT0002806	6.74252	6.9566	1.03652	6.29e-06	0.00021595
MIMAT0015036	-5.55075	-5.58177	1.42876	6.3e-06	0.00021595
MIMAT0003389	-5.72516	-5.72605	6.70744	6.44e-06	0.000218184
MIMAT0019930	8.77615	1.44269e+08	1.88966	6.6e-06	0.000220974
MIMAT0000415	-5.13473	-5.13474	15.6149	8.21e-06	0.000270518
MIMAT0019219	-6.18947	-6.58145	-0.32705	8.27e-06	0.000270518
MIMAT0018204	5.7569	5.78396	2.98774	8.77e-06	0.000283573
MIMAT0000226	-5.57136	-5.57312	7.65884	9.12e-06	0.000291428
MIMAT0006790	8.61686	1.44269e+08	2.51741	1.11e-05	0.000349675
MIMAT0000226_1	-5.49161	-5.49377	7.20694	1.25e-05	0.00039014
MIMAT0021128	-7.44767	-1.44269e+08	-1.11623	1.29e-05	0.000394005
MIMAT0019738	8.53531	1.44269e+08	1.69549	1.29e-05	0.000394005
MIMAT0000462	6.46994	6.68224	1.23731	1.55e-05	0.000465669
MIMAT0003266	5.43694	5.43908	7.17069	1.56e-05	0.000465669
MIMAT0022259	6.16152	6.27271	3.47535	1.6e-05	0.000474347
MIMAT0003340	-6.10126	-6.46673	-0.558004	1.64e-05	0.000480273
MIMAT0015014	-7.46083	-1.44269e+08	-1.28251	1.94e-05	0.000562647
MIMAT0000098	-4.85453	-4.85453	15.8211	2.04e-05	0.000586328
MIMAT0005923	5.64993	5.68254	5.60051	2.08e-05	0.0005897
MIMAT0000681	-5.13823	-5.15929	1.91522	2.2e-05	0.000617961
MIMAT0019928	-6.86438	-1.44269e+08	-0.784106	2.81e-05	0.000781842
MIMAT0004508	5.21605	5.21827	6.4428	3.12e-05	0.000861726
MIMAT0026612	8.14508	1.44269e+08	0.24049	3.18e-05	0.000868356
MIMAT0019928_1	-6.74419	-1.44269e+08	-0.680274	3.26e-05	0.000883069
MIMAT0018926	6.24201	6.4539	1.65524	3.35e-05	0.000898766
MIMAT0000096	-5.00076	-5.00091	10.0701	3.43e-05	0.000910706
MIMAT0027637	8.07094	144269485	2.12304	4.77e-05	0.00125308
MIMAT0004567	4.91849	4.9187	9.44909	4.86e-05	0.00126678
MIMAT0022694	8.01381	144269485	-0.0757875	5.18e-05	0.00133765
MIMAT0000686	-5.00311	-5.0035	6.95683	5.32e-05	0.00136006
MIMAT0013517	5.22735	5.24963	5.4132	5.5e-05	0.00139455
MIMAT0000738	5.6178	5.72611	1.4478	5.58e-05	0.00140026
MIMAT0019747	5.03367	5.04166	4.17782	5.98e-05	0.00148859
MIMAT0019912	-6.81886	-1.44269e+08	-1.19755	7.25e-05	0.00178925
MIMAT0004977	8.00609	144269485	-0.455678	7.55e-05	0.0018469
MIMAT0003385	4.86975	4.87058	7.25593	7.72e-05	0.00187123
MIMAT0018969	7.79862	1.44269e+08	0.342876	7.82e-05	0.0018811
MIMAT0004987	8.20889	1.44269e+08	-0.892415	8.39e-05	0.00199953
MIMAT0004615	-4.82203	-4.82355	7.25708	8.73e-05	0.00206414
MIMAT0000242	4.76457	4.76619	8.10248	9.63e-05	0.00224501
MIMAT0000242_1	4.76467	4.76629	8.08774	9.66e-05	0.00224501
MIMAT0017984	-4.56892	-4.60777	0.754773	0.000103567	0.00238799
MIMAT0004552	4.78487	4.78651	6.77225	0.000105621	0.00241554
MIMAT0017392	-4.59933	-4.61534	1.61653	0.000108908	0.00247063
MIMAT0020958	5.50658	5.6158	-0.451498	0.00011046	0.0024858
MIMAT0000258	-4.63054	-4.64965	2.73196	0.000117156	0.00261555
MIMAT0003214	7.64598	1.44269e+08	0.158357	0.00012027	0.00266393
MIMAT0000255	-4.72155	-4.72235	5.26273	0.000122064	0.00268254
MIMAT0023701	-7.33054	-1.44269e+08	-1.76026	0.000128184	0.0027952
MIMAT0026618	7.78286	1.44269e+08	-0.444047	0.000129764	0.00280789
MIMAT0005922	7.59873	1.44269e+08	0.108276	0.000141021	0.00302819
MIMAT0000430	-4.67487	-4.7547	1.63667	0.00014822	0.00313761
MIMAT0005908	5.23041	5.34005	0.865394	0.000148348	0.00313761
MIMAT0004516_1	7.71577	1.44269e+08	-0.455863	0.000149529	0.00313899
MIMAT0000414	-4.267	-4.26701	14.7336	0.000153867	0.00320612
MIMAT0000065	-4.43432	-4.4344	10.8174	0.000170521	0.00352703
MIMAT0015079	7.69359	1.44269e+08	-0.515781	0.000173657	0.00355056
MIMAT0026741	5.63029	5.84215	1.32552	0.000175022	0.00355056
MIMAT0005887	-5.12977	-5.50573	1.68716	0.000175445	0.00355056
MIMAT0002877_1	7.63588	1.44269e+08	-0.447968	0.000186355	0.00373356
MIMAT0015041	4.6002	4.60344	6.41429	0.000188023	0.00373356
MIMAT0018925	7.47853	1.44269e+08	0.199912	0.00018847	0.00373356
MIMAT0004953	7.46161	1.44269e+08	1.07222	0.000195767	0.00383926
MIMAT0002859	7.46129	1.44269e+08	0.178762	0.000196535	0.00383926
MIMAT0004484	-4.43601	-4.43631	9.23636	0.000207162	0.00401894
MIMAT0000429	4.80048	4.84304	2.68371	0.00021512	0.00414475
MIMAT0000067	-4.17348	-4.17349	14.3207	0.000216814	0.00414897
MIMAT0000771	-6.06891	-6.76374	-1.43007	0.000241301	0.00458636
MIMAT0002877	7.47895	1.44269e+08	-0.425243	0.000265181	0.00500392
MIMAT0000067_1	-4.09899	-4.099	14.4069	0.000266829	0.00500392
MIMAT0000427_1	4.73717	4.79185	1.48141	0.000277472	0.00516906
MIMAT0019207	-4.40759	-4.44086	-0.374961	0.000280111	0.0051839
MIMAT0007883	5.41032	5.62149	0.78471	0.000283577	0.00521374
MIMAT0000084	-4.24678	-4.24688	10.4114	0.000308952	0.00564338
MIMAT0004925	7.26338	1.44269e+08	1.24976	0.000327752	0.00594817
MIMAT0004605	4.52302	4.55371	2.19942	0.000338516	0.00610414
MIMAT0003260	4.30786	4.31353	3.27062	0.000346481	0.00620796
MIMAT0000427	4.62323	4.6771	1.50953	0.000384255	0.00684121
MIMAT0015077	7.26081	1.44269e+08	-0.282683	0.000388377	0.00684283
MIMAT0000089	-4.29618	-4.29656	7.12297	0.000389212	0.00684283
MIMAT0027422	7.15451	1.44269e+08	0.175895	0.000401142	0.00700877
MIMAT0004487	-4.15399	-4.16733	2.18463	0.000416964	0.00724025
MIMAT0004764	7.28226	1.44269e+08	-0.521587	0.00043724	0.00754573
MIMAT0004768	-6.52711	-1.44269e+08	-1.68939	0.000455235	0.00778371
MIMAT0002874	-4.21494	-4.21508	7.74969	0.000456563	0.00778371
MIMAT0018353	4.50291	4.55723	1.26962	0.000503495	0.00853212
MIMAT0004516	7.39462	1.44269e+08	-0.956524	0.000547081	0.0092152
MIMAT0015044	-6.71063	-1.44269e+08	-1.8632	0.000574169	0.00961391
MIMAT0030412	-6.07246	-144269483	-1.40228	0.000583314	0.00968756
MIMAT0000435	3.94295	3.94298	11.8799	0.000588898	0.00968756
MIMAT0004749	-4.00412	-4.00414	10.5064	0.000588899	0.00968756

## Sheet: iNSC30 - GIC30_smRNA_DEList_glm
	logFC	unshrunk.logFC	logCPM	PValue	FDR
MIMAT0002173	14.7094	14.734	10.0913	4.66e-18	1.31e-14		45	Up-regulated
MIMAT0004284	16.4308	1.44269e+08	5.86944	1.93e-14	2.72e-11		46	Down-regulated
MIMAT0004761	12.2154	12.2441	7.65267	6.83e-14	6.4e-11
MIMAT0000442_2	-9.40263	-9.40897	10.6618	2.6e-11	1.64e-08
MIMAT0000063	-8.77829	-8.77837	14.654	2.92e-11	1.64e-08
MIMAT0018934	-12.3634	-1.44269e+08	2.41421	4.34e-11	2.03e-08
MIMAT0000442	-9.02347	-9.02831	10.6664	8.57e-11	3.45e-08
MIMAT0000442_1	-8.96118	-8.96587	10.6615	1.05e-10	3.7e-08
MIMAT0025470	10.4535	10.5757	3.30986	1.65e-10	5.15e-08
MIMAT0022721	9.54512	9.58243	7.47286	4.42e-10	1.24e-07
MIMAT0000724	9.32077	9.35364	7.80203	5.17e-10	1.32e-07
MIMAT0004482	-8.88133	-8.89453	6.58034	5.86e-10	1.37e-07
MIMAT0000461	-8.89656	-8.93399	6.82573	1.2e-09	2.57e-07
MIMAT0003250	8.7312	8.74007	6.09125	1.28e-09	2.57e-07
MIMAT0025455	-10.8313	-1.44269e+08	1.04095	3.75e-09	7.03e-07
MIMAT0006790	12.0295	144269489	2.51741	7.04e-09	1.2e-06
MIMAT0002820	-8.65526	-8.74675	4.54419	7.25e-09	1.2e-06
MIMAT0000275_1	7.56996	7.57087	9.56943	1.24e-08	1.93e-06
MIMAT0005899	8.26541	8.29106	6.86029	1.33e-08	1.94e-06
MIMAT0022717	8.2755	8.30821	3.92339	1.38e-08	1.94e-06
MIMAT0000275	7.50224	7.50305	9.63644	1.5e-08	2.01e-06
MIMAT0000441_2	-6.86868	-6.8687	15.0864	2.19e-08	2.8e-06
MIMAT0000441	-6.84698	-6.847	15.0871	2.37e-08	2.85e-06
MIMAT0000441_1	-6.83926	-6.83928	15.0862	2.43e-08	2.85e-06
MIMAT0005924	11.4095	1.44269e+08	3.95279	7.35e-08	8.27e-06
MIMAT0018961	11.1486	1.44269e+08	5.76978	1.7e-07	1.83e-05
MIMAT0010195	-7.9308	-8.19481	2.22656	2.36e-07	2.46e-05
MIMAT0000098	-6.11304	-6.11305	15.8211	2.58e-07	2.59e-05
MIMAT0005887	-9.35421	-1.44269e+08	1.68716	6.32e-07	6.13e-05
MIMAT0000086	-6.23941	-6.2401	10.2809	6.94e-07	6.5e-05
MIMAT0004565	7.66481	7.78385	1.88947	8.11e-07	7.36e-05
MIMAT0004925	10.2431	1.44269e+08	1.24976	1.31e-06	0.000115541
MIMAT0019930	-9.12004	-1.44269e+08	1.88966	1.4e-06	0.000117522
MIMAT0000416_1	6.27351	6.27501	6.64774	1.42e-06	0.000117522
MIMAT0004559	-6.54932	-6.58653	4.76201	1.6e-06	0.000128201
MIMAT0004615	-6.15469	-6.15597	7.25708	1.73e-06	0.000135255
MIMAT0026472	-6.13146	-6.1381	5.8851	2.43e-06	0.000184883
MIMAT0022259	10.119	1.44269e+08	3.47535	2.7e-06	0.000196256
MIMAT0000427_1	10.0188	144269487	1.48141	2.72e-06	0.000196256
MIMAT0018204	6.57337	6.61282	2.98774	2.87e-06	0.000202165
MIMAT0000416	5.98405	5.98522	6.73252	3.28e-06	0.000225108
MIMAT0004566	7.20939	7.33082	2.42379	3.51e-06	0.000235144
MIMAT0002821	-5.81126	-5.81288	8.38754	4.02e-06	0.0002628
MIMAT0027475	10.0455	144269487	-0.537309	4.72e-06	0.000302004
MIMAT0004503	-8.51974	-1.44269e+08	0.701634	5.83e-06	0.000364419
MIMAT0004562	-5.54858	-5.56782	0.893317	6.03e-06	0.000368817
MIMAT0017392	-6.78827	-7.05623	1.61653	7.29e-06	0.000436367
MIMAT0004953	9.56514	1.44269e+08	1.07222	9.14e-06	0.000535924
MIMAT0005929	6.76028	6.8814	1.77389	1.2e-05	0.000688399
MIMAT0005908	9.40548	1.44269e+08	0.865394	1.4e-05	0.000788048
MIMAT0004779_1	9.43849	1.44269e+08	2.18322	1.61e-05	0.000870914
MIMAT0004511	-5.80668	-5.87052	2.67675	1.61e-05	0.000870914
MIMAT0000427	6.58292	6.70388	1.50953	1.91e-05	0.00101242
MIMAT0017984	-6.3838	-6.64651	0.754773	1.98e-05	0.00103024
MIMAT0004591_1	9.36997	1.44269e+08	2.88461	2.02e-05	0.00103064
MIMAT0004512	-6.26669	-6.5292	0.404704	2.83e-05	0.00142025
MIMAT0003247	-5.35125	-5.37703	3.13137	2.93e-05	0.00144417
MIMAT0005795	6.32975	6.44822	0.535351	3.21e-05	0.00155751
MIMAT0000100	-5.31179	-5.33562	3.71461	3.44e-05	0.00163969
MIMAT0017999	-8.09401	-144269485	-0.455806	3.56e-05	0.00166985
MIMAT0000261	4.85963	4.85965	12.4105	3.66e-05	0.00166985
MIMAT0000683	5.32695	5.33644	7.28652	3.68e-05	0.00166985
MIMAT0000430_1	-5.16246	-5.18281	3.22678	4.31e-05	0.00192287
MIMAT0002880	5.34772	5.36213	4.74801	5.17e-05	0.0022718
MIMAT0019805	-7.7594	-1.44269e+08	1.19132	5.72e-05	0.00247555
MIMAT0000078	-4.80895	-4.80901	10.1637	6.06e-05	0.0025728
MIMAT0004497	-4.97245	-4.97386	5.68795	6.18e-05	0.0025728
MIMAT0004567	4.83917	4.83932	9.44909	6.22e-05	0.0025728
MIMAT0000423_1	-4.66458	-4.66465	12.1041	7.08e-05	0.00288766
MIMAT0001536	-5.97926	-6.24548	1.03422	7.39e-05	0.00297116
MIMAT0005922	8.76086	1.44269e+08	0.108276	7.83e-05	0.00310051
MIMAT0000423	-4.62382	-4.62389	12.1563	7.97e-05	0.00311459
MIMAT0002883	5.01982	5.0279	4.31781	8.65e-05	0.00329308
MIMAT0000682	-4.91106	-4.93101	3.30255	8.66e-05	0.00329308
MIMAT0000064	-4.51237	-4.51239	12.8595	0.000101248	0.00379748
MIMAT0031181	-4.82412	-4.84266	2.50843	0.00010657	0.0039445
MIMAT0019747	5.42933	5.46992	4.17782	0.000110723	0.004045
MIMAT0005941	8.63404	1.44269e+08	1.22099	0.000119266	0.00430122
MIMAT0006764_1	5.13468	5.16644	2.94436	0.000129082	0.00458904
MIMAT0003214	8.57951	1.44269e+08	0.158357	0.00013051	0.00458904
MIMAT0021080	8.54155	1.44269e+08	0.117769	0.000138229	0.00478461
MIMAT0019738	5.1959	5.23305	1.69549	0.000139473	0.00478461
MIMAT0000681	-5.0175	-5.08078	1.91522	0.00015266	0.00517389
MIMAT0002883_1	4.73054	4.73713	4.32937	0.000184292	0.00617159
MIMAT0015015	-5.62652	-5.89155	0.302914	0.000198866	0.0065813
MIMAT0005798	-7.79556	-1.44269e+08	-1.13481	0.000207364	0.00678275
MIMAT0027479	4.57086	4.57865	3.03678	0.000216552	0.00700186
MIMAT0004481	-4.49953	-4.50054	6.50535	0.000230621	0.00737203
MIMAT0005903	5.23029	5.28999	2.5598	0.000267167	0.00844427
MIMAT0019951	4.50527	4.51292	3.13872	0.000279867	0.0087474
MIMAT0004481_1	-4.41265	-4.4138	6.33295	0.00029537	0.00913051

## Sheet: iNSC31 - GIC31_smRNA_DEList_glm
	logFC	unshrunk.logFC	logCPM	PValue	FDR
MIMAT0000724	11.161	11.2204	7.80203	2.78e-12	7.52e-09		84	Up-regulated
MIMAT0000063	-9.25858	-9.25886	14.654	5.34e-12	7.52e-09		135	Down-regulated
MIMAT0022721	10.0517	10.0833	7.47286	3.87e-11	3.63e-08
MIMAT0004920	13.0758	144269490	4.76357	1.02e-10	7.17e-08
MIMAT0005924	12.8915	1.44269e+08	3.95279	1.41e-10	7.93e-08
MIMAT0018934	-11.7561	-1.44269e+08	2.41421	4.38e-10	1.76e-07
MIMAT0000683	8.89594	8.90321	7.28652	5.23e-10	1.76e-07
MIMAT0000266	9.79413	9.89046	5.55946	5.56e-10	1.76e-07
MIMAT0001627	8.70776	8.71501	9.0828	5.62e-10	1.76e-07
MIMAT0000086	-8.28314	-8.2839	10.2809	9.31e-10	2.62e-07
MIMAT0003250	10.0169	10.2013	6.09125	1.16e-09	2.97e-07
MIMAT0002814	8.27271	8.27645	9.20677	1.81e-09	4.24e-07
MIMAT0000442	-7.93111	-7.93205	10.6664	2.6e-09	5.38e-07
MIMAT0002813	7.95072	7.9519	10.3814	2.86e-09	5.38e-07
MIMAT0000442_2	-7.90136	-7.90228	10.6618	2.87e-09	5.38e-07
MIMAT0000442_1	-7.83583	-7.83672	10.6615	3.55e-09	6.23e-07
MIMAT0000721	8.45721	8.48388	6.92775	4.44e-09	7.34e-07
MIMAT0026558	11.5858	1.44269e+08	3.55004	6.44e-09	9.45e-07
MIMAT0004482	-8.323	-8.34963	6.58034	6.68e-09	9.45e-07
MIMAT0004511	-8.46144	-8.55961	2.67675	6.72e-09	9.45e-07
MIMAT0000447	7.71101	7.71286	9.75977	7.98e-09	9.87e-07
MIMAT0001080	-7.85202	-7.85315	7.84071	8.06e-09	9.87e-07
MIMAT0003180	8.44772	8.48688	6.51333	8.07e-09	9.87e-07
MIMAT0000736	7.62369	7.62474	10.1737	8.76e-09	1.03e-06
MIMAT0004690	8.61714	8.68292	5.97501	9.74e-09	1.1e-06
MIMAT0004921	7.84902	7.85648	7.69369	1.32e-08	1.38e-06
MIMAT0003161	7.73884	7.74308	8.21367	1.36e-08	1.38e-06
MIMAT0000737	7.52316	7.5248	9.89989	1.37e-08	1.38e-06
MIMAT0004954	7.39539	7.39654	10.4693	1.69e-08	1.64e-06
MIMAT0003330	7.57636	7.57905	8.6834	1.77e-08	1.64e-06
MIMAT0004814	7.56314	7.56738	9.00944	1.81e-08	1.64e-06
MIMAT0022838	11.2768	1.44269e+08	5.30708	2.27e-08	1.99e-06
MIMAT0022697	7.61452	7.62249	8.10918	2.47e-08	2.11e-06
MIMAT0000717	10.9846	1.44269e+08	2.19744	3.03e-08	2.5e-06
MIMAT0000755	7.22247	7.22361	9.97634	3.4e-08	2.73e-06
MIMAT0019738	10.8716	1.44269e+08	1.69549	3.81e-08	2.98e-06
MIMAT0018961	11.0041	144269488	5.76978	4.86e-08	3.63e-06
MIMAT0026555_1	10.8735	1.44269e+08	3.19482	4.91e-08	3.63e-06
MIMAT0005923	7.58208	7.59497	5.60051	5.04e-08	3.63e-06
MIMAT0004566	10.8157	1.44269e+08	2.42379	5.22e-08	3.67e-06
MIMAT0015050	7.28454	7.28956	7.99025	6.02e-08	4.13e-06
MIMAT0000415	-6.52912	-6.52913	15.6149	6.22e-08	4.13e-06
MIMAT0000446	6.75875	6.75887	12.9069	6.31e-08	4.13e-06
MIMAT0015036	10.6512	1.44269e+08	1.42876	6.74e-08	4.31e-06
MIMAT0002817	7.11462	7.11842	8.63634	8.21e-08	5.13e-06
MIMAT0000268	7.21298	7.21656	6.79272	8.54e-08	5.22e-06
MIMAT0005899	7.32463	7.34115	6.86029	1.01e-07	5.95e-06
MIMAT0004757	7.48971	7.51261	6.38552	1.02e-07	5.95e-06
MIMAT0000722	6.63283	6.63298	12.5668	1.07e-07	6.12e-06
MIMAT0002821	-6.95173	-6.95271	8.38754	1.15e-07	6.49e-06
MIMAT0026480	-9.80453	-1.44269e+08	0.670171	1.2e-07	6.61e-06
MIMAT0004559	-7.12805	-7.14074	4.76201	1.3e-07	7e-06
MIMAT0000754	7.7598	7.8149	5.4264	1.32e-07	7e-06
MIMAT0004696	8.46528	8.64352	4.38832	1.35e-07	7.05e-06
MIMAT0001639	6.53924	6.53935	12.5184	1.47e-07	7.54e-06
MIMAT0000258	-7.12861	-7.1802	2.73196	1.8e-07	8.89e-06
MIMAT0000733	6.58164	6.58197	11.2592	1.82e-07	8.89e-06
MIMAT0001625	7.6497	7.70477	5.48344	1.83e-07	8.89e-06
MIMAT0004813	6.98696	6.9955	7.48353	2.12e-07	9.96e-06
MIMAT0019805	-9.69508	-1.44269e+08	1.19132	2.12e-07	9.96e-06
MIMAT0001621	7.18952	7.21379	6.14286	2.31e-07	1.06e-05
MIMAT0000439	-7.00554	-7.0362	3.28241	2.34e-07	1.06e-05
MIMAT0026614	10.3597	1.44269e+08	3.25544	2.37e-07	1.06e-05
MIMAT0004481	-6.84615	-6.85182	6.50535	2.51e-07	1.1e-05
MIMAT0000096	-6.53715	-6.53766	10.0701	2.79e-07	1.21e-05
MIMAT0019930	-9.6793	-1.44269e+08	1.88966	3.03e-07	1.29e-05
MIMAT0000062_1	-6.19668	-6.19671	14.0747	3.07e-07	1.29e-05
MIMAT0004508	6.81532	6.82105	6.4428	3.21e-07	1.33e-05
MIMAT0000062	-6.17061	-6.17064	14.0655	3.37e-07	1.37e-05
MIMAT0000062_2	-6.14717	-6.1472	14.0699	3.65e-07	1.47e-05
MIMAT0026559	7.41807	7.47733	4.97896	3.87e-07	1.53e-05
MIMAT0004503	-9.4407	-1.44269e+08	0.701634	4e-07	1.56e-05
MIMAT0001638	6.73514	6.7443	7.72252	4.26e-07	1.64e-05
MIMAT0000681	-7.78432	-8.05413	1.91522	4.39e-07	1.67e-05
MIMAT0002171	7.35468	7.41741	5.34527	4.69e-07	1.76e-05
MIMAT0004481_1	-6.61779	-6.62304	6.33295	5.04e-07	1.85e-05
MIMAT0002176	6.66091	6.66884	7.6951	5.12e-07	1.85e-05
MIMAT0000684	7.8319	8.01539	2.50138	5.14e-07	1.85e-05
MIMAT0002175	6.50463	6.50664	8.37033	5.24e-07	1.87e-05
MIMAT0002816	6.50566	6.512	8.64537	5.54e-07	1.95e-05
MIMAT0002890	10.1729	1.44269e+08	4.64557	5.88e-07	2.04e-05
MIMAT0004761	6.68627	6.69893	7.65267	6.11e-07	2.1e-05
MIMAT0005789	6.95494	7.01997	1.71479	6.8e-07	2.31e-05
MIMAT0026555	7.75226	7.93072	3.16746	7.28e-07	2.44e-05
MIMAT0004504	-7.10229	-7.23971	1.22356	7.69e-07	2.55e-05
MIMAT0002881_2	6.48711	6.49957	3.63274	8.1e-07	2.62e-05
MIMAT0000441_1	-5.84078	-5.84078	15.0862	8.11e-07	2.62e-05
MIMAT0000441_2	-5.83506	-5.83507	15.0864	8.27e-07	2.64e-05
MIMAT0000441	-5.8183	-5.81831	15.0871	8.77e-07	2.77e-05
MIMAT0001629	6.64621	6.66902	6.19296	1.05e-06	3.28e-05
MIMAT0000646	-5.98684	-5.98693	11.5963	1.14e-06	3.54e-05
MIMAT0010195	-7.00762	-7.14992	2.22656	1.32e-06	4.04e-05
MIMAT0002881_1	6.31694	6.32837	3.6479	1.35e-06	4.08e-05
MIMAT0002881	6.32199	6.3337	3.65004	1.43e-06	4.28e-05
MIMAT0026483	6.81671	6.85599	4.67104	1.45e-06	4.28e-05
MIMAT0000439_1	-6.27442	-6.29219	3.35889	1.56e-06	4.55e-05
MIMAT0003163	7.13544	7.22747	4.02162	1.57e-06	4.55e-05
MIMAT0004512	-8.95596	-1.44269e+08	0.404704	1.88e-06	5.4e-05
MIMAT0002178	7.50577	7.6892	3.99299	1.97e-06	5.6e-05
MIMAT0000715	6.23482	6.2441	5.27479	2.14e-06	6.03e-05
MIMAT0000461	-6.18503	-6.19767	6.82573	2.26e-06	6.29e-05
MIMAT0022713	9.61655	1.44269e+08	3.51571	2.29e-06	6.33e-05
MIMAT0009201	-9.40284	-1.44269e+08	-0.85127	2.44e-06	6.67e-05
MIMAT0026557	6.40096	6.42235	5.31822	2.66e-06	7.12e-05
MIMAT0022717	7.39671	7.58006	3.92339	2.66e-06	7.12e-05
MIMAT0019951	6.82335	6.91869	3.13872	2.83e-06	7.52e-05
MIMAT0022842	-7.09485	-7.35705	1.04446	2.96e-06	7.78e-05
MIMAT0002173	5.8153	5.81747	10.0913	3.08e-06	8.03e-05
MIMAT0022694	9.34161	1.44269e+08	-0.0757875	3.53e-06	9.12e-05
MIMAT0001629_1	6.20902	6.22791	6.19163	3.64e-06	9.3e-05
MIMAT0004604	6.59276	6.64762	5.22902	4.26e-06	0.000107975
MIMAT0000734	6.16836	6.18975	4.59726	5.32e-06	0.000133682
MIMAT0003329	5.68801	5.6902	9.14571	5.57e-06	0.000138719
MIMAT0018204	6.00869	6.04261	2.98774	6.28e-06	0.000155002
MIMAT0000226	-5.7482	-5.75393	7.65884	6.39e-06	0.000156129
MIMAT0000729_1	7.09473	7.2725	3.8674	6.44e-06	0.000156129
MIMAT0002878	5.81256	5.81735	4.91529	6.64e-06	0.000159643
MIMAT0004484	-5.56039	-5.56104	9.23636	7.23e-06	0.000172342
MIMAT0000718	6.24585	6.31058	2.36773	7.37e-06	0.000174216
MIMAT0000100	-5.78925	-5.80816	3.71461	7.49e-06	0.000175629
MIMAT0002820	-6.06372	-6.10205	4.54419	7.64e-06	0.000177519
MIMAT0000416_1	5.66098	5.663	6.64774	8.6e-06	0.000198302
MIMAT0000414	-5.16611	-5.16612	14.7336	8.81e-06	0.000201473
MIMAT0000416	5.63466	5.63657	6.73252	9.14e-06	0.000207292
MIMAT0002818	9.00405	144269486	2.04367	1.06e-05	0.000238115
MIMAT0025455	-6.67115	-6.93947	1.04095	1.12e-05	0.000251013
MIMAT0000728	5.54076	5.54156	6.09143	1.18e-05	0.00026152
MIMAT0004778	5.56462	5.59046	1.81551	1.49e-05	0.00032768
MIMAT0000067_1	-4.97506	-4.97507	14.4069	1.77e-05	0.000386604
MIMAT0000067	-4.96989	-4.96991	14.3207	1.83e-05	0.000393674
MIMAT0004601	5.39557	5.39718	5.92768	1.83e-05	0.000393674
MIMAT0005929	8.7644	1.44269e+08	1.77389	1.95e-05	0.000416151
MIMAT0000273	-5.29343	-5.30191	3.13238	2.06e-05	0.000435084
MIMAT0026607	8.72545	1.44269e+08	1.87206	2.22e-05	0.000466325
MIMAT0004514	-5.39512	-5.42444	3.07269	2.4e-05	0.000499689
MIMAT0000448	5.74354	5.77565	5.26839	2.59e-05	0.000536424
MIMAT0003247	-5.1829	-5.19048	3.13137	2.64e-05	0.000542491
MIMAT0000064	-4.91544	-4.91546	12.8595	2.84e-05	0.000578266
MIMAT0000089	-5.21113	-5.21232	7.12297	2.9e-05	0.00058775
MIMAT0004763	-5.34456	-5.37679	2.65313	3.21e-05	0.000644494
MIMAT0019072	8.6281	1.44269e+08	-0.252494	3.33e-05	0.000659956
MIMAT0003332	5.7409	5.79032	4.90028	3.33e-05	0.000659956
MIMAT0004487	-5.246	-5.27059	2.18463	3.47e-05	0.000683198
MIMAT0005908	6.30505	6.4869	0.865394	3.61e-05	0.000705552
MIMAT0000720	6.04387	6.13876	4.32524	3.76e-05	0.000727489
MIMAT0004606	5.60863	5.64064	5.80551	3.78e-05	0.000727489
MIMAT0000100_1	-5.141	-5.15261	3.67726	4.3e-05	0.000822252
MIMAT0001341	-5.10384	-5.10653	6.03473	4.45e-05	0.000846093
MIMAT0003879	5.19478	5.20162	6.41528	4.61e-05	0.000869398
MIMAT0000729	5.72098	5.78297	3.86665	4.69e-05	0.000879923
MIMAT0000687	5.74497	5.80956	4.32518	4.74e-05	0.000883305
MIMAT0001630	8.33937	1.44269e+08	0.60829	5.03e-05	0.000930278
MIMAT0000065	-4.81939	-4.8196	10.8174	5.35e-05	0.00098289
MIMAT0000735	8.37993	1.44269e+08	1.78446	5.55e-05	0.00101116
MIMAT0022259	5.82932	5.92387	3.47535	5.57e-05	0.00101116
MIMAT0000098	-4.50832	-4.50832	15.8211	6.12e-05	0.0011037
MIMAT0025849	6.12829	6.30576	1.07554	6.54e-05	0.00117174
MIMAT0005944	-5.7216	-5.85091	-0.272979	6.58e-05	0.00117174
MIMAT0000758	-4.91797	-4.91834	7.18578	6.7e-05	0.00118542
MIMAT0005824	-5.0306	-5.08059	0.538529	7.33e-05	0.00128834
MIMAT0004975	4.92982	4.93266	4.93814	7.73e-05	0.00135045
MIMAT0018980	8.1975	1.44269e+08	0.00585138	7.79e-05	0.00135212
MIMAT0018926_1	5.33116	5.39285	1.74158	0.0001	0.00172562
MIMAT0003284	-4.85634	-4.89462	-0.0357311	0.000104811	0.00179776
MIMAT0006764_1	5.01848	5.05059	2.94436	0.000121416	0.00206996
MIMAT0018926	5.10514	5.1537	1.65524	0.000123091	0.00208587
MIMAT0000226_1	-4.74442	-4.74869	7.20694	0.000126157	0.00212502
MIMAT0019047	-4.76908	-4.79927	1.39676	0.000131767	0.00220631
MIMAT0003331	8.06031	144269485	3.42335	0.000136014	0.00226395
MIMAT0022701	8.4286	1.44269e+08	-0.979956	0.000138523	0.00229215
MIMAT0005955	5.93755	6.11417	3.27908	0.000141999	0.00233593
MIMAT0019970	-7.93566	-1.44269e+08	-1.03862	0.000150244	0.00245719
MIMAT0004751	4.66263	4.66513	5.25418	0.000156066	0.00253764
MIMAT0030019	7.92292	1.44269e+08	1.24089	0.000161206	0.00260616
MIMAT0021128	8.46719	1.44269e+08	-1.11623	0.000163056	0.00262101
MIMAT0000454	4.60414	4.60456	7.28794	0.000164857	0.0026349
MIMAT0005922	7.87064	1.44269e+08	0.108276	0.000173759	0.00276148
MIMAT0014979	-4.74256	-4.78358	0.681566	0.00018027	0.00284887
MIMAT0002880	4.63633	4.63951	4.74801	0.000185475	0.00291476
MIMAT0000275_1	4.45191	4.45208	9.56943	0.000190928	0.00298377
MIMAT0004689	5.80158	5.98277	3.60114	0.000204897	0.00318439
MIMAT0019219	-7.35849	-1.44269e+08	-0.32705	0.000220123	0.00339373
MIMAT0021030	8.15008	1.44269e+08	-0.828302	0.000220779	0.00339373
MIMAT0004658	-7.47198	-1.44269e+08	-0.776094	0.000274837	0.00420171
MIMAT0000429	-4.3695	-4.37493	2.68371	0.000279188	0.00424517
MIMAT0000082	-4.02112	-4.02112	15.3468	0.000293598	0.00442371
MIMAT0000082_1	-4.02062	-4.02063	15.3459	0.000294075	0.00442371
MIMAT0004801	-4.40191	-4.40545	3.9489	0.000297619	0.0044532
MIMAT0000726	7.71995	1.44269e+08	1.98975	0.00030185	0.00449261
MIMAT0018925	7.60156	1.44269e+08	0.199912	0.000328975	0.00484849
MIMAT0004779_1	4.39337	4.40639	2.18322	0.000329208	0.00484849
MIMAT0000435	4.10422	4.10424	11.8799	0.000376024	0.00550915
MIMAT0004562	-5.02411	-5.1524	0.893317	0.000382619	0.00557672
MIMAT0000275	4.20116	4.20129	9.63644	0.000388463	0.00563272
MIMAT0017999	-7.15005	-1.44269e+08	-0.455806	0.000395589	0.00570662
MIMAT0004485	-4.32096	-4.32396	4.82245	0.000397995	0.00571204
MIMAT0000269	-4.2324	-4.24164	1.92767	0.000401021	0.00572625
MIMAT0015062	7.49789	1.44269e+08	0.878963	0.000418806	0.00595
MIMAT0026481	7.4852	1.44269e+08	0.326335	0.000429503	0.00607131
MIMAT0025470	5.50845	5.68876	3.30986	0.000435517	0.00612554
MIMAT0005881	4.26734	4.26829	6.82966	0.000449234	0.00628704
MIMAT0000261	3.968	3.96801	12.4105	0.000512769	0.00710696
MIMAT0004497	-4.22702	-4.22847	5.68795	0.000512873	0.00710696
MIMAT0017995	5.40595	5.58579	-0.177361	0.00051547	0.00710792
MIMAT0028222	4.92485	5.0177	1.62762	0.000545178	0.00744794
MIMAT0002804	-4.25169	-4.2675	2.11632	0.000545424	0.00744794
MIMAT0000078	-4.04624	-4.04636	10.1637	0.000549353	0.00746536
MIMAT0004556	-4.18858	-4.18942	5.93573	0.000553991	0.00747201
MIMAT0004507	4.15541	4.15605	7.73025	0.000555154	0.00747201
MIMAT0004779	4.16896	4.18058	2.16258	0.000569001	0.0076219
MIMAT0000430_1	-4.14622	-4.15657	3.22678	0.000587606	0.00783381
MIMAT0013516	-6.93852	-1.44269e+08	-0.332853	0.000641074	0.00850632
MIMAT0004486	-4.1223	-4.13182	3.53481	0.000685349	0.00905111
MIMAT0000420	-4.0721	-4.07256	7.43188	0.000706848	0.00929142
MIMAT0001536	-4.34449	-4.40252	1.03422	0.00072423	0.00947562
MIMAT0000084	-3.92367	-3.92377	10.4114	0.000741252	0.00965343
MIMAT0026612	5.16773	5.34704	0.24049	0.00074962	0.00971742
MIMAT0019022	7.32612	1.44269e+08	-0.313803	0.00076238	0.0098375
MIMAT0019912	-7.26986	-1.44269e+08	-1.19755	0.00076697	0.00985154
