# Supplementary material for: Global hypo-methylation in a proportion of glioblastoma enriched for an astrocytic signature is associated with increased invasion and altered immune landscape
Source: eLife journal article supplement (doi:10.7554/elife.77335), 2022-11-02
Supplement: fig2-data1 [file Figure_2_F_G_H.xlsx]

## Sheet: Figure 2
	Note: For source files relating to figures 2A-C & I-J (Motif enrichment analysis), see separate files
	Figure 2F	ssGSEA enrichment scores of CNS cells from this study and published studies for the ACS
		Garcia-Leon et al. iOPC	Swarup et al. iNeuron	TCW et al. pAstro	TCW et al. iAstro	TCW et al. NPC	iAPC	iNSC
		1.84023	1.80851	2.39034	2.4864	2.03572	2.363	2.34142
		1.91362	1.4864	2.40132	2.366	1.92111	2.2916	2.10635
		1.92372			2.42615		2.47806	2.20917
		1.92671			2.45825		2.47046	2.08876
							2.37792	2.05856
							2.36805	2.05123
							2.36379	2.1535
							2.36414	2.18793
							2.28107	2.34524
							2.39419	2.1365
	Figure 2G	iOPC and iNSC ssGSEA enrichment scores for the Oligodendrocyte-Specific-300 Signature
		iOPC	iNSC
		0.657786	0.615577
		0.655951	0.632839
		0.670957	0.610724
		0.60862	0.60411
		0.667915	0.593878
		0.620601	0.601746
		0.561769	0.59845
		0.614277	0.604193
		0.64232	0.629035
		0.629498	0.609735
	Figure 2H	iOPC and iNSC ssGSEA enrichment scores for the Oligodendrocyte-Enriched-300 Signature
		iOPC	iNSC
		0.688653	0.632377
		0.691601	0.64744
		0.689698	0.624469
		0.643796	0.624734
		0.695257	0.612632
		0.659025	0.615642
		0.590622	0.614166
		0.62788	0.623071
		0.669076	0.639972
		0.658627	0.625205
