# Supplementary material for: Global hypo-methylation in a proportion of glioblastoma enriched for an astrocytic signature is associated with increased invasion and altered immune landscape
Source: eLife journal article supplement (doi:10.7554/elife.77335), 2022-11-02
Supplement: fig2-figsupp1-data1 [file Figure_2_figure_supplement_1_A_C_D.xlsx]

## Sheet: Figure S2
	Figure 2-figure supplement 1 A	% Live cells positive for flow cytometry markers (Day 10 iAPCs)									% Live cells positive for flow cytometry markers (Day 20 iAPCs)
			Cell Type								Cell Type
		Marker	iAPC D10					iNSC			iAPC D20					iNSC
		NESTIN	97.5	99.9	99.8	99.7	99.8	80.9	97.7	95.8	99.9	99.9	98.4	98.3	99.1	97.9	99.6	97.5
		GFAP	90	96.8	62.1	78.9	66.9	50.7	53.2	38.8	48.3	92.7	60.6	67.6	98.8	9.47	93.2	74
		PDGFRA	0	0	0	0	0	0.062	0.028	0	0.038	0.011	0.046	0	0.018	0	0.027	0.12
		CD44	92.1	94.4	47.5	86.6	83.8	1.78	0.44	0.085	99.1	99.6	96.9	96.9	97.9	0	0.082	0.13
	Note: For raw images relating to Figure 2-figure supplement 1 B, see separate files
	Figure 2-figure supplement 1 C	Concentration (pg/mL) of IL6 produced by iAPCs and iNSCs +/- LPS treatment
			Treatment
		Line	-LPS							+LPS
		iAPC19	2.415	4.249	14.352	97.305	5.041			13.123	31.601	36.825	248.777	15.807
		iAPC31	51.821	33.256	65.498	37.588	5.448	4.792	36.345	83.155	55.099	84.905	130.726	28.186	13.198	87.734
		iAPC44	6.708	14.905	0	43.294	12.815	22.938	14.857	34.283	82.786	134.455	258.549	124.857	185.804	109.531
		iAPC50	10.156	13.801	0	47.305	12.811	8.661		162.221	271.755	150.113	304.352	110.279	57.001
		iAPC52	19.454	19.819	54.69	82.046	218.479	194.454		150.651	139.279	209.647	292.938	364.749	396.407
		iNSC	0	0	0	0.538				0.217	0.217	0.818	3.62
	Figure 2-figure supplement 1 D	Cell counts of iNSCs and iAPCs D20 from D0 to D4, each replicate is an average of 3 technical replicates
		Day	iNSC					iAPC D20
		0	20000	20000	20000	20000	20000	20000	20000	20000	20000	20000
		2	9833.33	33833.3	24666.7	32333.3	30166.7	47000	25333.3	42333.3	27500	44666.7
		3	13333.3	38833.3	27666.7	41666.7	53333.3	87500	33000	84166.7	41333.3	93500
		4	26833.3	56833.3	81000	86333.3	81833.3	151500	55833.3	158667	58833.3	225833
	Note: For source files relating to Figure 2-figure supplement 1 G & H (motif enrichment analysis), see separate files
