# Supplementary material for: Global hypo-methylation in a proportion of glioblastoma enriched for an astrocytic signature is associated with increased invasion and altered immune landscape
Source: eLife journal article supplement (doi:10.7554/elife.77335), 2022-11-02
Supplement: fig3-data1 [file Figure_3_A-H.xlsx]

## Sheet: Figure 3
	Figure 3A	ssGSEA enrichment scores of GICs for the ACS and 2 OPC signatures
			Signature
		GIC Line No.	ACS		OPC Enriched-300		OPC Specific-300
		17	0.814521	0.808044	0.657331	0.638268	0.634569	0.6152
		18	0.641703	0.648358	0.61112	0.614601	0.598081	0.600581
		19	0.710847	0.714785	0.585042	0.596799	0.571813	0.587133
		26	0.690412	0.650393	0.592427	0.66518	0.574676	0.636511
		30	0.766763	0.758352	0.618352	0.653866	0.60318	0.634134
		31	0.728574	0.716136	0.652827	0.655045	0.643002	0.64428
		50	0.704056	0.627603	0.620717	0.604307	0.611368	0.602363
		52	0.640861	0.639869	0.619475	0.628128	0.601015	0.609152
		54	0.608278	0.608792	0.585179	0.586302	0.570817	0.573961
		61	0.611567	0.609925	0.636031	0.615024	0.627309	0.611905
	Figure 3B	ssGSEA enrichment scores of pseuobulk scRNAseq samples for the ACS and 2 OPC signatures
		Sample	ACS	OPC Enriched-300	OPC Specific-300
		MGH102	1.4611	2.04198	1.80966
		MGH105	2.02888	1.67996	1.39651
		MGH114	1.9094	1.89117	1.6102
		MGH115	1.74846	1.75839	1.51083
		MGH118	1.39771	1.99726	1.67718
		MGH124	1.78247	1.89241	1.62703
		MGH125	1.85407	2.32324	2.01096
		MGH126	1.48967	1.52825	1.49308
		MGH143	1.93952	1.50154	1.36677
		ND1	1.69467	2.12124	1.8833
		ND2	2.0775	2.02469	1.79546
		ND3	1.75421	2.19258	2.01641
		ND4	1.71527	1.55845	1.4186
		ND5	1.61651	2.36677	2.19064
		ND6	1.7403	2.02174	1.81651
	Figure 3C	% Cells from scRNAseq datasets enriched for ACS and 2 OPC signatures
		Row	patient	module	n_cells	percent_cells
		1	MGH102	ACS	125	11.9161
		2	MGH105	ACS	2129	85.2282
		3	MGH114	ACS	54	63.5294
		4	MGH115	ACS	201	41.6149
		5	MGH118	ACS	90	43.6893
		6	MGH124	ACS	371	39.0116
		7	MGH125	ACS	188	22.1698
		8	MGH126	ACS	13	28.8889
		9	MGH143	ACS	2079	99.808
		10	ND1	ACS	111	21.2644
		11	ND2	ACS	426	49.5349
		12	ND3	ACS	185	11.7684
		13	ND4	ACS	656	77.2674
		14	ND5	ACS	561	18.8192
		15	ND6	ACS	213	23.484
		16	MGH102	OPC Enriched-300	627	59.7712
		17	MGH105	OPC Enriched-300	333	13.3307
		18	MGH114	OPC Enriched-300	22	25.8824
		19	MGH115	OPC Enriched-300	269	55.6936
		20	MGH118	OPC Enriched-300	100	48.5437
		21	MGH124	OPC Enriched-300	429	45.1104
		22	MGH125	OPC Enriched-300	570	67.217
		23	MGH126	OPC Enriched-300	15	33.3333
		24	MGH143	OPC Enriched-300	2	0.0960154
		25	ND1	OPC Enriched-300	332	63.6015
		26	ND2	OPC Enriched-300	410	47.6744
		27	ND3	OPC Enriched-300	966	61.4504
		28	ND4	OPC Enriched-300	123	14.4876
		29	ND5	OPC Enriched-300	1876	62.9319
		30	ND6	OPC Enriched-300	621	68.4675
		31	MGH102	OPC Specific-300	297	28.3127
		32	MGH105	OPC Specific-300	36	1.44115
		33	MGH114	OPC Specific-300	9	10.5882
		34	MGH115	OPC Specific-300	13	2.69151
		35	MGH118	OPC Specific-300	16	7.76699
		36	MGH124	OPC Specific-300	151	15.878
		37	MGH125	OPC Specific-300	90	10.6132
		38	MGH126	OPC Specific-300	17	37.7778
		39	MGH143	OPC Specific-300	2	0.0960154
		40	ND1	OPC Specific-300	79	15.1341
		41	ND2	OPC Specific-300	24	2.7907
		42	ND3	OPC Specific-300	421	26.7812
		43	ND4	OPC Specific-300	70	8.24499
		44	ND5	OPC Specific-300	544	18.2489
		45	ND6	OPC Specific-300	73	8.04851
	Figure 3D	Correlation of GIC ssGSEA enrichment scores for the ACS and the percentage hypo-methylated DMRs when compared against all iNSCs
		GIC Line	Enrichment Score	iNSC17	iNSC18	iNSC19	iNSC26	iNSC30	iNSC31	iNSC50	iNSC52	iNSC54	iNSC61
		GIC17	0.811282	62.5059	60.263	58.7294	48.1985	71.1871	69.0496	59.36	54.2782	61.9532	62.1835
		GIC18	0.645031	58.5692	53.0639	54.792	44.6474	66.8331	64.8412	56.2897	51.3292	59.0551	58.2827
		GIC19	0.712816	85.1314	83.3936	81.8779	78.2038	87.6607	86.6084	84.0278	81.0662	84.1817	85.2351
		GIC26	0.670403	65.5977	61.1921	58.4452	47.1009	71.3829	68.4676	62.0887	55.5055	62.542	64.5718
		GIC30	0.762558	84.8664	83.6214	81.9638	77.8868	88.0718	87.0958	84.142	80.8429	84.2275	85.6983
		GIC31	0.722355	79.1516	75.8429	75.4367	70	83.3526	82.4831	78.6598	74.3842	78.7451	80.4514
		GIC50	0.665829	46.8095	42.0314	44.5848	34.2366	56.8328	55.3291	42.3604	39.1938	46.5338	45.1713
		GIC52	0.640365	45.9219	41.5627	41.7006	32	55.2621	52.8771	42.9357	37.9856	46.223	45.8779
		GIC54	0.608535	32.9006	28.1901	28.3951	19.7329	40.675	38.4332	27.1359	24.2973	30.6685	30.0479
		GIC61	0.610746	50.0701	44.5853	46.6346	36.0242	60.0392	57.1781	45.3476	41.537	49.0063	47.9473
	Figure 3E	Correlation of HGCC GIC ssGSEA enrichment scores for the ACS and the percentage hypo-methylated DMRs when compared against all iNSCs
		GIC Line	Enrichment Score	iNSC31	iNSC19	iNSC50	iNSC52
		3214	1.09854	70.41	60.83	58.16	55.03
		3027	0.995598	72.33	65.21	62.54	60.65
		3008	0.855138	68.67	61.71	58.52	54.99
		3220	0.950315	58.75	50.82	48.08	45.26
		3212	1.04534	28.39	21.86	18.64	16.35
		3172	0.744247	47.47	38.4	36.83	33.96
		3078	0.795457	77.66	70.01	67.81	65.24
		3140	0.922417	64.4	54.61	47.44	47.43
		3054	0.802363	61.11	51.48	45.15	45.2
		3102	1.0919	84.48	78.84	77.15	75.76
		3029	0.962241	76.03	71.1	67.99	66.97
		3272	1.07793	68.72	58.82	55.9	52.56
		3243	0.712256	35.52	27.56	22.99	20.42
		3110	0.915337	76.52	69.51	67.91	65.68
		3146	0.521223	32.78	24.15	20.77	19.79
		3299	0.478566	73.05	67.48	64.88	63.05
		3274	1.14486	93.99	92.11	91.79	90.91
		3051	0.88925	55.15	47.13	44.56	43.22
		3187	0.904841	79.61	75.66	73.81	71.99
		3263	0.587781	58.88	49.27	46.27	42.17
		3265	0.522034	34.4	27.15	23.42	21.31
		3226	0.834118	89.01	86.56	85.25	83.98
		3033	0.90494	36.92	26.42	23.63	21.02
		3085	0.696997	57.93	47.36	43.72	41.97
		3021	0.862358	72.25	63.97	61.69	60.22
		3073	0.821307	88.11	85.39	84.5	83.38
		3289	0.959722	82.48	77.16	75.19	74.02
		3016	0.775427	61.56	51.63	44.41	43.82
		3205	0.684993	41.3	33.65	29.66	26.42
		3245	0.516453	39.56	30.28	25.01	23.68
		3065	0.753349	43.39	34.39	29.54	28
		3167	0.801454	57.61	46.9	42.43	39.81
		3182	0.717746	68.11	59.05	55.64	53.63
		3047	0.517066	66.76	58.76	56.18	54.6
		3088	0.987594	58.9	49.02	44.3	42.96
		3173	0.948354	57.86	47.19	43.48	40.58
		3257	1.00469	73.55	66.28	62.59	61.33
		3279	0.929743	79.7	72.03	68.78	66.4
		3028	0.953137	57.93	48.36	43.31	42.17
		3275	0.919001	93.25	90.95	90.16	89.77
		3206	0.563312	83.27	78.13	75.91	73.78
		3035	1.03211	88.76	84.46	83.5	81.38
		3037	0.968619	86.4	81.34	80.12	77.92
		3056	0.70525	23.6	17.03	13.68	12.02
		3117	0.999382	43.55	34.66	28.44	26.89
		3202	0.809255	81.07	74.66	72.23	70.73
		3013	0.80298	53.97	43.81	38.14	36.29
		3062	1.08822	74.01	66.11	63.93	61.94
		3213	1.1542	72.01	62.69	59.02	55.6
		3137	0.967854	85.95	80.63	79	77.79
		3039	1.09384	79	72.51	70.06	67.99
		3020	0.684218	78.24	73.65	71.58	69.64
		3291	0.875331	58.23	46.8	41.91	39.05
		3060	0.987856	73.1	66.64	64.03	61.94
		3009	0.576473	32.12	26.41	21.21	20.99
		3031	0.927204	68.7	61.94	58.65	56.96
		3046	0.825874	32.25	23.11	17.99	16.31
		3053	0.9202	53.29	42.69	38.55	36.45
		3242	1.0502	51.01	39.83	33.54	32.31
		3068	1.05669	53.17	42.79	38	36.26
		3017	0.73022	38.44	27.37	21.44	20.78
		3123	0.823236	47.45	35.27	31.91	29.13
		3002	0.698892	46.58	34.59	29.76	27.86
		3235	0.966118	92.48	90.61	89.75	89.08
		3179	0.520575	54.61	45.69	43.39	41.06
		3086	0.607903	63.83	53.18	50.59	47.12
		3180	0.628512	57.3	46.63	43.19	39.83
		3019	0.77367	47.57	36.87	33.67	30.59
		3118	0.978261	45.79	37.1	30.44	29.01
		3129	0.540136	57.97	49.6	47.5	45.77
		3221	1.04277	66.59	59.23	57.74	54.5

## Sheet: Figure 3F
DEGs Identified when comparing bias vs unbias GICs from this study
	logFC	unshrunk.logFC	logCPM	PValue	FDR
ENSG00000106333	4.58043	4.58085	6.71129	5.98718e-15	8.42816e-11
ENSG00000180044	4.72153	4.72761	3.01035	9.74351e-14	6.85797e-10
ENSG00000135318	2.67642	2.67645	8.45782	1.53836e-13	7.21852e-10
ENSG00000162576	2.72901	2.72967	4.24586	3.8181e-13	1.34368e-09
ENSG00000164619	3.80641	3.8085	3.6493	1.00994e-12	2.84338e-09
ENSG00000177374	3.24747	3.25153	2.14994	1.79772e-12	3.5619e-09
ENSG00000080573	4.02142	4.02171	6.71568	1.98756e-12	3.5619e-09
ENSG00000101825	7.77758	7.78249	6.34712	2.02424e-12	3.5619e-09
ENSG00000117122	6.69406	6.70649	3.93194	3.59516e-12	5.62323e-09
ENSG00000137331	4.67732	4.68108	3.65751	8.59172e-12	1.20946e-08
ENSG00000134013	3.77119	3.77141	6.834	1.39899e-11	1.79033e-08
ENSG00000171812	4.49336	4.49425	5.55256	2.55179e-11	2.99346e-08
ENSG00000123342	3.32181	3.32654	2.00594	5.89688e-11	6.38541e-08
ENSG00000154930	-2.23877	-2.23893	6.14418	1.1658e-10	1.17222e-07
ENSG00000106991	3.94419	3.94564	4.30964	1.44193e-10	1.3532e-07
ENSG00000138080	4.25256	4.25279	7.25878	1.68735e-10	1.45766e-07
ENSG00000136002	-2.98759	-2.98799	5.67559	1.76034e-10	1.45766e-07
ENSG00000105825	3.74802	3.74843	5.95905	2.31035e-10	1.80682e-07
ENSG00000106538	3.98819	3.99472	2.19462	2.51299e-10	1.86186e-07
ENSG00000128591	3.18945	3.18956	7.3038	3.18501e-10	2.24177e-07
ENSG00000111799	5.92321	5.92393	7.26632	3.9179e-10	2.6263e-07
ENSG00000113083	4.37424	4.37465	6.5473	8.41807e-10	5.32646e-07
ENSG00000187955	5.65208	5.65255	7.62773	8.70274e-10	5.32646e-07
ENSG00000116741	2.69155	2.69195	4.90961	9.40104e-10	5.5141e-07
ENSG00000120820	3.36803	3.37107	2.68166	1.50494e-09	8.47399e-07
ENSG00000020181	4.04619	4.04789	4.17509	2.49065e-09	1.3485e-06
ENSG00000162733	2.48893	2.489	7.41034	5.57928e-09	2.86872e-06
ENSG00000132000	3.40329	3.40781	2.15374	5.70605e-09	2.86872e-06
ENSG00000161921	-2.0792	-2.0795	5.09106	5.98696e-09	2.90615e-06
ENSG00000120156	4.96302	4.96651	4.04513	6.67958e-09	3.10224e-06
ENSG00000144824	2.47128	2.47219	3.52566	6.83167e-09	3.10224e-06
ENSG00000166250	3.44737	3.44786	5.36707	1.27781e-08	5.62115e-06
ENSG00000164220	4.04821	4.05078	3.58796	2.25937e-08	9.63794e-06
ENSG00000118523	3.02408	3.02411	8.72275	3.26622e-08	1.34022e-05
ENSG00000164692	5.61	5.61006	10.4563	3.33221e-08	1.34022e-05
ENSG00000232815	2.82575	2.82906	2.03195	5.70435e-08	2.23056e-05
ENSG00000113749	3.6205	3.62163	4.35099	6.10222e-08	2.32165e-05
ENSG00000144843	1.88598	1.88678	3.11579	6.65091e-08	2.46381e-05
ENSG00000082497	4.4508	4.45514	3.22921	9.51105e-08	3.433e-05
ENSG00000143387	2.62349	2.62448	3.5635	1.09247e-07	3.84467e-05
ENSG00000141837	2.6643	2.66463	5.15301	1.28071e-07	4.39721e-05
ENSG00000163430	1.85798	1.85799	8.62003	1.55847e-07	5.0395e-05
ENSG00000163531	1.80562	1.80568	6.67673	1.5695e-07	5.0395e-05
ENSG00000179954	3.215	3.21622	3.84266	1.57518e-07	5.0395e-05
ENSG00000170075	-3.88225	-3.88265	6.58372	1.62566e-07	5.08544e-05
ENSG00000253537	4.67503	4.67913	3.5274	1.73275e-07	5.30259e-05
ENSG00000135862	1.95641	1.95642	9.85003	2.2066e-07	6.60899e-05
ENSG00000142798	1.79905	1.79923	5.16146	2.42986e-07	7.12606e-05
ENSG00000166147	3.03049	3.03061	6.92767	2.85988e-07	8.21604e-05
ENSG00000164300	-1.79898	-1.79905	6.94446	3.7341e-07	0.00010513
ENSG00000109220	2.13628	2.13666	4.45626	3.92285e-07	0.000108278
ENSG00000115594	3.60558	3.61101	2.08522	4.21768e-07	0.000112085
ENSG00000142632	1.93748	1.93993	1.56476	4.22001e-07	0.000112085
ENSG00000068078	-2.60222	-2.60239	6.5177	4.84651e-07	0.000124225
ENSG00000124126	-1.51213	-1.51214	9.12532	4.85358e-07	0.000124225
ENSG00000140416	2.30701	2.30709	6.86166	5.68171e-07	0.000140805
ENSG00000181291	-2.2644	-2.26653	2.48136	5.70141e-07	0.000140805
ENSG00000092607	3.31422	3.31546	3.91983	6.36328e-07	0.000154441
ENSG00000170545	2.1628	2.16377	3.12863	7.32102e-07	0.000174675
ENSG00000167178	2.91937	2.92151	2.7445	7.95501e-07	0.000186444
ENSG00000121577	2.39008	2.39399	1.36504	8.0792e-07	0.000186444
ENSG00000002746	3.91859	3.92252	2.85118	8.69184e-07	0.000197347
ENSG00000177096	2.51266	2.51475	2.38036	9.57043e-07	0.000213846
ENSG00000116774	2.50397	2.50418	5.6971	1.08235e-06	0.000236812
ENSG00000106034	3.4975	3.5021	2.2176	1.09347e-06	0.000236812
ENSG00000181649	3.94726	3.94905	4.01133	1.16332e-06	0.000248122
ENSG00000179242	-2.22723	-2.22727	8.39428	1.28972e-06	0.000270977
ENSG00000156265	2.82009	2.82063	4.61948	1.41911e-06	0.000291967
ENSG00000161638	2.34241	2.34251	6.54465	1.43111e-06	0.000291967
ENSG00000158270	5.04346	5.04632	4.40473	1.68722e-06	0.0003393
ENSG00000102554	2.32463	2.3257	3.1404	1.73051e-06	0.000339397
ENSG00000204128	-2.54829	-2.5487	5.14721	1.73592e-06	0.000339397
ENSG00000142173	3.12577	3.12579	9.89879	1.80251e-06	0.000347588
ENSG00000250120	3.49278	3.49503	3.2345	1.96163e-06	0.000367124
ENSG00000170891	3.1028	3.10332	4.94051	1.96445e-06	0.000367124
ENSG00000164122	2.22123	2.22632	0.831602	1.98206e-06	0.000367124
ENSG00000185585	3.0047	3.00486	6.5583	2.01921e-06	0.000369148
ENSG00000173805	-1.56404	-1.56417	5.6935	2.0885e-06	0.000376921
ENSG00000115232	4.51893	4.5206	4.66813	2.25009e-06	0.000400943
ENSG00000125462	-2.33736	-2.3374	8.30758	2.33479e-06	0.000410835
ENSG00000119681	2.68551	2.68579	5.41997	2.58381e-06	0.000449041
ENSG00000175084	2.7525	2.75743	1.39729	2.6483e-06	0.000454636
ENSG00000139629	3.79786	3.80204	2.6475	2.70039e-06	0.000457992
ENSG00000178031	2.57985	2.58043	4.27141	2.98706e-06	0.000499505
ENSG00000069702	2.34917	2.35046	2.90866	3.01612e-06	0.000499505
ENSG00000204099	-4.11443	-4.12034	2.97225	3.20634e-06	0.000524833
ENSG00000277196	-3.777	-3.78731	1.82852	3.28472e-06	0.000531482
ENSG00000142156	2.3937	2.39371	10.6728	3.44423e-06	0.000550959
ENSG00000149451	3.89251	3.89622	2.90752	3.60319e-06	0.000569911
ENSG00000177363	2.55714	2.55857	2.96407	3.92899e-06	0.000614538
ENSG00000198542	4.75094	4.7574	2.95351	4.11458e-06	0.000636495
ENSG00000240583	3.9736	3.97432	5.34652	4.23788e-06	0.000648441
ENSG00000136603	1.32464	1.32483	4.49553	4.31601e-06	0.000653296
ENSG00000157227	2.2975	2.29752	8.99234	4.4611e-06	0.000668073
ENSG00000108821	5.15089	5.15096	9.8415	4.53066e-06	0.000671348
ENSG00000168140	2.20869	2.20916	4.24108	4.60761e-06	0.000675639
ENSG00000113721	2.66144	2.66161	6.10503	4.78804e-06	0.000688788
ENSG00000164330	2.82759	2.83007	2.44617	4.79514e-06	0.000688788
ENSG00000248866	2.63301	2.63685	1.62852	4.85902e-06	0.000690914
ENSG00000147872	3.44944	3.45044	4.34876	4.93061e-06	0.000694082
ENSG00000152104	1.70762	1.70769	6.31975	5.33489e-06	0.000742472
ENSG00000204789	-2.29715	-2.30023	1.98765	5.37985e-06	0.000742472
ENSG00000162745	2.3459	2.34624	4.813	5.77956e-06	0.000789892
ENSG00000150961	1.45804	1.45811	6.11174	5.97951e-06	0.000809361
ENSG00000158859	2.55074	2.55101	5.35559	6.26462e-06	0.000839876
ENSG00000181458	2.55799	2.55853	4.34628	6.55051e-06	0.000869921
ENSG00000135506	2.59515	2.59518	8.87319	6.6583e-06	0.000875971
ENSG00000187720	3.65202	3.65262	5.30048	6.9973e-06	0.000912046
ENSG00000166897	-2.89902	-2.90411	1.93168	7.08972e-06	0.000915615
ENSG00000183155	2.79642	2.79662	6.07636	7.28865e-06	0.000932748
ENSG00000163359	5.07563	5.07614	6.93015	7.75124e-06	0.000983011
ENSG00000135074	1.85647	1.8565	7.64522	7.91777e-06	0.000987685
ENSG00000130635	3.01072	3.01077	8.21554	7.92843e-06	0.000987685
ENSG00000109610	3.07184	3.0723	5.11043	8.07899e-06	0.000997614
ENSG00000185483	2.10703	2.10816	2.85032	8.3921e-06	0.00102727
ENSG00000019549	2.11086	2.11111	5.04956	8.9596e-06	0.00108728
ENSG00000168309	-4.52158	-4.52288	5.56143	9.05894e-06	0.00108994
ENSG00000174600	3.87172	3.87271	4.79668	9.51251e-06	0.00113481
ENSG00000152818	1.44029	1.44034	6.74608	9.74549e-06	0.00114383
ENSG00000205730	1.54328	1.54343	5.07576	9.75067e-06	0.00114383
ENSG00000157404	3.69305	3.69742	2.48068	9.88345e-06	0.00114983
ENSG00000112294	-1.70112	-1.70123	6.02387	1.04204e-05	0.00120236
ENSG00000115461	2.6296	2.62961	10.7242	1.07615e-05	0.00123163
ENSG00000083444	1.25895	1.25897	7.64952	1.1156e-05	0.00126648
ENSG00000004776	2.72243	2.72365	3.35308	1.1467e-05	0.00129137
ENSG00000142871	2.28349	2.28353	7.83943	1.17963e-05	0.00131791
ENSG00000154764	-3.21139	-3.22191	1.22775	1.20112e-05	0.00132372
ENSG00000164107	3.69411	3.69671	3.22592	1.20363e-05	0.00132372
ENSG00000122861	2.14907	2.14947	4.3861	1.34601e-05	0.00146882
ENSG00000145721	-2.98731	-2.997	1.1095	1.39903e-05	0.00151493
ENSG00000279690	-2.69609	-2.69722	3.85635	1.41536e-05	0.00152092
ENSG00000272841	1.90258	1.90303	3.96358	1.51619e-05	0.00161692
ENSG00000101335	3.94487	3.94581	4.94464	1.54865e-05	0.00163913
ENSG00000205221	4.87462	4.87811	3.95994	1.5816e-05	0.0016499
ENSG00000150093	1.52867	1.52868	9.06132	1.58227e-05	0.0016499
ENSG00000257315	2.66734	2.66793	4.35347	1.62794e-05	0.00168504
ENSG00000105974	2.48043	2.48047	8.02055	1.70066e-05	0.00174746
ENSG00000205929	-2.69208	-2.69288	4.3438	1.73888e-05	0.00175011
ENSG00000133110	4.97173	4.97175	11.0136	1.73908e-05	0.00175011
ENSG00000154734	3.03616	3.03637	6.21493	1.74707e-05	0.00175011
ENSG00000175040	1.44645	1.44648	7.42969	1.75297e-05	0.00175011
ENSG00000176170	2.10538	2.10636	3.06082	1.77362e-05	0.00175825
ENSG00000137801	2.72353	2.72358	8.2165	1.8002e-05	0.00177213
ENSG00000138131	2.12542	2.12702	2.37053	1.8231e-05	0.00178221
ENSG00000104435	4.03068	4.03183	4.71488	1.88587e-05	0.00183085
ENSG00000136153	1.49105	1.49121	4.95328	1.91989e-05	0.00185111
ENSG00000182379	1.95571	1.95668	2.91156	1.93893e-05	0.00185676
ENSG00000077942	3.00725	3.00738	6.92878	2.0903e-05	0.00198581
ENSG00000064655	-3.88744	-3.89175	3.1938	2.10191e-05	0.00198581
ENSG00000182004	2.65608	2.65616	7.18525	2.25204e-05	0.00211346
ENSG00000154175	3.03807	3.03999	3.02204	2.36817e-05	0.00220773
ENSG00000183160	5.25291	5.25728	4.00522	2.4441e-05	0.00226352
ENSG00000143333	1.83488	1.83503	5.42007	2.59319e-05	0.0023859
ENSG00000081923	2.60576	2.6073	2.91567	2.69571e-05	0.00246412
ENSG00000142149	1.71653	1.71664	5.78056	2.74958e-05	0.00249715
ENSG00000130707	2.44238	2.44259	5.63105	2.91981e-05	0.00263078
ENSG00000132164	-3.81129	-3.81226	5.24982	2.9341e-05	0.00263078
ENSG00000101188	2.90488	2.90565	4.19562	3.01999e-05	0.00269066
ENSG00000174348	2.3951	2.39804	1.77724	3.13011e-05	0.00277123
ENSG00000100196	1.67732	1.67763	4.21492	3.2489e-05	0.00285842
ENSG00000170955	3.92407	3.92744	3.07533	3.35919e-05	0.0029371
ENSG00000184144	3.30536	3.30612	4.60974	3.50318e-05	0.00304409
ENSG00000149591	3.29705	3.29762	5.0187	3.54145e-05	0.00305846
ENSG00000204219	2.10928	2.11146	1.90937	3.58463e-05	0.00307688
ENSG00000185070	3.71618	3.71762	4.08844	3.8837e-05	0.00331338
ENSG00000168477	2.88764	2.88869	3.73377	4.02113e-05	0.00340997
ENSG00000106537	1.32119	1.32124	6.55326	4.21124e-05	0.00353974
ENSG00000042493	1.89994	1.90015	5.07106	4.24143e-05	0.00353974
ENSG00000163873	-2.3173	-2.31736	7.65478	4.24961e-05	0.00353974
ENSG00000159871	-2.10395	-2.11095	0.61793	4.30902e-05	0.00355241
ENSG00000146674	2.65263	2.65264	9.69517	4.31528e-05	0.00355241
ENSG00000110841	1.1773	1.17733	7.01901	4.34632e-05	0.00355716
ENSG00000135824	2.38191	2.38334	2.79044	4.45818e-05	0.00360654
ENSG00000100097	1.60332	1.60333	8.69037	4.46778e-05	0.00360654
ENSG00000114861	2.29088	2.29154	3.8012	4.48352e-05	0.00360654
ENSG00000214425	-1.68407	-1.68526	2.62673	4.56797e-05	0.00365352
ENSG00000104267	-2.72741	-2.72804	4.74098	4.59383e-05	0.00365352
ENSG00000184178	1.9485	1.94856	6.92118	4.82582e-05	0.00381647
ENSG00000116254	2.42215	2.42573	1.52462	5.00061e-05	0.00390835
ENSG00000137727	-2.55309	-2.554	4.02291	5.00613e-05	0.00390835
ENSG00000238113	2.25953	2.26131	2.35875	5.0253e-05	0.00390835
ENSG00000138795	2.0646	2.06491	4.68187	5.11643e-05	0.00395736
ENSG00000128833	-2.3729	-2.37341	4.65926	5.41072e-05	0.00416211
ENSG00000109743	1.96127	1.9626	2.46792	5.71297e-05	0.00437073
ENSG00000188674	-2.3058	-2.30629	4.63429	6.02679e-05	0.0045859
ENSG00000197467	3.71615	3.718	3.73499	6.20023e-05	0.00469251
ENSG00000091136	1.86599	1.86601	8.20285	6.50385e-05	0.00485099
ENSG00000172575	-2.62717	-2.62852	3.53659	6.53059e-05	0.00485099
ENSG00000126583	-2.63732	-2.64379	1.31078	6.57649e-05	0.00485099
ENSG00000132692	-2.74038	-2.74041	9.21008	6.60113e-05	0.00485099
ENSG00000111885	2.47471	2.47485	6.29231	6.60208e-05	0.00485099
ENSG00000186815	1.80872	1.80886	5.50042	6.61639e-05	0.00485099
ENSG00000142552	2.10474	2.10521	4.10336	6.79473e-05	0.00493113
ENSG00000112137	2.77883	2.7808	2.7227	6.79576e-05	0.00493113
ENSG00000122691	3.82119	3.82449	3.0089	6.8749e-05	0.00496297
ENSG00000135324	1.72214	1.72262	3.66867	7.03469e-05	0.00505241
ENSG00000139329	4.58249	4.58337	5.64401	7.31291e-05	0.00522557
ENSG00000172780	1.36544	1.36913	0.352194	7.4425e-05	0.00529132
ENSG00000164591	1.49688	1.50053	0.522877	7.51977e-05	0.00531939
ENSG00000163378	1.31254	1.31278	4.12269	7.56729e-05	0.00532624
ENSG00000267221	-1.67132	-1.674	1.4463	7.63346e-05	0.00534608
ENSG00000198743	1.65504	1.65508	7.2167	7.69127e-05	0.0053599
ENSG00000167460	1.3668	1.36681	9.35116	8.01427e-05	0.00553212
ENSG00000157168	2.64499	2.64637	3.10587	8.03438e-05	0.00553212
ENSG00000136149	-1.72822	-1.73251	0.862863	8.05629e-05	0.00553212
ENSG00000254585	2.7809	2.78335	2.42192	8.56206e-05	0.00585088
ENSG00000229619	1.36003	1.36149	1.64233	8.66065e-05	0.00588966
ENSG00000162490	1.91822	1.91826	7.68991	8.73806e-05	0.00591374
ENSG00000069188	-2.80711	-2.80836	3.84135	9.15562e-05	0.00616669
ENSG00000158615	1.99206	1.99209	7.66955	9.56958e-05	0.00641481
ENSG00000189060	1.64416	1.64421	6.91175	9.61816e-05	0.00641682
ENSG00000175426	3.61481	3.61589	4.40615	9.82612e-05	0.00652464
ENSG00000197879	1.33188	1.33193	6.27717	0.000101827	0.00671068
ENSG00000163513	2.82062	2.82099	5.18074	0.000102422	0.00671068
ENSG00000164398	-2.08052	-2.08146	3.43748	0.000102493	0.00671068
ENSG00000072422	1.43601	1.43617	4.8435	0.000104056	0.00678145
ENSG00000116132	1.5397	1.53974	7.30404	0.000105477	0.0068424
ENSG00000142408	-1.81235	-1.81256	5.29593	0.000107172	0.00692046
ENSG00000182158	1.35826	1.3583	6.55161	0.000110971	0.00713305
ENSG00000128805	2.19941	2.20036	3.20045	0.000113903	0.00725149
ENSG00000149090	2.91797	2.91937	3.347	0.000114115	0.00725149
ENSG00000115884	1.43591	1.43596	6.81186	0.000114655	0.00725149
ENSG00000254122	-5.7296	-5.73282	5.47634	0.000114874	0.00725149
ENSG00000136010	1.59119	1.59148	4.22045	0.000117252	0.007326
ENSG00000177807	-1.86121	-1.8613	6.59661	0.000117313	0.007326
ENSG00000035403	1.23517	1.2352	7.37577	0.000117616	0.007326
ENSG00000169908	1.88593	1.88603	6.22663	0.000118463	0.00734625
ENSG00000197712	1.45284	1.45303	4.70338	0.000121078	0.0074755
ENSG00000135454	2.31621	2.31632	6.41562	0.000121711	0.00748176
ENSG00000277586	4.40213	4.40227	8.10822	0.00012396	0.00753795
ENSG00000245648	2.73587	2.74059	1.44032	0.000124163	0.00753795
ENSG00000075426	1.71401	1.71409	6.24577	0.000124231	0.00753795
ENSG00000110811	1.20364	1.20373	5.402	0.00012709	0.00767829
ENSG00000254919	-2.55584	-2.55816	2.68255	0.000130603	0.00785682
ENSG00000164932	2.67503	2.67608	3.53418	0.000133554	0.00800018
ENSG00000158258	2.33579	2.33771	2.32648	0.000145334	0.00866894
ENSG00000143320	1.62125	1.62189	3.14054	0.000147093	0.0087368
ENSG00000108932	2.61144	2.61623	1.29898	0.000150576	0.00888304
ENSG00000183496	1.37818	1.37859	3.46781	0.000151066	0.00888304
ENSG00000197256	1.37913	1.37916	7.48621	0.000151555	0.00888304
ENSG00000075651	1.3161	1.31643	3.7182	0.000152079	0.00888304
ENSG00000101144	-1.96854	-1.9686	7.35336	0.000155278	0.00901026
ENSG00000156049	2.03381	2.03616	1.72162	0.000155537	0.00901026
ENSG00000197921	-3.76887	-3.76941	6.04885	0.000157871	0.00910799
ENSG00000105088	2.40029	2.40036	7.13501	0.00016052	0.00920549
ENSG00000171502	3.09481	3.09943	1.81872	0.000160869	0.00920549
ENSG00000144218	1.528	1.52813	5.40621	0.000164069	0.00935062
ENSG00000156298	-1.98043	-1.98059	5.86748	0.000172534	0.00979337
ENSG00000163701	1.49249	1.4954	0.832496	0.000173369	0.00980125
ENSG00000065308	1.33091	1.33093	7.60565	0.000174829	0.00984427
ENSG00000267374	-2.27716	-2.27903	2.6824	0.000176672	0.00988655
ENSG00000161381	3.01733	3.02012	2.46682	0.000177418	0.00988655
ENSG00000126562	2.92493	2.92605	3.6749	0.000177687	0.00988655
ENSG00000141682	2.96612	2.96673	4.59625	0.000180247	0.00998953
ENSG00000145416	1.93871	1.94005	2.42864	0.000182983	0.0101014
ENSG00000177706	1.2821	1.28213	7.08244	0.00018639	0.0102493
ENSG00000116285	1.41657	1.41663	6.3823	0.00019023	0.0104197
ENSG00000143641	1.09796	1.09797	7.97951	0.000194707	0.0106236
ENSG00000149257	1.21418	1.21419	7.70975	0.000198861	0.0108084
ENSG00000078053	2.6379	2.63851	4.2483	0.000201768	0.0108896
ENSG00000196878	2.69215	2.69252	5.05786	0.000201902	0.0108896
ENSG00000075043	-1.97154	-1.9716	7.15419	0.000204123	0.0109673
ENSG00000185090	-1.76463	-1.765	4.4013	0.00020748	0.0111053
ENSG00000176142	1.2218	1.22196	4.64727	0.000208679	0.0111272
ENSG00000111817	1.66326	1.66359	4.13745	0.000212126	0.0112683
ENSG00000112297	2.57675	2.57703	5.3305	0.000221103	0.011701
ENSG00000017483	2.86594	2.86794	2.7921	0.000224913	0.0118581
ENSG00000162804	2.86412	2.86454	5.03706	0.000230545	0.0121096
ENSG00000011028	1.40982	1.40983	8.58206	0.000233438	0.012216
ENSG00000204291	3.24219	3.24277	4.9609	0.000234339	0.0122177
ENSG00000196154	2.73561	2.73725	2.94325	0.000238318	0.0123794
ENSG00000135362	-1.58012	-1.58045	4.31997	0.000240629	0.0124311
ENSG00000180801	1.22427	1.22431	6.73377	0.000241081	0.0124311
ENSG00000179862	2.74673	2.75214	1.25915	0.000247404	0.0127106
ENSG00000113645	-1.29668	-1.29678	5.59601	0.000248922	0.0127421
ENSG00000130429	1.31814	1.31828	4.93914	0.000250209	0.0127507
ENSG00000278817	-1.81076	-1.81681	0.462294	0.000250902	0.0127507
ENSG00000138829	3.72817	3.7284	6.73995	0.000256695	0.0129982
ENSG00000163536	3.25227	3.25261	5.70422	0.000271651	0.0137062
ENSG00000165434	1.62104	1.62111	6.35811	0.000275239	0.0138194
ENSG00000151491	1.21618	1.21621	6.84664	0.000275857	0.0138194
ENSG00000157103	-3.06428	-3.06464	5.89981	0.000277097	0.0138323
ENSG00000143369	2.51575	2.51601	5.38014	0.000279273	0.0138916
ENSG00000169715	2.12176	2.12399	1.89631	0.000285736	0.014163
ENSG00000064666	1.85767	1.85775	6.35183	0.000292815	0.014463
ENSG00000188064	2.98269	2.98312	5.13763	0.000294023	0.0144719
ENSG00000255198	1.45068	1.45144	2.69319	0.000295369	0.0144875
ENSG00000273038	1.80896	1.81049	2.10238	0.000296683	0.0145014
ENSG00000114251	2.40509	2.4054	4.98355	0.000299	0.0145641
ENSG00000130590	-1.20201	-1.20244	3.41098	0.000304839	0.0147973
ENSG00000117385	1.13927	1.13932	6.07666	0.00030822	0.01491
ENSG00000183196	1.8388	1.83895	5.45699	0.000309641	0.0149187
ENSG00000163710	1.75743	1.7579	3.73338	0.00031052	0.0149187
ENSG00000181790	-1.76013	-1.76019	7.20425	0.000315373	0.0151004
ENSG00000103154	-2.14998	-2.15313	1.79212	0.00031931	0.015237
ENSG00000174807	2.85129	2.85297	3.02605	0.000321144	0.0152728
ENSG00000138411	1.98005	1.98176	2.11949	0.000324173	0.0153388
ENSG00000128487	-0.953281	-0.953301	7.44766	0.000324712	0.0153388
ENSG00000164442	1.40928	1.40938	5.65545	0.000325899	0.0153434
ENSG00000178718	1.66729	1.66872	2.04503	0.000348539	0.0163056
ENSG00000101608	1.42117	1.42124	6.09042	0.000348653	0.0163056
ENSG00000144596	-2.94453	-2.94756	2.71765	0.000351758	0.0163964
ENSG00000204131	2.54738	2.54826	3.65044	0.000367156	0.0170576
ENSG00000107957	1.91516	1.9155	4.38398	0.000372113	0.0172104
ENSG00000140092	2.58063	2.58111	4.5676	0.000372891	0.0172104
ENSG00000162493	1.30285	1.30286	8.32258	0.000374165	0.0172128
ENSG00000078549	-2.46138	-2.46144	7.73127	0.000381037	0.0174719
ENSG00000053438	2.92969	2.93146	3.02314	0.000387757	0.0176783
ENSG00000166482	3.31672	3.31683	7.40661	0.000388052	0.0176783
ENSG00000148604	-2.13817	-2.14056	2.16842	0.000392174	0.0178085
ENSG00000137936	1.68373	1.68412	3.92842	0.000398843	0.0180531
ENSG00000164362	-1.74127	-1.74297	2.18536	0.000400388	0.0180649
ENSG00000170390	-1.40333	-1.40336	7.59001	0.000403434	0.0181142
ENSG00000198625	1.68989	1.68999	5.90708	0.000405006	0.0181142
ENSG00000163453	1.65678	1.65685	6.53391	0.00040534	0.0181142
ENSG00000270112	2.04782	2.04952	2.20308	0.00041019	0.0182342
ENSG00000130203	-2.83395	-2.83403	7.80604	0.000411356	0.0182342
ENSG00000160789	1.22008	1.22009	8.6341	0.000411964	0.0182342
ENSG00000132434	-2.42779	-2.42785	7.76068	0.000413206	0.0182342
ENSG00000182218	1.81243	1.81403	2.03915	0.000423289	0.0185819
ENSG00000219438	-1.90942	-1.90961	5.52992	0.000423725	0.0185819
ENSG00000268496	-1.75527	-1.75772	1.67927	0.000426304	0.0186369
ENSG00000007171	2.28434	2.28451	5.80899	0.000429862	0.0187343
ENSG00000128713	1.3938	1.3947	2.37472	0.000433661	0.0188045
ENSG00000253293	2.51817	2.51933	3.22053	0.000434145	0.0188045
ENSG00000158292	1.40692	1.40699	6.0872	0.000449329	0.0194025
ENSG00000185624	0.907245	0.907251	8.80101	0.000470715	0.0202638
ENSG00000236914	1.4498	1.45209	1.12291	0.000473528	0.0203227
ENSG00000148908	2.2066	2.21004	1.36642	0.000481905	0.0206194
ENSG00000140522	-2.61336	-2.61579	2.68016	0.000483628	0.0206304
ENSG00000103740	-2.06906	-2.06969	4.00632	0.000508137	0.0216104
ENSG00000138823	-2.82273	-2.82361	4.36488	0.000513669	0.0217799
ENSG00000173040	1.56088	1.56249	1.7522	0.000515568	0.0217947
ENSG00000225302	1.71935	1.72179	1.33848	0.00052253	0.0220047
ENSG00000153234	1.75392	1.75575	1.78106	0.00052366	0.0220047
ENSG00000150722	-2.69733	-2.70076	2.27465	0.000528601	0.0221209
ENSG00000107796	2.64626	2.64682	4.38905	0.00052957	0.0221209
ENSG00000129244	-1.86182	-1.86185	8.2214	0.00053471	0.0222242
ENSG00000120899	-1.69347	-1.69355	6.54684	0.000535199	0.0222242
ENSG00000248334	-2.11171	-2.11634	1.20236	0.000559806	0.0231776
ENSG00000136059	1.9672	1.97	1.41362	0.000562475	0.0232198
ENSG00000144199	-1.40029	-1.40097	3.03139	0.000571276	0.0234548
ENSG00000183072	-1.96422	-1.96546	2.90721	0.000574127	0.0234548
ENSG00000103381	2.06696	2.0678	3.22022	0.000574128	0.0234548
ENSG00000142694	1.37814	1.37891	2.57292	0.000574831	0.0234548
ENSG00000197457	-1.19428	-1.1943	8.04752	0.000582951	0.0237174
ENSG00000145216	1.46533	1.46547	5.21222	0.000591274	0.0239867
ENSG00000123427	1.82338	1.82376	4.08272	0.000601843	0.0243452
ENSG00000134278	-1.18456	-1.18461	6.49193	0.000609466	0.024583
ENSG00000232818	1.96743	1.96989	1.59229	0.000622494	0.0250367
ENSG00000164690	-3.35684	-3.36123	2.61913	0.000633479	0.0253847
ENSG00000166689	-1.94677	-1.94756	3.5208	0.000636495	0.0253847
ENSG00000166896	2.29696	2.29795	3.22389	0.000636555	0.0253847
ENSG00000197614	4.18122	4.18307	4.1871	0.000651771	0.025918
ENSG00000113209	3.13101	3.13143	5.28938	0.000653754	0.0259237
ENSG00000150995	2.00745	2.00774	4.68981	0.000662494	0.0261964
ENSG00000255150	1.40028	1.40262	1.02508	0.000665368	0.0262364
ENSG00000173947	-1.70063	-1.70204	2.39625	0.000668432	0.0262836
ENSG00000266903	-1.50857	-1.51149	1.11044	0.000681642	0.0267283
ENSG00000105605	-1.3468	-1.34684	6.98099	0.000687113	0.026868
ENSG00000100219	1.11945	1.1195	5.99959	0.000701327	0.0272794
ENSG00000072201	1.908	1.90823	4.90445	0.000701769	0.0272794
ENSG00000224189	1.83	1.83099	2.7494	0.000703448	0.0272794
ENSG00000223802	-1.41993	-1.4203	3.93478	0.000708642	0.0274053
ENSG00000173068	2.36302	2.36441	2.8167	0.000714828	0.0275689
ENSG00000198467	1.26913	1.2692	5.71738	0.000720095	0.0276961
ENSG00000128595	1.00366	1.00366	9.95824	0.000724256	0.0277361
ENSG00000133216	1.56514	1.56521	6.18548	0.000725075	0.0277361
ENSG00000164430	1.43622	1.4369	2.82919	0.000729265	0.0278208
ENSG00000279692	1.44024	1.44277	0.961807	0.000757231	0.0287534
ENSG00000198682	1.90342	1.90514	2.02924	0.000757798	0.0287534
ENSG00000127955	2.41257	2.41291	4.90242	0.000762586	0.0288573
ENSG00000100314	1.99295	1.99795	0.619478	0.000776305	0.0292227
ENSG00000121871	-2.71294	-2.7134	5.18276	0.000776393	0.0292227
ENSG00000074590	1.73403	1.73416	5.60091	0.000786159	0.0295114
ENSG00000255874	2.21282	2.21435	2.51696	0.000788716	0.0295286
ENSG00000262209	-2.8348	-2.83764	2.69129	0.000795665	0.0296391
ENSG00000176842	1.50282	1.50339	3.15009	0.000795878	0.0296391
ENSG00000211584	-1.0825	-1.08262	5.05349	0.000799774	0.0297056
ENSG00000132635	-1.10263	-1.1027	5.80368	0.000812023	0.0300812
ENSG00000169604	0.959068	0.959081	7.91636	0.000826242	0.0305276
ENSG00000198910	2.22542	2.22563	5.35671	0.000830986	0.0305738
ENSG00000129038	2.87048	2.8706	6.7755	0.000831838	0.0305738
ENSG00000166578	1.63558	1.63838	1.05285	0.000837582	0.0306764
ENSG00000144810	2.83913	2.83921	7.26794	0.000838986	0.0306764
ENSG00000037897	1.82012	1.8204	4.51272	0.000857506	0.0312723
ENSG00000143842	1.97361	1.97367	6.91993	0.000870507	0.0316644
ENSG00000159314	1.72676	1.7294	1.23509	0.00087411	0.0317135
ENSG00000072954	-1.28211	-1.28257	3.44473	0.000878976	0.0317379
ENSG00000148204	-1.83403	-1.83416	5.95874	0.00087929	0.0317379
ENSG00000246985	-2.09794	-2.10064	1.94826	0.000884532	0.0318454
ENSG00000167614	-1.60983	-1.60985	8.45893	0.000896325	0.0321877
ENSG00000250538	-2.92255	-2.92671	2.24202	0.000911917	0.0326643
ENSG00000184254	3.19119	3.19802	1.35541	0.000916234	0.0327356
ENSG00000183853	1.3215	1.32152	7.65514	0.00092025	0.0327959
ENSG00000127920	1.81645	1.81651	6.86965	0.000925254	0.0328909
ENSG00000115414	2.8139	2.81392	9.89486	0.000943863	0.0334414
ENSG00000169129	2.04424	2.04486	3.64488	0.000945491	0.0334414
ENSG00000162772	1.50894	1.50919	4.37883	0.000955842	0.0337228
ENSG00000196517	-2.34328	-2.34349	5.93505	0.000980606	0.03451
ENSG00000072682	1.6821	1.68239	4.32041	0.000986143	0.0346183
ENSG00000254681	-1.98298	-1.98602	1.64828	0.000993092	0.0347755
ENSG00000168913	-1.67833	-1.67927	2.94969	0.00101166	0.0353378
ENSG00000205364	1.59554	1.59871	0.83664	0.00102834	0.0358314
ENSG00000135446	1.73266	1.73268	7.83039	0.00103194	0.0358658
ENSG00000168542	4.12621	4.12633	7.97125	0.00103442	0.0358658
ENSG00000114812	2.96378	2.96443	4.50195	0.00103789	0.0358814
ENSG00000119711	-1.0588	-1.05886	6.07757	0.00103997	0.0358814
ENSG00000186523	-1.34006	-1.34266	1.05867	0.00107324	0.0369389
ENSG00000154898	-1.44352	-1.44625	1.12091	0.00109013	0.0374285
ENSG00000166562	-1.08633	-1.08642	5.48603	0.00109482	0.0374982
ENSG00000204681	-1.74675	-1.74687	5.97719	0.00110727	0.0377664
ENSG00000113070	1.31669	1.31678	5.54318	0.00110985	0.0377664
ENSG00000197584	2.66442	2.66747	1.99457	0.00111136	0.0377664
ENSG00000227051	2.00533	2.00542	6.41805	0.00111401	0.0377664
ENSG00000021300	-1.20661	-1.20666	6.63054	0.00111606	0.0377664
ENSG00000133401	1.9029	1.90412	2.52367	0.00112145	0.0378578
ENSG00000002586	1.3616	1.36162	8.13813	0.00114456	0.0385455
ENSG00000100320	0.933937	0.933954	7.42986	0.00118648	0.0398617
ENSG00000186007	1.61988	1.62222	1.28997	0.00121503	0.0407238
ENSG00000071073	1.31382	1.31394	5.1326	0.00122513	0.0409648
ENSG00000147650	1.0339	1.03396	5.71196	0.0012388	0.0413133
ENSG00000186998	1.47807	1.47824	4.90818	0.00124142	0.0413133
ENSG00000185238	-0.918144	-0.918213	5.58275	0.00124539	0.0413475
ENSG00000124942	1.83907	1.8391	7.83534	0.00125377	0.0413616
ENSG00000100918	1.72827	1.72849	4.78479	0.00125415	0.0413616
ENSG00000111783	-1.60266	-1.60278	5.72134	0.00125463	0.0413616
ENSG00000036672	-1.11453	-1.11491	3.46937	0.00127663	0.0419885
ENSG00000250802	-1.33961	-1.34165	1.40019	0.00128038	0.0420139
ENSG00000071205	1.74493	1.74576	2.88866	0.00128952	0.0421148
ENSG00000101665	1.64983	1.65082	2.55151	0.00129163	0.0421148
ENSG00000082126	2.09747	2.09909	2.32255	0.00129243	0.0421148
ENSG00000172935	2.51966	2.52462	1.16242	0.00129663	0.0421541
ENSG00000158747	1.99898	2.0002	2.62388	0.00130126	0.0422068
ENSG00000170876	0.994498	0.994522	7.01465	0.00131046	0.0424076
ENSG00000126778	1.86971	1.87004	4.36442	0.00132743	0.0428583
ENSG00000139266	2.05195	2.05205	6.21471	0.00133773	0.0430472
ENSG00000141540	-1.28945	-1.28961	5.03896	0.00133939	0.0430472
ENSG00000165478	-1.69622	-1.69632	6.15533	0.00135261	0.043373
ENSG00000140067	-2.32543	-2.32638	3.69732	0.00135843	0.0434604
ENSG00000138639	2.45101	2.45357	2.02919	0.00138238	0.0441265
ENSG00000088881	-1.27903	-1.27918	5.07532	0.00139951	0.0445058
ENSG00000133816	1.76277	1.76304	4.52987	0.00140425	0.0445058
ENSG00000072110	1.18356	1.18358	7.89939	0.00140629	0.0445058
ENSG00000100979	-1.23263	-1.23265	7.65329	0.00140691	0.0445058
ENSG00000196422	-1.16874	-1.16885	5.24208	0.00141393	0.0446277
ENSG00000114646	-1.75984	-1.7599	7.07346	0.00142882	0.0449967
ENSG00000225151	-1.31482	-1.31793	0.771232	0.00143947	0.0452308
ENSG00000135452	1.82904	1.82913	6.17946	0.00144863	0.0454174
ENSG00000135439	2.82783	2.82795	6.84182	0.00147128	0.0460249
ENSG00000217236	2.18469	2.18659	2.18321	0.00147478	0.0460322
ENSG00000155090	0.920515	0.920583	5.4264	0.00149338	0.0465095
ENSG00000105996	2.66439	2.66608	2.82809	0.0015093	0.0468376
ENSG00000137959	-2.55894	-2.55984	4.03798	0.00151536	0.0468376
ENSG00000152128	-2.25474	-2.25664	2.63295	0.00151669	0.0468376
ENSG00000165113	-1.38408	-1.38522	2.28722	0.00151722	0.0468376
ENSG00000151490	2.54925	2.54957	5.11031	0.0015455	0.047606
ENSG00000204682	1.55675	1.55726	3.3638	0.0015571	0.0478587
ENSG00000168917	1.15215	1.15233	4.3853	0.0015875	0.0486281
ENSG00000128604	-2.01325	-2.01638	1.6433	0.00158904	0.0486281
ENSG00000243244	1.19225	1.19255	3.65962	0.00161135	0.0492039
ENSG00000135406	1.43985	1.44306	0.63148	0.00161798	0.0492993
ENSG00000135549	1.75059	1.75072	5.54759	0.00162168	0.0493053
ENSG00000261934	-2.05988	-2.06037	4.35358	0.0016362	0.0496396
ENSG00000185567	2.00139	2.0015	6.07171	0.00164462	0.0497879

## Sheet: Figure 3G
DEGs Identified when comparing bias vs unbias GICs from the HGCC
	logFC	AveExpr	t	P.Value	adj.P.Val	B
FSTL1	1.72138	10.6988	11.1931	7.21951e-10	1.72063e-05	12.3028
BNC2	1.67356	6.40366	9.95075	5.04818e-09	3.29956e-05	10.6122
ZFPM2	0.885968	5.75324	9.80619	6.40018e-09	3.29956e-05	10.4024
COL6A2	1.58247	9.00861	9.74195	7.11747e-09	3.29956e-05	10.3082
RUNX2	2.29047	7.83486	9.73716	7.17409e-09	3.29956e-05	10.3012
EDIL3	5.17348	7.91929	9.64901	8.3067e-09	3.29956e-05	10.171
TTC39B	0.937332	5.66844	9.28393	1.53929e-08	4.63602e-05	9.62029
GBP1P1	1.40099	5.96209	9.27756	1.55617e-08	4.63602e-05	9.61052
CLMP	2.94998	7.98009	9.05295	2.29304e-08	6.07222e-05	9.2621
GBP1	2.64133	8.39053	8.83104	3.38368e-08	8.06189e-05	8.91069
TGFBI	3.70941	9.30279	8.77738	3.72092e-08	8.06189e-05	8.82463
OLIG2	-2.07936	7.81356	-8.64304	4.72757e-08	9.38935e-05	8.60732
CASP4	1.94019	6.50473	8.38506	7.53604e-08	0.000138159	8.18244
GBP2	2.70415	6.92871	8.18068	1.09704e-07	0.000175568	7.83871
SYNC	0.995049	7.86187	8.17678	1.10499e-07	0.000175568	7.83209
FAM114A1	1.88269	8.79135	8.1256	1.21499e-07	0.000179454	7.745
SEC11C	-1.3199	7.11125	-8.09756	1.28004e-07	0.000179454	7.6971
AIM1	3.19538	7.05008	8.01903	1.48213e-07	0.000194078	7.56235
AHNAK	1.47939	8.48356	7.99056	1.56334e-07	0.000194078	7.51326
KCNA2	-2.0317	6.64116	-7.96876	1.62865e-07	0.000194078	7.47558
DAB2	2.528	7.2272	7.84556	2.05482e-07	0.000233202	7.26131
ARC	-0.713803	7.44483	-7.7835	2.31184e-07	0.000245325	7.15249
GBP3	2.96376	7.78223	7.771	2.36751e-07	0.000245325	7.1305
PSMB9	0.859333	7.12233	7.69395	2.74287e-07	0.000245799	6.99441
FAM125B	-0.792621	7.56528	-7.68698	2.77973e-07	0.000245799	6.98206
PPFIA2	2.80012	6.4669	7.68201	2.80635e-07	0.000245799	6.97324
OLFM1	-1.03278	7.51848	-7.67972	2.81868e-07	0.000245799	6.96918
CHST11	-1.32275	9.32531	-7.6671	2.88775e-07	0.000245799	6.94677
ANKRD20A5P	-1.0146	5.15547	-7.63306	3.0829e-07	0.000246803	6.88622
FOXN2	-1.03656	8.24104	-7.62809	3.11252e-07	0.000246803	6.87736
ANKRD13B	-0.521961	8.09805	-7.61203	3.21021e-07	0.000246803	6.84873
BTN3A3	1.07394	6.97203	7.57886	3.42227e-07	0.000254884	6.78944
ITGBL1	2.79141	7.56796	7.48645	4.093e-07	0.000295602	6.62337
TWIST2	0.967202	6.38456	7.41252	4.72705e-07	0.000331352	6.48955
CITED2	1.11581	9.00655	7.28342	6.08943e-07	0.000407225	6.25386
CARD16	1.55304	5.72339	7.2783	6.15118e-07	0.000407225	6.24446
ST3GAL6	-0.847777	5.60498	-7.26343	6.33433e-07	0.000408016	6.21712
ANKRD20A11P	-1.60673	5.98527	-7.164	7.71241e-07	0.000473309	6.03353
PLP1	-1.1892	5.70849	-7.16187	7.74517e-07	0.000473309	6.02957
MAN1A1	2.98122	7.92279	7.12948	8.2606e-07	0.000480183	5.96942
GFPT2	2.12392	8.39352	7.01685	1.03463e-06	0.000587101	5.75901
LACC1	1.10976	5.61696	6.99323	1.08488e-06	0.000601301	5.71464
KCNQ2	-0.693144	7.14502	-6.97256	1.13093e-06	0.000606675	5.67573
SMG9	-0.671142	8.42763	-6.9662	1.14549e-06	0.000606675	5.66376
LOC100507009	-1.08557	6.5483	-6.94934	1.18507e-06	0.0006117	5.63196
PAWR	2.59989	7.36877	6.93826	1.21184e-06	0.0006117	5.61104
ANKRD20A3	-2.35522	7.09343	-6.93009	1.23197e-06	0.0006117	5.59561
OLIG1	-1.51596	7.50804	-6.89438	1.32416e-06	0.00064115	5.52801
DIP2B	-1.0543	8.81009	-6.87852	1.36735e-06	0.00064115	5.49793
ANKRD20A2	-2.44215	6.91638	-6.87408	1.37969e-06	0.00064115	5.4895
DDR2	2.14791	9.02521	6.86374	1.40891e-06	0.00064115	5.46986
SSH3	0.631753	7.62822	6.85422	1.43639e-06	0.00064115	5.45175
CADM4	-1.36461	9.87739	-6.84865	1.4527e-06	0.00064115	5.44117
ANKRD20A1	-2.53651	7.47329	-6.80736	1.57986e-06	0.000684594	5.36246
ANKRD20A4	-2.51386	7.35739	-6.74085	1.80933e-06	0.00077003	5.23517
DBI	-0.729485	8.92055	-6.70155	1.96083e-06	0.000819866	5.15964
SERPINE1	2.3261	10.4953	6.65228	2.16946e-06	0.000891461	5.06461
SNX9	0.887243	8.83783	6.59779	2.42704e-06	0.000978396	4.9591
AIF1L	-0.971308	6.7633	-6.59064	2.46313e-06	0.000978396	4.94522
BVES	2.62062	6.66548	6.58142	2.51043e-06	0.000980838	4.92732
PLEKHA5	2.1365	7.33585	6.55811	2.63434e-06	0.00101265	4.88198
RALGPS1	-0.67166	6.50275	-6.53707	2.75157e-06	0.00104092	4.84099
TAOK3	-0.936855	8.33593	-6.52589	2.81599e-06	0.00104865	4.8192
TRPM8	-1.67454	5.51806	-6.48477	3.06684e-06	0.00112449	4.73883
CNN2	1.72588	9.60518	6.45668	3.25131e-06	0.00117407	4.68379
OR56B1	1.39553	7.34103	6.44917	3.30253e-06	0.00117476	4.66906
NRP1	1.84848	8.82401	6.43506	3.40105e-06	0.001182	4.64135
IRF1	0.845137	6.72389	6.43211	3.42205e-06	0.001182	4.63555
CASP1	1.50033	5.83647	6.42339	3.48483e-06	0.00118649	4.61841
GAB2	-0.847524	7.50414	-6.41082	3.57745e-06	0.00120086	4.59368
FAM181B	-1.89645	7.0989	-6.39997	3.65942e-06	0.00121132	4.57232
LOC100144603	-0.700419	6.72303	-6.3889	3.74502e-06	0.00122267	4.55051
COL1A2	3.89429	9.54887	6.37388	3.86455e-06	0.00124465	4.52088
LPL	-1.91953	7.94224	-6.36644	3.92518e-06	0.00124732	4.50619
C3orf70	-2.17946	7.34144	-6.34537	4.1023e-06	0.00128281	4.46455
EMILIN1	0.506608	7.79566	6.33821	4.16432e-06	0.00128281	4.45039
ZDHHC22	-1.10633	6.51788	-6.33433	4.19836e-06	0.00128281	4.44271
FGFBP3	-1.93113	7.72198	-6.31215	4.39846e-06	0.00132694	4.39876
MYO9B	-0.541645	8.91187	-6.28283	4.6781e-06	0.00138305	4.34056
ANKRD20A8P	-1.5976	6.2223	-6.28056	4.70049e-06	0.00138305	4.33606
SDC2	1.59683	8.39504	6.25104	5.00201e-06	0.00144031	4.27733
VPS13C	-0.928871	8.35341	-6.24972	5.01598e-06	0.00144031	4.2747
BTN3A1	1.01378	7.77855	6.22776	5.25383e-06	0.00148163	4.23093
AXL	1.9785	9.06204	6.22503	5.2842e-06	0.00148163	4.22548
MAP2	-2.14814	9.10652	-6.2089	5.46734e-06	0.0015087	4.19329
RARRES3	1.38666	7.1869	6.2035	5.5301e-06	0.0015087	4.1825
CAV1	2.55044	8.90633	6.16281	6.02756e-06	0.0016141	4.10108
LOXL1	1.35823	8.39166	6.15209	6.16607e-06	0.00163284	4.07959
NNMT	1.69124	6.5721	6.13997	6.32668e-06	0.00165696	4.05528
LOX	3.32788	8.87385	6.12861	6.48123e-06	0.00167899	4.03245
PPL	0.604184	7.09658	6.11698	6.64336e-06	0.00170249	4.00908
PTCHD2	-0.542049	6.60871	-6.10999	6.74276e-06	0.00170958	3.99503
COL1A1	2.72358	9.1451	6.08045	7.18026e-06	0.0017642	3.93555
KCNJ10	-2.72776	7.63414	-6.06656	7.39585e-06	0.00179862	3.90755
CD44	1.73973	8.06635	6.05737	7.54223e-06	0.00180693	3.889
LOC100505794	1.11331	6.62433	6.05493	7.58165e-06	0.00180693	3.88407
NT5DC1	2.15451	7.02509	6.03744	7.87006e-06	0.0018571	3.84873
SOGA1	-0.629706	8.32691	-6.02076	8.1555e-06	0.0018973	3.815
MOB3C	0.525112	6.93999	6.01823	8.19962e-06	0.0018973	3.80989
BCAN	-3.02784	8.19545	-5.99777	8.56652e-06	0.00195303	3.76844
MFAP4	2.66271	9.7231	5.99425	8.63134e-06	0.00195303	3.7613
PCDH1	-0.728685	7.34974	-5.99128	8.68634e-06	0.00195303	3.75528
CFH	3.39541	6.3024	5.94935	9.50336e-06	0.00211523	3.67013
LRRC4B	-1.28924	7.32137	-5.94535	9.58521e-06	0.00211523	3.662
COL6A1	1.51237	9.99359	5.94068	9.68176e-06	0.00211693	3.65251
PALLD	1.2025	9.04269	5.92459	1.00225e-05	0.00213563	3.61973
ATP9B	-0.605054	7.29591	-5.92309	1.00548e-05	0.00213563	3.61668
MYOF	2.53596	8.90357	5.91982	1.01257e-05	0.00213563	3.61002
PCBP4	-0.721212	8.12208	-5.91237	1.02891e-05	0.00214625	3.59485
PAFAH1B3	-0.694879	8.4314	-5.90935	1.03562e-05	0.00214625	3.58869
TRIM21	0.766966	7.04531	5.83185	1.22397e-05	0.00251472	3.43026
MTMR11	0.997212	6.98055	5.80703	1.29144e-05	0.00261304	3.37936
SHC3	-1.86227	8.09891	-5.80239	1.30445e-05	0.00261304	3.36985
RNF180	-1.3004	7.74568	-5.8003	1.31039e-05	0.00261304	3.36554
LOC100506343	-0.798888	6.83467	-5.79728	1.31898e-05	0.00261304	3.35934
PARP14	1.33786	8.03896	5.79187	1.33451e-05	0.00261304	3.34824
TIFA	1.25811	5.8211	5.7908	1.3376e-05	0.00261304	3.34604
TAP1	0.676124	7.55255	5.78154	1.36471e-05	0.00262137	3.32701
MGC21881	-0.673004	7.42655	-5.77996	1.36939e-05	0.00262137	3.32375
ZNF227	-0.756262	8.14826	-5.77812	1.37487e-05	0.00262137	3.31997
LOC100507463	0.931174	6.52746	5.77418	1.38664e-05	0.00262285	3.31188
SOCS3	0.828442	7.76468	5.76597	1.41154e-05	0.00263334	3.29499
BRSK1	-0.500323	7.39179	-5.76508	1.41429e-05	0.00263334	3.29314
ARPC1B	0.687967	8.71637	5.74804	1.46754e-05	0.00269045	3.25807
COL5A2	2.10813	8.61386	5.74105	1.49e-05	0.00270392	3.24366
GPR19	-0.876793	4.78271	-5.73871	1.49758e-05	0.00270392	3.23884
TRAF4	-0.688875	7.64941	-5.72252	1.55118e-05	0.00275891	3.20546
ENPP1	2.65724	7.1377	5.71127	1.58961e-05	0.00280631	3.18222
VCL	1.24927	10.1195	5.6999	1.62942e-05	0.00285544	3.15874
NSUN7	1.13847	4.54448	5.69132	1.66014e-05	0.00288804	3.14101
TET1	-0.889688	7.21648	-5.68569	1.6806e-05	0.00290244	3.12938
EPHB3	-1.02396	7.96609	-5.67726	1.71174e-05	0.00292029	3.11194
ATP2B4	1.25038	9.17292	5.67627	1.71544e-05	0.00292029	3.10989
RUNX1T1	1.08779	6.9857	5.66796	1.74681e-05	0.00293077	3.09269
PDE4B	-1.52605	7.06279	-5.66706	1.75025e-05	0.00293077	3.09082
TMEM178B	-1.5319	7.37693	-5.6649	1.75849e-05	0.00293077	3.08636
ZNF780A	-0.534508	6.7587	-5.65953	1.77922e-05	0.00294007	3.07523
ADAMTS3	-2.50375	6.4877	-5.65708	1.78874e-05	0.00294007	3.07016
TMEM206	-0.723105	6.90652	-5.64775	1.82554e-05	0.00298001	3.05082
B4GALT1	1.48458	8.71885	5.63521	1.8762e-05	0.00304186	3.02482
TAP2	0.824461	8.05295	5.62425	1.92163e-05	0.00309448	3.00209
PSMB8	0.666318	7.27668	5.57045	2.16171e-05	0.00339027	2.89024
CITED1	-1.02696	6.9294	-5.57035	2.16222e-05	0.00339027	2.89001
GAN	-0.718237	7.32033	-5.55581	2.23222e-05	0.00347716	2.85973
SFRP2	1.67622	6.13125	5.55281	2.24693e-05	0.00347734	2.85349
TRIM24	-0.897862	9.41656	-5.5364	2.3293e-05	0.00358157	2.81927
TMEM14C	0.598826	8.85336	5.51301	2.45209e-05	0.00374424	2.77044
TIMP4	-2.35789	7.93886	-5.51034	2.46652e-05	0.00374424	2.76486
CSF1	1.24263	8.75161	5.50118	2.51671e-05	0.00378813	2.74571
PARP12	1.15369	7.35041	5.49928	2.52722e-05	0.00378813	2.74175
TSPAN7	-1.65016	7.68507	-5.49046	2.57675e-05	0.00383804	2.7233
TMEM145	-1.34034	6.67594	-5.48765	2.59272e-05	0.00383804	2.71742
BICC1	2.1944	8.00382	5.47348	2.6749e-05	0.00391033	2.68775
ZFP30	-0.824154	7.36647	-5.47148	2.68666e-05	0.00391033	2.68358
ITM2C	-0.686013	9.34333	-5.47079	2.69079e-05	0.00391033	2.68212
MRPS18A	-0.642372	7.5692	-5.46245	2.74068e-05	0.00394044	2.66465
BTN3A2	0.966449	8.20142	5.4618	2.74457e-05	0.00394044	2.6633
MVP	1.1925	7.82901	5.45151	2.80751e-05	0.00397763	2.64174
SOX8	-1.1824	8.14149	-5.44732	2.83355e-05	0.00397763	2.63296
TLK1	-0.682865	8.159	-5.44137	2.87099e-05	0.00397763	2.62048
MYO10	-0.640863	8.97376	-5.43978	2.88112e-05	0.00397763	2.61713
NOVA1	-1.71064	6.81931	-5.43673	2.90056e-05	0.00397763	2.61073
COL8A1	2.61595	7.50191	5.4365	2.90201e-05	0.00397763	2.61026
PTGR1	1.20937	7.71004	5.43619	2.90399e-05	0.00397763	2.60961
CACNA2D1	2.42944	7.76712	5.41674	3.0314e-05	0.00411641	2.56877
MAP3K1	-1.68379	8.2695	-5.41547	3.03985e-05	0.00411641	2.56612
CYBASC3	0.572632	7.30496	5.39998	3.14573e-05	0.00420025	2.53356
CD109	2.53821	7.60999	5.39972	3.14753e-05	0.00420025	2.53301
MAP2K5	-1.2201	7.2895	-5.3987	3.15464e-05	0.00420025	2.53086
FAT3	-1.61657	6.92504	-5.3878	3.23157e-05	0.00427878	2.50794
EEF1A2	-0.838545	8.11626	-5.36901	3.36871e-05	0.00439095	2.4684
FAT4	1.79407	6.24674	5.35759	3.45492e-05	0.00444568	2.44436
MIMT1	-0.855999	4.31718	-5.35568	3.46955e-05	0.00444568	2.44034
SARS2	-0.549122	7.4438	-5.34141	3.58103e-05	0.00452276	2.41025
ICAM1	1.1457	7.27814	5.34096	3.58457e-05	0.00452276	2.40931
SH2D4A	0.944925	6.45447	5.3407	3.58663e-05	0.00452276	2.40876
LEPROTL1	-0.539554	8.07273	-5.32886	3.68201e-05	0.00461752	2.38379
KIAA1522	0.517627	7.71161	5.3266	3.70053e-05	0.00461752	2.37902
MDFIC	1.2927	8.01	5.30513	3.88104e-05	0.00481755	2.33369
TSPAN2	1.55685	5.66178	5.29963	3.92877e-05	0.00485152	2.32206
MANEAL	-0.660963	7.66035	-5.2846	4.06206e-05	0.00493934	2.2903
IL15	0.750697	3.73833	5.28111	4.09369e-05	0.00495253	2.28292
RHOBTB1	0.959554	7.3856	5.27783	4.12364e-05	0.00496357	2.27598
C1orf21	-1.03344	7.18739	-5.2696	4.19977e-05	0.00499238	2.25857
PPP1R1C	-0.787423	4.53343	-5.26847	4.21041e-05	0.00499238	2.25616
SLC6A1	-0.74175	4.91558	-5.26453	4.24739e-05	0.00500186	2.24784
ZNF431	-0.731991	8.79039	-5.26316	4.26038e-05	0.00500186	2.24493
SLIT1	-1.6475	6.84118	-5.26067	4.28407e-05	0.00500501	2.23966
PLSCR4	1.34619	7.07888	5.249	4.39671e-05	0.00509114	2.21495
ATF7IP	-0.501938	10.1826	-5.24861	4.40052e-05	0.00509114	2.21413
2003-09-01	-2.08155	8.17178	-5.23461	4.53986e-05	0.00520185	2.18445
CALD1	1.01348	10.1441	5.22251	4.66391e-05	0.00531842	2.15879
PRDM8	0.838971	6.20857	5.2139	4.75424e-05	0.00539561	2.14053
CYP1B1	0.795874	6.1011	5.20481	4.85155e-05	0.00546001	2.12124
P2RX7	-1.65543	7.25175	-5.19902	4.91463e-05	0.00549908	2.10894
BICD1	-0.914407	8.11988	-5.19617	4.94597e-05	0.00550829	2.10288
C4orf34	0.782152	8.55829	5.1901	5.01338e-05	0.00554863	2.09
SIPA1L3	-0.576095	8.04601	-5.18873	5.02876e-05	0.00554863	2.08708
CTF1	0.504418	8.16569	5.18168	5.10851e-05	0.00558492	2.0721
REV3L	-0.681084	5.8935	-5.1765	5.16782e-05	0.00562395	2.06111
TMEM26	0.941558	5.12964	5.17409	5.1957e-05	0.0056286	2.05598
PSTPIP2	1.42892	6.00747	5.16994	5.24412e-05	0.00565535	2.04715
MGC24103	1.3709	4.20132	5.15011	5.48171e-05	0.00585855	2.00496
JPH2	0.755617	6.27782	5.14636	5.52782e-05	0.00588145	1.99698
UNC13A	-1.43705	6.94929	-5.13964	5.61145e-05	0.00591759	1.98268
RCN1	0.531981	9.04114	5.13745	5.63904e-05	0.00591964	1.97801
SCG3	-3.16714	6.05249	-5.12994	5.73451e-05	0.00592418	1.96203
IFI35	0.874638	7.69582	5.12936	5.74197e-05	0.00592418	1.96079
RNF157	-0.932306	7.08747	-5.12716	5.7703e-05	0.00592774	1.9561
OPTN	1.11	7.56598	5.12114	5.84855e-05	0.00596654	1.94327
TLR3	1.50475	6.20539	5.1204	5.85823e-05	0.00596654	1.9417
PTN	-1.07904	11.1053	-5.11059	5.98826e-05	0.00602186	1.92079
BAG2	1.3796	7.60894	5.10662	6.04179e-05	0.00602486	1.91231
PHYHIPL	-1.82794	6.74391	-5.10278	6.09394e-05	0.00603416	1.90413
EVC2	0.847179	6.01398	5.10205	6.10387e-05	0.00603416	1.90258
LOC148189	-0.57938	6.90076	-5.09874	6.14929e-05	0.00603416	1.89552
PDCD1LG2	2.19048	7.1246	5.09852	6.1524e-05	0.00603416	1.89504
BCL7A	-0.920591	7.63953	-5.08079	6.40178e-05	0.00625302	1.85719
NABP1	1.82073	7.1059	5.07866	6.43229e-05	0.00625718	1.85266
CDC42EP3	1.15204	7.98469	5.07323	6.5111e-05	0.0063081	1.84106
LOC554249	-0.753231	7.75497	-5.06958	6.56464e-05	0.00633293	1.83327
TAPBP	0.770727	9.35453	5.06787	6.58988e-05	0.00633293	1.82961
SH3TC2	-0.561137	5.80468	-5.05215	6.82644e-05	0.00653391	1.79602
ZNF562	-0.66458	8.93084	-5.02813	7.20472e-05	0.00681505	1.74465
RNY1	-0.909304	10.6731	-5.02805	7.20594e-05	0.00681505	1.74448
PHLPP1	-1.18982	8.67555	-5.02543	7.24848e-05	0.00681856	1.73888
MLXIP	-0.657235	7.96031	-5.0243	7.26688e-05	0.00681856	1.73646
ALPK1	1.21667	5.56916	5.0212	7.31778e-05	0.0068394	1.72981
RYR3	-2.04243	5.92501	-5.01789	7.37241e-05	0.00686354	1.72273
GNG4	-1.29592	7.1625	-5.01571	7.40846e-05	0.00687027	1.71808
PDGFD	2.43922	7.49058	5.01062	7.4938e-05	0.00689977	1.70717
HIP1R	-0.521144	7.65579	-5.01036	7.49818e-05	0.00689977	1.70662
TPCN1	1.04724	7.971	5.00719	7.55175e-05	0.00692234	1.69983
COL21A1	2.65756	7.36783	4.99951	7.68339e-05	0.00701603	1.68337
LOC100507164	0.751429	3.57593	4.9928	7.80014e-05	0.00709545	1.669
CAST	1.08371	9.10003	4.98119	8.00648e-05	0.00725546	1.64413
KITLG	1.66054	7.21794	4.97225	8.16927e-05	0.00737493	1.62496
SMARCD1	-0.582428	8.51036	-4.96516	8.3007e-05	0.00742155	1.60975
EFR3A	1.04714	8.43947	4.9638	8.32612e-05	0.00742155	1.60684
FLNC	1.50801	8.19997	4.96277	8.34546e-05	0.00742155	1.60463
MIR22HG	1.03883	7.53039	4.95691	8.4565e-05	0.00746459	1.59204
NDRG2	-0.704733	7.58352	-4.93725	8.83934e-05	0.00774663	1.54986
UQCRFS1	-0.505003	7.75697	-4.93717	8.84104e-05	0.00774663	1.54967
PRR4	-0.73621	6.81049	-4.92542	9.07841e-05	0.00785243	1.52443
SMARCB1	-0.615152	8.5776	-4.92439	9.09953e-05	0.00785243	1.52222
TGFBR2	1.99455	8.55214	4.92414	9.10456e-05	0.00785243	1.52169
PPP1R14C	-1.80518	6.54452	-4.9227	9.13419e-05	0.00785243	1.51859
THBS1	2.72008	10.6384	4.92148	9.15946e-05	0.00785243	1.51596
GXYLT2	1.62448	8.44583	4.9186	9.21904e-05	0.00786626	1.50979
HIST1H4A	-0.86183	6.89335	-4.9171	9.25026e-05	0.00786626	1.50656
GNG7	-1.17469	7.74862	-4.91288	9.33875e-05	0.00786626	1.49749
MIR4521	-1.62876	7.10375	-4.91222	9.35276e-05	0.00786626	1.49607
GPC4	1.16031	9.08464	4.91123	9.37363e-05	0.00786626	1.49394
CNTFR	-1.43771	7.83553	-4.90943	9.41173e-05	0.00787052	1.49008
CCDC97	-0.56706	8.60103	-4.90425	9.52235e-05	0.00793518	1.47894
FAM5B	-1.09282	6.83223	-4.89971	9.62057e-05	0.00796135	1.46917
C2orf72	-0.750248	6.62655	-4.89424	9.74002e-05	0.00799374	1.45741
ZNF253	-0.886551	8.73301	-4.89355	9.75528e-05	0.00799374	1.45592
SGMS2	1.23418	6.60579	4.89188	9.79197e-05	0.00799374	1.45234
ZNF879	-0.568402	7.03926	-4.88402	9.96747e-05	0.00799374	1.43542
GBP5	0.793606	5.10789	4.88042	0.000100488	0.00799374	1.42768
RNU12	-0.562729	6.26782	-4.87999	0.000100585	0.00799374	1.42676
OSMR	1.14692	8.9266	4.87991	0.000100603	0.00799374	1.42659
ATP8B1	2.25975	6.31931	4.87976	0.000100638	0.00799374	1.42626
LOC400590	1.2987	7.37052	4.87771	0.000101105	0.00799374	1.42185
LDLRAD3	-1.08037	10.403	-4.87763	0.000101122	0.00799374	1.42168
ALPK2	2.63247	6.59842	4.87608	0.000101477	0.00799374	1.41835
EFEMP2	0.904768	11.0195	4.87533	0.000101651	0.00799374	1.41671
TPBG	1.7711	6.87329	4.87436	0.000101874	0.00799374	1.41463
GEM	1.48561	8.24553	4.87102	0.000102644	0.00800268	1.40745
ZNF829	-0.678396	6.57506	-4.87057	0.000102749	0.00800268	1.40648
DSE	0.564436	5.75704	4.86428	0.00010422	0.00807245	1.39294
KCNF1	-0.910695	7.29338	-4.86384	0.000104322	0.00807245	1.392
KSR1	-0.542056	7.52994	-4.85778	0.000105763	0.00815743	1.37893
LAYN	2.21773	8.12995	4.85481	0.000106474	0.00818092	1.37255
SYT1	1.72726	6.92394	4.85365	0.000106754	0.00818092	1.37005
CCDC6	0.517726	9.25072	4.8478	0.000108176	0.00826331	1.35744
PLOD2	1.12738	9.28383	4.84251	0.000109478	0.00828316	1.34604
ZNF317	-0.504458	8.58688	-4.83864	0.00011044	0.00832945	1.33771
ALK	-1.03374	6.83212	-4.82906	0.000112859	0.00848505	1.31706
RASGRP3	1.39573	5.5308	4.82297	0.000114425	0.0085322	1.30394
ZMYND8	-0.824973	8.37948	-4.82245	0.00011456	0.0085322	1.30281
ATAD2B	-0.694935	6.81438	-4.81507	0.00011649	0.00864007	1.28689
CSPG5	-0.805409	7.05948	-4.81155	0.000117423	0.00864951	1.27929
FAM212B	-0.594261	6.61078	-4.81093	0.000117587	0.00864951	1.27796
SPTLC3	2.38763	7.08457	4.80797	0.000118378	0.00868094	1.27157
DDX60	1.31744	6.57092	4.8015	0.000120125	0.00872123	1.25761
ZNF230	-0.547149	6.46699	-4.79946	0.00012068	0.00872123	1.25322
ZNF17	-0.614379	7.92647	-4.79933	0.000120717	0.00872123	1.25293
TTYH1	-1.24253	8.63043	-4.79626	0.00012156	0.00874162	1.2463
MXRA5	2.49227	7.44008	4.79251	0.000122594	0.00876877	1.23823
ATP13A4	-1.52484	4.73468	-4.79125	0.000122945	0.00876877	1.2355
GLT8D2	1.96265	6.67589	4.78245	0.000125421	0.00882028	1.21651
SNTB1	-0.921666	7.59447	-4.78127	0.000125757	0.00882028	1.21396
CAMK2A	-1.13568	7.05861	-4.78014	0.00012608	0.00882028	1.21151
TSPAN9	0.839473	6.81402	4.77762	0.000126804	0.00883121	1.20606
WSCD1	-1.84916	8.10809	-4.7766	0.000127097	0.00883121	1.20386
EYA2	-1.1635	5.91856	-4.77443	0.000127722	0.00884886	1.19919
RHOQ	-0.57375	8.47514	-4.77109	0.000128693	0.00886145	1.19197
PANK3	-0.56219	9.24765	-4.77012	0.000128977	0.00886145	1.18987
ZNF260	-0.716044	7.48759	-4.76997	0.00012902	0.00886145	1.18956
SEC24D	1.08788	7.95314	4.76864	0.00012941	0.00886273	1.18668
SOX6	-1.64656	6.96142	-4.76476	0.000130554	0.00888999	1.17829
TSHZ3	0.80878	8.23993	4.76158	0.000131499	0.00891398	1.17143
PPAP2B	-1.02089	9.32403	-4.75981	0.000132029	0.00891398	1.16759
KCNT2	1.26675	5.00126	4.7562	0.000133113	0.00895323	1.1598
ST8SIA4	2.64512	6.62663	4.75538	0.000133361	0.00895323	1.15803
SLCO4A1	-0.581754	6.64248	-4.7528	0.000134143	0.00896984	1.15246
DKK3	1.2933	10.109	4.75201	0.000134385	0.00896984	1.15074
PPP2R2B	-1.11629	5.49994	-4.75085	0.000134738	0.00896984	1.14824
RRAS	1.5994	8.85607	4.74581	0.000136287	0.00904772	1.13735
ZNF426	-0.505377	8.69253	-4.73392	0.000140013	0.00924358	1.11165
CMTM5	-1.00381	6.54014	-4.73135	0.000140835	0.00927215	1.10608
SNORD35B	-0.694227	7.64021	-4.72733	0.000142123	0.00930556	1.0974
LUM	2.79615	5.28668	4.7207	0.000144279	0.00942085	1.08305
LAMB1	1.58567	9.42863	4.71392	0.000146518	0.00954088	1.06839
MET	2.43176	7.42064	4.70637	0.000149053	0.00964581	1.05204
GRIA2	-2.76255	7.20651	-4.7013	0.000150781	0.00970696	1.04106
GLDC	-2.19221	7.8471	-4.70035	0.000151105	0.00970696	1.03902
TWIST1	0.799023	6.93225	4.69718	0.000152197	0.0097247	1.03216
APC	-1.03938	8.89223	-4.6953	0.000152849	0.00973363	1.02808
NCEH1	1.40626	7.21699	4.69188	0.00015404	0.00973363	1.02069
LY75	1.38777	5.7874	4.69182	0.000154061	0.00973363	1.02056
EFEMP1	2.07744	8.98827	4.69092	0.000154379	0.00973363	1.0186
SHC2	-0.655923	7.49755	-4.68206	0.000157518	0.00987171	0.999417
PEG3	-1.28431	5.46668	-4.68017	0.000158196	0.00987171	0.99533
BMP7	-1.43359	7.59658	-4.67765	0.000159103	0.00987171	0.989881
CTGF	2.30374	9.9248	4.67635	0.000159574	0.00987171	0.987063
DPRXP4	0.665831	4.56304	4.67437	0.000160297	0.00987171	0.98276
LOC729080	-0.548026	7.11663	-4.67235	0.000161035	0.00989159	0.978385
OMD	2.72829	4.9017	4.66771	0.000162743	0.00993952	0.968333
ARL8A	-0.577413	8.8134	-4.66413	0.000164073	0.00997539	0.960578
TLR6	1.45919	4.75631	4.66045	0.000165452	0.00998738	0.952607
MARK1	-0.956853	7.1161	-4.66025	0.000165527	0.00998738	0.95217
CRMP1	-0.986168	9.1067	-4.65376	0.000167987	0.0100869	0.938119
ZNF675	-0.818809	7.88981	-4.65367	0.000168023	0.0100869	0.937918
SDC4	1.92535	9.31144	4.65137	0.000168903	0.0101142	0.932941
ZNF460	-0.527203	9.19899	-4.6491	0.000169779	0.0101412	0.92801
STK39	-0.663946	8.47901	-4.64563	0.000171122	0.0101959	0.920504
SAMD9L	1.89499	9.14698	4.64282	0.000172224	0.0102359	0.914392
FN1	2.60015	10.2561	4.63951	0.000173523	0.010262	0.907235
VASN	1.18803	7.25606	4.63523	0.000175223	0.0103157	0.897947
CLASP2	-0.840856	7.64621	-4.63427	0.000175606	0.0103157	0.895867
GPR1	1.20153	5.48908	4.62742	0.000178366	0.0104447	0.881009
DTX3L	0.936243	8.40435	4.62462	0.000179506	0.0104601	0.87494
CLEC2B	2.42116	5.28675	4.62339	0.00018001	0.0104633	0.87227
DDX39A	-0.538217	8.66726	-4.6199	0.000181445	0.010496	0.86471
ECM2	1.23033	5.43403	4.61862	0.000181975	0.0105012	0.861928
SLC7A11	0.708081	6.36315	4.61621	0.000182975	0.0105334	0.85671
ELF4	1.14517	6.94747	4.61183	0.000184811	0.010588	0.847197
GCFC1	-0.510608	6.75224	-4.58456	0.000196659	0.0110817	0.788013
SP100	1.32326	6.70723	4.5845	0.000196684	0.0110817	0.787893
DNAJC4	0.617109	8.21317	4.57969	0.000198854	0.0111512	0.777442
SLC50A1	0.514481	7.79648	4.57077	0.000202937	0.0113494	0.758083
ARID5B	0.929761	9.49835	4.56755	0.000204431	0.0113494	0.751095
SPATA5L1	-0.772212	6.59457	-4.56704	0.000204671	0.0113494	0.749977
SIRT2	-0.507459	8.33723	-4.56658	0.000204884	0.0113494	0.74899
ZNF121	-0.611269	8.75706	-4.56498	0.000205636	0.0113494	0.7455
POLD4	0.53964	7.72289	4.55925	0.000208341	0.0114213	0.733054
MIR3676	-0.659628	6.74301	-4.55872	0.00020859	0.0114213	0.731916
UBA7	0.8781	7.90587	4.55783	0.000209014	0.0114213	0.729983
DCBLD2	1.51616	10.1417	4.55698	0.000209419	0.0114213	0.728136
NMI	0.843318	6.50307	4.55054	0.00021252	0.0114593	0.714137
GAS7	-1.657	8.09935	-4.54828	0.000213618	0.0114925	0.70923
RNF150	1.03397	7.16266	4.54404	0.000215696	0.0115734	0.700009
LRP5	-0.508505	8.03954	-4.54323	0.000216095	0.0115734	0.698253
PLS3	2.094	9.23371	4.54076	0.000217317	0.0116128	0.692881
CFI	2.50883	6.59186	4.53744	0.000218968	0.0116749	0.685672
FAM188B	0.502386	6.80584	4.53526	0.000220058	0.0117068	0.680945
GCNT1	1.84537	7.0554	4.53414	0.000220622	0.0117107	0.678505
GPR56	-1.52859	9.58487	-4.52547	0.000225034	0.011821	0.659652
TMOD2	-1.2761	8.41241	-4.52394	0.000225817	0.011821	0.656342
VGF	-0.695976	6.62531	-4.52179	0.000226927	0.011821	0.651672
PTRF	1.20525	9.14018	4.51943	0.000228157	0.011821	0.646526
ZNF543	-0.63988	8.04843	-4.5181	0.000228848	0.0118219	0.643644
NOTCH1	-0.887886	8.85412	-4.51718	0.000229332	0.0118219	0.641635
ARHGEF9	-0.587063	6.98813	-4.51654	0.000229663	0.0118219	0.64026
LHFPL4	-0.764908	7.24552	-4.51394	0.000231032	0.0118668	0.634598
FZD7	1.17116	7.93239	4.51131	0.000232426	0.011893	0.628871
HAP1	-0.786313	7.03114	-4.50982	0.000233216	0.011893	0.62564
INTU	0.850611	5.94749	4.50934	0.000233469	0.011893	0.624608
HOMER1	-1.2268	8.39217	-4.50828	0.000234037	0.011893	0.622294
SLC25A43	0.75836	7.73011	4.50592	0.000235303	0.0119172	0.617158
MR1	1.1332	6.41497	4.50479	0.000235909	0.0119172	0.614709
NUAK1	1.22947	8.15996	4.5046	0.000236014	0.0119172	0.614284
DDX60L	0.806132	6.73352	4.50164	0.000237613	0.0119726	0.607853
IFI16	1.0164	9.49524	4.49973	0.000238651	0.0119995	0.603706
FAM167A	0.693133	6.93063	4.49222	0.000242782	0.0121304	0.587363
GLT25D2	-1.52894	8.0814	-4.48711	0.00024563	0.0121479	0.57626
ZNF221	-0.684625	7.55339	-4.48665	0.000245888	0.0121479	0.575258
ZKSCAN2	-0.56841	7.43281	-4.48537	0.000246609	0.0121479	0.572471
FAM32A	-0.505017	9.21799	-4.48521	0.0002467	0.0121479	0.57212
SEPW1	-0.642682	8.14272	-4.48009	0.000249601	0.0122655	0.560988
GRIK3	-2.44994	7.30411	-4.47352	0.000253377	0.0124056	0.54669
RNFT2	-1.05118	8.06798	-4.46854	0.000256275	0.0124989	0.535862
TMCO7	-0.800567	7.61297	-4.46793	0.000256634	0.0124989	0.534531
TBC1D19	0.866356	7.40798	4.46533	0.000258164	0.0124989	0.528872
TRIM34	0.697556	6.08599	4.46468	0.000258547	0.0124989	0.527461
CALCRL	2.31633	8.4667	4.46257	0.000259798	0.0125086	0.522865
NAT8L	-0.511905	6.81816	-4.46072	0.000260896	0.0125362	0.518849
TRIM6	0.561678	5.72872	4.45928	0.000261758	0.0125523	0.515709
RAB9A	-0.627149	7.76561	-4.45749	0.000262835	0.012554	0.511799
ATP8B2	0.509012	8.09471	4.45503	0.000264313	0.0125845	0.50646
REXO2	0.826863	8.69613	4.45394	0.000264973	0.0125845	0.504086
CARD8	-0.718717	6.60387	-4.45291	0.000265599	0.0125845	0.50184
ST5	0.736945	8.26622	4.45	0.000267372	0.012633	0.495506
MGA	-0.564906	8.2931	-4.44949	0.000267682	0.012633	0.494404
MAMLD1	-0.696544	7.86955	-4.44374	0.000271225	0.0127658	0.481885
SECTM1	0.512228	7.15033	4.44187	0.000272386	0.0127658	0.477819
CYR61	1.67331	9.19747	4.44185	0.000272399	0.0127658	0.477772
ZNF235	-0.799809	6.18915	-4.44145	0.000272647	0.0127658	0.476906
WNT5A	0.961861	7.07658	4.43831	0.000274614	0.012783	0.470064
VASH1	-0.544789	6.97292	-4.43378	0.000277476	0.012842	0.460193
MOXD1	3.24915	8.94653	4.42126	0.000285537	0.0130905	0.432934
CXCL14	2.98428	9.33045	4.42034	0.000286139	0.0130905	0.430929
ADAM22	-1.74629	7.44043	-4.41966	0.000286581	0.0130905	0.429458
TMPRSS5	-0.713952	6.24346	-4.41779	0.000287811	0.0130905	0.425383
POSTN	3.28243	9.6925	4.41276	0.000291144	0.0131667	0.414423
PLLP	-0.71042	7.14087	-4.41043	0.000292696	0.0132024	0.409362
SALL2	-0.899936	6.84104	-4.39823	0.000300985	0.0135092	0.382783
PTPRB	0.580877	4.6793	4.3849	0.000310311	0.0138002	0.353739
BST1	1.13926	6.3717	4.37895	0.000314565	0.0139096	0.340782
LRIG3	2.05499	8.5996	4.37732	0.000315743	0.0139096	0.337224
FAM196B	1.59091	7.5321	4.37539	0.00031714	0.0139197	0.333023
CDHR1	-0.774875	6.12044	-4.37324	0.000318704	0.0139597	0.328342
S100B	-1.05239	8.28462	-4.37253	0.000319223	0.0139597	0.326792
MXRA8	0.792309	7.74735	4.37154	0.000319948	0.0139651	0.324634
SIK2	0.596748	8.98412	4.37076	0.000320519	0.0139651	0.322936
EPS8	0.977658	9.13581	4.36762	0.00032283	0.0140146	0.316101
RAVER2	-0.745453	7.74427	-4.36306	0.000326217	0.0140873	0.306167
TCF12	-0.846344	10.4383	-4.36272	0.000326471	0.0140873	0.305428
ZNF45	-0.525557	7.16845	-4.36219	0.00032687	0.0140873	0.304265
ASNA1	-0.554364	9.13332	-4.36094	0.000327807	0.0141022	0.30154
C1RL	0.770384	6.29734	4.35993	0.000328565	0.0141094	0.299343
PCOLCE	0.530712	7.14341	4.35262	0.000334112	0.0143032	0.283413
PGM2L1	1.19294	8.7726	4.35218	0.000334448	0.0143032	0.282455
SVIL	1.45512	7.44484	4.35162	0.00033488	0.0143032	0.281226
ACTN2	-1.44993	6.04133	-4.34732	0.000338191	0.0144188	0.271865
SPIRE1	-0.674451	8.07697	-4.34252	0.000341935	0.0144901	0.261388
HIST2H2BF	0.535046	7.30126	4.3425	0.000341945	0.0144901	0.261362
FAP	2.0372	4.98038	4.34232	0.000342089	0.0144901	0.260962
TRIM9	-1.82938	8.05562	-4.34176	0.00034253	0.0144901	0.259736
EPHA7	2.08965	6.26195	4.34035	0.00034364	0.0144901	0.256656
FLJ37644	-0.504184	5.1477	-4.34021	0.00034375	0.0144901	0.256352
C1orf61	-2.31041	7.10647	-4.3387	0.000344942	0.0144991	0.25306
PHF15	0.522309	7.41819	4.33625	0.000346881	0.0145294	0.247726
TYRO3	-0.698935	7.72596	-4.33509	0.000347805	0.0145379	0.245195
RPS27L	-0.732293	7.12545	-4.3337	0.000348914	0.0145379	0.242165
ZFP112	-0.572022	6.66329	-4.33138	0.00035077	0.0145766	0.237118
HAVCR1P1	-0.583468	5.06048	-4.33101	0.000351067	0.0145766	0.236313
C12orf5	-0.876889	7.65887	-4.32616	0.00035499	0.0147139	0.225739
CADM2	-0.746688	4.29342	-4.32386	0.000356865	0.014744	0.220728
STAT1	0.708713	9.37681	4.32352	0.000357149	0.014744	0.219972
ITGAV	0.837991	10.6684	4.323	0.000357573	0.014744	0.218842
AHNAK2	1.70036	8.58742	4.32125	0.000359011	0.0147522	0.215025
ARHGAP20	-1.56728	6.0749	-4.31774	0.000361904	0.0148456	0.207387
ARHGAP35	-0.572162	9.7388	-4.31541	0.000363849	0.0148486	0.20229
TIMM44	-0.501688	8.3277	-4.31417	0.000364885	0.0148655	0.199584
ARHGAP18	1.54982	7.68172	4.31105	0.000367495	0.0149208	0.192802
SAE1	-0.578757	10.429	-4.30599	0.000371791	0.0149937	0.181748
FCGR2C	-1.36716	5.69436	-4.30597	0.000371807	0.0149937	0.181708
KLHL8	-0.78911	7.56469	-4.30442	0.000373124	0.0150214	0.178342
MMP16	-1.20458	8.45244	-4.302	0.000375205	0.0150797	0.173053
SCARNA10	-0.768479	7.91504	-4.30061	0.000376397	0.0150814	0.170034
CREB5	-0.740817	7.74715	-4.29975	0.000377145	0.0150814	0.168146
DPYSL3	1.19316	11.1487	4.29774	0.000378885	0.0150954	0.163767
MTSS1L	-1.03404	9.54005	-4.29186	0.000384025	0.0152541	0.150949
BTBD8	0.773288	4.7685	4.28803	0.000387416	0.0153101	0.142589
LIPG	2.0594	9.81336	4.28736	0.000388004	0.0153101	0.141145
RN5S161	-0.599288	7.00768	-4.27963	0.00039495	0.0155071	0.12427
STARD5	0.573135	5.87124	4.27872	0.000395772	0.0155139	0.12229
PLXNB3	-0.565475	7.71999	-4.27628	0.000397989	0.0155752	0.116977
ECE1	1.08537	9.51796	4.27394	0.000400134	0.0156334	0.111865
LOC149837	0.637976	5.89606	4.26782	0.000405786	0.0157706	0.0985253
SHB	0.537804	7.93644	4.26678	0.00040676	0.0157706	0.0962459
S100A10	0.891619	8.28264	4.26608	0.000407406	0.0157706	0.0947374
GNAO1	-1.71543	8.06087	-4.26155	0.000411662	0.0158756	0.084852
SEMA5A	-1.07182	9.29875	-4.26059	0.000412572	0.015885	0.082752
NT5E	1.77243	9.98679	4.25204	0.000420745	0.0161549	0.0640996
CGRRF1	-0.558869	6.54893	-4.25184	0.000420938	0.0161549	0.0636629
GLCCI1	-1.39979	7.21076	-4.24945	0.000423246	0.01618	0.0584634
ZNF566	-0.563399	6.40426	-4.24925	0.000423441	0.01618	0.0580258
PDGFA	-0.706966	8.78164	-4.24714	0.000425495	0.0162253	0.0534233
LOC729506	-0.641339	4.90023	-4.24424	0.000428333	0.0163074	0.0471017
PAG1	-1.35517	7.75758	-4.23899	0.000433525	0.0164788	0.0356451
CYB5R2	0.861955	7.00168	4.23707	0.000435441	0.0165253	0.0314527
NKAIN1	-0.673208	7.02374	-4.23499	0.000437524	0.0165779	0.0269148
MYT1	-0.909457	6.28436	-4.23371	0.000438808	0.0166002	0.024129
POU2F1	-0.538395	8.5967	-4.23299	0.00043954	0.0166015	0.0225427
RCN1P2	0.703747	10.6922	4.23127	0.000441274	0.0166407	0.0187991
FAM95B1	-0.910515	5.91252	-4.23042	0.000442137	0.0166468	0.016942
ZNF223	-0.633541	7.14393	-4.22693	0.000445694	0.0167543	0.00932359
MFAP5	3.49733	6.90908	4.22311	0.000449615	0.0168585	0.000995605
AGPHD1	0.501521	5.61826	4.22217	0.000450587	0.0168585	-0.00105751
MIR340	-0.621399	3.51015	-4.219	0.000453873	0.0169283	-0.00796499
NAMPTL	1.28192	7.92015	4.21644	0.000456547	0.0170014	-0.0135491
MYO1B	2.30901	8.05477	4.2139	0.000459215	0.017074	-0.0190885
CYBRD1	0.851716	9.85355	4.2079	0.000465587	0.017284	-0.032189
BAI1	-0.715089	7.42578	-4.2028	0.000471061	0.0174362	-0.0433017
ITPRIPL2	0.526898	7.91875	4.20219	0.00047172	0.0174362	-0.0446294
COPZ2	1.34458	7.52719	4.20204	0.00047188	0.0174362	-0.0449526
LOC90784	-0.578552	7.48243	-4.19915	0.000475031	0.0174715	-0.0512777
TMEM43	0.517657	10.0529	4.19847	0.000475768	0.0174715	-0.0527522
HIST1H2AE	-0.839145	10.0611	-4.19259	0.000482231	0.0176688	-0.0655781
ABHD5	-0.543875	7.38724	-4.19207	0.000482804	0.0176688	-0.0667072
TLE1P1	-0.66762	8.3499	-4.19156	0.000483377	0.0176688	-0.0678343
PLAG1	1.0841	5.85321	4.19023	0.000484848	0.0176688	-0.0707214
KIAA1107	0.893852	5.00914	4.18537	0.000490289	0.0178398	-0.081328
LMO4	-0.798865	8.23034	-4.17903	0.000497481	0.018019	-0.0951704
TLE1	-0.703146	8.18404	-4.17823	0.000498386	0.0180243	-0.0968967
MICAL2	1.18518	7.60207	4.17706	0.000499735	0.0180457	-0.0994667
SERPINB8	1.09386	8.49776	4.17444	0.000502746	0.0180996	-0.105174
SMARCA4	-0.612461	9.25668	-4.16972	0.000508228	0.0182638	-0.115481
RLBP1	-1.21559	5.79911	-4.168	0.00051023	0.0182638	-0.119218
LRIG1	-0.715972	9.46938	-4.16788	0.000510374	0.0182638	-0.119485
SETD5	-0.569904	8.47835	-4.16709	0.000511297	0.0182638	-0.121203
SH3BGRL2	1.36491	6.80863	4.16323	0.000515853	0.0183283	-0.129633
GPR137B	-0.949198	7.93417	-4.16251	0.000516701	0.0183283	-0.131194
NEK7	1.04205	7.84375	4.16244	0.000516788	0.0183283	-0.131355
MYL9	1.82612	8.78706	4.16134	0.000518094	0.0183473	-0.133752
GCSH	-0.508556	9.2616	-4.15997	0.000519722	0.0183776	-0.136734
NCOA7	0.670924	6.06333	4.15655	0.000523825	0.0184679	-0.144206
RAPGEF4	-0.833403	4.60037	-4.1556	0.000524973	0.0184811	-0.146286
FLRT3	-1.41434	7.08025	-4.15354	0.000527456	0.0185411	-0.15077
NAMPT	1.24154	8.03422	4.14529	0.000537545	0.0188091	-0.168773
UBE2E2	0.724487	7.48296	4.13927	0.000545026	0.0189906	-0.181904
CACNG7	-0.911156	7.55842	-4.13695	0.00054794	0.0190594	-0.18697
ZNF615	-0.683943	6.9569	-4.13597	0.000549166	0.0190594	-0.189094
HIPK3	0.562961	8.48294	4.13554	0.000549707	0.0190594	-0.190029
ACSBG1	-0.771038	6.28231	-4.13516	0.000550197	0.0190594	-0.190876
SLC4A4	-2.64281	7.70794	-4.13315	0.000552735	0.0190975	-0.195249
TSL	-1.33616	4.89611	-4.12772	0.000559678	0.0192479	-0.207107
BEND6	0.988389	7.4738	4.12672	0.000560955	0.019264	-0.209272
BAALC	-0.873228	7.23514	-4.11956	0.000570261	0.019535	-0.224902
CASP8	0.759348	7.0231	4.11923	0.000570687	0.019535	-0.225612
CPQ	0.682578	6.67312	4.11832	0.000571886	0.019535	-0.227604
ZNF285	-0.794544	5.973	-4.11814	0.000572125	0.019535	-0.228001
SDC3	-0.645269	9.29612	-4.11532	0.000575843	0.0196338	-0.234154
MIR4675	0.993051	6.52881	4.1142	0.000577322	0.0196405	-0.236592
SLC46A3	1.17738	6.23888	4.11192	0.00058035	0.0196754	-0.24156
SERTAD4	1.37259	5.91764	4.11121	0.000581294	0.019679	-0.243104
LOC100507088	-1.16822	5.06815	-4.10994	0.000583002	0.0196808	-0.24589
STAC	1.4303	6.53613	4.10792	0.000585706	0.0197442	-0.250286
ZNF649	-1.05414	8.57287	-4.10252	0.00059302	0.0199625	-0.262074
TNFAIP3	1.56974	7.62809	4.09925	0.000597484	0.0200479	-0.269196
USP25	0.661123	8.01701	4.09882	0.000598082	0.0200479	-0.270146
EOGT	0.978619	7.71282	4.09807	0.000599115	0.0200544	-0.271785
ZNF519	-0.701244	6.67676	-4.09723	0.000600263	0.0200646	-0.273603
FCGR2A	-1.32941	6.06154	-4.09634	0.000601497	0.0200777	-0.275553
ZNF420	-0.568228	7.43062	-4.09216	0.000607299	0.0202147	-0.284669
PLCG1	-0.655424	9.29964	-4.08617	0.000615715	0.0203563	-0.297739
CD47	0.811315	9.50261	4.08391	0.000618911	0.0204301	-0.302657
TRAF5	1.02281	6.77433	4.08102	0.000623029	0.0205305	-0.308953
PDIA3P	0.50812	7.93087	4.07895	0.000626008	0.0205498	-0.313482
FAM64A	-0.910732	8.53421	-4.07443	0.000632541	0.0206538	-0.32334
CERS4	-0.622718	7.6559	-4.07373	0.000633556	0.0206538	-0.324863
COL6A3	2.42421	7.28836	4.07362	0.000633713	0.0206538	-0.325098
EPSTI1	1.37834	6.09041	4.07259	0.000635223	0.0206538	-0.327358
HAUS8	-0.780554	7.47063	-4.06756	0.000642596	0.0208367	-0.338315
BLM	-1.13206	7.63419	-4.06574	0.000645284	0.020864	-0.342278
SRI	-0.747126	9.91919	-4.06522	0.000646063	0.020864	-0.343423
RNF165	-0.829431	5.83518	-4.04871	0.000671041	0.0215829	-0.379435
ZNF397	-0.500711	6.91778	-4.04072	0.000683462	0.0219232	-0.396844
CHSY3	1.09889	6.62393	4.03888	0.000686353	0.0219864	-0.400851
APOL1	0.850055	6.64889	4.036	0.000690916	0.0221028	-0.40714
ATP5SL	-0.541636	9.24451	-4.0346	0.000693148	0.0221445	-0.410201
IFITM4P	1.11912	7.10041	4.03268	0.000696213	0.0222127	-0.414389
PTPRZ1	-2.32478	10.6006	-4.0251	0.000708433	0.0224667	-0.430901
PAK1	1.07756	7.65713	4.02358	0.000710904	0.0224931	-0.434207
LDHA	0.70221	8.68461	4.02258	0.000712541	0.0224931	-0.436389
OMG	-1.75871	5.77005	-4.02105	0.000715056	0.0225124	-0.439732
SNAI2	1.16032	8.45845	4.01947	0.000717662	0.0225365	-0.443185
PPM1D	-0.523907	8.46814	-4.01796	0.000720157	0.0225836	-0.446478
SNORD3C	-0.652827	11.4662	-4.01606	0.000723302	0.0226524	-0.450614
POLE4	0.556802	7.10415	4.0102	0.000733104	0.0228692	-0.463386
LOC100505481	-0.88417	6.90287	-4.00634	0.000739638	0.0229347	-0.471806
CPNE5	-0.95175	6.74653	-4.00612	0.000740015	0.0229347	-0.472289
IFNGR2	0.554514	8.67021	4.005	0.000741911	0.0229636	-0.474717
MASP1	-0.881621	6.38376	-4.00344	0.000744585	0.0230165	-0.478131
MX1	0.866514	6.89475	4.00165	0.000747637	0.0230809	-0.482011
SLC2A13	-0.921037	6.94032	-4.00052	0.000749584	0.0230916	-0.484479
PDE4D	0.947051	5.83038	3.9991	0.000752033	0.0231246	-0.487573
MAP3K5	2.06007	7.04524	3.99858	0.000752936	0.0231246	-0.488712
LOC100287314	0.966391	6.45596	3.99787	0.000754163	0.0231325	-0.490257
DHPS	-0.625654	9.18055	-3.99344	0.000761876	0.0232821	-0.49991
TMEM200A	1.54236	5.79857	3.99091	0.000766322	0.0233498	-0.50543
C5orf30	-0.526015	7.60053	-3.98838	0.00077079	0.0234314	-0.510945
HEPACAM	-2.09498	7.974	-3.9877	0.000771996	0.0234356	-0.512428
SERPINF1	1.69612	7.58842	3.98719	0.000772895	0.0234356	-0.513532
KIAA1715	-0.535615	8.43031	-3.986	0.000775005	0.02344	-0.516118
MIR604	1.09577	6.58925	3.98322	0.000779974	0.0235604	-0.522181
POLDIP3	-0.722408	8.56327	-3.98265	0.000780995	0.0235613	-0.523422
SYNPO	0.724956	7.56469	3.98198	0.000782199	0.0235678	-0.524883
FNTB	-0.774214	7.59166	-3.97508	0.0007947	0.023835	-0.539922
PRRG4	1.12983	5.23864	3.97488	0.000795066	0.023835	-0.540358
PTPRM	2.1421	7.67316	3.97207	0.000800221	0.0239236	-0.546488
SREBF2	-0.568401	8.29037	-3.97162	0.000801035	0.0239236	-0.547453
NEXN	0.895216	5.7091	3.9654	0.000812564	0.024183	-0.561005
GPX8	1.93689	8.14233	3.9653	0.000812762	0.024183	-0.561237
SCUBE2	2.21202	7.72823	3.96473	0.000813827	0.0241845	-0.562478
PTPN14	1.02277	9.33884	3.96082	0.00082117	0.0243022	-0.570997
HUNK	-0.929153	7.45473	-3.96063	0.000821517	0.0243022	-0.571398
TNS3	1.23798	8.25092	3.95782	0.000826848	0.0243312	-0.577532
ZNF100	-0.627435	7.97674	-3.95777	0.000826932	0.0243312	-0.577627
FAH	0.526461	6.78657	3.95282	0.000836394	0.0245793	-0.588416
ADAMTS1	1.74448	7.81491	3.94815	0.000845426	0.0246535	-0.598601
LOC100127888	-0.635761	5.96444	-3.94777	0.000846161	0.0246535	-0.599425
ERI2	-0.549339	7.4938	-3.94689	0.000847874	0.0246732	-0.601342
MRC2	0.779168	8.84819	3.94544	0.00085069	0.024725	-0.604486
MAST1	-0.568731	6.70943	-3.94393	0.000853651	0.0247681	-0.607781
DKK2	1.26164	5.46076	3.94362	0.000854252	0.0247681	-0.608448
COL12A1	2.87672	7.63837	3.93969	0.000862009	0.0249043	-0.617018
NCKAP5	-0.814605	4.59101	-3.93967	0.000862047	0.0249043	-0.61706
SPATA6	-1.04925	8.26814	-3.93933	0.000862723	0.0249043	-0.617803
NXPE3	0.672249	7.91098	3.93882	0.000863728	0.0249043	-0.618907
VSNL1	1.46254	7.96249	3.9386	0.000864173	0.0249043	-0.619395
BRD7	-0.572974	9.1924	-3.93762	0.000866114	0.0249286	-0.621522
LOC100133920	-1.05475	5.95043	-3.93712	0.000867109	0.0249286	-0.622611
MIR3973	-0.698188	5.0928	-3.93551	0.000870316	0.0249907	-0.626111
ZNF136	-0.506152	6.71392	-3.93112	0.000879152	0.025214	-0.635687
SKINTL	-0.718254	4.56667	-3.92701	0.000887472	0.0253611	-0.644616
SBK1	-0.675613	6.80468	-3.91917	0.000903614	0.0256379	-0.661702
CCDC122	0.687851	4.21527	3.91825	0.00090551	0.0256611	-0.663688
MMP19	0.880191	6.34512	3.91659	0.000908976	0.025684	-0.66731
2007-09-01	-0.540301	9.55457	-3.91506	0.000912183	0.0256975	-0.670648
SH3PXD2B	-0.568944	9.14305	-3.91438	0.000913605	0.0257071	-0.672123
C2orf80	-2.28565	6.40379	-3.91229	0.000917997	0.0257699	-0.676669
RFX7	-0.630701	7.98257	-3.91124	0.000920216	0.0258018	-0.678957
ZNF738	-0.785883	8.67656	-3.9099	0.000923058	0.025851	-0.68188
ORAI3	0.523463	7.48927	3.90589	0.000931593	0.0260289	-0.690602
CYFIP2	-1.09477	8.44402	-3.90175	0.000940499	0.026247	-0.699618
FBXO32	1.93353	8.32924	3.89983	0.000944652	0.0263013	-0.703794
TAS2R10	-0.777329	5.40306	-3.89736	0.000950018	0.026389	-0.709161
USP3	-0.855807	8.22165	-3.89328	0.000958961	0.0265542	-0.718039
ZDHHC11B	-0.781658	6.10251	-3.89313	0.000959307	0.0265542	-0.718381
TWSG1	0.529205	9.65311	3.88938	0.000967592	0.0267095	-0.726528
HRASLS5	1.24154	6.21307	3.88707	0.000972749	0.0267399	-0.731565
CTSB	0.583879	9.41767	3.88547	0.000976325	0.0268073	-0.735041
MIDN	-0.594244	8.80113	-3.88481	0.000977794	0.0268168	-0.736466
ABCC3	1.62506	8.16303	3.88371	0.000980274	0.0268539	-0.738866
SLC39A14	0.702849	8.44852	3.88085	0.000986743	0.0269236	-0.745097
LOC100287623	-0.842657	6.94196	-3.88009	0.000988469	0.0269236	-0.746753
ADAM12	1.50192	9.57912	3.87879	0.000991418	0.0269731	-0.749575
ANK1	0.665189	6.76217	3.8738	0.00100284	0.0272217	-0.760425
PGAP1	-0.809592	8.35917	-3.87143	0.00100831	0.027308	-0.765579
HIST1H4J	-0.520857	7.30429	-3.8628	0.00102849	0.0277599	-0.784349
PIP4K2A	0.650387	7.44698	3.85886	0.00103783	0.0279241	-0.792915
ARHGAP24	1.20168	5.93375	3.85876	0.00103809	0.0279241	-0.793147
KCTD9	1.33985	8.53808	3.85455	0.00104815	0.0280996	-0.802281
SBSPON	1.50306	5.82101	3.85331	0.00105115	0.0281484	-0.804988
MLLT3	1.17515	7.32473	3.85219	0.00105386	0.0281576	-0.807425
ZNF776	-0.540586	8.51054	-3.8512	0.00105625	0.0281632	-0.809567
CHD7	-1.3821	7.87398	-3.85113	0.00105643	0.0281632	-0.809733
ERRFI1	0.69521	8.06765	3.85008	0.00105897	0.0281993	-0.812004
SAMD9	1.34681	7.20026	3.84834	0.0010632	0.0282805	-0.815786
SUMF2	0.58188	9.84395	3.84777	0.00106461	0.0282864	-0.817038
DDX58	0.639494	7.15702	3.84552	0.00107012	0.028401	-0.821922
IGSF11	-0.588056	5.79909	-3.84327	0.00107567	0.0284379	-0.826824
GINS3	-0.538753	6.89717	-3.84302	0.00107628	0.0284379	-0.827359
PODN	0.700372	7.64378	3.84106	0.00108112	0.028469	-0.831611
SLC35F1	-1.87995	9.6041	-3.84068	0.00108208	0.028469	-0.832451
GJA1	1.77316	10.4515	3.84061	0.00108224	0.028469	-0.832586
RALGAPA1	-0.690401	8.12869	-3.8365	0.00109252	0.0286131	-0.841535
GPHN	-1.00964	7.07349	-3.83346	0.00110016	0.0287502	-0.848138
NFKBIZ	1.35922	6.68624	3.832	0.00110386	0.0288152	-0.851314
ATCAY	-1.41442	6.86907	-3.82601	0.00111914	0.0291306	-0.864328
PDPR	-0.547758	8.55876	-3.82583	0.00111961	0.0291306	-0.864725
TAGLN	1.02634	7.64885	3.82409	0.00112407	0.0292147	-0.868488
ZNF333	-0.534356	6.99683	-3.8236	0.00112534	0.0292159	-0.869558
ZNF559	-0.524689	7.3305	-3.82195	0.00112961	0.0292858	-0.873145
PTPLAD2	1.30977	4.60693	3.82161	0.00113049	0.0292858	-0.87388
DPT	1.3982	5.15077	3.81835	0.00113899	0.0294201	-0.880973
CKB	-1.2864	9.83443	-3.81509	0.00114753	0.0295665	-0.888038
ZNF613	-0.51085	7.16843	-3.81192	0.00115591	0.0296784	-0.894931
DAB1	-1.12983	6.03965	-3.81139	0.00115732	0.0296784	-0.896084
SOX5	-0.957287	8.24078	-3.81084	0.00115877	0.0296784	-0.897271
IFITM3	1.42238	10.4053	3.81024	0.00116037	0.0296784	-0.898573
FAM106B	-0.720289	5.97223	-3.80988	0.00116135	0.0296784	-0.89937
SP140L	0.854579	7.27632	3.80061	0.00118631	0.0301125	-0.919498
LOC283922	-0.522652	8.58953	-3.79462	0.00120272	0.030371	-0.932499
STK17B	0.78113	7.1122	3.79438	0.00120339	0.030371	-0.933019
CXXC4	-0.92713	5.20497	-3.79016	0.00121509	0.0305484	-0.942176
KIAA1217	0.853267	6.69216	3.78948	0.001217	0.0305634	-0.943659
ANPEP	2.34286	7.80058	3.78204	0.00123796	0.0309287	-0.959814
SYNPO2	0.794924	4.60001	3.78201	0.00123803	0.0309287	-0.95987
GPR39	0.591653	5.45582	3.7802	0.00124318	0.0310204	-0.9638
RAB8B	-0.973327	9.13374	-3.7785	0.00124805	0.0310204	-0.967497
OSTC	0.555249	9.31163	3.77844	0.00124821	0.0310204	-0.967617
APBA2	-0.724034	7.89208	-3.77762	0.00125056	0.0310464	-0.969396
CTSO	1.3432	8.96684	3.77686	0.00125276	0.0310546	-0.971062
C22orf32	-0.562302	8.23512	-3.7757	0.0012561	0.0310546	-0.973579
ZNF14	-0.522625	7.04074	-3.77447	0.00125962	0.0311094	-0.976228
MYH9	1.18719	9.86426	3.77016	0.00127214	0.031139	-0.985581
SLC35B3	0.51463	7.60109	3.77014	0.00127222	0.031139	-0.985639
MYEF2	-0.847059	8.65646	-3.77002	0.00127255	0.031139	-0.985883
FOXRED2	-0.690644	8.40173	-3.7698	0.00127321	0.031139	-0.986376
SKIL	0.98215	7.82123	3.76973	0.00127342	0.031139	-0.986532
FAM123A	-0.503322	6.20718	-3.76968	0.00127356	0.031139	-0.986636
USP2	-0.979236	7.25682	-3.76961	0.00127376	0.031139	-0.986787
VPS37B	-0.533871	8.79379	-3.76715	0.00128096	0.0312392	-0.992112
FAM176A	0.753246	6.04096	3.76621	0.00128373	0.0312392	-0.994157
SNORD3A	-0.606658	11.7757	-3.7662	0.00128377	0.0312392	-0.994186
MTSS1	-1.2406	7.63076	-3.76539	0.00128615	0.0312392	-0.995939
HIST1H2BB	-1.04446	5.92052	-3.76505	0.00128716	0.0312392	-0.996681
ZNF678	-0.747023	6.62469	-3.76352	0.00129169	0.031265	-1
MSRB3	0.965626	7.21491	3.76188	0.00129655	0.0313394	-1.00355
SLC25A24	1.07456	7.72614	3.76126	0.00129839	0.031352	-1.00489
C21orf7	0.768088	6.13296	3.76048	0.00130073	0.0313599	-1.0066
PPP2R5A	-0.519741	6.53815	-3.75943	0.00130385	0.0313854	-1.00887
SNORD123	1.49672	6.90289	3.75843	0.00130685	0.0313854	-1.01104
PARVA	1.12846	9.483	3.75796	0.00130825	0.0313854	-1.01205
ERAP1	0.885291	8.42557	3.75395	0.00132034	0.0315773	-1.02075
SNORA50	-0.772141	8.62706	-3.74687	0.00134195	0.0319188	-1.0361
C5orf15	0.542046	8.32779	3.74472	0.00134858	0.0320125	-1.04076
GDF11	-0.655305	7.7804	-3.74225	0.00135624	0.0321624	-1.04611
SRPX2	1.57141	8.03869	3.74015	0.00136279	0.0322215	-1.05067
ITGA11	1.86048	8.31242	3.73702	0.0013726	0.0323927	-1.05745
PRICKLE1	0.917212	8.1649	3.73698	0.00137274	0.0323927	-1.05755
ZNF546	-0.627592	5.85366	-3.73615	0.00137536	0.0324003	-1.05934
GPR124	0.616706	7.34218	3.73558	0.00137715	0.0324003	-1.06057
FRRS1	1.1554	5.8599	3.73206	0.00138832	0.0325668	-1.06821
RAB38	1.25388	6.24878	3.73022	0.00139419	0.0326723	-1.0722
LIN7A	1.51409	7.42806	3.7276	0.00140257	0.0327399	-1.07787
GLIPR1	1.61659	9.95804	3.72624	0.00140696	0.0328061	-1.08082
COL3A1	2.30468	7.79312	3.72587	0.00140816	0.0328061	-1.08163
FAM129B	0.886323	8.64938	3.72479	0.00141163	0.0328549	-1.08395
LY6E	0.587155	8.52533	3.72358	0.00141557	0.0329144	-1.08659
SERTAD2	0.661348	8.44643	3.72186	0.00142115	0.0329339	-1.0903
ASS1	1.73257	8.71949	3.72091	0.00142425	0.0329449	-1.09236
MIR2110	0.671311	6.87337	3.71868	0.00143154	0.0329982	-1.09719
C1orf140	0.520068	4.43961	3.7177	0.00143476	0.0330383	-1.09931
KIF1A	-1.00028	7.32921	-3.712	0.00145365	0.0334088	-1.11167
LOC646543	-1.25652	6.22362	-3.71059	0.00145834	0.0334653	-1.11472
DDHD1	-0.716114	7.06202	-3.70866	0.0014648	0.0335357	-1.11889
RN5S196	-0.931002	7.52638	-3.7071	0.00147006	0.0335948	-1.12228
OSTF1	1.68197	8.4939	3.70664	0.00147161	0.0335948	-1.12328
MARVELD1	0.935918	6.96575	3.70529	0.00147617	0.0336667	-1.1262
IFITM1	0.825492	7.27811	3.69925	0.00149673	0.0339917	-1.13927
TNFSF10	1.40627	5.32625	3.69861	0.00149895	0.0339917	-1.14066
CASP6	0.756099	7.91957	3.69302	0.00151824	0.0342654	-1.15275
NTNG1	0.911198	6.55833	3.69105	0.00152511	0.0343263	-1.15701
EPHB2	0.64147	8.00362	3.69038	0.00152747	0.0343263	-1.15847
COBL	-1.31389	7.86942	-3.69021	0.00152806	0.0343263	-1.15884
SRPR	0.592985	10.4188	3.68993	0.00152906	0.0343263	-1.15945
RUNDC3A	-0.692121	6.82513	-3.68978	0.00152956	0.0343263	-1.15976
HEG1	0.943947	9.47395	3.68978	0.00152958	0.0343263	-1.15978
ARL6IP5	0.632195	10.7172	3.68728	0.00153834	0.0344367	-1.16517
ITGB4	1.32366	8.14905	3.68714	0.00153884	0.0344367	-1.16547
AGAP1	-0.737986	6.8718	-3.68498	0.00154649	0.0345755	-1.17016
PDE9A	-0.603191	7.27029	-3.68215	0.00155654	0.0347025	-1.17628
DNER	-1.86468	7.46242	-3.67923	0.00156699	0.0349029	-1.1826
HIST1H1T	-0.66404	5.90838	-3.67832	0.00157024	0.03491	-1.18455
IFI30	1.38517	8.33891	3.67552	0.00158034	0.034994	-1.19061
FLRT2	1.5296	6.05735	3.67551	0.0015804	0.034994	-1.19064
ANKRD5	1.08215	6.28371	3.67404	0.00158571	0.034994	-1.19381
CERS1	-0.867665	9.09539	-3.67399	0.0015859	0.034994	-1.19392
DHX58	0.592043	6.85543	3.67043	0.0015989	0.0352118	-1.20163
HTR2A	1.00951	4.56663	3.67011	0.00160007	0.0352118	-1.20232
LOC100507127	2.61008	6.99607	3.66926	0.00160319	0.0352481	-1.20417
PCDH18	1.7924	8.93412	3.66837	0.00160644	0.0352869	-1.20607
TAS2R14	-0.525413	7.0487	-3.66608	0.0016149	0.0353656	-1.21103
COL25A1	0.742229	6.21719	3.66442	0.00162105	0.0354426	-1.21462
ARSJ	1.14481	8.31559	3.661	0.0016338	0.0355926	-1.22202
IFITM2	1.37794	9.67506	3.66046	0.0016358	0.0356036	-1.22317
ZNF532	0.659835	8.65909	3.65407	0.00165993	0.0360631	-1.237
APOL6	0.786556	7.61386	3.65037	0.00167403	0.0362701	-1.24498
TUBB4A	-0.586184	7.46679	-3.6478	0.00168392	0.0364183	-1.25054
ANXA2P2	1.11372	12.0061	3.64723	0.00168613	0.0364329	-1.25178
GINS2	-0.995877	7.5917	-3.64682	0.0016877	0.0364338	-1.25266
CCDC77	-0.521133	7.10468	-3.64219	0.00170567	0.036752	-1.26265
RNF144B	0.750858	6.0709	3.63932	0.00171693	0.0369107	-1.26886
MGST1	0.890114	4.68503	3.63917	0.00171753	0.0369107	-1.26919
PODXL2	-0.697786	8.3169	-3.63854	0.00172	0.0369303	-1.27055
GALNT5	1.90786	6.63177	3.63703	0.00172596	0.0369916	-1.27381
LOC283174	-1.35602	5.86514	-3.63231	0.0017447	0.0372928	-1.28401
LCA5	0.663377	6.296	3.63133	0.00174861	0.0373224	-1.28612
TRAK1	-0.526929	7.81584	-3.63071	0.0017511	0.0373292	-1.28746
TRANK1	1.26828	6.78441	3.62879	0.00175879	0.0374262	-1.2916
SPC25	-0.781498	6.43781	-3.62567	0.00177141	0.0376275	-1.29834
ZSCAN29	-0.512304	6.98491	-3.62274	0.00178331	0.0377676	-1.30466
ZFP14	-0.818455	6.068	-3.62227	0.00178522	0.0377676	-1.30567
UFM1	0.546636	8.1857	3.62215	0.00178572	0.0377676	-1.30593
ARID4A	-0.520869	7.41717	-3.62213	0.00178579	0.0377676	-1.30597
EEPD1	-0.624114	6.92035	-3.619	0.00179862	0.0378848	-1.31272
SLC24A3	-1.38406	6.59947	-3.61895	0.00179886	0.0378848	-1.31285
ERBB4	-1.32606	5.82762	-3.61881	0.00179942	0.0378848	-1.31314
PDE5A	1.26991	5.08676	3.61811	0.0018023	0.0379119	-1.31465
SLIT3	1.06764	6.88594	3.61594	0.00181129	0.0380004	-1.31934
HIVEP1	0.56778	7.62499	3.61531	0.00181389	0.0380214	-1.32069
KIAA1804	0.682121	5.49191	3.61132	0.00183053	0.0382388	-1.32931
ZNF714	-0.630836	8.27462	-3.61128	0.00183068	0.0382388	-1.32938
COL24A1	0.643738	5.48165	3.60851	0.00184234	0.0384487	-1.33537
TMEM81	-1.30502	4.28014	-3.60773	0.0018456	0.0384831	-1.33704
C14orf45	0.548582	5.5632	3.60672	0.00184989	0.0385389	-1.33923
PTAR1	-0.649909	9.39286	-3.60487	0.00185773	0.0386346	-1.34322
SCAMP5	-0.712073	7.2799	-3.60333	0.0018643	0.0387053	-1.34655
CD200	-0.819543	6.72688	-3.60331	0.00186437	0.0387053	-1.34659
NMRK1	0.934832	5.78144	3.60267	0.00186709	0.0387278	-1.34796
PLP2	1.71698	9.94261	3.5998	0.00187937	0.0389488	-1.35414
FAM65B	1.65404	6.91865	3.59858	0.00188465	0.0390242	-1.35679
LRP12	0.688763	7.71911	3.59635	0.00189428	0.0391113	-1.36159
SNORA46	-0.684298	6.19207	-3.59609	0.00189542	0.0391113	-1.36216
B3GAT1	-0.714911	7.0707	-3.59433	0.00190304	0.0392007	-1.36594
HGF	1.09354	4.67258	3.59371	0.00190572	0.0392219	-1.36727
ARHGAP29	1.63002	7.90483	3.59188	0.00191374	0.0393192	-1.37123
ZNF211	-0.590167	7.56149	-3.59139	0.00191589	0.0393294	-1.37229
MYD88	0.6126	8.71186	3.58994	0.00192225	0.0393697	-1.37541
SCG5	1.37951	6.4204	3.58733	0.00193374	0.0395594	-1.38103
RTTN	-0.721631	7.21951	-3.58603	0.00193948	0.0396088	-1.38382
PIK3C2B	-1.24016	6.9706	-3.5833	0.00195164	0.0397891	-1.38972
CHKA	-0.69369	8.31259	-3.5812	0.00196102	0.039912	-1.39424
TPMT	0.737812	8.05137	3.57965	0.00196797	0.0399711	-1.39757
TMEM220	0.660444	6.04471	3.57907	0.00197059	0.0399711	-1.39883
CDC34	-0.543955	8.20733	-3.57891	0.00197133	0.0399711	-1.39918
IFIH1	0.890245	6.38237	3.57869	0.00197231	0.0399711	-1.39965
SOX9	-0.701935	10.4339	-3.57753	0.00197753	0.0400363	-1.40214
ODF2L	0.730615	5.80279	3.57723	0.00197888	0.0400363	-1.40278
ELAVL4	-1.45665	5.00145	-3.57611	0.00198395	0.0400519	-1.4052
NIPSNAP3B	0.81077	4.16012	3.57481	0.00198986	0.0400519	-1.408
C6orf141	1.02066	7.6399	3.57447	0.00199142	0.0400519	-1.40874
FAM131B	-0.928523	6.81342	-3.57286	0.00199877	0.0401319	-1.41221
LOC100289026	-1.52064	5.59735	-3.5695	0.00201416	0.0404069	-1.41944
LOC100507447	-1.42947	6.35067	-3.56875	0.00201764	0.0404428	-1.42107
SSFA2	-0.608501	8.8041	-3.56769	0.0020225	0.0405062	-1.42333
PION	1.31888	6.3918	3.56659	0.0020276	0.0405741	-1.4257
LOC100127983	1.10519	6.78194	3.56301	0.00204426	0.0408731	-1.43341
ASPN	2.43423	4.86482	3.56169	0.00205044	0.0409362	-1.43626
MXRA7	0.614333	11.1294	3.5616	0.00205084	0.0409362	-1.43645
FAM189A2	-0.661796	5.58874	-3.56096	0.00205387	0.0409623	-1.43784
FNDC3B	0.579309	9.57747	3.55716	0.00207177	0.0412377	-1.44601
TEAD1	0.572588	9.56057	3.557	0.0020725	0.0412377	-1.44634
C11orf41	-0.995161	7.60571	-3.55692	0.00207287	0.0412377	-1.44651
YAP1	1.13732	8.38052	3.5499	0.00210638	0.0416609	-1.46162
C9orf64	1.02713	7.10374	3.54385	0.0021357	0.0420154	-1.47464
CABYR	0.74732	6.57785	3.54364	0.00213671	0.0420154	-1.47509
SHC1	0.825273	9.55883	3.54285	0.0021406	0.0420154	-1.4768
ZNF345	-0.547005	5.96383	-3.54047	0.00215223	0.0420515	-1.4819
AGBL2	0.702545	4.9462	3.54014	0.00215388	0.0420515	-1.48262
C11orf70	1.32668	5.20207	3.54004	0.00215436	0.0420515	-1.48283
NHS	0.616225	5.44385	3.53952	0.0021569	0.0420666	-1.48394
LOC100132891	0.790594	5.52265	3.53565	0.00217607	0.0422399	-1.49228
SPECC1	-0.809108	8.69173	-3.53496	0.00217951	0.0422655	-1.49377
ZNF708	-0.689523	8.36993	-3.52984	0.00220512	0.042658	-1.50477
KLHDC8A	-1.31196	9.14057	-3.52878	0.00221047	0.0427267	-1.50705
MIOS	-0.520743	7.32474	-3.5265	0.00222199	0.0428453	-1.51194
VAT1L	2.27007	7.99237	3.51883	0.00226124	0.0433566	-1.52843
CTSC	1.93787	9.38929	3.51751	0.00226802	0.0433787	-1.53125
BRP44L	-0.517234	7.87461	-3.51271	0.00229302	0.0435803	-1.54157
OCIAD2	1.2594	7.8326	3.5102	0.00230619	0.0437606	-1.54696
ITGB1	0.864072	10.4655	3.50904	0.00231229	0.0438416	-1.54944
F2RL2	2.46882	7.7119	3.50616	0.00232752	0.0440252	-1.55562
RRAS2	0.815845	8.09819	3.50338	0.00234234	0.0442602	-1.5616
A2M	1.14161	7.5732	3.50279	0.00234551	0.0442602	-1.56287
TMEM132B	-1.40439	6.51627	-3.49959	0.0023627	0.0444437	-1.56974
HOXB5	1.47884	6.77367	3.49758	0.00237353	0.0446122	-1.57404
HIST1H3A	-1.10833	6.99783	-3.49609	0.00238161	0.0446731	-1.57724
ENPP5	1.75054	5.46375	3.49164	0.00240587	0.0449184	-1.58678
C19orf48	-0.61573	7.69118	-3.49148	0.00240678	0.0449184	-1.58713
RBM7	0.640725	7.18463	3.49011	0.00241431	0.0449501	-1.59007
ST6GALNAC3	1.17796	4.54363	3.4898	0.00241602	0.0449501	-1.59074
B3GALT1	-1.25788	7.07837	-3.4883	0.00242428	0.0450685	-1.59395
DLL3	-1.41279	7.00066	-3.4834	0.00245149	0.0454019	-1.60445
SOSTDC1	0.87998	4.0901	3.48	0.00247057	0.0455503	-1.61174
IGSF9B	-0.694431	7.12037	-3.47989	0.00247122	0.0455503	-1.61199
RBP1	0.80159	6.10745	3.47848	0.00247914	0.045661	-1.615
EVC	0.586863	7.81931	3.47766	0.00248378	0.0457111	-1.61675
LOC100506304	1.1126	4.09758	3.47729	0.00248591	0.045715	-1.61756
FEZF1	2.24932	7.75616	3.47607	0.00249278	0.0457768	-1.62016
PDXP	-0.543823	7.63497	-3.47597	0.0024934	0.0457768	-1.62039
IFT57	0.583129	8.3687	3.47534	0.00249695	0.0457768	-1.62173
MAPK4	-1.32871	6.60495	-3.47299	0.00251037	0.0459535	-1.62677
ITGA4	1.62458	6.57959	3.47293	0.00251071	0.0459535	-1.6269
LPPR5	-1.81259	7.30537	-3.47264	0.00251237	0.0459535	-1.62752
SLFN5	1.34847	7.10505	3.47198	0.00251615	0.0459873	-1.62893
CUL7	0.549382	7.88971	3.47105	0.00252151	0.0460146	-1.63093
IGF1	1.17991	5.26657	3.4703	0.00252578	0.0460492	-1.63252
GATA6	0.876136	6.9151	3.47004	0.00252726	0.0460492	-1.63308
RNY4	-0.792804	5.0868	-3.46896	0.00253353	0.0461266	-1.63541
MAPK8IP1	-0.720552	8.41924	-3.46781	0.00254019	0.0461435	-1.63788
MBNL3	-1.01546	6.92963	-3.46561	0.0025529	0.046308	-1.64257
NAV3	1.05855	7.06678	3.46557	0.00255313	0.046308	-1.64265
ZNF850	-1.04146	8.73281	-3.46068	0.00258177	0.0466608	-1.65314
KIAA1244	-0.694299	6.42972	-3.45201	0.00263323	0.0473285	-1.67169
CNTNAP3B	-0.957261	7.19514	-3.44977	0.00264667	0.0474986	-1.67648
SNORD3B	-0.596679	11.5333	-3.44906	0.002651	0.0475404	-1.67802
PMP2	-2.55057	9.4104	-3.44676	0.00266491	0.0476824	-1.68294
MIR3198	-0.607076	9.06715	-3.44321	0.00268651	0.0479607	-1.69052
PARP11	-0.656145	6.92583	-3.44032	0.00270424	0.048169	-1.6967
P4HA2	0.510689	5.84696	3.43506	0.00273682	0.0485317	-1.70796
SECISBP2L	-0.560422	9.12639	-3.43459	0.00273974	0.0485474	-1.70896
RNF182	0.72368	7.23146	3.43182	0.00275705	0.0487454	-1.71488
ZNF85	-0.651912	7.39895	-3.43073	0.00276389	0.0488301	-1.71721
CCL2	2.09774	11.046	3.42705	0.00278717	0.0490694	-1.72509
ARHGAP19	-0.908928	7.38472	-3.42608	0.00279332	0.0491315	-1.72716
PLA2R1	1.74469	5.63569	3.42503	0.00279997	0.0492122	-1.72939
GAD1	-1.60358	7.07086	-3.42357	0.00280932	0.04934	-1.73252
HEPN1	-1.36311	6.33759	-3.4216	0.00282192	0.0494525	-1.73672
HOXB2	1.18412	7.59779	3.4211	0.00282511	0.0494717	-1.73779
SEMA3C	2.77969	7.71368	3.42002	0.00283207	0.049557	-1.7401
NIPSNAP3A	0.50883	7.15601	3.41873	0.00284036	0.049587	-1.74284
NES	-0.693111	10.155	-3.41846	0.0028421	0.049587	-1.74342
PLAU	0.931399	7.93079	3.41667	0.00285373	0.0497535	-1.74726

## Sheet: Figure 3H (1)
Pathways enriched from the gene list in Figure 3F
GO.ID	Description	p.Val	FDR	Phenotype	Genes
GO:0030198	extracellular matrix organization	6.68433e-32	6.68433e-32	1	ENSG00000080573,ENSG00000117122,ENSG00000134013,ENSG00000171812,ENSG00000123342,ENSG00000106991,ENSG00000138080,ENSG00000111799,ENSG00000113083,ENSG00000187955,ENSG00000162733,ENSG00000144824,ENSG00000118523,ENSG00000164692,ENSG00000143387,ENSG00000135862,ENSG00000142798,ENSG00000166147,ENSG00000161638,ENSG00000142173,ENSG00000185585,ENSG00000115232,ENSG00000178031,ENSG00000142156,ENSG00000157227…
GO:0043062	extracellular structure organization	7.51196e-32	7.51196e-32	1	ENSG00000080573,ENSG00000117122,ENSG00000134013,ENSG00000171812,ENSG00000123342,ENSG00000106991,ENSG00000138080,ENSG00000111799,ENSG00000113083,ENSG00000187955,ENSG00000162733,ENSG00000144824,ENSG00000118523,ENSG00000164692,ENSG00000143387,ENSG00000135862,ENSG00000142798,ENSG00000166147,ENSG00000161638,ENSG00000142173,ENSG00000185585,ENSG00000115232,ENSG00000178031,ENSG00000142156,ENSG00000157227…
GO:0031589	cell-substrate adhesion	1.51133e-14	1.51133e-14	1	ENSG00000080573,ENSG00000138080,ENSG00000120156,ENSG00000144824,ENSG00000118523,ENSG00000135862,ENSG00000124126,ENSG00000161638,ENSG00000115232,ENSG00000198542,ENSG00000157227,ENSG00000108821,ENSG00000168309,ENSG00000152818,ENSG00000142871,ENSG00000122861,ENSG00000205221,ENSG00000150093,ENSG00000133110,ENSG00000137801,ENSG00000077942,ENSG00000168477,ENSG00000159871,ENSG00000100097,ENSG00000109743…
GO:0032963	collagen metabolic process	7.09249e-14	7.09249e-14	1	ENSG00000123342,ENSG00000106991,ENSG00000138080,ENSG00000118523,ENSG00000164692,ENSG00000143387,ENSG00000157227,ENSG00000108821,ENSG00000113721,ENSG00000130635,ENSG00000150093,ENSG00000168477,ENSG00000197467,ENSG00000142552,ENSG00000110811,ENSG00000065308,ENSG00000116285,ENSG00000149257,ENSG00000011028,ENSG00000204291,ENSG00000117385,ENSG00000166482
GO:0001501	skeletal system development	1.14277e-12	1.14277e-12	1	ENSG00000134013,ENSG00000106991,ENSG00000113083,ENSG00000120156,ENSG00000118523,ENSG00000164692,ENSG00000143387,ENSG00000166147,ENSG00000068078,ENSG00000092607,ENSG00000170891,ENSG00000157227,ENSG00000108821,ENSG00000113721,ENSG00000158859,ENSG00000019549,ENSG00000174600,ENSG00000157404,ENSG00000142871,ENSG00000154764,ENSG00000164107,ENSG00000183160,ENSG00000114861,ENSG00000197467,ENSG00000132692…
GO:0030199	collagen fibril organization	1.9692e-12	1.9692e-12	1	ENSG00000080573,ENSG00000134013,ENSG00000138080,ENSG00000111799,ENSG00000113083,ENSG00000187955,ENSG00000162733,ENSG00000164692,ENSG00000108821,ENSG00000130635,ENSG00000138131,ENSG00000168477,ENSG00000197467,ENSG00000139329
GO:0001944	vasculature development	3.26084e-12	3.26084e-12	1	ENSG00000164619,ENSG00000134013,ENSG00000171812,ENSG00000123342,ENSG00000106991,ENSG00000138080,ENSG00000113083,ENSG00000020181,ENSG00000120156,ENSG00000118523,ENSG00000164692,ENSG00000142798,ENSG00000161638,ENSG00000102554,ENSG00000069702,ENSG00000240583,ENSG00000157227,ENSG00000108821,ENSG00000113721,ENSG00000152104,ENSG00000130635,ENSG00000157404,ENSG00000004776,ENSG00000142871,ENSG00000154764…
GO:0030335	positive regulation of cell migration	5.35344e-11	5.35344e-11	1	ENSG00000106538,ENSG00000020181,ENSG00000162733,ENSG00000161921,ENSG00000120156,ENSG00000115594,ENSG00000124126,ENSG00000161638,ENSG00000115232,ENSG00000240583,ENSG00000157227,ENSG00000108821,ENSG00000113721,ENSG00000019549,ENSG00000168309,ENSG00000174600,ENSG00000157404,ENSG00000115461,ENSG00000142871,ENSG00000154764,ENSG00000122861,ENSG00000150093,ENSG00000105974,ENSG00000133110,ENSG00000154734…
GO:2000147	positive regulation of cell motility	6.29419e-11	6.29419e-11	1	ENSG00000106538,ENSG00000020181,ENSG00000162733,ENSG00000161921,ENSG00000120156,ENSG00000115594,ENSG00000124126,ENSG00000161638,ENSG00000115232,ENSG00000240583,ENSG00000157227,ENSG00000108821,ENSG00000113721,ENSG00000019549,ENSG00000168309,ENSG00000174600,ENSG00000157404,ENSG00000115461,ENSG00000142871,ENSG00000154764,ENSG00000122861,ENSG00000150093,ENSG00000105974,ENSG00000133110,ENSG00000154734…
GO:0001568	blood vessel development	7.53355e-11	7.53355e-11	1	ENSG00000164619,ENSG00000134013,ENSG00000171812,ENSG00000123342,ENSG00000106991,ENSG00000138080,ENSG00000113083,ENSG00000020181,ENSG00000120156,ENSG00000118523,ENSG00000164692,ENSG00000142798,ENSG00000161638,ENSG00000102554,ENSG00000069702,ENSG00000240583,ENSG00000157227,ENSG00000108821,ENSG00000113721,ENSG00000130635,ENSG00000004776,ENSG00000142871,ENSG00000154764,ENSG00000164107,ENSG00000150093…
GO:0051272	positive regulation of cellular component movement	1.17043e-10	1.17043e-10	1	ENSG00000106538,ENSG00000020181,ENSG00000162733,ENSG00000161921,ENSG00000120156,ENSG00000115594,ENSG00000124126,ENSG00000161638,ENSG00000115232,ENSG00000240583,ENSG00000157227,ENSG00000108821,ENSG00000113721,ENSG00000019549,ENSG00000168309,ENSG00000174600,ENSG00000157404,ENSG00000115461,ENSG00000142871,ENSG00000154764,ENSG00000122861,ENSG00000150093,ENSG00000105974,ENSG00000133110,ENSG00000154734…
GO:0040017	positive regulation of locomotion	1.28575e-10	1.28575e-10	1	ENSG00000106538,ENSG00000020181,ENSG00000162733,ENSG00000161921,ENSG00000120156,ENSG00000115594,ENSG00000124126,ENSG00000161638,ENSG00000115232,ENSG00000240583,ENSG00000157227,ENSG00000108821,ENSG00000113721,ENSG00000019549,ENSG00000168309,ENSG00000174600,ENSG00000157404,ENSG00000115461,ENSG00000142871,ENSG00000154764,ENSG00000122861,ENSG00000150093,ENSG00000105974,ENSG00000133110,ENSG00000154734…
GO:0048514	blood vessel morphogenesis	4.84434e-09	4.84434e-09	1	ENSG00000164619,ENSG00000134013,ENSG00000171812,ENSG00000123342,ENSG00000106991,ENSG00000138080,ENSG00000113083,ENSG00000020181,ENSG00000120156,ENSG00000118523,ENSG00000142798,ENSG00000161638,ENSG00000102554,ENSG00000069702,ENSG00000240583,ENSG00000157227,ENSG00000113721,ENSG00000004776,ENSG00000142871,ENSG00000154764,ENSG00000164107,ENSG00000150093,ENSG00000105974,ENSG00000154734,ENSG00000176170…
GO:0097435	supramolecular fiber organization	5.58083e-09	5.58083e-09	1	ENSG00000080573,ENSG00000134013,ENSG00000138080,ENSG00000111799,ENSG00000113083,ENSG00000187955,ENSG00000162733,ENSG00000144824,ENSG00000118523,ENSG00000164692,ENSG00000124126,ENSG00000140416,ENSG00000119681,ENSG00000175084,ENSG00000108821,ENSG00000113721,ENSG00000187720,ENSG00000130635,ENSG00000168309,ENSG00000150093,ENSG00000138131,ENSG00000104435,ENSG00000168477,ENSG00000042493,ENSG00000128833…
GO:0001525	angiogenesis	4.98936e-08	4.98936e-08	1	ENSG00000164619,ENSG00000134013,ENSG00000171812,ENSG00000123342,ENSG00000106991,ENSG00000138080,ENSG00000020181,ENSG00000120156,ENSG00000118523,ENSG00000142798,ENSG00000161638,ENSG00000102554,ENSG00000069702,ENSG00000240583,ENSG00000157227,ENSG00000113721,ENSG00000004776,ENSG00000142871,ENSG00000154764,ENSG00000164107,ENSG00000150093,ENSG00000105974,ENSG00000154734,ENSG00000176170,ENSG00000137801
GO:0042060	wound healing	6.5001e-08	6.5001e-08	1	ENSG00000106991,ENSG00000105825,ENSG00000113083,ENSG00000144824,ENSG00000164220,ENSG00000164692,ENSG00000142632,ENSG00000140416,ENSG00000161638,ENSG00000240583,ENSG00000108821,ENSG00000113721,ENSG00000130635,ENSG00000142871,ENSG00000154764,ENSG00000122861,ENSG00000101335,ENSG00000150093,ENSG00000105974,ENSG00000133110,ENSG00000137801,ENSG00000077942,ENSG00000126583,ENSG00000157168,ENSG00000163513…
GO:0035239	tube morphogenesis	7.13678e-08	7.13678e-08	1	ENSG00000164619,ENSG00000134013,ENSG00000171812,ENSG00000123342,ENSG00000106991,ENSG00000138080,ENSG00000113083,ENSG00000020181,ENSG00000120156,ENSG00000118523,ENSG00000142798,ENSG00000161638,ENSG00000102554,ENSG00000069702,ENSG00000240583,ENSG00000157227,ENSG00000113721,ENSG00000004776,ENSG00000142871,ENSG00000154764,ENSG00000164107,ENSG00000150093,ENSG00000105974,ENSG00000154734,ENSG00000176170…
GO:0007160	cell-matrix adhesion	1.0225e-07	1.0225e-07	1	ENSG00000080573,ENSG00000138080,ENSG00000120156,ENSG00000144824,ENSG00000118523,ENSG00000115232,ENSG00000198542,ENSG00000157227,ENSG00000168309,ENSG00000152818,ENSG00000122861,ENSG00000150093,ENSG00000133110,ENSG00000137801,ENSG00000168477,ENSG00000159871,ENSG00000109743,ENSG00000197467
GO:0061448	connective tissue development	1.31546e-07	1.31546e-07	1	ENSG00000134013,ENSG00000113083,ENSG00000118523,ENSG00000143387,ENSG00000068078,ENSG00000170891,ENSG00000108821,ENSG00000113721,ENSG00000130635,ENSG00000019549,ENSG00000142871,ENSG00000154764,ENSG00000164107,ENSG00000139329,ENSG00000163513,ENSG00000116132,ENSG00000182158,ENSG00000101144,ENSG00000197921,ENSG00000149257,ENSG00000143369,ENSG00000188064,ENSG00000114251
GO:0051216	cartilage development	1.77368e-07	1.77368e-07	1	ENSG00000134013,ENSG00000118523,ENSG00000143387,ENSG00000068078,ENSG00000170891,ENSG00000108821,ENSG00000019549,ENSG00000142871,ENSG00000154764,ENSG00000164107,ENSG00000139329,ENSG00000163513,ENSG00000116132,ENSG00000182158,ENSG00000101144,ENSG00000197921,ENSG00000149257,ENSG00000143369,ENSG00000188064,ENSG00000114251
GO:0070848	response to growth factor	1.89287e-07	1.89287e-07	1	ENSG00000164619,ENSG00000101825,ENSG00000106991,ENSG00000138080,ENSG00000113083,ENSG00000020181,ENSG00000118523,ENSG00000164692,ENSG00000163430,ENSG00000166147,ENSG00000068078,ENSG00000161638,ENSG00000173805,ENSG00000119681,ENSG00000069702,ENSG00000136603,ENSG00000108821,ENSG00000168140,ENSG00000113721,ENSG00000019549,ENSG00000142871,ENSG00000154764,ENSG00000105974,ENSG00000133110,ENSG00000176170…
GO:0048598	embryonic morphogenesis	2.50254e-07	2.50254e-07	1	ENSG00000117122,ENSG00000106991,ENSG00000111799,ENSG00000144824,ENSG00000166147,ENSG00000092607,ENSG00000161638,ENSG00000115232,ENSG00000142156,ENSG00000157227,ENSG00000130635,ENSG00000142871,ENSG00000154764,ENSG00000164107,ENSG00000150093,ENSG00000064655,ENSG00000138795,ENSG00000091136,ENSG00000122691,ENSG00000163513,ENSG00000116132,ENSG00000164932,ENSG00000143320,ENSG00000101144,ENSG00000197921…
GO:0010810	regulation of cell-substrate adhesion	3.10577e-07	3.10577e-07	1	ENSG00000138080,ENSG00000120156,ENSG00000144824,ENSG00000124126,ENSG00000161638,ENSG00000157227,ENSG00000108821,ENSG00000168309,ENSG00000152818,ENSG00000142871,ENSG00000122861,ENSG00000205221,ENSG00000133110,ENSG00000137801,ENSG00000077942,ENSG00000100097,ENSG00000109743
GO:0009611	response to wounding	3.17453e-07	3.17453e-07	1	ENSG00000106991,ENSG00000105825,ENSG00000113083,ENSG00000144824,ENSG00000164220,ENSG00000118523,ENSG00000164692,ENSG00000142632,ENSG00000140416,ENSG00000161638,ENSG00000240583,ENSG00000108821,ENSG00000113721,ENSG00000130635,ENSG00000142871,ENSG00000154764,ENSG00000122861,ENSG00000101335,ENSG00000150093,ENSG00000105974,ENSG00000133110,ENSG00000137801,ENSG00000077942,ENSG00000100097,ENSG00000126583…
GO:0071363	cellular response to growth factor stimulus	4.55976e-07	4.55976e-07	1	ENSG00000164619,ENSG00000106991,ENSG00000138080,ENSG00000113083,ENSG00000020181,ENSG00000118523,ENSG00000164692,ENSG00000163430,ENSG00000166147,ENSG00000068078,ENSG00000161638,ENSG00000173805,ENSG00000119681,ENSG00000069702,ENSG00000136603,ENSG00000108821,ENSG00000168140,ENSG00000113721,ENSG00000019549,ENSG00000142871,ENSG00000154764,ENSG00000105974,ENSG00000133110,ENSG00000176170,ENSG00000137801…
GO:0001503	ossification	6.02306e-07	6.02306e-07	1	ENSG00000113083,ENSG00000162733,ENSG00000120156,ENSG00000118523,ENSG00000164692,ENSG00000143387,ENSG00000068078,ENSG00000142156,ENSG00000157227,ENSG00000108821,ENSG00000019549,ENSG00000115461,ENSG00000142871,ENSG00000164107,ENSG00000183160,ENSG00000146674,ENSG00000138795,ENSG00000197467,ENSG00000122691,ENSG00000167460,ENSG00000164932,ENSG00000101144,ENSG00000177706,ENSG00000011028,ENSG00000138829…
GO:0032964	collagen biosynthetic process	7.25223e-07	7.25223e-07	1	ENSG00000106991,ENSG00000138080,ENSG00000118523,ENSG00000108821,ENSG00000113721,ENSG00000130635,ENSG00000142552,ENSG00000110811,ENSG00000065308,ENSG00000116285,ENSG00000149257
GO:0070482	response to oxygen levels	1.40532e-06	1.40532e-06	1	ENSG00000134013,ENSG00000106991,ENSG00000120156,ENSG00000118523,ENSG00000069702,ENSG00000240583,ENSG00000157227,ENSG00000108821,ENSG00000168140,ENSG00000113721,ENSG00000109610,ENSG00000083444,ENSG00000122861,ENSG00000105974,ENSG00000133110,ENSG00000137801,ENSG00000122691,ENSG00000163513,ENSG00000101144,ENSG00000141682,ENSG00000164442,ENSG00000162493,ENSG00000164362,ENSG00000198625,ENSG00000160789…
GO:0085029	extracellular matrix assembly	3.93827e-06	3.93827e-06	1	ENSG00000138080,ENSG00000113083,ENSG00000144824,ENSG00000164692,ENSG00000187720,ENSG00000168477,ENSG00000091136,ENSG00000196878,ENSG00000140092,ENSG00000166482,ENSG00000169604
GO:0060485	mesenchyme development	6.89705e-06	6.89705e-06	1	ENSG00000134013,ENSG00000106991,ENSG00000144824,ENSG00000069702,ENSG00000108821,ENSG00000168140,ENSG00000113721,ENSG00000019549,ENSG00000164107,ENSG00000138795,ENSG00000122691,ENSG00000157168,ENSG00000163513,ENSG00000101144,ENSG00000196154,ENSG00000114251,ENSG00000164442,ENSG00000162493,ENSG00000198625,ENSG00000107796,ENSG00000183072,ENSG00000164690,ENSG00000173068,ENSG00000148204,ENSG00000115414…
GO:0071559	response to transforming growth factor beta	7.44154e-06	7.44154e-06	1	ENSG00000101825,ENSG00000106991,ENSG00000138080,ENSG00000113083,ENSG00000164692,ENSG00000166147,ENSG00000119681,ENSG00000069702,ENSG00000136603,ENSG00000108821,ENSG00000168140,ENSG00000154764,ENSG00000105974,ENSG00000133110,ENSG00000137801
GO:0098609	cell-cell adhesion	8.04253e-06	8.04253e-06	1	ENSG00000135318,ENSG00000171812,ENSG00000187955,ENSG00000163531,ENSG00000253537,ENSG00000179242,ENSG00000161638,ENSG00000250120,ENSG00000115232,ENSG00000135074,ENSG00000157404,ENSG00000142871,ENSG00000101335,ENSG00000150093,ENSG00000105974,ENSG00000136153,ENSG00000130707,ENSG00000184144,ENSG00000168477,ENSG00000100097,ENSG00000138795,ENSG00000197467,ENSG00000091136,ENSG00000172575,ENSG00000157168…
GO:0048729	tissue morphogenesis	1.265e-05	1.265e-05	1	ENSG00000106991,ENSG00000144824,ENSG00000142632,ENSG00000140416,ENSG00000161638,ENSG00000069702,ENSG00000157227,ENSG00000130635,ENSG00000185483,ENSG00000019549,ENSG00000115461,ENSG00000142871,ENSG00000154764,ENSG00000164107,ENSG00000150093,ENSG00000064655,ENSG00000114861,ENSG00000104267,ENSG00000138795,ENSG00000122691,ENSG00000157168,ENSG00000163513,ENSG00000035403,ENSG00000164932,ENSG00000101144…
GO:0030155	regulation of cell adhesion	1.89554e-05	1.89554e-05	1	ENSG00000106991,ENSG00000138080,ENSG00000120156,ENSG00000144824,ENSG00000124126,ENSG00000140416,ENSG00000161638,ENSG00000115232,ENSG00000157227,ENSG00000108821,ENSG00000135074,ENSG00000019549,ENSG00000168309,ENSG00000152818,ENSG00000142871,ENSG00000122861,ENSG00000205221,ENSG00000105974,ENSG00000133110,ENSG00000137801,ENSG00000136153,ENSG00000077942,ENSG00000130707,ENSG00000100097,ENSG00000138795…
GO:0001649	osteoblast differentiation	2.56802e-05	2.56802e-05	1	ENSG00000113083,ENSG00000162733,ENSG00000142156,ENSG00000108821,ENSG00000019549,ENSG00000115461,ENSG00000142871,ENSG00000164107,ENSG00000183160,ENSG00000146674,ENSG00000138795,ENSG00000122691,ENSG00000167460,ENSG00000164932,ENSG00000101144,ENSG00000177706,ENSG00000011028,ENSG00000138829,ENSG00000188064
GO:0036293	response to decreased oxygen levels	2.62901e-05	2.62901e-05	1	ENSG00000134013,ENSG00000106991,ENSG00000120156,ENSG00000118523,ENSG00000069702,ENSG00000240583,ENSG00000157227,ENSG00000168140,ENSG00000109610,ENSG00000083444,ENSG00000122861,ENSG00000105974,ENSG00000133110,ENSG00000137801,ENSG00000122691,ENSG00000163513,ENSG00000101144,ENSG00000141682,ENSG00000164442,ENSG00000164362,ENSG00000198625,ENSG00000160789,ENSG00000007171,ENSG00000185624,ENSG00000153234…
GO:0120035	regulation of plasma membrane bounded cell projection organization	4.62198e-05	4.62198e-05	1	ENSG00000116741,ENSG00000141837,ENSG00000124126,ENSG00000167178,ENSG00000002746,ENSG00000179242,ENSG00000102554,ENSG00000173805,ENSG00000204099,ENSG00000240583,ENSG00000136603,ENSG00000185483,ENSG00000157404,ENSG00000154764,ENSG00000105974,ENSG00000104435,ENSG00000081923,ENSG00000184144,ENSG00000100097,ENSG00000162490,ENSG00000116132,ENSG00000182158,ENSG00000277586,ENSG00000143320,ENSG00000075651…
GO:0071560	cellular response to transforming growth factor beta stimulus	4.63943e-05	4.63943e-05	1	ENSG00000106991,ENSG00000138080,ENSG00000113083,ENSG00000164692,ENSG00000166147,ENSG00000119681,ENSG00000069702,ENSG00000136603,ENSG00000108821,ENSG00000168140,ENSG00000154764,ENSG00000105974,ENSG00000133110,ENSG00000137801
GO:0001704	formation of primary germ layer	4.85576e-05	4.85576e-05	1	ENSG00000111799,ENSG00000161638,ENSG00000115232,ENSG00000142156,ENSG00000157227,ENSG00000130635,ENSG00000150093,ENSG00000064655,ENSG00000138795,ENSG00000091136,ENSG00000101144,ENSG00000196878,ENSG00000114251,ENSG00000144810,ENSG00000148204,ENSG00000115414
GO:0001666	response to hypoxia	5.05018e-05	5.05018e-05	1	ENSG00000134013,ENSG00000106991,ENSG00000120156,ENSG00000069702,ENSG00000240583,ENSG00000157227,ENSG00000168140,ENSG00000109610,ENSG00000083444,ENSG00000122861,ENSG00000105974,ENSG00000133110,ENSG00000137801,ENSG00000122691,ENSG00000163513,ENSG00000101144,ENSG00000141682,ENSG00000164442,ENSG00000164362,ENSG00000198625,ENSG00000160789,ENSG00000007171,ENSG00000185624,ENSG00000153234,ENSG00000120899…
GO:0031344	regulation of cell projection organization	5.95376e-05	5.95376e-05	1	ENSG00000116741,ENSG00000141837,ENSG00000124126,ENSG00000167178,ENSG00000002746,ENSG00000179242,ENSG00000102554,ENSG00000173805,ENSG00000204099,ENSG00000240583,ENSG00000136603,ENSG00000185483,ENSG00000157404,ENSG00000154764,ENSG00000105974,ENSG00000104435,ENSG00000081923,ENSG00000184144,ENSG00000100097,ENSG00000162490,ENSG00000116132,ENSG00000182158,ENSG00000277586,ENSG00000143320,ENSG00000075651…
GO:0007517	muscle organ development	5.96464e-05	5.96464e-05	1	ENSG00000106991,ENSG00000113083,ENSG00000140416,ENSG00000121577,ENSG00000102554,ENSG00000069702,ENSG00000136603,ENSG00000163359,ENSG00000152818,ENSG00000105974,ENSG00000130707,ENSG00000149591,ENSG00000138795,ENSG00000122691,ENSG00000157168,ENSG00000114251,ENSG00000181790,ENSG00000164442,ENSG00000160789,ENSG00000183072,ENSG00000164690,ENSG00000100219,ENSG00000162772,ENSG00000168542,ENSG00000113070…
GO:0035987	endodermal cell differentiation	8.8939e-05	8.8939e-05	1	ENSG00000111799,ENSG00000161638,ENSG00000115232,ENSG00000142156,ENSG00000157227,ENSG00000130635,ENSG00000091136,ENSG00000196878,ENSG00000144810,ENSG00000115414
GO:0061061	muscle structure development	0.000100604	0.000100604	1	ENSG00000106991,ENSG00000128591,ENSG00000113083,ENSG00000116741,ENSG00000140416,ENSG00000121577,ENSG00000102554,ENSG00000069702,ENSG00000136603,ENSG00000157227,ENSG00000113721,ENSG00000163359,ENSG00000152818,ENSG00000157404,ENSG00000115461,ENSG00000150093,ENSG00000257315,ENSG00000105974,ENSG00000183160,ENSG00000130707,ENSG00000149591,ENSG00000146674,ENSG00000100097,ENSG00000138795,ENSG00000122691…
GO:0007423	sensory organ development	0.000159246	0.000159246	1	ENSG00000164619,ENSG00000117122,ENSG00000171812,ENSG00000166147,ENSG00000181291,ENSG00000170891,ENSG00000240583,ENSG00000136603,ENSG00000113721,ENSG00000130635,ENSG00000185483,ENSG00000157404,ENSG00000154764,ENSG00000164107,ENSG00000081923,ENSG00000138795,ENSG00000122691,ENSG00000069188,ENSG00000163513,ENSG00000116132,ENSG00000164932,ENSG00000101144,ENSG00000197921,ENSG00000138829,ENSG00000188064…
GO:0043627	response to estrogen	0.000189103	0.000189103	1	ENSG00000120156,ENSG00000240583,ENSG00000157227,ENSG00000113721,ENSG00000154764,ENSG00000105974,ENSG00000104267,ENSG00000163513,ENSG00000179862,ENSG00000130429,ENSG00000164442
GO:0048592	eye morphogenesis	0.000197741	0.000197741	1	ENSG00000117122,ENSG00000171812,ENSG00000166147,ENSG00000240583,ENSG00000130635,ENSG00000122691,ENSG00000069188,ENSG00000101144,ENSG00000138829,ENSG00000114251,ENSG00000164442,ENSG00000137936,ENSG00000197614,ENSG00000133216,ENSG00000176842,ENSG00000144810,ENSG00000184254
GO:0060348	bone development	0.000209645	0.000209645	1	ENSG00000106991,ENSG00000113083,ENSG00000120156,ENSG00000166147,ENSG00000068078,ENSG00000157227,ENSG00000108821,ENSG00000157404,ENSG00000183160,ENSG00000114861,ENSG00000197467,ENSG00000122691,ENSG00000163513,ENSG00000177706,ENSG00000149257,ENSG00000117385,ENSG00000164442
GO:0014070	response to organic cyclic compound	0.000209929	0.000209929	1	ENSG00000123342,ENSG00000106991,ENSG00000113083,ENSG00000120156,ENSG00000118523,ENSG00000113749,ENSG00000158270,ENSG00000102554,ENSG00000240583,ENSG00000157227,ENSG00000108821,ENSG00000113721,ENSG00000147872,ENSG00000019549,ENSG00000168309,ENSG00000115461,ENSG00000154764,ENSG00000105974,ENSG00000133110,ENSG00000137801,ENSG00000130707,ENSG00000135824,ENSG00000100097,ENSG00000114861,ENSG00000104267…
GO:0090092	regulation of transmembrane receptor protein serine/threonine kinase signaling pathway	0.00021033	0.00021033	1	ENSG00000164619,ENSG00000106991,ENSG00000138080,ENSG00000113083,ENSG00000163430,ENSG00000166147,ENSG00000069702,ENSG00000136603,ENSG00000168140,ENSG00000142871,ENSG00000105974,ENSG00000137801,ENSG00000163513,ENSG00000101144,ENSG00000197921,ENSG00000138829,ENSG00000114251,ENSG00000164442,ENSG00000164690,ENSG00000100219,ENSG00000148204,ENSG00000101665,ENSG00000158747
GO:0048048	embryonic eye morphogenesis	0.000226211	0.000226211	1	ENSG00000117122,ENSG00000166147,ENSG00000122691,ENSG00000101144,ENSG00000138829,ENSG00000114251,ENSG00000164442,ENSG00000197614,ENSG00000184254
GO:0090287	regulation of cellular response to growth factor stimulus	0.000261263	0.000261263	1	ENSG00000164619,ENSG00000106991,ENSG00000138080,ENSG00000113083,ENSG00000020181,ENSG00000163430,ENSG00000166147,ENSG00000161638,ENSG00000069702,ENSG00000136603,ENSG00000168140,ENSG00000142871,ENSG00000105974,ENSG00000137801,ENSG00000197879,ENSG00000163513,ENSG00000197921,ENSG00000177706,ENSG00000138829,ENSG00000114251,ENSG00000164442
GO:0000904	cell morphogenesis involved in differentiation	0.000303441	0.000303441	1	ENSG00000120156,ENSG00000113749,ENSG00000141837,ENSG00000163531,ENSG00000135862,ENSG00000124126,ENSG00000167178,ENSG00000002746,ENSG00000179242,ENSG00000115232,ENSG00000136603,ENSG00000154764,ENSG00000150093,ENSG00000133110,ENSG00000077942,ENSG00000184144,ENSG00000185070,ENSG00000138795,ENSG00000091136,ENSG00000112137,ENSG00000162490,ENSG00000035403,ENSG00000277586,ENSG00000143320,ENSG00000101144…
GO:0048568	embryonic organ development	0.000346801	0.000346801	1	ENSG00000117122,ENSG00000106991,ENSG00000106538,ENSG00000166147,ENSG00000092607,ENSG00000181649,ENSG00000157227,ENSG00000113721,ENSG00000157404,ENSG00000142871,ENSG00000164107,ENSG00000138795,ENSG00000197467,ENSG00000122691,ENSG00000163513,ENSG00000116132,ENSG00000164932,ENSG00000101144,ENSG00000138829,ENSG00000188064,ENSG00000114251,ENSG00000164442,ENSG00000183072,ENSG00000164690,ENSG00000197614…
GO:0045597	positive regulation of cell differentiation	0.000418819	0.000418819	1	ENSG00000134013,ENSG00000106991,ENSG00000106538,ENSG00000162733,ENSG00000118523,ENSG00000124126,ENSG00000167178,ENSG00000179242,ENSG00000102554,ENSG00000173805,ENSG00000136603,ENSG00000157227,ENSG00000108821,ENSG00000019549,ENSG00000174600,ENSG00000157404,ENSG00000142871,ENSG00000183160,ENSG00000146674,ENSG00000104267,ENSG00000138795,ENSG00000172575,ENSG00000122691,ENSG00000157168,ENSG00000163513…
GO:0034330	cell junction organization	0.000493114	0.000493114	1	ENSG00000128591,ENSG00000120156,ENSG00000144824,ENSG00000141837,ENSG00000163531,ENSG00000135862,ENSG00000179242,ENSG00000161638,ENSG00000157227,ENSG00000019549,ENSG00000168309,ENSG00000152818,ENSG00000154764,ENSG00000105974,ENSG00000137801,ENSG00000184144,ENSG00000185070,ENSG00000110841,ENSG00000132692,ENSG00000157168,ENSG00000069188,ENSG00000197879,ENSG00000128805,ENSG00000035403,ENSG00000277586…
GO:0048762	mesenchymal cell differentiation	0.000549907	0.000549907	1	ENSG00000134013,ENSG00000106991,ENSG00000144824,ENSG00000069702,ENSG00000108821,ENSG00000168140,ENSG00000019549,ENSG00000164107,ENSG00000138795,ENSG00000122691,ENSG00000157168,ENSG00000163513,ENSG00000101144,ENSG00000196154,ENSG00000114251,ENSG00000164442,ENSG00000162493,ENSG00000164690,ENSG00000148204,ENSG00000115414,ENSG00000101665
GO:0001706	endoderm formation	0.000560533	0.000560533	1	ENSG00000111799,ENSG00000161638,ENSG00000115232,ENSG00000142156,ENSG00000157227,ENSG00000130635,ENSG00000091136,ENSG00000196878,ENSG00000144810,ENSG00000115414
GO:0007369	gastrulation	0.000662777	0.000662777	1	ENSG00000111799,ENSG00000144824,ENSG00000161638,ENSG00000115232,ENSG00000142156,ENSG00000157227,ENSG00000130635,ENSG00000150093,ENSG00000064655,ENSG00000138795,ENSG00000091136,ENSG00000163513,ENSG00000101144,ENSG00000196878,ENSG00000114251,ENSG00000144810,ENSG00000148204,ENSG00000115414
GO:0061383	trabecula morphogenesis	0.000715652	0.000715652	1	ENSG00000106991,ENSG00000120156,ENSG00000069702,ENSG00000108821,ENSG00000154734,ENSG00000157168,ENSG00000101144,ENSG00000138829,ENSG00000183072
GO:0048705	skeletal system morphogenesis	0.00081541	0.00081541	1	ENSG00000120156,ENSG00000118523,ENSG00000068078,ENSG00000092607,ENSG00000157227,ENSG00000108821,ENSG00000113721,ENSG00000154764,ENSG00000183160,ENSG00000197467,ENSG00000122691,ENSG00000163513,ENSG00000116132,ENSG00000101144,ENSG00000149257,ENSG00000138829,ENSG00000164442
GO:0007178	transmembrane receptor protein serine/threonine kinase signaling pathway	0.000876902	0.000876902	1	ENSG00000164619,ENSG00000106991,ENSG00000138080,ENSG00000113083,ENSG00000164692,ENSG00000163430,ENSG00000166147,ENSG00000119681,ENSG00000069702,ENSG00000136603,ENSG00000168140,ENSG00000142871,ENSG00000105974,ENSG00000137801,ENSG00000138795,ENSG00000163513,ENSG00000101144,ENSG00000197921,ENSG00000138829,ENSG00000114251,ENSG00000164442,ENSG00000164690,ENSG00000100219,ENSG00000148204,ENSG00000168542…
GO:0010812	negative regulation of cell-substrate adhesion	0.000891513	0.000891513	1	ENSG00000144824,ENSG00000157227,ENSG00000108821,ENSG00000168309,ENSG00000133110,ENSG00000137801,ENSG00000077942,ENSG00000100097
GO:0010975	regulation of neuron projection development	0.000908028	0.000908028	1	ENSG00000116741,ENSG00000141837,ENSG00000124126,ENSG00000167178,ENSG00000002746,ENSG00000179242,ENSG00000204099,ENSG00000136603,ENSG00000185483,ENSG00000154764,ENSG00000104435,ENSG00000184144,ENSG00000100097,ENSG00000162490,ENSG00000116132,ENSG00000182158,ENSG00000277586,ENSG00000143320,ENSG00000101144,ENSG00000163536,ENSG00000114251,ENSG00000117385,ENSG00000138411,ENSG00000130203,ENSG00000129244…
GO:0003007	heart morphogenesis	0.000953217	0.000953217	1	ENSG00000106991,ENSG00000120156,ENSG00000140416,ENSG00000069702,ENSG00000130635,ENSG00000019549,ENSG00000142871,ENSG00000164107,ENSG00000154734,ENSG00000185070,ENSG00000122691,ENSG00000157168,ENSG00000163513,ENSG00000101144,ENSG00000114251,ENSG00000164442,ENSG00000198625,ENSG00000183072,ENSG00000164690,ENSG00000101665,ENSG00000126778,ENSG00000133816
GO:0034329	cell junction assembly	0.000995432	0.000995432	1	ENSG00000128591,ENSG00000120156,ENSG00000144824,ENSG00000141837,ENSG00000163531,ENSG00000135862,ENSG00000161638,ENSG00000157227,ENSG00000019549,ENSG00000168309,ENSG00000154764,ENSG00000105974,ENSG00000137801,ENSG00000185070,ENSG00000157168,ENSG00000069188,ENSG00000197879,ENSG00000035403,ENSG00000158258,ENSG00000196878,ENSG00000114251,ENSG00000181790,ENSG00000120899,ENSG00000113209,ENSG00000133216…
GO:0001837	epithelial to mesenchymal transition	0.00100488	0.00100488	1	ENSG00000134013,ENSG00000106991,ENSG00000144824,ENSG00000069702,ENSG00000108821,ENSG00000168140,ENSG00000019549,ENSG00000138795,ENSG00000122691,ENSG00000163513,ENSG00000101144,ENSG00000196154,ENSG00000114251,ENSG00000162493
GO:0045785	positive regulation of cell adhesion	0.00105501	0.00105501	1	ENSG00000138080,ENSG00000120156,ENSG00000124126,ENSG00000140416,ENSG00000161638,ENSG00000115232,ENSG00000135074,ENSG00000152818,ENSG00000142871,ENSG00000205221,ENSG00000105974,ENSG00000077942,ENSG00000100097,ENSG00000138795,ENSG00000172575,ENSG00000157168,ENSG00000163513,ENSG00000101144,ENSG00000114251,ENSG00000164442,ENSG00000162493,ENSG00000185624,ENSG00000120899,ENSG00000164690,ENSG00000100219…
GO:0060021	roof of mouth development	0.00117847	0.00117847	1	ENSG00000069702,ENSG00000019549,ENSG00000154764,ENSG00000164107,ENSG00000138795,ENSG00000122691,ENSG00000163513,ENSG00000116132,ENSG00000114251,ENSG00000164690,ENSG00000173068,ENSG00000133216
GO:0022617	extracellular matrix disassembly	0.00118819	0.00118819	1	ENSG00000123342,ENSG00000106991,ENSG00000162733,ENSG00000143387,ENSG00000135862,ENSG00000157227,ENSG00000158859
GO:0072132	mesenchyme morphogenesis	0.00124472	0.00124472	1	ENSG00000106991,ENSG00000019549,ENSG00000138795,ENSG00000122691,ENSG00000163513,ENSG00000101144,ENSG00000114251,ENSG00000198625,ENSG00000107796
GO:0001958	endochondral ossification	0.00134301	0.00134301	1	ENSG00000120156,ENSG00000068078,ENSG00000157227,ENSG00000108821,ENSG00000183160,ENSG00000197467
GO:0036075	replacement ossification	0.00134301	0.00134301	1	ENSG00000120156,ENSG00000068078,ENSG00000157227,ENSG00000108821,ENSG00000183160,ENSG00000197467
GO:0048562	embryonic organ morphogenesis	0.00163733	0.00163733	1	ENSG00000117122,ENSG00000106991,ENSG00000166147,ENSG00000092607,ENSG00000157227,ENSG00000164107,ENSG00000122691,ENSG00000163513,ENSG00000116132,ENSG00000164932,ENSG00000101144,ENSG00000138829,ENSG00000114251,ENSG00000164442,ENSG00000183072,ENSG00000164690,ENSG00000197614,ENSG00000133216,ENSG00000176842,ENSG00000148204,ENSG00000184254,ENSG00000126778,ENSG00000133816,ENSG00000105996
GO:0009725	response to hormone	0.00178811	0.00178811	1	ENSG00000123342,ENSG00000106991,ENSG00000106538,ENSG00000113083,ENSG00000120156,ENSG00000118523,ENSG00000166147,ENSG00000069702,ENSG00000240583,ENSG00000157227,ENSG00000108821,ENSG00000113721,ENSG00000168309,ENSG00000157404,ENSG00000115461,ENSG00000154764,ENSG00000105974,ENSG00000137801,ENSG00000130707,ENSG00000114861,ENSG00000104267,ENSG00000138795,ENSG00000197879,ENSG00000163513,ENSG00000115884…
GO:0007492	endoderm development	0.00180943	0.00180943	1	ENSG00000111799,ENSG00000135862,ENSG00000161638,ENSG00000115232,ENSG00000142156,ENSG00000157227,ENSG00000130635
GO:0007179	transforming growth factor beta receptor signaling pathway	0.00210373	0.00210373	1	ENSG00000106991,ENSG00000138080,ENSG00000113083,ENSG00000164692,ENSG00000166147,ENSG00000119681,ENSG00000069702,ENSG00000136603,ENSG00000168140,ENSG00000105974,ENSG00000137801
GO:0017015	regulation of transforming growth factor beta receptor signaling pathway	0.00242178	0.00242178	1	ENSG00000106991,ENSG00000138080,ENSG00000113083,ENSG00000166147,ENSG00000069702,ENSG00000136603,ENSG00000168140,ENSG00000105974,ENSG00000137801
GO:0003206	cardiac chamber morphogenesis	0.00267917	0.00267917	1	ENSG00000106991,ENSG00000120156,ENSG00000140416,ENSG00000069702,ENSG00000142871,ENSG00000164107,ENSG00000154734,ENSG00000157168,ENSG00000163513,ENSG00000101144,ENSG00000114251,ENSG00000164442,ENSG00000183072
GO:1903844	regulation of cellular response to transforming growth factor beta stimulus	0.00292954	0.00292954	1	ENSG00000106991,ENSG00000138080,ENSG00000113083,ENSG00000166147,ENSG00000069702,ENSG00000136603,ENSG00000168140,ENSG00000105974,ENSG00000137801
GO:0045766	positive regulation of angiogenesis	0.00297318	0.00297318	1	ENSG00000164619,ENSG00000106991,ENSG00000120156,ENSG00000161638,ENSG00000240583,ENSG00000004776,ENSG00000150093,ENSG00000176170,ENSG00000137801,ENSG00000122691,ENSG00000163513,ENSG00000143369,ENSG00000114251,ENSG00000164362,ENSG00000120899,ENSG00000100219
GO:1904018	positive regulation of vasculature development	0.00297318	0.00297318	1	ENSG00000164619,ENSG00000106991,ENSG00000120156,ENSG00000161638,ENSG00000240583,ENSG00000004776,ENSG00000150093,ENSG00000176170,ENSG00000137801,ENSG00000122691,ENSG00000163513,ENSG00000143369,ENSG00000114251,ENSG00000164362,ENSG00000120899,ENSG00000100219
GO:0033627	cell adhesion mediated by integrin	0.00298197	0.00298197	1	ENSG00000166147,ENSG00000161638,ENSG00000115232,ENSG00000198542,ENSG00000019549,ENSG00000122861,ENSG00000150093
GO:0010718	positive regulation of epithelial to mesenchymal transition	0.00302665	0.00302665	1	ENSG00000134013,ENSG00000106991,ENSG00000108821,ENSG00000138795,ENSG00000122691,ENSG00000163513,ENSG00000101144,ENSG00000162493,ENSG00000148204
GO:0044319	wound healing, spreading of cells	0.00379692	0.00379692	1	ENSG00000144824,ENSG00000161638,ENSG00000130635,ENSG00000142871,ENSG00000154764,ENSG00000162493,ENSG00000113070,ENSG00000138639
GO:0090505	epiboly involved in wound healing	0.00379692	0.00379692	1	ENSG00000144824,ENSG00000161638,ENSG00000130635,ENSG00000142871,ENSG00000154764,ENSG00000162493,ENSG00000113070,ENSG00000138639
GO:0002011	morphogenesis of an epithelial sheet	0.00411101	0.00411101	1	ENSG00000144824,ENSG00000161638,ENSG00000130635,ENSG00000142871,ENSG00000154764,ENSG00000101144,ENSG00000114251,ENSG00000162493,ENSG00000113070,ENSG00000138639
GO:0060350	endochondral bone morphogenesis	0.00418004	0.00418004	1	ENSG00000120156,ENSG00000068078,ENSG00000157227,ENSG00000108821,ENSG00000183160,ENSG00000197467,ENSG00000163513,ENSG00000149257
GO:0048880	sensory system development	0.00447905	0.00447905	1	ENSG00000117122,ENSG00000171812,ENSG00000166147,ENSG00000181291,ENSG00000240583,ENSG00000136603,ENSG00000113721,ENSG00000130635,ENSG00000154764,ENSG00000122691,ENSG00000069188,ENSG00000163513,ENSG00000101144,ENSG00000197921,ENSG00000138829,ENSG00000188064,ENSG00000114251,ENSG00000164442,ENSG00000137936,ENSG00000164690,ENSG00000197614,ENSG00000133216,ENSG00000176842,ENSG00000144810,ENSG00000184254…
GO:0030282	bone mineralization	0.00472499	0.00472499	1	ENSG00000113083,ENSG00000162733,ENSG00000164692,ENSG00000068078,ENSG00000142871,ENSG00000183160,ENSG00000122691,ENSG00000101144,ENSG00000177706,ENSG00000138829,ENSG00000143369,ENSG00000120899
GO:0002009	morphogenesis of an epithelium	0.00476589	0.00476589	1	ENSG00000106991,ENSG00000144824,ENSG00000142632,ENSG00000161638,ENSG00000157227,ENSG00000130635,ENSG00000185483,ENSG00000019549,ENSG00000115461,ENSG00000142871,ENSG00000154764,ENSG00000164107,ENSG00000114861,ENSG00000104267,ENSG00000138795,ENSG00000122691,ENSG00000163513,ENSG00000035403,ENSG00000164932,ENSG00000101144,ENSG00000197921,ENSG00000126562,ENSG00000188064,ENSG00000114251,ENSG00000164442…
GO:0090504	epiboly	0.00477946	0.00477946	1	ENSG00000144824,ENSG00000161638,ENSG00000130635,ENSG00000142871,ENSG00000154764,ENSG00000162493,ENSG00000113070,ENSG00000138639
GO:0045667	regulation of osteoblast differentiation	0.00529418	0.00529418	1	ENSG00000162733,ENSG00000019549,ENSG00000115461,ENSG00000142871,ENSG00000164107,ENSG00000183160,ENSG00000122691,ENSG00000164932,ENSG00000101144,ENSG00000177706,ENSG00000138829,ENSG00000188064
GO:0048545	response to steroid hormone	0.00570283	0.00570283	1	ENSG00000106991,ENSG00000113083,ENSG00000118523,ENSG00000240583,ENSG00000108821,ENSG00000168309,ENSG00000105974,ENSG00000137801,ENSG00000130707,ENSG00000114861,ENSG00000104267,ENSG00000138795,ENSG00000163513,ENSG00000115884,ENSG00000277586,ENSG00000197256,ENSG00000101144,ENSG00000116285,ENSG00000188064,ENSG00000163453,ENSG00000103740
GO:0051093	negative regulation of developmental process	0.00575292	0.00575292	1	ENSG00000134013,ENSG00000138080,ENSG00000116741,ENSG00000120156,ENSG00000143387,ENSG00000170075,ENSG00000142798,ENSG00000166147,ENSG00000068078,ENSG00000136603,ENSG00000168140,ENSG00000130635,ENSG00000019549,ENSG00000115461,ENSG00000154764,ENSG00000164107,ENSG00000150093,ENSG00000257315,ENSG00000105974,ENSG00000133110,ENSG00000154734,ENSG00000137801,ENSG00000077942,ENSG00000183160,ENSG00000184144…
GO:0048146	positive regulation of fibroblast proliferation	0.00580902	0.00580902	1	ENSG00000162733,ENSG00000240583,ENSG00000113721,ENSG00000176170,ENSG00000077942,ENSG00000075426,ENSG00000114251,ENSG00000115414,ENSG00000135446
GO:0034405	response to fluid shear stress	0.00623536	0.00623536	1	ENSG00000105825,ENSG00000113721,ENSG00000130707,ENSG00000104267,ENSG00000164442,ENSG00000120899,ENSG00000100219,ENSG00000101665
GO:0034446	substrate adhesion-dependent cell spreading	0.00694941	0.00694941	1	ENSG00000120156,ENSG00000135862,ENSG00000124126,ENSG00000115232,ENSG00000133110,ENSG00000077942,ENSG00000091136,ENSG00000196878,ENSG00000162493,ENSG00000185624,ENSG00000169604,ENSG00000115414,ENSG00000114646
GO:0061384	heart trabecula morphogenesis	0.00698301	0.00698301	1	ENSG00000106991,ENSG00000120156,ENSG00000069702,ENSG00000154734,ENSG00000157168,ENSG00000101144,ENSG00000183072
GO:0090066	regulation of anatomical structure size	0.00790678	0.00790678	1	ENSG00000116741,ENSG00000113749,ENSG00000124126,ENSG00000167178,ENSG00000179242,ENSG00000240583,ENSG00000154764,ENSG00000105974,ENSG00000184144,ENSG00000042493,ENSG00000254585,ENSG00000162490,ENSG00000197879,ENSG00000277586,ENSG00000143320,ENSG00000130429,ENSG00000151491,ENSG00000188064,ENSG00000114251,ENSG00000144596,ENSG00000130203,ENSG00000107796,ENSG00000120899,ENSG00000136059,ENSG00000134278…
GO:0060537	muscle tissue development	0.00816614	0.00816614	1	ENSG00000106991,ENSG00000113083,ENSG00000116741,ENSG00000140416,ENSG00000121577,ENSG00000102554,ENSG00000069702,ENSG00000136603,ENSG00000113721,ENSG00000115461,ENSG00000150093,ENSG00000105974,ENSG00000064655,ENSG00000138795,ENSG00000122691,ENSG00000157168,ENSG00000163513,ENSG00000101144,ENSG00000114251,ENSG00000164442,ENSG00000160789,ENSG00000183072,ENSG00000164690,ENSG00000162772,ENSG00000168542…
GO:0008284	positive regulation of cell population proliferation	0.0085735	0.0085735	1	ENSG00000162733,ENSG00000120156,ENSG00000118523,ENSG00000170075,ENSG00000135862,ENSG00000068078,ENSG00000102554,ENSG00000115232,ENSG00000069702,ENSG00000240583,ENSG00000113721,ENSG00000157404,ENSG00000115461,ENSG00000142871,ENSG00000154764,ENSG00000150093,ENSG00000154734,ENSG00000176170,ENSG00000137801,ENSG00000077942,ENSG00000183160,ENSG00000114861,ENSG00000138795,ENSG00000109743,ENSG00000091136…
GO:0045765	regulation of angiogenesis	0.00878576	0.00878576	1	ENSG00000164619,ENSG00000106991,ENSG00000138080,ENSG00000020181,ENSG00000120156,ENSG00000142798,ENSG00000161638,ENSG00000240583,ENSG00000004776,ENSG00000150093,ENSG00000154734,ENSG00000176170,ENSG00000137801,ENSG00000122691,ENSG00000163513,ENSG00000143369,ENSG00000114251,ENSG00000181790,ENSG00000140092,ENSG00000164362,ENSG00000120899,ENSG00000100219
GO:0050673	epithelial cell proliferation	0.00888884	0.00888884	1	ENSG00000164619,ENSG00000134013,ENSG00000171812,ENSG00000106991,ENSG00000120156,ENSG00000135862,ENSG00000115232,ENSG00000069702,ENSG00000157227,ENSG00000019549,ENSG00000157404,ENSG00000115461,ENSG00000154764,ENSG00000105974,ENSG00000137801,ENSG00000146674,ENSG00000091136,ENSG00000122691
GO:0001654	eye development	0.00919565	0.00919565	1	ENSG00000117122,ENSG00000171812,ENSG00000166147,ENSG00000240583,ENSG00000136603,ENSG00000113721,ENSG00000130635,ENSG00000154764,ENSG00000122691,ENSG00000069188,ENSG00000163513,ENSG00000101144,ENSG00000197921,ENSG00000138829,ENSG00000188064,ENSG00000114251,ENSG00000164442,ENSG00000137936,ENSG00000164690,ENSG00000197614,ENSG00000133216,ENSG00000176842,ENSG00000144810,ENSG00000184254,ENSG00000135446
GO:0050900	leukocyte migration	0.00943343	0.00943343	1	ENSG00000138080,ENSG00000106538,ENSG00000161921,ENSG00000120156,ENSG00000164692,ENSG00000115594,ENSG00000124126,ENSG00000161638,ENSG00000115232,ENSG00000157227,ENSG00000108821,ENSG00000174600,ENSG00000157404,ENSG00000150093,ENSG00000105974,ENSG00000137801
GO:0042476	odontogenesis	0.00954315	0.00954315	1	ENSG00000164692,ENSG00000240583,ENSG00000108821,ENSG00000164107,ENSG00000104267,ENSG00000138795,ENSG00000091136,ENSG00000122691,ENSG00000115884,ENSG00000101144,ENSG00000177706
GO:0030510	regulation of BMP signaling pathway	0.0104783	0.0104783	1	ENSG00000164619,ENSG00000106991,ENSG00000163430,ENSG00000166147,ENSG00000136603,ENSG00000142871,ENSG00000105974,ENSG00000197921,ENSG00000114251,ENSG00000148204,ENSG00000101665,ENSG00000158747
GO:0150063	visual system development	0.0109576	0.0109576	1	ENSG00000117122,ENSG00000171812,ENSG00000166147,ENSG00000240583,ENSG00000136603,ENSG00000113721,ENSG00000130635,ENSG00000154764,ENSG00000122691,ENSG00000069188,ENSG00000163513,ENSG00000101144,ENSG00000197921,ENSG00000138829,ENSG00000188064,ENSG00000114251,ENSG00000164442,ENSG00000137936,ENSG00000164690,ENSG00000197614,ENSG00000133216,ENSG00000176842,ENSG00000144810,ENSG00000184254,ENSG00000135446
GO:1901342	regulation of vasculature development	0.0109605	0.0109605	1	ENSG00000164619,ENSG00000106991,ENSG00000138080,ENSG00000020181,ENSG00000120156,ENSG00000142798,ENSG00000161638,ENSG00000240583,ENSG00000004776,ENSG00000150093,ENSG00000154734,ENSG00000176170,ENSG00000137801,ENSG00000122691,ENSG00000163513,ENSG00000143369,ENSG00000114251,ENSG00000181790,ENSG00000140092,ENSG00000164362,ENSG00000120899,ENSG00000100219
GO:0030512	negative regulation of transforming growth factor beta receptor signaling pathway	0.0116903	0.0116903	1	ENSG00000106991,ENSG00000138080,ENSG00000166147,ENSG00000069702,ENSG00000136603,ENSG00000168140,ENSG00000105974
GO:0035988	chondrocyte proliferation	0.0117323	0.0117323	1	ENSG00000162733,ENSG00000118523,ENSG00000068078,ENSG00000157227
GO:0001952	regulation of cell-matrix adhesion	0.0120353	0.0120353	1	ENSG00000120156,ENSG00000144824,ENSG00000157227,ENSG00000168309,ENSG00000152818,ENSG00000122861,ENSG00000133110,ENSG00000137801,ENSG00000109743,ENSG00000035403
GO:0044087	regulation of cellular component biogenesis	0.0120501	0.0120501	1	ENSG00000138080,ENSG00000120156,ENSG00000144824,ENSG00000118523,ENSG00000144843,ENSG00000124126,ENSG00000140416,ENSG00000102554,ENSG00000173805,ENSG00000240583,ENSG00000157227,ENSG00000019549,ENSG00000168309,ENSG00000157404,ENSG00000142871,ENSG00000154764,ENSG00000105974,ENSG00000176170,ENSG00000137801,ENSG00000104435,ENSG00000081923,ENSG00000185070,ENSG00000042493,ENSG00000157168,ENSG00000254585…
GO:0010717	regulation of epithelial to mesenchymal transition	0.0133757	0.0133757	1	ENSG00000134013,ENSG00000106991,ENSG00000144824,ENSG00000108821,ENSG00000168140,ENSG00000138795,ENSG00000122691,ENSG00000163513,ENSG00000101144,ENSG00000162493,ENSG00000148204,ENSG00000101665
GO:0001570	vasculogenesis	0.0136097	0.0136097	1	ENSG00000106991,ENSG00000069702,ENSG00000113721,ENSG00000154764,ENSG00000105974,ENSG00000163513,ENSG00000188064,ENSG00000164442,ENSG00000183072,ENSG00000164690
GO:0003205	cardiac chamber development	0.0139192	0.0139192	1	ENSG00000106991,ENSG00000120156,ENSG00000140416,ENSG00000069702,ENSG00000142871,ENSG00000164107,ENSG00000154734,ENSG00000157168,ENSG00000163513,ENSG00000101144,ENSG00000114251,ENSG00000164442,ENSG00000198625,ENSG00000183072
GO:0090101	negative regulation of transmembrane receptor protein serine/threonine kinase signaling pathway	0.0141238	0.0141238	1	ENSG00000164619,ENSG00000106991,ENSG00000138080,ENSG00000166147,ENSG00000069702,ENSG00000136603,ENSG00000168140,ENSG00000105974,ENSG00000163513,ENSG00000138829,ENSG00000114251,ENSG00000100219,ENSG00000101665,ENSG00000158747
GO:0060343	trabecula formation	0.0142836	0.0142836	1	ENSG00000120156,ENSG00000069702,ENSG00000108821,ENSG00000154734,ENSG00000138829,ENSG00000183072
GO:0071711	basement membrane organization	0.0144909	0.0144909	1	ENSG00000144824,ENSG00000150093,ENSG00000105974,ENSG00000185070,ENSG00000091136,ENSG00000196878
GO:0090596	sensory organ morphogenesis	0.0146364	0.0146364	1	ENSG00000117122,ENSG00000171812,ENSG00000166147,ENSG00000240583,ENSG00000130635,ENSG00000122691,ENSG00000069188,ENSG00000116132,ENSG00000164932,ENSG00000101144,ENSG00000138829,ENSG00000114251,ENSG00000164442,ENSG00000137936,ENSG00000197614,ENSG00000133216,ENSG00000176842,ENSG00000144810,ENSG00000184254,ENSG00000126778,ENSG00000105996
GO:0035313	wound healing, spreading of epidermal cells	0.0146826	0.0146826	1	ENSG00000144824,ENSG00000161638,ENSG00000130635,ENSG00000154764,ENSG00000113070,ENSG00000138639
GO:0060349	bone morphogenesis	0.0146834	0.0146834	1	ENSG00000120156,ENSG00000068078,ENSG00000157227,ENSG00000108821,ENSG00000183160,ENSG00000197467,ENSG00000122691,ENSG00000163513,ENSG00000149257,ENSG00000164442
GO:0030574	collagen catabolic process	0.0147937	0.0147937	1	ENSG00000123342,ENSG00000143387,ENSG00000157227,ENSG00000150093,ENSG00000197467,ENSG00000011028,ENSG00000204291
GO:1903055	positive regulation of extracellular matrix organization	0.0156129	0.0156129	1	ENSG00000138080,ENSG00000162733,ENSG00000144824
GO:0007044	cell-substrate junction assembly	0.0163519	0.0163519	1	ENSG00000120156,ENSG00000144824,ENSG00000135862,ENSG00000161638,ENSG00000157227,ENSG00000168309,ENSG00000137801,ENSG00000035403,ENSG00000196878,ENSG00000120899,ENSG00000115414,ENSG00000072110
GO:0090257	regulation of muscle system process	0.0169031	0.0169031	1	ENSG00000116741,ENSG00000118523,ENSG00000140416,ENSG00000152818,ENSG00000157404,ENSG00000115461,ENSG00000004776,ENSG00000164107,ENSG00000101335,ENSG00000105974,ENSG00000176170
GO:0035113	embryonic appendage morphogenesis	0.0174446	0.0174446	1	ENSG00000154764,ENSG00000164107,ENSG00000138795,ENSG00000122691,ENSG00000116132,ENSG00000143320,ENSG00000101144,ENSG00000144218,ENSG00000138829,ENSG00000114251,ENSG00000253293,ENSG00000164690
GO:0030326	embryonic limb morphogenesis	0.0174446	0.0174446	1	ENSG00000154764,ENSG00000164107,ENSG00000138795,ENSG00000122691,ENSG00000116132,ENSG00000143320,ENSG00000101144,ENSG00000144218,ENSG00000138829,ENSG00000114251,ENSG00000253293,ENSG00000164690
GO:1901888	regulation of cell junction assembly	0.0174474	0.0174474	1	ENSG00000120156,ENSG00000144824,ENSG00000157227,ENSG00000019549,ENSG00000168309,ENSG00000154764,ENSG00000105974,ENSG00000137801,ENSG00000185070,ENSG00000197879,ENSG00000035403,ENSG00000158258,ENSG00000114251,ENSG00000181790,ENSG00000133216,ENSG00000121871
GO:0030509	BMP signaling pathway	0.0187942	0.0187942	1	ENSG00000164619,ENSG00000106991,ENSG00000163430,ENSG00000166147,ENSG00000069702,ENSG00000136603,ENSG00000142871,ENSG00000105974,ENSG00000138795,ENSG00000101144,ENSG00000197921,ENSG00000114251,ENSG00000148204,ENSG00000101665,ENSG00000158747
GO:0042692	muscle cell differentiation	0.0192841	0.0192841	1	ENSG00000106991,ENSG00000128591,ENSG00000113083,ENSG00000116741,ENSG00000140416,ENSG00000121577,ENSG00000102554,ENSG00000157227,ENSG00000113721,ENSG00000157404,ENSG00000115461,ENSG00000150093,ENSG00000257315,ENSG00000183160
GO:0060840	artery development	0.0203919	0.0203919	1	ENSG00000106991,ENSG00000113083,ENSG00000113721,ENSG00000164107,ENSG00000116132,ENSG00000164442,ENSG00000130203,ENSG00000164690,ENSG00000129038,ENSG00000168542,ENSG00000101665,ENSG00000126778
GO:0043069	negative regulation of programmed cell death	0.0209972	0.0209972	1	ENSG00000137331,ENSG00000120156,ENSG00000141837,ENSG00000163430,ENSG00000161638,ENSG00000240583,ENSG00000113721,ENSG00000019549,ENSG00000157404,ENSG00000004776,ENSG00000142871,ENSG00000154764,ENSG00000164107,ENSG00000150093,ENSG00000105974,ENSG00000176170,ENSG00000137801,ENSG00000064655,ENSG00000101188,ENSG00000114861,ENSG00000138795,ENSG00000126583,ENSG00000122691,ENSG00000157168,ENSG00000162490…
GO:0010811	positive regulation of cell-substrate adhesion	0.0217926	0.0217926	1	ENSG00000138080,ENSG00000120156,ENSG00000124126,ENSG00000161638,ENSG00000152818,ENSG00000142871,ENSG00000205221,ENSG00000077942
GO:0002062	chondrocyte differentiation	0.0219121	0.0219121	1	ENSG00000134013,ENSG00000118523,ENSG00000068078,ENSG00000170891,ENSG00000019549,ENSG00000154764,ENSG00000163513,ENSG00000182158,ENSG00000149257,ENSG00000143369
GO:0032535	regulation of cellular component size	0.0232259	0.0232259	1	ENSG00000124126,ENSG00000167178,ENSG00000179242,ENSG00000240583,ENSG00000154764,ENSG00000184144,ENSG00000042493,ENSG00000254585,ENSG00000162490,ENSG00000197879,ENSG00000277586,ENSG00000143320,ENSG00000130429,ENSG00000151491,ENSG00000188064,ENSG00000114251,ENSG00000130203,ENSG00000120899,ENSG00000136059,ENSG00000134278,ENSG00000198910,ENSG00000183853,ENSG00000115414,ENSG00000135446
GO:0030500	regulation of bone mineralization	0.0259458	0.0259458	1	ENSG00000162733,ENSG00000142871,ENSG00000183160,ENSG00000122691,ENSG00000101144,ENSG00000177706,ENSG00000138829,ENSG00000143369,ENSG00000120899
GO:0014706	striated muscle tissue development	0.02629	0.02629	1	ENSG00000106991,ENSG00000113083,ENSG00000116741,ENSG00000140416,ENSG00000121577,ENSG00000102554,ENSG00000069702,ENSG00000136603,ENSG00000113721,ENSG00000150093,ENSG00000105974,ENSG00000064655,ENSG00000138795,ENSG00000122691,ENSG00000157168,ENSG00000163513,ENSG00000101144,ENSG00000114251,ENSG00000164442,ENSG00000160789,ENSG00000183072,ENSG00000164690
GO:0072593	reactive oxygen species metabolic process	0.0265326	0.0265326	1	ENSG00000118523,ENSG00000124126,ENSG00000113721,ENSG00000109610,ENSG00000142871,ENSG00000105974,ENSG00000137801,ENSG00000130707,ENSG00000109743,ENSG00000198743,ENSG00000163513,ENSG00000101144,ENSG00000141682,ENSG00000181790,ENSG00000107957,ENSG00000140092,ENSG00000007171,ENSG00000120899
GO:0031214	biomineral tissue development	0.0280883	0.0280883	1	ENSG00000113083,ENSG00000162733,ENSG00000164692,ENSG00000068078,ENSG00000108821,ENSG00000142871,ENSG00000183160,ENSG00000122691,ENSG00000101144,ENSG00000177706,ENSG00000138829,ENSG00000143369
GO:0003197	endocardial cushion development	0.0282698	0.0282698	1	ENSG00000106991,ENSG00000019549,ENSG00000122691,ENSG00000163513,ENSG00000101144,ENSG00000164442,ENSG00000198625
GO:0150115	cell-substrate junction organization	0.0298183	0.0298183	1	ENSG00000120156,ENSG00000144824,ENSG00000135862,ENSG00000161638,ENSG00000157227,ENSG00000168309,ENSG00000137801,ENSG00000035403,ENSG00000196878,ENSG00000120899,ENSG00000115414,ENSG00000072110
GO:0010463	mesenchymal cell proliferation	0.0306894	0.0306894	1	ENSG00000164107,ENSG00000163513,ENSG00000116132,ENSG00000101144,ENSG00000114251,ENSG00000160789,ENSG00000164690,ENSG00000126778
GO:0043010	camera-type eye development	0.0311019	0.0311019	1	ENSG00000171812,ENSG00000166147,ENSG00000240583,ENSG00000136603,ENSG00000113721,ENSG00000154764,ENSG00000122691,ENSG00000069188,ENSG00000163513,ENSG00000101144,ENSG00000197921,ENSG00000138829,ENSG00000188064,ENSG00000114251,ENSG00000164442,ENSG00000137936,ENSG00000164690,ENSG00000133216,ENSG00000176842,ENSG00000144810,ENSG00000184254,ENSG00000135446
GO:0110148	biomineralization	0.0317373	0.0317373	1	ENSG00000113083,ENSG00000162733,ENSG00000164692,ENSG00000068078,ENSG00000108821,ENSG00000142871,ENSG00000183160,ENSG00000122691,ENSG00000101144,ENSG00000177706,ENSG00000138829,ENSG00000143369
GO:0007507	heart development	0.0353403	0.0353403	1	ENSG00000106991,ENSG00000138080,ENSG00000113083,ENSG00000116741,ENSG00000120156,ENSG00000166147,ENSG00000140416,ENSG00000121577,ENSG00000069702,ENSG00000113721,ENSG00000130635,ENSG00000019549,ENSG00000142871,ENSG00000164107,ENSG00000150093,ENSG00000154734
GO:0003151	outflow tract morphogenesis	0.0394337	0.0394337	1	ENSG00000106991,ENSG00000069702,ENSG00000164107,ENSG00000122691,ENSG00000163513,ENSG00000101144,ENSG00000114251,ENSG00000164442,ENSG00000183072
GO:0048701	embryonic cranial skeleton morphogenesis	0.0405713	0.0405713	1	ENSG00000092607,ENSG00000157227,ENSG00000122691,ENSG00000163513,ENSG00000116132,ENSG00000176842,ENSG00000126778,ENSG00000105996
GO:0031346	positive regulation of cell projection organization	0.0422951	0.0422951	1	ENSG00000116741,ENSG00000167178,ENSG00000179242,ENSG00000173805,ENSG00000240583,ENSG00000136603,ENSG00000185483,ENSG00000157404,ENSG00000104435,ENSG00000182158,ENSG00000277586,ENSG00000143320,ENSG00000101144,ENSG00000163536,ENSG00000151491,ENSG00000114251,ENSG00000117385,ENSG00000130203,ENSG00000129244,ENSG00000120899
GO:0008015	blood circulation	0.0440327	0.0440327	1	ENSG00000106991,ENSG00000106538,ENSG00000116741,ENSG00000120156,ENSG00000118523,ENSG00000164692,ENSG00000113749,ENSG00000170075,ENSG00000140416,ENSG00000121577
GO:0045669	positive regulation of osteoblast differentiation	0.0440886	0.0440886	1	ENSG00000162733,ENSG00000142871,ENSG00000183160,ENSG00000164932,ENSG00000101144,ENSG00000177706,ENSG00000138829,ENSG00000188064
GO:0014910	regulation of smooth muscle cell migration	0.0467291	0.0467291	1	ENSG00000140416,ENSG00000113721,ENSG00000115461,ENSG00000122861,ENSG00000133110,ENSG00000154734,ENSG00000146674
GO:0071772	response to BMP	0.0479202	0.0479202	1	ENSG00000164619,ENSG00000106991,ENSG00000163430,ENSG00000166147,ENSG00000069702,ENSG00000136603,ENSG00000142871,ENSG00000105974,ENSG00000138795,ENSG00000101144,ENSG00000197921,ENSG00000114251,ENSG00000148204,ENSG00000101665,ENSG00000158747
GO:0071773	cellular response to BMP stimulus	0.0479202	0.0479202	1	ENSG00000164619,ENSG00000106991,ENSG00000163430,ENSG00000166147,ENSG00000069702,ENSG00000136603,ENSG00000142871,ENSG00000105974,ENSG00000138795,ENSG00000101144,ENSG00000197921,ENSG00000114251,ENSG00000148204,ENSG00000101665,ENSG00000158747

## Sheet: Figure 3H (2)
Pathways enriched from the gene list in Figure 3G
GO.ID	Description	p.Val	FDR	Phenotype	Genes
GO:0030198	extracellular matrix organization	1.26876e-10	1.26876e-10	1	COL6A2,TGFBI,DDR2,SERPINE1,COL1A2,EMILIN1,CAV1,LOXL1,LOX,COL1A1,CD44,BCAN,MFAP4,COL6A1,COL5A2,ADAMTS3,B4GALT1,SFRP2,COL8A1,ICAM1,CYP1B1,THBS1,EFEMP2,LUM,LAMB1,FN1,CLASP2,ECM2,NOTCH1,CYR61,POSTN,FAP,ITGAV,MMP16,PDGFA,MFAP5,CD47,COL6A3,ADAMTS1,COL12A1,MMP19,SH3PXD2B,ADAM12,DPT,ITGA11,COL3A1,NTNG1,ITGB4,FLRT2,COL24A1,SOX9,ITGB1,A2M,ITGA4
GO:0043062	extracellular structure organization	1.40856e-10	1.40856e-10	1	COL6A2,TGFBI,DDR2,SERPINE1,COL1A2,EMILIN1,CAV1,LOXL1,LOX,COL1A1,CD44,BCAN,MFAP4,COL6A1,COL5A2,ADAMTS3,B4GALT1,SFRP2,COL8A1,ICAM1,CYP1B1,THBS1,EFEMP2,LUM,LAMB1,FN1,CLASP2,ECM2,NOTCH1,CYR61,POSTN,FAP,ITGAV,MMP16,PDGFA,MFAP5,CD47,COL6A3,ADAMTS1,COL12A1,MMP19,SH3PXD2B,ADAM12,DPT,ITGA11,COL3A1,NTNG1,ITGB4,FLRT2,COL24A1,SOX9,ITGB1,A2M,ITGA4
GO:0031589	cell-substrate adhesion	3.6642e-08	3.6642e-08	1	EDIL3,GBP1,PPFIA2,ITGBL1,SERPINE1,BVES,NRP1,EMILIN1,AXL,COL1A1,CD44,VCL,EPHB3,CSF1,COL8A1,PTN,THBS1,CSPG5,TTYH1,RRAS,LAMB1,SDC4,FN1,CLASP2,ECM2,NOTCH1,FZD7,CYR61,POSTN,BST1,ACTN2,TYRO3,ITGAV,S100A10
GO:0030199	collagen fibril organization	4.45625e-07	4.45625e-07	1	DDR2,COL1A2,EMILIN1,LOXL1,LOX,COL1A1,COL5A2,ADAMTS3,SFRP2,CYP1B1
GO:0030155	regulation of cell adhesion	2.30206e-06	2.30206e-06	1	EDIL3,GBP1,TGFBI,CITED2,PAWR,SERPINE1,NRP1,IRF1,EMILIN1,CAV1,COL1A1,CD44,VCL,EPHB3,SFRP2,CSF1,MYO10,COL8A1,MAP2K5,ICAM1,IL15,CYP1B1,PTN,PDCD1LG2,TGFBR2,THBS1,CSPG5,RRAS,BMP7,SDC4,FN1,CLASP2,ECM2,GPR56,NOTCH1,FZD7,NUAK1,CYR61,WNT5A,ADAM22,POSTN,BST1,EPHA7,ITGAV,PLXNB3,S100A10,SEMA5A,PAG1
GO:0010810	regulation of cell-substrate adhesion	7.34832e-06	7.34832e-06	1	EDIL3,GBP1,SERPINE1,NRP1,EMILIN1,COL1A1,VCL,CSF1,COL8A1,PTN,THBS1,CSPG5,RRAS,SDC4,FN1,CLASP2,ECM2,NOTCH1,FZD7,CYR61,POSTN,BST1
GO:0048858	cell projection morphogenesis	2.44928e-05	2.44928e-05	1	ARC,PPFIA2,OLFM1,TAOK3,NRP1,GAB2,SDC2,MAP2,CD44,PALLD,SHC3,BRSK1,VCL,EPHB3,SLIT1,UNC13A,RNF157,PTN,TPBG,SYT1,CSPG5,CAMK2A,BMP7,CRMP1,FN1,CLASP2,GAS7,NOTCH1,WNT5A,POSTN,S100B,EPHA7,ARHGAP35,PLXNB3,SEMA5A,FLRT3,CACNG7,PLCG1,RNF165,PTPRZ1,PAK1,OMG,CPNE5,PTPRM,NEXN,CYFIP2,GJA1,DAB1,SKIL,KIF1A,NTNG1,EPHB2,COBL,FLRT2,COL25A1,TRAK1,SLIT3,ELAVL4,SHC1,ITGB1,FEZF1,ITGA4,CUL7,SEMA3C,NES
GO:0001944	vasculature development	3.77052e-05	3.77052e-05	1	ZFPM2,TGFBI,CITED2,SERPINE1,NRP1,COL1A2,EMILIN1,CAV1,LOXL1,LOX,COL1A1,SOCS3,EPHB3,ATP2B4,B4GALT1,CITED1,SFRP2,COL8A1,MAP2K5,CYP1B1,TLR3,PTN,PDGFD,TGFBR2,THBS1,RRAS,TWIST1,BMP7,FN1,SP100,LRP5,GPR56,NOTCH1,CALCRL,CYR61,WNT5A,VASH1,PTPRB,FAP,STAT1,ITGAV,SHB,SEMA5A,PDGFA,CASP8,TNFAIP3,PLCG1,SERPINF1,PTPRM,PTPN14,ADAMTS1,MMP19,ADAM12,ARHGAP24,CHD7,ERRFI1,ANPEP,MYH9,PARVA,ERAP1,SRPX2,PRICKLE1,COL3A1,EP…
GO:0001568	blood vessel development	3.86061e-05	3.86061e-05	1	ZFPM2,TGFBI,CITED2,SERPINE1,NRP1,COL1A2,EMILIN1,CAV1,LOXL1,LOX,COL1A1,SOCS3,EPHB3,ATP2B4,B4GALT1,CITED1,SFRP2,COL8A1,MAP2K5,CYP1B1,TLR3,PTN,PDGFD,TGFBR2,THBS1,RRAS,TWIST1,BMP7,FN1,SP100,LRP5,GPR56,NOTCH1,CALCRL,CYR61,WNT5A,VASH1,PTPRB,FAP,STAT1,ITGAV,SHB,SEMA5A,PDGFA,CASP8,TNFAIP3,PLCG1,SERPINF1,PTPRM,ADAMTS1,MMP19,ADAM12,ARHGAP24,CHD7,ANPEP,MYH9,PARVA,ERAP1,SRPX2,PRICKLE1,COL3A1,EPHB2,HEG1
GO:0090287	regulation of cellular response to growth factor stimulus	4.4956e-05	4.4956e-05	1	FSTL1,RUNX2,DAB2,CHST11,CITED2,CADM4,EMILIN1,FGFBP3,CAV1,LOX,MYOF,ATP2B4,ADAMTS3,CITED1,SFRP2
GO:0000904	cell morphogenesis involved in differentiation	6.27705e-05	6.27705e-05	1	GBP1,ARC,PPFIA2,OLFM1,BVES,NRP1,GAB2,SDC2,AXL,MAP2,PALLD,SHC3,BRSK1,VCL,EPHB3,SLIT1,SIPA1L3,PTN,TPBG,CSPG5,CAMK2A,LAMB1,MET,BMP7,CRMP1,FN1,CLASP2,NOTCH1,FZD7,WNT5A,POSTN,CDHR1,S100B,EPHA7,TYRO3,ITGAV,ARHGAP35,PLXNB3,S100A10,SEMA5A,FLRT3,PLCG1,RNF165,PTPRZ1,PAK1,OMG,PTPRM,NEXN,DAB1,MYH9,SKIL,PARVA,KIF1A,NTNG1,EPHB2,COBL,HEG1,FLRT2,COL25A1,TRAK1,SLIT3,ELAVL4,SHC1,ITGB1,FEZF1,ITGA4,CUL7
GO:0032990	cell part morphogenesis	6.87662e-05	6.87662e-05	1	ARC,PPFIA2,OLFM1,TAOK3,NRP1,GAB2,SDC2,MAP2,CD44,PALLD,SHC3,BRSK1,VCL,EPHB3,SLIT1,UNC13A,RNF157,PTN,TPBG,SYT1,CSPG5,CAMK2A,BMP7,CRMP1,FN1,CLASP2,GAS7,NOTCH1,WNT5A,POSTN,S100B,EPHA7,ARHGAP35,PLXNB3,SEMA5A,FLRT3,CACNG7,PLCG1,RNF165,PTPRZ1,PAK1,OMG,CPNE5,PTPRM,NEXN,CYFIP2,GJA1,DAB1,SKIL,KIF1A,NTNG1,EPHB2,COBL,FLRT2,COL25A1,TRAK1,SLIT3,ELAVL4,SHC1,ITGB1,FEZF1,ITGA4,CUL7,SEMA3C,NES
GO:0120039	plasma membrane bounded cell projection morphogenesis	8.5992e-05	8.5992e-05	1	ARC,PPFIA2,OLFM1,TAOK3,NRP1,GAB2,SDC2,MAP2,CD44,PALLD,SHC3,BRSK1,VCL,EPHB3,SLIT1,UNC13A,RNF157,PTN,TPBG,SYT1,CAMK2A,BMP7,CRMP1,FN1,CLASP2,GAS7,NOTCH1,WNT5A,POSTN,S100B,EPHA7,ARHGAP35,PLXNB3,SEMA5A,FLRT3,CACNG7,PLCG1,RNF165,PTPRZ1,PAK1,OMG,CPNE5,PTPRM,NEXN,CYFIP2,GJA1,DAB1,SKIL,KIF1A,NTNG1,EPHB2,COBL,FLRT2,COL25A1,TRAK1,SLIT3,ELAVL4,SHC1,ITGB1,FEZF1,ITGA4,CUL7
GO:0035239	tube morphogenesis	8.77655e-05	8.77655e-05	1	ZFPM2,TGFBI,CITED2,SERPINE1,NRP1,EMILIN1,CAV1,LOX,EPHB3,ATP2B4,B4GALT1,CITED1,SFRP2,CSF1,SOX8,COL8A1,MAP2K5,FAT4,CYP1B1,TLR3,PTN,TGFBR2,THBS1,RRAS,MET,TWIST1,BMP7,SDC4,FN1,SP100,LRP5,GPR56,NOTCH1,CALCRL,CYR61,WNT5A,VASH1,PTPRB,FAP,EPHA7,STAT1,ITGAV,ARHGAP35,SHB,SEMA5A,PDGFA,LMO4,MICAL2,CASP8,TNFAIP3,PLCG1,PAK1,SERPINF1,PTPRM,ADAMTS1,MMP19,ADAM12,ARHGAP24,CHD7,ANPEP,MYH9,MTSS1,PARVA,ERAP1,SRPX2,PR…
GO:0048812	neuron projection morphogenesis	9.59802e-05	9.59802e-05	1	ARC,PPFIA2,OLFM1,TAOK3,NRP1,GAB2,SDC2,MAP2,PALLD,SHC3,BRSK1,VCL,EPHB3,SLIT1,UNC13A,RNF157,PTN,TPBG,SYT1,CAMK2A,BMP7,CRMP1,FN1,CLASP2,GAS7,NOTCH1,WNT5A,POSTN,S100B,EPHA7,ARHGAP35,PLXNB3,SEMA5A,FLRT3,CACNG7,PLCG1,RNF165,PTPRZ1,PAK1,OMG,CPNE5,PTPRM,NEXN,CYFIP2,GJA1,DAB1,SKIL,KIF1A,NTNG1,EPHB2,COBL,FLRT2,COL25A1,TRAK1,SLIT3,ELAVL4,SHC1,ITGB1,FEZF1,ITGA4,CUL7
GO:0034341	response to interferon-gamma	9.67656e-05	9.67656e-05	1	GBP1,GBP2,GBP3,IRF1,CASP1,CD44,TRIM21,PARP14,SOCS3,CITED1,ICAM1,TLR3,GBP5,CAMK2A,SP100,NMI,TRIM34,WNT5A,STAT1,CD47,IFNGR2,IFITM3,ASS1,IFITM1,IFI30,IFITM2
GO:0060333	interferon-gamma-mediated signaling pathway	0.000216882	0.000216882	1	GBP1,GBP2,IRF1,CD44,TRIM21,PARP14,SOCS3,ICAM1,CAMK2A,SP100,NMI,TRIM34,STAT1
GO:0097435	supramolecular fiber organization	0.000280387	0.000280387	1	PAWR,DDR2,SSH3,SNX9,AIF1L,NRP1,COL1A2,EMILIN1,MAP2,LOXL1,LOX,COL1A1,MFAP4,ARPC1B,COL5A2,ADAMTS3,SFRP2,ICAM1,RHOBTB1,CYP1B1,PSTPIP2,CDC42EP3,HIP1R,EFEMP2,LUM,MET,APC,SDC4,CLASP2,GAS7,PLS3,TMOD2,EPS8,SVIL,ACTN2,SPIRE1,ARHGAP35,ARHGAP18,DPYSL3,S100A10,SEMA5A,MFAP5,MYO1B,MICAL2,CD47,PAK1,SYNPO,COL12A1,NCKAP5,SH3PXD2B,CYFIP2
GO:0048514	blood vessel morphogenesis	0.000290877	0.000290877	1	ZFPM2,TGFBI,CITED2,SERPINE1,NRP1,EMILIN1,CAV1,LOX,EPHB3,ATP2B4,B4GALT1,CITED1,SFRP2,COL8A1,MAP2K5,CYP1B1,TLR3,PTN,TGFBR2,THBS1,RRAS,TWIST1,FN1,SP100,LRP5,GPR56,NOTCH1,CALCRL,CYR61,WNT5A,VASH1,PTPRB,FAP,STAT1,ITGAV,SHB,SEMA5A,PDGFA,CASP8,TNFAIP3,PLCG1,SERPINF1,PTPRM,ADAMTS1,MMP19,ADAM12,ARHGAP24,CHD7,ANPEP,MYH9,PARVA,ERAP1,SRPX2,COL3A1,EPHB2,HEG1
GO:0030278	regulation of ossification	0.000382791	0.000382791	1	RUNX2,DDR2,ENPP1,CSF1,P2RX7,PTN,SGMS2,TWIST1,BMP7,OMD,NOTCH1,INTU,CYR61,WNT5A
GO:0071346	cellular response to interferon-gamma	0.000408569	0.000408569	1	GBP1,GBP2,GBP3,IRF1,CASP1,CD44,TRIM21,PARP14,SOCS3,ICAM1,TLR3,GBP5,CAMK2A,SP100,NMI,TRIM34,WNT5A,STAT1
GO:0007169	transmembrane receptor protein tyrosine kinase signaling pathway	0.000703531	0.000703531	1	RUNX2,DDR2,CADM4,NRP1,GAB2,EMILIN1,FGFBP3,SDC2,AXL,LOX,COL1A1,SOGA1,MYOF,SHC3,SOCS3,ARPC1B,ENPP1,EPHB3,ADAMTS3,CSF1,MVP,FAT4,SH3TC2,PDGFD,HIP1R,THBS1,ALK,RHOQ,MET,APC,EFEMP1,SHC2,CLASP2,ARID5B,SIRT2,HAP1,WNT5A,SIK2,EPHA7,TYRO3,ITGAV,SHB,PDGFA
GO:0060560	developmental growth involved in morphogenesis	0.000991122	0.000991122	1	OLFM1,NRP1,MAP2,VCL,SFRP2,CSF1,SLIT1,UNC13A,RNF157,TGFBR2,SYT1,FN1,CLASP2,NOTCH1,WNT5A,POSTN,EPHA7,SEMA5A,FLRT3,CACNG7,PAK1,CPNE5,CYFIP2,COBL,SLIT3,SOX9,YAP1,ITGB1,ITGA4,SEMA3C
GO:0032989	cellular component morphogenesis	0.00148179	0.00148179	1	ARC,PPFIA2,OLFM1,TAOK3,NRP1,GAB2,SDC2,MAP2,CD44,PALLD,SHC3,BRSK1,VCL,EPHB3,SLIT1,UNC13A,RNF157,PTN,TPBG,SYT1,CSPG5,CAMK2A,BMP7,CRMP1,FN1,CLASP2,GAS7,TMOD2,NOTCH1,WNT5A,POSTN,S100B,ACTN2,EPHA7,ARHGAP35,PLXNB3,SEMA5A,FLRT3,CACNG7,PLCG1,RNF165,PTPRZ1,PAK1,OMG,CPNE5,PTPRM,NEXN,CYFIP2,GJA1,DAB1,SKIL,KIF1A,NTNG1,EPHB2,COBL,FLRT2,COL25A1,TRAK1,SLIT3,ELAVL4,SHC1,ITGB1,FEZF1,ITGA4,CUL7,SEMA3C,NES
GO:0071496	cellular response to external stimulus	0.00153248	0.00153248	1	CNN2,IRF1,CASP1,LPL,AXL,CAV1,COL1A1,BRSK1,SFRP2,TRIM24,MAP3K1,ICAM1,IL15,P2RX7,TLR3,PTN
GO:0071363	cellular response to growth factor stimulus	0.00158237	0.00158237	1	FSTL1,RUNX2,DAB2,CHST11,CITED2,CADM4,NRP1,COL1A2,EMILIN1,FGFBP3,CAV1,LOX,COL1A1,CD44,MYOF,ATP2B4,ADAMTS3,CITED1,SFRP2,CD109,MAP2K5,FAT4
GO:0007507	heart development	0.00205774	0.00205774	1	ZFPM2,OLFM1,CITED2,SMG9,BVES,NRP1,EMILIN1,LOX,SFRP2,BICC1,MAP2K5,FAT4,JPH2,PTN,TGFBR2,ALPK2,SOX6,TWIST1,BMP7,FN1,NOTCH1,FZD7,CALCRL,CYR61,WNT5A,ACTN2,ECE1,LMO4,MICAL2,FLRT3,CASP8,SRI,PAK1,SNAI2,ADAMTS1,SH3PXD2B,CHD7,GJA1,PARVA,PRICKLE1,COL3A1,HEG1,FLRT2,ERBB4,SLIT3,SOX9,YAP1,SHC1,ITGB1,IFT57,IGF1,GATA6,SEMA3C
GO:0032970	regulation of actin filament-based process	0.002277	0.002277	1	SSH3,SNX9,CNN2,NRP1,CAV1,ARPC1B,PDE4B,ICAM1,RHOBTB1,CDC42EP3,HIP1R,RHOQ,MET,SDC4,CLASP2,TMOD2,BST1,EPS8,SVIL,ACTN2,SPIRE1,ARHGAP35,ARHGAP18,S100A10,SEMA5A,PDGFA,CD47,SRI,PAK1,PDE4D,SYNPO,SH3PXD2B,CYFIP2
GO:0044087	regulation of cellular component biogenesis	0.00243015	0.00243015	1	SSH3,SNX9,NRP1,EMILIN1,MAP2,CAV1,LRRC4B,ARPC1B,VCL,TET1,EPHB3,MYO10,ICAM1,SLIT1,ATF7IP,P2RX7,CDC42EP3,HIP1R,THBS1,GPC4,GBP5,ATP8B1,TPBG,ZMYND8,RHOQ,MET,APC,BMP7,TLR6,SDC4,CLASP2,SIRT2,TMOD2,NOTCH1,ARHGEF9,LHFPL4,HAP1,CYR61,WNT5A,EPS8,SVIL,SPIRE1,TRIM9,EPHA7,ARHGAP35,ARHGAP18,DPYSL3,PLXNB3,S100A10,LMO4,SETD5,FLRT3,CD47,PAK1,SNAI2,SYNPO,SEPT7,SH3PXD2B,CYFIP2,PIP4K2A,ARHGAP24
GO:0061448	connective tissue development	0.00243314	0.00243314	1	RUNX2,TGFBI,CHST11,LOX,COL1A1,CD44,SFRP2,CSF1,SOX8,PDGFD,TGFBR2,SOX6,LUM,EFEMP1,BMP7,ARID5B,LRP5,NOTCH1,CYR61,WNT5A
GO:0001525	angiogenesis	0.00279122	0.00279122	1	TGFBI,SERPINE1,NRP1,EMILIN1,CAV1,EPHB3,ATP2B4,B4GALT1,SFRP2,COL8A1,MAP2K5,CYP1B1,TLR3,PTN,TGFBR2,THBS1,RRAS,TWIST1,FN1,SP100,GPR56,NOTCH1,CALCRL,CYR61,WNT5A,VASH1,PTPRB,FAP,STAT1,ITGAV,SHB,SEMA5A,PDGFA,CASP8,TNFAIP3,PLCG1,SERPINF1,PTPRM,ADAMTS1,MMP19,ADAM12,ARHGAP24,ANPEP,MYH9,PARVA,ERAP1,SRPX2
GO:0070848	response to growth factor	0.00292593	0.00292593	1	FSTL1,RUNX2,DAB2,CHST11,CITED2,CADM4,NRP1,COL1A2,EMILIN1,FGFBP3,CAV1,LOX,COL1A1,CD44,MYOF,ATP2B4,ADAMTS3,CITED1,SFRP2,CD109,MAP2K5,FAT4
GO:0048729	tissue morphogenesis	0.0039281	0.0039281	1	ZFPM2,DAB2,PSMB9,CITED2,NRP1,CD44,SOCS3,BRSK1,VCL,PSMB8,CITED1,SFRP2,CSF1,SOX8,FAT4,TGFBR2,GPC4,EYA2,MET,TWIST1,BMP7,SDC4,CLASP2,LRP5,GCNT1,NOTCH1,FZD7,INTU,CYR61,WNT5A,EPHA7,STAT1,ARHGAP35,PDGFA,LMO4,MICAL2,FLRT3,PAK1,SNAI2,TWSG1,ARHGAP24,MLLT3,CHD7,GJA1,MTSS1,PRICKLE1,COL3A1,COBL,HEG1,ITGB4,HGF,SOX9,YAP1,ITGB1,SOSTDC1,IFT57,HOXB2,SEMA3C
GO:0022604	regulation of cell morphogenesis	0.00434334	0.00434334	1	GBP1,ARC,BVES,NRP1,CD44,MYO10,ICAM1,RHOBTB1,UNC13A,RNF157,PTN,CDC42EP3,SYT1,CSPG5,RHOQ,FN1,WNT5A,POSTN,EPS8,ARHGAP35,ARHGAP18,PLXNB3,S100A10
GO:0034446	substrate adhesion-dependent cell spreading	0.00464803	0.00464803	1	GBP1,BVES,NRP1,AXL,EPHB3,CSPG5,LAMB1,FN1,FZD7,POSTN,TYRO3,ITGAV,S100A10
GO:0085029	extracellular matrix assembly	0.00466919	0.00466919	1	COL1A2,EMILIN1,LOX,MFAP4,EFEMP2,LAMB1,CLASP2,NOTCH1
GO:0035456	response to interferon-beta	0.00563024	0.00563024	1	IRF1,TLR3,IFI16,TRIM6,STAT1,IFITM3,IFITM1,IFITM2,CDC34
GO:0006024	glycosaminoglycan biosynthetic process	0.00625224	0.00625224	1	CHST11,ST3GAL6,SDC2,BCAN,B4GALT1,GPC4,DSE,CSPG5,LUM,OMD,SDC4
GO:0048667	cell morphogenesis involved in neuron differentiation	0.00642781	0.00642781	1	ARC,PPFIA2,OLFM1,NRP1,GAB2,SDC2,MAP2,PALLD,SHC3,BRSK1,VCL,EPHB3,SLIT1,PTN,TPBG,CAMK2A,BMP7,CRMP1,FN1,CLASP2,NOTCH1,WNT5A,CDHR1,S100B,EPHA7,ARHGAP35,PLXNB3,SEMA5A,FLRT3,PLCG1,RNF165,PTPRZ1,PAK1,OMG,PTPRM,NEXN,DAB1,SKIL,KIF1A,NTNG1,EPHB2,COBL,FLRT2,COL25A1,TRAK1,SLIT3,ELAVL4,SHC1,ITGB1,FEZF1,ITGA4,CUL7
GO:0001503	ossification	0.00835097	0.00835097	1	RUNX2,TWIST2,DDR2,COL1A2,LOX,COL1A1,COL6A1,COL5A2,ENPP1,CITED1,SFRP2,CSF1,SOX8,FAT4,P2RX7,PTN,SGMS2,TWIST1,BMP7,OMD,LRP5,NOTCH1,INTU,CYR61,WNT5A,MMP16,SNAI2,MRC2,SH3PXD2B,TWSG1,ITGA11,OSTF1,IFITM1,SLC24A3,HGF,SOX9,ASPN,YAP1,RRAS2,IGF1
GO:0030203	glycosaminoglycan metabolic process	0.0093673	0.0093673	1	CHST11,ST3GAL6,SDC2,CD44,BCAN,B4GALT1,IL15,GPC4,DSE,CSPG5,LUM,OMD,SDC4
GO:0009611	response to wounding	0.00958132	0.00958132	1	ZFPM2,CADM4,SERPINE1,CNN2,NRP1,IRF1,COL1A2,AXL,CAV1,LOX,PPL,COL1A1,CD44,MYOF,VCL,B4GALT1,CD109,P2RX7,PTN,TGFBR2,THBS1,SDC4,FN1,CLASP2,SLC7A11,DCBLD2,FZD7,CYR61,WNT5A,VASH1,POSTN,PLLP,FAP,TYRO3,ARHGAP35,DPYSL3,PDGFA,MYL9,FLRT3
GO:0007160	cell-matrix adhesion	0.00966781	0.00966781	1	PPFIA2,ITGBL1,SERPINE1,NRP1,EMILIN1,CD44,VCL,CSF1,THBS1,RRAS,SDC4,FN1,CLASP2,ECM2,POSTN,BST1,ACTN2,ITGAV,S100A10
GO:0042060	wound healing	0.0112734	0.0112734	1	ZFPM2,CADM4,SERPINE1,CNN2,IRF1,COL1A2,AXL,CAV1,LOX,PPL,COL1A1,CD44,MYOF,VCL,B4GALT1,CD109,P2RX7,TGFBR2,THBS1,SDC4,FN1,CLASP2,SLC7A11,DCBLD2,FZD7,CYR61,WNT5A,POSTN,FAP,TYRO3,ARHGAP35
GO:0006023	aminoglycan biosynthetic process	0.011588	0.011588	1	CHST11,ST3GAL6,SDC2,BCAN,B4GALT1,GPC4,DSE,CSPG5,LUM,OMD,SDC4
GO:0018108	peptidyl-tyrosine phosphorylation	0.0117772	0.0117772	1	DDR2,CADM4,NRP1,AXL,CAV1,CD44,PARP14,SOCS3,EPHB3,SFRP2,MVP,MAP2K5,ICAM1,IL15,CTF1,PDGFD,KITLG
GO:0018212	peptidyl-tyrosine modification	0.013055	0.013055	1	DDR2,CADM4,NRP1,AXL,CAV1,CD44,PARP14,SOCS3,EPHB3,SFRP2,MVP,MAP2K5,ICAM1,IL15,CTF1,PDGFD,KITLG
GO:0007015	actin filament organization	0.0139029	0.0139029	1	PAWR,SSH3,SNX9,AIF1L,NRP1,ARPC1B,ICAM1,RHOBTB1,PSTPIP2,CDC42EP3,HIP1R,MET,SDC4,CLASP2,GAS7,PLS3,TMOD2,EPS8,SVIL,ACTN2,SPIRE1,ARHGAP35,ARHGAP18,DPYSL3,S100A10,SEMA5A,MYO1B,MICAL2,CD47,PAK1,SYNPO,SH3PXD2B,CYFIP2
GO:0045662	negative regulation of myoblast differentiation	0.015569	0.015569	1	SOX8,CMTM5,NOTCH1,CXCL14,PRICKLE1,SOX9,SOSTDC1,MBNL3
GO:0017015	regulation of transforming growth factor beta receptor signaling pathway	0.0169023	0.0169023	1	DAB2,CHST11,CITED2,EMILIN1,CAV1,LOX,CITED1,CD109,TGFBR2,THBS1
GO:0042327	positive regulation of phosphorylation	0.0190976	0.0190976	1	DAB2,DDR2,SNX9,TAOK3,NRP1,AXL,CAV1,CD44,PARP14,SOCS3,TRAF4,EPHB3,ATP2B4,SFRP2,CSF1,MAP3K1,MAP2K5,EEF1A2,ICAM1,MDFIC,IL15,P2RX7,CTF1,TLR3,PDGFD,KITLG,TGFBR2,THBS1,KSR1,ALK,MET,SHC2,BMP7,TLR6,SDC4,STK39
GO:0050732	negative regulation of peptidyl-tyrosine phosphorylation	0.0195452	0.0195452	1	CADM4,CAV1,PARP14,SOCS3,SFRP2,MVP
GO:0002009	morphogenesis of an epithelium	0.0199681	0.0199681	1	DAB2,PSMB9,CITED2,NRP1,CD44,SOCS3,BRSK1,VCL,PSMB8,CITED1,SFRP2,CSF1,SOX8,FAT4,TGFBR2,GPC4,MET,TWIST1,BMP7,SDC4,CLASP2,LRP5,NOTCH1,FZD7,INTU,CYR61,WNT5A,EPHA7,STAT1,ARHGAP35,PDGFA,LMO4,MICAL2,FLRT3,PAK1,SNAI2,ARHGAP24,MLLT3,GJA1,MTSS1,PRICKLE1,COBL,HGF,SOX9,YAP1,SOSTDC1,IFT57,HOXB2,SEMA3C
GO:0006027	glycosaminoglycan catabolic process	0.0199885	0.0199885	1	SDC2,CD44,BCAN,GPC4,CSPG5,LUM,OMD,SDC4
GO:1903844	regulation of cellular response to transforming growth factor beta stimulus	0.0206695	0.0206695	1	DAB2,CHST11,CITED2,EMILIN1,CAV1,LOX,CITED1,CD109,TGFBR2,THBS1
GO:0010811	positive regulation of cell-substrate adhesion	0.021571	0.021571	1	EDIL3,NRP1,EMILIN1,CSF1,COL8A1,PTN,CSPG5,RRAS,SDC4,FN1,ECM2,CYR61,S100A10
GO:0001704	formation of primary germ layer	0.0220283	0.0220283	1	COL6A1,COL5A2,SFRP2,COL8A1,EYA2,LAMB1,BMP7,FN1,FZD7,WNT5A,ITGAV,COL12A1,TWSG1,GJA1,ITGB4,ITGB1,ITGA4,GATA6
GO:0048588	developmental cell growth	0.0235395	0.0235395	1	OLFM1,NRP1,MAP2,VCL,SLIT1,UNC13A,RNF157,TGFBR2,SYT1,FN1,CLASP2,WNT5A,POSTN,EPHA7,SEMA5A,FLRT3,CACNG7,PAK1,CPNE5,CYFIP2,COBL,SLIT3,SOX9,ITGB1,ITGA4,IGF1,SEMA3C
GO:0006022	aminoglycan metabolic process	0.02359	0.02359	1	CHST11,ST3GAL6,SDC2,CD44,BCAN,B4GALT1,IL15,GPC4,DSE,CSPG5,LUM,OMD,SDC4
GO:1990138	neuron projection extension	0.0243652	0.0243652	1	OLFM1,NRP1,MAP2,VCL,SLIT1,UNC13A,RNF157,SYT1,FN1,CLASP2,WNT5A,POSTN,SEMA5A,FLRT3,CACNG7,PAK1,CPNE5,CYFIP2,SLIT3,ITGB1,ITGA4,SEMA3C
GO:0048598	embryonic morphogenesis	0.0267695	0.0267695	1	RUNX2,CHST11,CITED2,COL6A1,SOCS3,COL5A2,SFRP2,SOX8,COL8A1,MAP2K5,TGFBR2,EYA2,LAMB1,TWIST1,EFEMP1,BMP7,SDC4,FN1,CLASP2,LRP5,NOTCH1,FZD7,INTU,CYR61,WNT5A,LRIG3,ITGAV,ARHGAP35,MMP16,ECE1,MFAP5,LMO4,MICAL2,LRIG1,FLRT3,COL12A1,TWSG1,CHD7,GJA1,PRICKLE1,EPHB2,COBL,ITGB4,SOX9,YAP1,ITGB1,HOXB5,IFT57,ITGA4,GATA6,HOXB2
GO:0061564	axon development	0.0273777	0.0273777	1	OLFM1,PLP1,NRP1,GAB2,MAP2,PALLD,SHC3,BRSK1,VCL,EPHB3,TSPAN2,SLIT1,PTN,BMP7,CRMP1,FN1,CLASP2,NOTCH1,WNT5A,S100B,EPHA7,ARHGAP35,PLXNB3,SEMA5A,FLRT3,PLCG1,RNF165,PTPRZ1,PAK1,OMG,PTPRM,NEXN,DAB1,SKIL,NTNG1,EPHB2,COBL,FLRT2,COL25A1,TRAK1,SLIT3,SHC1,ITGB1,FEZF1,ITGA4,SEMA3C
GO:1901888	regulation of cell junction assembly	0.0274375	0.0274375	1	NRP1,CAV1,LRRC4B,VCL,EPHB3,SLIT1,THBS1,GPC4,TPBG,SDC4,CLASP2,LHFPL4,WNT5A,EPHA7,S100A10,SETD5,FLRT3,SNAI2,GJA1,SRPX2,EPHB2,FLRT2
GO:0010463	mesenchymal cell proliferation	0.0306841	0.0306841	1	FAT4,PTN,TGFBR2,BMP7,LRP5,WNT5A,STAT1,PDGFA
GO:0120035	regulation of plasma membrane bounded cell projection organization	0.0312344	0.0312344	1	ARC,PPFIA2,NRP1,SDC2,MAP2,CAV1,CD44,BRSK1,EPHB3,SFRP2,ITM2C,MYO10,ICAM1,P2RX7,PTN,CDC42EP3,ATP8B1,ALK,ZMYND8,RHOQ,APC,BMP7,MARK1,CRMP1,FN1,HAP1,HOMER1,WNT5A,EPS8,EPHA7,ARHGAP35,DPYSL3,PLXNB3,SEMA5A,PAK1,OMG,SERPINF1,SEPT7,ARHGAP24,DAB1,SKIL,KIF1A,NTNG1,EPHB2,COBL,TRAK1,HGF,ODF2L,ELAVL4,YAP1,CUL7,NAV3,SEMA3C
GO:0019221	cytokine-mediated signaling pathway	0.0313593	0.0313593	1	GBP1,CASP4,GBP2,PSMB9,CARD16,CNN2,IRF1,CASP1,GAB2,COL1A2,AXL,CAV1,CD44,TRIM21,PARP14,SOCS3,TRAF4,PSMB8,CSF1
GO:0031344	regulation of cell projection organization	0.0315813	0.0315813	1	ARC,PPFIA2,NRP1,SDC2,MAP2,CAV1,CD44,BRSK1,EPHB3,SFRP2,ITM2C,MYO10,ICAM1,P2RX7,PTN,CDC42EP3,ATP8B1,ALK,ZMYND8,RHOQ,APC,BMP7,MARK1,CRMP1,FN1,HAP1,HOMER1,WNT5A,EPS8,EPHA7,ARHGAP35,DPYSL3,PLXNB3,SEMA5A,PAK1,OMG,SERPINF1,SEPT7,ARHGAP24,DAB1,RAB8B,SKIL,KIF1A,NTNG1,EPHB2,COBL,TRAK1,HGF,ODF2L,ELAVL4,YAP1,CUL7,NAV3,SEMA3C
GO:0007409	axonogenesis	0.0320017	0.0320017	1	OLFM1,NRP1,GAB2,MAP2,PALLD,SHC3,BRSK1,VCL,EPHB3,SLIT1,BMP7,CRMP1,FN1,CLASP2,NOTCH1,WNT5A,S100B,EPHA7,ARHGAP35,PLXNB3,SEMA5A,FLRT3,PLCG1,RNF165,PTPRZ1,PAK1,OMG,PTPRM,NEXN,DAB1,SKIL,NTNG1,EPHB2,COBL,FLRT2,COL25A1,TRAK1,SLIT3,SHC1,ITGB1,FEZF1,ITGA4,SEMA3C
GO:0022612	gland morphogenesis	0.0340511	0.0340511	1	NRP1,CAV1,CSF1,PTN,TGFBR2,BMP7,LRP5,NOTCH1,WNT5A,PDGFA,PLAG1,TNFAIP3,SNAI2,TWSG1,HGF,SOX9,SOSTDC1,SEMA3C
GO:0110053	regulation of actin filament organization	0.0345902	0.0345902	1	SSH3,SNX9,NRP1,ARPC1B,ICAM1,CDC42EP3,HIP1R,MET,SDC4,CLASP2,TMOD2,EPS8,SVIL,ACTN2,SPIRE1,ARHGAP35,ARHGAP18,S100A10,SEMA5A,CD47,PAK1,SYNPO,SH3PXD2B,CYFIP2
GO:0048762	mesenchymal cell differentiation	0.0386156	0.0386156	1	DAB2,OLFM1,CITED2,NRP1,COL1A1,SFRP2,SOX8,KITLG,TGFBR2,TWIST1,BMP7,FN1,VASN,CLASP2,NOTCH1,WNT5A,STAT1,SEMA5A
GO:0051272	positive regulation of cellular component movement	0.0399898	0.0399898	1	DAB2,TWIST2,PLP1,DDR2,SERPINE1,NRP1,MAP2,CAV1,COL1A1,CSF1,ICAM1,PTN,PDGFD,KITLG,TGFBR2,THBS1,RRAS,LAMB1,MET,TWIST1,APC,BMP7,STK39,FN1,CLASP2,NOTCH1,CYR61,WNT5A,CXCL14,POSTN,ITGAV,SEMA5A,PDGFA
GO:0071559	response to transforming growth factor beta	0.0403571	0.0403571	1	DAB2,CHST11,CITED2,COL1A2,EMILIN1,CAV1,LOX,COL1A1,CITED1,CD109,PDGFD,TGFBR2,THBS1,MXRA5,SOX6,VASN,WNT5A,POSTN
GO:0006026	aminoglycan catabolic process	0.0410258	0.0410258	1	SDC2,CD44,BCAN,GPC4,CSPG5,LUM,OMD,SDC4
GO:0007517	muscle organ development	0.0410346	0.0410346	1	ZFPM2,FOXN2,CITED2,BVES,CAV1,LOX,SOX8,CTF1,JPH2,CNTFR,SOX6,TWIST1,ARID5B,SIRT2,NOTCH1,HOMER1,WNT5A,TCF12,SVIL,COL6A3,SRI,CHD7,TAGLN,SKIL,USP2,ITGA11,COL3A1,ASS1,HEG1,DNER
GO:0040017	positive regulation of locomotion	0.0427089	0.0427089	1	DAB2,TWIST2,PLP1,DDR2,SERPINE1,BVES,NRP1,CAV1,COL1A1,CSF1,ICAM1,PTN,PDGFD,KITLG,TGFBR2,THBS1,RRAS,LAMB1,MET,TWIST1,APC,BMP7,STK39,FN1,CLASP2,NOTCH1,CYR61,WNT5A,CXCL14,POSTN,ITGAV,SEMA5A,PDGFA
GO:0032956	regulation of actin cytoskeleton organization	0.0458711	0.0458711	1	SSH3,SNX9,NRP1,ARPC1B,ICAM1,RHOBTB1,CDC42EP3,HIP1R,RHOQ,MET,SDC4,CLASP2,TMOD2,BST1,EPS8,SVIL,ACTN2,SPIRE1,ARHGAP35,ARHGAP18,S100A10,SEMA5A,PDGFA,CD47,PAK1,SYNPO,SH3PXD2B,CYFIP2
GO:0071356	cellular response to tumor necrosis factor	0.0470171	0.0470171	1	GBP1,CASP4,GBP2,GBP3,PSMB9,CARD16
GO:0045785	positive regulation of cell adhesion	0.047233	0.047233	1	EDIL3,CITED2,NRP1,EMILIN1,CAV1,CD44,SFRP2,CSF1,MYO10,COL8A1,ICAM1,IL15,PTN,PDCD1LG2,TGFBR2,CSPG5,RRAS,BMP7,SDC4,FN1,ECM2,GPR56,CYR61,WNT5A
GO:0001816	cytokine production	0.049188	0.049188	1	GBP1,BTN3A3,CARD16,LACC1,PAWR,SERPINE1,IRF1,CASP1,LPL,BTN3A1,AXL,TRIM21,PDE4B,ADAMTS3,BTN3A2,MAP2K5,IL15,CYP1B1,P2RX7,TLR3,PDCD1LG2,NDRG2,THBS1,GBP5,LUM,TWIST1,TLR6,FN1,UBA7,NMI,GPR56,NOTCH1,MR1,IFI16,TRIM6,CARD8,WNT5A,POSTN,STAT1,ITGAV
