# Supplementary material for: Global hypo-methylation in a proportion of glioblastoma enriched for an astrocytic signature is associated with increased invasion and altered immune landscape
Source: eLife journal article supplement (doi:10.7554/elife.77335), 2022-11-02
Supplement: fig3-figsupp1-data1 [file Figure_3_figure_supplement_1_A-E_H-K.xlsx]

## Sheet: Figure 3-figure supplement 1
	Figure 3-figure supplement 1 A	ssGSEA enrichment scores of GICs for the ACS, 2 Oligodendrocyte signatures and early-RG signature
			Signature
		GIC Line No.	ACS		OPC Enriched-300		OPC Specific-300		early-RG
		17	0.755816	0.749805	0.609955	0.592266	0.588834	0.57086	0.748184	0.745198
		18	0.595453	0.601629	0.567074	0.570305	0.554975	0.557295	0.77173	0.773309
		19	0.659613	0.663267	0.542876	0.553786	0.530601	0.544816	0.75857	0.75599
		26	0.640652	0.603517	0.549729	0.617238	0.533257	0.590635	0.737182	0.755385
		30	0.7115	0.703695	0.573786	0.606739	0.559707	0.588429	0.744274	0.753861
		31	0.676063	0.664521	0.605775	0.607833	0.596659	0.597844	0.773511	0.781325
		50	0.653312	0.582369	0.57598	0.560753	0.567304	0.558948	0.752987	0.7483
		52	0.594672	0.593751	0.574827	0.582857	0.557697	0.565248	0.751393	0.751609
		54	0.564437	0.564914	0.543003	0.544045	0.529676	0.532594	0.746843	0.747437
		61	0.567489	0.565966	0.59019	0.570697	0.582096	0.567803	0.761388	0.757721
	Figure 3-figure supplement 1 B	ssGSEA enrichment scores of HGCC GICs for the ACS and 2 Oligodendrocyte signatures					Figure 3-figure supplement 1 C	ssGSEA enrichment scores of matched bulk FFPE tumour tissue of GICs for the ACS and 2 Oligodendrocyte signatures
		Cell Line	ACS Score	OPC Enriched-300	OPC Specific-300			Patient	ACS Score	OPC Enriched-300	OPC Specific-300
		U3102	1.0919	0.460945	0.507284			18	0.766957	0.84255	0.783236
		U3123	0.823236	0.357933	0.522133			19	0.729383	0.919181	0.876824
		U3129	0.540136	0.405092	0.470408			30	0.785362	0.873455	0.822271
		U3137	0.967854	0.436372	0.491952			31	0.711306	1.0062	0.937723
		U3140	0.922417	0.367675	0.456695			17	0.797361	0.81236	0.759057
		U3146	0.521223	0.522679	0.565316			50	0.766033	0.752755	0.679405
		U3164	0.488428	0.51402	0.545897			54	0.832957	0.852502	0.787208
		U3167	0.801454	0.559832	0.59377			61	0.699753	0.802689	0.729308
		U3169	0.658141	0.392593	0.561289			26	0.590939	0.640921	0.590018
		U3172	0.744247	0.317745	0.453225			52	0.773071	0.738804	0.707726
		U3173	0.948354	0.448195	0.601811
		U3179	0.520575	0.428701	0.496088
		U3180	0.628512	0.331044	0.433175
		U3182	0.717746	0.525168	0.63162
		U3187	0.904841	0.495482	0.552971
		U3202	0.809255	0.335407	0.397392
		U3205	0.684993	0.509988	0.671872
		U3206	0.563312	0.569054	0.571153
		U3212	1.04534	0.543172	0.606985
		U3213	1.1542	0.471059	0.567932
		U3214	1.09854	0.430769	0.543312
		U3217	0.992391	0.426018	0.459787
		U3220	0.950315	0.407183	0.537941
		U3221	1.04277	0.474638	0.56012
		U3226	0.834118	0.415234	0.580339
		U3230	1.02884	0.506111	0.612371
		U3233	1.0313	0.457173	0.533535
		U3235	0.966118	0.545486	0.602594
		U3242	1.0502	0.482402	0.645149
		U3243	0.712256	0.461851	0.560519
		U3245	0.516453	0.423356	0.542442
		U3253	1.11925	0.486342	0.532695
		U3257	1.00469	0.480251	0.550309
		U3263	0.587781	0.400217	0.485753
		U3265	0.522034	0.413266	0.491627
		U3272	1.07793	0.347928	0.498268
		U3274	1.14486	0.554634	0.570523
		U3275	0.919001	0.508194	0.545074
		U3279	0.929743	0.52809	0.581388
		U3281	0.954419	0.530082	0.582478
		U3289	0.959722	0.390914	0.559052
		U3291	0.875331	0.451958	0.606556
		U3299	0.478566	0.759745	0.807604
		stro	0.772506	0.154201	0.335829
		U3002	0.698892	0.37146	0.489473
		U3005	0.577711	0.391732	0.502661
		U3008	0.855138	0.421398	0.52225
		U3009	0.576473	0.359973	0.490064
		U3013	0.80298	0.666532	0.696449
		U3016	0.775427	0.668393	0.683246
		U3017	0.73022	0.357966	0.484929
		U3019	0.77367	0.606727	0.652421
		U3020	0.684218	0.4998	0.580344
		U3021	0.862358	0.537332	0.63084
		U3024	0.884731	0.500838	0.531649
		U3027	0.995598	0.504554	0.534586
		U3028	0.953137	0.463255	0.566593
		U3029	0.962241	0.529545	0.524432
		U3031	0.927204	0.485038	0.533575
		U3033	0.90494	0.280236	0.41194
		U3034	1.07924	0.481931	0.5585
		U3035	1.03211	0.418779	0.558225
		U3037	0.968619	0.472521	0.600595
		U3039	1.09384	0.349713	0.48545
		U3042	0.729453	0.409732	0.497084
		U3046	0.825874	0.402116	0.569381
		U3047	0.517066	0.608222	0.664334
		U3048	0.587503	0.370775	0.44134
		U3051	0.88925	0.519129	0.625561
		U3053	0.9202	0.57378	0.638406
		U3054	0.802363	0.468212	0.603559
		U3056	0.70525	0.348797	0.515789
		U3060	0.987856	0.422299	0.532904
		U3062	1.08822	0.395224	0.468212
		U3065	0.753349	0.353495	0.46073
		U3067	1.11037	0.334906	0.501331
		U3068	1.05669	0.533378	0.636053
		U3071	0.983507	0.468835	0.543665
		U3073	0.821307	0.434763	0.495698
		U3078	0.795457	0.335127	0.455988
		U3082	0.608138	0.536962	0.626367
		U3084	0.881786	0.469726	0.584643
		U3085	0.696997	0.675218	0.679619
		U3086	0.607903	0.382104	0.485118
		U3088	0.987594	0.483963	0.58241
		U3093	0.915671	0.585515	0.624291
		U3101	0.879805	0.449439	0.477881
		U3102.1	0.961821	0.233464	0.422249
		U3104	0.547711	0.417712	0.54992
		U3110	0.915337	0.449356	0.514201
		U3117	0.999382	0.523715	0.554105
		U3118	0.978261	0.530699	0.602193
		U3121	0.885548	0.389044	0.484077
		U3123.1	0.924951	0.415753	0.483274
		U3129.1	0.706531	0.578132	0.547598
		U3137.1	0.992203	0.491678	0.539066
		U3140.1	0.979382	0.411291	0.475026
		U3146.1	0.630617	0.431305	0.539022
		U3151	1.12089	0.393178	0.463199
		U3155	0.979888	0.383543	0.517534
		U3164.1	0.617792	0.463689	0.535884
		U3167.1	0.798871	0.560421	0.632278
		U3169.1	0.703717	0.427462	0.53616
		U3172.1	0.909883	0.382929	0.498488
		U3173.1	1.02704	0.484702	0.566718
		U3175	0.527108	0.310235	0.432086
		U3180.1	0.672021	0.412557	0.485042
		U3181	1.07823	0.338164	0.486207
		U3189	0.776091	0.373795	0.55094
		U3191	0.741954	0.420063	0.514584
		U3196	0.487858	0.853763	0.781797
		U3198	0.620139	0.634258	0.657438
		U3201	1.14738	0.446252	0.587367
		U3202.1	0.959602	0.462525	0.52538
	Figure 3-figure supplement 1 D	ssGSEA enrichment scores of pseuobulk scRNAseq samples for signatures from Neftel et al.
			MES2	MES1	AC	OPC	NPC1	NPC2
		MGH102	1.46302	1.41567	1.50806	1.61933	1.66756	1.66345
		MGH105	1.72892	1.94152	1.80043	1.35334	1.14584	1.03948
		MGH114	1.3354	1.65618	1.84552	1.49861	1.1257	1.07493
		MGH115	1.69535	1.67882	1.89148	1.36964	1.31316	0.941522
		MGH118	1.48207	1.58126	1.87939	1.60751	1.52312	1.10158
		MGH124	1.69087	1.77403	1.659	1.35399	1.48768	1.7202
		MGH125	1.29201	1.5603	1.83377	1.60341	1.6988	1.64213
		MGH126	1.65334	1.60585	1.08965	1.13653	1.28228	1.52869
		MGH143	1.49105	1.67311	1.77427	1.12313	1.18302	1.14104
		ND1	1.60458	1.47902	1.78001	1.65412	1.79793	1.69615
		ND2	1.78194	1.81872	1.92196	1.56088	1.58107	1.39529
		ND3	1.72779	1.2524	1.49551	1.80427	1.76237	1.77087
		ND4	1.55002	1.63418	1.84929	1.29192	1.50597	1.41035
		ND5	1.58715	1.34118	1.79986	1.80082	1.75522	1.63547
		ND6	1.49903	1.56976	1.75512	1.6485	1.70987	1.58337
	Figure 3-figure supplement 1 E	% Cells from scRNAseq datasets enriched for signatures from Neftel et al.
		Row	patient	module	n_cells	percent_cells
		1	MGH102	AC	67	5.46493
		2	MGH105	AC	396	14.1126
		3	MGH114	AC	29	33.3333
		4	MGH115	AC	447	68.5583
		5	MGH118	AC	144	62.069
		6	MGH124	AC	94	7.1701
		7	MGH125	AC	276	30.9764
		8	MGH126	AC	1	1.42857
		9	MGH143	AC	1238	57.1297
		10	ND1	AC	166	26.7742
		11	ND2	AC	608	64.0674
		12	ND3	AC	38	2.16278
		13	ND4	AC	651	65.8241
		14	ND5	AC	1472	47.6684
		15	ND6	AC	289	27.0093
		16	MGH102	MES1	14	1.14192
		17	MGH105	MES1	2179	77.655
		18	MGH114	MES1	52	59.7701
		19	MGH115	MES1	47	7.20859
		20	MGH118	MES1	16	6.89655
		21	MGH124	MES1	240	18.3066
		22	MGH125	MES1	4	0.448934
		23	MGH126	MES1	5	7.14286
		24	MGH143	MES1	799	36.8713
		25	ND1	MES1	21	3.3871
		26	ND2	MES1	88	9.27292
		27	ND3	MES1	5	0.284576
		28	ND4	MES1	57	5.7634
		29	ND5	MES1	43	1.39249
		30	ND6	MES1	54	5.04673
		31	MGH102	MES2	52	4.24144
		32	MGH105	MES2	212	7.55524
		33	MGH114	MES2	4	4.5977
		34	MGH115	MES2	145	22.2393
		35	MGH118	MES2	10	4.31034
		36	MGH124	MES2	168	12.8146
		37	MGH125	MES2	11	1.23457
		38	MGH126	MES2	37	52.8571
		39	MGH143	MES2	101	4.66082
		40	ND1	MES2	91	14.6774
		41	ND2	MES2	121	12.7503
		42	ND3	MES2	417	23.7336
		43	ND4	MES2	79	7.98787
		44	ND5	MES2	275	8.90544
		45	ND6	MES2	78	7.28972
		46	MGH102	NPC1	368	30.0163
		47	MGH105	NPC1	11	0.392017
		48	MGH114	NPC1	0	0
		49	MGH115	NPC1	10	1.53374
		50	MGH118	NPC1	39	16.8103
		51	MGH124	NPC1	46	3.50877
		52	MGH125	NPC1	441	49.4949
		53	MGH126	NPC1	10	14.2857
		54	MGH143	NPC1	17	0.784495
		55	ND1	NPC1	208	33.5484
		56	ND2	NPC1	93	9.79979
		57	ND3	NPC1	211	12.0091
		58	ND4	NPC1	126	12.7401
		59	ND5	NPC1	530	17.1632
		60	ND6	NPC1	407	38.0374
		61	MGH102	NPC2	577	47.0636
		62	MGH105	NPC2	2	0.0712758
		63	MGH114	NPC2	0	0
		64	MGH115	NPC2	0	0
		65	MGH118	NPC2	0	0
		66	MGH124	NPC2	725	55.3013
		67	MGH125	NPC2	129	14.4781
		68	MGH126	NPC2	15	21.4286
		69	MGH143	NPC2	12	0.553761
		70	ND1	NPC2	93	15
		71	ND2	NPC2	22	2.31823
		72	ND3	NPC2	386	21.9693
		73	ND4	NPC2	74	7.48231
		74	ND5	NPC2	171	5.53756
		75	ND6	NPC2	88	8.2243
		76	MGH102	OPC	148	12.0718
		77	MGH105	OPC	6	0.213828
		78	MGH114	OPC	2	2.29885
		79	MGH115	OPC	3	0.460123
		80	MGH118	OPC	23	9.91379
		81	MGH124	OPC	38	2.89855
		82	MGH125	OPC	30	3.367
		83	MGH126	OPC	2	2.85714
		84	MGH143	OPC	0	0
		85	ND1	OPC	41	6.6129
		86	ND2	OPC	17	1.79136
		87	ND3	OPC	700	39.8406
		88	ND4	OPC	2	0.202224
		89	ND5	OPC	597	19.3329
		90	ND6	OPC	154	14.3925
	Figure 3-figure supplement 1 H	ssGSEA enrichment scores of 4 bias & enriched GICs for signatures from Neftel et al.
			GIC Line
		Signature	17		19		30		31
		MES1_SUVA	0.992206	0.993998	0.91366	0.909792	0.937152	0.937391	0.911403	0.915671
		MES2_SUVA	0.917063	0.903926	0.874777	0.878102	0.885102	0.873196	0.883316	0.89604
		NPC1_SUVA	0.701253	0.714432	0.777261	0.791506	0.71122	0.794937	0.943114	0.924465
		NPC2_SUVA	0.692281	0.69012	0.752445	0.749458	0.721937	0.756758	0.890876	0.878327
		OPC_SUVA	0.697302	0.709222	0.679879	0.732638	0.729583	0.809035	0.847135	0.818412
		AC_SUVA	0.919875	0.948535	0.860107	0.910416	0.900469	0.971621	0.952955	0.937581
	Figure 3-figure supplement 1 I	Gene list overlap between ACS and Figure 3F DEGs			Figure 3-figure supplement 1 J	Gene list overlap between ACS and Figure 3G DEGs			Figure 3-figure supplement 1 K	Gene list overlap between Figure 3F & Figure 3G DEGs
		ACS Genes	Figure 3F DEGs			ACS Genes	Figure 3G DEGs			Figure 3F DEGs	Figure 3G DEGs
		ENSG00000142552	ENSG00000106333			RCN3	FSTL1			PCOLCE	FSTL1
		ENSG00000114859	ENSG00000180044			CLCN2	BNC2			C3orf80	BNC2
		ENSG00000155760	ENSG00000135318			FZD7	ZFPM2			NT5E	ZFPM2
		ENSG00000101825	ENSG00000162576			MXRA5	COL6A2			MXRA8	COL6A2
		ENSG00000000971	ENSG00000164619			CFH	RUNX2			BMPER	RUNX2
		ENSG00000141756	ENSG00000177374			FKBP10	EDIL3			HIC1	EDIL3
		ENSG00000111341	ENSG00000080573			MGP	TTC39B			COL5A3	TTC39B
		ENSG00000163661	ENSG00000101825			PTX3	GBP1P1			MXRA5	GBP1P1
		ENSG00000232995	ENSG00000117122			RGS5	CLMP			MFAP2	CLMP
		ENSG00000143248	ENSG00000137331			RGS5	GBP1			IER3	GBP1
		ENSG00000087116	ENSG00000134013			ADAMTS2	TGFBI			LOXL2	TGFBI
		ENSG00000105255	ENSG00000171812			FSD1	OLIG2			COL8A2	OLIG2
		ENSG00000150551	ENSG00000123342			LYPD1	CASP4			MMP19	CASP4
		ENSG00000221955	ENSG00000154930			SLC12A8	GBP2			ACSS1	GBP2
		ENSG00000133110	ENSG00000106991			POSTN	SYNC			ENG	SYNC
		ENSG00000117115	ENSG00000138080			PADI2	FAM114A1			EMILIN1	FAM114A1
		ENSG00000162692	ENSG00000136002			VCAM1	SEC11C			ARHGEF4	SEC11C
		ENSG00000162595	ENSG00000105825			DIRAS3	AIM1			TFPI2	AIM1
		ENSG00000140416	ENSG00000106538			TPM1	AHNAK			RARRES2	AHNAK
		ENSG00000205403	ENSG00000128591			CFI	KCNA2			FLNC	KCNA2
		ENSG00000144681	ENSG00000111799			STAC	DAB2			COL12A1	DAB2
		ENSG00000135424	ENSG00000113083			ITGA7	ARC			LOX	ARC
		ENSG00000154096	ENSG00000187955			THY1	GBP3			COL14A1	GBP3
		ENSG00000117586	ENSG00000116741			TNFSF4	PSMB9			RGS2	PSMB9
		ENSG00000115414	ENSG00000120820			FN1	FAM125B			GLT8D2	FAM125B
		ENSG00000170381	ENSG00000020181			SEMA3E	PPFIA2			ADGRA2	PPFIA2
		ENSG00000110492	ENSG00000162733			MDK	OLFM1			DDR2	OLFM1
		ENSG00000140557	ENSG00000132000			ST8SIA2	CHST11			PODNL1	CHST11
		ENSG00000213347	ENSG00000161921			MXD3	ANKRD20A5P			CXCL16	ANKRD20A5P
		ENSG00000139278	ENSG00000120156			GLIPR1	FOXN2			TEK	FOXN2
		ENSG00000185585	ENSG00000144824			OLFML2A	ANKRD13B			PHLDB2	ANKRD13B
		ENSG00000087303	ENSG00000166250			NID2	BTN3A3			CLMP	BTN3A3
		ENSG00000134222	ENSG00000164220			PSRC1	ITGBL1			F2RL2	ITGBL1
		ENSG00000166669	ENSG00000118523			ATF7IP2	TWIST2			CCN2	TWIST2
		ENSG00000134853	ENSG00000164692			PDGFRA	CITED2			COL1A2	CITED2
		ENSG00000107796	ENSG00000232815			ACTA2	CARD16			DUX4L50	CARD16
		ENSG00000099864	ENSG00000113749			PALM	ST3GAL6			HRH2	ST3GAL6
		ENSG00000106538	ENSG00000144843			RARRES2	ANKRD20A11P			ADPRH	ANKRD20A11P
		ENSG00000143320	ENSG00000082497			CRABP2	PLP1			SERTAD4	PLP1
		ENSG00000114115	ENSG00000143387			RBP1	MAN1A1			CTSK	MAN1A1
		ENSG00000182326	ENSG00000141837			C1S	GFPT2			CACNA1A	GFPT2
		ENSG00000128510	ENSG00000163430			CPA4	LACC1			FSTL1	LACC1
		ENSG00000163017	ENSG00000163531			ACTG2	KCNQ2			NFASC	KCNQ2
		ENSG00000158050	ENSG00000179954			DUSP2	SMG9			SSC5D	SMG9
		ENSG00000180340	ENSG00000170075			FZD2	LOC100507009			GPR37L1	LOC100507009
		ENSG00000106484	ENSG00000253537			MEST	PAWR			PCDHGA7	PAWR
		ENSG00000233450	ENSG00000135862			KIFC1	ANKRD20A3			LAMC1	ANKRD20A3
		ENSG00000168077	ENSG00000142798			SCARA3	OLIG1			HSPG2	OLIG1
		ENSG00000120820	ENSG00000166147			GLT8D2	DIP2B			FBN1	DIP2B
		ENSG00000171812	ENSG00000164300			COL8A2	ANKRD20A2			SERINC5	ANKRD20A2
		ENSG00000112769	ENSG00000109220			LAMA4	DDR2			CHIC2	DDR2
		ENSG00000166923	ENSG00000115594			GREM1	SSH3			IL1R1	SSH3
		ENSG00000065534	ENSG00000142632			MYLK	CADM4			ARHGEF19	CADM4
		ENSG00000074047	ENSG00000068078			GLI2	ANKRD20A1			FGFR3	ANKRD20A1
		ENSG00000120885	ENSG00000124126			CLU	ANKRD20A4			PREX1	ANKRD20A4
		ENSG00000166147	ENSG00000140416			FBN1	DBI			TPM1	DBI
		ENSG00000111696	ENSG00000181291			NT5DC3	SERPINE1			TMEM132E	SERPINE1
		ENSG00000035862	ENSG00000092607			TIMP2	SNX9			TBX15	SNX9
		ENSG00000060718	ENSG00000170545			COL11A1	AIF1L			SMAGP	AIF1L
		ENSG00000132688	ENSG00000167178			NES	BVES			ISLR2	BVES
		ENSG00000135074	ENSG00000121577			ADAM19	PLEKHA5			POPDC2	PLEKHA5
		ENSG00000100918	ENSG00000002746			REC8	RALGPS1			HECW1	RALGPS1
		ENSG00000108691	ENSG00000177096			CCL2	TAOK3			PHETA2	TAOK3
		ENSG00000124575	ENSG00000116774			HIST1H1D	TRPM8			OLFML3	TRPM8
		ENSG00000134253	ENSG00000106034			TRIM45	CNN2			CPED1	CNN2
		ENSG00000147536	ENSG00000181649			GINS4	OR56B1			PHLDA2	OR56B1
		ENSG00000171159	ENSG00000179242			C9orf16	NRP1			CDH4	NRP1
		ENSG00000117152	ENSG00000156265			RGS4	IRF1			MAP3K7CL	IRF1
		ENSG00000171557	ENSG00000161638			FGG	CASP1			ITGA5	CASP1
		ENSG00000079931	ENSG00000158270			MOXD1	GAB2			COLEC12	GAB2
		ENSG00000102265	ENSG00000102554			TIMP1	FAM181B			KLF5	FAM181B
		ENSG00000026652	ENSG00000204128			AGPAT4	LOC100144603			C2orf72	LOC100144603
		ENSG00000077092	ENSG00000142173			RARB	COL1A2			COL6A2	COL1A2
		ENSG00000165617	ENSG00000250120			DACT1	LPL			PCDHA10	LPL
		ENSG00000138735	ENSG00000170891			PDE5A	C3orf70			CYTL1	C3orf70
		ENSG00000158258	ENSG00000164122			CLSTN2	EMILIN1			ASB5	EMILIN1
		ENSG00000067445	ENSG00000185585			TRO	ZDHHC22			OLFML2A	ZDHHC22
		ENSG00000130635	ENSG00000173805			COL5A1	FGFBP3			HAP1	FGFBP3
		ENSG00000163531	ENSG00000115232			NFASC	MYO9B			ITGA4	MYO9B
		ENSG00000159231	ENSG00000125462			CBR3	ANKRD20A8P			MIR9-1HG	ANKRD20A8P
		ENSG00000079308	ENSG00000119681			TNS1	SDC2			LTBP2	SDC2
		ENSG00000183580	ENSG00000175084			FBXL7	VPS13C			DES	VPS13C
		ENSG00000173917	ENSG00000139629			HOXB2	BTN3A1			GALNT6	BTN3A1
		ENSG00000198959	ENSG00000178031			TGM2	AXL			ADAMTSL1	AXL
		ENSG00000157613	ENSG00000069702			CREB3L1	MAP2			TGFBR3	MAP2
		ENSG00000113140	ENSG00000204099			SPARC	RARRES3			NEU4	RARRES3
		ENSG00000011465	ENSG00000277196			DCN	CAV1			nan	CAV1
		ENSG00000197467	ENSG00000142156			COL13A1	LOXL1			COL6A1	LOXL1
		ENSG00000076716	ENSG00000149451			GPC4	NNMT			ADAM33	NNMT
		ENSG00000101335	ENSG00000177363			MYL9	LOX			LRRN4CL	LOX
		ENSG00000163520	ENSG00000198542			FBLN2	PPL			ITGBL1	PPL
		ENSG00000128408	ENSG00000240583			RIBC2	PTCHD2			AQP1	PTCHD2
		ENSG00000041982	ENSG00000136603			TNC	COL1A1			SKIL	COL1A1
		ENSG00000092096	ENSG00000157227			SLC22A17	KCNJ10			MMP14	KCNJ10
		ENSG00000111801	ENSG00000108821			BTN3A3	CD44			COL1A1	CD44
		ENSG00000196277	ENSG00000168140			GRM7	LOC100505794			VASN	LOC100505794
		ENSG00000137573	ENSG00000113721			SULF1	NT5DC1			PDGFRB	NT5DC1
		ENSG00000149257	ENSG00000164330			SERPINH1	SOGA1			EBF1	SOGA1
		ENSG00000102359	ENSG00000248866			SRPX2	MOB3C			USP46-DT	MOB3C
		ENSG00000162188	ENSG00000147872			GNG3	BCAN			PLIN2	BCAN
		ENSG00000078098	ENSG00000152104			FAP	MFAP4			PTPN14	MFAP4
		ENSG00000211448	ENSG00000204789			DIO2	PCDH1			ZNF204P	PCDH1
		ENSG00000105968	ENSG00000162745			H2AFV	CFH			OLFML2B	CFH
		ENSG00000144712	ENSG00000150961			CAND2	LRRC4B			SEC24D	LRRC4B
		ENSG00000111058	ENSG00000158859			ACSS3	COL6A1			ADAMTS4	COL6A1
		ENSG00000214548	ENSG00000181458			MEG3	PALLD			TMEM45A	PALLD
		ENSG00000163359	ENSG00000135506			COL6A3	ATP9B			OS9	ATP9B
		ENSG00000142156	ENSG00000187720			COL6A1	MYOF			THSD4	MYOF
		ENSG00000132718	ENSG00000166897			SYT11	PCBP4			ELFN2	PCBP4
		ENSG00000205683	ENSG00000183155			DPF3	PAFAH1B3			RABIF	PAFAH1B3
		ENSG00000113721	ENSG00000163359			PDGFRB	TRIM21			COL6A3	TRIM21
		ENSG00000101134	ENSG00000135074			DOK5	MTMR11			ADAM19	MTMR11
		ENSG00000198467	ENSG00000130635			TPM2	SHC3			COL5A1	SHC3
		ENSG00000056678	ENSG00000109610			KIFC1	RNF180			SOD3	RNF180
		ENSG00000087510	ENSG00000185483			TFAP2C	LOC100506343			ROR1	LOC100506343
		ENSG00000088280	ENSG00000019549			ASAP3	PARP14			SNAI2	PARP14
		ENSG00000035664	ENSG00000168309			DAPK2	TIFA			FAM107A	TIFA
		ENSG00000196557	ENSG00000174600			CACNA1H	TAP1			CMKLR1	TAP1
		ENSG00000054356	ENSG00000152818			PTPRN	MGC21881			UTRN	MGC21881
		ENSG00000003436	ENSG00000205730			TFPI	ZNF227			ITPRIPL2	ZNF227
		ENSG00000113657	ENSG00000157404			DPYSL3	LOC100507463			KIT	LOC100507463
		ENSG00000112118	ENSG00000112294			MCM3	SOCS3			ALDH5A1	SOCS3
		ENSG00000166482	ENSG00000115461			MFAP4	BRSK1			IGFBP5	BRSK1
		ENSG00000105894	ENSG00000083444			PTN	ARPC1B			PLOD1	ARPC1B
		ENSG00000146674	ENSG00000004776			IGFBP3	COL5A2			HSPB6	COL5A2
		ENSG00000141448	ENSG00000142871			GATA6	GPR19			CCN1	GPR19
		ENSG00000116157	ENSG00000154764			GPX7	TRAF4			WNT7A	TRAF4
		ENSG00000180914	ENSG00000164107			OXTR	ENPP1			HAND2	ENPP1
		ENSG00000103489	ENSG00000122861			XYLT1	VCL			PLAU	VCL
		ENSG00000109805	ENSG00000145721			NCAPG	NSUN7			LIX1	NSUN7
		ENSG00000116774	ENSG00000279690			OLFML3	TET1			nan	TET1
		ENSG00000139329	ENSG00000272841			LUM	EPHB3			MAP3K4-AS1	EPHB3
		ENSG00000164434	ENSG00000101335			FABP7	ATP2B4			MYL9	ATP2B4
		ENSG00000006016	ENSG00000205221			CRLF1	RUNX1T1			VIT	RUNX1T1
		ENSG00000101938	ENSG00000150093			CHRDL1	PDE4B			ITGB1	PDE4B
		ENSG00000169184	ENSG00000257315			MN1	TMEM178B			ZBED6	TMEM178B
		ENSG00000137501	ENSG00000105974			SYTL2	ZNF780A			CAV1	ZNF780A
		ENSG00000128606	ENSG00000205929			LRRC17	ADAMTS3			C21orf62	ADAMTS3
		ENSG00000168542	ENSG00000133110			COL3A1	TMEM206			POSTN	TMEM206
		ENSG00000100106	ENSG00000154734			TRIOBP	B4GALT1			ADAMTS1	B4GALT1
		ENSG00000168386	ENSG00000175040			FILIP1L	TAP2			CHST2	TAP2
		ENSG00000131459	ENSG00000176170			GFPT2	PSMB8			SPHK1	PSMB8
		ENSG00000144218	ENSG00000137801			AFF3	CITED1			THBS1	CITED1
		ENSG00000114251	ENSG00000138131			WNT5A	GAN			LOXL4	GAN
		ENSG00000204262	ENSG00000104435			COL5A2	SFRP2			STMN2	SFRP2
		ENSG00000282307	ENSG00000136153			SERPINF1	TRIM24			LMO7	TRIM24
		ENSG00000153976	ENSG00000182379			HS3ST3A1	TMEM14C			NXPH4	TMEM14C
		ENSG00000128656	ENSG00000077942			CHN1	TIMP4			FBLN1	TIMP4
		ENSG00000129038	ENSG00000064655			LOXL1	CSF1			EYA2	CSF1
		ENSG00000166575	ENSG00000182004			TMEM135	PARP12			SNRPE	PARP12
		ENSG00000142173	ENSG00000154175			COL6A2	TSPAN7			ABI3BP	TSPAN7
		ENSG00000172638	ENSG00000183160			EFEMP2	TMEM145			TMEM119	TMEM145
		ENSG00000102384	ENSG00000143333			CENPI	BICC1			RGS16	BICC1
		ENSG00000175745	ENSG00000081923			NR2F1	ZFP30			ATP8B1	ZFP30
		ENSG00000127920	ENSG00000142149			GNG11	ITM2C			HUNK	ITM2C
		ENSG00000165424	ENSG00000130707			ZCCHC24	MRPS18A			ASS1	MRPS18A
		ENSG00000237649	ENSG00000132164			KIFC1	BTN3A2			SLC6A11	BTN3A2
		ENSG00000105290	ENSG00000101188			APLP1	MVP			NTSR1	MVP
		ENSG00000240694	ENSG00000174348			PNMA2	SOX8			PODN	SOX8
		ENSG00000169439	ENSG00000100196			SDC2	TLK1			KDELR3	TLK1
		ENSG00000108821	ENSG00000170955			COL1A1	MYO10			CAVIN3	MYO10
		ENSG00000167779	ENSG00000184144			IGFBP6	NOVA1			CNTN2	NOVA1
		ENSG00000163710	ENSG00000149591			PCOLCE2	COL8A1			TAGLN	COL8A1
		ENSG00000196584	ENSG00000204219			XRCC2	PTGR1			TCEA3	PTGR1
		ENSG00000162645	ENSG00000185070			GBP2	CACNA2D1			FLRT2	CACNA2D1
		ENSG00000198523	ENSG00000168477			PLN	MAP3K1			TNXB	MAP3K1
		ENSG00000164176	ENSG00000106537			EDIL3	CYBASC3			TSPAN13	CYBASC3
		ENSG00000187688	ENSG00000042493			TRPV2	CD109			CAPG	CD109
		ENSG00000149591	ENSG00000163873			TAGLN	MAP2K5			GRIK3	MAP2K5
		ENSG00000124212	ENSG00000159871			PTGIS	FAT3			LYPD5	FAT3
		ENSG00000113083	ENSG00000146674			LOX	EEF1A2			IGFBP3	EEF1A2
		ENSG00000109743	ENSG00000110841			BST1	FAT4			PPFIBP1	FAT4
		ENSG00000164949	ENSG00000135824			GEM	MIMT1			RGS8	MIMT1
		ENSG00000164692	ENSG00000100097			COL1A2	SARS2			LGALS1	SARS2
		ENSG00000118849	ENSG00000114861			RARRES1	ICAM1			FOXP1	ICAM1
		ENSG00000138346	ENSG00000214425			DNA2	SH2D4A			LRRC37A4P	SH2D4A
		ENSG00000204197	ENSG00000104267			KIFC1	LEPROTL1			CA2	LEPROTL1
		ENSG00000107562	ENSG00000184178			CXCL12	KIAA1522			SCFD2	KIAA1522
		ENSG00000166341	ENSG00000116254			DCHS1	MDFIC			CHD5	MDFIC
		ENSG00000128591	ENSG00000137727			FLNC	TSPAN2			ARHGAP20	TSPAN2
		ENSG00000115457	ENSG00000238113			IGFBP2	MANEAL			LINC01410	MANEAL
		ENSG00000106333	ENSG00000138795			PCOLCE	IL15			LEF1	IL15
		ENSG00000113361	ENSG00000128833			CDH6	RHOBTB1			MYO5C	RHOBTB1
		ENSG00000141469	ENSG00000109743			SLC14A1	C1orf21			BST1	C1orf21
		ENSG00000005243	ENSG00000188674			COPZ2	PPP1R1C			C2orf80	PPP1R1C
		ENSG00000171992	ENSG00000197467			SYNPO	SLC6A1			COL13A1	SLC6A1
		ENSG00000159674	ENSG00000091136			SPON2	ZNF431			LAMB1	ZNF431
		ENSG00000038427	ENSG00000172575			VCAN	SLIT1			RASGRP1	SLIT1
		ENSG00000197614	ENSG00000126583			MFAP5	PLSCR4			PRKCG	PLSCR4
		ENSG00000053438	ENSG00000132692			NNAT	ATF7IP			BCAN	ATF7IP
		ENSG00000087245	ENSG00000111885			MMP2	2003-09-01			MAN1A1	2003-09-01
		ENSG00000132386	ENSG00000186815			SERPINF1	CALD1			TPCN1	CALD1
		ENSG00000128342	ENSG00000142552			LIF	PRDM8			RCN3	PRDM8
		ENSG00000130176	ENSG00000112137			CNN1	CYP1B1			PHACTR1	CYP1B1
		ENSG00000132561	ENSG00000122691			MATN2	P2RX7			TWIST1	P2RX7
		ENSG00000119938	ENSG00000135324			PPP1R3C	BICD1			MRAP2	BICD1
		ENSG00000148677	ENSG00000139329			ANKRD1	C4orf34			LUM	C4orf34
		ENSG00000162496	ENSG00000172780			DHRS3	SIPA1L3			RAB43	SIPA1L3
		ENSG00000198914	ENSG00000164591			POU3F3	CTF1			MYOZ3	CTF1
		ENSG00000166963	ENSG00000163378			MAP1A	REV3L			EOGT	REV3L
		ENSG00000183873	ENSG00000267221			SCN5A	TMEM26			C17orf113	TMEM26
		ENSG00000138182	ENSG00000198743			KIF20B	PSTPIP2			SLC5A3	PSTPIP2
		ENSG00000013297	ENSG00000167460			CLDN11	MGC24103			TPM4	MGC24103
		ENSG00000106483	ENSG00000157168			SFRP4	JPH2			NRG1	JPH2
		ENSG00000121621	ENSG00000136149			KIF18A	UNC13A			RPL13AP25	UNC13A
		ENSG00000089472	ENSG00000254585			HEPH	RCN1			MAGEL2	RCN1
		ENSG00000134569	ENSG00000229619			LRP4	SCG3			MBNL1-AS1	SCG3
		ENSG00000168268	ENSG00000162490			NT5DC2	IFI35			DRAXIN	IFI35
		ENSG00000196793	ENSG00000069188			ZNF239	RNF157			SDK2	RNF157
		ENSG00000186310	ENSG00000158615			NAP1L3	OPTN			PPP1R15B	OPTN
		ENSG00000154277	ENSG00000189060			UCHL1	TLR3			H1-0	TLR3
		ENSG00000268089	ENSG00000175426			GABRQ	PTN			PCSK1	PTN
		ENSG00000173894	ENSG00000197879			CBX2	BAG2			MYO1C	BAG2
		ENSG00000011028	ENSG00000163513			MRC2	PHYHIPL			TGFBR2	PHYHIPL
		ENSG00000007372	ENSG00000164398			PAX6	EVC2			ACSL6	EVC2
		ENSG00000162576	ENSG00000072422			MXRA8	LOC148189			RHOBTB1	LOC148189
		ENSG00000115461	ENSG00000116132			IGFBP5	PDCD1LG2			PRRX1	PDCD1LG2
		ENSG00000077782	ENSG00000142408			FGFR1	BCL7A			CACNG8	BCL7A
		ENSG00000160957	ENSG00000182158			RECQL4	NABP1			CREB3L2	NABP1
		ENSG00000148848	ENSG00000128805			ADAM12	CDC42EP3			ARHGAP22	CDC42EP3
		ENSG00000182492	ENSG00000149090			BGN	LOC554249			PAMR1	LOC554249
		ENSG00000140937	ENSG00000115884			CDH11	TAPBP			SDC1	TAPBP
		ENSG00000283802	ENSG00000254122			ADAMTS2	SH3TC2			PCDHGB7	SH3TC2
		ENSG00000285007	ENSG00000136010			REC8	ZNF562			ALDH1L2	ZNF562
		ENSG00000285395	ENSG00000177807			XYLT1	RNY1			KCNJ10	RNY1
		ENSG00000282046	ENSG00000035403			GREM1	PHLPP1			VCL	PHLPP1
		ENSG00000282854	ENSG00000169908			ASAP3	MLXIP			TM4SF1	MLXIP
			ENSG00000197712				ALPK1			FAM114A1	ALPK1
			ENSG00000135454				RYR3			B4GALNT1	RYR3
			ENSG00000277586				GNG4			NEFL	GNG4
			ENSG00000245648				PDGFD			KLRK1-AS1	PDGFD
			ENSG00000075426				HIP1R			FOSL2	HIP1R
			ENSG00000110811				TPCN1			P3H3	TPCN1
			ENSG00000254919				COL21A1			nan	COL21A1
			ENSG00000164932				LOC100507164			CTHRC1	LOC100507164
			ENSG00000158258				CAST			CLSTN2	CAST
			ENSG00000143320				KITLG			CRABP2	KITLG
			ENSG00000108932				SMARCD1			SLC16A6	SMARCD1
			ENSG00000183496				EFR3A			MEX3B	EFR3A
			ENSG00000197256				FLNC			KANK2	FLNC
			ENSG00000075651				MIR22HG			PLD1	MIR22HG
			ENSG00000101144				NDRG2			BMP7	NDRG2
			ENSG00000156049				UQCRFS1			GNA14	UQCRFS1
			ENSG00000197921				PRR4			HES5	PRR4
			ENSG00000105088				SMARCB1			OLFM2	SMARCB1
			ENSG00000171502				TGFBR2			COL24A1	TGFBR2
			ENSG00000144218				PPP1R14C			AFF3	PPP1R14C
			ENSG00000156298				THBS1			TSPAN7	THBS1
			ENSG00000163701				GXYLT2			IL17RE	GXYLT2
			ENSG00000065308				HIST1H4A			TRAM2	HIST1H4A
			ENSG00000267374				GNG7			MIR924HG	GNG7
			ENSG00000161381				MIR4521			PLXDC1	MIR4521
			ENSG00000126562				GPC4			WNK4	GPC4
			ENSG00000141682				CNTFR			PMAIP1	CNTFR
			ENSG00000145416				CCDC97			MARCHF1	CCDC97
			ENSG00000177706				FAM5B			FAM20C	FAM5B
			ENSG00000116285				C2orf72			ERRFI1	C2orf72
			ENSG00000143641				ZNF253			GALNT2	ZNF253
			ENSG00000149257				SGMS2			SERPINH1	SGMS2
			ENSG00000078053				ZNF879			AMPH	ZNF879
			ENSG00000196878				GBP5			LAMB3	GBP5
			ENSG00000075043				RNU12			KCNQ2	RNU12
			ENSG00000185090				OSMR			MANEAL	OSMR
			ENSG00000176142				ATP8B1			TMEM39A	ATP8B1
			ENSG00000111817				LOC400590			DSE	LOC400590
			ENSG00000112297				LDLRAD3			CRYBG1	LDLRAD3
			ENSG00000017483				ALPK2			SLC38A5	ALPK2
			ENSG00000162804				EFEMP2			SNED1	EFEMP2
			ENSG00000011028				TPBG			MRC2	TPBG
			ENSG00000204291				GEM			COL15A1	GEM
			ENSG00000196154				ZNF829			S100A4	ZNF829
			ENSG00000135362				DSE			PRR5L	DSE
			ENSG00000180801				KCNF1			ARSJ	KCNF1
			ENSG00000179862				KSR1			CITED4	KSR1
			ENSG00000113645				LAYN			WWC1	LAYN
			ENSG00000130429				SYT1			ARPC1B	SYT1
			ENSG00000278817				CCDC6			nan	CCDC6
			ENSG00000138829				PLOD2			FBN2	PLOD2
			ENSG00000163536				ZNF317			SERPINI1	ZNF317
			ENSG00000165434				ALK			PGM2L1	ALK
			ENSG00000151491				RASGRP3			EPS8	RASGRP3
			ENSG00000157103				ZMYND8			SLC6A1	ZMYND8
			ENSG00000143369				ATAD2B			ECM1	ATAD2B
			ENSG00000169715				CSPG5			MT1E	CSPG5
			ENSG00000064666				FAM212B			CNN2	FAM212B
			ENSG00000188064				SPTLC3			WNT7B	SPTLC3
			ENSG00000255198				DDX60			SNHG9	DDX60
			ENSG00000273038				ZNF230			nan	ZNF230
			ENSG00000114251				ZNF17			WNT5A	ZNF17
			ENSG00000130590				TTYH1			SAMD10	TTYH1
			ENSG00000117385				MXRA5			P3H1	MXRA5
			ENSG00000183196				ATP13A4			CHST6	ATP13A4
			ENSG00000163710				GLT8D2			PCOLCE2	GLT8D2
			ENSG00000181790				SNTB1			ADGRB1	SNTB1
			ENSG00000103154				CAMK2A			NECAB2	CAMK2A
			ENSG00000174807				TSPAN9			CD248	TSPAN9
			ENSG00000138411				WSCD1			HECW2	WSCD1
			ENSG00000128487				EYA2			SPECC1	EYA2
			ENSG00000164442				RHOQ			CITED2	RHOQ
			ENSG00000178718				PANK3			RPP25	PANK3
			ENSG00000101608				ZNF260			MYL12A	ZNF260
			ENSG00000144596				SEC24D			GRIP2	SEC24D
			ENSG00000204131				SOX6			NHSL2	SOX6
			ENSG00000107957				TSHZ3			SH3PXD2A	TSHZ3
			ENSG00000140092				PPAP2B			FBLN5	PPAP2B
			ENSG00000162493				KCNT2			PDPN	KCNT2
			ENSG00000078549				ST8SIA4			ADCYAP1R1	ST8SIA4
			ENSG00000053438				SLCO4A1			NNAT	SLCO4A1
			ENSG00000166482				DKK3			MFAP4	DKK3
			ENSG00000148604				PPP2R2B			RGR	PPP2R2B
			ENSG00000137936				RRAS			BCAR3	RRAS
			ENSG00000164362				ZNF426			TERT	ZNF426
			ENSG00000170390				CMTM5			DCLK2	CMTM5
			ENSG00000198625				SNORD35B			MDM4	SNORD35B
			ENSG00000163453				LUM			IGFBP7	LUM
			ENSG00000270112				LAMB1			ST8SIA5-DT	LAMB1
			ENSG00000130203				MET			APOE	MET
			ENSG00000160789				GRIA2			LMNA	GRIA2
			ENSG00000132434				GLDC			LANCL2	GLDC
			ENSG00000182218				TWIST1			HHIPL1	TWIST1
			ENSG00000219438				APC			TAFA5	APC
			ENSG00000268496				NCEH1			nan	NCEH1
			ENSG00000007171				LY75			NOS2	LY75
			ENSG00000128713				EFEMP1			HOXD11	EFEMP1
			ENSG00000253293				SHC2			HOXA10	SHC2
			ENSG00000158292				PEG3			GPR153	PEG3
			ENSG00000185624				BMP7			P4HB	BMP7
			ENSG00000236914				CTGF			LINC01852	CTGF
			ENSG00000148908				DPRXP4			RGS10	DPRXP4
			ENSG00000140522				LOC729080			RLBP1	LOC729080
			ENSG00000103740				OMD			ACSBG1	OMD
			ENSG00000138823				ARL8A			MTTP	ARL8A
			ENSG00000173040				TLR6			EVC2	TLR6
			ENSG00000225302				MARK1			nan	MARK1
			ENSG00000153234				CRMP1			NR4A2	CRMP1
			ENSG00000150722				ZNF675			PPP1R1C	ZNF675
			ENSG00000107796				SDC4			ACTA2	SDC4
			ENSG00000129244				ZNF460			ATP1B2	ZNF460
			ENSG00000120899				STK39			PTK2B	STK39
			ENSG00000248334				SAMD9L			WHAMMP2	SAMD9L
			ENSG00000136059				FN1			VILL	FN1
			ENSG00000144199				VASN			FAHD2B	VASN
			ENSG00000183072				CLASP2			NKX2-5	CLASP2
			ENSG00000103381				GPR1			CPPED1	GPR1
			ENSG00000142694				DTX3L			EVA1B	DTX3L
			ENSG00000197457				CLEC2B			STMN3	CLEC2B
			ENSG00000145216				DDX39A			FIP1L1	DDX39A
			ENSG00000123427				ECM2			EEF1AKMT3	ECM2
			ENSG00000134278				SLC7A11			SPIRE1	SLC7A11
			ENSG00000232818				ELF4			RPS2P32	ELF4
			ENSG00000164690				GCFC1			SHH	GCFC1
			ENSG00000166689				SP100			PLEKHA7	SP100
			ENSG00000166896				DNAJC4			ATP23	DNAJC4
			ENSG00000197614				SLC50A1			MFAP5	SLC50A1
			ENSG00000113209				ARID5B			PCDHB5	ARID5B
			ENSG00000150995				SPATA5L1			ITPR1	SPATA5L1
			ENSG00000255150				SIRT2			EID3	SIRT2
			ENSG00000173947				ZNF121			PIFO	ZNF121
			ENSG00000266903				POLD4			CEACAM16-AS1	POLD4
			ENSG00000105605				MIR3676			CACNG7	MIR3676
			ENSG00000100219				UBA7			XBP1	UBA7
			ENSG00000072201				DCBLD2			LNX1	DCBLD2
			ENSG00000224189				NMI			HAGLR	NMI
			ENSG00000223802				GAS7			CERS1	GAS7
			ENSG00000173068				RNF150			BNC2	RNF150
			ENSG00000198467				LRP5			TPM2	LRP5
			ENSG00000128595				PLS3			CALU	PLS3
			ENSG00000133216				CFI			EPHB2	CFI
			ENSG00000164430				FAM188B			CGAS	FAM188B
			ENSG00000279692				GCNT1			nan	GCNT1
			ENSG00000198682				GPR56			PAPSS2	GPR56
			ENSG00000127955				TMOD2			GNAI1	TMOD2
			ENSG00000100314				VGF			CABP7	VGF
			ENSG00000121871				PTRF			SLITRK3	PTRF
			ENSG00000074590				ZNF543			NUAK1	ZNF543
			ENSG00000255874				NOTCH1			PRECSIT	NOTCH1
			ENSG00000262209				ARHGEF9			PCDHGB3	ARHGEF9
			ENSG00000176842				LHFPL4			IRX5	LHFPL4
			ENSG00000211584				FZD7			SLC48A1	FZD7
			ENSG00000132635				HAP1			PCED1A	HAP1
			ENSG00000169604				INTU			ANTXR1	INTU
			ENSG00000198910				HOMER1			L1CAM	HOMER1
			ENSG00000129038				SLC25A43			LOXL1	SLC25A43
			ENSG00000166578				MR1			IQCD	MR1
			ENSG00000144810				NUAK1			COL8A1	NUAK1
			ENSG00000037897				DDX60L			METTL1	DDX60L
			ENSG00000143842				IFI16			SOX13	IFI16
			ENSG00000159314				FAM167A			ARHGAP27	FAM167A
			ENSG00000072954				GLT25D2			TMEM38A	GLT25D2
			ENSG00000148204				ZNF221			CRB2	ZNF221
			ENSG00000246985				ZKSCAN2			SOCS2-AS1	ZKSCAN2
			ENSG00000167614				FAM32A			TTYH1	FAM32A
			ENSG00000250538				SEPW1			nan	SEPW1
			ENSG00000184254				GRIK3			ALDH1A3	GRIK3
			ENSG00000183853				RNFT2			KIRREL1	RNFT2
			ENSG00000127920				TMCO7			GNG11	TMCO7
			ENSG00000115414				TBC1D19			FN1	TBC1D19
			ENSG00000169129				TRIM34			AFAP1L2	TRIM34
			ENSG00000162772				CALCRL			ATF3	CALCRL
			ENSG00000196517				NAT8L			SLC6A9	NAT8L
			ENSG00000072682				TRIM6			P4HA2	TRIM6
			ENSG00000254681				RAB9A			PKD1P5	RAB9A
			ENSG00000168913				ATP8B2			ENHO	ATP8B2
			ENSG00000205364				REXO2			MT1M	REXO2
			ENSG00000135446				CARD8			CDK4	CARD8
			ENSG00000168542				ST5			COL3A1	ST5
			ENSG00000114812				MGA			VIPR1	MGA
			ENSG00000119711				MAMLD1			ALDH6A1	MAMLD1
			ENSG00000186523				SECTM1			FAM86B1	SECTM1
			ENSG00000154898				CYR61			CCDC144CP	CYR61
			ENSG00000166562				ZNF235			SEC11C	ZNF235
			ENSG00000204681				WNT5A			GABBR1	WNT5A
			ENSG00000113070				VASH1			HBEGF	VASH1
			ENSG00000197584				MOXD1			KCNMB2	MOXD1
			ENSG00000227051				CXCL14			C14orf132	CXCL14
			ENSG00000021300				ADAM22			PLEKHB1	ADAM22
			ENSG00000133401				TMPRSS5			PDZD2	TMPRSS5
			ENSG00000002586				POSTN			CD99	POSTN
			ENSG00000100320				PLLP			RBFOX2	PLLP
			ENSG00000186007				SALL2			LEMD1	SALL2
			ENSG00000071073				PTPRB			MGAT4A	PTPRB
			ENSG00000147650				BST1			LRP12	BST1
			ENSG00000186998				LRIG3			EMID1	LRIG3
			ENSG00000185238				FAM196B			PRMT3	FAM196B
			ENSG00000124942				CDHR1			AHNAK	CDHR1
			ENSG00000100918				S100B			REC8	S100B
			ENSG00000111783				MXRA8			RFX4	MXRA8
			ENSG00000036672				SIK2			USP2	SIK2
			ENSG00000250802				EPS8			ZBED3-AS1	EPS8
			ENSG00000071205				RAVER2			ARHGAP10	RAVER2
			ENSG00000101665				TCF12			SMAD7	TCF12
			ENSG00000082126				ZNF45			MPP4	ZNF45
			ENSG00000172935				ASNA1			MRGPRF	ASNA1
			ENSG00000158747				C1RL			NBL1	C1RL
			ENSG00000170876				PCOLCE			TMEM43	PCOLCE
			ENSG00000126778				PGM2L1			SIX1	PGM2L1
			ENSG00000139266				SVIL			MARCHF9	SVIL
			ENSG00000141540				ACTN2			TTYH2	ACTN2
			ENSG00000165478				SPIRE1			HEPACAM	SPIRE1
			ENSG00000140067				HIST2H2BF			FAM181A	HIST2H2BF
			ENSG00000138639				FAP			ARHGAP24	FAP
			ENSG00000088881				TRIM9			EBF4	TRIM9
			ENSG00000133816				EPHA7			MICAL2	EPHA7
			ENSG00000072110				FLJ37644			ACTN1	FLJ37644
			ENSG00000100979				C1orf61			PLTP	C1orf61
			ENSG00000196422				PHF15			PPP1R26	PHF15
			ENSG00000114646				TYRO3			CSPG5	TYRO3
			ENSG00000225151				RPS27L			GOLGA2P7	RPS27L
			ENSG00000135452				ZFP112			TSPAN31	ZFP112
			ENSG00000135439				HAVCR1P1			AGAP2	HAVCR1P1
			ENSG00000217236				C12orf5			SP9	C12orf5
			ENSG00000155090				CADM2			KLF10	CADM2
			ENSG00000105996				STAT1			HOXA2	STAT1
			ENSG00000137959				ITGAV			IFI44L	ITGAV
			ENSG00000152128				AHNAK2			TMEM163	AHNAK2
			ENSG00000165113				ARHGAP20			GKAP1	ARHGAP20
			ENSG00000151490				ARHGAP35			PTPRO	ARHGAP35
			ENSG00000204682				TIMM44			MIR1915HG	TIMM44
			ENSG00000168917				ARHGAP18			SLC35G2	ARHGAP18
			ENSG00000128604				SAE1			IRF5	SAE1
			ENSG00000243244				FCGR2C			STON1	FCGR2C
			ENSG00000135406				KLHL8			PRPH	KLHL8
			ENSG00000135549				MMP16			PKIB	MMP16
			ENSG00000261934				SCARNA10			PCDHGA9	SCARNA10
			ENSG00000185567				CREB5			AHNAK2	CREB5
							DPYSL3				DPYSL3
							MTSS1L				MTSS1L
							BTBD8				BTBD8
							LIPG				LIPG
							RN5S161				RN5S161
							STARD5				STARD5
							PLXNB3				PLXNB3
							ECE1				ECE1
							LOC149837				LOC149837
							SHB				SHB
							S100A10				S100A10
							GNAO1				GNAO1
							SEMA5A				SEMA5A
							NT5E				NT5E
							CGRRF1				CGRRF1
							GLCCI1				GLCCI1
							ZNF566				ZNF566
							PDGFA				PDGFA
							LOC729506				LOC729506
							PAG1				PAG1
							CYB5R2				CYB5R2
							NKAIN1				NKAIN1
							MYT1				MYT1
							POU2F1				POU2F1
							RCN1P2				RCN1P2
							FAM95B1				FAM95B1
							ZNF223				ZNF223
							MFAP5				MFAP5
							AGPHD1				AGPHD1
							MIR340				MIR340
							NAMPTL				NAMPTL
							MYO1B				MYO1B
							CYBRD1				CYBRD1
							BAI1				BAI1
							ITPRIPL2				ITPRIPL2
							COPZ2				COPZ2
							LOC90784				LOC90784
							TMEM43				TMEM43
							HIST1H2AE				HIST1H2AE
							ABHD5				ABHD5
							TLE1P1				TLE1P1
							PLAG1				PLAG1
							KIAA1107				KIAA1107
							LMO4				LMO4
							TLE1				TLE1
							MICAL2				MICAL2
							SERPINB8				SERPINB8
							SMARCA4				SMARCA4
							RLBP1				RLBP1
							LRIG1				LRIG1
							SETD5				SETD5
							SH3BGRL2				SH3BGRL2
							GPR137B				GPR137B
							NEK7				NEK7
							MYL9				MYL9
							GCSH				GCSH
							NCOA7				NCOA7
							RAPGEF4				RAPGEF4
							FLRT3				FLRT3
							NAMPT				NAMPT
							UBE2E2				UBE2E2
							CACNG7				CACNG7
							ZNF615				ZNF615
							HIPK3				HIPK3
							ACSBG1				ACSBG1
							SLC4A4				SLC4A4
							TSL				TSL
							BEND6				BEND6
							BAALC				BAALC
							CASP8				CASP8
							CPQ				CPQ
							ZNF285				ZNF285
							SDC3				SDC3
							MIR4675				MIR4675
							SLC46A3				SLC46A3
							SERTAD4				SERTAD4
							LOC100507088				LOC100507088
							STAC				STAC
							ZNF649				ZNF649
							TNFAIP3				TNFAIP3
							USP25				USP25
							EOGT				EOGT
							ZNF519				ZNF519
							FCGR2A				FCGR2A
							ZNF420				ZNF420
							PLCG1				PLCG1
							CD47				CD47
							TRAF5				TRAF5
							PDIA3P				PDIA3P
							FAM64A				FAM64A
							CERS4				CERS4
							COL6A3				COL6A3
							EPSTI1				EPSTI1
							HAUS8				HAUS8
							BLM				BLM
							SRI				SRI
							RNF165				RNF165
							ZNF397				ZNF397
							CHSY3				CHSY3
							APOL1				APOL1
							ATP5SL				ATP5SL
							IFITM4P				IFITM4P
							PTPRZ1				PTPRZ1
							PAK1				PAK1
							LDHA				LDHA
							OMG				OMG
							SNAI2				SNAI2
							PPM1D				PPM1D
							SNORD3C				SNORD3C
							POLE4				POLE4
							LOC100505481				LOC100505481
							CPNE5				CPNE5
							IFNGR2				IFNGR2
							MASP1				MASP1
							MX1				MX1
							SLC2A13				SLC2A13
							PDE4D				PDE4D
							MAP3K5				MAP3K5
							LOC100287314				LOC100287314
							DHPS				DHPS
							TMEM200A				TMEM200A
							C5orf30				C5orf30
							HEPACAM				HEPACAM
							SERPINF1				SERPINF1
							KIAA1715				KIAA1715
							MIR604				MIR604
							POLDIP3				POLDIP3
							SYNPO				SYNPO
							FNTB				FNTB
							PRRG4				PRRG4
							PTPRM				PTPRM
							SREBF2				SREBF2
							NEXN				NEXN
							GPX8				GPX8
							SCUBE2				SCUBE2
							PTPN14				PTPN14
							HUNK				HUNK
							TNS3				TNS3
							ZNF100				ZNF100
							FAH				FAH
							ADAMTS1				ADAMTS1
							LOC100127888				LOC100127888
							ERI2				ERI2
							MRC2				MRC2
							MAST1				MAST1
							DKK2				DKK2
							COL12A1				COL12A1
							NCKAP5				NCKAP5
							SPATA6				SPATA6
							NXPE3				NXPE3
							VSNL1				VSNL1
							BRD7				BRD7
							LOC100133920				LOC100133920
							MIR3973				MIR3973
							ZNF136				ZNF136
							SKINTL				SKINTL
							SBK1				SBK1
							CCDC122				CCDC122
							MMP19				MMP19
							2007-09-01				2007-09-01
							SH3PXD2B				SH3PXD2B
							C2orf80				C2orf80
							RFX7				RFX7
							ZNF738				ZNF738
							ORAI3				ORAI3
							CYFIP2				CYFIP2
							FBXO32				FBXO32
							TAS2R10				TAS2R10
							USP3				USP3
							ZDHHC11B				ZDHHC11B
							TWSG1				TWSG1
							HRASLS5				HRASLS5
							CTSB				CTSB
							MIDN				MIDN
							ABCC3				ABCC3
							SLC39A14				SLC39A14
							LOC100287623				LOC100287623
							ADAM12				ADAM12
							ANK1				ANK1
							PGAP1				PGAP1
							HIST1H4J				HIST1H4J
							PIP4K2A				PIP4K2A
							ARHGAP24				ARHGAP24
							KCTD9				KCTD9
							SBSPON				SBSPON
							MLLT3				MLLT3
							ZNF776				ZNF776
							CHD7				CHD7
							ERRFI1				ERRFI1
							SAMD9				SAMD9
							SUMF2				SUMF2
							DDX58				DDX58
							IGSF11				IGSF11
							GINS3				GINS3
							PODN				PODN
							SLC35F1				SLC35F1
							GJA1				GJA1
							RALGAPA1				RALGAPA1
							GPHN				GPHN
							NFKBIZ				NFKBIZ
							ATCAY				ATCAY
							PDPR				PDPR
							TAGLN				TAGLN
							ZNF333				ZNF333
							ZNF559				ZNF559
							PTPLAD2				PTPLAD2
							DPT				DPT
							CKB				CKB
							ZNF613				ZNF613
							DAB1				DAB1
							SOX5				SOX5
							IFITM3				IFITM3
							FAM106B				FAM106B
							SP140L				SP140L
							LOC283922				LOC283922
							STK17B				STK17B
							CXXC4				CXXC4
							KIAA1217				KIAA1217
							ANPEP				ANPEP
							SYNPO2				SYNPO2
							GPR39				GPR39
							RAB8B				RAB8B
							OSTC				OSTC
							APBA2				APBA2
							CTSO				CTSO
							C22orf32				C22orf32
							ZNF14				ZNF14
							MYH9				MYH9
							SLC35B3				SLC35B3
							MYEF2				MYEF2
							FOXRED2				FOXRED2
							SKIL				SKIL
							FAM123A				FAM123A
							USP2				USP2
							VPS37B				VPS37B
							FAM176A				FAM176A
							SNORD3A				SNORD3A
							MTSS1				MTSS1
							HIST1H2BB				HIST1H2BB
							ZNF678				ZNF678
							MSRB3				MSRB3
							SLC25A24				SLC25A24
							C21orf7				C21orf7
							PPP2R5A				PPP2R5A
							SNORD123				SNORD123
							PARVA				PARVA
							ERAP1				ERAP1
							SNORA50				SNORA50
							C5orf15				C5orf15
							GDF11				GDF11
							SRPX2				SRPX2
							ITGA11				ITGA11
							PRICKLE1				PRICKLE1
							ZNF546				ZNF546
							GPR124				GPR124
							FRRS1				FRRS1
							RAB38				RAB38
							LIN7A				LIN7A
							GLIPR1				GLIPR1
							COL3A1				COL3A1
							FAM129B				FAM129B
							LY6E				LY6E
							SERTAD2				SERTAD2
							ASS1				ASS1
							MIR2110				MIR2110
							C1orf140				C1orf140
							KIF1A				KIF1A
							LOC646543				LOC646543
							DDHD1				DDHD1
							RN5S196				RN5S196
							OSTF1				OSTF1
							MARVELD1				MARVELD1
							IFITM1				IFITM1
							TNFSF10				TNFSF10
							CASP6				CASP6
							NTNG1				NTNG1
							EPHB2				EPHB2
							COBL				COBL
							SRPR				SRPR
							RUNDC3A				RUNDC3A
							HEG1				HEG1
							ARL6IP5				ARL6IP5
							ITGB4				ITGB4
							AGAP1				AGAP1
							PDE9A				PDE9A
							DNER				DNER
							HIST1H1T				HIST1H1T
							IFI30				IFI30
							FLRT2				FLRT2
							ANKRD5				ANKRD5
							CERS1				CERS1
							DHX58				DHX58
							HTR2A				HTR2A
							LOC100507127				LOC100507127
							PCDH18				PCDH18
							TAS2R14				TAS2R14
							COL25A1				COL25A1
							ARSJ				ARSJ
							IFITM2				IFITM2
							ZNF532				ZNF532
							APOL6				APOL6
							TUBB4A				TUBB4A
							ANXA2P2				ANXA2P2
							GINS2				GINS2
							CCDC77				CCDC77
							RNF144B				RNF144B
							MGST1				MGST1
							PODXL2				PODXL2
							GALNT5				GALNT5
							LOC283174				LOC283174
							LCA5				LCA5
							TRAK1				TRAK1
							TRANK1				TRANK1
							SPC25				SPC25
							ZSCAN29				ZSCAN29
							ZFP14				ZFP14
							UFM1				UFM1
							ARID4A				ARID4A
							EEPD1				EEPD1
							SLC24A3				SLC24A3
							ERBB4				ERBB4
							PDE5A				PDE5A
							SLIT3				SLIT3
							HIVEP1				HIVEP1
							KIAA1804				KIAA1804
							ZNF714				ZNF714
							COL24A1				COL24A1
							TMEM81				TMEM81
							C14orf45				C14orf45
							PTAR1				PTAR1
							SCAMP5				SCAMP5
							CD200				CD200
							NMRK1				NMRK1
							PLP2				PLP2
							FAM65B				FAM65B
							LRP12				LRP12
							SNORA46				SNORA46
							B3GAT1				B3GAT1
							HGF				HGF
							ARHGAP29				ARHGAP29
							ZNF211				ZNF211
							MYD88				MYD88
							SCG5				SCG5
							RTTN				RTTN
							PIK3C2B				PIK3C2B
							CHKA				CHKA
							TPMT				TPMT
							TMEM220				TMEM220
							CDC34				CDC34
							IFIH1				IFIH1
							SOX9				SOX9
							ODF2L				ODF2L
							ELAVL4				ELAVL4
							NIPSNAP3B				NIPSNAP3B
							C6orf141				C6orf141
							FAM131B				FAM131B
							LOC100289026				LOC100289026
							LOC100507447				LOC100507447
							SSFA2				SSFA2
							PION				PION
							LOC100127983				LOC100127983
							ASPN				ASPN
							MXRA7				MXRA7
							FAM189A2				FAM189A2
							FNDC3B				FNDC3B
							TEAD1				TEAD1
							C11orf41				C11orf41
							YAP1				YAP1
							C9orf64				C9orf64
							CABYR				CABYR
							SHC1				SHC1
							ZNF345				ZNF345
							AGBL2				AGBL2
							C11orf70				C11orf70
							NHS				NHS
							LOC100132891				LOC100132891
							SPECC1				SPECC1
							ZNF708				ZNF708
							KLHDC8A				KLHDC8A
							MIOS				MIOS
							VAT1L				VAT1L
							CTSC				CTSC
							BRP44L				BRP44L
							OCIAD2				OCIAD2
							ITGB1				ITGB1
							F2RL2				F2RL2
							RRAS2				RRAS2
							A2M				A2M
							TMEM132B				TMEM132B
							HOXB5				HOXB5
							HIST1H3A				HIST1H3A
							ENPP5				ENPP5
							C19orf48				C19orf48
							RBM7				RBM7
							ST6GALNAC3				ST6GALNAC3
							B3GALT1				B3GALT1
							DLL3				DLL3
							SOSTDC1				SOSTDC1
							IGSF9B				IGSF9B
							RBP1				RBP1
							EVC				EVC
							LOC100506304				LOC100506304
							FEZF1				FEZF1
							PDXP				PDXP
							IFT57				IFT57
							MAPK4				MAPK4
							ITGA4				ITGA4
							LPPR5				LPPR5
							SLFN5				SLFN5
							CUL7				CUL7
							IGF1				IGF1
							GATA6				GATA6
							RNY4				RNY4
							MAPK8IP1				MAPK8IP1
							MBNL3				MBNL3
							NAV3				NAV3
							ZNF850				ZNF850
							KIAA1244				KIAA1244
							CNTNAP3B				CNTNAP3B
							SNORD3B				SNORD3B
							PMP2				PMP2
							MIR3198				MIR3198
							PARP11				PARP11
							P4HA2				P4HA2
							SECISBP2L				SECISBP2L
							RNF182				RNF182
							ZNF85				ZNF85
							CCL2				CCL2
							ARHGAP19				ARHGAP19
							PLA2R1				PLA2R1
							GAD1				GAD1
							HEPN1				HEPN1
							HOXB2				HOXB2
							SEMA3C				SEMA3C
							NIPSNAP3A				NIPSNAP3A
							NES				NES
							PLAU				PLAU
					Note: there were 10 ACS Gene IDs that gave duplicated names, these duplicates were added to the ACS only portion of the venn				Note: there were 9 Figure 3F DEG Gene IDs that returned NA upon gene name conversion, these 9 Gene IDs with no gene name were added to the Figure 3F only portion of the venn
