# Supplementary material for: Global hypo-methylation in a proportion of glioblastoma enriched for an astrocytic signature is associated with increased invasion and altered immune landscape
Source: eLife journal article supplement (doi:10.7554/elife.77335), 2022-11-02
Supplement: fig4-data1 [file 19.xlsx]

## Sheet: Sheet1
28 common elements in "19 Venn R.O.I." and "ACS Genes":
ENSG00000035862
ENSG00000003436
ENSG00000129038
ENSG00000087245
ENSG00000102359
ENSG00000172638
ENSG00000175745
ENSG00000102265
ENSG00000139278
ENSG00000173894
ENSG00000112769
ENSG00000135074
ENSG00000180914
ENSG00000117586
ENSG00000113083
ENSG00000111341
ENSG00000119938
ENSG00000079931
ENSG00000128342
ENSG00000131459
ENSG00000159231
ENSG00000128591
ENSG00000106484
ENSG00000053438
ENSG00000185585
ENSG00000128510
ENSG00000106538
ENSG00000167779
