# Supplementary material for: Global hypo-methylation in a proportion of glioblastoma enriched for an astrocytic signature is associated with increased invasion and altered immune landscape
Source: eLife journal article supplement (doi:10.7554/elife.77335), 2022-11-02
Supplement: fig4-data1 [file 31.xlsx]

## Sheet: Sheet1
19 common elements in "List 1" and "ACS Genes":
ENSG00000035862
ENSG00000164949
ENSG00000205683
ENSG00000111801
ENSG00000003436
ENSG00000128342
ENSG00000102359
ENSG00000172638
ENSG00000143320
ENSG00000139278
ENSG00000185585
ENSG00000011028
ENSG00000102265
ENSG00000221955
ENSG00000159231
ENSG00000142173
ENSG00000142156
ENSG00000173894
ENSG00000106538
