# Supplementary material for: Global hypo-methylation in a proportion of glioblastoma enriched for an astrocytic signature is associated with increased invasion and altered immune landscape
Source: eLife journal article supplement (doi:10.7554/elife.77335), 2022-11-02
Supplement: fig4-data1 [file 50.xlsx]

## Sheet: Sheet1
14 common elements in "50 Venn R.O.I." and "ACS Genes":
ENSG00000144681
ENSG00000035862
ENSG00000114115
ENSG00000134253
ENSG00000140557
ENSG00000106538
ENSG00000162595
ENSG00000169439
ENSG00000111801
ENSG00000143248
ENSG00000143320
ENSG00000172638
ENSG00000170381
ENSG00000111341
