# Supplementary material for: Global hypo-methylation in a proportion of glioblastoma enriched for an astrocytic signature is associated with increased invasion and altered immune landscape
Source: eLife journal article supplement (doi:10.7554/elife.77335), 2022-11-02
Supplement: fig4-data1 [file 52.xlsx]

## Sheet: Sheet1
16 common elements in "52 Venn R.O.I." and "ACS Genes":
ENSG00000172638
ENSG00000003436
ENSG00000053438
ENSG00000214548
ENSG00000111801
ENSG00000173894
ENSG00000221955
ENSG00000005243
ENSG00000159231
ENSG00000102265
ENSG00000087116
ENSG00000074047
ENSG00000143320
ENSG00000185585
ENSG00000087245
ENSG00000117115
