# Supplementary material for: Global hypo-methylation in a proportion of glioblastoma enriched for an astrocytic signature is associated with increased invasion and altered immune landscape
Source: eLife journal article supplement (doi:10.7554/elife.77335), 2022-11-02
Supplement: fig4-data1 [file Figure_4_C_E_G-I_K-M_O.xlsx]

## Sheet: Figure 4
	Figure 4C	Invasive index scores of xenografts from BE-GICs and Other GICs
			BE-GICs				Other GICs
		GIC Line No.	17	19	30	31	18	24	26	49	50	52	54	61
		Invasive Index	3.77	7.82	16.24	22.97	2.64	3.22	1.76	3.33	4.96	7.43	1.52	1.49
	Note: For DEG lists for Figure 4D see separate file
	Figure 4E	Expression (TPM) of SRPX2 in various patient cell types
			Cell Type
		Patient No.	iAPC		iNSC		GIC
		19	104.995	64.0249	0.946949	0.893422	43.0993	38.4791
		31	78.1176	53.9993	2.15828	0.588173	17.9226	20.8076
		IDH-M	67.5036	151.555	2.3319	4.49216	4.64165	2.20911
		50	48.0021	51.6206	9.20554	4.65153	14.0404	7.98878
		52	31.749	61.3181	1.27573	1.73593	7.53675	3.22409
	Figure 4G	Expression (normalised probe intensity) of SRPX2 in HGCC GICs classified as Bias & Enriched or Non-Bias & Non-Enriched
		Bias & Enriched													Non-Bias & Non-Enriched
		9.17783	8.1773	8.95449	8.49974	9.55954	8.7568	8.51456	9.01192	8.1398	6.50936	8.4168	8.93742	8.29845	5.81474	9.11477	7.57322	6.52828	6.12577	6.62431
	Figure 4I	SRPX2 mRNA expression relative to shSCR control
		U3118 shSCR	U3118 shSRPX2_90	U3118 shSRPX2_91	GIC19 shSCR	GIC19 shSRPX2_90	GIC19 shSRPX2_91
		0.861282	0.451945	0.493779	0.912822	0.302975	0.394161
		1.39979	0.295613	0.279094	0.998494	0.18243	0.186877
		0.829453	0.269364	0.213538	1.09716	0.106095	0.332165
	Figure 4K	SRPX2 protein expression relative to shSCR control
		GIC19 shSCR	GIC19 shSRPX2_90	GIC19 shSRPX2_91	U3118 shSCR	U3118 shSRPX2_90	U3118 shSRPX2_91
		0.985989	0.807846	1.29023	0.653527	0.149267	0.22932
		0.693917	0.502319	0.72829	0.99189	0.0122127	0.0197396
		1.32009	0.748232	0.978127	1.35458	0.00903305	0.258877
	Figure 4L	Transwell invasion assay results: average number of nuclei detected per image field from 5 images of each membrane, 3 membranes per replicate, 3-4 biological replicates
		Replicate	U3118_shSCR			U3118_shSRPX2_90			U3118_shSRPX2_91			GIC19_shSCR			GIC19_shSRPX2_90			GIC19_shSRPX2_91
		1	246.8	195.8	208.4	89	67.4	57	54.4	60.2	52.6	617	658.667	519.25	207	159.25	162	175.4	233	143.6
		2	259.6	260	287.2	112	40.8	44.4	71.6	80.4	85.2	423.8	332	335.2	166.6	174.4	165.2	358	340.2	277.6
		3	144.8	158.75	166	61	40.8	37.8	28.4	28.6	26.2	335.4	383.2	371.2	136.6	297.333	304.6	340.8	206.8	218.2
		4	267.4	294.6	313.2	33	35.75	33.8	23.2	28.2	30.8	451.2	312.4	362.333
	Figure 4M	Expression of SRPX2, expressed as Z-Score, across different tumour regions, data from Ivy GAP
		Leading Edge	Infiltrating Tumor	Cellular Tumor	Perinecrotic zone	Pseudopalisading cells around necrosis	Hyperplastic blood vessels in cellular tumor	Microvascular proliferation
		0	-0.734	-0.9488	-0.6902	-0.9249	0.8492	1.017
		0	-0.3273	-1.1738	0.288	0.2818	1.7056	1.0564
		0	-0.9387	-0.895	1.1615	0.2353	0.9726	0.7616
		-0.136	1.6444	1.0644	0.3994	-0.82	0.4768	0.9611
		-0.6548	1.7082	0.6111	-0.1927	1.1478	0.5638	1.1487
		0	-1.6134	0.2913	-0.9127	1.1652	1.5749	0.8138
		-1.2795	-0.5202	0.703	0.5933	-0.2749	0.8091	0.9579
		0	-0.8319	0.767	0.9859	0.2867	1.4026	0.7041
		-1.6456	-0.8554	0.3837	1.2045	0.4621	0.9973	1.2496
		-1.4192	-1.3519	-0.5768	1.8137	-1.1193	1.225	0.3305
		0	-0.8054	-0.3691	1.087	-0.4603	1.3695	0.0649
		-1.6816	-0.8263	-0.2604	0.0866	0.2202	0.8963	0.8681
		-1.0703	-0.6799	-0.6641	1.4081	-0.7525	0.734	0.7026
		-0.4485	-1.3732	-0.6107	1.1041	0.5894	2.0186	0.6378
		-1.2663	-0.4395	0	1.6955	-0.1706	1.0538	1.0212
		-1.546	-0.1509	-1.3536	1.0936	-0.5844	0.1365	-0.2892
		0	0.2457	-1.554	1.2153	-1.392	0.5257	0.4581
		0	0.7116	-1.3932	0.7818	-0.4995	0.9449	-0.0405
		-0.9671	0.7189	-0.1148	-0.336	0.083	1.1372	0.7249
			0.2184	0.1396	-0.9413	0.1639	0.3629	0.9928
			-0.1467	-0.3656	-0.2962	1.1839	0.5833	0.7465
			-0.4058	0.9842	-1.1672	0.3797	1.2794	1.5109
			-1.0325	-0.0646	1.144	0.9404		0.8112
			-0.9877	-0.2202	0	0.2537		1.0626
				0.8429	1.2901	-0.9368		1.1014
				1.0899	0.6963	-0.3028		0.4603
				1.3332		-0.8069		0.927
				-0.9318		0.8833		-0.2765
				-0.5943		0.5943
				-0.1793		0.894
				-0.6386		0.2655
				-0.8112		-0.151
				-1.1456		0.3391
				1.0098		0.2869
				0.0846		1.7997
				0.898		1.0229
				1.3926		-0.0509
				0.0098		0.8359
				0.4395		0.8112
				-1.0346		1.7115
				-1.5328
				0.1139
				0.0327
				1.3925
				-0.0176
				0.4661
				1.369
				0.4631
				0.7797
				3.0607
				1.508
				0.6658
				-1.6201
				-1.0297
				-0.9464
				1.0401
				-1.625
				-1.6246
				-1.4491
				-1.0294
				1.4349
				-0.1242
				0.5227
				-1.2233
				-0.4745
				-1.1007
				1.2444
				-1.1844
				-1.411
				-1.6343
				-1.2739
				-0.9382
				0.2771
				-1.2503
				1.1875
				-0.3425
				0.3017
				0.0854
				-1.0644
				-0.4745
				-1.5824
				-1.0397
				-1.4239
				-1.0754
				-0.7728
				-0.7723
				-1.0267
				0.0091
				1.3476
				-0.308
				0.7458
				0.1673
				-1.0413
				0.1363
				-0.0669
				-0.9098
				0.283
				1.1213
				-0.7832
				-1.6706
				0.0333
				-0.2153
				-0.9438
				-1.6066
				-0.0341
				0.4635
				0.1964
				-0.0961
				-1.6696
				0.2582
				-1.164
	Figure 4O	Neurosphere formation assay results
		Cell Seeding Number	n_wells	n_responders	Cell Line Name
		25	36	35	U3118_SCR
		12.5	36	34	U3118_SCR
		6.25	36	32	U3118_SCR
		3.125	36	24	U3118_SCR
		1.5625	36	22	U3118_SCR
		25	36	36	U3118_AMPD3_235
		12.5	36	31	U3118_AMPD3_235
		6.25	36	27	U3118_AMPD3_235
		3.125	36	21	U3118_AMPD3_235
		1.5625	36	19	U3118_AMPD3_235
		25	36	35	U3118_SRPX2_90
		12.5	36	32	U3118_SRPX2_90
		6.25	36	25	U3118_SRPX2_90
		3.125	36	12	U3118_SRPX2_90
		1.5625	36	11	U3118_SRPX2_90
		25	36	36	U3118_SRPX2_91
		12.5	36	34	U3118_SRPX2_91
		6.25	36	26	U3118_SRPX2_91
		3.125	36	16	U3118_SRPX2_91
		1.5625	36	12	U3118_SRPX2_91

## Sheet: Figure 4F
log2 Expression of SRPX2 in GBM vs Non-tumour tissue
Non-Tumour	GBM
3.5088	4.3982
3.8793	5.0322
3.9596	6.0464
3.9671	5.6724
3.6072	6.1356
3.7654	3.7121
3.6358	3.8315
3.649	3.6282
3.7443	5.3151
3.7861	4.9459
	6.5558
	5.2138
	4.1048
	5.374
	4.1645
	4.2947
	4.0205
	5.0047
	4.687
	4.1236
	4.8152
	5.1203
	4.8396
	3.7773
	3.8315
	5.6231
	4.5654
	4.7338
	4.6572
	3.821
	5.7112
	4.4436
	5.5489
	5.5216
	4.4208
	5.9841
	5.4084
	4.2546
	5.8252
	4.3725
	3.883
	5.067
	5.0833
	5.5986
	5.9271
	3.778
	5.076
	4.4581
	4.7646
	3.8637
	5.32
	5.9709
	6.3407
	3.9992
	3.6967
	5.3208
	3.759
	3.7298
	4.9861
	5.9387
	4.2058
	6.0151
	4.1198
	5.3304
	5.0346
	6.1781
	4.6286
	5.3593
	5.0746
	4.9002
	5.0843
	4.2671
	4.3531
	5.0977
	5.1654
	4.1289
	4.0638
	5.0533
	4.6136
	3.9726
	4.489
	4.3207
	4.3267
	4.179
	5.8887
	4.44
	5.3451
	4.4855
	3.8209
	5.533
	5.0552
	6.2916
	4.2676
	4.7111
	4.8917
	4.9443
	3.563
	6.4021
	4.6019
	4.3962
	5.7907
	4.6727
	5.9394
	4.7462
	5.613
	3.7517
	5.0236
	5.126
	4.0173
	5.4379
	5.3291
	5.4699
	4.7504
	5.389
	6.0328
	4.618
	3.99
	4.7387
	3.6072
	4.0125
	6.0078
	4.5417
	3.5601
	4.1967
	5.9563
	4.48
	4.3787
	4.1313
	5.0077
	6.2861
	4.4123
	4.5947
	5.3137
	4.3681
	5.7983
	5.1261
	5.0322
	4.3056
	6.0565
	6.5922
	6.0935
	5.5851
	3.4516
	5.5137
	5.9287
	6.8314
	6.0025
	5.9604
	5.0195
	5.3701
	4.8339
	4.0689
	4.7971
	4.0237
	4.455
	4.0538
	3.8131
	4.5282
	6.1022
	4.6672
	5.4949
	4.8981
	4.4512
	5.6902
	4.0912
	4.4146
	6.6314
	4.7371
	3.9523
	4.495
	4.9482
	5.5461
	4.5002
	5.0931
	4.9305
	5.0321
	4.5203
	3.9858
	5.0627
	4.2333
	4.7264
	5.3451
	5.0751
	5.8244
	5.8454
	5.5367
	4.4709
	5.7559
	5.1992
	5.3847
	6.0345
	4.691
	5.3536
	4.4582
	4.2752
	3.9286
	4.2278
	5.1829
	5.2888
	6.078
	4.8473
	5.4632
	4.7535
	6.1716
	3.5293
	5.7084
	4.3466
	4.6242
	5.9105
	4.2213
	6.5029
	4.986
	5.3733
	4.6526
	5.251
	4.0688
	5.7913
	5.4512
	5.7462
	4.638
	3.6257
	4.0102
	4.9566
	4.7118
	4.594
	5.7728
	3.9199
	4.6414
	6.0932
	4.5776
	4.795
	4.6771
	5.0708
	3.7381
	5.3011
	4.4892
	4.5763
	5.5648
	5.124
	4.6699
	4.0771
	4.3463
	5.5781
	4.8697
	4.3226
	4.1367
	4.8102
	4.5012
	3.3475
	5.8186
	5.7047
	6.3211
	6.9605
	5.615
	5.7663
	4.5516
	5.884
	4.657
	5.2919
	3.9919
	6.6136
	6.5391
	3.883
	5.6004
	4.6917
	5.1581
	4.5357
	3.7193
	6.513
	5.1915
	5.8409
	5.0002
	6.0132
	3.6867
	5.4033
	5.4664
	5.9603
	5.495
	6.0405
	5.7901
	6.1085
	5.322
	5.6513
	5.5976
	3.9599
	4.0911
	4.3529
	4.283
	5.9942
	4.9607
	5.3994
	4.8508
	5.1085
	5.3005
	3.5662
	5.8919
	4.652
	5.1382
	5.3194
	5.4519
	5.425
	4.4327
	5.1275
	4.7914
	4.7482
	3.9978
	5.3518
	5.534
	4.9924
	4.7537
	4.7624
	3.8338
	5.1988
	5.2782
	5.0855
	3.8593
	5.9399
	4.0027
	4.1972
	5.2714
	5.2764
	5.0678
	6.0099
	5.0255
	5.0456
	5.2632
	6.3667
	4.6867
	4.2305
	4.8123
	5.4042
	4.0817
	5.1214
	5.7616
	5.376
	6.0549
	4.8503
	5.8278
	4.0141
	4.7929
	4.7555
	5.8864
	4.9079
	3.8387
	4.4617
	4.3368
	3.5829
	5.2037
	5.1815
	5.2147
	3.8927
	4.9511
	4.2327
	4.1169
	5.4122
	5.7207
	5.0687
	4.9808
	4.0444
	3.9524
	4.4915
	4.1392
	5.0735
	4.1018
	3.3715
	4.3145
	5.3732
	4.4196
	4.2954
	4.8931
	5.1211
	5.1832
	5.0809
	4.7265
	4.1036
	5.2521
	5.2214
	4.4223
	4.6106
	5.3038
	4.6812
	4.2102
	4.9796
	4.3891
	5.2296
	6.5579
	4.8725
	4.8539
	4.1698
	5.288
	3.7325
	5.667
	5.5054
	5.366
	3.7882
	4.1837
	5.9399
	4.2199
	4.9501
	5.0217
	4.8395
	5.0697
	4.4577
	4.6646
	4.6183
	5.4227
	4.308
	6.3337
	4.7767
	4.6272
	5.3443
	4.9745
	5.9358
	3.9924
	5.273
	4.5431
	3.5553
	5.0879
	5.7904
	4.823
	3.5609
	5.179
	5.0831
	5.3656
	5.3901
	4.0484
	5.086
	5.7022
	4.877
	5.5046
	5.3567
	5.6719
	4.1512
	4.725
	4.3144
	3.8243
	4.8547
	5.2337
	5.0555
	5.1418
	5.0327
	4.9495
	6.0343
	5.2774
	5.7258
	5.1713
	4.6314
	4.2912
	3.8497
	4.7957
	5.5077
	6.2028
	5.214
	4.7349
	6.7019
	3.6961
	5.4224
	5.8597
	5.2403
	6.2166
	4.5248
	5.2232
	4.3479
	5.8218
	4.2574
	3.6932
	4.0035
	4.2464
	5.2276
	4.3125
	4.5643
	4.5987
	4.8127
	5.1488
	5.3672
	4.4659
	6.455
	4.758
	4.616
	4.2677
	5.4716
	4.1681
	4.6534
	4.758
	6.1698
	5.8677
	5.973
	5.3711
	5.9023
	5.2869
	5.2782
	5.3054
	5.185
	5.1425
	4.0335
	5.5394
	5.7469
	5.9554
	3.7297
	4.6858
	5.5105
	4.7384
	5.0587
	4.1291
	5.3642
	3.8679
	4.001
	5.3219
	5.0641
	5.2614
	6.0473
	4.263
	4.0982
	5.6988
	4.4043
	5.0554
	5.3256
	5.4997
	5.2591
	4.0772
	5.084
	4.2685
	4.8079
	5.3964
	5.3001
	4.6697
	4.6089
	4.6832

## Sheet: Figure 4H
	Survival analysis of patients with either SRPX2 High or SRPX2 Low tumours
	Time (Months)	SRPX2 High	SRPX2 Low
	4.7	1
	11.3	1
	23.2	1
	10.6	1
	20.6	1
	77.7	1
	20.1	1
	42.7	1
	2.8	1
	18.3	1
	15.1	1
	9.6	1
	19.7	1
	26.4	1
	25.1	0
	5.5	1
	20.8	1
	22.7	1
	12.6	1
	51.3	1
	8.8	1
	17	1
	11.7	1
	17.6	1
	23.2	1
	15.7	1
	16.9	1
	17.7	1
	14.5	1
	13.9	1
	14.2	1
	15.9	1
	9.9	1
	7.7	1
	7.3	1
	4.4	1
	25.1	1
	14.5	1
	3.4	1
	12.9	1
	20.3	1
	6.2	1
	20.4	1
	12.9	1
	26.7	1
	11.9	1
	10.3	1
	11.7	1
	2.3	1
	17.8	1
	10.1	1
	8.6	1
	13.9	1
	10.4	1
	56.9	1
	3.3	1
	4	1
	91	0
	20.2	1
	69.9	1
	73.8	0
	27.2	1
	15.4	1
	10.4	1
	39	1
	4.7	1
	5.6	1
	0.4	1
	7.7	1
	8.4	1
	7.4	1
	11.8	1
	0.5	1
	10.8	1
	0.3	1
	9.6	1
	12.6	1
	23.6	1
	26.4	1
	7.9	1
	0.9	1
	5.7	1
	7.2	0
	40.4	1
	16.6	1
	20.8	1
	23.9	1
	6.8	1
	4	1
	26.8	1
	15.3	1
	4.9	1
	17.6	1
	12.6	1
	6	0
	6	1
	0.4	0
	3.5	1
	4.5	1
	8.8	0
	9	0
	6.7	0
	2.7	1
	3.8	1
	6.2	0
	4.2	1
	8.4	1
	29.2	1
	1.3	1
	24.6	1
	31.1	1
	15.4	1
	14	1
	0.7	1
	12.6	1
	4.3	1
	7.7	1
	42.1	1
	19.6	1
	19.3	1
	4.8	1
	20.9	1
	16	1
	7.6	1
	34.9	1
	10.4	1
	7.6	1
	94.8	1
	0.1	1
	26.7	1
	3.6	1
	20.4	1
	28.4	1
	53.9	1
	43.2	1
	7.6	1
	9.7	1
	14.9	1
	14.9	1
	23.5	1
	27.8	1
	38.8	1
	20.6	1
	127.6	1
	7.6	1
	21.7	1
	16	1
	12.2	1
	15.8	1
	14.5	1
	15.7	1
	25.7	1
	14.7	1
	26.9	1
	15.2	1
	10.9	1
	34.9	1
	3.2	1
	2	1
	15.1	1
	1	1
	6.2	1
	23.1	1
	2.2	1
	11.2	1
	5.4	1
	26.3	1
	2	1
	28.9	1
	15.9	1
	1.1	1
	7.1	1
	12.4	1
	1	1
	2	1
	7.2	0
	17.5	1
	8	0
	0.4	1
	19.1	0
	17.6	1
	29	1
	4.6	1
	9.1	1
	21.2	1
	11.8	0
	0.7	1
	3.4	0
	10.8	1
	4.6	1
	3.6	1
	7.2	0
	12.7	1
	5.1	1
	4.9	1
	7.5	0
	7	1
	6.6	1
	18.9	1
	12.1	1
	1.8	1
	14.1	1
	10	0
	13.9	1
	7.1	0
	9.4	1
	9.4	0
	14.9	0
	8.9	1
	19	1
	5.1	1
	16.6	1
	9.9	1
	11.5	1
	24.8	1
	18.1	1
	10.4	0
	7.6	1
	2.9	1
	14.4	1
	15.8	1
	8.3	0
	7.6	0
	8.5	0
	1.6	1
	0.1	0
	4.7	0
	0.7	0
	4.8	0
	7.3	0
	2.5	0
	5.2	1
	22.7	0
	5.4	1
	0.1	0
	4.7	1
	12.7	1
	14.9	1
	16.9	1
	12.2	1
	20.8	1
	15	1
	15.9	1
	7.4	1
	8.8	1
	25.2	1
	21.1	0
	20.3	1
	19.9	0
	19.2	1
	13.3	1
	1	1
	4.4	1
	11.8	1
	0.2	1
	4.5	1
	3.1	1
	3.6	1
	9.2	1
	47.9	1
	36.9	1
	2.7	1
	17.1	1
	11.8		1
	35.4		1
	20.7		1
	82.6		1
	87.1		1
	53.1		1
	24.6		1
	12.2		1
	90.6		1
	14.1		1
	10.7		1
	10.5		1
	6.9		1
	14.7		1
	3.2		1
	12.6		1
	6.5		1
	19.9		1
	8.3		1
	6		1
	28.7		0
	10.2		1
	27.2		1
	89.7		1
	57.8		0
	3.5		1
	27		1
	65		1
	92.7		0
	100		1
	49		1
	16.5		1
	10.8		1
	4		1
	12.2		1
	10.6		1
	15.9		1
	25.7		1
	10.6		1
	12.4		1
	10.6		1
	47.1		1
	0.7		1
	11.3		1
	9.3		1
	16.2		1
	16.8		1
	15.3		0
	15.4		0
	47.6		1
	6.9		1
	4		1
	22.7		1
	33.7		1
	25.4		1
	14.3		1
	24.2		1
	0.2		1
	2.2		1
	20.1		1
	12.3		1
	5.8		1
	3.2		1
	10.8		1
	11.8		1
	3.4		1
	5.8		1
	11.4		1
	19.7		1
	13.1		1
	4.5		1
	3.2		1
	4.2		1
	88.1		1
	3.6		1
	44.6		1
	7.4		1
	15		1
	24.2		1
	0.7		1
	19.8		1
	13.6		1
	13.3		1
	20.4		1
	48.7		1
	9		1
	72.4		1
	4.7		1
	3.2		1
	35.1		1
	5.8		1
	5.8		1
	9.8		1
	2.1		1
	14.2		1
	46.9		1
	2.7		1
	2.7		1
	43.5		0
	46.2		0
	26.8		1
	11.8		1
	13.6		1
	33.9		0
	1.1		1
	12.5		1
	30.6		0
	16.6		1
	4.4		1
	31.5		0
	11.7		1
	8.3		1
	8.6		0
	5.1		0
	4.6		0
	7.8		0
	5.4		1
	1.5		1
	22.7		1
	37.8		1
	115.9		1
	1.7		1
	25.7		1
	12.2		1
	9.8		1
	65.3		1
	8.4		1
	17.9		1
	37.6		1
	22.3		1
	3.4		1
	4.4		1
	12.2		1
	14.9		1
	2.7		1
	18		1
	15.3		1
	11.1		1
	58.7		1
	10.8		1
	7.3		1
	18.4		1
	14.7		1
	13		1
	26		1
	91.8		1
	24.8		1
	18.5		1
	10.6		1
	8.9		1
	5.8		1
	33.2		1
	9.1		1
	4		1
	4.1		1
	22.2		1
	6.8		1
	59.8		1
	44		1
	12.7		1
	14.5		1
	14.9		1
	13.8		1
	3.2		1
	1.4		1
	16.5		1
	19.3		1
	3.8		1
	32		1
	23.1		1
	1.1		1
	30.2		1
	0.9		1
	41		0
	6.7		1
	17.8		1
	17.9		1
	7.6		1
	5.9		1
	3.8		0
	3.4		0
	13.8		1
	50.5		1
	53.2		0
	13.3		1
	3.9		1
	26.1		0
	16.4		1
	4.3		0
	10.3		1
	14		1
	14		1
	6.4		0
	21.9		1
	8.6		0
	14.3		1
	9.1		1
	6		0
	12.9		1
	25.4		1
	3.7		1
	3.2		1
	0.1		0
	9.7		0
	1.1		1
	0.2		1
	4.1		1
	24.2		1
	4.5		0
	17.2		1
	8		1
	22.5		1
	16.8		1
	15		1
	9.7		0
	31.3		0
	5.5		0
	1.6		0
	24.2		1
	40.5		1
	21.3		1
	30.1		1
	14		1
	16.1		1
	11.3		0
	0.2		0
	2.5		1
	9.2		0
	1.2		0
	2.8		0
	6.7		0
	5.3		0
	14.9		1
	11.3		1
	17.9		1
	31.3		0
	23.4		1
	11		1
	13.6		0
	10.5		0
	15.4		1
	21.1		1
	0.5		1
	15.8		1
	19.5		1
	1.2		1
	22.8		0
	3.7		1
	12.6		1
	10.8		1
	0.8		1
	8.9		0
	9.5		1
	15.1		1
	4.8		1
	17.6		1
	2.5		1
	16.7		1
	3.3		1
	8.3		1
	1.6		1
	26.3		0
