# Supplementary material for: Global hypo-methylation in a proportion of glioblastoma enriched for an astrocytic signature is associated with increased invasion and altered immune landscape
Source: eLife journal article supplement (doi:10.7554/elife.77335), 2022-11-02
Supplement: fig4-figsupp1-data1 [file Figure_4_figure_supplement_1_D_H_I.xlsx]

## Sheet: Figure 4-figure supplement 1
	Figure 4-figure supplement 1 D	Invasive index scores of xenografts from BE-GICs and Other GICs
			BE-GICs				Other GICs
		GIC Line No.	17	19	30	31	18	24	26	49	50	52	54	61
		% Vim+ Area	50.27	34.01	26.42	17.1	65.01	58.11	70.74	61.09	52.38	15.06	79.36	82.09
	Figure 4-figure supplement 1 H	Cell counts of GICs transduced with shRNAs from D0 to D5, each replicate is an average of 3 technical replicates
		Day	U3118 shSCR			U3118 shSRPX2_90			U3118 shSRPX2_91			GIC19 shSCR_M1+4			GIC19 shSRPX2_90 M1+4			GIC19 shSRPX2_91 M1+4
		0	10000	10000	10000	10000	10000	10000	10000	10000	10000	10000	10000	10000	10000	10000	10000	10000	10000	10000
		2	16000	19766.7	21900	16333.3	18933.3	19333.3	19333.3	16600	22666.7	13690	19933.3		15033.3	20333.3	12700	24233.3	19733.3	9593.33
		3	23066.7	27166.7	31100	21500	25200	24433.3	27566.7	30900	37133.3	22500	27366.7		15233.3	32833.3	24433.3	25433.3	39500	23066.7
		4	39500	44966.7	45366.7	41633.3	50633.3	46933.3	36766.7	40666.7	56866.7	40466.7			44166.7	33800		52600	35366.7
		5	64500	81333.3	79366.7	53366.7	80766.7	71566.7	58266.7	80366.7	106067	40266.7	54133.3		38100	77433.3	65300	53366.7	75866.7	47933.3
	Figure 4-figure supplement 1 I	Neurosphere formation assay results
		Cell Seeding Number	n_wells	n_responders	Cell Line Name
		25	36	36	GIC19_SCR
		12.5	36	35	GIC19_SCR
		6.25	36	36	GIC19_SCR
		3.125	36	31	GIC19_SCR
		1.5625	36	31	GIC19_SCR
		25	36	35	GIC19_SRPX2_90_M1+4
		12.5	36	36	GIC19_SRPX2_90_M1+4
		6.25	36	35	GIC19_SRPX2_90_M1+4
		3.125	36	34	GIC19_SRPX2_90_M1+4
		1.5625	36	35	GIC19_SRPX2_90_M1+4
		25	36	35	GIC19_SRPX2_91_M1+4
		12.5	36	36	GIC19_SRPX2_91_M1+4
		6.25	36	35	GIC19_SRPX2_91_M1+4
		3.125	36	28	GIC19_SRPX2_91_M1+4
		1.5625	36	32	GIC19_SRPX2_91_M1+4
