# Supplementary material for: Global hypo-methylation in a proportion of glioblastoma enriched for an astrocytic signature is associated with increased invasion and altered immune landscape
Source: eLife journal article supplement (doi:10.7554/elife.77335), 2022-11-02
Supplement: fig4-figsupp1-data1 [file Figure_4_figure_supplement_1_E_Annotation.xlsx]

## Sheet: Gel1 Labelled
Gel 1, Image 1: Tubulin								Gel 1 Layout
								Lane (Left to right)	Sample Name
								1	GIC19_shSCR_1
								2	GIC19_shSCR_2
								3	GIC19_shSCR_3	Displayed in Figure 4-figure supplement 1 E
								4	GIC19_shSRPX2_90_1	Displayed in Figure 4-figure supplement 1 E
								5	GIC19_shSRPX2_90_2
								6	GIC19_shSRPX2_90_3
								7	GIC19_shSRPX2_91_1	Displayed in Figure 4-figure supplement 1 E
								8	GIC19_shSRPX2_91_2
								9	GIC19_shSRPX2_91_3
								10	U3118_shSRPX2_91 3
Gel 1, Image 2: SRPX2 (smallest/last band is the band of interest)
Gel 1, Image 3: GAPDH (not displayed in figure)
