# Supplementary material for: Global hypo-methylation in a proportion of glioblastoma enriched for an astrocytic signature is associated with increased invasion and altered immune landscape
Source: eLife journal article supplement (doi:10.7554/elife.77335), 2022-11-02
Supplement: fig5-data1 [file Figure_5_A_B_G-O.xlsx]

## Sheet: Figure 5
	Figure 5A	Expression (TPM) of RARRES2 in Bias & Enriched or Non-Bias & Non-Enriched GICs from this study
		Bias & Enriched	Non-Bias & Non-Enriched
		12.0086	0.494098
		12.033	0.978745
		17.4905	4.25656
		22.1249	1.53543
		8.63789	5.34494
		7.14608	1.55183
		71.8381	0.38417
		50.9562	0.396881
			0.482329
			4.80993
			0.882634
			1.2445
	Figure 5B	Expression (probe intensity) of RARRES2 in Bias & Enriched or Non-Bias & Non-Enriched HGCC GICs
		Bias & Enriched	Non-Bias & Non-Enriched
		7.35652	6.62295
		6.77799	6.86651
		7.37408	6.81992
		8.39943	6.70613
		6.86224	6.9433
		6.81837	6.64481
		6.70314
		6.95058
		6.71298
		6.95796
		6.90014
		6.99915
		7.20512

## Sheet: Figure 5G-O
	ACS/OPC pseudobulk score vs % cells from the cluster per patient		% ACS-like cancer cells vs % cells from the cluster per patient		% AC-like (Neftel et al.) cancer cells vs % cells from the cluster per patient		% MES-like (Neftel et al.) cancer cells vs % cells from the cluster per patient		% NPC-like (Neftel et al.) cancer cells vs % cells from the cluster per patient		% OPC-like (Neftel et al.) cancer cells vs % cells from the cluster per patient
Cluster	p.value	rho	p.value	rho	p.value_perc	rho_perc	p.value	rho	p.value	rho	p.value	rho
Cancer cells	0.0318233	-0.582418	0.0114755	-0.665934	0.097234	-0.463736	0.349143	-0.27033	0.115791	0.441758	0.0419772	0.556044
Myeloid cells	0.0275084	0.595604	0.00352663	0.740659	0.0137114	0.652747	0.573323	0.164835	0.0666902	-0.507692	0.0521596	-0.534066
- TAM	0.0318233	0.582418	0.00480502	0.723077	0.0145264	0.648352	0.681768	0.120879	0.100762	-0.459341	0.0615507	-0.516484
- SEPP1 hi mo-TAM	0.00894266	0.683516	0.0521596	0.534066	0.0666902	0.507692	0.626627	0.142857	0.295027	-0.301099	0.022467	-0.613187
- Hypoxic mo-TAM	0.273494	0.314286	0.738503	0.0989011	0.391062	-0.248352	0.0640824	0.512088	0.879545	0.0461538	0.170248	-0.389011
- Proliferating TAM	0.259694	0.323077	0.0937958	0.468132	0.214891	0.353846	0.715634	0.107692	0.512092	-0.191209	0.22096	-0.349451
- MGH105 TAM	1	1	1	1	1	-1	1	1	1	-1	1	-1
- HSP TAM	0.732775	0.111888	0.63514	0.153846	0.0838846	0.524476	0.342483	-0.300699	0.749479	-0.104895	0.308312	-0.321678
- mg-TAM	0.273494	0.314286	0.0333702	0.578022	0.0181656	0.630769	0.879545	-0.0461538	0.132342	-0.424176	0.302427	-0.296703
- Monocytes	0.0554813	0.573427	0.0323947	0.629371	0.903739	0.041958	0.0627487	0.559441	0.378709	-0.27972	0.0520862	-0.58042
- Mast cells	1	0.5	1	0.5	1	0.5	1	0.5	1	-0.5	1	-0.5
- cDC1	0.658333	0.257143	0.658333	0.257143	0.355556	-0.485714	0.136111	0.714286	0.497222	-0.371429	1	-0.0285714
- cDC2	0.0458333	0.738095	0.0575893	0.714286	0.934871	-0.047619	0.0217758	0.809524	0.11498	-0.619048	0.11498	-0.619048
- Proliferating cDC2	0.95	-0.1	0.783333	-0.2	0.683333	-0.3	0.783333	-0.2	0.783333	0.2	0.95	0.1
Lymphocytes	0.182196	0.395604	0.279927	0.324176	0.163386	0.412088	0.447772	0.230769	0.175774	-0.401099	0.124701	-0.450549
Naive T cells	0.559908	-0.212121	0.94571	-0.030303	0.838004	-0.0787879	0.387055	-0.309091	0.3128	0.357576	0.891639	0.0545455
- CD4 T cells	0.236732	0.370629	0.200973	0.398601	0.227443	0.377622	0.378709	0.27972	0.161446	-0.433566	0.0793029	-0.531469
- Treg	0.891639	0.0545455	0.864754	0.0666667	0.513898	0.236364	0.94571	0.030303	0.972841	-0.0181818	0.758833	-0.115152
- CD8 T GZMK cells	0.732887	0.127273	0.732887	0.127273	0.707204	0.139394	0.94571	0.030303	0.758833	-0.115152	0.732887	-0.127273
- CD8 T proliferative cells	0.00607363	0.85	0.0172233	0.783333	0.147525	0.533333	0.358581	0.35	0.132777	-0.55	0.0311232	-0.733333
- IFN T cells	0.0833333	0.9	0.0166667	1	0.45	0.5	0.133333	0.8	0.35	-0.6	0.0166667	-1
- NKT cells	0.551709	0.233333	0.551709	0.233333	0.809981	0.1	0.613404	0.2	0.880093	-0.0666667	0.436624	-0.3
- NK FGFBP2 cells	0.802778	0.142857	0.802778	0.142857	0.175	-0.657143	0.713889	0.2	0.297222	0.542857	0.713889	0.2
- NK KRT81 KLRC1 cells	0.64364	0.183333	0.64364	0.183333	0.948391	0.0333333	0.385323	0.333333	0.33626	-0.366667	0.41008	-0.316667
- B cells	0.683333	-0.3	0.95	0.1	0.133333	0.8	0.683333	-0.3	0.516667	-0.4	0.683333	-0.3
Oligodendrocytes	0.903739	0.041958	0.921184	0.034965	0.470906	0.230769	0.732775	-0.111888	0.86898	-0.0559441	0.86898	-0.0559441
Endothelial cells	0.879545	-0.0461538	0.855675	0.0549451	0.227139	0.345055	0.867596	0.0505495	0.214891	-0.353846	0.903515	-0.0373626
