# Supplementary material for: Global hypo-methylation in a proportion of glioblastoma enriched for an astrocytic signature is associated with increased invasion and altered immune landscape
Source: eLife journal article supplement (doi:10.7554/elife.77335), 2022-11-02
Supplement: fig5-figsupp1-data1 [file Figure_5_figure_supplement_1_A-I.xlsx]

## Sheet: Figure 5-figure supplement 1
	Figure 5-figure supplement 1 A	log2 mRNA expression of RARRES2 in non-tumour vs GBM (Non G-CIMP), data from gliovis			Figure 5-figure supplement 1 B	Survival of patients classified as RARRES2 High/Low expression				Figure 5-figure supplement 1 C	Percentage CD68+ cells in FFPE tissue of BE-GICs and nBE-GICs
		Non-Tumour	GBM (Non G-CIMP)			Survival Time (Months)	RARRES2 High	RARRES2 Low			BE-GICs	nBE-GICs
		7.7464	10.0547			11.8	1				12.57	3.26
		7.6972	9.9334			4.7	1				9	6.89
		6.5805	11.1695			11.3	1				27.23	12.12
		7.1085	5.542			10.6	1				21.89	11.11
		7.7646	9.8157			35.4	1					7.3
		7.2765	5.2411			20.6	1
		6.7134	7.9708			20.1	1
		7.2295	5.975			42.7	1
		6.991	5.8695			12.2	1
		7.0518	8.5162			90.6	1
			4.0965			2.8	1
			11.6922			14.1	1
			10.7321			10.5	1
			9.664			18.3	1
			11.1667			6.9	1
			4.198			15.1	1
			8.3122			12.6	1
			10.0313			6.5	1
			9.6932			19.9	1
			4.7877			9.6	1
			5.4192			6	1
			8.6839			19.7	1
			9.5528			20.8	1
			8.3864			27.2	1
			10.0044			22.7	1
			8.3458			51.3	1
			9.3052			3.5	1
			8.3355			27	1
			6.6461			11.7	1
			7.8155			17.6	1
			7.3938			23.2	1
			7.2236			92.7	1
			7.7914			17.7	1
			8.3796			13.9	1
			9.2034			12.2	1
			8.2501			9.9	1
			7.8783			7.7	1
			6.8362			10.6	1
			7.3679			7.3	1
			7.9524			15.9	1
			8.2993			25.1	1
			8.0409			10.6	1
			9.5443			9.3	1
			8.2018			3.4	1
			8.4809			16.8	1
			6.4765			15.4	1
			7.1955			20.3	1
			5.3379			6.2	1
			9.1508			20.4	1
			6.0201			14.3	1
			7.0625			24.2	1
			5.4291			11.9	1
			9.8762			0.2	1
			7.7267			10.3	1
			7.6276			2.3	1
			9.3129			10.1	1
			9.766			8.6	1
			8.7463			12.3	1
			8.6407			5.8	1
			8.5789			3.2	1
			10.9347			3.4	1
			7.5467			19.7	1
			7.0824			3.3	1
			9.4811			4.5	1
			6.6957			3.2	1
			7.5721			91	1
			8.1413			4.2	1
			7.3123			20.2	1
			5.1778			27.2	1
			8.7641			44.6	1
			7.5753			15.4	1
			10.1957			10.4	1
			8.094			7.4	1
			7.8131			5.6	1
			8.4191			0.4	1
			7.9473			7.7	1
			7.8573			7.4	1
			8.1268			0.5	1
			6.2986			24.2	1
			6.9325			13.6	1
			6.5008			20.4	1
			7.6017			48.7	1
			7.8265			72.4	1
			9.0956			9.6	1
			5.5069			12.6	1
			8.4344			5.8	1
			10.0129			2.1	1
			8.4621			26.4	1
			9.1774			7.9	1
			7.2341			0.9	1
			7.832			43.5	1
			7.9662			46.2	1
			7.551			7.2	1
			9.3036			16.6	1
			9.9032			20.8	1
			8.3558			26.8	1
			6.7908			23.9	1
			7.7881			6.8	1
			9.356			13.6	1
			8.3209			12.5	1
			6.1275			4.9	1
			9.3732			17.6	1
			7.4491			12.6	1
			7.0787			6	1
			7.0297			4.4	1
			9.7895			11.7	1
			9.2188			3.5	1
			7.2115			4.5	1
			8.6778			8.8	1
			8.2137			9	1
			7.7629			6.7	1
			9.2906			2.7	1
			8.3497			6.2	1
			7.9884			4.6	1
			5.7442			5.4	1
			7.0979			1.5	1
			7.6013			22.7	1
			8.5922			4.2	1
			8.4674			8.4	1
			7.8643			9.8	1
			8.6653			8.4	1
			7.6903			17.9	1
			7.3584			22.3	1
			10.1325			3.4	1
			8.4494			15.4	1
			9.5077			14.9	1
			10.1654			18	1
			5.3161			15.3	1
			8.2158			14	1
			7.3657			0.7	1
			9.7657			42.1	1
			6.3844			19.3	1
			9.0868			10.8	1
			7.82			7.3	1
			9.1583			18.4	1
			5.8809			14.7	1
			7.9783			13	1
			8.39			34.9	1
			6.2297			10.4	1
			5.1581			7.6	1
			6.7895			94.8	1
			8.3854			0.1	1
			5.5496			26	1
			8.8274			3.6	1
			6.6905			28.4	1
			5.7944			53.9	1
			8.4098			43.2	1
			7.69			7.6	1
			8.4793			9.7	1
			6.6134			20.6	1
			8.6422			127.6	1
			7.1845			5.8	1
			6.7042			7.6	1
			7.9187			21.7	1
			7.7718			16	1
			9.7786			9.1	1
			5.6852			4	1
			7.29			25.7	1
			8.7844			14.7	1
			8.6112			6.8	1
			9.063			59.8	1
			5.7309			44	1
			8.5148			12.7	1
			6.6629			14.9	1
			9.8596			3.2	1
			8.5534			15.1	1
			9.3723			6.2	1
			8.3409			11.2	1
			9.6183			3.2	1
			5.9361			1.4	1
			7.5391			5.4	1
			4.476			2	1
			7.1258			28.9	1
			9.5522			15.9	1
			6.4312			19.3	1
			8.3391			23.1	1
			9.5629			1.1	1
			8.031			0.9	1
			9.2719			17.9	1
			4.7875			5.9	1
			8.2432			7.2	1
			4.633			17.5	1
			7.222			8	1
			10.6738			0.4	1
			4.7191			3.8	1
			8.6323			13.8	1
			9.3235			19.1	1
			6.7881			4.3	1
			8.1246			9.1	1
			8.9704			21.9	1
			7.8805			8.6	1
			6.879			0.7	1
			9.4069			10.8	1
			8.7607			4.6	1
			6.7976			3.6	1
			7.8734			7.2	1
			10.0231			12.7	1
			8.9179			3.2	1
			9.6769			5.1	1
			8.8174			4.9	1
			7.4974			1.1	1
			8.6046			7.5	1
			6.4058			4.1	1
			9.5061			6.6	1
			6.5802			17.2	1
			5.3987			15	1
			9.2692			10	1
			7.3601			13.9	1
			8.2722			9.4	1
			10.0333			5.5	1
			7.775			1.6	1
			7.1138			16.6	1
			7.5232			9.9	1
			9.6162			40.5	1
			7.9231			11.5	1
			9.6763			24.8	1
			5.8115			16.1	1
			6.4753			7.6	1
			8.3296			2.9	1
			11.1309			15.8	1
			10.068			11.3	1
			9.5659			0.2	1
			9.3441			8.3	1
			6.9942			7.6	1
			6.4449			8.5	1
			7.0058			0.7	1
			9.4655			4.8	1
			4.856			7.3	1
			4.5511			11.3	1
			8.4558			17.9	1
			8.1442			2.5	1
			5.9505			31.3	1
			6.9319			23.4	1
			6.5561			11	1
			9.4338			5.2	1
			5.5564			15.4	1
			8.8823			19.5	1
			8.3815			1.2	1
			8.7512			14.9	1
			8.4427			16.9	1
			8.3942			20.8	1
			8.2702			15.9	1
			9.3561			7.4	1
			8.7346			8.8	1
			7.4654			22.8	1
			8.6894			3.7	1
			7.3502			12.6	1
			7.9563			19.2	1
			8.128			0.8	1
			9.3038			8.9	1
			9.9282			9.5	1
			10.1761			1	1
			7.1415			11.8	1
			7.3021			15.1	1
			6.2634			4.5	1
			5.557			17.6	1
			7.0232			3.1	1
			7.4645			9.2	1
			6.7115			2.5	1
			7.7523			2.7	1
			8.5861			17.1	1
			8.5589			8.3	1
			8.2944			23.2		1
			9.1101			20.7		1
			5.979			82.6		1
			8.9671			87.1		1
			8.2293			77.7		1
			6.1426			53.1		1
			7.1173			24.6		1
			8.2404			10.7		1
			7.5275			14.7		1
			7.8619			3.2		1
			4.7861			8.3		1
			6.5732			26.4		1
			7.3768			28.7		1
			7.9044			25.1		1
			9.5826			5.5		1
			8.8524			10.2		1
			9.1189			89.7		1
			9.9148			12.6		1
			7.4973			8.8		1
			5.4394			57.8		1
			6.4984			17		1
			9.2022			65		1
			6.857			100		1
			7.4246			15.7		1
			8.4806			49		1
			8.8878			16.5		1
			6.9905			16.9		1
			8.3786			10.8		1
			7.2463			14.5		1
			8.7964			4		1
			6.2474			14.2		1
			7.297			15.9		1
			9.2814			25.7		1
			7.6805			4.4		1
			9.2305			10.6		1
			9.0414			12.4		1
			10.0257			14.5		1
			4.454			47.1		1
			5.9066			0.7		1
			8.1984			11.3		1
			8.4687			16.2		1
			8.5692			12.9		1
			10.1054			15.3		1
			7.5494			47.6		1
			6.7259			6.9		1
			7.0596			4		1
			8.2617			22.7		1
			6.2091			33.7		1
			8.5791			12.9		1
			7.0389			25.4		1
			7.8605			26.7		1
			5.7505			2.2		1
			7.3533			11.7		1
			6.5913			20.1		1
			9.7041			17.8		1
			6.5222			13.9		1
			8.1579			10.4		1
			9.3624			10.8		1
			8.9388			11.8		1
			9.0462			56.9		1
			8.6511			5.8		1
			8.3914			11.4		1
			8.1635			13.1		1
			5.3258			4		1
			8.2129			88.1		1
			6.6423			3.6		1
			5.277			69.9		1
			6.5871			73.8		1
			7.6874			39		1
			9.653			4.7		1
			7.5829			8.4		1
			6.0943			11.8		1
			6.7794			15		1
			7.6864			0.7		1
			7.7038			19.8		1
			8.1729			13.3		1
			5.6667			10.8		1
			6.524			9		1
			7.5			0.3		1
			9.0044			4.7		1
			9.4846			3.2		1
			8.9478			35.1		1
			5.7119			5.8		1
			6.8777			9.8		1
			9.2665			23.6		1
			5.6661			14.2		1
			6.9938			46.9		1
			7.1509			2.7		1
			8.7628			2.7		1
			6.4898			5.7		1
			8.9404			40.4		1
			8.1947			4		1
			9.8639			26.8		1
			8.1299			11.8		1
			8.7418			15.3		1
			4.6426			33.9		1
			6.3042			1.1		1
			8.0669			30.6		1
			8.0265			16.6		1
			9.3268			6		1
			6.2698			0.4		1
			8.0204			31.5		1
			7.2402			8.3		1
			7.0868			8.6		1
			8.9446			5.1		1
			7.8784			3.8		1
			6.7826			7.8		1
			7.3008			37.8		1
			6.691			115.9		1
			7.1776			1.7		1
			7.7906			25.7		1
			6.6788			12.2		1
			7.0835			29.2		1
			11.7727			65.3		1
			8.9787			1.3		1
			8.4816			24.6		1
			7.5635			31.1		1
			7.587			37.6		1
			7.3007			4.4		1
			11.1715			12.2		1
			8.2118			2.7		1
			5.6343			12.6		1
			4.3903			4.3		1
			9.6747			7.7		1
			7.1292			11.1		1
			7.9358			19.6		1
			10.0831			58.7		1
			7.5268			4.8		1
			9.737			20.9		1
			4.4393			16		1
			5.5677			7.6		1
			5.7279			26.7		1
			8.2805			20.4		1
			8.3926			14.9		1
			7.8381			14.9		1
			8.8329			91.8		1
			9.3401			24.8		1
			10.5329			18.5		1
			7.6693			10.6		1
			8.7552			23.5		1
			9.2162			27.8		1
			10.0588			38.8		1
			6.5487			8.9		1
			6.7214			33.2		1
			9.2621			12.2		1
			8.4505			15.8		1
			8.6603			14.5		1
			7.3191			4.1		1
			7.4875			22.2		1
			5.4758			15.7		1
			7.7292			26.9		1
			7.2086			15.2		1
			8.0352			10.9		1
			5.9097			34.9		1
			9.3189			14.5		1
			6.7734			2		1
			8.484			1		1
			6.2054			23.1		1
			6.2237			2.2		1
			10.3053			13.8		1
			9.6182			16.5		1
			9.1837			26.3		1
			10.1827			1.1		1
			7.9895			3.8		1
			9.4492			32		1
			7.5352			7.1		1
			7.9569			30.2		1
			7.3265			41		1
			6.7265			6.7		1
			6.1683			12.4		1
			8.7312			1		1
			4.9379			2		1
			6.6155			17.8		1
			7.2499			7.6		1
			4.4487			3.4		1
			8.1828			50.5		1
			8.2422			53.2		1
			7.5758			13.3		1
			7.6259			3.9		1
			8.8805			17.6		1
			9.7903			26.1		1
			6.8319			16.4		1
			8.7775			29		1
			5.8485			4.6		1
			7.9004			10.3		1
			8.7737			14		1
			9.5818			21.2		1
			8.3584			14		1
			5.1825			6.4		1
			5.7406			11.8		1
			8.775			14.3		1
			10.1183			3.4		1
			6.9897			9.1		1
			7.1183			6		1
			9.0073			12.9		1
			8.8805			25.4		1
			5.9743			3.7		1
			8.424			0.1		1
			9.9323			9.7		1
			9.5342			0.2		1
			7.5443			24.2		1
			8.0197			7		1
			7.0795			4.5		1
			8.5263			8		1
			4.6612			18.9		1
			8.9567			12.1		1
			8.0846			1.8		1
			8.7524			22.5		1
			6.8851			14.1		1
			10.7101			16.8		1
			5.0173			9.7		1
			8.0962			31.3		1
			5.5572			7.1		1
			7.3439			9.4		1
			7.6061			14.9		1
			8.3191			8.9		1
			9.706			19		1
			8.973			5.1		1
			5.1332			24.2		1
			7.5965			21.3		1
						30.1		1
						14		1
						18.1		1
						10.4		1
						14.4		1
						2.5		1
						9.2		1
						1.2		1
						1.6		1
						2.8		1
						0.1		1
						4.7		1
						6.7		1
						5.3		1
						14.9		1
						13.6		1
						22.7		1
						10.5		1
						5.4		1
						21.1		1
						0.5		1
						0.1		1
						15.8		1
						4.7		1
						12.7		1
						12.2		1
						15		1
						25.2		1
						21.1		1
						20.3		1
						19.9		1
						10.8		1
						13.3		1
						4.4		1
						0.2		1
						4.8		1
						3.6		1
						47.9		1
						36.9		1
						16.7		1
						3.3		1
						1.6		1
						26.3		1

## Sheet: Figure 5-figure supplement 1D-I
	ACS/OPC pseudobulk score vs % cells from the cluster per patient		% ACS-like cancer cells vs % cells from the cluster per patient		% AC-like (Neftel et al.) cancer cells vs % cells from the cluster per patient		% MES-like (Neftel et al.) cancer cells vs % cells from the cluster per patient		% NPC-like (Neftel et al.) cancer cells vs % cells from the cluster per patient		% OPC-like (Neftel et al.) cancer cells vs % cells from the cluster per patient
Cluster	p.value	rho	p.value	rho	p.value_perc	rho_perc	p.value	rho	p.value	rho	p.value	rho
Cancer cells	0.0318233	-0.582418	0.0114755	-0.665934	0.097234	-0.463736	0.349143	-0.27033	0.115791	0.441758	0.0419772	0.556044
Myeloid cells	0.0275084	0.595604	0.00352663	0.740659	0.0137114	0.652747	0.573323	0.164835	0.0666902	-0.507692	0.0521596	-0.534066
- TAM	0.0318233	0.582418	0.00480502	0.723077	0.0145264	0.648352	0.681768	0.120879	0.100762	-0.459341	0.0615507	-0.516484
- SEPP1 hi mo-TAM	0.00894266	0.683516	0.0521596	0.534066	0.0666902	0.507692	0.626627	0.142857	0.295027	-0.301099	0.022467	-0.613187
- Hypoxic mo-TAM	0.273494	0.314286	0.738503	0.0989011	0.391062	-0.248352	0.0640824	0.512088	0.879545	0.0461538	0.170248	-0.389011
- Proliferating TAM	0.259694	0.323077	0.0937958	0.468132	0.214891	0.353846	0.715634	0.107692	0.512092	-0.191209	0.22096	-0.349451
- MGH105 TAM	1	1	1	1	1	-1	1	1	1	-1	1	-1
- HSP TAM	0.732775	0.111888	0.63514	0.153846	0.0838846	0.524476	0.342483	-0.300699	0.749479	-0.104895	0.308312	-0.321678
- mg-TAM	0.273494	0.314286	0.0333702	0.578022	0.0181656	0.630769	0.879545	-0.0461538	0.132342	-0.424176	0.302427	-0.296703
- Monocytes	0.0554813	0.573427	0.0323947	0.629371	0.903739	0.041958	0.0627487	0.559441	0.378709	-0.27972	0.0520862	-0.58042
- Mast cells	1	0.5	1	0.5	1	0.5	1	0.5	1	-0.5	1	-0.5
- cDC1	0.658333	0.257143	0.658333	0.257143	0.355556	-0.485714	0.136111	0.714286	0.497222	-0.371429	1	-0.0285714
- cDC2	0.0458333	0.738095	0.0575893	0.714286	0.934871	-0.047619	0.0217758	0.809524	0.11498	-0.619048	0.11498	-0.619048
- Proliferating cDC2	0.95	-0.1	0.783333	-0.2	0.683333	-0.3	0.783333	-0.2	0.783333	0.2	0.95	0.1
Lymphocytes	0.182196	0.395604	0.279927	0.324176	0.163386	0.412088	0.447772	0.230769	0.175774	-0.401099	0.124701	-0.450549
Naive T cells	0.559908	-0.212121	0.94571	-0.030303	0.838004	-0.0787879	0.387055	-0.309091	0.3128	0.357576	0.891639	0.0545455
- CD4 T cells	0.236732	0.370629	0.200973	0.398601	0.227443	0.377622	0.378709	0.27972	0.161446	-0.433566	0.0793029	-0.531469
- Treg	0.891639	0.0545455	0.864754	0.0666667	0.513898	0.236364	0.94571	0.030303	0.972841	-0.0181818	0.758833	-0.115152
- CD8 T GZMK cells	0.732887	0.127273	0.732887	0.127273	0.707204	0.139394	0.94571	0.030303	0.758833	-0.115152	0.732887	-0.127273
- CD8 T proliferative cells	0.00607363	0.85	0.0172233	0.783333	0.147525	0.533333	0.358581	0.35	0.132777	-0.55	0.0311232	-0.733333
- IFN T cells	0.0833333	0.9	0.0166667	1	0.45	0.5	0.133333	0.8	0.35	-0.6	0.0166667	-1
- NKT cells	0.551709	0.233333	0.551709	0.233333	0.809981	0.1	0.613404	0.2	0.880093	-0.0666667	0.436624	-0.3
- NK FGFBP2 cells	0.802778	0.142857	0.802778	0.142857	0.175	-0.657143	0.713889	0.2	0.297222	0.542857	0.713889	0.2
- NK KRT81 KLRC1 cells	0.64364	0.183333	0.64364	0.183333	0.948391	0.0333333	0.385323	0.333333	0.33626	-0.366667	0.41008	-0.316667
- B cells	0.683333	-0.3	0.95	0.1	0.133333	0.8	0.683333	-0.3	0.516667	-0.4	0.683333	-0.3
Oligodendrocytes	0.903739	0.041958	0.921184	0.034965	0.470906	0.230769	0.732775	-0.111888	0.86898	-0.0559441	0.86898	-0.0559441
Endothelial cells	0.879545	-0.0461538	0.855675	0.0549451	0.227139	0.345055	0.867596	0.0505495	0.214891	-0.353846	0.903515	-0.0373626
