# Supplementary material for: Global hypo-methylation in a proportion of glioblastoma enriched for an astrocytic signature is associated with increased invasion and altered immune landscape
Source: eLife. 2022 Nov 22;11:e77335. doi: 10.7554/eLife.77335 (PMC9681209; doi:10.7554/eLife.77335)
Supplement: Supplementary file 2. [file elife-77335-supp2.xlsx]

## Sheet: Overview
Differentially expressed genes in the Myeloid cell populations of the integrated dataset from newly diagnosed human GBM tumours of Antunes et al. and the 10x GBM tumours of Neftel et al.
											Column description
											gene	Gene name
											description	Ensembl gene description
											p_val	p value
											avg_logFC	Natural logarithm transformed fold-chage of the average expression between the two groups. Positive values indicate that the gene is more highly expressed in the first group.
											pct.1	The percentage of cells where the gene is detected in the first group
											pct.2	The percentage of cells where the gene is detected in the second group
											p_val_adj	Adjusted p-value, based on bonferroni correction using all genes in the dataset
											cluster.1	First group of cells
											cluster.2	Second group of cells
											dataset	Analysed dataset
											ave.norm.expr.1	Average expression of the gene in the first group
											ave.norm.expr.2	Average expression of the gene in the second group
											pseudocount	Pseudocount to add to averaged expression values when calculating logFC values
											max.cells.per.ident	Down sample each identity class to a maximum number of cells. Default is no downsampling (set to Inf)

## Sheet: mg-TAM 1
gene	description	p_val	avg_logFC	pct.1	pct.2	p_val_adj	cluster.1	cluster.2	dataset	ave.norm.expr.1	ave.norm.expr.2	pseudocount	max.cells.per.ident
TMIGD3	transmembrane and immunoglobulin domain containing 3 [Source:HGNC Symbol;Acc:HGNC:51375]	2.74899e-55	0.62319	0.834	0.527	6.86642e-51	mg-TAM 1	All other cells	ND1_7.Neftel_2019_10x Myeloid_cells	7.51252	3.98207	0.1	1000
HAMP	hepcidin antimicrobial peptide [Source:HGNC Symbol;Acc:HGNC:15598]	2.06342e-53	0.945958	0.764	0.402	5.15401e-49	mg-TAM 1	All other cells	ND1_7.Neftel_2019_10x Myeloid_cells	11.1164	4.25543	0.1	1000
S100A8	S100 calcium binding protein A8 [Source:HGNC Symbol;Acc:HGNC:10498]	9.34846e-53	0.283128	0.764	0.409	2.33506e-48	mg-TAM 1	All other cells	ND1_7.Neftel_2019_10x Myeloid_cells	7.84192	5.88363	0.1	1000
TMSB4X	thymosin beta 4 X-linked [Source:HGNC Symbol;Acc:HGNC:11881]	9.53884e-52	0.29006	1	0.999	2.38261e-47	mg-TAM 1	All other cells	ND1_7.Neftel_2019_10x Myeloid_cells	269.137	201.348	0.1	1000
SPP1	secreted phosphoprotein 1 [Source:HGNC Symbol;Acc:HGNC:11255]	4.70412e-51	0.600877	0.999	0.941	1.17499e-46	mg-TAM 1	All other cells	ND1_7.Neftel_2019_10x Myeloid_cells	294.814	161.61	0.1	1000
HPGDS	hematopoietic prostaglandin D synthase [Source:HGNC Symbol;Acc:HGNC:17890]	3.4637e-50	0.487234	0.693	0.317	8.65162e-46	mg-TAM 1	All other cells	ND1_7.Neftel_2019_10x Myeloid_cells	1.5748	0.928868	0.1	1000
FSCN1	fascin actin-bundling protein 1 [Source:HGNC Symbol;Acc:HGNC:11148]	1.47071e-49	0.489099	0.769	0.435	3.67353e-45	mg-TAM 1	All other cells	ND1_7.Neftel_2019_10x Myeloid_cells	2.4327	1.453	0.1	1000
SCIN	scinderin [Source:HGNC Symbol;Acc:HGNC:21695]	1.70866e-48	0.617287	0.816	0.42	4.26789e-44	mg-TAM 1	All other cells	ND1_7.Neftel_2019_10x Myeloid_cells	3.15659	1.65662	0.1	1000
FCGR1A	Fc fragment of IgG receptor Ia [Source:HGNC Symbol;Acc:HGNC:3613]	8.36156e-48	0.463024	0.944	0.674	2.08855e-43	mg-TAM 1	All other cells	ND1_7.Neftel_2019_10x Myeloid_cells	6.25936	3.90244	0.1	1000
BIN1	bridging integrator 1 [Source:HGNC Symbol;Acc:HGNC:1052]	2.49404e-46	0.549745	0.919	0.652	6.22961e-42	mg-TAM 1	All other cells	ND1_7.Neftel_2019_10x Myeloid_cells	7.41574	4.23731	0.1	1000
FCGBP	Fc fragment of IgG binding protein [Source:HGNC Symbol;Acc:HGNC:13572]	2.31978e-45	0.459738	0.832	0.503	5.79436e-41	mg-TAM 1	All other cells	ND1_7.Neftel_2019_10x Myeloid_cells	7.29485	4.56947	0.1	1000
PRDX1	peroxiredoxin 1 [Source:HGNC Symbol;Acc:HGNC:9352]	5.05327e-45	0.363871	0.989	0.803	1.2622e-40	mg-TAM 1	All other cells	ND1_7.Neftel_2019_10x Myeloid_cells	7.65678	5.29082	0.1	1000
CHCHD7	coiled-coil-helix-coiled-coil-helix domain containing 7 [Source:HGNC Symbol;Acc:HGNC:28314]	1.94191e-43	0.535545	0.697	0.371	4.85051e-39	mg-TAM 1	All other cells	ND1_7.Neftel_2019_10x Myeloid_cells	1.65882	0.929525	0.1	1000
TREM2	triggering receptor expressed on myeloid cells 2 [Source:HGNC Symbol;Acc:HGNC:17761]	1.05085e-40	0.327587	0.995	0.863	2.62482e-36	mg-TAM 1	All other cells	ND1_7.Neftel_2019_10x Myeloid_cells	16.8101	12.0865	0.1	1000
S100A11	S100 calcium binding protein A11 [Source:HGNC Symbol;Acc:HGNC:10488]	7.54501e-40	0.260394	1	0.966	1.88459e-35	mg-TAM 1	All other cells	ND1_7.Neftel_2019_10x Myeloid_cells	28.6561	22.0637	0.1	1000
NDUFB8	NADH:ubiquinone oxidoreductase subunit B8 [Source:HGNC Symbol;Acc:HGNC:7703]	1.75021e-39	0.380627	0.657	0.337	4.37169e-35	mg-TAM 1	All other cells	ND1_7.Neftel_2019_10x Myeloid_cells	1.79148	1.1927	0.1	1000
FPR1	formyl peptide receptor 1 [Source:HGNC Symbol;Acc:HGNC:3826]	8.48047e-39	0.346864	0.927	0.686	2.11825e-34	mg-TAM 1	All other cells	ND1_7.Neftel_2019_10x Myeloid_cells	5.23565	3.67178	0.1	1000
C1QB	complement C1q B chain [Source:HGNC Symbol;Acc:HGNC:1242]	1.11456e-37	0.302387	0.999	0.962	2.78396e-33	mg-TAM 1	All other cells	ND1_7.Neftel_2019_10x Myeloid_cells	85.4445	63.1218	0.1	1000
MPC2	mitochondrial pyruvate carrier 2 [Source:HGNC Symbol;Acc:HGNC:24515]	2.20464e-37	0.399017	0.845	0.541	5.50676e-33	mg-TAM 1	All other cells	ND1_7.Neftel_2019_10x Myeloid_cells	2.84293	1.87465	0.1	1000
MGST2	microsomal glutathione S-transferase 2 [Source:HGNC Symbol;Acc:HGNC:7063]	4.53689e-37	0.30589	0.817	0.518	1.13322e-32	mg-TAM 1	All other cells	ND1_7.Neftel_2019_10x Myeloid_cells	2.15055	1.55746	0.1	1000
VSIG4	V-set and immunoglobulin domain containing 4 [Source:HGNC Symbol;Acc:HGNC:17032]	1.71353e-36	0.412907	0.958	0.756	4.28006e-32	mg-TAM 1	All other cells	ND1_7.Neftel_2019_10x Myeloid_cells	11.0802	7.29818	0.1	1000
MYDGF	myeloid derived growth factor [Source:HGNC Symbol;Acc:HGNC:16948]	1.99915e-36	0.422357	0.799	0.496	4.99349e-32	mg-TAM 1	All other cells	ND1_7.Neftel_2019_10x Myeloid_cells	2.67409	1.71842	0.1	1000
TSPO	translocator protein [Source:HGNC Symbol;Acc:HGNC:1158]	8.26053e-36	0.351135	0.978	0.822	2.06332e-31	mg-TAM 1	All other cells	ND1_7.Neftel_2019_10x Myeloid_cells	7.82555	5.4787	0.1	1000
AIF1	allograft inflammatory factor 1 [Source:HGNC Symbol;Acc:HGNC:352]	3.03069e-35	0.310409	0.998	0.942	7.57005e-31	mg-TAM 1	All other cells	ND1_7.Neftel_2019_10x Myeloid_cells	22.2313	16.2721	0.1	1000
PIH1D1	PIH1 domain containing 1 [Source:HGNC Symbol;Acc:HGNC:26075]	3.73185e-35	0.397661	0.711	0.424	9.32141e-31	mg-TAM 1	All other cells	ND1_7.Neftel_2019_10x Myeloid_cells	2.08924	1.37093	0.1	1000
CALM2	calmodulin 2 [Source:HGNC Symbol;Acc:HGNC:1445]	5.5524e-35	0.289511	0.996	0.891	1.38688e-30	mg-TAM 1	All other cells	ND1_7.Neftel_2019_10x Myeloid_cells	12.7211	9.49828	0.1	1000
PPA1	inorganic pyrophosphatase 1 [Source:HGNC Symbol;Acc:HGNC:9226]	6.39949e-35	0.392337	0.774	0.471	1.59846e-30	mg-TAM 1	All other cells	ND1_7.Neftel_2019_10x Myeloid_cells	2.29674	1.51894	0.1	1000
LINC01235	long intergenic non-protein coding RNA 1235 [Source:HGNC Symbol;Acc:HGNC:49769]	2.45837e-34	0.762479	0.315	0.105	6.14053e-30	mg-TAM 1	All other cells	ND1_7.Neftel_2019_10x Myeloid_cells	0.752172	0.297545	0.1	1000
AP000439.1		6.6094e-34	0.532823	0.371	0.129	1.6509e-29	mg-TAM 1	All other cells	ND1_7.Neftel_2019_10x Myeloid_cells	0.614569	0.319413	0.1	1000
FOLR2	folate receptor beta [Source:HGNC Symbol;Acc:HGNC:3793]	1.40221e-33	0.329224	0.715	0.399	3.50243e-29	mg-TAM 1	All other cells	ND1_7.Neftel_2019_10x Myeloid_cells	3.34147	2.37607	0.1	1000
CORO1A	coronin 1A [Source:HGNC Symbol;Acc:HGNC:2252]	1.62126e-33	0.310596	0.971	0.778	4.04958e-29	mg-TAM 1	All other cells	ND1_7.Neftel_2019_10x Myeloid_cells	6.65919	4.85455	0.1	1000
ABI3	ABI family member 3 [Source:HGNC Symbol;Acc:HGNC:29859]	2.43117e-33	0.399913	0.882	0.578	6.07257e-29	mg-TAM 1	All other cells	ND1_7.Neftel_2019_10x Myeloid_cells	3.02377	1.99411	0.1	1000
UCP2	uncoupling protein 2 [Source:HGNC Symbol;Acc:HGNC:12518]	6.68245e-33	0.398114	0.914	0.643	1.66914e-28	mg-TAM 1	All other cells	ND1_7.Neftel_2019_10x Myeloid_cells	4.0863	2.71146	0.1	1000
GSTM4	glutathione S-transferase mu 4 [Source:HGNC Symbol;Acc:HGNC:4636]	2.36867e-32	0.513834	0.478	0.203	5.91646e-28	mg-TAM 1	All other cells	ND1_7.Neftel_2019_10x Myeloid_cells	0.78207	0.427653	0.1	1000
FCGR1B	Fc fragment of IgG receptor Ib [Source:HGNC Symbol;Acc:HGNC:3614]	7.89282e-32	0.346961	0.679	0.374	1.97147e-27	mg-TAM 1	All other cells	ND1_7.Neftel_2019_10x Myeloid_cells	1.65397	1.13976	0.1	1000
CCND1	cyclin D1 [Source:HGNC Symbol;Acc:HGNC:1582]	8.72146e-32	0.410316	0.596	0.313	2.17845e-27	mg-TAM 1	All other cells	ND1_7.Neftel_2019_10x Myeloid_cells	1.26454	0.805291	0.1	1000
LINC01094	long intergenic non-protein coding RNA 1094 [Source:HGNC Symbol;Acc:HGNC:49219]	2.84919e-31	0.396179	0.675	0.365	7.1167e-27	mg-TAM 1	All other cells	ND1_7.Neftel_2019_10x Myeloid_cells	1.42858	0.928558	0.1	1000
TUBA1B	tubulin alpha 1b [Source:HGNC Symbol;Acc:HGNC:18809]	2.85787e-31	0.347371	0.99	0.884	7.13838e-27	mg-TAM 1	All other cells	ND1_7.Neftel_2019_10x Myeloid_cells	17.6603	12.4485	0.1	1000
APOC2	apolipoprotein C2 [Source:HGNC Symbol;Acc:HGNC:609]	4.27097e-31	0.363822	0.769	0.454	1.0668e-26	mg-TAM 1	All other cells	ND1_7.Neftel_2019_10x Myeloid_cells	2.92883	2.00509	0.1	1000
NDUFC2	NADH:ubiquinone oxidoreductase subunit C2 [Source:HGNC Symbol;Acc:HGNC:7706]	8.88723e-31	0.2501	0.767	0.471	2.21985e-26	mg-TAM 1	All other cells	ND1_7.Neftel_2019_10x Myeloid_cells	2.10078	1.6138	0.1	1000
TMEM119	transmembrane protein 119 [Source:HGNC Symbol;Acc:HGNC:27884]	9.49911e-31	0.26966	0.624	0.331	2.37269e-26	mg-TAM 1	All other cells	ND1_7.Neftel_2019_10x Myeloid_cells	1.29183	0.962858	0.1	1000
GNG7	G protein subunit gamma 7 [Source:HGNC Symbol;Acc:HGNC:4410]	3.20117e-30	0.362316	0.69	0.374	7.99589e-26	mg-TAM 1	All other cells	ND1_7.Neftel_2019_10x Myeloid_cells	1.50151	1.01475	0.1	1000
C1orf54	chromosome 1 open reading frame 54 [Source:HGNC Symbol;Acc:HGNC:26258]	8.82043e-30	0.315521	0.778	0.471	2.20317e-25	mg-TAM 1	All other cells	ND1_7.Neftel_2019_10x Myeloid_cells	2.04374	1.46367	0.1	1000
NME1	NME/NM23 nucleoside diphosphate kinase 1 [Source:HGNC Symbol;Acc:HGNC:7849]	3.18127e-29	0.397684	0.533	0.249	7.94618e-25	mg-TAM 1	All other cells	ND1_7.Neftel_2019_10x Myeloid_cells	1.01815	0.651255	0.1	1000
RP11-552D4.1		7.04083e-29	0.402728	0.778	0.447	1.75866e-24	mg-TAM 1	All other cells	ND1_7.Neftel_2019_10x Myeloid_cells	2.80845	1.84428	0.1	1000
NAA20	N-alpha-acetyltransferase 20, NatB catalytic subunit [Source:HGNC Symbol;Acc:HGNC:15908]	1.10235e-28	0.299465	0.797	0.505	2.75346e-24	mg-TAM 1	All other cells	ND1_7.Neftel_2019_10x Myeloid_cells	2.24526	1.63834	0.1	1000
TIMM8B	translocase of inner mitochondrial membrane 8 homolog B [Source:HGNC Symbol;Acc:HGNC:11818]	2.03978e-28	0.255569	0.67	0.396	5.09496e-24	mg-TAM 1	All other cells	ND1_7.Neftel_2019_10x Myeloid_cells	1.27961	0.968474	0.1	1000
APBB1IP	amyloid beta precursor protein binding family B member 1 interacting protein [Source:HGNC Symbol;Acc:HGNC:17379]	2.77943e-28	0.275147	0.891	0.634	6.94247e-24	mg-TAM 1	All other cells	ND1_7.Neftel_2019_10x Myeloid_cells	3.63219	2.73445	0.1	1000
CYFIP1	cytoplasmic FMR1 interacting protein 1 [Source:HGNC Symbol;Acc:HGNC:13759]	3.96908e-28	0.345717	0.869	0.581	9.91396e-24	mg-TAM 1	All other cells	ND1_7.Neftel_2019_10x Myeloid_cells	3.03454	2.11835	0.1	1000
DNPH1	2'-deoxynucleoside 5'-phosphate N-hydrolase 1 [Source:HGNC Symbol;Acc:HGNC:21218]	5.82995e-28	0.375475	0.633	0.345	1.45621e-23	mg-TAM 1	All other cells	ND1_7.Neftel_2019_10x Myeloid_cells	1.17394	0.775151	0.1	1000
SUSD3	sushi domain containing 3 [Source:HGNC Symbol;Acc:HGNC:28391]	7.09849e-28	0.270347	0.645	0.374	1.77306e-23	mg-TAM 1	All other cells	ND1_7.Neftel_2019_10x Myeloid_cells	1.51819	1.13487	0.1	1000
SERPINF1	serpin family F member 1 [Source:HGNC Symbol;Acc:HGNC:8824]	8.14121e-28	0.35623	0.81	0.522	2.03351e-23	mg-TAM 1	All other cells	ND1_7.Neftel_2019_10x Myeloid_cells	2.76161	1.90402	0.1	1000
MSRB2	methionine sulfoxide reductase B2 [Source:HGNC Symbol;Acc:HGNC:17061]	1.02117e-27	0.404329	0.513	0.257	2.55067e-23	mg-TAM 1	All other cells	ND1_7.Neftel_2019_10x Myeloid_cells	0.820449	0.514331	0.1	1000
RPS17	ribosomal protein S17 [Source:HGNC Symbol;Acc:HGNC:10397]	1.90476e-27	0.367249	0.903	0.741	4.75771e-23	mg-TAM 1	All other cells	ND1_7.Neftel_2019_10x Myeloid_cells	17.7608	12.271	0.1	1000
SYNDIG1	synapse differentiation inducing 1 [Source:HGNC Symbol;Acc:HGNC:15885]	2.16387e-27	0.337757	0.505	0.233	5.40492e-23	mg-TAM 1	All other cells	ND1_7.Neftel_2019_10x Myeloid_cells	0.888257	0.604992	0.1	1000
MINOS1		3.45474e-27	0.308994	0.839	0.563	8.62925e-23	mg-TAM 1	All other cells	ND1_7.Neftel_2019_10x Myeloid_cells	2.78532	2.01836	0.1	1000
GLDN	gliomedin [Source:HGNC Symbol;Acc:HGNC:29514]	9.80079e-27	0.432587	0.636	0.357	2.44804e-22	mg-TAM 1	All other cells	ND1_7.Neftel_2019_10x Myeloid_cells	2.2259	1.40911	0.1	1000
LPAR5	lysophosphatidic acid receptor 5 [Source:HGNC Symbol;Acc:HGNC:13307]	1.22578e-26	0.292999	0.666	0.368	3.06176e-22	mg-TAM 1	All other cells	ND1_7.Neftel_2019_10x Myeloid_cells	1.38591	1.00852	0.1	1000
DNASE2	deoxyribonuclease 2, lysosomal [Source:HGNC Symbol;Acc:HGNC:2960]	2.46833e-26	0.329144	0.816	0.532	6.16538e-22	mg-TAM 1	All other cells	ND1_7.Neftel_2019_10x Myeloid_cells	2.64314	1.87379	0.1	1000
CD14	CD14 molecule [Source:HGNC Symbol;Acc:HGNC:1628]	3.66844e-26	0.38919	0.972	0.854	9.16302e-22	mg-TAM 1	All other cells	ND1_7.Neftel_2019_10x Myeloid_cells	20.3322	13.745	0.1	1000
CYBA	cytochrome b-245 alpha chain [Source:HGNC Symbol;Acc:HGNC:2577]	8.97073e-26	0.277566	0.987	0.913	2.24071e-21	mg-TAM 1	All other cells	ND1_7.Neftel_2019_10x Myeloid_cells	24.2186	18.3244	0.1	1000
CLTA	clathrin light chain A [Source:HGNC Symbol;Acc:HGNC:2090]	2.97674e-25	0.295291	0.913	0.672	7.43531e-21	mg-TAM 1	All other cells	ND1_7.Neftel_2019_10x Myeloid_cells	3.24591	2.39041	0.1	1000
EPB41L2	erythrocyte membrane protein band 4.1 like 2 [Source:HGNC Symbol;Acc:HGNC:3379]	3.25767e-25	0.272054	0.838	0.541	8.13701e-21	mg-TAM 1	All other cells	ND1_7.Neftel_2019_10x Myeloid_cells	2.56307	1.92877	0.1	1000
ARPC1B	actin related protein 2/3 complex subunit 1B [Source:HGNC Symbol;Acc:HGNC:704]	7.92987e-25	0.266344	0.978	0.83	1.98072e-20	mg-TAM 1	All other cells	ND1_7.Neftel_2019_10x Myeloid_cells	8.67219	6.62104	0.1	1000
NAGK	N-acetylglucosamine kinase [Source:HGNC Symbol;Acc:HGNC:17174]	9.56697e-25	0.322458	0.824	0.533	2.38964e-20	mg-TAM 1	All other cells	ND1_7.Neftel_2019_10x Myeloid_cells	2.3594	1.68151	0.1	1000
UQCR11	ubiquinol-cytochrome c reductase, complex III subunit XI [Source:HGNC Symbol;Acc:HGNC:30862]	1.15833e-24	0.28111	0.872	0.644	2.89327e-20	mg-TAM 1	All other cells	ND1_7.Neftel_2019_10x Myeloid_cells	4.70274	3.52581	0.1	1000
NAA10	N-alpha-acetyltransferase 10, NatA catalytic subunit [Source:HGNC Symbol;Acc:HGNC:18704]	1.608e-24	0.358551	0.595	0.31	4.01645e-20	mg-TAM 1	All other cells	ND1_7.Neftel_2019_10x Myeloid_cells	1.06499	0.713968	0.1	1000
SLC2A5	solute carrier family 2 member 5 [Source:HGNC Symbol;Acc:HGNC:11010]	2.69727e-24	0.27685	0.775	0.439	6.73725e-20	mg-TAM 1	All other cells	ND1_7.Neftel_2019_10x Myeloid_cells	2.0436	1.52521	0.1	1000
PSMA2	proteasome 20S subunit alpha 2 [Source:HGNC Symbol;Acc:HGNC:9531]	4.57884e-24	0.300305	0.417	0.184	1.1437e-19	mg-TAM 1	All other cells	ND1_7.Neftel_2019_10x Myeloid_cells	0.662528	0.464723	0.1	1000
APOE	apolipoprotein E [Source:HGNC Symbol;Acc:HGNC:613]	9.10239e-24	0.269698	0.987	0.919	2.2736e-19	mg-TAM 1	All other cells	ND1_7.Neftel_2019_10x Myeloid_cells	147.459	112.577	0.1	1000
RNASE2	ribonuclease A family member 2 [Source:HGNC Symbol;Acc:HGNC:10045]	9.88501e-24	0.373935	0.629	0.34	2.46908e-19	mg-TAM 1	All other cells	ND1_7.Neftel_2019_10x Myeloid_cells	1.66144	1.11191	0.1	1000
PSMC2	proteasome 26S subunit, ATPase 2 [Source:HGNC Symbol;Acc:HGNC:9548]	1.21234e-23	0.2855	0.502	0.275	3.02818e-19	mg-TAM 1	All other cells	ND1_7.Neftel_2019_10x Myeloid_cells	0.786728	0.566499	0.1	1000
SERPINB6	serpin family B member 6 [Source:HGNC Symbol;Acc:HGNC:8950]	1.32922e-23	0.295102	0.81	0.531	3.32013e-19	mg-TAM 1	All other cells	ND1_7.Neftel_2019_10x Myeloid_cells	2.04611	1.49768	0.1	1000
C17orf89		3.28189e-23	0.294147	0.598	0.334	8.1975e-19	mg-TAM 1	All other cells	ND1_7.Neftel_2019_10x Myeloid_cells	0.981196	0.705671	0.1	1000
ZNF593	zinc finger protein 593 [Source:HGNC Symbol;Acc:HGNC:30943]	7.75596e-23	0.275623	0.41	0.206	1.93728e-18	mg-TAM 1	All other cells	ND1_7.Neftel_2019_10x Myeloid_cells	0.543033	0.388126	0.1	1000
GOLGA4	golgin A4 [Source:HGNC Symbol;Acc:HGNC:4427]	8.46736e-23	0.400919	0.536	0.296	2.11498e-18	mg-TAM 1	All other cells	ND1_7.Neftel_2019_10x Myeloid_cells	1.23746	0.795704	0.1	1000
ANP32A	acidic nuclear phosphoprotein 32 family member A [Source:HGNC Symbol;Acc:HGNC:13233]	1.06568e-22	0.252277	0.789	0.504	2.66186e-18	mg-TAM 1	All other cells	ND1_7.Neftel_2019_10x Myeloid_cells	1.89274	1.44841	0.1	1000
LTC4S	leukotriene C4 synthase [Source:HGNC Symbol;Acc:HGNC:6719]	1.90454e-22	0.260972	0.768	0.495	4.75716e-18	mg-TAM 1	All other cells	ND1_7.Neftel_2019_10x Myeloid_cells	2.18562	1.66062	0.1	1000
MRPS23	mitochondrial ribosomal protein S23 [Source:HGNC Symbol;Acc:HGNC:14509]	2.51658e-22	0.27134	0.463	0.235	6.28592e-18	mg-TAM 1	All other cells	ND1_7.Neftel_2019_10x Myeloid_cells	0.633763	0.459389	0.1	1000
AP005530.2		2.93333e-22	0.310431	0.365	0.156	7.32688e-18	mg-TAM 1	All other cells	ND1_7.Neftel_2019_10x Myeloid_cells	0.600804	0.413781	0.1	1000
SIGLEC9	sialic acid binding Ig like lectin 9 [Source:HGNC Symbol;Acc:HGNC:10878]	3.82248e-22	0.314606	0.438	0.219	9.5478e-18	mg-TAM 1	All other cells	ND1_7.Neftel_2019_10x Myeloid_cells	0.63849	0.439154	0.1	1000
FAM49B		4.37987e-22	0.250261	0.928	0.737	1.094e-17	mg-TAM 1	All other cells	ND1_7.Neftel_2019_10x Myeloid_cells	4.14789	3.2074	0.1	1000
PLPP1	phospholipid phosphatase 1 [Source:HGNC Symbol;Acc:HGNC:9228]	5.02155e-22	0.343022	0.285	0.122	1.25428e-17	mg-TAM 1	All other cells	ND1_7.Neftel_2019_10x Myeloid_cells	0.387275	0.245781	0.1	1000
CDC123	cell division cycle 123 [Source:HGNC Symbol;Acc:HGNC:16827]	5.21092e-22	0.329995	0.551	0.288	1.30158e-17	mg-TAM 1	All other cells	ND1_7.Neftel_2019_10x Myeloid_cells	0.885164	0.608261	0.1	1000
CXADR	CXADR Ig-like cell adhesion molecule [Source:HGNC Symbol;Acc:HGNC:2559]	6.28915e-22	0.408535	0.264	0.103	1.5709e-17	mg-TAM 1	All other cells	ND1_7.Neftel_2019_10x Myeloid_cells	0.364998	0.209049	0.1	1000
GADD45GIP1	GADD45G interacting protein 1 [Source:HGNC Symbol;Acc:HGNC:29996]	6.4817e-22	0.295753	0.75	0.469	1.619e-17	mg-TAM 1	All other cells	ND1_7.Neftel_2019_10x Myeloid_cells	1.61397	1.17515	0.1	1000
PSENEN	presenilin enhancer, gamma-secretase subunit [Source:HGNC Symbol;Acc:HGNC:30100]	7.59756e-22	0.266532	0.663	0.377	1.89772e-17	mg-TAM 1	All other cells	ND1_7.Neftel_2019_10x Myeloid_cells	1.28465	0.960687	0.1	1000
RP11-557H15.4		7.92362e-22	0.33934	0.242	0.094	1.97916e-17	mg-TAM 1	All other cells	ND1_7.Neftel_2019_10x Myeloid_cells	0.312908	0.194089	0.1	1000
TNFAIP8L2	TNF alpha induced protein 8 like 2 [Source:HGNC Symbol;Acc:HGNC:26277]	9.10073e-22	0.352252	0.554	0.281	2.27318e-17	mg-TAM 1	All other cells	ND1_7.Neftel_2019_10x Myeloid_cells	0.905513	0.606979	0.1	1000
TMBIM4	transmembrane BAX inhibitor motif containing 4 [Source:HGNC Symbol;Acc:HGNC:24257]	1.00426e-21	0.262707	0.599	0.315	2.50843e-17	mg-TAM 1	All other cells	ND1_7.Neftel_2019_10x Myeloid_cells	1.29295	0.971135	0.1	1000
PDPN	podoplanin [Source:HGNC Symbol;Acc:HGNC:29602]	1.11501e-21	0.255765	0.631	0.339	2.78508e-17	mg-TAM 1	All other cells	ND1_7.Neftel_2019_10x Myeloid_cells	1.21181	0.915762	0.1	1000
AKR1A1	aldo-keto reductase family 1 member A1 [Source:HGNC Symbol;Acc:HGNC:380]	1.43315e-21	0.265662	0.888	0.612	3.57971e-17	mg-TAM 1	All other cells	ND1_7.Neftel_2019_10x Myeloid_cells	2.79609	2.12043	0.1	1000
ACAT1	acetyl-CoA acetyltransferase 1 [Source:HGNC Symbol;Acc:HGNC:93]	1.79604e-21	0.31237	0.503	0.246	4.48616e-17	mg-TAM 1	All other cells	ND1_7.Neftel_2019_10x Myeloid_cells	0.729195	0.506731	0.1	1000
LGALS9	galectin 9 [Source:HGNC Symbol;Acc:HGNC:6570]	2.36707e-21	0.301379	0.873	0.601	5.91247e-17	mg-TAM 1	All other cells	ND1_7.Neftel_2019_10x Myeloid_cells	2.80787	2.05124	0.1	1000
GPR65	G protein-coupled receptor 65 [Source:HGNC Symbol;Acc:HGNC:4517]	2.9799e-21	0.297295	0.615	0.367	7.4432e-17	mg-TAM 1	All other cells	ND1_7.Neftel_2019_10x Myeloid_cells	1.3189	0.953997	0.1	1000
CORO1B	coronin 1B [Source:HGNC Symbol;Acc:HGNC:2253]	4.00119e-21	0.265304	0.753	0.487	9.99418e-17	mg-TAM 1	All other cells	ND1_7.Neftel_2019_10x Myeloid_cells	1.67078	1.25814	0.1	1000
SNU13	small nuclear ribonucleoprotein 13 [Source:HGNC Symbol;Acc:HGNC:7819]	4.1751e-21	0.289868	0.715	0.44	1.04286e-16	mg-TAM 1	All other cells	ND1_7.Neftel_2019_10x Myeloid_cells	1.64648	1.207	0.1	1000
RP11-597D13.8		4.52106e-21	0.327641	0.326	0.139	1.12927e-16	mg-TAM 1	All other cells	ND1_7.Neftel_2019_10x Myeloid_cells	0.471578	0.311892	0.1	1000
TWF2	twinfilin actin binding protein 2 [Source:HGNC Symbol;Acc:HGNC:9621]	6.01555e-21	0.293792	0.766	0.492	1.50257e-16	mg-TAM 1	All other cells	ND1_7.Neftel_2019_10x Myeloid_cells	1.80264	1.31829	0.1	1000
SLC25A19	solute carrier family 25 member 19 [Source:HGNC Symbol;Acc:HGNC:14409]	1.86762e-20	0.408747	0.475	0.23	4.66493e-16	mg-TAM 1	All other cells	ND1_7.Neftel_2019_10x Myeloid_cells	0.846729	0.529085	0.1	1000
CEBPA	CCAAT enhancer binding protein alpha [Source:HGNC Symbol;Acc:HGNC:1833]	2.55127e-20	0.278033	0.534	0.289	6.37255e-16	mg-TAM 1	All other cells	ND1_7.Neftel_2019_10x Myeloid_cells	0.967882	0.708677	0.1	1000
MARCH2		3.05882e-20	0.284828	0.411	0.212	7.64033e-16	mg-TAM 1	All other cells	ND1_7.Neftel_2019_10x Myeloid_cells	0.564066	0.399473	0.1	1000
P2RY11	purinergic receptor P2Y11 [Source:HGNC Symbol;Acc:HGNC:8540]	3.42552e-20	0.394098	0.33	0.137	8.55626e-16	mg-TAM 1	All other cells	ND1_7.Neftel_2019_10x Myeloid_cells	0.451036	0.271557	0.1	1000
WIPF3	WAS/WASL interacting protein family member 3 [Source:HGNC Symbol;Acc:HGNC:22004]	3.50365e-20	0.410608	0.328	0.135	8.75141e-16	mg-TAM 1	All other cells	ND1_7.Neftel_2019_10x Myeloid_cells	0.467473	0.276375	0.1	1000
IGSF6	immunoglobulin superfamily member 6 [Source:HGNC Symbol;Acc:HGNC:5953]	6.5857e-20	0.267155	0.842	0.586	1.64498e-15	mg-TAM 1	All other cells	ND1_7.Neftel_2019_10x Myeloid_cells	3.49028	2.64856	0.1	1000
ACAA2	acetyl-CoA acyltransferase 2 [Source:HGNC Symbol;Acc:HGNC:83]	8.74095e-20	0.343763	0.492	0.246	2.18331e-15	mg-TAM 1	All other cells	ND1_7.Neftel_2019_10x Myeloid_cells	0.762052	0.511278	0.1	1000
NUDT5	nudix hydrolase 5 [Source:HGNC Symbol;Acc:HGNC:8052]	9.05361e-20	0.259991	0.526	0.281	2.26141e-15	mg-TAM 1	All other cells	ND1_7.Neftel_2019_10x Myeloid_cells	0.823377	0.611978	0.1	1000
PSMA4	proteasome 20S subunit alpha 4 [Source:HGNC Symbol;Acc:HGNC:9533]	1.17306e-19	0.260716	0.766	0.484	2.93007e-15	mg-TAM 1	All other cells	ND1_7.Neftel_2019_10x Myeloid_cells	1.81476	1.37532	0.1	1000
NEAT1	nuclear paraspeckle assembly transcript 1 [Source:HGNC Symbol;Acc:HGNC:30815]	1.23125e-19	-0.595952	0.949	0.903	3.07541e-15	mg-TAM 1	All other cells	ND1_7.Neftel_2019_10x Myeloid_cells	7.72211	14.0952	0.1	1000
CHCHD1	coiled-coil-helix-coiled-coil-helix domain containing 1 [Source:HGNC Symbol;Acc:HGNC:23518]	2.19116e-19	0.285288	0.536	0.288	5.47307e-15	mg-TAM 1	All other cells	ND1_7.Neftel_2019_10x Myeloid_cells	0.819965	0.591627	0.1	1000
SNCA	synuclein alpha [Source:HGNC Symbol;Acc:HGNC:11138]	4.51833e-19	0.299186	0.629	0.35	1.12859e-14	mg-TAM 1	All other cells	ND1_7.Neftel_2019_10x Myeloid_cells	1.18259	0.850943	0.1	1000
C2	complement C2 [Source:HGNC Symbol;Acc:HGNC:1248]	4.70404e-19	0.25433	0.508	0.272	1.17498e-14	mg-TAM 1	All other cells	ND1_7.Neftel_2019_10x Myeloid_cells	0.962845	0.724168	0.1	1000
ARL2	ADP ribosylation factor like GTPase 2 [Source:HGNC Symbol;Acc:HGNC:693]	5.11449e-19	0.258931	0.53	0.276	1.2775e-14	mg-TAM 1	All other cells	ND1_7.Neftel_2019_10x Myeloid_cells	0.885155	0.660418	0.1	1000
TMEM176B	transmembrane protein 176B [Source:HGNC Symbol;Acc:HGNC:29596]	6.35157e-19	0.343061	0.778	0.535	1.58649e-14	mg-TAM 1	All other cells	ND1_7.Neftel_2019_10x Myeloid_cells	4.89668	3.44562	0.1	1000
MRPL12	mitochondrial ribosomal protein L12 [Source:HGNC Symbol;Acc:HGNC:10378]	6.7678e-19	0.353501	0.422	0.207	1.69046e-14	mg-TAM 1	All other cells	ND1_7.Neftel_2019_10x Myeloid_cells	0.624966	0.40909	0.1	1000
SF3B6	splicing factor 3b subunit 6 [Source:HGNC Symbol;Acc:HGNC:30096]	7.59567e-19	0.274148	0.641	0.389	1.89725e-14	mg-TAM 1	All other cells	ND1_7.Neftel_2019_10x Myeloid_cells	1.24137	0.919733	0.1	1000
GAS6	growth arrest specific 6 [Source:HGNC Symbol;Acc:HGNC:4168]	1.04055e-18	0.325555	0.575	0.322	2.59908e-14	mg-TAM 1	All other cells	ND1_7.Neftel_2019_10x Myeloid_cells	1.12172	0.782235	0.1	1000
CDKN2A	cyclin dependent kinase inhibitor 2A [Source:HGNC Symbol;Acc:HGNC:1787]	1.17987e-18	0.371614	0.311	0.135	2.94708e-14	mg-TAM 1	All other cells	ND1_7.Neftel_2019_10x Myeloid_cells	0.407861	0.250231	0.1	1000
NDRG2	NDRG family member 2 [Source:HGNC Symbol;Acc:HGNC:14460]	1.85159e-18	0.254327	0.5	0.281	4.62489e-14	mg-TAM 1	All other cells	ND1_7.Neftel_2019_10x Myeloid_cells	0.873213	0.654667	0.1	1000
LAP3	leucine aminopeptidase 3 [Source:HGNC Symbol;Acc:HGNC:18449]	2.03983e-18	0.298246	0.8	0.517	5.09509e-14	mg-TAM 1	All other cells	ND1_7.Neftel_2019_10x Myeloid_cells	2.32275	1.69797	0.1	1000
AREG	amphiregulin [Source:HGNC Symbol;Acc:HGNC:651]	2.87355e-18	-2.3442	0.092	0.201	7.17756e-14	mg-TAM 1	All other cells	ND1_7.Neftel_2019_10x Myeloid_cells	0.282906	3.89176	0.1	1000
SELENBP1	selenium binding protein 1 [Source:HGNC Symbol;Acc:HGNC:10719]	3.29664e-18	0.451378	0.177	0.052	8.23435e-14	mg-TAM 1	All other cells	ND1_7.Neftel_2019_10x Myeloid_cells	0.23572	0.11377	0.1	1000
ISOC2	isochorismatase domain containing 2 [Source:HGNC Symbol;Acc:HGNC:26278]	3.33945e-18	0.366255	0.437	0.21	8.34127e-14	mg-TAM 1	All other cells	ND1_7.Neftel_2019_10x Myeloid_cells	0.640458	0.413379	0.1	1000
SPATA6	spermatogenesis associated 6 [Source:HGNC Symbol;Acc:HGNC:18309]	9.52056e-18	0.308337	0.245	0.11	2.37805e-13	mg-TAM 1	All other cells	ND1_7.Neftel_2019_10x Myeloid_cells	0.342655	0.225204	0.1	1000
MTX1	metaxin 1 [Source:HGNC Symbol;Acc:HGNC:7504]	1.00977e-17	0.259709	0.376	0.187	2.5222e-13	mg-TAM 1	All other cells	ND1_7.Neftel_2019_10x Myeloid_cells	0.484957	0.351164	0.1	1000
FUOM	fucose mutarotase [Source:HGNC Symbol;Acc:HGNC:24733]	1.02205e-17	0.309038	0.586	0.329	2.55288e-13	mg-TAM 1	All other cells	ND1_7.Neftel_2019_10x Myeloid_cells	1.03198	0.731043	0.1	1000
LINC00998		1.0446e-17	0.277803	0.556	0.312	2.60921e-13	mg-TAM 1	All other cells	ND1_7.Neftel_2019_10x Myeloid_cells	0.923491	0.675239	0.1	1000
FAM195B		1.21914e-17	0.258704	0.558	0.305	3.04517e-13	mg-TAM 1	All other cells	ND1_7.Neftel_2019_10x Myeloid_cells	0.953407	0.713284	0.1	1000
LY96	lymphocyte antigen 96 [Source:HGNC Symbol;Acc:HGNC:17156]	1.50499e-17	0.347034	0.801	0.542	3.75917e-13	mg-TAM 1	All other cells	ND1_7.Neftel_2019_10x Myeloid_cells	2.41318	1.67627	0.1	1000
TGFBR1	transforming growth factor beta receptor 1 [Source:HGNC Symbol;Acc:HGNC:11772]	2.42235e-17	0.271962	0.609	0.352	6.05055e-13	mg-TAM 1	All other cells	ND1_7.Neftel_2019_10x Myeloid_cells	1.15263	0.854356	0.1	1000
IBSP	integrin binding sialoprotein [Source:HGNC Symbol;Acc:HGNC:5341]	2.82363e-17	1.27523	0.192	0.069	7.05286e-13	mg-TAM 1	All other cells	ND1_7.Neftel_2019_10x Myeloid_cells	3.75926	0.978153	0.1	1000
CRYBB1	crystallin beta B1 [Source:HGNC Symbol;Acc:HGNC:2397]	3.54132e-17	0.289729	0.248	0.099	8.8455e-13	mg-TAM 1	All other cells	ND1_7.Neftel_2019_10x Myeloid_cells	0.298279	0.198098	0.1	1000
NUDT14	nudix hydrolase 14 [Source:HGNC Symbol;Acc:HGNC:20141]	5.27314e-17	0.368412	0.611	0.347	1.31712e-12	mg-TAM 1	All other cells	ND1_7.Neftel_2019_10x Myeloid_cells	1.19451	0.795583	0.1	1000
MSLN	mesothelin [Source:HGNC Symbol;Acc:HGNC:7371]	5.28609e-17	0.470797	0.186	0.059	1.32036e-12	mg-TAM 1	All other cells	ND1_7.Neftel_2019_10x Myeloid_cells	0.249299	0.118139	0.1	1000
GIMAP1	GTPase, IMAP family member 1 [Source:HGNC Symbol;Acc:HGNC:23237]	8.92114e-17	0.299759	0.374	0.187	2.22832e-12	mg-TAM 1	All other cells	ND1_7.Neftel_2019_10x Myeloid_cells	0.554026	0.384632	0.1	1000
MTUS1	microtubule associated scaffold protein 1 [Source:HGNC Symbol;Acc:HGNC:29789]	1.1204e-16	0.25252	0.329	0.148	2.79853e-12	mg-TAM 1	All other cells	ND1_7.Neftel_2019_10x Myeloid_cells	0.436453	0.316739	0.1	1000
RP3-522D1.1		1.44113e-16	0.333782	0.267	0.116	3.59966e-12	mg-TAM 1	All other cells	ND1_7.Neftel_2019_10x Myeloid_cells	0.354727	0.22568	0.1	1000
C4orf48	chromosome 4 open reading frame 48 [Source:HGNC Symbol;Acc:HGNC:34437]	2.10965e-16	0.25204	0.813	0.553	5.26947e-12	mg-TAM 1	All other cells	ND1_7.Neftel_2019_10x Myeloid_cells	2.1026	1.61189	0.1	1000
CD44	CD44 molecule (Indian blood group) [Source:HGNC Symbol;Acc:HGNC:1681]	2.45031e-16	-0.97572	0.177	0.292	6.12039e-12	mg-TAM 1	All other cells	ND1_7.Neftel_2019_10x Myeloid_cells	0.300841	0.963463	0.1	1000
SUSD1	sushi domain containing 1 [Source:HGNC Symbol;Acc:HGNC:25413]	4.9653e-16	0.471791	0.212	0.076	1.24023e-11	mg-TAM 1	All other cells	ND1_7.Neftel_2019_10x Myeloid_cells	0.28943	0.142959	0.1	1000
FAM173A		5.57325e-16	0.265568	0.502	0.28	1.39209e-11	mg-TAM 1	All other cells	ND1_7.Neftel_2019_10x Myeloid_cells	0.72741	0.534433	0.1	1000
SAT1	spermidine/spermine N1-acetyltransferase 1 [Source:HGNC Symbol;Acc:HGNC:10540]	8.68986e-16	-0.401116	0.999	0.986	2.17055e-11	mg-TAM 1	All other cells	ND1_7.Neftel_2019_10x Myeloid_cells	32.4022	48.4418	0.1	1000
CFAP97	cilia and flagella associated protein 97 [Source:HGNC Symbol;Acc:HGNC:29276]	1.06199e-15	0.319856	0.263	0.12	2.65264e-11	mg-TAM 1	All other cells	ND1_7.Neftel_2019_10x Myeloid_cells	0.340197	0.219695	0.1	1000
ITGAV	integrin subunit alpha V [Source:HGNC Symbol;Acc:HGNC:6150]	1.1429e-15	0.252678	0.579	0.331	2.85474e-11	mg-TAM 1	All other cells	ND1_7.Neftel_2019_10x Myeloid_cells	1.04787	0.79157	0.1	1000
CYP19A1	cytochrome P450 family 19 subfamily A member 1 [Source:HGNC Symbol;Acc:HGNC:2594]	1.87037e-15	0.486813	0.162	0.043	4.67181e-11	mg-TAM 1	All other cells	ND1_7.Neftel_2019_10x Myeloid_cells	0.199999	0.0843741	0.1	1000
SHTN1	shootin 1 [Source:HGNC Symbol;Acc:HGNC:29319]	2.82133e-15	0.277001	0.577	0.319	7.04712e-11	mg-TAM 1	All other cells	ND1_7.Neftel_2019_10x Myeloid_cells	1.17466	0.866259	0.1	1000
PTPRN2	protein tyrosine phosphatase receptor type N2 [Source:HGNC Symbol;Acc:HGNC:9677]	3.93381e-15	0.255297	0.332	0.157	9.82588e-11	mg-TAM 1	All other cells	ND1_7.Neftel_2019_10x Myeloid_cells	0.425015	0.306722	0.1	1000
SMIM3	small integral membrane protein 3 [Source:HGNC Symbol;Acc:HGNC:30248]	4.76043e-15	0.288243	0.333	0.143	1.18906e-10	mg-TAM 1	All other cells	ND1_7.Neftel_2019_10x Myeloid_cells	0.538817	0.378844	0.1	1000
APOC1	apolipoprotein C1 [Source:HGNC Symbol;Acc:HGNC:607]	5.52666e-15	0.291404	0.995	0.937	1.38045e-10	mg-TAM 1	All other cells	ND1_7.Neftel_2019_10x Myeloid_cells	67.2714	50.2409	0.1	1000
AHR	aryl hydrocarbon receptor [Source:HGNC Symbol;Acc:HGNC:348]	1.82226e-14	-0.834765	0.048	0.119	4.55163e-10	mg-TAM 1	All other cells	ND1_7.Neftel_2019_10x Myeloid_cells	0.0509982	0.247941	0.1	1000
EXOSC4	exosome component 4 [Source:HGNC Symbol;Acc:HGNC:18189]	3.92035e-14	0.264423	0.334	0.172	9.79224e-10	mg-TAM 1	All other cells	ND1_7.Neftel_2019_10x Myeloid_cells	0.436811	0.312082	0.1	1000
FCGR2B	Fc fragment of IgG receptor IIb [Source:HGNC Symbol;Acc:HGNC:3618]	6.99123e-14	-0.999588	0.122	0.23	1.74627e-09	mg-TAM 1	All other cells	ND1_7.Neftel_2019_10x Myeloid_cells	0.264008	0.88907	0.1	1000
MAP1S	microtubule associated protein 1S [Source:HGNC Symbol;Acc:HGNC:15715]	7.45307e-14	0.252687	0.35	0.179	1.86163e-09	mg-TAM 1	All other cells	ND1_7.Neftel_2019_10x Myeloid_cells	0.461417	0.336058	0.1	1000
MYOZ1	myozenin 1 [Source:HGNC Symbol;Acc:HGNC:13752]	1.60318e-13	0.376406	0.141	0.053	4.00441e-09	mg-TAM 1	All other cells	ND1_7.Neftel_2019_10x Myeloid_cells	0.205732	0.109831	0.1	1000
PTCRA	pre T cell antigen receptor alpha [Source:HGNC Symbol;Acc:HGNC:21290]	1.88428e-13	0.393237	0.215	0.08	4.70656e-09	mg-TAM 1	All other cells	ND1_7.Neftel_2019_10x Myeloid_cells	0.304009	0.172653	0.1	1000
LINC01420		2.08657e-13	0.271665	0.555	0.32	5.21183e-09	mg-TAM 1	All other cells	ND1_7.Neftel_2019_10x Myeloid_cells	0.96209	0.709428	0.1	1000
QPRT	quinolinate phosphoribosyltransferase [Source:HGNC Symbol;Acc:HGNC:9755]	2.42215e-13	0.389675	0.332	0.154	6.05004e-09	mg-TAM 1	All other cells	ND1_7.Neftel_2019_10x Myeloid_cells	0.48694	0.297521	0.1	1000
SLC39A3	solute carrier family 39 member 3 [Source:HGNC Symbol;Acc:HGNC:17128]	2.56103e-13	0.330489	0.402	0.199	6.39695e-09	mg-TAM 1	All other cells	ND1_7.Neftel_2019_10x Myeloid_cells	0.544092	0.362827	0.1	1000
RAMP1	receptor activity modifying protein 1 [Source:HGNC Symbol;Acc:HGNC:9843]	2.64062e-13	0.322357	0.319	0.179	6.59574e-09	mg-TAM 1	All other cells	ND1_7.Neftel_2019_10x Myeloid_cells	0.774164	0.533279	0.1	1000
FAM129A		5.07758e-13	0.255509	0.32	0.162	1.26828e-08	mg-TAM 1	All other cells	ND1_7.Neftel_2019_10x Myeloid_cells	0.427215	0.30834	0.1	1000
RGS2	regulator of G protein signaling 2 [Source:HGNC Symbol;Acc:HGNC:9998]	7.41465e-13	-0.722058	0.541	0.583	1.85203e-08	mg-TAM 1	All other cells	ND1_7.Neftel_2019_10x Myeloid_cells	2.42279	5.09358	0.1	1000
STEAP3	STEAP3 metalloreductase [Source:HGNC Symbol;Acc:HGNC:24592]	1.77871e-12	0.328782	0.229	0.096	4.44286e-08	mg-TAM 1	All other cells	ND1_7.Neftel_2019_10x Myeloid_cells	0.283243	0.175858	0.1	1000
NR4A1	nuclear receptor subfamily 4 group A member 1 [Source:HGNC Symbol;Acc:HGNC:7980]	2.60697e-12	-1.09748	0.382	0.479	6.51169e-08	mg-TAM 1	All other cells	ND1_7.Neftel_2019_10x Myeloid_cells	1.16608	3.69396	0.1	1000
CXCL2	C-X-C motif chemokine ligand 2 [Source:HGNC Symbol;Acc:HGNC:4603]	2.6621e-12	-2.15365	0.042	0.123	6.6494e-08	mg-TAM 1	All other cells	ND1_7.Neftel_2019_10x Myeloid_cells	0.0654324	1.32541	0.1	1000
AHNAK	AHNAK nucleoprotein [Source:HGNC Symbol;Acc:HGNC:347]	3.27449e-12	-0.951698	0.041	0.126	8.17902e-08	mg-TAM 1	All other cells	ND1_7.Neftel_2019_10x Myeloid_cells	0.050998	0.291101	0.1	1000
POMC	proopiomelanocortin [Source:HGNC Symbol;Acc:HGNC:9201]	4.97665e-12	0.287159	0.249	0.115	1.24307e-07	mg-TAM 1	All other cells	ND1_7.Neftel_2019_10x Myeloid_cells	0.322352	0.21693	0.1	1000
FOSB	FosB proto-oncogene, AP-1 transcription factor subunit [Source:HGNC Symbol;Acc:HGNC:3797]	7.40424e-12	-0.841351	0.544	0.604	1.84943e-07	mg-TAM 1	All other cells	ND1_7.Neftel_2019_10x Myeloid_cells	1.54472	3.71493	0.1	1000
DPCD	deleted in primary ciliary dyskinesia homolog (mouse) [Source:HGNC Symbol;Acc:HGNC:24542]	8.61817e-12	0.290645	0.185	0.078	2.15265e-07	mg-TAM 1	All other cells	ND1_7.Neftel_2019_10x Myeloid_cells	0.216766	0.136872	0.1	1000
FAH	fumarylacetoacetate hydrolase [Source:HGNC Symbol;Acc:HGNC:3579]	9.10214e-12	0.25703	0.39	0.213	2.27353e-07	mg-TAM 1	All other cells	ND1_7.Neftel_2019_10x Myeloid_cells	0.591165	0.434509	0.1	1000
HYAL2	hyaluronidase 2 [Source:HGNC Symbol;Acc:HGNC:5321]	2.76776e-11	0.252025	0.199	0.089	6.9133e-07	mg-TAM 1	All other cells	ND1_7.Neftel_2019_10x Myeloid_cells	0.225178	0.152737	0.1	1000
MRPS34	mitochondrial ribosomal protein S34 [Source:HGNC Symbol;Acc:HGNC:16618]	2.86903e-11	0.250581	0.589	0.349	7.16627e-07	mg-TAM 1	All other cells	ND1_7.Neftel_2019_10x Myeloid_cells	0.96167	0.726349	0.1	1000
CH17-340M24.3	uncharacterized protein BC009467 [Source:NCBI gene (formerly Entrezgene);Acc:158960]	3.9953e-11	0.283576	0.306	0.152	9.97947e-07	mg-TAM 1	All other cells	ND1_7.Neftel_2019_10x Myeloid_cells	0.405841	0.280942	0.1	1000
OLFM2	olfactomedin 2 [Source:HGNC Symbol;Acc:HGNC:17189]	4.29573e-11	0.411991	0.158	0.071	1.07299e-06	mg-TAM 1	All other cells	ND1_7.Neftel_2019_10x Myeloid_cells	0.276482	0.149355	0.1	1000
LINC01503	long intergenic non-protein coding RNA 1503 [Source:HGNC Symbol;Acc:HGNC:51184]	4.46742e-11	0.3509	0.211	0.089	1.11587e-06	mg-TAM 1	All other cells	ND1_7.Neftel_2019_10x Myeloid_cells	0.260739	0.15398	0.1	1000
S100A10	S100 calcium binding protein A10 [Source:HGNC Symbol;Acc:HGNC:10487]	5.421e-11	-1.04277	0.471	0.507	1.35406e-06	mg-TAM 1	All other cells	ND1_7.Neftel_2019_10x Myeloid_cells	1.71895	5.06048	0.1	1000
GALE	UDP-galactose-4-epimerase [Source:HGNC Symbol;Acc:HGNC:4116]	8.59869e-11	0.278109	0.215	0.102	2.14778e-06	mg-TAM 1	All other cells	ND1_7.Neftel_2019_10x Myeloid_cells	0.257184	0.170465	0.1	1000
GAMT	guanidinoacetate N-methyltransferase [Source:HGNC Symbol;Acc:HGNC:4136]	1.36672e-10	0.263553	0.322	0.164	3.41381e-06	mg-TAM 1	All other cells	ND1_7.Neftel_2019_10x Myeloid_cells	0.414017	0.294928	0.1	1000
SH3BP5	SH3 domain binding protein 5 [Source:HGNC Symbol;Acc:HGNC:10827]	1.51121e-10	-0.891071	0.038	0.112	3.7747e-06	mg-TAM 1	All other cells	ND1_7.Neftel_2019_10x Myeloid_cells	0.0414022	0.244702	0.1	1000
VCAN	versican [Source:HGNC Symbol;Acc:HGNC:2464]	2.06327e-10	-1.47576	0.043	0.108	5.15364e-06	mg-TAM 1	All other cells	ND1_7.Neftel_2019_10x Myeloid_cells	0.0784723	0.680703	0.1	1000
MCL1	MCL1 apoptosis regulator, BCL2 family member [Source:HGNC Symbol;Acc:HGNC:6943]	2.35637e-10	-0.463411	0.78	0.756	5.88574e-06	mg-TAM 1	All other cells	ND1_7.Neftel_2019_10x Myeloid_cells	3.03954	4.89025	0.1	1000
LYZ	lysozyme [Source:HGNC Symbol;Acc:HGNC:6740]	2.76562e-10	-1.30855	0.539	0.524	6.90798e-06	mg-TAM 1	All other cells	ND1_7.Neftel_2019_10x Myeloid_cells	1.44236	5.60798	0.1	1000
EBPL	EBP like [Source:HGNC Symbol;Acc:HGNC:18061]	3.44886e-10	0.284708	0.342	0.174	8.61455e-06	mg-TAM 1	All other cells	ND1_7.Neftel_2019_10x Myeloid_cells	0.423929	0.294117	0.1	1000
SDS	serine dehydratase [Source:HGNC Symbol;Acc:HGNC:10691]	3.54121e-10	-1.10588	0.08	0.148	8.84523e-06	mg-TAM 1	All other cells	ND1_7.Neftel_2019_10x Myeloid_cells	0.172389	0.723125	0.1	1000
CD83	CD83 molecule [Source:HGNC Symbol;Acc:HGNC:1703]	3.80507e-10	-0.777429	0.543	0.567	9.5043e-06	mg-TAM 1	All other cells	ND1_7.Neftel_2019_10x Myeloid_cells	1.85211	4.14753	0.1	1000
TSPAN13	tetraspanin 13 [Source:HGNC Symbol;Acc:HGNC:21643]	4.15901e-10	0.409012	0.142	0.052	1.03884e-05	mg-TAM 1	All other cells	ND1_7.Neftel_2019_10x Myeloid_cells	0.214266	0.108769	0.1	1000
GPATCH4	G-patch domain containing 4 [Source:HGNC Symbol;Acc:HGNC:25982]	5.44643e-10	0.344525	0.271	0.115	1.36041e-05	mg-TAM 1	All other cells	ND1_7.Neftel_2019_10x Myeloid_cells	0.324968	0.201114	0.1	1000
SNHG25	small nucleolar RNA host gene 25 [Source:HGNC Symbol;Acc:HGNC:51534]	6.12727e-10	0.315579	0.196	0.086	1.53047e-05	mg-TAM 1	All other cells	ND1_7.Neftel_2019_10x Myeloid_cells	0.28074	0.177699	0.1	1000
ZNF480	zinc finger protein 480 [Source:HGNC Symbol;Acc:HGNC:23305]	6.3489e-10	0.251765	0.235	0.107	1.58583e-05	mg-TAM 1	All other cells	ND1_7.Neftel_2019_10x Myeloid_cells	0.274823	0.191397	0.1	1000
ADM	adrenomedullin [Source:HGNC Symbol;Acc:HGNC:259]	6.38175e-10	-1.21646	0.07	0.132	1.59403e-05	mg-TAM 1	All other cells	ND1_7.Neftel_2019_10x Myeloid_cells	0.184262	0.859449	0.1	1000
PROCR	protein C receptor [Source:HGNC Symbol;Acc:HGNC:9452]	7.37727e-10	0.33173	0.254	0.111	1.84269e-05	mg-TAM 1	All other cells	ND1_7.Neftel_2019_10x Myeloid_cells	0.316125	0.198645	0.1	1000
TNFRSF11B	TNF receptor superfamily member 11b [Source:HGNC Symbol;Acc:HGNC:11909]	1.00293e-09	0.437268	0.114	0.041	2.50512e-05	mg-TAM 1	All other cells	ND1_7.Neftel_2019_10x Myeloid_cells	0.209017	0.0995629	0.1	1000
RNASE3	ribonuclease A family member 3 [Source:HGNC Symbol;Acc:HGNC:10046]	1.19095e-09	0.387032	0.177	0.063	2.97475e-05	mg-TAM 1	All other cells	ND1_7.Neftel_2019_10x Myeloid_cells	0.240823	0.131442	0.1	1000
IL21R	interleukin 21 receptor [Source:HGNC Symbol;Acc:HGNC:6006]	1.61858e-09	0.348802	0.102	0.031	4.04289e-05	mg-TAM 1	All other cells	ND1_7.Neftel_2019_10x Myeloid_cells	0.119751	0.0550414	0.1	1000
ANXA1	annexin A1 [Source:HGNC Symbol;Acc:HGNC:533]	3.27502e-09	-0.992198	0.331	0.413	8.18034e-05	mg-TAM 1	All other cells	ND1_7.Neftel_2019_10x Myeloid_cells	0.96423	2.7704	0.1	1000
ANKRD35	ankyrin repeat domain 35 [Source:HGNC Symbol;Acc:HGNC:26323]	4.40571e-09	0.284306	0.113	0.041	0.000110046	mg-TAM 1	All other cells	ND1_7.Neftel_2019_10x Myeloid_cells	0.11777	0.0638798	0.1	1000
INAFM2	InaF motif containing 2 [Source:HGNC Symbol;Acc:HGNC:35165]	4.97079e-09	0.303798	0.156	0.061	0.00012416	mg-TAM 1	All other cells	ND1_7.Neftel_2019_10x Myeloid_cells	0.180987	0.107371	0.1	1000
C15orf48	chromosome 15 open reading frame 48 [Source:HGNC Symbol;Acc:HGNC:29898]	7.86606e-09	-1.37154	0.085	0.144	0.000196478	mg-TAM 1	All other cells	ND1_7.Neftel_2019_10x Myeloid_cells	0.158365	0.918323	0.1	1000
LDHD	lactate dehydrogenase D [Source:HGNC Symbol;Acc:HGNC:19708]	8.01805e-09	0.306909	0.136	0.046	0.000200275	mg-TAM 1	All other cells	ND1_7.Neftel_2019_10x Myeloid_cells	0.143739	0.0793231	0.1	1000
BATF	basic leucine zipper ATF-like transcription factor [Source:HGNC Symbol;Acc:HGNC:958]	1.38273e-08	0.283717	0.157	0.069	0.000345379	mg-TAM 1	All other cells	ND1_7.Neftel_2019_10x Myeloid_cells	0.182827	0.112963	0.1	1000
NR4A3	nuclear receptor subfamily 4 group A member 3 [Source:HGNC Symbol;Acc:HGNC:7982]	1.66784e-08	-1.04906	0.179	0.284	0.000416594	mg-TAM 1	All other cells	ND1_7.Neftel_2019_10x Myeloid_cells	0.392573	1.30628	0.1	1000
METTL7B	methyltransferase like 7B [Source:HGNC Symbol;Acc:HGNC:28276]	1.93527e-08	0.257688	0.108	0.037	0.000483392	mg-TAM 1	All other cells	ND1_7.Neftel_2019_10x Myeloid_cells	0.136355	0.0826634	0.1	1000
DNAJB1	DnaJ heat shock protein family (Hsp40) member B1 [Source:HGNC Symbol;Acc:HGNC:5270]	2.13004e-08	-1.43531	0.341	0.419	0.000532041	mg-TAM 1	All other cells	ND1_7.Neftel_2019_10x Myeloid_cells	1.26728	5.64385	0.1	1000
PPP1R15A	protein phosphatase 1 regulatory subunit 15A [Source:HGNC Symbol;Acc:HGNC:14375]	2.17924e-08	-0.7581	0.557	0.604	0.000544331	mg-TAM 1	All other cells	ND1_7.Neftel_2019_10x Myeloid_cells	1.72491	3.79476	0.1	1000
ATF3	activating transcription factor 3 [Source:HGNC Symbol;Acc:HGNC:785]	2.86925e-08	-1.07632	0.305	0.408	0.000716682	mg-TAM 1	All other cells	ND1_7.Neftel_2019_10x Myeloid_cells	0.777368	2.47407	0.1	1000
FAM3B	FAM3 metabolism regulating signaling molecule B [Source:HGNC Symbol;Acc:HGNC:1253]	4.41553e-08	0.289894	0.152	0.058	0.00110291	mg-TAM 1	All other cells	ND1_7.Neftel_2019_10x Myeloid_cells	0.177565	0.107714	0.1	1000
HSPA6	heat shock protein family A (Hsp70) member 6 [Source:HGNC Symbol;Acc:HGNC:5239]	8.43568e-08	-1.44447	0.128	0.184	0.00210706	mg-TAM 1	All other cells	ND1_7.Neftel_2019_10x Myeloid_cells	0.605548	2.89124	0.1	1000
IGKC	immunoglobulin kappa constant [Source:HGNC Symbol;Acc:HGNC:5716]	1.58539e-07	-0.44804	0.186	0.105	0.00395998	mg-TAM 1	All other cells	ND1_7.Neftel_2019_10x Myeloid_cells	0.238264	0.429464	0.1	1000
KLF6	Kruppel like factor 6 [Source:HGNC Symbol;Acc:HGNC:2235]	1.65728e-07	-0.552625	0.824	0.801	0.00413956	mg-TAM 1	All other cells	ND1_7.Neftel_2019_10x Myeloid_cells	6.32024	11.0571	0.1	1000
SPR	sepiapterin reductase [Source:HGNC Symbol;Acc:HGNC:11257]	1.79147e-07	0.298961	0.132	0.056	0.00447473	mg-TAM 1	All other cells	ND1_7.Neftel_2019_10x Myeloid_cells	0.149809	0.0852556	0.1	1000
NAMPT	nicotinamide phosphoribosyltransferase [Source:HGNC Symbol;Acc:HGNC:30092]	1.90294e-07	-0.797536	0.433	0.482	0.00475317	mg-TAM 1	All other cells	ND1_7.Neftel_2019_10x Myeloid_cells	0.954131	2.24024	0.1	1000
ISG20	interferon stimulated exonuclease gene 20 [Source:HGNC Symbol;Acc:HGNC:6130]	2.54294e-07	-0.900883	0.061	0.121	0.00635175	mg-TAM 1	All other cells	ND1_7.Neftel_2019_10x Myeloid_cells	0.0790146	0.340694	0.1	1000
GPR183	G protein-coupled receptor 183 [Source:HGNC Symbol;Acc:HGNC:3128]	2.60464e-07	-0.447234	0.619	0.607	0.00650588	mg-TAM 1	All other cells	ND1_7.Neftel_2019_10x Myeloid_cells	2.83897	4.4965	0.1	1000
RGS1	regulator of G protein signaling 1 [Source:HGNC Symbol;Acc:HGNC:9991]	3.6079e-07	-0.332923	0.965	0.92	0.00901181	mg-TAM 1	All other cells	ND1_7.Neftel_2019_10x Myeloid_cells	17.0514	23.8269	0.1	1000
GNLY	granulysin [Source:HGNC Symbol;Acc:HGNC:4414]	4.21595e-07	0.368589	0.164	0.076	0.0105306	mg-TAM 1	All other cells	ND1_7.Neftel_2019_10x Myeloid_cells	0.428795	0.265772	0.1	1000
PRR5	proline rich 5 [Source:HGNC Symbol;Acc:HGNC:31682]	4.35573e-07	0.315788	0.145	0.055	0.0108797	mg-TAM 1	All other cells	ND1_7.Neftel_2019_10x Myeloid_cells	0.167525	0.0950828	0.1	1000
RNASE1	ribonuclease A family member 1, pancreatic [Source:HGNC Symbol;Acc:HGNC:10044]	5.10958e-07	-1.20949	0.211	0.283	0.0127627	mg-TAM 1	All other cells	ND1_7.Neftel_2019_10x Myeloid_cells	1.44778	5.08781	0.1	1000
LMNA	lamin A/C [Source:HGNC Symbol;Acc:HGNC:6636]	6.49171e-07	-0.75977	0.129	0.205	0.016215	mg-TAM 1	All other cells	ND1_7.Neftel_2019_10x Myeloid_cells	0.28884	0.731255	0.1	1000
CXCR4	C-X-C motif chemokine receptor 4 [Source:HGNC Symbol;Acc:HGNC:2561]	9.00179e-07	-0.858481	0.533	0.598	0.0224847	mg-TAM 1	All other cells	ND1_7.Neftel_2019_10x Myeloid_cells	2.54456	6.14003	0.1	1000
HBB	hemoglobin subunit beta [Source:HGNC Symbol;Acc:HGNC:4827]	1.27699e-06	-0.658598	0.134	0.191	0.0318967	mg-TAM 1	All other cells	ND1_7.Neftel_2019_10x Myeloid_cells	0.526053	1.10959	0.1	1000
SRGN	serglycin [Source:HGNC Symbol;Acc:HGNC:9361]	1.28961e-06	-0.273552	0.998	0.969	0.032212	mg-TAM 1	All other cells	ND1_7.Neftel_2019_10x Myeloid_cells	21.0764	27.739	0.1	1000
PROC	protein C, inactivator of coagulation factors Va and VIIIa [Source:HGNC Symbol;Acc:HGNC:9451]	1.44527e-06	0.345098	0.16	0.077	0.0361001	mg-TAM 1	All other cells	ND1_7.Neftel_2019_10x Myeloid_cells	0.265975	0.159166	0.1	1000
NR4A2	nuclear receptor subfamily 4 group A member 2 [Source:HGNC Symbol;Acc:HGNC:7981]	1.51946e-06	-0.75116	0.436	0.51	0.0379532	mg-TAM 1	All other cells	ND1_7.Neftel_2019_10x Myeloid_cells	1.36872	3.01289	0.1	1000
CSTB	cystatin B [Source:HGNC Symbol;Acc:HGNC:2482]	1.5973e-06	-0.261693	0.958	0.791	0.0398974	mg-TAM 1	All other cells	ND1_7.Neftel_2019_10x Myeloid_cells	5.16371	6.73822	0.1	1000
LINC00467	long intergenic non-protein coding RNA 467 [Source:HGNC Symbol;Acc:HGNC:28227]	1.68394e-06	0.253592	0.124	0.054	0.0420614	mg-TAM 1	All other cells	ND1_7.Neftel_2019_10x Myeloid_cells	0.151522	0.0951834	0.1	1000
MPEG1	macrophage expressed 1 [Source:HGNC Symbol;Acc:HGNC:29619]	2.27487e-06	-0.656719	0.076	0.129	0.0568217	mg-TAM 1	All other cells	ND1_7.Neftel_2019_10x Myeloid_cells	0.0868058	0.260246	0.1	1000
SOD2	superoxide dismutase 2 [Source:HGNC Symbol;Acc:HGNC:11180]	2.34397e-06	-0.826529	0.584	0.558	0.0585478	mg-TAM 1	All other cells	ND1_7.Neftel_2019_10x Myeloid_cells	1.62753	3.84806	0.1	1000
THBS1	thrombospondin 1 [Source:HGNC Symbol;Acc:HGNC:11785]	2.4541e-06	-1.35171	0.042	0.102	0.0612985	mg-TAM 1	All other cells	ND1_7.Neftel_2019_10x Myeloid_cells	0.0851238	0.615321	0.1	1000
ARL4C	ADP ribosylation factor like GTPase 4C [Source:HGNC Symbol;Acc:HGNC:698]	2.70643e-06	-0.85034	0.148	0.213	0.0676012	mg-TAM 1	All other cells	ND1_7.Neftel_2019_10x Myeloid_cells	0.199036	0.599877	0.1	1000
AGMAT	agmatinase [Source:HGNC Symbol;Acc:HGNC:18407]	3.00264e-06	0.314081	0.139	0.046	0.0750001	mg-TAM 1	All other cells	ND1_7.Neftel_2019_10x Myeloid_cells	0.156346	0.0872506	0.1	1000
BTG1	BTG anti-proliferation factor 1 [Source:HGNC Symbol;Acc:HGNC:1130]	3.27888e-06	-0.556887	0.853	0.773	0.0818997	mg-TAM 1	All other cells	ND1_7.Neftel_2019_10x Myeloid_cells	3.8513	6.79592	0.1	1000
JUND	JunD proto-oncogene, AP-1 transcription factor subunit [Source:HGNC Symbol;Acc:HGNC:6206]	3.90375e-06	-0.806648	0.361	0.417	0.097508	mg-TAM 1	All other cells	ND1_7.Neftel_2019_10x Myeloid_cells	0.523375	1.2966	0.1	1000
C5AR1	complement C5a receptor 1 [Source:HGNC Symbol;Acc:HGNC:1338]	4.44146e-06	-0.640601	0.487	0.497	0.110939	mg-TAM 1	All other cells	ND1_7.Neftel_2019_10x Myeloid_cells	1.14283	2.25842	0.1	1000
SLAMF8	SLAM family member 8 [Source:HGNC Symbol;Acc:HGNC:21391]	5.58867e-06	0.254102	0.252	0.13	0.139594	mg-TAM 1	All other cells	ND1_7.Neftel_2019_10x Myeloid_cells	0.331922	0.235004	0.1	1000
BLVRA	biliverdin reductase A [Source:HGNC Symbol;Acc:HGNC:1062]	6.01206e-06	-0.628626	0.101	0.159	0.150169	mg-TAM 1	All other cells	ND1_7.Neftel_2019_10x Myeloid_cells	0.135732	0.342005	0.1	1000
CXCL3	C-X-C motif chemokine ligand 3 [Source:HGNC Symbol;Acc:HGNC:4604]	6.10815e-06	-2.21828	0.054	0.111	0.152569	mg-TAM 1	All other cells	ND1_7.Neftel_2019_10x Myeloid_cells	0.0806049	1.56003	0.1	1000
HLA-DQA2	major histocompatibility complex, class II, DQ alpha 2 [Source:HGNC Symbol;Acc:HGNC:4943]	7.91148e-06	-0.773186	0.192	0.257	0.197613	mg-TAM 1	All other cells	ND1_7.Neftel_2019_10x Myeloid_cells	0.588264	1.39123	0.1	1000
TGFBI	transforming growth factor beta induced [Source:HGNC Symbol;Acc:HGNC:11771]	1.05884e-05	-0.801747	0.335	0.378	0.264478	mg-TAM 1	All other cells	ND1_7.Neftel_2019_10x Myeloid_cells	0.884216	2.09424	0.1	1000
FLNA	filamin A [Source:HGNC Symbol;Acc:HGNC:3754]	1.13535e-05	-0.742647	0.078	0.13	0.283587	mg-TAM 1	All other cells	ND1_7.Neftel_2019_10x Myeloid_cells	0.103466	0.327582	0.1	1000
HERPUD1	homocysteine inducible ER protein with ubiquitin like domain 1 [Source:HGNC Symbol;Acc:HGNC:13744]	1.19739e-05	-0.551681	0.843	0.773	0.299083	mg-TAM 1	All other cells	ND1_7.Neftel_2019_10x Myeloid_cells	3.80218	6.67484	0.1	1000
MTRNR2L12	MT-RNR2 like 12 [Source:HGNC Symbol;Acc:HGNC:37169]	1.33705e-05	-0.932308	0.278	0.367	0.333969	mg-TAM 1	All other cells	ND1_7.Neftel_2019_10x Myeloid_cells	2.77182	7.19547	0.1	1000
FUCA1	alpha-L-fucosidase 1 [Source:HGNC Symbol;Acc:HGNC:4006]	1.34843e-05	-0.302137	0.46	0.282	0.336811	mg-TAM 1	All other cells	ND1_7.Neftel_2019_10x Myeloid_cells	0.732813	1.02659	0.1	1000
BNIP3	BCL2 interacting protein 3 [Source:HGNC Symbol;Acc:HGNC:1084]	1.6563e-05	-0.957269	0.076	0.115	0.413712	mg-TAM 1	All other cells	ND1_7.Neftel_2019_10x Myeloid_cells	0.122027	0.478286	0.1	1000
GADD45B	growth arrest and DNA damage inducible beta [Source:HGNC Symbol;Acc:HGNC:4096]	2.17813e-05	-0.641319	0.573	0.565	0.544052	mg-TAM 1	All other cells	ND1_7.Neftel_2019_10x Myeloid_cells	2.53233	4.89875	0.1	1000
KCNAB2	potassium voltage-gated channel subfamily A regulatory beta subunit 2 [Source:HGNC Symbol;Acc:HGNC:6229]	2.33169e-05	-0.593251	0.074	0.125	0.582411	mg-TAM 1	All other cells	ND1_7.Neftel_2019_10x Myeloid_cells	0.0873372	0.239054	0.1	1000
PKIB	cAMP-dependent protein kinase inhibitor beta [Source:HGNC Symbol;Acc:HGNC:9018]	2.69464e-05	-0.799074	0.076	0.143	0.673068	mg-TAM 1	All other cells	ND1_7.Neftel_2019_10x Myeloid_cells	0.145274	0.445363	0.1	1000
SEPP1		3.25298e-05	-1.53869	0.174	0.224	0.81253	mg-TAM 1	All other cells	ND1_7.Neftel_2019_10x Myeloid_cells	0.323932	1.87487	0.1	1000
MT-ATP8	mitochondrially encoded ATP synthase membrane subunit 8 [Source:HGNC Symbol;Acc:HGNC:7415]	3.52577e-05	-0.580255	0.201	0.276	0.880666	mg-TAM 1	All other cells	ND1_7.Neftel_2019_10x Myeloid_cells	2.17083	3.95682	0.1	1000
METRNL	meteorin like, glial cell differentiation regulator [Source:HGNC Symbol;Acc:HGNC:27584]	3.57764e-05	-0.779553	0.113	0.166	0.893623	mg-TAM 1	All other cells	ND1_7.Neftel_2019_10x Myeloid_cells	0.132905	0.407849	0.1	1000
NUPR1	nuclear protein 1, transcriptional regulator [Source:HGNC Symbol;Acc:HGNC:29990]	4.11738e-05	-0.491765	0.435	0.338	1	mg-TAM 1	All other cells	ND1_7.Neftel_2019_10x Myeloid_cells	1.47584	2.47681	0.1	1000
MT1E	metallothionein 1E [Source:HGNC Symbol;Acc:HGNC:7397]	5.17241e-05	-1.00944	0.231	0.149	1	mg-TAM 1	All other cells	ND1_7.Neftel_2019_10x Myeloid_cells	0.373352	1.19892	0.1	1000
DOK2	docking protein 2 [Source:HGNC Symbol;Acc:HGNC:2991]	5.24271e-05	-0.563334	0.075	0.121	1	mg-TAM 1	All other cells	ND1_7.Neftel_2019_10x Myeloid_cells	0.0957008	0.243752	0.1	1000
CCL5	C-C motif chemokine ligand 5 [Source:HGNC Symbol;Acc:HGNC:10632]	6.07796e-05	-0.343401	0.168	0.107	1	mg-TAM 1	All other cells	ND1_7.Neftel_2019_10x Myeloid_cells	0.292519	0.453347	0.1	1000
S100A1	S100 calcium binding protein A1 [Source:HGNC Symbol;Acc:HGNC:10486]	0.000104906	0.463718	0.126	0.065	1	mg-TAM 1	All other cells	ND1_7.Neftel_2019_10x Myeloid_cells	0.540488	0.302829	0.1	1000
CDKN1A	cyclin dependent kinase inhibitor 1A [Source:HGNC Symbol;Acc:HGNC:1784]	0.000108811	-0.629295	0.4	0.429	1	mg-TAM 1	All other cells	ND1_7.Neftel_2019_10x Myeloid_cells	1.12276	2.19425	0.1	1000
HSPA1B	heat shock protein family A (Hsp70) member 1B [Source:HGNC Symbol;Acc:HGNC:5233]	0.000111304	-0.954317	0.331	0.387	1	mg-TAM 1	All other cells	ND1_7.Neftel_2019_10x Myeloid_cells	2.48422	6.61095	0.1	1000
IQGAP2	IQ motif containing GTPase activating protein 2 [Source:HGNC Symbol;Acc:HGNC:6111]	0.000127918	-0.512492	0.06	0.102	1	mg-TAM 1	All other cells	ND1_7.Neftel_2019_10x Myeloid_cells	0.0687447	0.18171	0.1	1000
NRP2	neuropilin 2 [Source:HGNC Symbol;Acc:HGNC:8005]	0.000160232	-0.299591	0.218	0.183	1	mg-TAM 1	All other cells	ND1_7.Neftel_2019_10x Myeloid_cells	0.293045	0.430338	0.1	1000
HLA-DRB5	major histocompatibility complex, class II, DR beta 5 [Source:HGNC Symbol;Acc:HGNC:4953]	0.000168022	-0.47593	0.553	0.585	1	mg-TAM 1	All other cells	ND1_7.Neftel_2019_10x Myeloid_cells	7.06864	11.438	0.1	1000
TNFAIP3	TNF alpha induced protein 3 [Source:HGNC Symbol;Acc:HGNC:11896]	0.000184159	-0.978543	0.318	0.374	1	mg-TAM 1	All other cells	ND1_7.Neftel_2019_10x Myeloid_cells	0.577901	1.70361	0.1	1000
KDM6B	lysine demethylase 6B [Source:HGNC Symbol;Acc:HGNC:29012]	0.000200911	-0.694406	0.211	0.263	1	mg-TAM 1	All other cells	ND1_7.Neftel_2019_10x Myeloid_cells	0.290569	0.682122	0.1	1000
IL1RN	interleukin 1 receptor antagonist [Source:HGNC Symbol;Acc:HGNC:6000]	0.000202423	-0.83218	0.084	0.124	1	mg-TAM 1	All other cells	ND1_7.Neftel_2019_10x Myeloid_cells	0.189161	0.564587	0.1	1000
FOSL2	FOS like 2, AP-1 transcription factor subunit [Source:HGNC Symbol;Acc:HGNC:3798]	0.000225435	-0.727076	0.111	0.175	1	mg-TAM 1	All other cells	ND1_7.Neftel_2019_10x Myeloid_cells	0.150334	0.417947	0.1	1000
VEGFA	vascular endothelial growth factor A [Source:HGNC Symbol;Acc:HGNC:12680]	0.000282707	-0.823959	0.102	0.156	1	mg-TAM 1	All other cells	ND1_7.Neftel_2019_10x Myeloid_cells	0.135253	0.43626	0.1	1000
FOS	Fos proto-oncogene, AP-1 transcription factor subunit [Source:HGNC Symbol;Acc:HGNC:3796]	0.00033732	-0.43801	0.896	0.893	1	mg-TAM 1	All other cells	ND1_7.Neftel_2019_10x Myeloid_cells	24.7035	38.336	0.1	1000
STX11	syntaxin 11 [Source:HGNC Symbol;Acc:HGNC:11429]	0.000357857	-0.6491	0.177	0.221	1	mg-TAM 1	All other cells	ND1_7.Neftel_2019_10x Myeloid_cells	0.217531	0.507696	0.1	1000
ISG15	ISG15 ubiquitin like modifier [Source:HGNC Symbol;Acc:HGNC:4053]	0.000393405	-0.487994	0.541	0.393	1	mg-TAM 1	All other cells	ND1_7.Neftel_2019_10x Myeloid_cells	1.59794	2.66602	0.1	1000
ZFP36	ZFP36 ring finger protein [Source:HGNC Symbol;Acc:HGNC:12862]	0.000397027	-0.416352	0.894	0.856	1	mg-TAM 1	All other cells	ND1_7.Neftel_2019_10x Myeloid_cells	12.47	18.9614	0.1	1000
SEC61G	SEC61 translocon subunit gamma [Source:HGNC Symbol;Acc:HGNC:18277]	0.000411233	-0.25097	0.813	0.61	1	mg-TAM 1	All other cells	ND1_7.Neftel_2019_10x Myeloid_cells	2.15874	2.8031	0.1	1000
RPS4Y1	ribosomal protein S4 Y-linked 1 [Source:HGNC Symbol;Acc:HGNC:10425]	0.000431097	-0.405195	0.171	0.252	1	mg-TAM 1	All other cells	ND1_7.Neftel_2019_10x Myeloid_cells	0.773175	1.20941	0.1	1000
CSRNP1	cysteine and serine rich nuclear protein 1 [Source:HGNC Symbol;Acc:HGNC:14300]	0.000432085	-0.632362	0.229	0.277	1	mg-TAM 1	All other cells	ND1_7.Neftel_2019_10x Myeloid_cells	0.323063	0.696227	0.1	1000
NFKBIZ	NFKB inhibitor zeta [Source:HGNC Symbol;Acc:HGNC:29805]	0.000484163	-0.795113	0.217	0.277	1	mg-TAM 1	All other cells	ND1_7.Neftel_2019_10x Myeloid_cells	0.322941	0.836684	0.1	1000
HLA-DPB1	major histocompatibility complex, class II, DP beta 1 [Source:HGNC Symbol;Acc:HGNC:4940]	0.000610875	-0.377785	0.993	0.935	1	mg-TAM 1	All other cells	ND1_7.Neftel_2019_10x Myeloid_cells	16.9284	24.7453	0.1	1000
KMT2E	lysine methyltransferase 2E (inactive) [Source:HGNC Symbol;Acc:HGNC:18541]	0.000617612	-0.29005	0.422	0.351	1	mg-TAM 1	All other cells	ND1_7.Neftel_2019_10x Myeloid_cells	0.590841	0.823305	0.1	1000
ZNF394	zinc finger protein 394 [Source:HGNC Symbol;Acc:HGNC:18832]	0.000618903	-0.290956	0.15	0.109	1	mg-TAM 1	All other cells	ND1_7.Neftel_2019_10x Myeloid_cells	0.161786	0.250192	0.1	1000
MT3	metallothionein 3 [Source:HGNC Symbol;Acc:HGNC:7408]	0.00064675	-0.631043	0.156	0.184	1	mg-TAM 1	All other cells	ND1_7.Neftel_2019_10x Myeloid_cells	0.286877	0.627161	0.1	1000
ANKRD44	ankyrin repeat domain 44 [Source:HGNC Symbol;Acc:HGNC:25259]	0.00065237	-0.296042	0.279	0.227	1	mg-TAM 1	All other cells	ND1_7.Neftel_2019_10x Myeloid_cells	0.355936	0.513019	0.1	1000
VIM	vimentin [Source:HGNC Symbol;Acc:HGNC:12692]	0.00067058	-0.590177	0.745	0.669	1	mg-TAM 1	All other cells	ND1_7.Neftel_2019_10x Myeloid_cells	6.4319	11.6856	0.1	1000
TIMP1	TIMP metallopeptidase inhibitor 1 [Source:HGNC Symbol;Acc:HGNC:11820]	0.000723715	-0.847563	0.716	0.544	1	mg-TAM 1	All other cells	ND1_7.Neftel_2019_10x Myeloid_cells	2.11015	5.05838	0.1	1000
FXYD5	FXYD domain containing ion transport regulator 5 [Source:HGNC Symbol;Acc:HGNC:4029]	0.000731736	-0.309514	0.844	0.737	1	mg-TAM 1	All other cells	ND1_7.Neftel_2019_10x Myeloid_cells	2.75897	3.7961	0.1	1000
S100A6	S100 calcium binding protein A6 [Source:HGNC Symbol;Acc:HGNC:10496]	0.000847422	-0.687742	0.67	0.603	1	mg-TAM 1	All other cells	ND1_7.Neftel_2019_10x Myeloid_cells	3.18471	6.43401	0.1	1000
MAFF	MAF bZIP transcription factor F [Source:HGNC Symbol;Acc:HGNC:6780]	0.000854682	-0.588468	0.124	0.166	1	mg-TAM 1	All other cells	ND1_7.Neftel_2019_10x Myeloid_cells	0.174805	0.394986	0.1	1000
STMN1	stathmin 1 [Source:HGNC Symbol;Acc:HGNC:6510]	0.000861818	-0.404059	0.446	0.32	1	mg-TAM 1	All other cells	ND1_7.Neftel_2019_10x Myeloid_cells	0.822635	1.28201	0.1	1000
PLIN2	perilipin 2 [Source:HGNC Symbol;Acc:HGNC:248]	0.000866242	-0.993978	0.541	0.506	1	mg-TAM 1	All other cells	ND1_7.Neftel_2019_10x Myeloid_cells	1.80874	5.05734	0.1	1000
KLF4	Kruppel like factor 4 [Source:HGNC Symbol;Acc:HGNC:6348]	0.000990814	-0.782372	0.349	0.391	1	mg-TAM 1	All other cells	ND1_7.Neftel_2019_10x Myeloid_cells	0.827506	1.92813	0.1	1000
SERPINE1	serpin family E member 1 [Source:HGNC Symbol;Acc:HGNC:8583]	0.0011936	-0.67958	0.265	0.239	1	mg-TAM 1	All other cells	ND1_7.Neftel_2019_10x Myeloid_cells	0.724927	1.52762	0.1	1000
ZNF90	zinc finger protein 90 [Source:HGNC Symbol;Acc:HGNC:13165]	0.001339	-0.297995	0.303	0.213	1	mg-TAM 1	All other cells	ND1_7.Neftel_2019_10x Myeloid_cells	0.453826	0.64609	0.1	1000
ZFAND5	zinc finger AN1-type containing 5 [Source:HGNC Symbol;Acc:HGNC:13008]	0.00141344	-0.626536	0.476	0.466	1	mg-TAM 1	All other cells	ND1_7.Neftel_2019_10x Myeloid_cells	0.882855	1.73904	0.1	1000
DMXL2	Dmx like 2 [Source:HGNC Symbol;Acc:HGNC:2938]	0.0014604	-0.360603	0.123	0.124	1	mg-TAM 1	All other cells	ND1_7.Neftel_2019_10x Myeloid_cells	0.133034	0.234216	0.1	1000
TSC22D3	TSC22 domain family member 3 [Source:HGNC Symbol;Acc:HGNC:3051]	0.0016034	-0.477064	0.74	0.705	1	mg-TAM 1	All other cells	ND1_7.Neftel_2019_10x Myeloid_cells	2.88862	4.71568	0.1	1000
HLA-DQA1	major histocompatibility complex, class II, DQ alpha 1 [Source:HGNC Symbol;Acc:HGNC:4942]	0.00167016	-0.599828	0.587	0.575	1	mg-TAM 1	All other cells	ND1_7.Neftel_2019_10x Myeloid_cells	2.68396	4.97184	0.1	1000
HSPA1A	heat shock protein family A (Hsp70) member 1A [Source:HGNC Symbol;Acc:HGNC:5232]	0.00192706	-0.849474	0.512	0.522	1	mg-TAM 1	All other cells	ND1_7.Neftel_2019_10x Myeloid_cells	6.74263	15.9009	0.1	1000
UBC	ubiquitin C [Source:HGNC Symbol;Acc:HGNC:12468]	0.00207418	-0.308464	0.989	0.943	1	mg-TAM 1	All other cells	ND1_7.Neftel_2019_10x Myeloid_cells	12.4717	17.0143	0.1	1000
HSPB1	heat shock protein family B (small) member 1 [Source:HGNC Symbol;Acc:HGNC:5246]	0.0021161	-0.465939	0.853	0.653	1	mg-TAM 1	All other cells	ND1_7.Neftel_2019_10x Myeloid_cells	4.18823	6.73334	0.1	1000
CD48	CD48 molecule [Source:HGNC Symbol;Acc:HGNC:1683]	0.00213382	-0.572026	0.148	0.186	1	mg-TAM 1	All other cells	ND1_7.Neftel_2019_10x Myeloid_cells	0.183408	0.402156	0.1	1000
CCL20	C-C motif chemokine ligand 20 [Source:HGNC Symbol;Acc:HGNC:10619]	0.00221106	-1.04869	0.089	0.102	1	mg-TAM 1	All other cells	ND1_7.Neftel_2019_10x Myeloid_cells	0.26641	0.945696	0.1	1000
PNRC1	proline rich nuclear receptor coactivator 1 [Source:HGNC Symbol;Acc:HGNC:17278]	0.0031772	-0.369171	0.84	0.747	1	mg-TAM 1	All other cells	ND1_7.Neftel_2019_10x Myeloid_cells	3.19443	4.66551	0.1	1000
HNRNPL	heterogeneous nuclear ribonucleoprotein L [Source:HGNC Symbol;Acc:HGNC:5045]	0.00319344	-0.361978	0.149	0.148	1	mg-TAM 1	All other cells	ND1_7.Neftel_2019_10x Myeloid_cells	0.167417	0.284055	0.1	1000
IL10	interleukin 10 [Source:HGNC Symbol;Acc:HGNC:5962]	0.00362571	-0.749241	0.13	0.159	1	mg-TAM 1	All other cells	ND1_7.Neftel_2019_10x Myeloid_cells	0.2287	0.595329	0.1	1000
PLAUR	plasminogen activator, urokinase receptor [Source:HGNC Symbol;Acc:HGNC:9053]	0.00394109	-0.550267	0.684	0.612	1	mg-TAM 1	All other cells	ND1_7.Neftel_2019_10x Myeloid_cells	2.86437	5.03939	0.1	1000
KLHL24	kelch like family member 24 [Source:HGNC Symbol;Acc:HGNC:25947]	0.00410142	-0.28277	0.157	0.136	1	mg-TAM 1	All other cells	ND1_7.Neftel_2019_10x Myeloid_cells	0.17936	0.270655	0.1	1000
STK17B	serine/threonine kinase 17b [Source:HGNC Symbol;Acc:HGNC:11396]	0.0041127	-0.711489	0.198	0.245	1	mg-TAM 1	All other cells	ND1_7.Neftel_2019_10x Myeloid_cells	0.235011	0.582425	0.1	1000
U2AF1	U2 small nuclear RNA auxiliary factor 1 [Source:HGNC Symbol;Acc:HGNC:12453]	0.00422361	-0.555039	0.161	0.186	1	mg-TAM 1	All other cells	ND1_7.Neftel_2019_10x Myeloid_cells	0.253078	0.515066	0.1	1000
BEST1	bestrophin 1 [Source:HGNC Symbol;Acc:HGNC:12703]	0.00424188	-0.43681	0.248	0.206	1	mg-TAM 1	All other cells	ND1_7.Neftel_2019_10x Myeloid_cells	0.29475	0.510979	0.1	1000
NFKBIA	NFKB inhibitor alpha [Source:HGNC Symbol;Acc:HGNC:7797]	0.00424696	-0.447257	0.834	0.765	1	mg-TAM 1	All other cells	ND1_7.Neftel_2019_10x Myeloid_cells	6.25052	9.83232	0.1	1000
MT-ND4L	mitochondrially encoded NADH:ubiquinone oxidoreductase core subunit 4L [Source:HGNC Symbol;Acc:HGNC:7460]	0.00427279	-0.616133	0.621	0.569	1	mg-TAM 1	All other cells	ND1_7.Neftel_2019_10x Myeloid_cells	5.20337	9.72054	0.1	1000
PHLDA1	pleckstrin homology like domain family A member 1 [Source:HGNC Symbol;Acc:HGNC:8933]	0.0044176	-0.733697	0.139	0.191	1	mg-TAM 1	All other cells	ND1_7.Neftel_2019_10x Myeloid_cells	0.248866	0.626606	0.1	1000
FTH1	ferritin heavy chain 1 [Source:HGNC Symbol;Acc:HGNC:3976]	0.00461964	-0.365321	0.997	0.964	1	mg-TAM 1	All other cells	ND1_7.Neftel_2019_10x Myeloid_cells	120.826	174.151	0.1	1000
ATP6V0A1	ATPase H+ transporting V0 subunit a1 [Source:HGNC Symbol;Acc:HGNC:865]	0.00495449	-0.316078	0.185	0.155	1	mg-TAM 1	All other cells	ND1_7.Neftel_2019_10x Myeloid_cells	0.220221	0.339259	0.1	1000
MTRNR2L8	MT-RNR2 like 8 [Source:HGNC Symbol;Acc:HGNC:37165]	0.00503611	-0.854188	0.138	0.173	1	mg-TAM 1	All other cells	ND1_7.Neftel_2019_10x Myeloid_cells	0.276761	0.785186	0.1	1000
IER3	immediate early response 3 [Source:HGNC Symbol;Acc:HGNC:5392]	0.00513958	-0.581426	0.66	0.628	1	mg-TAM 1	All other cells	ND1_7.Neftel_2019_10x Myeloid_cells	3.1323	5.68125	0.1	1000
CLU	clusterin [Source:HGNC Symbol;Acc:HGNC:2095]	0.00566415	-1.00917	0.211	0.249	1	mg-TAM 1	All other cells	ND1_7.Neftel_2019_10x Myeloid_cells	0.446575	1.39943	0.1	1000
MDM4	MDM4 regulator of p53 [Source:HGNC Symbol;Acc:HGNC:6974]	0.00586933	-0.277075	0.242	0.199	1	mg-TAM 1	All other cells	ND1_7.Neftel_2019_10x Myeloid_cells	0.32401	0.459381	0.1	1000
TAGLN2	transgelin 2 [Source:HGNC Symbol;Acc:HGNC:11554]	0.00617422	-0.528479	0.441	0.391	1	mg-TAM 1	All other cells	ND1_7.Neftel_2019_10x Myeloid_cells	0.758509	1.35633	0.1	1000
TIPARP	TCDD inducible poly(ADP-ribose) polymerase [Source:HGNC Symbol;Acc:HGNC:23696]	0.00632379	-0.39632	0.106	0.116	1	mg-TAM 1	All other cells	ND1_7.Neftel_2019_10x Myeloid_cells	0.118568	0.224867	0.1	1000
ZNF331	zinc finger protein 331 [Source:HGNC Symbol;Acc:HGNC:15489]	0.00668806	-0.615784	0.414	0.425	1	mg-TAM 1	All other cells	ND1_7.Neftel_2019_10x Myeloid_cells	1.1784	2.26645	0.1	1000
SLC16A10	solute carrier family 16 member 10 [Source:HGNC Symbol;Acc:HGNC:17027]	0.00703366	-0.631865	0.076	0.11	1	mg-TAM 1	All other cells	ND1_7.Neftel_2019_10x Myeloid_cells	0.12478	0.322838	0.1	1000
PHACTR1	phosphatase and actin regulator 1 [Source:HGNC Symbol;Acc:HGNC:20990]	0.00704787	-0.6993	0.229	0.273	1	mg-TAM 1	All other cells	ND1_7.Neftel_2019_10x Myeloid_cells	0.382899	0.871759	0.1	1000
SPRY1	sprouty RTK signaling antagonist 1 [Source:HGNC Symbol;Acc:HGNC:11269]	0.00725806	-0.306665	0.165	0.128	1	mg-TAM 1	All other cells	ND1_7.Neftel_2019_10x Myeloid_cells	0.258538	0.387213	0.1	1000
NFKBID	NFKB inhibitor delta [Source:HGNC Symbol;Acc:HGNC:15671]	0.00823099	-0.554786	0.297	0.307	1	mg-TAM 1	All other cells	ND1_7.Neftel_2019_10x Myeloid_cells	0.475902	0.902973	0.1	1000
ABL2	ABL proto-oncogene 2, non-receptor tyrosine kinase [Source:HGNC Symbol;Acc:HGNC:77]	0.00835783	-0.675265	0.213	0.236	1	mg-TAM 1	All other cells	ND1_7.Neftel_2019_10x Myeloid_cells	0.27882	0.644213	0.1	1000
PMAIP1	phorbol-12-myristate-13-acetate-induced protein 1 [Source:HGNC Symbol;Acc:HGNC:9108]	0.00877477	-0.744583	0.119	0.158	1	mg-TAM 1	All other cells	ND1_7.Neftel_2019_10x Myeloid_cells	0.178039	0.485429	0.1	1000
CFLAR	CASP8 and FADD like apoptosis regulator [Source:HGNC Symbol;Acc:HGNC:1876]	0.00972094	-0.465894	0.362	0.35	1	mg-TAM 1	All other cells	ND1_7.Neftel_2019_10x Myeloid_cells	0.493768	0.846132	0.1	1000
RASGEF1B	RasGEF domain family member 1B [Source:HGNC Symbol;Acc:HGNC:24881]	0.00975615	-0.658327	0.187	0.224	1	mg-TAM 1	All other cells	ND1_7.Neftel_2019_10x Myeloid_cells	0.248417	0.572987	0.1	1000
ICAM1	intercellular adhesion molecule 1 [Source:HGNC Symbol;Acc:HGNC:5344]	0.011846	-0.58727	0.222	0.232	1	mg-TAM 1	All other cells	ND1_7.Neftel_2019_10x Myeloid_cells	0.305182	0.628951	0.1	1000
ID3	inhibitor of DNA binding 3, HLH protein [Source:HGNC Symbol;Acc:HGNC:5362]	0.0119429	-0.66009	0.095	0.122	1	mg-TAM 1	All other cells	ND1_7.Neftel_2019_10x Myeloid_cells	0.177224	0.436419	0.1	1000
ATG16L2	autophagy related 16 like 2 [Source:HGNC Symbol;Acc:HGNC:25464]	0.0120583	-0.255717	0.234	0.203	1	mg-TAM 1	All other cells	ND1_7.Neftel_2019_10x Myeloid_cells	0.291769	0.405926	0.1	1000
PNPLA8	patatin like phospholipase domain containing 8 [Source:HGNC Symbol;Acc:HGNC:28900]	0.0121348	-0.256019	0.23	0.19	1	mg-TAM 1	All other cells	ND1_7.Neftel_2019_10x Myeloid_cells	0.264757	0.371185	0.1	1000
BAG3	BAG cochaperone 3 [Source:HGNC Symbol;Acc:HGNC:939]	0.0124093	-1.11508	0.118	0.156	1	mg-TAM 1	All other cells	ND1_7.Neftel_2019_10x Myeloid_cells	0.219788	0.875289	0.1	1000
IL1B	interleukin 1 beta [Source:HGNC Symbol;Acc:HGNC:5992]	0.012632	-0.690583	0.484	0.478	1	mg-TAM 1	All other cells	ND1_7.Neftel_2019_10x Myeloid_cells	3.49057	7.06276	0.1	1000
TGIF1	TGFB induced factor homeobox 1 [Source:HGNC Symbol;Acc:HGNC:11776]	0.0131234	-0.563581	0.297	0.306	1	mg-TAM 1	All other cells	ND1_7.Neftel_2019_10x Myeloid_cells	0.463742	0.890468	0.1	1000
FOXO3	forkhead box O3 [Source:HGNC Symbol;Acc:HGNC:3821]	0.0134888	-0.437504	0.174	0.177	1	mg-TAM 1	All other cells	ND1_7.Neftel_2019_10x Myeloid_cells	0.196049	0.358531	0.1	1000
SLC2A3	solute carrier family 2 member 3 [Source:HGNC Symbol;Acc:HGNC:11007]	0.0139973	-0.577934	0.398	0.375	1	mg-TAM 1	All other cells	ND1_7.Neftel_2019_10x Myeloid_cells	0.934576	1.74398	0.1	1000
SDCBP	syndecan binding protein [Source:HGNC Symbol;Acc:HGNC:10662]	0.0141929	-0.308193	0.824	0.726	1	mg-TAM 1	All other cells	ND1_7.Neftel_2019_10x Myeloid_cells	2.74505	3.77201	0.1	1000
IRF7	interferon regulatory factor 7 [Source:HGNC Symbol;Acc:HGNC:6122]	0.0142703	-0.330072	0.322	0.258	1	mg-TAM 1	All other cells	ND1_7.Neftel_2019_10x Myeloid_cells	0.461277	0.680775	0.1	1000
MT1F	metallothionein 1F [Source:HGNC Symbol;Acc:HGNC:7398]	0.0159607	-0.267757	0.17	0.124	1	mg-TAM 1	All other cells	ND1_7.Neftel_2019_10x Myeloid_cells	0.241623	0.346511	0.1	1000
MARCKSL1	MARCKS like 1 [Source:HGNC Symbol;Acc:HGNC:7142]	0.0167589	-0.587412	0.132	0.143	1	mg-TAM 1	All other cells	ND1_7.Neftel_2019_10x Myeloid_cells	0.174728	0.394325	0.1	1000
MYO1G	myosin IG [Source:HGNC Symbol;Acc:HGNC:13880]	0.0168596	-0.444215	0.099	0.123	1	mg-TAM 1	All other cells	ND1_7.Neftel_2019_10x Myeloid_cells	0.113993	0.233673	0.1	1000
LGALS3	galectin 3 [Source:HGNC Symbol;Acc:HGNC:6563]	0.0184686	-0.728943	0.347	0.356	1	mg-TAM 1	All other cells	ND1_7.Neftel_2019_10x Myeloid_cells	0.900064	1.97302	0.1	1000
MGAT1	alpha-1,3-mannosyl-glycoprotein 2-beta-N-acetylglucosaminyltransferase [Source:HGNC Symbol;Acc:HGNC:7044]	0.0188699	-0.438677	0.597	0.542	1	mg-TAM 1	All other cells	ND1_7.Neftel_2019_10x Myeloid_cells	1.19323	1.90536	0.1	1000
ACP5	acid phosphatase 5, tartrate resistant [Source:HGNC Symbol;Acc:HGNC:124]	0.0189595	-0.829519	0.097	0.134	1	mg-TAM 1	All other cells	ND1_7.Neftel_2019_10x Myeloid_cells	0.111039	0.383746	0.1	1000
OSER1	oxidative stress responsive serine rich 1 [Source:HGNC Symbol;Acc:HGNC:16105]	0.0191022	-0.310204	0.276	0.22	1	mg-TAM 1	All other cells	ND1_7.Neftel_2019_10x Myeloid_cells	0.334225	0.492154	0.1	1000
NLRP3	NLR family pyrin domain containing 3 [Source:HGNC Symbol;Acc:HGNC:16400]	0.0205301	-0.6277	0.235	0.252	1	mg-TAM 1	All other cells	ND1_7.Neftel_2019_10x Myeloid_cells	0.332495	0.710191	0.1	1000
HLA-DQB2	major histocompatibility complex, class II, DQ beta 2 [Source:HGNC Symbol;Acc:HGNC:4945]	0.0224225	-0.793103	0.09	0.125	1	mg-TAM 1	All other cells	ND1_7.Neftel_2019_10x Myeloid_cells	0.132456	0.413785	0.1	1000
VTI1A	vesicle transport through interaction with t-SNAREs 1A [Source:HGNC Symbol;Acc:HGNC:17792]	0.0229286	-0.259863	0.117	0.088	1	mg-TAM 1	All other cells	ND1_7.Neftel_2019_10x Myeloid_cells	0.126291	0.193444	0.1	1000
CCL3	C-C motif chemokine ligand 3 [Source:HGNC Symbol;Acc:HGNC:10627]	0.0229378	-0.6032	0.767	0.762	1	mg-TAM 1	All other cells	ND1_7.Neftel_2019_10x Myeloid_cells	25.2752	46.2848	0.1	1000
NFIL3	nuclear factor, interleukin 3 regulated [Source:HGNC Symbol;Acc:HGNC:7787]	0.0238069	-0.553853	0.1	0.136	1	mg-TAM 1	All other cells	ND1_7.Neftel_2019_10x Myeloid_cells	0.114715	0.273592	0.1	1000
GLUL	glutamate-ammonia ligase [Source:HGNC Symbol;Acc:HGNC:4341]	0.026236	-0.253289	0.932	0.832	1	mg-TAM 1	All other cells	ND1_7.Neftel_2019_10x Myeloid_cells	6.23954	8.06695	0.1	1000
PRDM1	PR/SET domain 1 [Source:HGNC Symbol;Acc:HGNC:9346]	0.0267861	-0.711008	0.169	0.207	1	mg-TAM 1	All other cells	ND1_7.Neftel_2019_10x Myeloid_cells	0.217446	0.546334	0.1	1000
AZI2	5-azacytidine induced 2 [Source:HGNC Symbol;Acc:HGNC:24002]	0.0268856	-0.669064	0.215	0.228	1	mg-TAM 1	All other cells	ND1_7.Neftel_2019_10x Myeloid_cells	0.262576	0.607897	0.1	1000
BCAS2	BCAS2 pre-mRNA processing factor [Source:HGNC Symbol;Acc:HGNC:975]	0.027823	-0.323562	0.385	0.299	1	mg-TAM 1	All other cells	ND1_7.Neftel_2019_10x Myeloid_cells	0.585141	0.846893	0.1	1000
MT1X	metallothionein 1X [Source:HGNC Symbol;Acc:HGNC:7405]	0.0278742	-1.30499	0.444	0.345	1	mg-TAM 1	All other cells	ND1_7.Neftel_2019_10x Myeloid_cells	1.01995	4.03001	0.1	1000
HLA-DQB1	major histocompatibility complex, class II, DQ beta 1 [Source:HGNC Symbol;Acc:HGNC:4944]	0.0281467	-0.361465	0.907	0.788	1	mg-TAM 1	All other cells	ND1_7.Neftel_2019_10x Myeloid_cells	4.76436	6.88245	0.1	1000
WSB1	WD repeat and SOCS box containing 1 [Source:HGNC Symbol;Acc:HGNC:19221]	0.0300011	-0.469918	0.662	0.604	1	mg-TAM 1	All other cells	ND1_7.Neftel_2019_10x Myeloid_cells	1.3403	2.20428	0.1	1000
DUSP1	dual specificity phosphatase 1 [Source:HGNC Symbol;Acc:HGNC:3064]	0.0315523	-0.307457	0.883	0.859	1	mg-TAM 1	All other cells	ND1_7.Neftel_2019_10x Myeloid_cells	20.6759	28.1544	0.1	1000
MXD1	MAX dimerization protein 1 [Source:HGNC Symbol;Acc:HGNC:6761]	0.03311	-0.591913	0.129	0.162	1	mg-TAM 1	All other cells	ND1_7.Neftel_2019_10x Myeloid_cells	0.171364	0.390474	0.1	1000
HBEGF	heparin binding EGF like growth factor [Source:HGNC Symbol;Acc:HGNC:3059]	0.0340771	-0.523931	0.285	0.31	1	mg-TAM 1	All other cells	ND1_7.Neftel_2019_10x Myeloid_cells	0.752403	1.33941	0.1	1000
S100A4	S100 calcium binding protein A4 [Source:HGNC Symbol;Acc:HGNC:10494]	0.0345029	-0.306231	0.777	0.653	1	mg-TAM 1	All other cells	ND1_7.Neftel_2019_10x Myeloid_cells	6.08367	8.29925	0.1	1000
PER1	period circadian regulator 1 [Source:HGNC Symbol;Acc:HGNC:8845]	0.0346626	-0.606478	0.287	0.308	1	mg-TAM 1	All other cells	ND1_7.Neftel_2019_10x Myeloid_cells	0.370541	0.762953	0.1	1000
SLC43A2	solute carrier family 43 member 2 [Source:HGNC Symbol;Acc:HGNC:23087]	0.0360655	-0.419976	0.3	0.294	1	mg-TAM 1	All other cells	ND1_7.Neftel_2019_10x Myeloid_cells	0.409836	0.675932	0.1	1000
NUMA1	nuclear mitotic apparatus protein 1 [Source:HGNC Symbol;Acc:HGNC:8059]	0.037081	-0.261108	0.179	0.151	1	mg-TAM 1	All other cells	ND1_7.Neftel_2019_10x Myeloid_cells	0.205603	0.296786	0.1	1000
GFAP	glial fibrillary acidic protein [Source:HGNC Symbol;Acc:HGNC:4235]	0.0376514	-0.74423	0.188	0.238	1	mg-TAM 1	All other cells	ND1_7.Neftel_2019_10x Myeloid_cells	0.35698	0.861861	0.1	1000
LILRB2	leukocyte immunoglobulin like receptor B2 [Source:HGNC Symbol;Acc:HGNC:6606]	0.0378936	-0.396187	0.119	0.128	1	mg-TAM 1	All other cells	ND1_7.Neftel_2019_10x Myeloid_cells	0.140033	0.256724	0.1	1000
TNF	tumor necrosis factor [Source:HGNC Symbol;Acc:HGNC:11892]	0.0387306	-0.642751	0.189	0.201	1	mg-TAM 1	All other cells	ND1_7.Neftel_2019_10x Myeloid_cells	0.544575	1.12579	0.1	1000
FOXP1	forkhead box P1 [Source:HGNC Symbol;Acc:HGNC:3823]	0.0388155	-0.560589	0.159	0.175	1	mg-TAM 1	All other cells	ND1_7.Neftel_2019_10x Myeloid_cells	0.205639	0.435388	0.1	1000
JUNB	JunB proto-oncogene, AP-1 transcription factor subunit [Source:HGNC Symbol;Acc:HGNC:6205]	0.039644	-0.328601	0.891	0.83	1	mg-TAM 1	All other cells	ND1_7.Neftel_2019_10x Myeloid_cells	13.8839	19.3239	0.1	1000
TRA2A	transformer 2 alpha homolog [Source:HGNC Symbol;Acc:HGNC:16645]	0.0426508	-0.279466	0.248	0.204	1	mg-TAM 1	All other cells	ND1_7.Neftel_2019_10x Myeloid_cells	0.298683	0.427228	0.1	1000
ADAM17	ADAM metallopeptidase domain 17 [Source:HGNC Symbol;Acc:HGNC:195]	0.0429238	-0.271722	0.265	0.221	1	mg-TAM 1	All other cells	ND1_7.Neftel_2019_10x Myeloid_cells	0.343827	0.4824	0.1	1000
IFI30	IFI30 lysosomal thiol reductase [Source:HGNC Symbol;Acc:HGNC:5398]	0.0431157	-0.410767	0.391	0.358	1	mg-TAM 1	All other cells	ND1_7.Neftel_2019_10x Myeloid_cells	0.727156	1.14733	0.1	1000
IRS2	insulin receptor substrate 2 [Source:HGNC Symbol;Acc:HGNC:6126]	0.0445022	-0.480027	0.306	0.301	1	mg-TAM 1	All other cells	ND1_7.Neftel_2019_10x Myeloid_cells	0.42595	0.749997	0.1	1000
REL	REL proto-oncogene, NF-kB subunit [Source:HGNC Symbol;Acc:HGNC:9954]	0.0461482	-0.500987	0.588	0.523	1	mg-TAM 1	All other cells	ND1_7.Neftel_2019_10x Myeloid_cells	1.10628	1.89078	0.1	1000
JUN	Jun proto-oncogene, AP-1 transcription factor subunit [Source:HGNC Symbol;Acc:HGNC:6204]	0.0479338	-0.624849	0.738	0.72	1	mg-TAM 1	All other cells	ND1_7.Neftel_2019_10x Myeloid_cells	7.96116	14.958	0.1	1000
RNF144B	ring finger protein 144B [Source:HGNC Symbol;Acc:HGNC:21578]	0.0508278	-0.677794	0.221	0.238	1	mg-TAM 1	All other cells	ND1_7.Neftel_2019_10x Myeloid_cells	0.290026	0.668167	0.1	1000
MX2	MX dynamin like GTPase 2 [Source:HGNC Symbol;Acc:HGNC:7533]	0.0532492	-0.488812	0.168	0.164	1	mg-TAM 1	All other cells	ND1_7.Neftel_2019_10x Myeloid_cells	0.213498	0.411121	0.1	1000
LCP1	lymphocyte cytosolic protein 1 [Source:HGNC Symbol;Acc:HGNC:6528]	0.0540112	-0.296741	0.464	0.382	1	mg-TAM 1	All other cells	ND1_7.Neftel_2019_10x Myeloid_cells	0.705708	0.984053	0.1	1000
TXNIP	thioredoxin interacting protein [Source:HGNC Symbol;Acc:HGNC:16952]	0.0540489	-0.617297	0.55	0.504	1	mg-TAM 1	All other cells	ND1_7.Neftel_2019_10x Myeloid_cells	1.42614	2.72933	0.1	1000
MIR22HG	MIR22 host gene [Source:HGNC Symbol;Acc:HGNC:28219]	0.0543419	-0.308113	0.113	0.098	1	mg-TAM 1	All other cells	ND1_7.Neftel_2019_10x Myeloid_cells	0.11776	0.19634	0.1	1000
MYADM	myeloid associated differentiation marker [Source:HGNC Symbol;Acc:HGNC:7544]	0.0554969	-0.703685	0.158	0.2	1	mg-TAM 1	All other cells	ND1_7.Neftel_2019_10x Myeloid_cells	0.187772	0.48164	0.1	1000
ADIPOR1	adiponectin receptor 1 [Source:HGNC Symbol;Acc:HGNC:24040]	0.0556163	-0.291781	0.408	0.351	1	mg-TAM 1	All other cells	ND1_7.Neftel_2019_10x Myeloid_cells	0.577761	0.807392	0.1	1000
CALCOCO2	calcium binding and coiled-coil domain 2 [Source:HGNC Symbol;Acc:HGNC:29912]	0.0560483	-0.318515	0.173	0.165	1	mg-TAM 1	All other cells	ND1_7.Neftel_2019_10x Myeloid_cells	0.200939	0.313816	0.1	1000
HMGB2	high mobility group box 2 [Source:HGNC Symbol;Acc:HGNC:5000]	0.0564869	-0.615595	0.486	0.434	1	mg-TAM 1	All other cells	ND1_7.Neftel_2019_10x Myeloid_cells	0.863817	1.68379	0.1	1000
CHMP1B	charged multivesicular body protein 1B [Source:HGNC Symbol;Acc:HGNC:24287]	0.0618248	-0.637929	0.423	0.41	1	mg-TAM 1	All other cells	ND1_7.Neftel_2019_10x Myeloid_cells	0.827717	1.65576	0.1	1000
MAT2A	methionine adenosyltransferase 2A [Source:HGNC Symbol;Acc:HGNC:6904]	0.0630132	-0.35864	0.491	0.415	1	mg-TAM 1	All other cells	ND1_7.Neftel_2019_10x Myeloid_cells	0.873242	1.29308	0.1	1000
B3GNT5	UDP-GlcNAc:betaGal beta-1,3-N-acetylglucosaminyltransferase 5 [Source:HGNC Symbol;Acc:HGNC:15684]	0.0630912	-0.52458	0.27	0.269	1	mg-TAM 1	All other cells	ND1_7.Neftel_2019_10x Myeloid_cells	0.38234	0.715033	0.1	1000
IER5	immediate early response 5 [Source:HGNC Symbol;Acc:HGNC:5393]	0.0634628	-0.72666	0.293	0.307	1	mg-TAM 1	All other cells	ND1_7.Neftel_2019_10x Myeloid_cells	0.466469	1.07155	0.1	1000
INTS6	integrator complex subunit 6 [Source:HGNC Symbol;Acc:HGNC:14879]	0.0640524	-0.306361	0.124	0.113	1	mg-TAM 1	All other cells	ND1_7.Neftel_2019_10x Myeloid_cells	0.147321	0.235979	0.1	1000
SYAP1	synapse associated protein 1 [Source:HGNC Symbol;Acc:HGNC:16273]	0.0649389	-0.287802	0.37	0.305	1	mg-TAM 1	All other cells	ND1_7.Neftel_2019_10x Myeloid_cells	0.542983	0.757413	0.1	1000
CLEC2B	C-type lectin domain family 2 member B [Source:HGNC Symbol;Acc:HGNC:2053]	0.0660652	-0.411793	0.38	0.374	1	mg-TAM 1	All other cells	ND1_7.Neftel_2019_10x Myeloid_cells	0.777136	1.22406	0.1	1000
FGL2	fibrinogen like 2 [Source:HGNC Symbol;Acc:HGNC:3696]	0.0671356	-0.345098	0.606	0.496	1	mg-TAM 1	All other cells	ND1_7.Neftel_2019_10x Myeloid_cells	1.11698	1.61854	0.1	1000
SGK1	serum/glucocorticoid regulated kinase 1 [Source:HGNC Symbol;Acc:HGNC:10810]	0.0706061	-0.320263	0.84	0.783	1	mg-TAM 1	All other cells	ND1_7.Neftel_2019_10x Myeloid_cells	7.06107	9.7643	0.1	1000
ZMYM2	zinc finger MYM-type containing 2 [Source:HGNC Symbol;Acc:HGNC:12989]	0.0710975	-0.29715	0.172	0.149	1	mg-TAM 1	All other cells	ND1_7.Neftel_2019_10x Myeloid_cells	0.195094	0.297201	0.1	1000
FKBP4	FKBP prolyl isomerase 4 [Source:HGNC Symbol;Acc:HGNC:3720]	0.0718905	-0.25306	0.184	0.156	1	mg-TAM 1	All other cells	ND1_7.Neftel_2019_10x Myeloid_cells	0.224727	0.318236	0.1	1000
ADAM28	ADAM metallopeptidase domain 28 [Source:HGNC Symbol;Acc:HGNC:206]	0.0738416	-0.260723	0.487	0.387	1	mg-TAM 1	All other cells	ND1_7.Neftel_2019_10x Myeloid_cells	0.767109	1.02539	0.1	1000
BRD2	bromodomain containing 2 [Source:HGNC Symbol;Acc:HGNC:1103]	0.074424	-0.440391	0.383	0.354	1	mg-TAM 1	All other cells	ND1_7.Neftel_2019_10x Myeloid_cells	0.547499	0.905771	0.1	1000
EGR2	early growth response 2 [Source:HGNC Symbol;Acc:HGNC:3239]	0.0768117	-0.68323	0.288	0.294	1	mg-TAM 1	All other cells	ND1_7.Neftel_2019_10x Myeloid_cells	0.651972	1.3891	0.1	1000
AKAP13	A-kinase anchoring protein 13 [Source:HGNC Symbol;Acc:HGNC:371]	0.078251	-0.349752	0.516	0.437	1	mg-TAM 1	All other cells	ND1_7.Neftel_2019_10x Myeloid_cells	0.809168	1.18985	0.1	1000
SLC38A2	solute carrier family 38 member 2 [Source:HGNC Symbol;Acc:HGNC:13448]	0.0782649	-0.465185	0.255	0.247	1	mg-TAM 1	All other cells	ND1_7.Neftel_2019_10x Myeloid_cells	0.324093	0.575287	0.1	1000
VMO1	vitelline membrane outer layer 1 homolog [Source:HGNC Symbol;Acc:HGNC:30387]	0.0787569	-0.37687	0.37	0.296	1	mg-TAM 1	All other cells	ND1_7.Neftel_2019_10x Myeloid_cells	0.676489	1.0319	0.1	1000
DDIT4	DNA damage inducible transcript 4 [Source:HGNC Symbol;Acc:HGNC:24944]	0.0793205	-0.403816	0.661	0.58	1	mg-TAM 1	All other cells	ND1_7.Neftel_2019_10x Myeloid_cells	2.56212	3.88661	0.1	1000
FCHO2	FCH and mu domain containing endocytic adaptor 2 [Source:HGNC Symbol;Acc:HGNC:25180]	0.0819934	-0.434025	0.101	0.118	1	mg-TAM 1	All other cells	ND1_7.Neftel_2019_10x Myeloid_cells	0.109781	0.223787	0.1	1000
PCBP2	poly(rC) binding protein 2 [Source:HGNC Symbol;Acc:HGNC:8648]	0.0820032	-0.302443	0.815	0.708	1	mg-TAM 1	All other cells	ND1_7.Neftel_2019_10x Myeloid_cells	2.65475	3.62762	0.1	1000
STAT2	signal transducer and activator of transcription 2 [Source:HGNC Symbol;Acc:HGNC:11363]	0.0851875	-0.33702	0.148	0.131	1	mg-TAM 1	All other cells	ND1_7.Neftel_2019_10x Myeloid_cells	0.16754	0.274761	0.1	1000
KLF10	Kruppel like factor 10 [Source:HGNC Symbol;Acc:HGNC:11810]	0.0855673	-0.580077	0.152	0.185	1	mg-TAM 1	All other cells	ND1_7.Neftel_2019_10x Myeloid_cells	0.193926	0.425003	0.1	1000
BTG2	BTG anti-proliferation factor 2 [Source:HGNC Symbol;Acc:HGNC:1131]	0.0889275	-0.363554	0.7	0.61	1	mg-TAM 1	All other cells	ND1_7.Neftel_2019_10x Myeloid_cells	2.99409	4.35064	0.1	1000
HSPD1	heat shock protein family D (Hsp60) member 1 [Source:HGNC Symbol;Acc:HGNC:5261]	0.0895346	-0.420415	0.594	0.451	1	mg-TAM 1	All other cells	ND1_7.Neftel_2019_10x Myeloid_cells	1.14637	1.79771	0.1	1000
PDGFB	platelet derived growth factor subunit B [Source:HGNC Symbol;Acc:HGNC:8800]	0.091675	-0.252647	0.176	0.143	1	mg-TAM 1	All other cells	ND1_7.Neftel_2019_10x Myeloid_cells	0.218553	0.310114	0.1	1000
SCD	stearoyl-CoA desaturase [Source:HGNC Symbol;Acc:HGNC:10571]	0.0921138	-0.301833	0.187	0.146	1	mg-TAM 1	All other cells	ND1_7.Neftel_2019_10x Myeloid_cells	0.230695	0.347211	0.1	1000
CCL3L3	C-C motif chemokine ligand 3 like 3 [Source:HGNC Symbol;Acc:HGNC:30554]	0.0951645	-0.566533	0.604	0.536	1	mg-TAM 1	All other cells	ND1_7.Neftel_2019_10x Myeloid_cells	10.0452	17.7773	0.1	1000
GBP1	guanylate binding protein 1 [Source:HGNC Symbol;Acc:HGNC:4182]	0.0978213	-0.283472	0.152	0.116	1	mg-TAM 1	All other cells	ND1_7.Neftel_2019_10x Myeloid_cells	0.176264	0.266804	0.1	1000
HSPH1	heat shock protein family H (Hsp110) member 1 [Source:HGNC Symbol;Acc:HGNC:16969]	0.0985725	-0.939527	0.303	0.308	1	mg-TAM 1	All other cells	ND1_7.Neftel_2019_10x Myeloid_cells	0.60386	1.70102	0.1	1000
NDRG1	N-myc downstream regulated 1 [Source:HGNC Symbol;Acc:HGNC:7679]	0.101326	-0.756704	0.115	0.14	1	mg-TAM 1	All other cells	ND1_7.Neftel_2019_10x Myeloid_cells	0.131086	0.3925	0.1	1000
SLC20A1	solute carrier family 20 member 1 [Source:HGNC Symbol;Acc:HGNC:10946]	0.103257	-0.302667	0.131	0.117	1	mg-TAM 1	All other cells	ND1_7.Neftel_2019_10x Myeloid_cells	0.143474	0.229533	0.1	1000
STX16	syntaxin 16 [Source:HGNC Symbol;Acc:HGNC:11431]	0.105183	-0.288263	0.13	0.118	1	mg-TAM 1	All other cells	ND1_7.Neftel_2019_10x Myeloid_cells	0.137728	0.217155	0.1	1000
G0S2	G0/G1 switch 2 [Source:HGNC Symbol;Acc:HGNC:30229]	0.106043	-0.873389	0.192	0.219	1	mg-TAM 1	All other cells	ND1_7.Neftel_2019_10x Myeloid_cells	1.35652	3.3884	0.1	1000
FILIP1L	filamin A interacting protein 1 like [Source:HGNC Symbol;Acc:HGNC:24589]	0.106113	-0.28754	0.165	0.142	1	mg-TAM 1	All other cells	ND1_7.Neftel_2019_10x Myeloid_cells	0.203723	0.304906	0.1	1000
TOB2	transducer of ERBB2, 2 [Source:HGNC Symbol;Acc:HGNC:11980]	0.11103	-0.287053	0.114	0.102	1	mg-TAM 1	All other cells	ND1_7.Neftel_2019_10x Myeloid_cells	0.117579	0.189923	0.1	1000
C9orf72	C9orf72-SMCR8 complex subunit [Source:HGNC Symbol;Acc:HGNC:28337]	0.11119	-0.287978	0.207	0.177	1	mg-TAM 1	All other cells	ND1_7.Neftel_2019_10x Myeloid_cells	0.239076	0.352236	0.1	1000
LRRK2	leucine rich repeat kinase 2 [Source:HGNC Symbol;Acc:HGNC:18618]	0.113211	-0.286927	0.136	0.124	1	mg-TAM 1	All other cells	ND1_7.Neftel_2019_10x Myeloid_cells	0.161793	0.248794	0.1	1000
MAP3K8	mitogen-activated protein kinase kinase kinase 8 [Source:HGNC Symbol;Acc:HGNC:6860]	0.117932	-0.262276	0.549	0.45	1	mg-TAM 1	All other cells	ND1_7.Neftel_2019_10x Myeloid_cells	1.1365	1.50731	0.1	1000
SDC2	syndecan 2 [Source:HGNC Symbol;Acc:HGNC:10659]	0.126906	-0.624604	0.105	0.121	1	mg-TAM 1	All other cells	ND1_7.Neftel_2019_10x Myeloid_cells	0.138605	0.345597	0.1	1000
MERTK	MER proto-oncogene, tyrosine kinase [Source:HGNC Symbol;Acc:HGNC:7027]	0.13012	-0.252611	0.346	0.283	1	mg-TAM 1	All other cells	ND1_7.Neftel_2019_10x Myeloid_cells	0.512152	0.688074	0.1	1000
NUCB2	nucleobindin 2 [Source:HGNC Symbol;Acc:HGNC:8044]	0.130769	-0.433962	0.187	0.155	1	mg-TAM 1	All other cells	ND1_7.Neftel_2019_10x Myeloid_cells	0.224068	0.400153	0.1	1000
DDIT3	DNA damage inducible transcript 3 [Source:HGNC Symbol;Acc:HGNC:2726]	0.130807	-0.606073	0.208	0.22	1	mg-TAM 1	All other cells	ND1_7.Neftel_2019_10x Myeloid_cells	0.293572	0.621503	0.1	1000
TNFAIP8	TNF alpha induced protein 8 [Source:HGNC Symbol;Acc:HGNC:17260]	0.133187	-0.349305	0.13	0.129	1	mg-TAM 1	All other cells	ND1_7.Neftel_2019_10x Myeloid_cells	0.146252	0.249206	0.1	1000
TOB1	transducer of ERBB2, 1 [Source:HGNC Symbol;Acc:HGNC:11979]	0.136268	-0.282542	0.141	0.121	1	mg-TAM 1	All other cells	ND1_7.Neftel_2019_10x Myeloid_cells	0.170844	0.259274	0.1	1000
GADD45G	growth arrest and DNA damage inducible gamma [Source:HGNC Symbol;Acc:HGNC:4097]	0.136342	-0.287532	0.161	0.125	1	mg-TAM 1	All other cells	ND1_7.Neftel_2019_10x Myeloid_cells	0.238336	0.351047	0.1	1000
TCN2	transcobalamin 2 [Source:HGNC Symbol;Acc:HGNC:11653]	0.137624	-0.432984	0.098	0.107	1	mg-TAM 1	All other cells	ND1_7.Neftel_2019_10x Myeloid_cells	0.108265	0.221114	0.1	1000
SMAP2	small ArfGAP2 [Source:HGNC Symbol;Acc:HGNC:25082]	0.139112	-0.260484	0.519	0.438	1	mg-TAM 1	All other cells	ND1_7.Neftel_2019_10x Myeloid_cells	0.883314	1.17591	0.1	1000
CCL4	C-C motif chemokine ligand 4 [Source:HGNC Symbol;Acc:HGNC:10630]	0.141004	-0.727276	0.719	0.667	1	mg-TAM 1	All other cells	ND1_7.Neftel_2019_10x Myeloid_cells	18.0293	37.4175	0.1	1000
ST3GAL1	ST3 beta-galactoside alpha-2,3-sialyltransferase 1 [Source:HGNC Symbol;Acc:HGNC:10862]	0.142031	-0.324429	0.143	0.136	1	mg-TAM 1	All other cells	ND1_7.Neftel_2019_10x Myeloid_cells	0.161924	0.262304	0.1	1000
PTGS2	prostaglandin-endoperoxide synthase 2 [Source:HGNC Symbol;Acc:HGNC:9605]	0.142639	-0.751041	0.126	0.163	1	mg-TAM 1	All other cells	ND1_7.Neftel_2019_10x Myeloid_cells	0.221806	0.581973	0.1	1000
UBALD2	UBA like domain containing 2 [Source:HGNC Symbol;Acc:HGNC:28438]	0.143871	-0.264183	0.169	0.147	1	mg-TAM 1	All other cells	ND1_7.Neftel_2019_10x Myeloid_cells	0.1893	0.276775	0.1	1000
CHKA	choline kinase alpha [Source:HGNC Symbol;Acc:HGNC:1937]	0.144944	-0.32752	0.144	0.133	1	mg-TAM 1	All other cells	ND1_7.Neftel_2019_10x Myeloid_cells	0.157468	0.257243	0.1	1000
HNRNPH1	heterogeneous nuclear ribonucleoprotein H1 [Source:HGNC Symbol;Acc:HGNC:5041]	0.151923	-0.265654	0.433	0.364	1	mg-TAM 1	All other cells	ND1_7.Neftel_2019_10x Myeloid_cells	0.708837	0.954952	0.1	1000
RNU12	RNA, U12 small nuclear [Source:HGNC Symbol;Acc:HGNC:19380]	0.15497	-0.289698	0.112	0.099	1	mg-TAM 1	All other cells	ND1_7.Neftel_2019_10x Myeloid_cells	0.171454	0.262669	0.1	1000
CADM1	cell adhesion molecule 1 [Source:HGNC Symbol;Acc:HGNC:5951]	0.156621	-0.351414	0.228	0.21	1	mg-TAM 1	All other cells	ND1_7.Neftel_2019_10x Myeloid_cells	0.307425	0.478982	0.1	1000
MKNK2	MAPK interacting serine/threonine kinase 2 [Source:HGNC Symbol;Acc:HGNC:7111]	0.156622	-0.363725	0.134	0.132	1	mg-TAM 1	All other cells	ND1_7.Neftel_2019_10x Myeloid_cells	0.150798	0.260818	0.1	1000
MYO5A	myosin VA [Source:HGNC Symbol;Acc:HGNC:7602]	0.162347	-0.291672	0.112	0.113	1	mg-TAM 1	All other cells	ND1_7.Neftel_2019_10x Myeloid_cells	0.118742	0.192823	0.1	1000
LINC-PINT	long intergenic non-protein coding RNA, p53 induced transcript [Source:HGNC Symbol;Acc:HGNC:26885]	0.170013	-0.340242	0.114	0.114	1	mg-TAM 1	All other cells	ND1_7.Neftel_2019_10x Myeloid_cells	0.136026	0.231684	0.1	1000
GCHFR	GTP cyclohydrolase I feedback regulator [Source:HGNC Symbol;Acc:HGNC:4194]	0.174834	-0.372538	0.128	0.129	1	mg-TAM 1	All other cells	ND1_7.Neftel_2019_10x Myeloid_cells	0.158603	0.27534	0.1	1000
INSIG1	insulin induced gene 1 [Source:HGNC Symbol;Acc:HGNC:6083]	0.17537	-0.478683	0.122	0.144	1	mg-TAM 1	All other cells	ND1_7.Neftel_2019_10x Myeloid_cells	0.205443	0.392969	0.1	1000
RBKS	ribokinase [Source:HGNC Symbol;Acc:HGNC:30325]	0.17569	-0.689165	0.097	0.123	1	mg-TAM 1	All other cells	ND1_7.Neftel_2019_10x Myeloid_cells	0.147915	0.393859	0.1	1000
PAPOLG	poly(A) polymerase gamma [Source:HGNC Symbol;Acc:HGNC:14982]	0.177105	-0.284924	0.134	0.113	1	mg-TAM 1	All other cells	ND1_7.Neftel_2019_10x Myeloid_cells	0.149652	0.231953	0.1	1000
ASPH	aspartate beta-hydroxylase [Source:HGNC Symbol;Acc:HGNC:757]	0.186106	-0.394932	0.153	0.148	1	mg-TAM 1	All other cells	ND1_7.Neftel_2019_10x Myeloid_cells	0.168256	0.298168	0.1	1000
JDP2	Jun dimerization protein 2 [Source:HGNC Symbol;Acc:HGNC:17546]	0.187765	-0.298009	0.211	0.183	1	mg-TAM 1	All other cells	ND1_7.Neftel_2019_10x Myeloid_cells	0.252903	0.375422	0.1	1000
GPNMB	glycoprotein nmb [Source:HGNC Symbol;Acc:HGNC:4462]	0.190169	-0.489926	0.436	0.395	1	mg-TAM 1	All other cells	ND1_7.Neftel_2019_10x Myeloid_cells	1.35257	2.27088	0.1	1000
RIPK2	receptor interacting serine/threonine kinase 2 [Source:HGNC Symbol;Acc:HGNC:10020]	0.191611	-0.565837	0.16	0.181	1	mg-TAM 1	All other cells	ND1_7.Neftel_2019_10x Myeloid_cells	0.174165	0.382783	0.1	1000
BCL2	BCL2 apoptosis regulator [Source:HGNC Symbol;Acc:HGNC:990]	0.196617	-0.349802	0.098	0.101	1	mg-TAM 1	All other cells	ND1_7.Neftel_2019_10x Myeloid_cells	0.108356	0.195613	0.1	1000
SAP30	Sin3A associated protein 30 [Source:HGNC Symbol;Acc:HGNC:10532]	0.198116	-0.359488	0.175	0.171	1	mg-TAM 1	All other cells	ND1_7.Neftel_2019_10x Myeloid_cells	0.196994	0.325472	0.1	1000
CYTH1	cytohesin 1 [Source:HGNC Symbol;Acc:HGNC:9501]	0.200191	-0.35222	0.216	0.204	1	mg-TAM 1	All other cells	ND1_7.Neftel_2019_10x Myeloid_cells	0.256276	0.406703	0.1	1000
HEXIM1	HEXIM P-TEFb complex subunit 1 [Source:HGNC Symbol;Acc:HGNC:24953]	0.204479	-0.376583	0.102	0.1	1	mg-TAM 1	All other cells	ND1_7.Neftel_2019_10x Myeloid_cells	0.109208	0.204878	0.1	1000
ZFP36L2	ZFP36 ring finger protein like 2 [Source:HGNC Symbol;Acc:HGNC:1108]	0.207162	-0.411633	0.845	0.757	1	mg-TAM 1	All other cells	ND1_7.Neftel_2019_10x Myeloid_cells	4.73193	7.19274	0.1	1000
TRA2B	transformer 2 beta homolog [Source:HGNC Symbol;Acc:HGNC:10781]	0.207576	-0.388893	0.551	0.479	1	mg-TAM 1	All other cells	ND1_7.Neftel_2019_10x Myeloid_cells	0.950476	1.44982	0.1	1000
CHD1	chromodomain helicase DNA binding protein 1 [Source:HGNC Symbol;Acc:HGNC:1915]	0.209346	-0.316493	0.34	0.286	1	mg-TAM 1	All other cells	ND1_7.Neftel_2019_10x Myeloid_cells	0.439787	0.640754	0.1	1000
BNIP3L	BCL2 interacting protein 3 like [Source:HGNC Symbol;Acc:HGNC:1085]	0.210037	-0.423336	0.59	0.489	1	mg-TAM 1	All other cells	ND1_7.Neftel_2019_10x Myeloid_cells	1.08542	1.71019	0.1	1000
FGR	FGR proto-oncogene, Src family tyrosine kinase [Source:HGNC Symbol;Acc:HGNC:3697]	0.21737	-0.34754	0.225	0.214	1	mg-TAM 1	All other cells	ND1_7.Neftel_2019_10x Myeloid_cells	0.29439	0.45829	0.1	1000
TNFRSF14	TNF receptor superfamily member 14 [Source:HGNC Symbol;Acc:HGNC:11912]	0.219532	-0.368998	0.227	0.216	1	mg-TAM 1	All other cells	ND1_7.Neftel_2019_10x Myeloid_cells	0.282276	0.45288	0.1	1000
ACTN1	actinin alpha 1 [Source:HGNC Symbol;Acc:HGNC:163]	0.221876	-0.307594	0.119	0.127	1	mg-TAM 1	All other cells	ND1_7.Neftel_2019_10x Myeloid_cells	0.133427	0.217495	0.1	1000
ZNF267	zinc finger protein 267 [Source:HGNC Symbol;Acc:HGNC:13060]	0.222553	-0.28854	0.175	0.152	1	mg-TAM 1	All other cells	ND1_7.Neftel_2019_10x Myeloid_cells	0.208235	0.311333	0.1	1000
RBM39	RNA binding motif protein 39 [Source:HGNC Symbol;Acc:HGNC:15923]	0.225771	-0.265203	0.704	0.582	1	mg-TAM 1	All other cells	ND1_7.Neftel_2019_10x Myeloid_cells	1.39166	1.84467	0.1	1000
GABARAP	GABA type A receptor-associated protein [Source:HGNC Symbol;Acc:HGNC:4067]	0.231374	-0.388258	0.502	0.475	1	mg-TAM 1	All other cells	ND1_7.Neftel_2019_10x Myeloid_cells	1.94337	2.91277	0.1	1000
POLD4	DNA polymerase delta 4, accessory subunit [Source:HGNC Symbol;Acc:HGNC:14106]	0.231887	-0.281513	0.362	0.357	1	mg-TAM 1	All other cells	ND1_7.Neftel_2019_10x Myeloid_cells	0.805817	1.10033	0.1	1000
XAF1	XIAP associated factor 1 [Source:HGNC Symbol;Acc:HGNC:30932]	0.231941	-0.332717	0.223	0.196	1	mg-TAM 1	All other cells	ND1_7.Neftel_2019_10x Myeloid_cells	0.301415	0.459874	0.1	1000
JARID2	jumonji and AT-rich interaction domain containing 2 [Source:HGNC Symbol;Acc:HGNC:6196]	0.233041	-0.349037	0.112	0.108	1	mg-TAM 1	All other cells	ND1_7.Neftel_2019_10x Myeloid_cells	0.114497	0.204093	0.1	1000
OSM	oncostatin M [Source:HGNC Symbol;Acc:HGNC:8506]	0.233098	-0.437542	0.283	0.28	1	mg-TAM 1	All other cells	ND1_7.Neftel_2019_10x Myeloid_cells	0.985242	1.58093	0.1	1000
MBP	myelin basic protein [Source:HGNC Symbol;Acc:HGNC:6925]	0.234192	-0.43174	0.407	0.319	1	mg-TAM 1	All other cells	ND1_7.Neftel_2019_10x Myeloid_cells	0.656121	1.06438	0.1	1000
SUN2	Sad1 and UNC84 domain containing 2 [Source:HGNC Symbol;Acc:HGNC:14210]	0.234379	-0.251519	0.155	0.134	1	mg-TAM 1	All other cells	ND1_7.Neftel_2019_10x Myeloid_cells	0.168479	0.245258	0.1	1000
INF2	inverted formin 2 [Source:HGNC Symbol;Acc:HGNC:23791]	0.240026	-0.273654	0.101	0.093	1	mg-TAM 1	All other cells	ND1_7.Neftel_2019_10x Myeloid_cells	0.109768	0.175795	0.1	1000
KYNU	kynureninase [Source:HGNC Symbol;Acc:HGNC:6469]	0.243014	-0.307009	0.247	0.203	1	mg-TAM 1	All other cells	ND1_7.Neftel_2019_10x Myeloid_cells	0.293485	0.434885	0.1	1000
PSME4	proteasome activator subunit 4 [Source:HGNC Symbol;Acc:HGNC:20635]	0.243708	-0.285877	0.147	0.134	1	mg-TAM 1	All other cells	ND1_7.Neftel_2019_10x Myeloid_cells	0.160999	0.247371	0.1	1000
IFIT3	interferon induced protein with tetratricopeptide repeats 3 [Source:HGNC Symbol;Acc:HGNC:5411]	0.245538	-0.60961	0.167	0.153	1	mg-TAM 1	All other cells	ND1_7.Neftel_2019_10x Myeloid_cells	0.272238	0.584811	0.1	1000
TSC22D2	TSC22 domain family member 2 [Source:HGNC Symbol;Acc:HGNC:29095]	0.248617	-0.480342	0.157	0.162	1	mg-TAM 1	All other cells	ND1_7.Neftel_2019_10x Myeloid_cells	0.192585	0.373001	0.1	1000
DNAJB4	DnaJ heat shock protein family (Hsp40) member B4 [Source:HGNC Symbol;Acc:HGNC:14886]	0.250956	-0.642287	0.085	0.105	1	mg-TAM 1	All other cells	ND1_7.Neftel_2019_10x Myeloid_cells	0.104612	0.288932	0.1	1000
CCL2	C-C motif chemokine ligand 2 [Source:HGNC Symbol;Acc:HGNC:10618]	0.25281	-0.476208	0.168	0.15	1	mg-TAM 1	All other cells	ND1_7.Neftel_2019_10x Myeloid_cells	1.06222	1.77113	0.1	1000
UPP1	uridine phosphorylase 1 [Source:HGNC Symbol;Acc:HGNC:12576]	0.255112	-0.426237	0.341	0.274	1	mg-TAM 1	All other cells	ND1_7.Neftel_2019_10x Myeloid_cells	0.489667	0.803065	0.1	1000
TCOF1	treacle ribosome biogenesis factor 1 [Source:HGNC Symbol;Acc:HGNC:11654]	0.255289	-0.530763	0.136	0.133	1	mg-TAM 1	All other cells	ND1_7.Neftel_2019_10x Myeloid_cells	0.160597	0.343075	0.1	1000
NAF1	nuclear assembly factor 1 ribonucleoprotein [Source:HGNC Symbol;Acc:HGNC:25126]	0.256944	-0.341627	0.128	0.118	1	mg-TAM 1	All other cells	ND1_7.Neftel_2019_10x Myeloid_cells	0.162654	0.269616	0.1	1000
MANBA	mannosidase beta [Source:HGNC Symbol;Acc:HGNC:6831]	0.261445	-0.38589	0.262	0.243	1	mg-TAM 1	All other cells	ND1_7.Neftel_2019_10x Myeloid_cells	0.331273	0.534369	0.1	1000
IVNS1ABP	influenza virus NS1A binding protein [Source:HGNC Symbol;Acc:HGNC:16951]	0.263204	-0.488235	0.247	0.242	1	mg-TAM 1	All other cells	ND1_7.Neftel_2019_10x Myeloid_cells	0.297893	0.548342	0.1	1000
PDK4	pyruvate dehydrogenase kinase 4 [Source:HGNC Symbol;Acc:HGNC:8812]	0.263973	-0.274874	0.463	0.379	1	mg-TAM 1	All other cells	ND1_7.Neftel_2019_10x Myeloid_cells	1.505	2.01276	0.1	1000
B4GALT1	beta-1,4-galactosyltransferase 1 [Source:HGNC Symbol;Acc:HGNC:924]	0.269396	-0.430036	0.298	0.292	1	mg-TAM 1	All other cells	ND1_7.Neftel_2019_10x Myeloid_cells	0.450919	0.746935	0.1	1000
PHIP	pleckstrin homology domain interacting protein [Source:HGNC Symbol;Acc:HGNC:15673]	0.272037	-0.265038	0.299	0.247	1	mg-TAM 1	All other cells	ND1_7.Neftel_2019_10x Myeloid_cells	0.370812	0.513695	0.1	1000
CCL4L2	C-C motif chemokine ligand 4 like 2 [Source:HGNC Symbol;Acc:HGNC:24066]	0.274894	-0.549408	0.625	0.558	1	mg-TAM 1	All other cells	ND1_7.Neftel_2019_10x Myeloid_cells	13.6289	23.6816	0.1	1000
DUSP10	dual specificity phosphatase 10 [Source:HGNC Symbol;Acc:HGNC:3065]	0.275827	-0.319804	0.114	0.109	1	mg-TAM 1	All other cells	ND1_7.Neftel_2019_10x Myeloid_cells	0.127359	0.21304	0.1	1000
TTYH3	tweety family member 3 [Source:HGNC Symbol;Acc:HGNC:22222]	0.277031	-0.354393	0.196	0.186	1	mg-TAM 1	All other cells	ND1_7.Neftel_2019_10x Myeloid_cells	0.245034	0.391783	0.1	1000
PCF11	PCF11 cleavage and polyadenylation factor subunit [Source:HGNC Symbol;Acc:HGNC:30097]	0.278353	-0.282215	0.273	0.223	1	mg-TAM 1	All other cells	ND1_7.Neftel_2019_10x Myeloid_cells	0.33889	0.481997	0.1	1000
MIF	macrophage migration inhibitory factor [Source:HGNC Symbol;Acc:HGNC:7097]	0.278393	-0.454866	0.715	0.595	1	mg-TAM 1	All other cells	ND1_7.Neftel_2019_10x Myeloid_cells	2.50056	3.99838	0.1	1000
NXF1	nuclear RNA export factor 1 [Source:HGNC Symbol;Acc:HGNC:8071]	0.280245	-0.363556	0.151	0.14	1	mg-TAM 1	All other cells	ND1_7.Neftel_2019_10x Myeloid_cells	0.172963	0.292639	0.1	1000
SFMBT2	Scm like with four mbt domains 2 [Source:HGNC Symbol;Acc:HGNC:20256]	0.281384	-0.314279	0.284	0.237	1	mg-TAM 1	All other cells	ND1_7.Neftel_2019_10x Myeloid_cells	0.378971	0.555841	0.1	1000
MIDN	midnolin [Source:HGNC Symbol;Acc:HGNC:16298]	0.284628	-0.418732	0.252	0.236	1	mg-TAM 1	All other cells	ND1_7.Neftel_2019_10x Myeloid_cells	0.326437	0.548198	0.1	1000
STK10	serine/threonine kinase 10 [Source:HGNC Symbol;Acc:HGNC:11388]	0.287051	-0.340068	0.127	0.118	1	mg-TAM 1	All other cells	ND1_7.Neftel_2019_10x Myeloid_cells	0.139222	0.236118	0.1	1000
DUSP2	dual specificity phosphatase 2 [Source:HGNC Symbol;Acc:HGNC:3068]	0.287529	-0.692525	0.21	0.241	1	mg-TAM 1	All other cells	ND1_7.Neftel_2019_10x Myeloid_cells	0.554474	1.20813	0.1	1000
CLIC4	chloride intracellular channel 4 [Source:HGNC Symbol;Acc:HGNC:13518]	0.288502	-0.386569	0.086	0.101	1	mg-TAM 1	All other cells	ND1_7.Neftel_2019_10x Myeloid_cells	0.0963739	0.189047	0.1	1000
CLK1	CDC like kinase 1 [Source:HGNC Symbol;Acc:HGNC:2068]	0.301713	-0.578057	0.345	0.353	1	mg-TAM 1	All other cells	ND1_7.Neftel_2019_10x Myeloid_cells	0.490697	0.95296	0.1	1000
EGR3	early growth response 3 [Source:HGNC Symbol;Acc:HGNC:3240]	0.303033	-0.524203	0.208	0.21	1	mg-TAM 1	All other cells	ND1_7.Neftel_2019_10x Myeloid_cells	0.335093	0.63492	0.1	1000
ANKRD10	ankyrin repeat domain 10 [Source:HGNC Symbol;Acc:HGNC:20265]	0.309707	-0.280043	0.302	0.251	1	mg-TAM 1	All other cells	ND1_7.Neftel_2019_10x Myeloid_cells	0.387988	0.545699	0.1	1000
RAPGEF1	Rap guanine nucleotide exchange factor 1 [Source:HGNC Symbol;Acc:HGNC:4568]	0.312438	-0.35447	0.21	0.194	1	mg-TAM 1	All other cells	ND1_7.Neftel_2019_10x Myeloid_cells	0.245873	0.393015	0.1	1000
PRMT9	protein arginine methyltransferase 9 [Source:HGNC Symbol;Acc:HGNC:25099]	0.316111	-0.418382	0.101	0.112	1	mg-TAM 1	All other cells	ND1_7.Neftel_2019_10x Myeloid_cells	0.121537	0.236626	0.1	1000
ARID5B	AT-rich interaction domain 5B [Source:HGNC Symbol;Acc:HGNC:17362]	0.317276	-0.312736	0.301	0.229	1	mg-TAM 1	All other cells	ND1_7.Neftel_2019_10x Myeloid_cells	0.459861	0.665419	0.1	1000
RGCC	regulator of cell cycle [Source:HGNC Symbol;Acc:HGNC:20369]	0.319732	-0.380976	0.31	0.283	1	mg-TAM 1	All other cells	ND1_7.Neftel_2019_10x Myeloid_cells	1.66742	2.487	0.1	1000
ACSL1	acyl-CoA synthetase long chain family member 1 [Source:HGNC Symbol;Acc:HGNC:3569]	0.329022	-0.315503	0.459	0.367	1	mg-TAM 1	All other cells	ND1_7.Neftel_2019_10x Myeloid_cells	0.829522	1.17433	0.1	1000
ELL2	elongation factor for RNA polymerase II 2 [Source:HGNC Symbol;Acc:HGNC:17064]	0.32944	-0.502349	0.434	0.397	1	mg-TAM 1	All other cells	ND1_7.Neftel_2019_10x Myeloid_cells	0.702712	1.22656	0.1	1000
PTK2B	protein tyrosine kinase 2 beta [Source:HGNC Symbol;Acc:HGNC:9612]	0.331646	-0.453025	0.106	0.124	1	mg-TAM 1	All other cells	ND1_7.Neftel_2019_10x Myeloid_cells	0.117665	0.242402	0.1	1000
YPEL5	yippee like 5 [Source:HGNC Symbol;Acc:HGNC:18329]	0.33508	-0.446408	0.418	0.373	1	mg-TAM 1	All other cells	ND1_7.Neftel_2019_10x Myeloid_cells	0.624631	1.03237	0.1	1000
FCGR2A	Fc fragment of IgG receptor IIa [Source:HGNC Symbol;Acc:HGNC:3616]	0.337909	-0.255327	0.777	0.634	1	mg-TAM 1	All other cells	ND1_7.Neftel_2019_10x Myeloid_cells	2.01166	2.6259	0.1	1000
DNAJA1	DnaJ heat shock protein family (Hsp40) member A1 [Source:HGNC Symbol;Acc:HGNC:5229]	0.338986	-0.482229	0.532	0.45	1	mg-TAM 1	All other cells	ND1_7.Neftel_2019_10x Myeloid_cells	0.928678	1.56613	0.1	1000
EPB41L3	erythrocyte membrane protein band 4.1 like 3 [Source:HGNC Symbol;Acc:HGNC:3380]	0.345859	-0.250766	0.271	0.22	1	mg-TAM 1	All other cells	ND1_7.Neftel_2019_10x Myeloid_cells	0.331817	0.454889	0.1	1000
PRNP	prion protein [Source:HGNC Symbol;Acc:HGNC:9449]	0.349159	-0.272286	0.362	0.308	1	mg-TAM 1	All other cells	ND1_7.Neftel_2019_10x Myeloid_cells	0.51048	0.701537	0.1	1000
HK2	hexokinase 2 [Source:HGNC Symbol;Acc:HGNC:4923]	0.349465	-0.656499	0.164	0.154	1	mg-TAM 1	All other cells	ND1_7.Neftel_2019_10x Myeloid_cells	0.194352	0.46752	0.1	1000
CREBRF	CREB3 regulatory factor [Source:HGNC Symbol;Acc:HGNC:24050]	0.349792	-0.36885	0.18	0.175	1	mg-TAM 1	All other cells	ND1_7.Neftel_2019_10x Myeloid_cells	0.214811	0.355239	0.1	1000
CKS2	CDC28 protein kinase regulatory subunit 2 [Source:HGNC Symbol;Acc:HGNC:2000]	0.352953	-0.522371	0.302	0.273	1	mg-TAM 1	All other cells	ND1_7.Neftel_2019_10x Myeloid_cells	0.513932	0.935102	0.1	1000
SNAPC1	small nuclear RNA activating complex polypeptide 1 [Source:HGNC Symbol;Acc:HGNC:11134]	0.354219	-0.356292	0.116	0.109	1	mg-TAM 1	All other cells	ND1_7.Neftel_2019_10x Myeloid_cells	0.135478	0.236268	0.1	1000
TSPAN4	tetraspanin 4 [Source:HGNC Symbol;Acc:HGNC:11859]	0.354695	-0.354626	0.108	0.11	1	mg-TAM 1	All other cells	ND1_7.Neftel_2019_10x Myeloid_cells	0.13336	0.232689	0.1	1000
RHOB	ras homolog family member B [Source:HGNC Symbol;Acc:HGNC:668]	0.354806	-0.550103	0.742	0.665	1	mg-TAM 1	All other cells	ND1_7.Neftel_2019_10x Myeloid_cells	6.30339	10.9998	0.1	1000
GNA13	G protein subunit alpha 13 [Source:HGNC Symbol;Acc:HGNC:4381]	0.355668	-0.487012	0.334	0.319	1	mg-TAM 1	All other cells	ND1_7.Neftel_2019_10x Myeloid_cells	0.456903	0.806329	0.1	1000
MT1G	metallothionein 1G [Source:HGNC Symbol;Acc:HGNC:7399]	0.357496	-2.20843	0.116	0.105	1	mg-TAM 1	All other cells	ND1_7.Neftel_2019_10x Myeloid_cells	0.187539	2.51702	0.1	1000
SMC4	structural maintenance of chromosomes 4 [Source:HGNC Symbol;Acc:HGNC:14013]	0.359313	-0.331758	0.109	0.106	1	mg-TAM 1	All other cells	ND1_7.Neftel_2019_10x Myeloid_cells	0.116541	0.201732	0.1	1000
IFRD1	interferon related developmental regulator 1 [Source:HGNC Symbol;Acc:HGNC:5456]	0.363281	-0.465353	0.359	0.345	1	mg-TAM 1	All other cells	ND1_7.Neftel_2019_10x Myeloid_cells	0.676356	1.13641	0.1	1000
DENND4C	DENN domain containing 4C [Source:HGNC Symbol;Acc:HGNC:26079]	0.365434	-0.28129	0.113	0.101	1	mg-TAM 1	All other cells	ND1_7.Neftel_2019_10x Myeloid_cells	0.120499	0.192125	0.1	1000
ANKRD37	ankyrin repeat domain 37 [Source:HGNC Symbol;Acc:HGNC:29593]	0.368974	-0.66885	0.118	0.147	1	mg-TAM 1	All other cells	ND1_7.Neftel_2019_10x Myeloid_cells	0.153102	0.394053	0.1	1000
ATP13A3	ATPase 13A3 [Source:HGNC Symbol;Acc:HGNC:24113]	0.376692	-0.301102	0.172	0.153	1	mg-TAM 1	All other cells	ND1_7.Neftel_2019_10x Myeloid_cells	0.191197	0.293509	0.1	1000
CHPT1	choline phosphotransferase 1 [Source:HGNC Symbol;Acc:HGNC:17852]	0.380734	-0.40814	0.15	0.154	1	mg-TAM 1	All other cells	ND1_7.Neftel_2019_10x Myeloid_cells	0.16394	0.29697	0.1	1000
STT3B	STT3 oligosaccharyltransferase complex catalytic subunit B [Source:HGNC Symbol;Acc:HGNC:30611]	0.385507	-0.264258	0.16	0.142	1	mg-TAM 1	All other cells	ND1_7.Neftel_2019_10x Myeloid_cells	0.172736	0.255229	0.1	1000
FNBP1	formin binding protein 1 [Source:HGNC Symbol;Acc:HGNC:17069]	0.3875	-0.260812	0.288	0.238	1	mg-TAM 1	All other cells	ND1_7.Neftel_2019_10x Myeloid_cells	0.341007	0.472419	0.1	1000
INPPL1	inositol polyphosphate phosphatase like 1 [Source:HGNC Symbol;Acc:HGNC:6080]	0.388363	-0.320843	0.124	0.116	1	mg-TAM 1	All other cells	ND1_7.Neftel_2019_10x Myeloid_cells	0.13107	0.218481	0.1	1000
ZMYND8	zinc finger MYND-type containing 8 [Source:HGNC Symbol;Acc:HGNC:9397]	0.390739	-0.250557	0.111	0.103	1	mg-TAM 1	All other cells	ND1_7.Neftel_2019_10x Myeloid_cells	0.125703	0.189969	0.1	1000
CYTIP	cytohesin 1 interacting protein [Source:HGNC Symbol;Acc:HGNC:9506]	0.394322	-0.486415	0.258	0.244	1	mg-TAM 1	All other cells	ND1_7.Neftel_2019_10x Myeloid_cells	0.333319	0.604783	0.1	1000
SQSTM1	sequestosome 1 [Source:NCBI gene (formerly Entrezgene);Acc:8878]	0.39546	-0.38777	0.618	0.529	1	mg-TAM 1	All other cells	ND1_7.Neftel_2019_10x Myeloid_cells	1.34097	2.02355	0.1	1000
PABPN1	poly(A) binding protein nuclear 1 [Source:HGNC Symbol;Acc:HGNC:8565]	0.409648	-0.252097	0.268	0.226	1	mg-TAM 1	All other cells	ND1_7.Neftel_2019_10x Myeloid_cells	0.332684	0.456743	0.1	1000
KLHL6	kelch like family member 6 [Source:HGNC Symbol;Acc:HGNC:18653]	0.412749	-0.485274	0.123	0.132	1	mg-TAM 1	All other cells	ND1_7.Neftel_2019_10x Myeloid_cells	0.134329	0.280695	0.1	1000
TAGAP	T cell activation RhoGTPase activating protein [Source:HGNC Symbol;Acc:HGNC:15669]	0.417958	-0.322767	0.279	0.244	1	mg-TAM 1	All other cells	ND1_7.Neftel_2019_10x Myeloid_cells	0.430997	0.633276	0.1	1000
C1orf162	chromosome 1 open reading frame 162 [Source:HGNC Symbol;Acc:HGNC:28344]	0.421421	-0.299695	0.762	0.648	1	mg-TAM 1	All other cells	ND1_7.Neftel_2019_10x Myeloid_cells	2.69619	3.67331	0.1	1000
FRMD4A	FERM domain containing 4A [Source:HGNC Symbol;Acc:HGNC:25491]	0.422624	-0.263269	0.459	0.348	1	mg-TAM 1	All other cells	ND1_7.Neftel_2019_10x Myeloid_cells	0.690889	0.929086	0.1	1000
IL1RAP	interleukin 1 receptor accessory protein [Source:HGNC Symbol;Acc:HGNC:5995]	0.423137	-0.284088	0.121	0.11	1	mg-TAM 1	All other cells	ND1_7.Neftel_2019_10x Myeloid_cells	0.129186	0.204485	0.1	1000
EPC1	enhancer of polycomb homolog 1 [Source:HGNC Symbol;Acc:HGNC:19876]	0.433113	-0.283593	0.346	0.286	1	mg-TAM 1	All other cells	ND1_7.Neftel_2019_10x Myeloid_cells	0.458292	0.641351	0.1	1000
NMB	neuromedin B [Source:HGNC Symbol;Acc:HGNC:7842]	0.435235	-0.290204	0.108	0.088	1	mg-TAM 1	All other cells	ND1_7.Neftel_2019_10x Myeloid_cells	0.118445	0.191996	0.1	1000
SLC40A1	solute carrier family 40 member 1 [Source:HGNC Symbol;Acc:HGNC:10909]	0.438385	-0.590991	0.182	0.181	1	mg-TAM 1	All other cells	ND1_7.Neftel_2019_10x Myeloid_cells	0.244487	0.522067	0.1	1000
STAB1	stabilin 1 [Source:HGNC Symbol;Acc:HGNC:18628]	0.441162	-0.371593	0.509	0.378	1	mg-TAM 1	All other cells	ND1_7.Neftel_2019_10x Myeloid_cells	1.05396	1.57328	0.1	1000
TUBB4B	tubulin beta 4B class IVb [Source:HGNC Symbol;Acc:HGNC:20771]	0.450242	-0.369616	0.353	0.298	1	mg-TAM 1	All other cells	ND1_7.Neftel_2019_10x Myeloid_cells	0.542976	0.830502	0.1	1000
KDM2A	lysine demethylase 2A [Source:HGNC Symbol;Acc:HGNC:13606]	0.453444	-0.255096	0.112	0.098	1	mg-TAM 1	All other cells	ND1_7.Neftel_2019_10x Myeloid_cells	0.119716	0.183562	0.1	1000
NDEL1	nudE neurodevelopment protein 1 like 1 [Source:HGNC Symbol;Acc:HGNC:17620]	0.457854	-0.305241	0.11	0.105	1	mg-TAM 1	All other cells	ND1_7.Neftel_2019_10x Myeloid_cells	0.117253	0.194802	0.1	1000
ARIH1	ariadne RBR E3 ubiquitin protein ligase 1 [Source:HGNC Symbol;Acc:HGNC:689]	0.463479	-0.283388	0.101	0.101	1	mg-TAM 1	All other cells	ND1_7.Neftel_2019_10x Myeloid_cells	0.109124	0.177637	0.1	1000
ZNF385A	zinc finger protein 385A [Source:HGNC Symbol;Acc:HGNC:17521]	0.464874	-0.283741	0.346	0.301	1	mg-TAM 1	All other cells	ND1_7.Neftel_2019_10x Myeloid_cells	0.472911	0.660876	0.1	1000
IER2	immediate early response 2 [Source:HGNC Symbol;Acc:HGNC:28871]	0.469077	-0.326109	0.76	0.709	1	mg-TAM 1	All other cells	ND1_7.Neftel_2019_10x Myeloid_cells	6.97256	9.6995	0.1	1000
SRSF7	serine and arginine rich splicing factor 7 [Source:HGNC Symbol;Acc:HGNC:10789]	0.471337	-0.289544	0.662	0.543	1	mg-TAM 1	All other cells	ND1_7.Neftel_2019_10x Myeloid_cells	1.50259	2.04077	0.1	1000
CLEC5A	C-type lectin domain containing 5A [Source:HGNC Symbol;Acc:HGNC:2054]	0.477613	-0.320689	0.241	0.225	1	mg-TAM 1	All other cells	ND1_7.Neftel_2019_10x Myeloid_cells	0.440295	0.644568	0.1	1000
LENG8	leukocyte receptor cluster member 8 [Source:HGNC Symbol;Acc:HGNC:15500]	0.483865	-0.315787	0.166	0.146	1	mg-TAM 1	All other cells	ND1_7.Neftel_2019_10x Myeloid_cells	0.191858	0.300236	0.1	1000
TMEM91	transmembrane protein 91 [Source:HGNC Symbol;Acc:HGNC:32393]	0.484495	-0.262411	0.125	0.104	1	mg-TAM 1	All other cells	ND1_7.Neftel_2019_10x Myeloid_cells	0.140103	0.212149	0.1	1000
P4HA1	prolyl 4-hydroxylase subunit alpha 1 [Source:HGNC Symbol;Acc:HGNC:8546]	0.491046	-0.345683	0.286	0.245	1	mg-TAM 1	All other cells	ND1_7.Neftel_2019_10x Myeloid_cells	0.385622	0.586161	0.1	1000
FNIP2	folliculin interacting protein 2 [Source:HGNC Symbol;Acc:HGNC:29280]	0.498982	-0.294697	0.236	0.202	1	mg-TAM 1	All other cells	ND1_7.Neftel_2019_10x Myeloid_cells	0.30269	0.4407	0.1	1000
ZFAND2A	zinc finger AN1-type containing 2A [Source:HGNC Symbol;Acc:HGNC:28073]	0.50233	-0.792032	0.157	0.164	1	mg-TAM 1	All other cells	ND1_7.Neftel_2019_10x Myeloid_cells	0.193236	0.547429	0.1	1000
CCNH	cyclin H [Source:HGNC Symbol;Acc:HGNC:1594]	0.505088	-0.476284	0.48	0.42	1	mg-TAM 1	All other cells	ND1_7.Neftel_2019_10x Myeloid_cells	0.781854	1.31986	0.1	1000
CSF3R	colony stimulating factor 3 receptor [Source:HGNC Symbol;Acc:HGNC:2439]	0.50887	-0.264428	0.568	0.467	1	mg-TAM 1	All other cells	ND1_7.Neftel_2019_10x Myeloid_cells	0.978176	1.30452	0.1	1000
ZNF302	zinc finger protein 302 [Source:HGNC Symbol;Acc:HGNC:13848]	0.509707	-0.262619	0.109	0.084	1	mg-TAM 1	All other cells	ND1_7.Neftel_2019_10x Myeloid_cells	0.121972	0.188637	0.1	1000
N4BP2L1	NEDD4 binding protein 2 like 1 [Source:HGNC Symbol;Acc:HGNC:25037]	0.511389	-0.259634	0.159	0.141	1	mg-TAM 1	All other cells	ND1_7.Neftel_2019_10x Myeloid_cells	0.181473	0.264917	0.1	1000
SERPINB9	serpin family B member 9 [Source:HGNC Symbol;Acc:HGNC:8955]	0.511816	-0.285216	0.451	0.374	1	mg-TAM 1	All other cells	ND1_7.Neftel_2019_10x Myeloid_cells	0.793735	1.08871	0.1	1000
PTTG1	PTTG1 regulator of sister chromatid separation, securin [Source:HGNC Symbol;Acc:HGNC:9690]	0.513909	-0.380033	0.147	0.107	1	mg-TAM 1	All other cells	ND1_7.Neftel_2019_10x Myeloid_cells	0.168077	0.292018	0.1	1000
IRF2BP2	interferon regulatory factor 2 binding protein 2 [Source:HGNC Symbol;Acc:HGNC:21729]	0.514385	-0.334238	0.318	0.277	1	mg-TAM 1	All other cells	ND1_7.Neftel_2019_10x Myeloid_cells	0.412235	0.615528	0.1	1000
CCNL1	cyclin L1 [Source:HGNC Symbol;Acc:HGNC:20569]	0.520281	-0.394763	0.626	0.567	1	mg-TAM 1	All other cells	ND1_7.Neftel_2019_10x Myeloid_cells	1.26977	1.93278	0.1	1000
APP	amyloid beta precursor protein [Source:HGNC Symbol;Acc:HGNC:620]	0.521659	-0.347792	0.181	0.172	1	mg-TAM 1	All other cells	ND1_7.Neftel_2019_10x Myeloid_cells	0.215768	0.347108	0.1	1000
GBE1	1,4-alpha-glucan branching enzyme 1 [Source:HGNC Symbol;Acc:HGNC:4180]	0.521966	-0.482826	0.133	0.129	1	mg-TAM 1	All other cells	ND1_7.Neftel_2019_10x Myeloid_cells	0.143751	0.295034	0.1	1000
BCAT1	branched chain amino acid transaminase 1 [Source:HGNC Symbol;Acc:HGNC:976]	0.522216	-0.464329	0.152	0.16	1	mg-TAM 1	All other cells	ND1_7.Neftel_2019_10x Myeloid_cells	0.180653	0.346504	0.1	1000
ELMO1	engulfment and cell motility 1 [Source:HGNC Symbol;Acc:HGNC:16286]	0.522291	-0.320242	0.285	0.247	1	mg-TAM 1	All other cells	ND1_7.Neftel_2019_10x Myeloid_cells	0.370957	0.548725	0.1	1000
OGFRL1	opioid growth factor receptor like 1 [Source:HGNC Symbol;Acc:HGNC:21378]	0.52323	-0.348197	0.443	0.401	1	mg-TAM 1	All other cells	ND1_7.Neftel_2019_10x Myeloid_cells	0.703318	1.03791	0.1	1000
PDE4A	phosphodiesterase 4A [Source:HGNC Symbol;Acc:HGNC:8780]	0.524988	-0.252138	0.117	0.111	1	mg-TAM 1	All other cells	ND1_7.Neftel_2019_10x Myeloid_cells	0.131277	0.197602	0.1	1000
PDE4B	phosphodiesterase 4B [Source:HGNC Symbol;Acc:HGNC:8781]	0.525094	-0.429373	0.283	0.26	1	mg-TAM 1	All other cells	ND1_7.Neftel_2019_10x Myeloid_cells	0.399422	0.667259	0.1	1000
MAN2A1	mannosidase alpha class 2A member 1 [Source:HGNC Symbol;Acc:HGNC:6824]	0.530885	-0.275359	0.177	0.162	1	mg-TAM 1	All other cells	ND1_7.Neftel_2019_10x Myeloid_cells	0.211066	0.309675	0.1	1000
EMP3	epithelial membrane protein 3 [Source:HGNC Symbol;Acc:HGNC:3335]	0.534694	-0.26049	0.572	0.515	1	mg-TAM 1	All other cells	ND1_7.Neftel_2019_10x Myeloid_cells	2.05062	2.69057	0.1	1000
MYLIP	myosin regulatory light chain interacting protein [Source:HGNC Symbol;Acc:HGNC:21155]	0.537357	-0.372809	0.177	0.162	1	mg-TAM 1	All other cells	ND1_7.Neftel_2019_10x Myeloid_cells	0.217963	0.361621	0.1	1000
MED15	mediator complex subunit 15 [Source:HGNC Symbol;Acc:HGNC:14248]	0.540178	-0.272438	0.134	0.124	1	mg-TAM 1	All other cells	ND1_7.Neftel_2019_10x Myeloid_cells	0.1475	0.225008	0.1	1000
PPP1R15B	protein phosphatase 1 regulatory subunit 15B [Source:HGNC Symbol;Acc:HGNC:14951]	0.544552	-0.373198	0.157	0.155	1	mg-TAM 1	All other cells	ND1_7.Neftel_2019_10x Myeloid_cells	0.171744	0.294673	0.1	1000
IFIT1	interferon induced protein with tetratricopeptide repeats 1 [Source:HGNC Symbol;Acc:HGNC:5407]	0.545555	-0.625975	0.128	0.117	1	mg-TAM 1	All other cells	ND1_7.Neftel_2019_10x Myeloid_cells	0.196091	0.453711	0.1	1000
CYSTM1	cysteine rich transmembrane module containing 1 [Source:HGNC Symbol;Acc:HGNC:30239]	0.549191	-0.269904	0.212	0.179	1	mg-TAM 1	All other cells	ND1_7.Neftel_2019_10x Myeloid_cells	0.268475	0.382643	0.1	1000
JMJD1C	jumonji domain containing 1C [Source:HGNC Symbol;Acc:HGNC:12313]	0.550582	-0.339584	0.372	0.328	1	mg-TAM 1	All other cells	ND1_7.Neftel_2019_10x Myeloid_cells	0.50469	0.749204	0.1	1000
ERO1A	endoplasmic reticulum oxidoreductase 1 alpha [Source:HGNC Symbol;Acc:HGNC:13280]	0.550716	-0.439184	0.158	0.123	1	mg-TAM 1	All other cells	ND1_7.Neftel_2019_10x Myeloid_cells	0.185317	0.342652	0.1	1000
RBBP6	RB binding protein 6, ubiquitin ligase [Source:HGNC Symbol;Acc:HGNC:9889]	0.561544	-0.304615	0.232	0.2	1	mg-TAM 1	All other cells	ND1_7.Neftel_2019_10x Myeloid_cells	0.28036	0.415808	0.1	1000
TET2	tet methylcytosine dioxygenase 2 [Source:HGNC Symbol;Acc:HGNC:25941]	0.562083	-0.319681	0.1	0.102	1	mg-TAM 1	All other cells	ND1_7.Neftel_2019_10x Myeloid_cells	0.109568	0.188509	0.1	1000
CIITA	class II major histocompatibility complex transactivator [Source:HGNC Symbol;Acc:HGNC:7067]	0.566304	-0.365362	0.117	0.123	1	mg-TAM 1	All other cells	ND1_7.Neftel_2019_10x Myeloid_cells	0.136767	0.241189	0.1	1000
ARRDC2	arrestin domain containing 2 [Source:HGNC Symbol;Acc:HGNC:25225]	0.572993	-0.332699	0.161	0.15	1	mg-TAM 1	All other cells	ND1_7.Neftel_2019_10x Myeloid_cells	0.192462	0.307905	0.1	1000
LRRFIP1	LRR binding FLII interacting protein 1 [Source:HGNC Symbol;Acc:HGNC:6702]	0.574898	-0.28313	0.565	0.469	1	mg-TAM 1	All other cells	ND1_7.Neftel_2019_10x Myeloid_cells	0.976573	1.32891	0.1	1000
IRF1	interferon regulatory factor 1 [Source:HGNC Symbol;Acc:HGNC:6116]	0.580757	-0.397148	0.169	0.148	1	mg-TAM 1	All other cells	ND1_7.Neftel_2019_10x Myeloid_cells	0.226666	0.38594	0.1	1000
ANG	angiogenin [Source:HGNC Symbol;Acc:HGNC:483]	0.582464	-0.348799	0.142	0.126	1	mg-TAM 1	All other cells	ND1_7.Neftel_2019_10x Myeloid_cells	0.174241	0.2887	0.1	1000
AP1S2	adaptor related protein complex 1 subunit sigma 2 [Source:HGNC Symbol;Acc:HGNC:560]	0.585987	-0.334652	0.471	0.387	1	mg-TAM 1	All other cells	ND1_7.Neftel_2019_10x Myeloid_cells	0.715782	1.04002	0.1	1000
ARRDC3	arrestin domain containing 3 [Source:HGNC Symbol;Acc:HGNC:29263]	0.586768	-0.398962	0.231	0.203	1	mg-TAM 1	All other cells	ND1_7.Neftel_2019_10x Myeloid_cells	0.306567	0.505898	0.1	1000
PLXNC1	plexin C1 [Source:HGNC Symbol;Acc:HGNC:9106]	0.588097	-0.347008	0.142	0.142	1	mg-TAM 1	All other cells	ND1_7.Neftel_2019_10x Myeloid_cells	0.155776	0.26188	0.1	1000
PDE4DIP	phosphodiesterase 4D interacting protein [Source:HGNC Symbol;Acc:HGNC:15580]	0.591243	-0.574367	0.18	0.204	1	mg-TAM 1	All other cells	ND1_7.Neftel_2019_10x Myeloid_cells	0.237604	0.499587	0.1	1000
SNHG12	small nucleolar RNA host gene 12 [Source:HGNC Symbol;Acc:HGNC:30062]	0.591266	-0.757223	0.265	0.237	1	mg-TAM 1	All other cells	ND1_7.Neftel_2019_10x Myeloid_cells	0.419039	1.00677	0.1	1000
DEDD2	death effector domain containing 2 [Source:HGNC Symbol;Acc:HGNC:24450]	0.604385	-0.37467	0.125	0.13	1	mg-TAM 1	All other cells	ND1_7.Neftel_2019_10x Myeloid_cells	0.128148	0.231844	0.1	1000
NEDD9	neural precursor cell expressed, developmentally down-regulated 9 [Source:HGNC Symbol;Acc:HGNC:7733]	0.605737	-0.401973	0.146	0.135	1	mg-TAM 1	All other cells	ND1_7.Neftel_2019_10x Myeloid_cells	0.178584	0.316419	0.1	1000
MT2A	metallothionein 2A [Source:HGNC Symbol;Acc:HGNC:7406]	0.607011	-0.97414	0.731	0.641	1	mg-TAM 1	All other cells	ND1_7.Neftel_2019_10x Myeloid_cells	5.6058	15.014	0.1	1000
MYO9B	myosin IXB [Source:HGNC Symbol;Acc:HGNC:7609]	0.610928	-0.343148	0.305	0.269	1	mg-TAM 1	All other cells	ND1_7.Neftel_2019_10x Myeloid_cells	0.384663	0.583073	0.1	1000
PPDPF	pancreatic progenitor cell differentiation and proliferation factor [Source:HGNC Symbol;Acc:HGNC:16142]	0.6114	-0.286926	0.673	0.546	1	mg-TAM 1	All other cells	ND1_7.Neftel_2019_10x Myeloid_cells	1.49835	2.02952	0.1	1000
KLF2	Kruppel like factor 2 [Source:HGNC Symbol;Acc:HGNC:6347]	0.613021	-0.718109	0.372	0.36	1	mg-TAM 1	All other cells	ND1_7.Neftel_2019_10x Myeloid_cells	0.792324	1.72976	0.1	1000
GPI	glucose-6-phosphate isomerase [Source:HGNC Symbol;Acc:HGNC:4458]	0.617039	-0.284664	0.368	0.307	1	mg-TAM 1	All other cells	ND1_7.Neftel_2019_10x Myeloid_cells	0.554534	0.770081	0.1	1000
CD55	CD55 molecule (Cromer blood group) [Source:HGNC Symbol;Acc:HGNC:2665]	0.621141	-0.540949	0.211	0.222	1	mg-TAM 1	All other cells	ND1_7.Neftel_2019_10x Myeloid_cells	0.255237	0.510167	0.1	1000
SBF2	SET binding factor 2 [Source:HGNC Symbol;Acc:HGNC:2135]	0.62745	-0.28261	0.125	0.113	1	mg-TAM 1	All other cells	ND1_7.Neftel_2019_10x Myeloid_cells	0.133764	0.210108	0.1	1000
PHACTR4	phosphatase and actin regulator 4 [Source:HGNC Symbol;Acc:HGNC:25793]	0.628406	-0.255337	0.129	0.112	1	mg-TAM 1	All other cells	ND1_7.Neftel_2019_10x Myeloid_cells	0.139473	0.209135	0.1	1000
TNFAIP2	TNF alpha induced protein 2 [Source:HGNC Symbol;Acc:HGNC:11895]	0.629989	-0.384585	0.183	0.174	1	mg-TAM 1	All other cells	ND1_7.Neftel_2019_10x Myeloid_cells	0.225769	0.378556	0.1	1000
IRAK3	interleukin 1 receptor associated kinase 3 [Source:HGNC Symbol;Acc:HGNC:17020]	0.634674	-0.306194	0.186	0.166	1	mg-TAM 1	All other cells	ND1_7.Neftel_2019_10x Myeloid_cells	0.212789	0.324844	0.1	1000
HERC5	HECT and RLD domain containing E3 ubiquitin protein ligase 5 [Source:HGNC Symbol;Acc:HGNC:24368]	0.642539	-0.274318	0.105	0.091	1	mg-TAM 1	All other cells	ND1_7.Neftel_2019_10x Myeloid_cells	0.123121	0.193545	0.1	1000
GLS	glutaminase [Source:HGNC Symbol;Acc:HGNC:4331]	0.64722	-0.261155	0.206	0.171	1	mg-TAM 1	All other cells	ND1_7.Neftel_2019_10x Myeloid_cells	0.234983	0.334951	0.1	1000
PLXND1	plexin D1 [Source:HGNC Symbol;Acc:HGNC:9107]	0.651202	-0.281538	0.185	0.156	1	mg-TAM 1	All other cells	ND1_7.Neftel_2019_10x Myeloid_cells	0.221732	0.326348	0.1	1000
APOL6	apolipoprotein L6 [Source:HGNC Symbol;Acc:HGNC:14870]	0.652606	-0.274187	0.144	0.128	1	mg-TAM 1	All other cells	ND1_7.Neftel_2019_10x Myeloid_cells	0.162647	0.245502	0.1	1000
KLF7	Kruppel like factor 7 [Source:HGNC Symbol;Acc:HGNC:6350]	0.652625	-0.250987	0.144	0.124	1	mg-TAM 1	All other cells	ND1_7.Neftel_2019_10x Myeloid_cells	0.165976	0.241857	0.1	1000
PHF1	PHD finger protein 1 [Source:HGNC Symbol;Acc:HGNC:8919]	0.654051	-0.350293	0.108	0.112	1	mg-TAM 1	All other cells	ND1_7.Neftel_2019_10x Myeloid_cells	0.112348	0.201424	0.1	1000
TMEM107	transmembrane protein 107 [Source:HGNC Symbol;Acc:HGNC:28128]	0.657438	-0.3975	0.265	0.235	1	mg-TAM 1	All other cells	ND1_7.Neftel_2019_10x Myeloid_cells	0.412272	0.662312	0.1	1000
VPS37B	VPS37B subunit of ESCRT-I [Source:HGNC Symbol;Acc:HGNC:25754]	0.668924	-0.285691	0.132	0.116	1	mg-TAM 1	All other cells	ND1_7.Neftel_2019_10x Myeloid_cells	0.150295	0.233064	0.1	1000
FAM53C	family with sequence similarity 53 member C [Source:HGNC Symbol;Acc:HGNC:1336]	0.67728	-0.502444	0.146	0.164	1	mg-TAM 1	All other cells	ND1_7.Neftel_2019_10x Myeloid_cells	0.172056	0.349641	0.1	1000
GPRIN3	GPRIN family member 3 [Source:HGNC Symbol;Acc:HGNC:27733]	0.677601	-0.267988	0.224	0.197	1	mg-TAM 1	All other cells	ND1_7.Neftel_2019_10x Myeloid_cells	0.272359	0.386797	0.1	1000
PELI1	pellino E3 ubiquitin protein ligase 1 [Source:HGNC Symbol;Acc:HGNC:8827]	0.694826	-0.403351	0.336	0.294	1	mg-TAM 1	All other cells	ND1_7.Neftel_2019_10x Myeloid_cells	0.476387	0.762755	0.1	1000
ZFYVE16	zinc finger FYVE-type containing 16 [Source:HGNC Symbol;Acc:HGNC:20756]	0.695712	-0.283322	0.151	0.131	1	mg-TAM 1	All other cells	ND1_7.Neftel_2019_10x Myeloid_cells	0.163675	0.250037	0.1	1000
CLEC4A	C-type lectin domain family 4 member A [Source:HGNC Symbol;Acc:HGNC:13257]	0.697107	-0.274538	0.153	0.142	1	mg-TAM 1	All other cells	ND1_7.Neftel_2019_10x Myeloid_cells	0.176323	0.263619	0.1	1000
MMP14	matrix metallopeptidase 14 [Source:HGNC Symbol;Acc:HGNC:7160]	0.697436	-0.32133	0.249	0.228	1	mg-TAM 1	All other cells	ND1_7.Neftel_2019_10x Myeloid_cells	0.331438	0.494936	0.1	1000
CHI3L1	chitinase 3 like 1 [Source:HGNC Symbol;Acc:HGNC:1932]	0.702838	-0.983483	0.208	0.181	1	mg-TAM 1	All other cells	ND1_7.Neftel_2019_10x Myeloid_cells	0.555998	1.65398	0.1	1000
HGSNAT	heparan-alpha-glucosaminide N-acetyltransferase [Source:HGNC Symbol;Acc:HGNC:26527]	0.706482	-0.323691	0.166	0.157	1	mg-TAM 1	All other cells	ND1_7.Neftel_2019_10x Myeloid_cells	0.186325	0.295764	0.1	1000
SRGAP1	SLIT-ROBO Rho GTPase activating protein 1 [Source:HGNC Symbol;Acc:HGNC:17382]	0.708481	-0.43786	0.126	0.13	1	mg-TAM 1	All other cells	ND1_7.Neftel_2019_10x Myeloid_cells	0.144758	0.279225	0.1	1000
FAM111A	FAM111 trypsin like peptidase A [Source:HGNC Symbol;Acc:HGNC:24725]	0.717546	-0.294397	0.146	0.128	1	mg-TAM 1	All other cells	ND1_7.Neftel_2019_10x Myeloid_cells	0.164029	0.254411	0.1	1000
PTEN	phosphatase and tensin homolog [Source:HGNC Symbol;Acc:HGNC:9588]	0.7183	-0.306635	0.197	0.183	1	mg-TAM 1	All other cells	ND1_7.Neftel_2019_10x Myeloid_cells	0.220224	0.335135	0.1	1000
CXCL8	C-X-C motif chemokine ligand 8 [Source:HGNC Symbol;Acc:HGNC:6025]	0.721441	-0.86313	0.418	0.382	1	mg-TAM 1	All other cells	ND1_7.Neftel_2019_10x Myeloid_cells	3.25193	7.84598	0.1	1000
NBEAL1	neurobeachin like 1 [Source:HGNC Symbol;Acc:HGNC:20681]	0.725906	-0.461113	0.569	0.449	1	mg-TAM 1	All other cells	ND1_7.Neftel_2019_10x Myeloid_cells	1.2487	2.03882	0.1	1000
CD52	CD52 molecule [Source:HGNC Symbol;Acc:HGNC:1804]	0.727148	-0.944782	0.15	0.145	1	mg-TAM 1	All other cells	ND1_7.Neftel_2019_10x Myeloid_cells	0.198514	0.667854	0.1	1000
AFF4	AF4/FMR2 family member 4 [Source:HGNC Symbol;Acc:HGNC:17869]	0.728428	-0.344775	0.277	0.249	1	mg-TAM 1	All other cells	ND1_7.Neftel_2019_10x Myeloid_cells	0.349806	0.534979	0.1	1000
IFIT2	interferon induced protein with tetratricopeptide repeats 2 [Source:HGNC Symbol;Acc:HGNC:5409]	0.736218	-0.712163	0.112	0.116	1	mg-TAM 1	All other cells	ND1_7.Neftel_2019_10x Myeloid_cells	0.171752	0.453937	0.1	1000
SMG1	SMG1 nonsense mediated mRNA decay associated PI3K related kinase [Source:HGNC Symbol;Acc:HGNC:30045]	0.738611	-0.262377	0.161	0.142	1	mg-TAM 1	All other cells	ND1_7.Neftel_2019_10x Myeloid_cells	0.188752	0.275382	0.1	1000
EZR	ezrin [Source:HGNC Symbol;Acc:HGNC:12691]	0.739905	-0.284775	0.324	0.272	1	mg-TAM 1	All other cells	ND1_7.Neftel_2019_10x Myeloid_cells	0.445678	0.625458	0.1	1000
SPAG9	sperm associated antigen 9 [Source:HGNC Symbol;Acc:HGNC:14524]	0.742973	-0.330497	0.205	0.19	1	mg-TAM 1	All other cells	ND1_7.Neftel_2019_10x Myeloid_cells	0.234835	0.365976	0.1	1000
HSP90AA1	heat shock protein 90 alpha family class A member 1 [Source:HGNC Symbol;Acc:HGNC:5253]	0.744774	-0.412137	0.981	0.876	1	mg-TAM 1	All other cells	ND1_7.Neftel_2019_10x Myeloid_cells	8.5095	12.9007	0.1	1000
GABARAPL1	GABA type A receptor associated protein like 1 [Source:HGNC Symbol;Acc:HGNC:4068]	0.745656	-0.317289	0.396	0.336	1	mg-TAM 1	All other cells	ND1_7.Neftel_2019_10x Myeloid_cells	0.610385	0.875642	0.1	1000
RXRA	retinoid X receptor alpha [Source:HGNC Symbol;Acc:HGNC:10477]	0.746326	-0.314146	0.123	0.12	1	mg-TAM 1	All other cells	ND1_7.Neftel_2019_10x Myeloid_cells	0.135279	0.222118	0.1	1000
IFITM3	interferon induced transmembrane protein 3 [Source:HGNC Symbol;Acc:HGNC:5414]	0.74711	-0.308289	0.646	0.542	1	mg-TAM 1	All other cells	ND1_7.Neftel_2019_10x Myeloid_cells	2.4864	3.42033	0.1	1000
ACTN4	actinin alpha 4 [Source:HGNC Symbol;Acc:HGNC:166]	0.74998	-0.356094	0.172	0.171	1	mg-TAM 1	All other cells	ND1_7.Neftel_2019_10x Myeloid_cells	0.197032	0.324085	0.1	1000
CREM	cAMP responsive element modulator [Source:HGNC Symbol;Acc:HGNC:2352]	0.750315	-0.50655	0.486	0.432	1	mg-TAM 1	All other cells	ND1_7.Neftel_2019_10x Myeloid_cells	1.1719	2.01079	0.1	1000
MIR181A1HG	MIR181A1 host gene [Source:HGNC Symbol;Acc:HGNC:48659]	0.751686	-0.337659	0.129	0.124	1	mg-TAM 1	All other cells	ND1_7.Neftel_2019_10x Myeloid_cells	0.148025	0.247647	0.1	1000
RAPH1	Ras association (RalGDS/AF-6) and pleckstrin homology domains 1 [Source:HGNC Symbol;Acc:HGNC:14436]	0.757763	-0.311263	0.105	0.102	1	mg-TAM 1	All other cells	ND1_7.Neftel_2019_10x Myeloid_cells	0.116101	0.195009	0.1	1000
LY6E	lymphocyte antigen 6 family member E [Source:HGNC Symbol;Acc:HGNC:6727]	0.757819	-0.378623	0.423	0.385	1	mg-TAM 1	All other cells	ND1_7.Neftel_2019_10x Myeloid_cells	1.3773	2.05726	0.1	1000
SERTAD1	SERTA domain containing 1 [Source:HGNC Symbol;Acc:HGNC:17932]	0.761051	-0.48902	0.223	0.215	1	mg-TAM 1	All other cells	ND1_7.Neftel_2019_10x Myeloid_cells	0.293386	0.541502	0.1	1000
C12orf57	chromosome 12 open reading frame 57 [Source:HGNC Symbol;Acc:HGNC:29521]	0.762803	-0.268095	0.445	0.369	1	mg-TAM 1	All other cells	ND1_7.Neftel_2019_10x Myeloid_cells	0.861288	1.15686	0.1	1000
AVPI1	arginine vasopressin induced 1 [Source:HGNC Symbol;Acc:HGNC:30898]	0.767525	-0.34958	0.117	0.116	1	mg-TAM 1	All other cells	ND1_7.Neftel_2019_10x Myeloid_cells	0.155645	0.262625	0.1	1000
ARL4A	ADP ribosylation factor like GTPase 4A [Source:HGNC Symbol;Acc:HGNC:695]	0.771502	-0.463516	0.252	0.23	1	mg-TAM 1	All other cells	ND1_7.Neftel_2019_10x Myeloid_cells	0.340357	0.600015	0.1	1000
PPP1R10	protein phosphatase 1 regulatory subunit 10 [Source:HGNC Symbol;Acc:HGNC:9284]	0.775994	-0.415162	0.275	0.253	1	mg-TAM 1	All other cells	ND1_7.Neftel_2019_10x Myeloid_cells	0.357217	0.592509	0.1	1000
ATF4	activating transcription factor 4 [Source:HGNC Symbol;Acc:HGNC:786]	0.777131	-0.288554	0.537	0.45	1	mg-TAM 1	All other cells	ND1_7.Neftel_2019_10x Myeloid_cells	0.891575	1.22325	0.1	1000
DUSP6	dual specificity phosphatase 6 [Source:HGNC Symbol;Acc:HGNC:3072]	0.787688	-0.421397	0.275	0.239	1	mg-TAM 1	All other cells	ND1_7.Neftel_2019_10x Myeloid_cells	0.440265	0.723412	0.1	1000
PSMA6	proteasome 20S subunit alpha 6 [Source:HGNC Symbol;Acc:HGNC:9535]	0.788303	-0.313982	0.177	0.17	1	mg-TAM 1	All other cells	ND1_7.Neftel_2019_10x Myeloid_cells	0.233616	0.356675	0.1	1000
CD93	CD93 molecule [Source:HGNC Symbol;Acc:HGNC:15855]	0.801194	-0.306298	0.184	0.154	1	mg-TAM 1	All other cells	ND1_7.Neftel_2019_10x Myeloid_cells	0.241927	0.364469	0.1	1000
TES	testin LIM domain protein [Source:HGNC Symbol;Acc:HGNC:14620]	0.802352	-0.307653	0.11	0.11	1	mg-TAM 1	All other cells	ND1_7.Neftel_2019_10x Myeloid_cells	0.116599	0.194624	0.1	1000
CLEC7A	C-type lectin domain containing 7A [Source:HGNC Symbol;Acc:HGNC:14558]	0.80925	-0.349234	0.605	0.532	1	mg-TAM 1	All other cells	ND1_7.Neftel_2019_10x Myeloid_cells	1.18755	1.72573	0.1	1000
CLEC11A	C-type lectin domain containing 11A [Source:HGNC Symbol;Acc:HGNC:10576]	0.810184	-0.260014	0.146	0.128	1	mg-TAM 1	All other cells	ND1_7.Neftel_2019_10x Myeloid_cells	0.172167	0.252987	0.1	1000
GAB2	GRB2 associated binding protein 2 [Source:HGNC Symbol;Acc:HGNC:14458]	0.813429	-0.287525	0.114	0.106	1	mg-TAM 1	All other cells	ND1_7.Neftel_2019_10x Myeloid_cells	0.121696	0.195548	0.1	1000
EMD	emerin [Source:HGNC Symbol;Acc:HGNC:3331]	0.814079	-0.254335	0.315	0.262	1	mg-TAM 1	All other cells	ND1_7.Neftel_2019_10x Myeloid_cells	0.410131	0.557868	0.1	1000
ABHD5	abhydrolase domain containing 5, lysophosphatidic acid acyltransferase [Source:HGNC Symbol;Acc:HGNC:21396]	0.814372	-0.550829	0.099	0.116	1	mg-TAM 1	All other cells	ND1_7.Neftel_2019_10x Myeloid_cells	0.112209	0.268116	0.1	1000
EGR1	early growth response 1 [Source:HGNC Symbol;Acc:HGNC:3238]	0.81504	-0.592726	0.582	0.54	1	mg-TAM 1	All other cells	ND1_7.Neftel_2019_10x Myeloid_cells	2.58862	4.76347	0.1	1000
USP53	ubiquitin specific peptidase 53 [Source:HGNC Symbol;Acc:HGNC:29255]	0.818131	-0.400583	0.319	0.28	1	mg-TAM 1	All other cells	ND1_7.Neftel_2019_10x Myeloid_cells	0.479866	0.765563	0.1	1000
NFKB1	nuclear factor kappa B subunit 1 [Source:HGNC Symbol;Acc:HGNC:7794]	0.819017	-0.344067	0.139	0.129	1	mg-TAM 1	All other cells	ND1_7.Neftel_2019_10x Myeloid_cells	0.156794	0.262252	0.1	1000
TNFRSF1B	TNF receptor superfamily member 1B [Source:HGNC Symbol;Acc:HGNC:11917]	0.821317	-0.262026	0.47	0.403	1	mg-TAM 1	All other cells	ND1_7.Neftel_2019_10x Myeloid_cells	0.816058	1.09047	0.1	1000
ZC3HAV1	zinc finger CCCH-type containing, antiviral 1 [Source:HGNC Symbol;Acc:HGNC:23721]	0.827533	-0.341272	0.188	0.173	1	mg-TAM 1	All other cells	ND1_7.Neftel_2019_10x Myeloid_cells	0.24348	0.383186	0.1	1000
GCLC	glutamate-cysteine ligase catalytic subunit [Source:HGNC Symbol;Acc:HGNC:4311]	0.830742	-0.283929	0.15	0.132	1	mg-TAM 1	All other cells	ND1_7.Neftel_2019_10x Myeloid_cells	0.163166	0.249574	0.1	1000
SMCHD1	structural maintenance of chromosomes flexible hinge domain containing 1 [Source:HGNC Symbol;Acc:HGNC:29090]	0.83633	-0.379162	0.157	0.153	1	mg-TAM 1	All other cells	ND1_7.Neftel_2019_10x Myeloid_cells	0.173607	0.299756	0.1	1000
UTRN	utrophin [Source:HGNC Symbol;Acc:HGNC:12635]	0.838181	-0.468888	0.119	0.141	1	mg-TAM 1	All other cells	ND1_7.Neftel_2019_10x Myeloid_cells	0.132072	0.270901	0.1	1000
PRKAG2	protein kinase AMP-activated non-catalytic subunit gamma 2 [Source:HGNC Symbol;Acc:HGNC:9386]	0.843369	-0.275386	0.213	0.177	1	mg-TAM 1	All other cells	ND1_7.Neftel_2019_10x Myeloid_cells	0.252623	0.364419	0.1	1000
DDX3X	DEAD-box helicase 3 X-linked [Source:HGNC Symbol;Acc:HGNC:2745]	0.843569	-0.346404	0.522	0.452	1	mg-TAM 1	All other cells	ND1_7.Neftel_2019_10x Myeloid_cells	0.837829	1.22607	0.1	1000
RILPL2	Rab interacting lysosomal protein like 2 [Source:HGNC Symbol;Acc:HGNC:28787]	0.845492	-0.370616	0.515	0.436	1	mg-TAM 1	All other cells	ND1_7.Neftel_2019_10x Myeloid_cells	0.862155	1.2938	0.1	1000
GK	glycerol kinase [Source:HGNC Symbol;Acc:HGNC:4289]	0.84998	-0.424142	0.219	0.2	1	mg-TAM 1	All other cells	ND1_7.Neftel_2019_10x Myeloid_cells	0.287665	0.49246	0.1	1000
BTG3	BTG anti-proliferation factor 3 [Source:HGNC Symbol;Acc:HGNC:1132]	0.853638	-0.262149	0.214	0.179	1	mg-TAM 1	All other cells	ND1_7.Neftel_2019_10x Myeloid_cells	0.25786	0.365118	0.1	1000
TFRC	transferrin receptor [Source:HGNC Symbol;Acc:HGNC:11763]	0.854747	-0.408982	0.199	0.194	1	mg-TAM 1	All other cells	ND1_7.Neftel_2019_10x Myeloid_cells	0.333051	0.551865	0.1	1000
CARHSP1	calcium regulated heat stable protein 1 [Source:HGNC Symbol;Acc:HGNC:17150]	0.859902	-0.267163	0.217	0.173	1	mg-TAM 1	All other cells	ND1_7.Neftel_2019_10x Myeloid_cells	0.255096	0.363846	0.1	1000
ITPRIP	inositol 1,4,5-trisphosphate receptor interacting protein [Source:HGNC Symbol;Acc:HGNC:29370]	0.86185	-0.286943	0.126	0.114	1	mg-TAM 1	All other cells	ND1_7.Neftel_2019_10x Myeloid_cells	0.139638	0.219281	0.1	1000
PMP22	peripheral myelin protein 22 [Source:HGNC Symbol;Acc:HGNC:9118]	0.870307	-0.347677	0.247	0.2	1	mg-TAM 1	All other cells	ND1_7.Neftel_2019_10x Myeloid_cells	0.396153	0.602441	0.1	1000
TREM1	triggering receptor expressed on myeloid cells 1 [Source:HGNC Symbol;Acc:HGNC:17760]	0.875116	-0.489903	0.235	0.22	1	mg-TAM 1	All other cells	ND1_7.Neftel_2019_10x Myeloid_cells	0.384537	0.690841	0.1	1000
MT-ND6	mitochondrially encoded NADH:ubiquinone oxidoreductase core subunit 6 [Source:HGNC Symbol;Acc:HGNC:7462]	0.880816	-0.402775	0.215	0.21	1	mg-TAM 1	All other cells	ND1_7.Neftel_2019_10x Myeloid_cells	0.426015	0.686903	0.1	1000
DNAJB9	DnaJ heat shock protein family (Hsp40) member B9 [Source:HGNC Symbol;Acc:HGNC:6968]	0.88497	-0.48127	0.221	0.19	1	mg-TAM 1	All other cells	ND1_7.Neftel_2019_10x Myeloid_cells	0.286366	0.52519	0.1	1000
PIM3	Pim-3 proto-oncogene, serine/threonine kinase [Source:HGNC Symbol;Acc:HGNC:19310]	0.889375	-0.330455	0.196	0.181	1	mg-TAM 1	All other cells	ND1_7.Neftel_2019_10x Myeloid_cells	0.236892	0.368819	0.1	1000
TRIB1	tribbles pseudokinase 1 [Source:HGNC Symbol;Acc:HGNC:16891]	0.89691	-0.43808	0.321	0.282	1	mg-TAM 1	All other cells	ND1_7.Neftel_2019_10x Myeloid_cells	0.475892	0.792476	0.1	1000
CHD2	chromodomain helicase DNA binding protein 2 [Source:HGNC Symbol;Acc:HGNC:1917]	0.898206	-0.417265	0.22	0.218	1	mg-TAM 1	All other cells	ND1_7.Neftel_2019_10x Myeloid_cells	0.264851	0.453773	0.1	1000
RALA	RAS like proto-oncogene A [Source:HGNC Symbol;Acc:HGNC:9839]	0.902289	-0.444373	0.215	0.197	1	mg-TAM 1	All other cells	ND1_7.Neftel_2019_10x Myeloid_cells	0.251679	0.448447	0.1	1000
ABCA1	ATP binding cassette subfamily A member 1 [Source:HGNC Symbol;Acc:HGNC:29]	0.914956	-0.492084	0.287	0.274	1	mg-TAM 1	All other cells	ND1_7.Neftel_2019_10x Myeloid_cells	0.410004	0.734224	0.1	1000
CRYAB	crystallin alpha B [Source:HGNC Symbol;Acc:HGNC:2389]	0.929696	-0.571216	0.162	0.148	1	mg-TAM 1	All other cells	ND1_7.Neftel_2019_10x Myeloid_cells	0.244395	0.509724	0.1	1000
EIF5	eukaryotic translation initiation factor 5 [Source:HGNC Symbol;Acc:HGNC:3299]	0.930139	-0.275396	0.619	0.523	1	mg-TAM 1	All other cells	ND1_7.Neftel_2019_10x Myeloid_cells	1.17534	1.57969	0.1	1000
CLEC9A	C-type lectin domain containing 9A [Source:HGNC Symbol;Acc:HGNC:26705]	0.934586	-0.439822	0.115	0.116	1	mg-TAM 1	All other cells	ND1_7.Neftel_2019_10x Myeloid_cells	0.166962	0.31444	0.1	1000
NUP58	nucleoporin 58 [Source:HGNC Symbol;Acc:HGNC:20261]	0.939906	-0.289498	0.102	0.097	1	mg-TAM 1	All other cells	ND1_7.Neftel_2019_10x Myeloid_cells	0.113376	0.185018	0.1	1000
PIK3R5	phosphoinositide-3-kinase regulatory subunit 5 [Source:HGNC Symbol;Acc:HGNC:30035]	0.946983	-0.280015	0.164	0.152	1	mg-TAM 1	All other cells	ND1_7.Neftel_2019_10x Myeloid_cells	0.191428	0.285603	0.1	1000
JOSD1	Josephin domain containing 1 [Source:HGNC Symbol;Acc:HGNC:28953]	0.948827	-0.289736	0.151	0.143	1	mg-TAM 1	All other cells	ND1_7.Neftel_2019_10x Myeloid_cells	0.163924	0.252623	0.1	1000
PLP2	proteolipid protein 2 [Source:HGNC Symbol;Acc:HGNC:9087]	0.950009	-0.40349	0.331	0.27	1	mg-TAM 1	All other cells	ND1_7.Neftel_2019_10x Myeloid_cells	0.490915	0.784623	0.1	1000
MEF2D	myocyte enhancer factor 2D [Source:HGNC Symbol;Acc:HGNC:6997]	0.951087	-0.263044	0.116	0.106	1	mg-TAM 1	All other cells	ND1_7.Neftel_2019_10x Myeloid_cells	0.128207	0.196871	0.1	1000
PHC2	polyhomeotic homolog 2 [Source:HGNC Symbol;Acc:HGNC:3183]	0.95283	-0.288847	0.327	0.271	1	mg-TAM 1	All other cells	ND1_7.Neftel_2019_10x Myeloid_cells	0.437977	0.618138	0.1	1000
USP36	ubiquitin specific peptidase 36 [Source:HGNC Symbol;Acc:HGNC:20062]	0.954971	-0.375975	0.127	0.129	1	mg-TAM 1	All other cells	ND1_7.Neftel_2019_10x Myeloid_cells	0.140399	0.25012	0.1	1000
FOXN2	forkhead box N2 [Source:HGNC Symbol;Acc:HGNC:5281]	0.955315	-0.363324	0.113	0.118	1	mg-TAM 1	All other cells	ND1_7.Neftel_2019_10x Myeloid_cells	0.123325	0.221165	0.1	1000
PTPRE	protein tyrosine phosphatase receptor type E [Source:HGNC Symbol;Acc:HGNC:9669]	0.955351	-0.368508	0.419	0.364	1	mg-TAM 1	All other cells	ND1_7.Neftel_2019_10x Myeloid_cells	0.644258	0.975882	0.1	1000
CITED2	Cbp/p300 interacting transactivator with Glu/Asp rich carboxy-terminal domain 2 [Source:HGNC Symbol;Acc:HGNC:1987]	0.956564	-0.553423	0.374	0.366	1	mg-TAM 1	All other cells	ND1_7.Neftel_2019_10x Myeloid_cells	1.11265	2.00903	0.1	1000
OTUD1	OTU deubiquitinase 1 [Source:HGNC Symbol;Acc:HGNC:27346]	0.959412	-0.578415	0.236	0.244	1	mg-TAM 1	All other cells	ND1_7.Neftel_2019_10x Myeloid_cells	0.388186	0.770538	0.1	1000
PTGER4	prostaglandin E receptor 4 [Source:HGNC Symbol;Acc:HGNC:9596]	0.962592	-0.374306	0.258	0.25	1	mg-TAM 1	All other cells	ND1_7.Neftel_2019_10x Myeloid_cells	0.399808	0.626711	0.1	1000
YPEL3	yippee like 3 [Source:HGNC Symbol;Acc:HGNC:18327]	0.972043	-0.284854	0.219	0.201	1	mg-TAM 1	All other cells	ND1_7.Neftel_2019_10x Myeloid_cells	0.279433	0.404482	0.1	1000
CREBBP	CREB binding protein [Source:HGNC Symbol;Acc:HGNC:2348]	0.974177	-0.266376	0.129	0.117	1	mg-TAM 1	All other cells	ND1_7.Neftel_2019_10x Myeloid_cells	0.135298	0.207117	0.1	1000
CCND3	cyclin D3 [Source:HGNC Symbol;Acc:HGNC:1585]	0.979208	-0.328733	0.243	0.221	1	mg-TAM 1	All other cells	ND1_7.Neftel_2019_10x Myeloid_cells	0.309629	0.469059	0.1	1000
BHLHE40	basic helix-loop-helix family member e40 [Source:HGNC Symbol;Acc:HGNC:1046]	0.990689	-0.44819	0.226	0.218	1	mg-TAM 1	All other cells	ND1_7.Neftel_2019_10x Myeloid_cells	0.312843	0.546296	0.1	1000
RHOH	ras homolog family member H [Source:HGNC Symbol;Acc:HGNC:686]	0.993352	-0.390672	0.121	0.129	1	mg-TAM 1	All other cells	ND1_7.Neftel_2019_10x Myeloid_cells	0.136046	0.24887	0.1	1000
RP6-91H8.3		0.248474	-0.404349	0.149	0.143	1	mg-TAM 1	All other cells	ND1_7.Neftel_2019_10x Myeloid_cells	0.219363	0.37851	0.1	1000
ATP5EP2		0.00091333	-0.266806	0.23	0.157	1	mg-TAM 1	All other cells	ND1_7.Neftel_2019_10x Myeloid_cells	0.362689	0.504174	0.1	1000
SELK		0.0390075	-0.345106	0.699	0.563	1	mg-TAM 1	All other cells	ND1_7.Neftel_2019_10x Myeloid_cells	1.66745	2.39589	0.1	1000
RP11-1000B6.3		0.662849	-0.297796	0.13	0.122	1	mg-TAM 1	All other cells	ND1_7.Neftel_2019_10x Myeloid_cells	0.160388	0.250713	0.1	1000
LINC00969		0.670271	-0.369083	0.117	0.114	1	mg-TAM 1	All other cells	ND1_7.Neftel_2019_10x Myeloid_cells	0.131658	0.235071	0.1	1000
MGEA5		0.662654	-0.270576	0.177	0.155	1	mg-TAM 1	All other cells	ND1_7.Neftel_2019_10x Myeloid_cells	0.203124	0.29731	0.1	1000
H2AFX		0.00212089	-0.292791	0.156	0.131	1	mg-TAM 1	All other cells	ND1_7.Neftel_2019_10x Myeloid_cells	0.173025	0.265897	0.1	1000
FAM46A		0.0133872	-0.6288	0.071	0.104	1	mg-TAM 1	All other cells	ND1_7.Neftel_2019_10x Myeloid_cells	0.0940681	0.263947	0.1	1000
CECR1		0.316742	-0.294454	0.274	0.24	1	mg-TAM 1	All other cells	ND1_7.Neftel_2019_10x Myeloid_cells	0.354905	0.510662	0.1	1000
GRASP		0.00535305	-0.718768	0.1	0.152	1	mg-TAM 1	All other cells	ND1_7.Neftel_2019_10x Myeloid_cells	0.124267	0.360175	0.1	1000
RP11-160E2.6		0.000268551	-0.273105	0.428	0.348	1	mg-TAM 1	All other cells	ND1_7.Neftel_2019_10x Myeloid_cells	1.11143	1.49186	0.1	1000
NGFRAP1		0.287902	-0.617665	0.14	0.165	1	mg-TAM 1	All other cells	ND1_7.Neftel_2019_10x Myeloid_cells	0.187986	0.434097	0.1	1000
C1orf61		0.405139	-0.419005	0.218	0.204	1	mg-TAM 1	All other cells	ND1_7.Neftel_2019_10x Myeloid_cells	0.363233	0.604322	0.1	1000
CTA-29F11.1		0.792034	-0.438406	0.221	0.201	1	mg-TAM 1	All other cells	ND1_7.Neftel_2019_10x Myeloid_cells	0.324806	0.558548	0.1	1000
H2AFZ		0.397436	-0.35639	0.799	0.628	1	mg-TAM 1	All other cells	ND1_7.Neftel_2019_10x Myeloid_cells	2.12725	3.08088	0.1	1000
ADRBK1		0.309735	-0.281311	0.208	0.18	1	mg-TAM 1	All other cells	ND1_7.Neftel_2019_10x Myeloid_cells	0.241097	0.351908	0.1	1000
LINC00936		0.0339034	-0.505269	0.33	0.325	1	mg-TAM 1	All other cells	ND1_7.Neftel_2019_10x Myeloid_cells	0.569418	1.00951	0.1	1000
CXorf21		0.00841667	-0.271202	0.241	0.197	1	mg-TAM 1	All other cells	ND1_7.Neftel_2019_10x Myeloid_cells	0.326763	0.459717	0.1	1000
CH17-373J23.1		0.0645701	-0.256484	0.302	0.234	1	mg-TAM 1	All other cells	ND1_7.Neftel_2019_10x Myeloid_cells	0.596136	0.799671	0.1	1000
FAM49A		0.165705	-0.441235	0.193	0.202	1	mg-TAM 1	All other cells	ND1_7.Neftel_2019_10x Myeloid_cells	0.227759	0.409543	0.1	1000
WBP5		0.436591	-0.542512	0.138	0.132	1	mg-TAM 1	All other cells	ND1_7.Neftel_2019_10x Myeloid_cells	0.177107	0.376714	0.1	1000
CTD-3252C9.4		0.83024	-0.439034	0.191	0.18	1	mg-TAM 1	All other cells	ND1_7.Neftel_2019_10x Myeloid_cells	0.262586	0.462447	0.1	1000
HIST1H4C		0.173108	-0.381413	0.398	0.29	1	mg-TAM 1	All other cells	ND1_7.Neftel_2019_10x Myeloid_cells	0.592044	0.913396	0.1	1000
AHSA2		0.195543	-0.286742	0.105	0.098	1	mg-TAM 1	All other cells	ND1_7.Neftel_2019_10x Myeloid_cells	0.118724	0.191358	0.1	1000
RP11-796E2.4		0.107367	-0.308325	0.156	0.131	1	mg-TAM 1	All other cells	ND1_7.Neftel_2019_10x Myeloid_cells	0.222822	0.339407	0.1	1000

## Sheet: mg-TAM 2
gene	description	p_val	avg_logFC	pct.1	pct.2	p_val_adj	cluster.1	cluster.2	dataset	ave.norm.expr.1	ave.norm.expr.2	pseudocount	max.cells.per.ident
ITM2B	integral membrane protein 2B [Source:HGNC Symbol;Acc:HGNC:6174]	3.76042e-93	0.576719	0.985	0.908	9.39278e-89	mg-TAM 2	All other cells	ND1_7.Neftel_2019_10x Myeloid_cells	28.3885	15.9031	0.1	1000
VIM	vimentin [Source:HGNC Symbol;Acc:HGNC:12692]	7.40442e-82	-1.50148	0.406	0.732	1.84948e-77	mg-TAM 2	All other cells	ND1_7.Neftel_2019_10x Myeloid_cells	2.6764	12.3614	0.1	1000
IFNGR1	interferon gamma receptor 1 [Source:HGNC Symbol;Acc:HGNC:5439]	1.55638e-72	0.790944	0.886	0.716	3.88754e-68	mg-TAM 2	All other cells	ND1_7.Neftel_2019_10x Myeloid_cells	7.92892	3.54045	0.1	1000
CX3CR1	C-X3-C motif chemokine receptor 1 [Source:HGNC Symbol;Acc:HGNC:2558]	3.0818e-71	0.987693	0.804	0.468	7.69771e-67	mg-TAM 2	All other cells	ND1_7.Neftel_2019_10x Myeloid_cells	5.0641	1.82329	0.1	1000
PLD4	phospholipase D family member 4 [Source:HGNC Symbol;Acc:HGNC:23792]	3.38746e-69	0.800654	0.861	0.582	8.4612e-65	mg-TAM 2	All other cells	ND1_7.Neftel_2019_10x Myeloid_cells	5.87538	2.58316	0.1	1000
ANXA1	annexin A1 [Source:HGNC Symbol;Acc:HGNC:533]	5.22092e-69	-1.75628	0.115	0.452	1.30408e-64	mg-TAM 2	All other cells	ND1_7.Neftel_2019_10x Myeloid_cells	0.412348	2.86694	0.1	1000
S100A10	S100 calcium binding protein A10 [Source:HGNC Symbol;Acc:HGNC:10487]	1.51695e-67	-1.9724	0.194	0.558	3.78904e-63	mg-TAM 2	All other cells	ND1_7.Neftel_2019_10x Myeloid_cells	0.64416	5.24897	0.1	1000
RNASET2	ribonuclease T2 [Source:HGNC Symbol;Acc:HGNC:21686]	9.35904e-67	0.499057	0.983	0.908	2.3377e-62	mg-TAM 2	All other cells	ND1_7.Neftel_2019_10x Myeloid_cells	24.8784	15.0645	0.1	1000
BHLHE41	basic helix-loop-helix family member e41 [Source:HGNC Symbol;Acc:HGNC:16617]	5.41051e-66	0.868688	0.707	0.425	1.35144e-61	mg-TAM 2	All other cells	ND1_7.Neftel_2019_10x Myeloid_cells	3.38559	1.36221	0.1	1000
PLAUR	plasminogen activator, urokinase receptor [Source:HGNC Symbol;Acc:HGNC:9053]	4.1888e-65	-1.49386	0.324	0.678	1.04628e-60	mg-TAM 2	All other cells	ND1_7.Neftel_2019_10x Myeloid_cells	1.12427	5.35325	0.1	1000
TREM2	triggering receptor expressed on myeloid cells 2 [Source:HGNC Symbol;Acc:HGNC:17761]	1.43135e-62	0.423332	0.983	0.865	3.57523e-58	mg-TAM 2	All other cells	ND1_7.Neftel_2019_10x Myeloid_cells	18.1521	11.8526	0.1	1000
RGS10	regulator of G protein signaling 10 [Source:HGNC Symbol;Acc:HGNC:9992]	3.89984e-62	0.486904	0.949	0.854	9.74103e-58	mg-TAM 2	All other cells	ND1_7.Neftel_2019_10x Myeloid_cells	10.3376	6.31415	0.1	1000
A2M	alpha-2-macroglobulin [Source:HGNC Symbol;Acc:HGNC:7]	1.51669e-61	0.547447	0.954	0.791	3.78838e-57	mg-TAM 2	All other cells	ND1_7.Neftel_2019_10x Myeloid_cells	9.20739	5.28362	0.1	1000
GPR34	G protein-coupled receptor 34 [Source:HGNC Symbol;Acc:HGNC:4490]	2.21809e-61	0.603301	0.906	0.71	5.54034e-57	mg-TAM 2	All other cells	ND1_7.Neftel_2019_10x Myeloid_cells	6.79918	3.67387	0.1	1000
S100A6	S100 calcium binding protein A6 [Source:HGNC Symbol;Acc:HGNC:10496]	2.54998e-60	-1.28488	0.36	0.66	6.36933e-56	mg-TAM 2	All other cells	ND1_7.Neftel_2019_10x Myeloid_cells	1.777	6.68392	0.1	1000
FTL	ferritin light chain [Source:HGNC Symbol;Acc:HGNC:3999]	8.37214e-60	-0.607803	1	1	2.09119e-55	mg-TAM 2	All other cells	ND1_7.Neftel_2019_10x Myeloid_cells	201.717	370.516	0.1	1000
RP11-552D4.1		7.8557e-59	0.816522	0.758	0.452	1.9622e-54	mg-TAM 2	All other cells	ND1_7.Neftel_2019_10x Myeloid_cells	3.86558	1.65265	0.1	1000
DHRS9	dehydrogenase/reductase 9 [Source:HGNC Symbol;Acc:HGNC:16888]	3.22058e-58	1.20295	0.568	0.217	8.04436e-54	mg-TAM 2	All other cells	ND1_7.Neftel_2019_10x Myeloid_cells	2.90802	0.803331	0.1	1000
NAMPT	nicotinamide phosphoribosyltransferase [Source:HGNC Symbol;Acc:HGNC:30092]	8.417e-58	-1.36026	0.182	0.528	2.1024e-53	mg-TAM 2	All other cells	ND1_7.Neftel_2019_10x Myeloid_cells	0.52007	2.31653	0.1	1000
NAP1L1	nucleosome assembly protein 1 like 1 [Source:HGNC Symbol;Acc:HGNC:7637]	5.50717e-56	0.660157	0.875	0.748	1.37558e-51	mg-TAM 2	All other cells	ND1_7.Neftel_2019_10x Myeloid_cells	9.0024	4.60385	0.1	1000
LGALS1	galectin 1 [Source:HGNC Symbol;Acc:HGNC:6561]	2.76171e-54	-1.14503	0.724	0.847	6.89819e-50	mg-TAM 2	All other cells	ND1_7.Neftel_2019_10x Myeloid_cells	5.19836	16.5502	0.1	1000
SRGN	serglycin [Source:HGNC Symbol;Acc:HGNC:9361]	4.755e-53	-0.629703	0.978	0.973	1.1877e-48	mg-TAM 2	All other cells	ND1_7.Neftel_2019_10x Myeloid_cells	15.2883	28.7846	0.1	1000
S100A4	S100 calcium binding protein A4 [Source:HGNC Symbol;Acc:HGNC:10494]	7.15391e-52	-1.16676	0.443	0.715	1.7869e-47	mg-TAM 2	All other cells	ND1_7.Neftel_2019_10x Myeloid_cells	2.70665	8.91375	0.1	1000
APBB1IP	amyloid beta precursor protein binding family B member 1 interacting protein [Source:HGNC Symbol;Acc:HGNC:17379]	8.57572e-52	0.665796	0.843	0.643	2.14204e-47	mg-TAM 2	All other cells	ND1_7.Neftel_2019_10x Myeloid_cells	4.94962	2.49482	0.1	1000
CD44	CD44 molecule (Indian blood group) [Source:HGNC Symbol;Acc:HGNC:1681]	4.85119e-51	-1.53611	0.059	0.313	1.21173e-46	mg-TAM 2	All other cells	ND1_7.Neftel_2019_10x Myeloid_cells	0.135047	0.992144	0.1	1000
APMAP	adipocyte plasma membrane associated protein [Source:HGNC Symbol;Acc:HGNC:13238]	6.90854e-51	0.693112	0.737	0.533	1.72561e-46	mg-TAM 2	All other cells	ND1_7.Neftel_2019_10x Myeloid_cells	3.37095	1.63554	0.1	1000
TGFBI	transforming growth factor beta induced [Source:HGNC Symbol;Acc:HGNC:11771]	1.07676e-50	-1.67792	0.121	0.417	2.68954e-46	mg-TAM 2	All other cells	ND1_7.Neftel_2019_10x Myeloid_cells	0.328271	2.19313	0.1	1000
FTH1	ferritin heavy chain 1 [Source:HGNC Symbol;Acc:HGNC:3976]	7.41337e-49	-0.712786	0.994	0.965	1.85171e-44	mg-TAM 2	All other cells	ND1_7.Neftel_2019_10x Myeloid_cells	88.1996	180.002	0.1	1000
IGSF6	immunoglobulin superfamily member 6 [Source:HGNC Symbol;Acc:HGNC:5953]	1.45954e-48	0.606415	0.802	0.594	3.64564e-44	mg-TAM 2	All other cells	ND1_7.Neftel_2019_10x Myeloid_cells	4.57807	2.45096	0.1	1000
TMIGD3	transmembrane and immunoglobulin domain containing 3 [Source:HGNC Symbol;Acc:HGNC:51375]	2.641e-47	0.613958	0.794	0.535	6.59668e-43	mg-TAM 2	All other cells	ND1_7.Neftel_2019_10x Myeloid_cells	7.47338	3.99875	0.1	1000
CD37	CD37 molecule [Source:HGNC Symbol;Acc:HGNC:1666]	2.81453e-47	0.418725	0.913	0.795	7.03013e-43	mg-TAM 2	All other cells	ND1_7.Neftel_2019_10x Myeloid_cells	6.43715	4.20069	0.1	1000
TAGLN2	transgelin 2 [Source:HGNC Symbol;Acc:HGNC:11554]	2.53431e-46	-1.05167	0.181	0.439	6.3302e-42	mg-TAM 2	All other cells	ND1_7.Neftel_2019_10x Myeloid_cells	0.429343	1.4152	0.1	1000
CSF1R	colony stimulating factor 1 receptor [Source:HGNC Symbol;Acc:HGNC:2433]	1.07039e-45	0.540989	0.906	0.747	2.67363e-41	mg-TAM 2	All other cells	ND1_7.Neftel_2019_10x Myeloid_cells	6.02376	3.46508	0.1	1000
SLC1A3	solute carrier family 1 member 3 [Source:HGNC Symbol;Acc:HGNC:10941]	1.95974e-45	0.569369	0.858	0.649	4.89504e-41	mg-TAM 2	All other cells	ND1_7.Neftel_2019_10x Myeloid_cells	5.1845	2.8904	0.1	1000
SOCS3	suppressor of cytokine signaling 3 [Source:HGNC Symbol;Acc:HGNC:19391]	3.04109e-45	-1.40508	0.072	0.336	7.59603e-41	mg-TAM 2	All other cells	ND1_7.Neftel_2019_10x Myeloid_cells	0.213377	1.17728	0.1	1000
SORL1	sortilin related receptor 1 [Source:HGNC Symbol;Acc:HGNC:11185]	6.11441e-45	0.69078	0.779	0.561	1.52726e-40	mg-TAM 2	All other cells	ND1_7.Neftel_2019_10x Myeloid_cells	3.65472	1.78181	0.1	1000
SUSD3	sushi domain containing 3 [Source:HGNC Symbol;Acc:HGNC:28391]	2.0962e-44	0.846746	0.619	0.379	5.23588e-40	mg-TAM 2	All other cells	ND1_7.Neftel_2019_10x Myeloid_cells	2.40304	0.973325	0.1	1000
RPL23	ribosomal protein L23 [Source:HGNC Symbol;Acc:HGNC:10316]	1.16022e-43	0.382158	0.959	0.909	2.898e-39	mg-TAM 2	All other cells	ND1_7.Neftel_2019_10x Myeloid_cells	18.0194	12.2645	0.1	1000
LGALS3	galectin 3 [Source:HGNC Symbol;Acc:HGNC:6563]	9.49954e-43	-1.66957	0.119	0.398	2.37279e-38	mg-TAM 2	All other cells	ND1_7.Neftel_2019_10x Myeloid_cells	0.310273	2.0785	0.1	1000
CD163	CD163 molecule [Source:HGNC Symbol;Acc:HGNC:1631]	4.38988e-42	-0.843607	0.213	0.536	1.0965e-37	mg-TAM 2	All other cells	ND1_7.Neftel_2019_10x Myeloid_cells	1.16621	2.84361	0.1	1000
CALM2	calmodulin 2 [Source:HGNC Symbol;Acc:HGNC:1445]	4.97481e-42	0.385561	0.97	0.896	1.24261e-37	mg-TAM 2	All other cells	ND1_7.Neftel_2019_10x Myeloid_cells	13.7488	9.31813	0.1	1000
C10orf54		8.60824e-42	0.551167	0.888	0.742	2.15017e-37	mg-TAM 2	All other cells	ND1_7.Neftel_2019_10x Myeloid_cells	6.20733	3.53477	0.1	1000
ARL6IP5	ADP ribosylation factor like GTPase 6 interacting protein 5 [Source:HGNC Symbol;Acc:HGNC:16937]	2.65164e-41	0.522494	0.83	0.688	6.62327e-37	mg-TAM 2	All other cells	ND1_7.Neftel_2019_10x Myeloid_cells	4.23916	2.47329	0.1	1000
SAT1	spermidine/spermine N1-acetyltransferase 1 [Source:HGNC Symbol;Acc:HGNC:10540]	4.19487e-41	-0.489654	0.996	0.987	1.04779e-36	mg-TAM 2	All other cells	ND1_7.Neftel_2019_10x Myeloid_cells	29.9032	48.8578	0.1	1000
P2RY13	purinergic receptor P2Y13 [Source:HGNC Symbol;Acc:HGNC:4537]	6.46203e-41	0.908317	0.537	0.308	1.61409e-36	mg-TAM 2	All other cells	ND1_7.Neftel_2019_10x Myeloid_cells	2.12362	0.796568	0.1	1000
PLIN2	perilipin 2 [Source:HGNC Symbol;Acc:HGNC:248]	1.37676e-40	-1.65881	0.287	0.553	3.43888e-36	mg-TAM 2	All other cells	ND1_7.Neftel_2019_10x Myeloid_cells	0.9115	5.21346	0.1	1000
ISCU	iron-sulfur cluster assembly enzyme [Source:HGNC Symbol;Acc:HGNC:29882]	2.90173e-40	0.476199	0.823	0.687	7.24794e-36	mg-TAM 2	All other cells	ND1_7.Neftel_2019_10x Myeloid_cells	4.17802	2.55725	0.1	1000
RPL21	ribosomal protein L21 [Source:HGNC Symbol;Acc:HGNC:10313]	3.54068e-40	0.303938	0.976	0.921	8.84391e-36	mg-TAM 2	All other cells	ND1_7.Neftel_2019_10x Myeloid_cells	39.8417	29.3732	0.1	1000
SOD2	superoxide dismutase 2 [Source:HGNC Symbol;Acc:HGNC:11180]	6.91312e-40	-1.41355	0.308	0.609	1.72676e-35	mg-TAM 2	All other cells	ND1_7.Neftel_2019_10x Myeloid_cells	0.891904	3.97725	0.1	1000
CKB	creatine kinase B [Source:HGNC Symbol;Acc:HGNC:1991]	2.10671e-39	0.870806	0.631	0.408	5.26213e-35	mg-TAM 2	All other cells	ND1_7.Neftel_2019_10x Myeloid_cells	3.65787	1.4731	0.1	1000
MEF2C	myocyte enhancer factor 2C [Source:HGNC Symbol;Acc:HGNC:6996]	2.61796e-39	0.583627	0.845	0.656	6.53915e-35	mg-TAM 2	All other cells	ND1_7.Neftel_2019_10x Myeloid_cells	4.68974	2.57206	0.1	1000
EPB41L2	erythrocyte membrane protein band 4.1 like 2 [Source:HGNC Symbol;Acc:HGNC:3379]	3.53334e-39	0.613393	0.751	0.557	8.82557e-35	mg-TAM 2	All other cells	ND1_7.Neftel_2019_10x Myeloid_cells	3.37438	1.78141	0.1	1000
FAM105A		1.88291e-38	0.754752	0.671	0.465	4.70313e-34	mg-TAM 2	All other cells	ND1_7.Neftel_2019_10x Myeloid_cells	2.56513	1.15295	0.1	1000
HLA-E	major histocompatibility complex, class I, E [Source:HGNC Symbol;Acc:HGNC:4962]	1.99691e-38	0.269459	0.98	0.915	4.98789e-34	mg-TAM 2	All other cells	ND1_7.Neftel_2019_10x Myeloid_cells	11.4772	8.74257	0.1	1000
BIN1	bridging integrator 1 [Source:HGNC Symbol;Acc:HGNC:1052]	2.55532e-38	0.538216	0.865	0.662	6.38267e-34	mg-TAM 2	All other cells	ND1_7.Neftel_2019_10x Myeloid_cells	7.36133	4.25584	0.1	1000
FAM212A		7.9079e-38	1.05239	0.389	0.165	1.97524e-33	mg-TAM 2	All other cells	ND1_7.Neftel_2019_10x Myeloid_cells	1.10554	0.320856	0.1	1000
CYFIP1	cytoplasmic FMR1 interacting protein 1 [Source:HGNC Symbol;Acc:HGNC:13759]	8.23865e-38	0.599646	0.775	0.599	2.05785e-33	mg-TAM 2	All other cells	ND1_7.Neftel_2019_10x Myeloid_cells	3.71682	1.99546	0.1	1000
LDHA	lactate dehydrogenase A [Source:HGNC Symbol;Acc:HGNC:6535]	8.44007e-38	-0.997867	0.638	0.78	2.10816e-33	mg-TAM 2	All other cells	ND1_7.Neftel_2019_10x Myeloid_cells	2.40052	6.68263	0.1	1000
NR4A3	nuclear receptor subfamily 4 group A member 3 [Source:HGNC Symbol;Acc:HGNC:7982]	8.78247e-38	-1.2457	0.09	0.3	2.19369e-33	mg-TAM 2	All other cells	ND1_7.Neftel_2019_10x Myeloid_cells	0.308386	1.31929	0.1	1000
C5AR1	complement C5a receptor 1 [Source:HGNC Symbol;Acc:HGNC:1338]	1.1478e-37	-0.862976	0.263	0.538	2.86697e-33	mg-TAM 2	All other cells	ND1_7.Neftel_2019_10x Myeloid_cells	0.911684	2.2979	0.1	1000
LILRB4	leukocyte immunoglobulin like receptor B4 [Source:HGNC Symbol;Acc:HGNC:6608]	2.14586e-37	0.466512	0.884	0.737	5.35993e-33	mg-TAM 2	All other cells	ND1_7.Neftel_2019_10x Myeloid_cells	5.70768	3.5425	0.1	1000
SELPLG	selectin P ligand [Source:HGNC Symbol;Acc:HGNC:10722]	2.70089e-37	0.768656	0.569	0.369	6.74628e-33	mg-TAM 2	All other cells	ND1_7.Neftel_2019_10x Myeloid_cells	2.17318	0.953929	0.1	1000
OLFML3	olfactomedin like 3 [Source:HGNC Symbol;Acc:HGNC:24956]	4.40064e-37	0.562277	0.844	0.651	1.09919e-32	mg-TAM 2	All other cells	ND1_7.Neftel_2019_10x Myeloid_cells	5.82013	3.27394	0.1	1000
MALAT1	metastasis associated lung adenocarcinoma transcript 1 [Source:HGNC Symbol;Acc:HGNC:29665]	7.40273e-37	0.358727	0.998	0.99	1.84905e-32	mg-TAM 2	All other cells	ND1_7.Neftel_2019_10x Myeloid_cells	431.766	301.586	0.1	1000
SDCCAG8	SHH signaling and ciliogenesis regulator SDCCAG8 [Source:HGNC Symbol;Acc:HGNC:10671]	1.94675e-36	0.665535	0.609	0.43	4.8626e-32	mg-TAM 2	All other cells	ND1_7.Neftel_2019_10x Myeloid_cells	2.17626	1.07	0.1	1000
LPAR5	lysophosphatidic acid receptor 5 [Source:HGNC Symbol;Acc:HGNC:13307]	3.50043e-35	0.760823	0.594	0.382	8.74337e-31	mg-TAM 2	All other cells	ND1_7.Neftel_2019_10x Myeloid_cells	2.02369	0.892359	0.1	1000
HLA-DMB	major histocompatibility complex, class II, DM beta [Source:HGNC Symbol;Acc:HGNC:4935]	1.56221e-34	0.376206	0.929	0.773	3.9021e-30	mg-TAM 2	All other cells	ND1_7.Neftel_2019_10x Myeloid_cells	7.64728	5.21821	0.1	1000
ANXA2	annexin A2 [Source:HGNC Symbol;Acc:HGNC:537]	4.01912e-34	-0.848852	0.445	0.65	1.0039e-29	mg-TAM 2	All other cells	ND1_7.Neftel_2019_10x Myeloid_cells	1.49074	3.61749	0.1	1000
LPCAT2	lysophosphatidylcholine acyltransferase 2 [Source:HGNC Symbol;Acc:HGNC:26032]	4.34298e-34	0.626402	0.698	0.524	1.08479e-29	mg-TAM 2	All other cells	ND1_7.Neftel_2019_10x Myeloid_cells	2.71451	1.40439	0.1	1000
CD53	CD53 molecule [Source:HGNC Symbol;Acc:HGNC:1686]	5.76348e-34	0.396737	0.894	0.784	1.4396e-29	mg-TAM 2	All other cells	ND1_7.Neftel_2019_10x Myeloid_cells	5.86967	3.91467	0.1	1000
GADD45B	growth arrest and DNA damage inducible beta [Source:HGNC Symbol;Acc:HGNC:4096]	7.91401e-34	-0.884693	0.334	0.609	1.97676e-29	mg-TAM 2	All other cells	ND1_7.Neftel_2019_10x Myeloid_cells	2.00134	4.98995	0.1	1000
ATF3	activating transcription factor 3 [Source:HGNC Symbol;Acc:HGNC:785]	1.27287e-33	-1.10748	0.167	0.433	3.17937e-29	mg-TAM 2	All other cells	ND1_7.Neftel_2019_10x Myeloid_cells	0.750574	2.47444	0.1	1000
C12orf75	chromosome 12 open reading frame 75 [Source:HGNC Symbol;Acc:HGNC:35164]	2.57886e-33	0.802498	0.563	0.338	6.44146e-29	mg-TAM 2	All other cells	ND1_7.Neftel_2019_10x Myeloid_cells	2.3175	0.983543	0.1	1000
PIH1D1	PIH1 domain containing 1 [Source:HGNC Symbol;Acc:HGNC:26075]	6.93988e-33	0.688109	0.624	0.441	1.73344e-28	mg-TAM 2	All other cells	ND1_7.Neftel_2019_10x Myeloid_cells	2.63235	1.27308	0.1	1000
LMNA	lamin A/C [Source:HGNC Symbol;Acc:HGNC:6636]	9.32307e-33	-1.52442	0.035	0.222	2.32872e-28	mg-TAM 2	All other cells	ND1_7.Neftel_2019_10x Myeloid_cells	0.0887501	0.766829	0.1	1000
HBEGF	heparin binding EGF like growth factor [Source:HGNC Symbol;Acc:HGNC:3059]	2.12745e-32	-1.22115	0.11	0.342	5.31394e-28	mg-TAM 2	All other cells	ND1_7.Neftel_2019_10x Myeloid_cells	0.346021	1.4125	0.1	1000
CSF2RA	colony stimulating factor 2 receptor subunit alpha [Source:HGNC Symbol;Acc:HGNC:2435]	8.50929e-32	0.572016	0.728	0.55	2.12545e-27	mg-TAM 2	All other cells	ND1_7.Neftel_2019_10x Myeloid_cells	3.02987	1.66646	0.1	1000
LY86	lymphocyte antigen 86 [Source:HGNC Symbol;Acc:HGNC:16837]	9.73467e-32	0.320838	0.855	0.756	2.43153e-27	mg-TAM 2	All other cells	ND1_7.Neftel_2019_10x Myeloid_cells	4.95194	3.56539	0.1	1000
RPL13A	ribosomal protein L13a [Source:HGNC Symbol;Acc:HGNC:10304]	1.1273e-31	0.298411	0.99	0.966	2.81578e-27	mg-TAM 2	All other cells	ND1_7.Neftel_2019_10x Myeloid_cells	47.0407	34.8782	0.1	1000
PTAFR	platelet activating factor receptor [Source:HGNC Symbol;Acc:HGNC:9582]	1.51727e-31	0.699863	0.621	0.442	3.78985e-27	mg-TAM 2	All other cells	ND1_7.Neftel_2019_10x Myeloid_cells	2.31796	1.10089	0.1	1000
CNPY3	canopy FGF signaling regulator 3 [Source:HGNC Symbol;Acc:HGNC:11968]	1.61694e-31	0.43591	0.842	0.729	4.03879e-27	mg-TAM 2	All other cells	ND1_7.Neftel_2019_10x Myeloid_cells	4.24285	2.70842	0.1	1000
RPS20	ribosomal protein S20 [Source:HGNC Symbol;Acc:HGNC:10405]	3.8479e-31	0.340088	0.955	0.903	9.61129e-27	mg-TAM 2	All other cells	ND1_7.Neftel_2019_10x Myeloid_cells	24.231	17.2166	0.1	1000
ARL4C	ADP ribosylation factor like GTPase 4C [Source:HGNC Symbol;Acc:HGNC:698]	6.51305e-31	-1.14024	0.05	0.231	1.62683e-26	mg-TAM 2	All other cells	ND1_7.Neftel_2019_10x Myeloid_cells	0.12763	0.611919	0.1	1000
CREM	cAMP responsive element modulator [Source:HGNC Symbol;Acc:HGNC:2352]	6.59218e-31	-1.04808	0.231	0.479	1.6466e-26	mg-TAM 2	All other cells	ND1_7.Neftel_2019_10x Myeloid_cells	0.671512	2.10047	0.1	1000
EVI2B	ecotropic viral integration site 2B [Source:HGNC Symbol;Acc:HGNC:3500]	1.72153e-30	0.509778	0.653	0.517	4.30004e-26	mg-TAM 2	All other cells	ND1_7.Neftel_2019_10x Myeloid_cells	2.56517	1.50078	0.1	1000
G0S2	G0/G1 switch 2 [Source:HGNC Symbol;Acc:HGNC:30229]	3.82629e-30	-2.44773	0.06	0.243	9.55731e-26	mg-TAM 2	All other cells	ND1_7.Neftel_2019_10x Myeloid_cells	0.21931	3.59188	0.1	1000
METRNL	meteorin like, glial cell differentiation regulator [Source:HGNC Symbol;Acc:HGNC:27584]	4.17267e-30	-1.14254	0.032	0.181	1.04225e-25	mg-TAM 2	All other cells	ND1_7.Neftel_2019_10x Myeloid_cells	0.0657111	0.419456	0.1	1000
PNISR	PNN interacting serine and arginine rich protein [Source:HGNC Symbol;Acc:HGNC:21222]	1.00879e-29	0.611426	0.684	0.53	2.51975e-25	mg-TAM 2	All other cells	ND1_7.Neftel_2019_10x Myeloid_cells	2.67789	1.40722	0.1	1000
TMEM119	transmembrane protein 119 [Source:HGNC Symbol;Acc:HGNC:27884]	1.30951e-29	0.684563	0.551	0.345	3.2709e-25	mg-TAM 2	All other cells	ND1_7.Neftel_2019_10x Myeloid_cells	1.81771	0.867123	0.1	1000
FCGR2B	Fc fragment of IgG receptor IIb [Source:HGNC Symbol;Acc:HGNC:3618]	1.51224e-29	-1.20689	0.061	0.241	3.77727e-25	mg-TAM 2	All other cells	ND1_7.Neftel_2019_10x Myeloid_cells	0.19893	0.899348	0.1	1000
GLUL	glutamate-ammonia ligase [Source:HGNC Symbol;Acc:HGNC:4341]	2.90457e-29	-0.677751	0.775	0.861	7.25503e-25	mg-TAM 2	All other cells	ND1_7.Neftel_2019_10x Myeloid_cells	4.23165	8.43094	0.1	1000
IL1B	interleukin 1 beta [Source:HGNC Symbol;Acc:HGNC:5992]	3.1959e-29	-1.42809	0.309	0.51	7.98271e-25	mg-TAM 2	All other cells	ND1_7.Neftel_2019_10x Myeloid_cells	1.69422	7.3832	0.1	1000
MT2A	metallothionein 2A [Source:HGNC Symbol;Acc:HGNC:7406]	5.52786e-29	-1.50057	0.468	0.689	1.38075e-24	mg-TAM 2	All other cells	ND1_7.Neftel_2019_10x Myeloid_cells	3.35699	15.4019	0.1	1000
LTC4S	leukotriene C4 synthase [Source:HGNC Symbol;Acc:HGNC:6719]	7.65388e-29	0.537015	0.686	0.511	1.91179e-24	mg-TAM 2	All other cells	ND1_7.Neftel_2019_10x Myeloid_cells	2.74029	1.56012	0.1	1000
LYZ	lysozyme [Source:HGNC Symbol;Acc:HGNC:6740]	1.26933e-28	-1.42102	0.347	0.56	3.17053e-24	mg-TAM 2	All other cells	ND1_7.Neftel_2019_10x Myeloid_cells	1.28268	5.62613	0.1	1000
RGCC	regulator of cell cycle [Source:HGNC Symbol;Acc:HGNC:20369]	1.32881e-28	-1.6137	0.113	0.319	3.31911e-24	mg-TAM 2	All other cells	ND1_7.Neftel_2019_10x Myeloid_cells	0.458976	2.70682	0.1	1000
N4BP2L2	NEDD4 binding protein 2 like 2 [Source:HGNC Symbol;Acc:HGNC:26916]	1.57326e-28	0.574264	0.676	0.525	3.92968e-24	mg-TAM 2	All other cells	ND1_7.Neftel_2019_10x Myeloid_cells	2.49858	1.36331	0.1	1000
ST14	ST14 transmembrane serine protease matriptase [Source:HGNC Symbol;Acc:HGNC:11344]	1.62983e-28	-0.573381	0.076	0.218	4.07099e-24	mg-TAM 2	All other cells	ND1_7.Neftel_2019_10x Myeloid_cells	0.17645	0.390493	0.1	1000
S100A9	S100 calcium binding protein A9 [Source:HGNC Symbol;Acc:HGNC:10499]	1.71829e-28	-1.96919	0.415	0.589	4.29196e-24	mg-TAM 2	All other cells	ND1_7.Neftel_2019_10x Myeloid_cells	1.70573	12.8379	0.1	1000
PHLDA1	pleckstrin homology like domain family A member 1 [Source:HGNC Symbol;Acc:HGNC:8933]	2.20212e-28	-1.31164	0.046	0.208	5.50046e-24	mg-TAM 2	All other cells	ND1_7.Neftel_2019_10x Myeloid_cells	0.102692	0.652447	0.1	1000
TPM4	tropomyosin 4 [Source:HGNC Symbol;Acc:HGNC:12013]	3.14505e-28	-0.72258	0.268	0.504	7.85569e-24	mg-TAM 2	All other cells	ND1_7.Neftel_2019_10x Myeloid_cells	0.639535	1.42325	0.1	1000
SHTN1	shootin 1 [Source:HGNC Symbol;Acc:HGNC:29319]	5.57438e-28	0.738999	0.517	0.331	1.39237e-23	mg-TAM 2	All other cells	ND1_7.Neftel_2019_10x Myeloid_cells	1.71649	0.767539	0.1	1000
PMP22	peripheral myelin protein 22 [Source:HGNC Symbol;Acc:HGNC:9118]	1.11132e-27	-1.20265	0.058	0.235	2.77584e-23	mg-TAM 2	All other cells	ND1_7.Neftel_2019_10x Myeloid_cells	0.125768	0.651563	0.1	1000
ADORA3	adenosine A3 receptor [Source:HGNC Symbol;Acc:HGNC:268]	1.11385e-27	0.404457	0.736	0.574	2.78218e-23	mg-TAM 2	All other cells	ND1_7.Neftel_2019_10x Myeloid_cells	3.30493	2.17224	0.1	1000
SYNDIG1	synapse differentiation inducing 1 [Source:HGNC Symbol;Acc:HGNC:15885]	1.73385e-27	0.87315	0.464	0.241	4.3308e-23	mg-TAM 2	All other cells	ND1_7.Neftel_2019_10x Myeloid_cells	1.37552	0.516229	0.1	1000
SLC16A10	solute carrier family 16 member 10 [Source:HGNC Symbol;Acc:HGNC:17027]	1.93052e-27	-1.34118	0.006	0.123	4.82204e-23	mg-TAM 2	All other cells	ND1_7.Neftel_2019_10x Myeloid_cells	0.0156904	0.342348	0.1	1000
RAC1	Rac family small GTPase 1 [Source:HGNC Symbol;Acc:HGNC:9801]	2.3229e-27	0.374774	0.921	0.835	5.80214e-23	mg-TAM 2	All other cells	ND1_7.Neftel_2019_10x Myeloid_cells	11.7899	8.07366	0.1	1000
THBD	thrombomodulin [Source:HGNC Symbol;Acc:HGNC:11784]	5.07241e-27	-1.18673	0.029	0.175	1.26699e-22	mg-TAM 2	All other cells	ND1_7.Neftel_2019_10x Myeloid_cells	0.0808044	0.49238	0.1	1000
DHRS7	dehydrogenase/reductase 7 [Source:HGNC Symbol;Acc:HGNC:21524]	5.4218e-27	0.315792	0.793	0.694	1.35426e-22	mg-TAM 2	All other cells	ND1_7.Neftel_2019_10x Myeloid_cells	3.63647	2.62467	0.1	1000
STAB1	stabilin 1 [Source:HGNC Symbol;Acc:HGNC:18628]	6.97644e-27	-0.795317	0.22	0.431	1.74258e-22	mg-TAM 2	All other cells	ND1_7.Neftel_2019_10x Myeloid_cells	0.685329	1.63962	0.1	1000
CORO1A	coronin 1A [Source:HGNC Symbol;Acc:HGNC:2252]	8.21197e-27	0.369569	0.908	0.79	2.05119e-22	mg-TAM 2	All other cells	ND1_7.Neftel_2019_10x Myeloid_cells	6.98909	4.79879	0.1	1000
MXD1	MAX dimerization protein 1 [Source:HGNC Symbol;Acc:HGNC:6761]	9.33795e-27	-1.03001	0.033	0.179	2.33243e-22	mg-TAM 2	All other cells	ND1_7.Neftel_2019_10x Myeloid_cells	0.0808295	0.406519	0.1	1000
OFD1	OFD1 centriole and centriolar satellite protein [Source:HGNC Symbol;Acc:HGNC:2567]	1.12474e-26	0.673171	0.38	0.23	2.80938e-22	mg-TAM 2	All other cells	ND1_7.Neftel_2019_10x Myeloid_cells	1.04792	0.485541	0.1	1000
BLNK	B cell linker [Source:HGNC Symbol;Acc:HGNC:14211]	1.2643e-26	0.824052	0.461	0.273	3.15796e-22	mg-TAM 2	All other cells	ND1_7.Neftel_2019_10x Myeloid_cells	1.39357	0.555154	0.1	1000
SDC2	syndecan 2 [Source:HGNC Symbol;Acc:HGNC:10659]	1.70874e-26	-1.21735	0.02	0.137	4.2681e-22	mg-TAM 2	All other cells	ND1_7.Neftel_2019_10x Myeloid_cells	0.0372504	0.363662	0.1	1000
VEGFA	vascular endothelial growth factor A [Source:HGNC Symbol;Acc:HGNC:12680]	2.18085e-26	-1.23089	0.027	0.17	5.44734e-22	mg-TAM 2	All other cells	ND1_7.Neftel_2019_10x Myeloid_cells	0.0603865	0.449207	0.1	1000
C15orf48	chromosome 15 open reading frame 48 [Source:HGNC Symbol;Acc:HGNC:29898]	4.72278e-26	-1.86706	0.026	0.154	1.17966e-21	mg-TAM 2	All other cells	ND1_7.Neftel_2019_10x Myeloid_cells	0.059891	0.934374	0.1	1000
CIRBP	cold inducible RNA binding protein [Source:HGNC Symbol;Acc:HGNC:1982]	5.11721e-26	0.300419	0.876	0.803	1.27818e-21	mg-TAM 2	All other cells	ND1_7.Neftel_2019_10x Myeloid_cells	5.05818	3.71967	0.1	1000
ARHGAP24	Rho GTPase activating protein 24 [Source:HGNC Symbol;Acc:HGNC:25361]	5.34988e-26	0.663821	0.563	0.383	1.33629e-21	mg-TAM 2	All other cells	ND1_7.Neftel_2019_10x Myeloid_cells	1.9343	0.94742	0.1	1000
NAA20	N-alpha-acetyltransferase 20, NatB catalytic subunit [Source:HGNC Symbol;Acc:HGNC:15908]	5.37801e-26	0.503381	0.666	0.53	1.34332e-21	mg-TAM 2	All other cells	ND1_7.Neftel_2019_10x Myeloid_cells	2.65416	1.56484	0.1	1000
C1orf162	chromosome 1 open reading frame 162 [Source:HGNC Symbol;Acc:HGNC:28344]	6.84062e-26	-0.608464	0.492	0.698	1.70865e-21	mg-TAM 2	All other cells	ND1_7.Neftel_2019_10x Myeloid_cells	2.0196	3.79499	0.1	1000
FOSL2	FOS like 2, AP-1 transcription factor subunit [Source:HGNC Symbol;Acc:HGNC:3798]	6.98686e-26	-1.1338	0.03	0.189	1.74518e-21	mg-TAM 2	All other cells	ND1_7.Neftel_2019_10x Myeloid_cells	0.0711314	0.431779	0.1	1000
METTL7A	methyltransferase like 7A [Source:HGNC Symbol;Acc:HGNC:24550]	8.58568e-26	0.683328	0.501	0.336	2.14453e-21	mg-TAM 2	All other cells	ND1_7.Neftel_2019_10x Myeloid_cells	1.522	0.719001	0.1	1000
BCL2A1	BCL2 related protein A1 [Source:HGNC Symbol;Acc:HGNC:991]	8.90352e-26	-0.838058	0.286	0.497	2.22392e-21	mg-TAM 2	All other cells	ND1_7.Neftel_2019_10x Myeloid_cells	0.857858	2.11445	0.1	1000
FCGR1A	Fc fragment of IgG receptor Ia [Source:HGNC Symbol;Acc:HGNC:3613]	8.91559e-26	0.459526	0.848	0.693	2.22694e-21	mg-TAM 2	All other cells	ND1_7.Neftel_2019_10x Myeloid_cells	6.24992	3.9105	0.1	1000
ADM	adrenomedullin [Source:HGNC Symbol;Acc:HGNC:259]	9.60424e-26	-1.88221	0.016	0.142	2.39895e-21	mg-TAM 2	All other cells	ND1_7.Neftel_2019_10x Myeloid_cells	0.049571	0.882382	0.1	1000
WASF2	WASP family member 2 [Source:HGNC Symbol;Acc:HGNC:12733]	2.09721e-25	0.407887	0.686	0.587	5.2384e-21	mg-TAM 2	All other cells	ND1_7.Neftel_2019_10x Myeloid_cells	2.48146	1.61681	0.1	1000
LITAF	lipopolysaccharide induced TNF factor [Source:HGNC Symbol;Acc:HGNC:16841]	2.79891e-25	-0.695937	0.421	0.658	6.99112e-21	mg-TAM 2	All other cells	ND1_7.Neftel_2019_10x Myeloid_cells	1.32264	2.75324	0.1	1000
VCAN	versican [Source:HGNC Symbol;Acc:HGNC:2464]	5.32914e-25	-1.87008	0.01	0.114	1.33111e-20	mg-TAM 2	All other cells	ND1_7.Neftel_2019_10x Myeloid_cells	0.0216738	0.689521	0.1	1000
CYTL1	cytokine like 1 [Source:HGNC Symbol;Acc:HGNC:24435]	6.00296e-25	0.728211	0.457	0.275	1.49942e-20	mg-TAM 2	All other cells	ND1_7.Neftel_2019_10x Myeloid_cells	1.58169	0.711873	0.1	1000
EVL	Enah/Vasp-like [Source:HGNC Symbol;Acc:HGNC:20234]	6.57517e-25	0.532215	0.731	0.57	1.64235e-20	mg-TAM 2	All other cells	ND1_7.Neftel_2019_10x Myeloid_cells	2.99295	1.7165	0.1	1000
AREG	amphiregulin [Source:HGNC Symbol;Acc:HGNC:651]	7.10491e-25	-2.55728	0.053	0.208	1.77466e-20	mg-TAM 2	All other cells	ND1_7.Neftel_2019_10x Myeloid_cells	0.209713	3.89551	0.1	1000
TMBIM4	transmembrane BAX inhibitor motif containing 4 [Source:HGNC Symbol;Acc:HGNC:24257]	7.12639e-25	0.509896	0.502	0.334	1.78003e-20	mg-TAM 2	All other cells	ND1_7.Neftel_2019_10x Myeloid_cells	1.59316	0.916843	0.1	1000
TMSB10	thymosin beta 10 [Source:HGNC Symbol;Acc:HGNC:11879]	9.49954e-25	-0.260368	0.997	0.992	2.3728e-20	mg-TAM 2	All other cells	ND1_7.Neftel_2019_10x Myeloid_cells	37.1557	48.2358	0.1	1000
RPS17	ribosomal protein S17 [Source:HGNC Symbol;Acc:HGNC:10397]	1.8575e-24	0.331073	0.883	0.745	4.63967e-20	mg-TAM 2	All other cells	ND1_7.Neftel_2019_10x Myeloid_cells	17.2718	12.3756	0.1	1000
CTSD	cathepsin D [Source:HGNC Symbol;Acc:HGNC:2529]	2.53099e-24	-0.582502	0.853	0.884	6.32191e-20	mg-TAM 2	All other cells	ND1_7.Neftel_2019_10x Myeloid_cells	6.07484	10.9561	0.1	1000
IL1RN	interleukin 1 receptor antagonist [Source:HGNC Symbol;Acc:HGNC:6000]	2.54093e-24	-1.46106	0.023	0.135	6.34673e-20	mg-TAM 2	All other cells	ND1_7.Neftel_2019_10x Myeloid_cells	0.059472	0.587406	0.1	1000
AP005530.2		3.18712e-24	0.881695	0.341	0.161	7.96078e-20	mg-TAM 2	All other cells	ND1_7.Neftel_2019_10x Myeloid_cells	0.975664	0.345412	0.1	1000
SRGAP2	SLIT-ROBO Rho GTPase activating protein 2 [Source:HGNC Symbol;Acc:HGNC:19751]	3.28078e-24	0.747113	0.525	0.35	8.19474e-20	mg-TAM 2	All other cells	ND1_7.Neftel_2019_10x Myeloid_cells	1.80742	0.803606	0.1	1000
C3AR1	complement C3a receptor 1 [Source:HGNC Symbol;Acc:HGNC:1319]	3.76666e-24	0.471556	0.766	0.615	9.40837e-20	mg-TAM 2	All other cells	ND1_7.Neftel_2019_10x Myeloid_cells	3.72981	2.28992	0.1	1000
SH3BP5	SH3 domain binding protein 5 [Source:HGNC Symbol;Acc:HGNC:10827]	6.36265e-24	-0.950713	0.015	0.116	1.58926e-19	mg-TAM 2	All other cells	ND1_7.Neftel_2019_10x Myeloid_cells	0.033561	0.245596	0.1	1000
CSTA	cystatin A [Source:HGNC Symbol;Acc:HGNC:2481]	7.80171e-24	-0.689004	0.171	0.368	1.94871e-19	mg-TAM 2	All other cells	ND1_7.Neftel_2019_10x Myeloid_cells	0.409555	0.914897	0.1	1000
MIF	macrophage migration inhibitory factor [Source:HGNC Symbol;Acc:HGNC:7097]	7.84592e-24	-1.069	0.424	0.649	1.95975e-19	mg-TAM 2	All other cells	ND1_7.Neftel_2019_10x Myeloid_cells	1.3767	4.20083	0.1	1000
GPNMB	glycoprotein nmb [Source:HGNC Symbol;Acc:HGNC:4462]	8.56559e-24	-0.852403	0.227	0.433	2.13951e-19	mg-TAM 2	All other cells	ND1_7.Neftel_2019_10x Myeloid_cells	0.942027	2.34384	0.1	1000
MAFF	MAF bZIP transcription factor F [Source:HGNC Symbol;Acc:HGNC:6780]	9.30884e-24	-1.11376	0.038	0.181	2.32516e-19	mg-TAM 2	All other cells	ND1_7.Neftel_2019_10x Myeloid_cells	0.0687201	0.413885	0.1	1000
BLVRA	biliverdin reductase A [Source:HGNC Symbol;Acc:HGNC:1062]	9.76328e-24	-0.988346	0.027	0.172	2.43867e-19	mg-TAM 2	All other cells	ND1_7.Neftel_2019_10x Myeloid_cells	0.0688761	0.353734	0.1	1000
CLEC2B	C-type lectin domain family 2 member B [Source:HGNC Symbol;Acc:HGNC:2053]	1.16813e-23	-0.750319	0.192	0.409	2.91775e-19	mg-TAM 2	All other cells	ND1_7.Neftel_2019_10x Myeloid_cells	0.544828	1.26554	0.1	1000
RP11-480C22.1		1.25571e-23	0.820849	0.387	0.201	3.1365e-19	mg-TAM 2	All other cells	ND1_7.Neftel_2019_10x Myeloid_cells	1.16266	0.455644	0.1	1000
DOK2	docking protein 2 [Source:HGNC Symbol;Acc:HGNC:2991]	1.25786e-23	-1.00023	0.016	0.132	3.14189e-19	mg-TAM 2	All other cells	ND1_7.Neftel_2019_10x Myeloid_cells	0.030678	0.255301	0.1	1000
KDM6B	lysine demethylase 6B [Source:HGNC Symbol;Acc:HGNC:29012]	1.60645e-23	-0.898345	0.101	0.283	4.01259e-19	mg-TAM 2	All other cells	ND1_7.Neftel_2019_10x Myeloid_cells	0.223131	0.693461	0.1	1000
ACY3	aminoacylase 3 [Source:HGNC Symbol;Acc:HGNC:24104]	1.67349e-23	0.93462	0.2	0.068	4.18005e-19	mg-TAM 2	All other cells	ND1_7.Neftel_2019_10x Myeloid_cells	0.594394	0.172713	0.1	1000
ARL5A	ADP ribosylation factor like GTPase 5A [Source:HGNC Symbol;Acc:HGNC:696]	7.44499e-23	0.443483	0.765	0.643	1.85961e-18	mg-TAM 2	All other cells	ND1_7.Neftel_2019_10x Myeloid_cells	3.44867	2.17752	0.1	1000
NR4A1	nuclear receptor subfamily 4 group A member 1 [Source:HGNC Symbol;Acc:HGNC:7980]	7.51813e-23	-1.0572	0.263	0.501	1.87788e-18	mg-TAM 2	All other cells	ND1_7.Neftel_2019_10x Myeloid_cells	1.21278	3.67859	0.1	1000
S100A8	S100 calcium binding protein A8 [Source:HGNC Symbol;Acc:HGNC:10498]	1.17558e-22	-1.56744	0.33	0.49	2.93637e-18	mg-TAM 2	All other cells	ND1_7.Neftel_2019_10x Myeloid_cells	1.39617	7.07314	0.1	1000
GPN3	GPN-loop GTPase 3 [Source:HGNC Symbol;Acc:HGNC:30186]	1.20582e-22	0.713801	0.458	0.301	3.0119e-18	mg-TAM 2	All other cells	ND1_7.Neftel_2019_10x Myeloid_cells	1.40477	0.637006	0.1	1000
KLF4	Kruppel like factor 4 [Source:HGNC Symbol;Acc:HGNC:6348]	1.56088e-22	-0.820751	0.207	0.417	3.89876e-18	mg-TAM 2	All other cells	ND1_7.Neftel_2019_10x Myeloid_cells	0.793993	1.93133	0.1	1000
DDX5	DEAD-box helicase 5 [Source:HGNC Symbol;Acc:HGNC:2746]	1.61855e-22	0.300912	0.931	0.851	4.04282e-18	mg-TAM 2	All other cells	ND1_7.Neftel_2019_10x Myeloid_cells	7.92871	5.84239	0.1	1000
ARGLU1	arginine and glutamate rich 1 [Source:HGNC Symbol;Acc:HGNC:25482]	2.08462e-22	0.583753	0.567	0.443	5.20696e-18	mg-TAM 2	All other cells	ND1_7.Neftel_2019_10x Myeloid_cells	1.90224	1.01685	0.1	1000
TNFAIP3	TNF alpha induced protein 3 [Source:HGNC Symbol;Acc:HGNC:11896]	2.57338e-22	-1.01326	0.181	0.399	6.42778e-18	mg-TAM 2	All other cells	ND1_7.Neftel_2019_10x Myeloid_cells	0.555187	1.70476	0.1	1000
IFITM3	interferon induced transmembrane protein 3 [Source:HGNC Symbol;Acc:HGNC:5414]	2.93105e-22	-0.723186	0.389	0.59	7.32118e-18	mg-TAM 2	All other cells	ND1_7.Neftel_2019_10x Myeloid_cells	1.67885	3.56619	0.1	1000
SRGAP2B	SLIT-ROBO Rho GTPase activating protein 2B [Source:HGNC Symbol;Acc:HGNC:35237]	3.36026e-22	0.776004	0.348	0.196	8.39327e-18	mg-TAM 2	All other cells	ND1_7.Neftel_2019_10x Myeloid_cells	0.970442	0.392661	0.1	1000
C3	complement C3 [Source:HGNC Symbol;Acc:HGNC:1318]	7.00582e-22	0.340916	0.96	0.825	1.74991e-17	mg-TAM 2	All other cells	ND1_7.Neftel_2019_10x Myeloid_cells	13.484	9.55982	0.1	1000
TREM1	triggering receptor expressed on myeloid cells 1 [Source:HGNC Symbol;Acc:HGNC:17760]	7.55686e-22	-1.08348	0.079	0.249	1.88755e-17	mg-TAM 2	All other cells	ND1_7.Neftel_2019_10x Myeloid_cells	0.180067	0.727585	0.1	1000
TBXAS1	thromboxane A synthase 1 [Source:HGNC Symbol;Acc:HGNC:11609]	9.95084e-22	0.418122	0.729	0.632	2.48552e-17	mg-TAM 2	All other cells	ND1_7.Neftel_2019_10x Myeloid_cells	3.10353	2.00883	0.1	1000
CD93	CD93 molecule [Source:HGNC Symbol;Acc:HGNC:15855]	1.64362e-21	-0.720199	0.055	0.178	4.10542e-17	mg-TAM 2	All other cells	ND1_7.Neftel_2019_10x Myeloid_cells	0.135401	0.383711	0.1	1000
HPGDS	hematopoietic prostaglandin D synthase [Source:HGNC Symbol;Acc:HGNC:17890]	1.72227e-21	0.588864	0.532	0.347	4.30189e-17	mg-TAM 2	All other cells	ND1_7.Neftel_2019_10x Myeloid_cells	1.71175	0.905442	0.1	1000
TYMP	thymidine phosphorylase [Source:HGNC Symbol;Acc:HGNC:3148]	2.96373e-21	-0.454381	0.689	0.779	7.40279e-17	mg-TAM 2	All other cells	ND1_7.Neftel_2019_10x Myeloid_cells	3.3686	5.36373	0.1	1000
GLDN	gliomedin [Source:HGNC Symbol;Acc:HGNC:29514]	2.99774e-21	0.551473	0.543	0.375	7.48775e-17	mg-TAM 2	All other cells	ND1_7.Neftel_2019_10x Myeloid_cells	2.45142	1.36987	0.1	1000
ICAM1	intercellular adhesion molecule 1 [Source:HGNC Symbol;Acc:HGNC:5344]	4.35385e-21	-0.828174	0.098	0.255	1.08751e-16	mg-TAM 2	All other cells	ND1_7.Neftel_2019_10x Myeloid_cells	0.224533	0.642899	0.1	1000
SDS	serine dehydratase [Source:HGNC Symbol;Acc:HGNC:10691]	6.17131e-21	-1.6539	0.025	0.158	1.54147e-16	mg-TAM 2	All other cells	ND1_7.Neftel_2019_10x Myeloid_cells	0.0610946	0.742094	0.1	1000
SDCBP	syndecan binding protein [Source:HGNC Symbol;Acc:HGNC:10662]	6.27056e-21	-0.499444	0.611	0.765	1.56626e-16	mg-TAM 2	All other cells	ND1_7.Neftel_2019_10x Myeloid_cells	2.29798	3.85139	0.1	1000
TIMP1	TIMP metallopeptidase inhibitor 1 [Source:HGNC Symbol;Acc:HGNC:11820]	7.77699e-21	-1.38592	0.429	0.597	1.94254e-16	mg-TAM 2	All other cells	ND1_7.Neftel_2019_10x Myeloid_cells	1.22861	5.21242	0.1	1000
BNIP3	BCL2 interacting protein 3 [Source:HGNC Symbol;Acc:HGNC:1084]	1.26129e-20	-1.38806	0.017	0.126	3.15044e-16	mg-TAM 2	All other cells	ND1_7.Neftel_2019_10x Myeloid_cells	0.0474946	0.491022	0.1	1000
METTL9	methyltransferase like 9 [Source:HGNC Symbol;Acc:HGNC:24586]	1.26215e-20	0.494075	0.528	0.433	3.15259e-16	mg-TAM 2	All other cells	ND1_7.Neftel_2019_10x Myeloid_cells	1.59285	0.932869	0.1	1000
PKM	pyruvate kinase M1/2 [Source:HGNC Symbol;Acc:HGNC:9021]	1.94515e-20	-0.482095	0.725	0.794	4.8586e-16	mg-TAM 2	All other cells	ND1_7.Neftel_2019_10x Myeloid_cells	2.97136	4.87395	0.1	1000
GLIPR2	GLI pathogenesis related 2 [Source:HGNC Symbol;Acc:HGNC:18007]	2.2913e-20	-0.872595	0.053	0.193	5.7232e-16	mg-TAM 2	All other cells	ND1_7.Neftel_2019_10x Myeloid_cells	0.111487	0.406112	0.1	1000
SOCS6	suppressor of cytokine signaling 6 [Source:HGNC Symbol;Acc:HGNC:16833]	2.32401e-20	0.693891	0.479	0.317	5.80491e-16	mg-TAM 2	All other cells	ND1_7.Neftel_2019_10x Myeloid_cells	1.65818	0.778435	0.1	1000
CLU	clusterin [Source:HGNC Symbol;Acc:HGNC:2095]	2.3349e-20	-1.03327	0.111	0.267	5.8321e-16	mg-TAM 2	All other cells	ND1_7.Neftel_2019_10x Myeloid_cells	0.433504	1.39928	0.1	1000
MYO1G	myosin IG [Source:HGNC Symbol;Acc:HGNC:13880]	3.14809e-20	-0.748938	0.031	0.136	7.8633e-16	mg-TAM 2	All other cells	ND1_7.Neftel_2019_10x Myeloid_cells	0.0621365	0.242879	0.1	1000
MIS18BP1	MIS18 binding protein 1 [Source:HGNC Symbol;Acc:HGNC:20190]	4.75947e-20	0.592596	0.475	0.347	1.18882e-15	mg-TAM 2	All other cells	ND1_7.Neftel_2019_10x Myeloid_cells	1.46168	0.763439	0.1	1000
IFI30	IFI30 lysosomal thiol reductase [Source:HGNC Symbol;Acc:HGNC:5398]	5.26244e-20	-0.72329	0.185	0.396	1.31445e-15	mg-TAM 2	All other cells	ND1_7.Neftel_2019_10x Myeloid_cells	0.522813	1.18374	0.1	1000
KCNAB2	potassium voltage-gated channel subfamily A regulatory beta subunit 2 [Source:HGNC Symbol;Acc:HGNC:6229]	6.77592e-20	-0.851822	0.024	0.134	1.69249e-15	mg-TAM 2	All other cells	ND1_7.Neftel_2019_10x Myeloid_cells	0.0475945	0.245949	0.1	1000
ACTN1	actinin alpha 1 [Source:HGNC Symbol;Acc:HGNC:163]	7.65874e-20	-0.556316	0.043	0.141	1.913e-15	mg-TAM 2	All other cells	ND1_7.Neftel_2019_10x Myeloid_cells	0.0868066	0.225835	0.1	1000
ACSL1	acyl-CoA synthetase long chain family member 1 [Source:HGNC Symbol;Acc:HGNC:3569]	7.91991e-20	-0.712654	0.205	0.414	1.97823e-15	mg-TAM 2	All other cells	ND1_7.Neftel_2019_10x Myeloid_cells	0.549617	1.22483	0.1	1000
PLA2G16		9.12175e-20	0.479898	0.568	0.442	2.27843e-15	mg-TAM 2	All other cells	ND1_7.Neftel_2019_10x Myeloid_cells	1.82029	1.08836	0.1	1000
SRGAP2C	SLIT-ROBO Rho GTPase activating protein 2C [Source:HGNC Symbol;Acc:HGNC:30584]	1.09888e-19	0.790773	0.357	0.208	2.74478e-15	mg-TAM 2	All other cells	ND1_7.Neftel_2019_10x Myeloid_cells	0.995775	0.396927	0.1	1000
EMP3	epithelial membrane protein 3 [Source:HGNC Symbol;Acc:HGNC:3335]	1.27875e-19	-0.590885	0.356	0.554	3.19406e-15	mg-TAM 2	All other cells	ND1_7.Neftel_2019_10x Myeloid_cells	1.50054	2.78991	0.1	1000
PTPRC	protein tyrosine phosphatase receptor type C [Source:HGNC Symbol;Acc:HGNC:9666]	1.33159e-19	0.396362	0.738	0.65	3.32605e-15	mg-TAM 2	All other cells	ND1_7.Neftel_2019_10x Myeloid_cells	3.18037	2.10691	0.1	1000
MT-ND2	mitochondrially encoded NADH:ubiquinone oxidoreductase core subunit 2 [Source:HGNC Symbol;Acc:HGNC:7456]	1.51458e-19	0.281558	0.977	0.941	3.78311e-15	mg-TAM 2	All other cells	ND1_7.Neftel_2019_10x Myeloid_cells	33.9933	25.627	0.1	1000
ST6GAL1	ST6 beta-galactoside alpha-2,6-sialyltransferase 1 [Source:HGNC Symbol;Acc:HGNC:10860]	1.68632e-19	0.541077	0.498	0.372	4.21209e-15	mg-TAM 2	All other cells	ND1_7.Neftel_2019_10x Myeloid_cells	1.56504	0.869256	0.1	1000
PLP2	proteolipid protein 2 [Source:HGNC Symbol;Acc:HGNC:9087]	1.73715e-19	-0.801166	0.144	0.304	4.33904e-15	mg-TAM 2	All other cells	ND1_7.Neftel_2019_10x Myeloid_cells	0.311467	0.816804	0.1	1000
NUPR1	nuclear protein 1, transcriptional regulator [Source:HGNC Symbol;Acc:HGNC:29990]	1.89545e-19	-1.17247	0.184	0.384	4.73446e-15	mg-TAM 2	All other cells	ND1_7.Neftel_2019_10x Myeloid_cells	0.738876	2.60952	0.1	1000
MARCKS	myristoylated alanine rich protein kinase C substrate [Source:HGNC Symbol;Acc:HGNC:6759]	4.02549e-19	0.362453	0.856	0.732	1.00549e-14	mg-TAM 2	All other cells	ND1_7.Neftel_2019_10x Myeloid_cells	5.35477	3.69634	0.1	1000
SEC11A	SEC11 homolog A, signal peptidase complex subunit [Source:HGNC Symbol;Acc:HGNC:17718]	4.97134e-19	0.261909	0.807	0.746	1.24174e-14	mg-TAM 2	All other cells	ND1_7.Neftel_2019_10x Myeloid_cells	3.82297	2.91904	0.1	1000
CCL2	C-C motif chemokine ligand 2 [Source:HGNC Symbol;Acc:HGNC:10618]	5.30762e-19	-1.97982	0.053	0.171	1.32574e-14	mg-TAM 2	All other cells	ND1_7.Neftel_2019_10x Myeloid_cells	0.180501	1.93122	0.1	1000
ANKRD44	ankyrin repeat domain 44 [Source:HGNC Symbol;Acc:HGNC:25259]	6.34675e-19	0.705167	0.355	0.213	1.58529e-14	mg-TAM 2	All other cells	ND1_7.Neftel_2019_10x Myeloid_cells	0.927461	0.407593	0.1	1000
HIF1A	hypoxia inducible factor 1 subunit alpha [Source:HGNC Symbol;Acc:HGNC:4910]	7.90248e-19	-0.544595	0.368	0.573	1.97388e-14	mg-TAM 2	All other cells	ND1_7.Neftel_2019_10x Myeloid_cells	1.12952	2.01958	0.1	1000
YWHAH	tyrosine 3-monooxygenase/tryptophan 5-monooxygenase activation protein eta [Source:HGNC Symbol;Acc:HGNC:12853]	8.43557e-19	0.320154	0.903	0.794	2.10704e-14	mg-TAM 2	All other cells	ND1_7.Neftel_2019_10x Myeloid_cells	8.17045	5.90465	0.1	1000
GABARAP	GABA type A receptor-associated protein [Source:HGNC Symbol;Acc:HGNC:4067]	8.91555e-19	-0.448331	0.33	0.506	2.22693e-14	mg-TAM 2	All other cells	ND1_7.Neftel_2019_10x Myeloid_cells	1.83526	2.93003	0.1	1000
IFI16	interferon gamma inducible protein 16 [Source:HGNC Symbol;Acc:HGNC:5395]	9.44492e-19	0.453014	0.703	0.577	2.35915e-14	mg-TAM 2	All other cells	ND1_7.Neftel_2019_10x Myeloid_cells	2.84243	1.77053	0.1	1000
PPP1R15A	protein phosphatase 1 regulatory subunit 15A [Source:HGNC Symbol;Acc:HGNC:14375]	1.06592e-18	-0.741824	0.42	0.629	2.66246e-14	mg-TAM 2	All other cells	ND1_7.Neftel_2019_10x Myeloid_cells	1.75001	3.78459	0.1	1000
THBS1	thrombospondin 1 [Source:HGNC Symbol;Acc:HGNC:11785]	1.09008e-18	-1.66277	0.017	0.106	2.7228e-14	mg-TAM 2	All other cells	ND1_7.Neftel_2019_10x Myeloid_cells	0.0370389	0.622732	0.1	1000
ID3	inhibitor of DNA binding 3, HLH protein [Source:HGNC Symbol;Acc:HGNC:5362]	1.40785e-18	-1.20204	0.025	0.135	3.51653e-14	mg-TAM 2	All other cells	ND1_7.Neftel_2019_10x Myeloid_cells	0.0671092	0.455954	0.1	1000
ADRB2	adrenoceptor beta 2 [Source:HGNC Symbol;Acc:HGNC:286]	1.42723e-18	0.952385	0.333	0.159	3.56493e-14	mg-TAM 2	All other cells	ND1_7.Neftel_2019_10x Myeloid_cells	0.975404	0.314912	0.1	1000
SCAMP2	secretory carrier membrane protein 2 [Source:HGNC Symbol;Acc:HGNC:10564]	2.34184e-18	0.357284	0.698	0.607	5.84945e-14	mg-TAM 2	All other cells	ND1_7.Neftel_2019_10x Myeloid_cells	2.54884	1.75306	0.1	1000
CLEC9A	C-type lectin domain containing 9A [Source:HGNC Symbol;Acc:HGNC:26705]	2.46407e-18	0.940827	0.24	0.093	6.15476e-14	mg-TAM 2	All other cells	ND1_7.Neftel_2019_10x Myeloid_cells	0.706737	0.214873	0.1	1000
NAGK	N-acetylglucosamine kinase [Source:HGNC Symbol;Acc:HGNC:17174]	2.59284e-18	0.352354	0.656	0.564	6.47639e-14	mg-TAM 2	All other cells	ND1_7.Neftel_2019_10x Myeloid_cells	2.42063	1.67208	0.1	1000
GNG7	G protein subunit gamma 7 [Source:HGNC Symbol;Acc:HGNC:4410]	3.0441e-18	0.523381	0.534	0.404	7.60356e-14	mg-TAM 2	All other cells	ND1_7.Neftel_2019_10x Myeloid_cells	1.71683	0.976496	0.1	1000
MT1F	metallothionein 1F [Source:HGNC Symbol;Acc:HGNC:7398]	3.16339e-18	-1.01823	0.035	0.149	7.90152e-14	mg-TAM 2	All other cells	ND1_7.Neftel_2019_10x Myeloid_cells	0.0724221	0.377315	0.1	1000
CXCL2	C-X-C motif chemokine ligand 2 [Source:HGNC Symbol;Acc:HGNC:4603]	3.48519e-18	-2.31023	0.021	0.127	8.70532e-14	mg-TAM 2	All other cells	ND1_7.Neftel_2019_10x Myeloid_cells	0.0415553	1.32641	0.1	1000
NEAT1	nuclear paraspeckle assembly transcript 1 [Source:HGNC Symbol;Acc:HGNC:30815]	3.68262e-18	-0.418295	0.927	0.907	9.19844e-14	mg-TAM 2	All other cells	ND1_7.Neftel_2019_10x Myeloid_cells	9.06874	13.8307	0.1	1000
LST1	leukocyte specific transcript 1 [Source:HGNC Symbol;Acc:HGNC:14189]	3.73833e-18	0.291596	0.907	0.823	9.3376e-14	mg-TAM 2	All other cells	ND1_7.Neftel_2019_10x Myeloid_cells	7.12051	5.29423	0.1	1000
ABL2	ABL proto-oncogene 2, non-receptor tyrosine kinase [Source:HGNC Symbol;Acc:HGNC:77]	3.78687e-18	-0.749538	0.106	0.255	9.45884e-14	mg-TAM 2	All other cells	ND1_7.Neftel_2019_10x Myeloid_cells	0.253444	0.647894	0.1	1000
PLTP	phospholipid transfer protein [Source:HGNC Symbol;Acc:HGNC:9093]	4.55351e-18	-0.924607	0.334	0.542	1.13738e-13	mg-TAM 2	All other cells	ND1_7.Neftel_2019_10x Myeloid_cells	2.39473	6.1889	0.1	1000
LPAR6	lysophosphatidic acid receptor 6 [Source:HGNC Symbol;Acc:HGNC:15520]	4.65965e-18	0.479921	0.666	0.535	1.16389e-13	mg-TAM 2	All other cells	ND1_7.Neftel_2019_10x Myeloid_cells	2.63099	1.59003	0.1	1000
HMOX1	heme oxygenase 1 [Source:HGNC Symbol;Acc:HGNC:5013]	4.79473e-18	-0.888428	0.756	0.799	1.19763e-13	mg-TAM 2	All other cells	ND1_7.Neftel_2019_10x Myeloid_cells	4.31623	10.6372	0.1	1000
PDE4B	phosphodiesterase 4B [Source:HGNC Symbol;Acc:HGNC:8781]	5.06471e-18	-0.613238	0.128	0.289	1.26506e-13	mg-TAM 2	All other cells	ND1_7.Neftel_2019_10x Myeloid_cells	0.32278	0.680621	0.1	1000
SARAF	store-operated calcium entry associated regulatory factor [Source:HGNC Symbol;Acc:HGNC:28789]	5.37053e-18	0.348578	0.776	0.63	1.34145e-13	mg-TAM 2	All other cells	ND1_7.Neftel_2019_10x Myeloid_cells	4.33385	3.02893	0.1	1000
RGS2	regulator of G protein signaling 2 [Source:HGNC Symbol;Acc:HGNC:9998]	5.69504e-18	-0.796128	0.43	0.603	1.42251e-13	mg-TAM 2	All other cells	ND1_7.Neftel_2019_10x Myeloid_cells	2.25348	5.11752	0.1	1000
LAT2	linker for activation of T cells family member 2 [Source:HGNC Symbol;Acc:HGNC:12749]	7.18556e-18	0.440429	0.674	0.566	1.79481e-13	mg-TAM 2	All other cells	ND1_7.Neftel_2019_10x Myeloid_cells	2.56544	1.6159	0.1	1000
CLEC5A	C-type lectin domain containing 5A [Source:HGNC Symbol;Acc:HGNC:2054]	7.52666e-18	-0.750401	0.103	0.25	1.88001e-13	mg-TAM 2	All other cells	ND1_7.Neftel_2019_10x Myeloid_cells	0.266395	0.675969	0.1	1000
PGK1	phosphoglycerate kinase 1 [Source:HGNC Symbol;Acc:HGNC:8896]	1.24043e-17	-0.595718	0.642	0.734	3.09834e-13	mg-TAM 2	All other cells	ND1_7.Neftel_2019_10x Myeloid_cells	2.19573	4.06522	0.1	1000
CHD9	chromodomain helicase DNA binding protein 9 [Source:HGNC Symbol;Acc:HGNC:25701]	1.28198e-17	0.444067	0.551	0.472	3.20212e-13	mg-TAM 2	All other cells	ND1_7.Neftel_2019_10x Myeloid_cells	1.79016	1.11239	0.1	1000
LYL1	LYL1 basic helix-loop-helix family member [Source:HGNC Symbol;Acc:HGNC:6734]	1.55248e-17	0.679578	0.396	0.264	3.87779e-13	mg-TAM 2	All other cells	ND1_7.Neftel_2019_10x Myeloid_cells	1.10445	0.510452	0.1	1000
DSE	dermatan sulfate epimerase [Source:HGNC Symbol;Acc:HGNC:21144]	1.65007e-17	-0.524589	0.146	0.334	4.12154e-13	mg-TAM 2	All other cells	ND1_7.Neftel_2019_10x Myeloid_cells	0.387609	0.723944	0.1	1000
ZFAND5	zinc finger AN1-type containing 5 [Source:HGNC Symbol;Acc:HGNC:13008]	1.91643e-17	-0.706603	0.298	0.499	4.78686e-13	mg-TAM 2	All other cells	ND1_7.Neftel_2019_10x Myeloid_cells	0.812473	1.74967	0.1	1000
AZI2	5-azacytidine induced 2 [Source:HGNC Symbol;Acc:HGNC:24002]	1.9325e-17	-0.72692	0.1	0.249	4.82699e-13	mg-TAM 2	All other cells	ND1_7.Neftel_2019_10x Myeloid_cells	0.243445	0.610485	0.1	1000
GRID2	glutamate ionotropic receptor delta type subunit 2 [Source:HGNC Symbol;Acc:HGNC:4576]	3.28257e-17	0.859369	0.113	0.033	8.19921e-13	mg-TAM 2	All other cells	ND1_7.Neftel_2019_10x Myeloid_cells	0.30497	0.0714762	0.1	1000
AVPI1	arginine vasopressin induced 1 [Source:HGNC Symbol;Acc:HGNC:30898]	3.33944e-17	-0.721214	0.035	0.131	8.34125e-13	mg-TAM 2	All other cells	ND1_7.Neftel_2019_10x Myeloid_cells	0.0826725	0.275744	0.1	1000
GLTSCR2		3.57352e-17	0.349034	0.759	0.69	8.92594e-13	mg-TAM 2	All other cells	ND1_7.Neftel_2019_10x Myeloid_cells	3.47902	2.42453	0.1	1000
TMEM156	transmembrane protein 156 [Source:HGNC Symbol;Acc:HGNC:26260]	4.35193e-17	0.749823	0.306	0.175	1.08703e-12	mg-TAM 2	All other cells	ND1_7.Neftel_2019_10x Myeloid_cells	0.762309	0.307398	0.1	1000
ALDOA	aldolase, fructose-bisphosphate A [Source:HGNC Symbol;Acc:HGNC:414]	4.92222e-17	-0.505169	0.862	0.876	1.22947e-12	mg-TAM 2	All other cells	ND1_7.Neftel_2019_10x Myeloid_cells	4.89516	8.17831	0.1	1000
KLF10	Kruppel like factor 10 [Source:HGNC Symbol;Acc:HGNC:11810]	5.35151e-17	-0.740712	0.07	0.2	1.3367e-12	mg-TAM 2	All other cells	ND1_7.Neftel_2019_10x Myeloid_cells	0.153549	0.431801	0.1	1000
MT1X	metallothionein 1X [Source:HGNC Symbol;Acc:HGNC:7405]	5.50156e-17	-1.79854	0.204	0.389	1.37418e-12	mg-TAM 2	All other cells	ND1_7.Neftel_2019_10x Myeloid_cells	0.595265	4.09995	0.1	1000
PLEC	plectin [Source:HGNC Symbol;Acc:HGNC:9069]	6.16286e-17	-0.449836	0.122	0.244	1.53936e-12	mg-TAM 2	All other cells	ND1_7.Neftel_2019_10x Myeloid_cells	0.281441	0.498121	0.1	1000
IL18	interleukin 18 [Source:HGNC Symbol;Acc:HGNC:5986]	6.61168e-17	0.356956	0.698	0.612	1.65146e-12	mg-TAM 2	All other cells	ND1_7.Neftel_2019_10x Myeloid_cells	2.86133	1.97235	0.1	1000
CKS2	CDC28 protein kinase regulatory subunit 2 [Source:HGNC Symbol;Acc:HGNC:2000]	7.62291e-17	-0.796514	0.141	0.303	1.90405e-12	mg-TAM 2	All other cells	ND1_7.Neftel_2019_10x Myeloid_cells	0.377516	0.959034	0.1	1000
HLA-DRB5	major histocompatibility complex, class II, DR beta 5 [Source:HGNC Symbol;Acc:HGNC:4953]	9.10999e-17	-0.443251	0.41	0.611	2.27549e-12	mg-TAM 2	All other cells	ND1_7.Neftel_2019_10x Myeloid_cells	7.27492	11.3884	0.1	1000
P2RY12	purinergic receptor P2Y12 [Source:HGNC Symbol;Acc:HGNC:18124]	9.12109e-17	0.861767	0.369	0.192	2.27827e-12	mg-TAM 2	All other cells	ND1_7.Neftel_2019_10x Myeloid_cells	1.16496	0.434339	0.1	1000
TUBB4B	tubulin beta 4B class IVb [Source:HGNC Symbol;Acc:HGNC:20771]	9.1731e-17	-0.592713	0.177	0.331	2.29126e-12	mg-TAM 2	All other cells	ND1_7.Neftel_2019_10x Myeloid_cells	0.425872	0.851244	0.1	1000
TSPAN4	tetraspanin 4 [Source:HGNC Symbol;Acc:HGNC:11859]	1.10375e-16	-0.807803	0.025	0.126	2.75696e-12	mg-TAM 2	All other cells	ND1_7.Neftel_2019_10x Myeloid_cells	0.0546528	0.246882	0.1	1000
NAV3	neuron navigator 3 [Source:HGNC Symbol;Acc:HGNC:15998]	1.29948e-16	0.774292	0.212	0.101	3.24585e-12	mg-TAM 2	All other cells	ND1_7.Neftel_2019_10x Myeloid_cells	0.519658	0.185681	0.1	1000
IER3	immediate early response 3 [Source:HGNC Symbol;Acc:HGNC:5392]	1.56264e-16	-0.684511	0.524	0.653	3.90316e-12	mg-TAM 2	All other cells	ND1_7.Neftel_2019_10x Myeloid_cells	2.83939	5.72822	0.1	1000
PPDPF	pancreatic progenitor cell differentiation and proliferation factor [Source:HGNC Symbol;Acc:HGNC:16142]	1.62894e-16	-0.65176	0.387	0.599	4.06878e-12	mg-TAM 2	All other cells	ND1_7.Neftel_2019_10x Myeloid_cells	1.05177	2.11014	0.1	1000
MTRNR2L12	MT-RNR2 like 12 [Source:HGNC Symbol;Acc:HGNC:37169]	1.84746e-16	-0.717998	0.227	0.376	4.61458e-12	mg-TAM 2	All other cells	ND1_7.Neftel_2019_10x Myeloid_cells	3.39644	7.06883	0.1	1000
FLNA	filamin A [Source:HGNC Symbol;Acc:HGNC:3754]	1.90066e-16	-0.917291	0.035	0.138	4.74747e-12	mg-TAM 2	All other cells	ND1_7.Neftel_2019_10x Myeloid_cells	0.0728676	0.332601	0.1	1000
SLC2A3	solute carrier family 2 member 3 [Source:HGNC Symbol;Acc:HGNC:11007]	1.92191e-16	-0.735384	0.239	0.404	4.80054e-12	mg-TAM 2	All other cells	ND1_7.Neftel_2019_10x Myeloid_cells	0.7951	1.76743	0.1	1000
ASGR1	asialoglycoprotein receptor 1 [Source:HGNC Symbol;Acc:HGNC:742]	2.12092e-16	-0.927981	0.007	0.102	5.29765e-12	mg-TAM 2	All other cells	ND1_7.Neftel_2019_10x Myeloid_cells	0.0159849	0.193372	0.1	1000
PKIB	cAMP-dependent protein kinase inhibitor beta [Source:HGNC Symbol;Acc:HGNC:9018]	2.4312e-16	-0.972511	0.043	0.149	6.07266e-12	mg-TAM 2	All other cells	ND1_7.Neftel_2019_10x Myeloid_cells	0.108471	0.451318	0.1	1000
STX11	syntaxin 11 [Source:HGNC Symbol;Acc:HGNC:11429]	2.50024e-16	-0.789085	0.083	0.238	6.24511e-12	mg-TAM 2	All other cells	ND1_7.Neftel_2019_10x Myeloid_cells	0.178921	0.514011	0.1	1000
EIF3F	eukaryotic translation initiation factor 3 subunit F [Source:HGNC Symbol;Acc:HGNC:3275]	2.73853e-16	0.311988	0.768	0.705	6.8403e-12	mg-TAM 2	All other cells	ND1_7.Neftel_2019_10x Myeloid_cells	3.36446	2.43596	0.1	1000
ATF5	activating transcription factor 5 [Source:HGNC Symbol;Acc:HGNC:790]	3.70145e-16	-0.681536	0.126	0.272	9.24549e-12	mg-TAM 2	All other cells	ND1_7.Neftel_2019_10x Myeloid_cells	0.298946	0.688682	0.1	1000
GAPDH	glyceraldehyde-3-phosphate dehydrogenase [Source:HGNC Symbol;Acc:HGNC:4141]	3.7858e-16	-0.516314	0.989	0.98	9.45616e-12	mg-TAM 2	All other cells	ND1_7.Neftel_2019_10x Myeloid_cells	22.7718	38.2294	0.1	1000
CD83	CD83 molecule [Source:HGNC Symbol;Acc:HGNC:1703]	4.36877e-16	-0.777292	0.396	0.594	1.09123e-11	mg-TAM 2	All other cells	ND1_7.Neftel_2019_10x Myeloid_cells	1.84974	4.1418	0.1	1000
RP11-160E2.6		5.0347e-16	0.50263	0.481	0.338	1.25757e-11	mg-TAM 2	All other cells	ND1_7.Neftel_2019_10x Myeloid_cells	2.19935	1.29096	0.1	1000
MTDH	metadherin [Source:HGNC Symbol;Acc:HGNC:29608]	5.14012e-16	0.342645	0.798	0.711	1.2839e-11	mg-TAM 2	All other cells	ND1_7.Neftel_2019_10x Myeloid_cells	3.76033	2.64041	0.1	1000
GIMAP4	GTPase, IMAP family member 4 [Source:HGNC Symbol;Acc:HGNC:21872]	5.4851e-16	0.458237	0.589	0.463	1.37007e-11	mg-TAM 2	All other cells	ND1_7.Neftel_2019_10x Myeloid_cells	1.93569	1.18736	0.1	1000
FGR	FGR proto-oncogene, Src family tyrosine kinase [Source:HGNC Symbol;Acc:HGNC:3697]	7.41211e-16	-0.627252	0.092	0.238	1.8514e-11	mg-TAM 2	All other cells	ND1_7.Neftel_2019_10x Myeloid_cells	0.206543	0.47399	0.1	1000
ABI3	ABI family member 3 [Source:HGNC Symbol;Acc:HGNC:29859]	1.06116e-15	0.403311	0.74	0.605	2.65056e-11	mg-TAM 2	All other cells	ND1_7.Neftel_2019_10x Myeloid_cells	3.03536	1.99475	0.1	1000
GFAP	glial fibrillary acidic protein [Source:HGNC Symbol;Acc:HGNC:4235]	1.06593e-15	-0.573559	0.123	0.25	2.66249e-11	mg-TAM 2	All other cells	ND1_7.Neftel_2019_10x Myeloid_cells	0.433353	0.846473	0.1	1000
TPI1	triosephosphate isomerase 1 [Source:HGNC Symbol;Acc:HGNC:12009]	1.16955e-15	-0.507002	0.822	0.858	2.92131e-11	mg-TAM 2	All other cells	ND1_7.Neftel_2019_10x Myeloid_cells	4.01951	6.73965	0.1	1000
PVRL2		1.26809e-15	-0.545042	0.088	0.237	3.16744e-11	mg-TAM 2	All other cells	ND1_7.Neftel_2019_10x Myeloid_cells	0.195326	0.409343	0.1	1000
ELL2	elongation factor for RNA polymerase II 2 [Source:HGNC Symbol;Acc:HGNC:17064]	1.37705e-15	-0.601816	0.248	0.432	3.43961e-11	mg-TAM 2	All other cells	ND1_7.Neftel_2019_10x Myeloid_cells	0.632961	1.23797	0.1	1000
GNA13	G protein subunit alpha 13 [Source:HGNC Symbol;Acc:HGNC:4381]	1.61377e-15	-0.620312	0.17	0.35	4.03088e-11	mg-TAM 2	All other cells	ND1_7.Neftel_2019_10x Myeloid_cells	0.393193	0.817096	0.1	1000
FSCN1	fascin actin-bundling protein 1 [Source:HGNC Symbol;Acc:HGNC:11148]	1.65935e-15	0.494845	0.619	0.463	4.14472e-11	mg-TAM 2	All other cells	ND1_7.Neftel_2019_10x Myeloid_cells	2.44723	1.45296	0.1	1000
ACP5	acid phosphatase 5, tartrate resistant [Source:HGNC Symbol;Acc:HGNC:124]	1.90453e-15	-0.909961	0.047	0.143	4.75714e-11	mg-TAM 2	All other cells	ND1_7.Neftel_2019_10x Myeloid_cells	0.0955758	0.385854	0.1	1000
DUSP4	dual specificity phosphatase 4 [Source:HGNC Symbol;Acc:HGNC:3070]	2.43094e-15	-1.00807	0.019	0.104	6.07201e-11	mg-TAM 2	All other cells	ND1_7.Neftel_2019_10x Myeloid_cells	0.0430559	0.292016	0.1	1000
ZNF331	zinc finger protein 331 [Source:HGNC Symbol;Acc:HGNC:15489]	2.81418e-15	-0.879324	0.248	0.455	7.02926e-11	mg-TAM 2	All other cells	ND1_7.Neftel_2019_10x Myeloid_cells	0.902083	2.31429	0.1	1000
DNAJB1	DnaJ heat shock protein family (Hsp40) member B1 [Source:HGNC Symbol;Acc:HGNC:5270]	2.99032e-15	-1.30844	0.244	0.436	7.46922e-11	mg-TAM 2	All other cells	ND1_7.Neftel_2019_10x Myeloid_cells	1.44046	5.60028	0.1	1000
TNFRSF21	TNF receptor superfamily member 21 [Source:HGNC Symbol;Acc:HGNC:13469]	3.05689e-15	-0.566744	0.025	0.103	7.63549e-11	mg-TAM 2	All other cells	ND1_7.Neftel_2019_10x Myeloid_cells	0.0530974	0.169837	0.1	1000
PYCARD	PYD and CARD domain containing [Source:HGNC Symbol;Acc:HGNC:16608]	3.1239e-15	0.318833	0.846	0.769	7.80288e-11	mg-TAM 2	All other cells	ND1_7.Neftel_2019_10x Myeloid_cells	4.91206	3.54375	0.1	1000
RASGEF1B	RasGEF domain family member 1B [Source:HGNC Symbol;Acc:HGNC:24881]	3.29092e-15	-0.691407	0.102	0.239	8.22005e-11	mg-TAM 2	All other cells	ND1_7.Neftel_2019_10x Myeloid_cells	0.237635	0.574096	0.1	1000
FAM49B		3.51698e-15	0.318109	0.842	0.754	8.78471e-11	mg-TAM 2	All other cells	ND1_7.Neftel_2019_10x Myeloid_cells	4.38875	3.16567	0.1	1000
TGIF1	TGFB induced factor homeobox 1 [Source:HGNC Symbol;Acc:HGNC:11776]	3.9978e-15	-0.687379	0.161	0.331	9.98569e-11	mg-TAM 2	All other cells	ND1_7.Neftel_2019_10x Myeloid_cells	0.403123	0.900459	0.1	1000
HSPA6	heat shock protein family A (Hsp70) member 6 [Source:HGNC Symbol;Acc:HGNC:5239]	4.02983e-15	-1.66714	0.078	0.193	1.00657e-10	mg-TAM 2	All other cells	ND1_7.Neftel_2019_10x Myeloid_cells	0.468308	2.91031	0.1	1000
SERTAD1	SERTA domain containing 1 [Source:HGNC Symbol;Acc:HGNC:17932]	4.26956e-15	-0.636473	0.103	0.238	1.06645e-10	mg-TAM 2	All other cells	ND1_7.Neftel_2019_10x Myeloid_cells	0.243912	0.549925	0.1	1000
SCPEP1	serine carboxypeptidase 1 [Source:HGNC Symbol;Acc:HGNC:29507]	5.13135e-15	0.366368	0.649	0.561	1.28171e-10	mg-TAM 2	All other cells	ND1_7.Neftel_2019_10x Myeloid_cells	2.37337	1.61466	0.1	1000
NRP1	neuropilin 1 [Source:HGNC Symbol;Acc:HGNC:8004]	5.45556e-15	-0.439396	0.078	0.184	1.36269e-10	mg-TAM 2	All other cells	ND1_7.Neftel_2019_10x Myeloid_cells	0.177165	0.330097	0.1	1000
ENTPD1	ectonucleoside triphosphate diphosphohydrolase 1 [Source:HGNC Symbol;Acc:HGNC:3363]	5.89915e-15	0.475515	0.532	0.419	1.47349e-10	mg-TAM 2	All other cells	ND1_7.Neftel_2019_10x Myeloid_cells	1.66283	0.995713	0.1	1000
TCN2	transcobalamin 2 [Source:HGNC Symbol;Acc:HGNC:11653]	6.90571e-15	-0.58969	0.037	0.119	1.72491e-10	mg-TAM 2	All other cells	ND1_7.Neftel_2019_10x Myeloid_cells	0.0806977	0.225875	0.1	1000
OSM	oncostatin M [Source:HGNC Symbol;Acc:HGNC:8506]	6.96167e-15	-0.829217	0.136	0.308	1.73889e-10	mg-TAM 2	All other cells	ND1_7.Neftel_2019_10x Myeloid_cells	0.659	1.63927	0.1	1000
NR4A2	nuclear receptor subfamily 4 group A member 2 [Source:HGNC Symbol;Acc:HGNC:7981]	7.34289e-15	-0.763065	0.312	0.533	1.83411e-10	mg-TAM 2	All other cells	ND1_7.Neftel_2019_10x Myeloid_cells	1.35081	3.01176	0.1	1000
ARHGAP22	Rho GTPase activating protein 22 [Source:HGNC Symbol;Acc:HGNC:30320]	8.30271e-15	0.630798	0.348	0.226	2.07385e-10	mg-TAM 2	All other cells	ND1_7.Neftel_2019_10x Myeloid_cells	0.884213	0.423766	0.1	1000
GRINA	glutamate ionotropic receptor NMDA type subunit associated protein 1 [Source:HGNC Symbol;Acc:HGNC:4589]	8.52303e-15	-0.335148	0.395	0.555	2.12888e-10	mg-TAM 2	All other cells	ND1_7.Neftel_2019_10x Myeloid_cells	1.18287	1.69364	0.1	1000
TTYH3	tweety family member 3 [Source:HGNC Symbol;Acc:HGNC:22222]	9.19948e-15	-0.677905	0.074	0.208	2.29785e-10	mg-TAM 2	All other cells	ND1_7.Neftel_2019_10x Myeloid_cells	0.157621	0.407449	0.1	1000
DUSP2	dual specificity phosphatase 2 [Source:HGNC Symbol;Acc:HGNC:3068]	9.34965e-15	-1.06727	0.103	0.26	2.33536e-10	mg-TAM 2	All other cells	ND1_7.Neftel_2019_10x Myeloid_cells	0.361515	1.24183	0.1	1000
SLC7A5	solute carrier family 7 member 5 [Source:HGNC Symbol;Acc:HGNC:11063]	1.24978e-14	-0.635723	0.096	0.237	3.1217e-10	mg-TAM 2	All other cells	ND1_7.Neftel_2019_10x Myeloid_cells	0.233894	0.530521	0.1	1000
FRMD4A	FERM domain containing 4A [Source:HGNC Symbol;Acc:HGNC:25491]	1.35397e-14	0.432255	0.447	0.351	3.38196e-10	mg-TAM 2	All other cells	ND1_7.Neftel_2019_10x Myeloid_cells	1.30946	0.814799	0.1	1000
FN1	fibronectin 1 [Source:HGNC Symbol;Acc:HGNC:3778]	1.45699e-14	-1.26167	0.032	0.102	3.63927e-10	mg-TAM 2	All other cells	ND1_7.Neftel_2019_10x Myeloid_cells	0.123628	0.689704	0.1	1000
SEC61G	SEC61 translocon subunit gamma [Source:HGNC Symbol;Acc:HGNC:18277]	1.9251e-14	-0.656331	0.502	0.667	4.80851e-10	mg-TAM 2	All other cells	ND1_7.Neftel_2019_10x Myeloid_cells	1.47067	2.92778	0.1	1000
AP000439.1		2.20973e-14	0.799577	0.279	0.147	5.51947e-10	mg-TAM 2	All other cells	ND1_7.Neftel_2019_10x Myeloid_cells	0.770896	0.291484	0.1	1000
SRSF5	serine and arginine rich splicing factor 5 [Source:HGNC Symbol;Acc:HGNC:10787]	2.92087e-14	0.267383	0.765	0.696	7.29575e-10	mg-TAM 2	All other cells	ND1_7.Neftel_2019_10x Myeloid_cells	3.43823	2.60809	0.1	1000
MGST2	microsomal glutathione S-transferase 2 [Source:HGNC Symbol;Acc:HGNC:7063]	3.662e-14	0.277358	0.62	0.555	9.14693e-10	mg-TAM 2	All other cells	ND1_7.Neftel_2019_10x Myeloid_cells	2.10129	1.5681	0.1	1000
LILRB3	leukocyte immunoglobulin like receptor B3 [Source:HGNC Symbol;Acc:HGNC:6607]	3.69919e-14	-0.52952	0.047	0.139	9.23983e-10	mg-TAM 2	All other cells	ND1_7.Neftel_2019_10x Myeloid_cells	0.0980807	0.236364	0.1	1000
COX16	cytochrome c oxidase assembly factor COX16 [Source:HGNC Symbol;Acc:HGNC:20213]	3.77065e-14	-0.453369	0.115	0.235	9.41832e-10	mg-TAM 2	All other cells	ND1_7.Neftel_2019_10x Myeloid_cells	0.252121	0.454099	0.1	1000
VAMP5	vesicle associated membrane protein 5 [Source:HGNC Symbol;Acc:HGNC:12646]	3.78267e-14	-0.543394	0.165	0.297	9.44834e-10	mg-TAM 2	All other cells	ND1_7.Neftel_2019_10x Myeloid_cells	0.470646	0.882562	0.1	1000
MT1E	metallothionein 1E [Source:HGNC Symbol;Acc:HGNC:7397]	4.77617e-14	-1.54371	0.076	0.178	1.19299e-09	mg-TAM 2	All other cells	ND1_7.Neftel_2019_10x Myeloid_cells	0.184374	1.23142	0.1	1000
PILRA	paired immunoglobin like type 2 receptor alpha [Source:HGNC Symbol;Acc:HGNC:20396]	4.83925e-14	0.30941	0.514	0.447	1.20875e-09	mg-TAM 2	All other cells	ND1_7.Neftel_2019_10x Myeloid_cells	1.58309	1.13518	0.1	1000
PTGS2	prostaglandin-endoperoxide synthase 2 [Source:HGNC Symbol;Acc:HGNC:9605]	4.91251e-14	-0.862153	0.059	0.175	1.22705e-09	mg-TAM 2	All other cells	ND1_7.Neftel_2019_10x Myeloid_cells	0.190022	0.586845	0.1	1000
IL6ST	interleukin 6 signal transducer [Source:HGNC Symbol;Acc:HGNC:6021]	5.80508e-14	0.653989	0.402	0.267	1.44999e-09	mg-TAM 2	All other cells	ND1_7.Neftel_2019_10x Myeloid_cells	1.12079	0.53477	0.1	1000
CSRNP1	cysteine and serine rich nuclear protein 1 [Source:HGNC Symbol;Acc:HGNC:14300]	6.30594e-14	-0.68447	0.126	0.296	1.5751e-09	mg-TAM 2	All other cells	ND1_7.Neftel_2019_10x Myeloid_cells	0.302942	0.698921	0.1	1000
INSIG1	insulin induced gene 1 [Source:HGNC Symbol;Acc:HGNC:6083]	7.27502e-14	-0.84838	0.054	0.157	1.81715e-09	mg-TAM 2	All other cells	ND1_7.Neftel_2019_10x Myeloid_cells	0.117728	0.408581	0.1	1000
CD48	CD48 molecule [Source:HGNC Symbol;Acc:HGNC:1683]	7.38128e-14	-0.540933	0.086	0.197	1.8437e-09	mg-TAM 2	All other cells	ND1_7.Neftel_2019_10x Myeloid_cells	0.191184	0.40014	0.1	1000
LY6E	lymphocyte antigen 6 family member E [Source:HGNC Symbol;Acc:HGNC:6727]	8.42408e-14	-0.607369	0.266	0.415	2.10417e-09	mg-TAM 2	All other cells	ND1_7.Neftel_2019_10x Myeloid_cells	1.10182	2.10605	0.1	1000
SH3BGRL3	SH3 domain binding glutamate rich protein like 3 [Source:HGNC Symbol;Acc:HGNC:15568]	1.04377e-13	-0.334694	0.911	0.912	2.60713e-09	mg-TAM 2	All other cells	ND1_7.Neftel_2019_10x Myeloid_cells	7.59139	10.6488	0.1	1000
LSP1	lymphocyte specific protein 1 [Source:HGNC Symbol;Acc:HGNC:6707]	1.05493e-13	-0.5532	0.33	0.459	2.63502e-09	mg-TAM 2	All other cells	ND1_7.Neftel_2019_10x Myeloid_cells	0.970298	1.76104	0.1	1000
P4HB	prolyl 4-hydroxylase subunit beta [Source:HGNC Symbol;Acc:HGNC:8548]	1.0959e-13	-0.508797	0.444	0.584	2.73734e-09	mg-TAM 2	All other cells	ND1_7.Neftel_2019_10x Myeloid_cells	1.21336	2.0845	0.1	1000
FPR3	formyl peptide receptor 3 [Source:HGNC Symbol;Acc:HGNC:3828]	1.10105e-13	-0.556025	0.068	0.181	2.75021e-09	mg-TAM 2	All other cells	ND1_7.Neftel_2019_10x Myeloid_cells	0.153259	0.341615	0.1	1000
CD84	CD84 molecule [Source:HGNC Symbol;Acc:HGNC:1704]	1.1457e-13	0.471324	0.557	0.463	2.86174e-09	mg-TAM 2	All other cells	ND1_7.Neftel_2019_10x Myeloid_cells	1.89491	1.14517	0.1	1000
LINC00152		1.27685e-13	-0.657048	0.087	0.218	3.18932e-09	mg-TAM 2	All other cells	ND1_7.Neftel_2019_10x Myeloid_cells	0.17414	0.428841	0.1	1000
TUBA1C	tubulin alpha 1c [Source:HGNC Symbol;Acc:HGNC:20768]	1.30816e-13	-0.644849	0.156	0.307	3.26753e-09	mg-TAM 2	All other cells	ND1_7.Neftel_2019_10x Myeloid_cells	0.332822	0.724829	0.1	1000
PLSCR1	phospholipid scramblase 1 [Source:HGNC Symbol;Acc:HGNC:9092]	1.31415e-13	-0.443872	0.372	0.551	3.28249e-09	mg-TAM 2	All other cells	ND1_7.Neftel_2019_10x Myeloid_cells	1.01206	1.6334	0.1	1000
FNDC3B	fibronectin type III domain containing 3B [Source:HGNC Symbol;Acc:HGNC:24670]	1.34581e-13	-0.68386	0.07	0.204	3.36157e-09	mg-TAM 2	All other cells	ND1_7.Neftel_2019_10x Myeloid_cells	0.142915	0.381339	0.1	1000
VMO1	vitelline membrane outer layer 1 homolog [Source:HGNC Symbol;Acc:HGNC:30387]	1.62386e-13	-0.692865	0.19	0.33	4.05607e-09	mg-TAM 2	All other cells	ND1_7.Neftel_2019_10x Myeloid_cells	0.483377	1.06642	0.1	1000
RPS4Y1	ribosomal protein S4 Y-linked 1 [Source:HGNC Symbol;Acc:HGNC:10425]	1.70912e-13	-0.559332	0.131	0.259	4.26904e-09	mg-TAM 2	All other cells	ND1_7.Neftel_2019_10x Myeloid_cells	0.659693	1.22909	0.1	1000
ANKRD37	ankyrin repeat domain 37 [Source:HGNC Symbol;Acc:HGNC:29593]	1.96026e-13	-0.811945	0.052	0.159	4.89633e-09	mg-TAM 2	All other cells	ND1_7.Neftel_2019_10x Myeloid_cells	0.121636	0.399187	0.1	1000
ADGRG1	adhesion G protein-coupled receptor G1 [Source:HGNC Symbol;Acc:HGNC:4512]	2.09207e-13	0.670763	0.314	0.193	5.22557e-09	mg-TAM 2	All other cells	ND1_7.Neftel_2019_10x Myeloid_cells	0.893551	0.408021	0.1	1000
APOC2	apolipoprotein C2 [Source:HGNC Symbol;Acc:HGNC:609]	2.31863e-13	0.33054	0.636	0.48	5.79147e-09	mg-TAM 2	All other cells	ND1_7.Neftel_2019_10x Myeloid_cells	2.85263	2.02157	0.1	1000
NUDT3	nudix hydrolase 3 [Source:HGNC Symbol;Acc:HGNC:8050]	2.41938e-13	0.397123	0.553	0.479	6.04312e-09	mg-TAM 2	All other cells	ND1_7.Neftel_2019_10x Myeloid_cells	1.72822	1.12903	0.1	1000
PRPF38B	pre-mRNA processing factor 38B [Source:HGNC Symbol;Acc:HGNC:25512]	2.4582e-13	0.551786	0.551	0.443	6.1401e-09	mg-TAM 2	All other cells	ND1_7.Neftel_2019_10x Myeloid_cells	1.78626	0.986333	0.1	1000
PTTG1	PTTG1 regulator of sister chromatid separation, securin [Source:HGNC Symbol;Acc:HGNC:9690]	2.62594e-13	-0.646861	0.054	0.124	6.55906e-09	mg-TAM 2	All other cells	ND1_7.Neftel_2019_10x Myeloid_cells	0.110646	0.302237	0.1	1000
AHNAK	AHNAK nucleoprotein [Source:HGNC Symbol;Acc:HGNC:347]	2.63903e-13	-0.702349	0.038	0.127	6.59178e-09	mg-TAM 2	All other cells	ND1_7.Neftel_2019_10x Myeloid_cells	0.0898988	0.283309	0.1	1000
CTSL	cathepsin L [Source:HGNC Symbol;Acc:HGNC:2537]	2.73467e-13	-0.652488	0.638	0.728	6.83066e-09	mg-TAM 2	All other cells	ND1_7.Neftel_2019_10x Myeloid_cells	2.56299	5.01376	0.1	1000
MAP3K8	mitogen-activated protein kinase kinase kinase 8 [Source:HGNC Symbol;Acc:HGNC:6860]	2.74553e-13	-0.494467	0.311	0.494	6.85777e-09	mg-TAM 2	All other cells	ND1_7.Neftel_2019_10x Myeloid_cells	0.905561	1.54874	0.1	1000
PARVB	parvin beta [Source:HGNC Symbol;Acc:HGNC:14653]	2.99447e-13	-0.576627	0.089	0.234	7.4796e-09	mg-TAM 2	All other cells	ND1_7.Neftel_2019_10x Myeloid_cells	0.181387	0.400876	0.1	1000
CADM1	cell adhesion molecule 1 [Source:HGNC Symbol;Acc:HGNC:5951]	3.2203e-13	-0.430765	0.121	0.23	8.04366e-09	mg-TAM 2	All other cells	ND1_7.Neftel_2019_10x Myeloid_cells	0.279393	0.483671	0.1	1000
RTN4	reticulon 4 [Source:HGNC Symbol;Acc:HGNC:14085]	3.29713e-13	0.326482	0.813	0.734	8.23558e-09	mg-TAM 2	All other cells	ND1_7.Neftel_2019_10x Myeloid_cells	4.12437	2.9477	0.1	1000
DNASE2	deoxyribonuclease 2, lysosomal [Source:HGNC Symbol;Acc:HGNC:2960]	3.63719e-13	0.344959	0.655	0.562	9.08497e-09	mg-TAM 2	All other cells	ND1_7.Neftel_2019_10x Myeloid_cells	2.68017	1.86906	0.1	1000
CHI3L1	chitinase 3 like 1 [Source:HGNC Symbol;Acc:HGNC:1932]	3.92593e-13	-1.30258	0.101	0.201	9.8062e-09	mg-TAM 2	All other cells	ND1_7.Neftel_2019_10x Myeloid_cells	0.384545	1.68253	0.1	1000
POLD4	DNA polymerase delta 4, accessory subunit [Source:HGNC Symbol;Acc:HGNC:14106]	4.21949e-13	-0.352003	0.233	0.381	1.05394e-08	mg-TAM 2	All other cells	ND1_7.Neftel_2019_10x Myeloid_cells	0.750726	1.10966	0.1	1000
DNAJA1	DnaJ heat shock protein family (Hsp40) member A1 [Source:HGNC Symbol;Acc:HGNC:5229]	4.228e-13	-0.577502	0.313	0.491	1.05607e-08	mg-TAM 2	All other cells	ND1_7.Neftel_2019_10x Myeloid_cells	0.843064	1.58015	0.1	1000
CHCHD10	coiled-coil-helix-coiled-coil-helix domain containing 10 [Source:HGNC Symbol;Acc:HGNC:15559]	4.42739e-13	0.264533	0.779	0.698	1.10587e-08	mg-TAM 2	All other cells	ND1_7.Neftel_2019_10x Myeloid_cells	3.65984	2.78592	0.1	1000
F13A1	coagulation factor XIII A chain [Source:HGNC Symbol;Acc:HGNC:3531]	5.06419e-13	-0.763113	0.055	0.151	1.26493e-08	mg-TAM 2	All other cells	ND1_7.Neftel_2019_10x Myeloid_cells	0.203743	0.551512	0.1	1000
UPP1	uridine phosphorylase 1 [Source:HGNC Symbol;Acc:HGNC:12576]	5.16701e-13	-0.71293	0.162	0.307	1.29062e-08	mg-TAM 2	All other cells	ND1_7.Neftel_2019_10x Myeloid_cells	0.354453	0.827066	0.1	1000
C1orf54	chromosome 1 open reading frame 54 [Source:HGNC Symbol;Acc:HGNC:26258]	5.40806e-13	0.342639	0.603	0.504	1.35083e-08	mg-TAM 2	All other cells	ND1_7.Neftel_2019_10x Myeloid_cells	2.0923	1.4563	0.1	1000
GPR84	G protein-coupled receptor 84 [Source:HGNC Symbol;Acc:HGNC:4535]	5.72862e-13	-0.42864	0.087	0.182	1.4309e-08	mg-TAM 2	All other cells	ND1_7.Neftel_2019_10x Myeloid_cells	0.202463	0.364332	0.1	1000
AHR	aryl hydrocarbon receptor [Source:HGNC Symbol;Acc:HGNC:348]	5.89376e-13	-0.804958	0.023	0.123	1.47214e-08	mg-TAM 2	All other cells	ND1_7.Neftel_2019_10x Myeloid_cells	0.0550013	0.246676	0.1	1000
BCAT1	branched chain amino acid transaminase 1 [Source:HGNC Symbol;Acc:HGNC:976]	6.01028e-13	-0.639325	0.067	0.176	1.50125e-08	mg-TAM 2	All other cells	ND1_7.Neftel_2019_10x Myeloid_cells	0.139365	0.353644	0.1	1000
SELK		6.5014e-13	-0.748076	0.407	0.617	1.62392e-08	mg-TAM 2	All other cells	ND1_7.Neftel_2019_10x Myeloid_cells	1.12729	2.49317	0.1	1000
PADI2	peptidyl arginine deiminase 2 [Source:HGNC Symbol;Acc:HGNC:18341]	6.54549e-13	0.382755	0.57	0.443	1.63493e-08	mg-TAM 2	All other cells	ND1_7.Neftel_2019_10x Myeloid_cells	2.21796	1.48081	0.1	1000
RAC2	Rac family small GTPase 2 [Source:HGNC Symbol;Acc:HGNC:9802]	6.74066e-13	-0.411995	0.179	0.306	1.68368e-08	mg-TAM 2	All other cells	ND1_7.Neftel_2019_10x Myeloid_cells	0.393414	0.64497	0.1	1000
ISG20	interferon stimulated exonuclease gene 20 [Source:HGNC Symbol;Acc:HGNC:6130]	8.53597e-13	-0.833998	0.044	0.124	2.13212e-08	mg-TAM 2	All other cells	ND1_7.Neftel_2019_10x Myeloid_cells	0.0901998	0.337936	0.1	1000
SCIN	scinderin [Source:HGNC Symbol;Acc:HGNC:21695]	1.06397e-12	0.296673	0.604	0.46	2.65757e-08	mg-TAM 2	All other cells	ND1_7.Neftel_2019_10x Myeloid_cells	2.4447	1.79144	0.1	1000
DOCK8	dedicator of cytokinesis 8 [Source:HGNC Symbol;Acc:HGNC:19191]	1.15815e-12	0.454406	0.511	0.423	2.89282e-08	mg-TAM 2	All other cells	ND1_7.Neftel_2019_10x Myeloid_cells	1.51735	0.926733	0.1	1000
PLAU	plasminogen activator, urokinase [Source:HGNC Symbol;Acc:HGNC:9052]	1.18629e-12	-0.765402	0.071	0.182	2.96311e-08	mg-TAM 2	All other cells	ND1_7.Neftel_2019_10x Myeloid_cells	0.157862	0.454366	0.1	1000
MYO1F	myosin IF [Source:HGNC Symbol;Acc:HGNC:7600]	1.21633e-12	0.429014	0.553	0.478	3.03815e-08	mg-TAM 2	All other cells	ND1_7.Neftel_2019_10x Myeloid_cells	1.77212	1.11903	0.1	1000
C6orf48		1.28541e-12	0.345102	0.669	0.584	3.21069e-08	mg-TAM 2	All other cells	ND1_7.Neftel_2019_10x Myeloid_cells	2.63435	1.83633	0.1	1000
IQGAP1	IQ motif containing GTPase activating protein 1 [Source:HGNC Symbol;Acc:HGNC:6110]	1.32114e-12	-0.371351	0.187	0.344	3.29995e-08	mg-TAM 2	All other cells	ND1_7.Neftel_2019_10x Myeloid_cells	0.434888	0.675422	0.1	1000
ENO1	enolase 1 [Source:HGNC Symbol;Acc:HGNC:3350]	1.36156e-12	-0.529254	0.775	0.802	3.40091e-08	mg-TAM 2	All other cells	ND1_7.Neftel_2019_10x Myeloid_cells	3.50045	6.01236	0.1	1000
BHLHE40	basic helix-loop-helix family member e40 [Source:HGNC Symbol;Acc:HGNC:1046]	1.56562e-12	-0.748667	0.096	0.242	3.91061e-08	mg-TAM 2	All other cells	ND1_7.Neftel_2019_10x Myeloid_cells	0.21399	0.563831	0.1	1000
SEPT9		1.56936e-12	-0.518089	0.06	0.163	3.91996e-08	mg-TAM 2	All other cells	ND1_7.Neftel_2019_10x Myeloid_cells	0.118401	0.266655	0.1	1000
GPSM3	G protein signaling modulator 3 [Source:HGNC Symbol;Acc:HGNC:13945]	1.61826e-12	0.281426	0.769	0.72	4.04208e-08	mg-TAM 2	All other cells	ND1_7.Neftel_2019_10x Myeloid_cells	3.45733	2.58474	0.1	1000
RP11-597D13.8		1.71339e-12	0.757246	0.279	0.148	4.27972e-08	mg-TAM 2	All other cells	ND1_7.Neftel_2019_10x Myeloid_cells	0.692628	0.271708	0.1	1000
MTRNR2L8	MT-RNR2 like 8 [Source:HGNC Symbol;Acc:HGNC:37165]	2.15317e-12	-0.563796	0.101	0.18	5.3782e-08	mg-TAM 2	All other cells	ND1_7.Neftel_2019_10x Myeloid_cells	0.390991	0.762833	0.1	1000
HSPD1	heat shock protein family D (Hsp60) member 1 [Source:HGNC Symbol;Acc:HGNC:5261]	2.29539e-12	-0.676724	0.336	0.499	5.73344e-08	mg-TAM 2	All other cells	ND1_7.Neftel_2019_10x Myeloid_cells	0.887823	1.84346	0.1	1000
RBM47	RNA binding motif protein 47 [Source:HGNC Symbol;Acc:HGNC:30358]	2.47816e-12	-0.345609	0.139	0.267	6.18996e-08	mg-TAM 2	All other cells	ND1_7.Neftel_2019_10x Myeloid_cells	0.314842	0.48611	0.1	1000
CXCL3	C-X-C motif chemokine ligand 3 [Source:HGNC Symbol;Acc:HGNC:4604]	2.64966e-12	-2.31629	0.031	0.115	6.61831e-08	mg-TAM 2	All other cells	ND1_7.Neftel_2019_10x Myeloid_cells	0.0636589	1.55917	0.1	1000
PPIF	peptidylprolyl isomerase F [Source:HGNC Symbol;Acc:HGNC:9259]	2.67787e-12	-0.516756	0.168	0.331	6.68879e-08	mg-TAM 2	All other cells	ND1_7.Neftel_2019_10x Myeloid_cells	0.376592	0.699045	0.1	1000
ETF1	eukaryotic translation termination factor 1 [Source:HGNC Symbol;Acc:HGNC:3477]	2.77616e-12	-0.401323	0.18	0.315	6.93429e-08	mg-TAM 2	All other cells	ND1_7.Neftel_2019_10x Myeloid_cells	0.391286	0.633883	0.1	1000
CCL20	C-C motif chemokine ligand 20 [Source:HGNC Symbol;Acc:HGNC:10619]	3.01556e-12	-1.83425	0.031	0.112	7.53225e-08	mg-TAM 2	All other cells	ND1_7.Neftel_2019_10x Myeloid_cells	0.072433	0.979511	0.1	1000
LIMD2	LIM domain containing 2 [Source:HGNC Symbol;Acc:HGNC:28142]	3.20195e-12	0.472228	0.483	0.373	7.99784e-08	mg-TAM 2	All other cells	ND1_7.Neftel_2019_10x Myeloid_cells	1.48704	0.889694	0.1	1000
ABCC4	ATP binding cassette subfamily C member 4 [Source:HGNC Symbol;Acc:HGNC:55]	3.20339e-12	0.52069	0.169	0.114	8.00144e-08	mg-TAM 2	All other cells	ND1_7.Neftel_2019_10x Myeloid_cells	0.373185	0.181124	0.1	1000
SAP30	Sin3A associated protein 30 [Source:HGNC Symbol;Acc:HGNC:10532]	3.24957e-12	-0.500873	0.076	0.189	8.11678e-08	mg-TAM 2	All other cells	ND1_7.Neftel_2019_10x Myeloid_cells	0.161571	0.331635	0.1	1000
TFRC	transferrin receptor [Source:HGNC Symbol;Acc:HGNC:11763]	3.38496e-12	-0.834161	0.071	0.217	8.45495e-08	mg-TAM 2	All other cells	ND1_7.Neftel_2019_10x Myeloid_cells	0.193911	0.576841	0.1	1000
ARHGAP18	Rho GTPase activating protein 18 [Source:HGNC Symbol;Acc:HGNC:21035]	3.65339e-12	-0.417524	0.275	0.448	9.12543e-08	mg-TAM 2	All other cells	ND1_7.Neftel_2019_10x Myeloid_cells	0.679257	1.08307	0.1	1000
TXN	thioredoxin [Source:HGNC Symbol;Acc:HGNC:12435]	3.98216e-12	-0.555708	0.413	0.581	9.94664e-08	mg-TAM 2	All other cells	ND1_7.Neftel_2019_10x Myeloid_cells	1.10638	2.00292	0.1	1000
MAP2K3	mitogen-activated protein kinase kinase 3 [Source:HGNC Symbol;Acc:HGNC:6843]	4.0053e-12	-0.486411	0.087	0.193	1.00044e-07	mg-TAM 2	All other cells	ND1_7.Neftel_2019_10x Myeloid_cells	0.17033	0.339683	0.1	1000
ABCA1	ATP binding cassette subfamily A member 1 [Source:HGNC Symbol;Acc:HGNC:29]	4.135e-12	-0.563647	0.152	0.299	1.03284e-07	mg-TAM 2	All other cells	ND1_7.Neftel_2019_10x Myeloid_cells	0.377668	0.739295	0.1	1000
GPX3	glutathione peroxidase 3 [Source:HGNC Symbol;Acc:HGNC:4555]	4.32343e-12	-0.554992	0.093	0.21	1.07991e-07	mg-TAM 2	All other cells	ND1_7.Neftel_2019_10x Myeloid_cells	0.214606	0.448021	0.1	1000
PLXNC1	plexin C1 [Source:HGNC Symbol;Acc:HGNC:9106]	4.80987e-12	-0.476988	0.058	0.157	1.20141e-07	mg-TAM 2	All other cells	ND1_7.Neftel_2019_10x Myeloid_cells	0.127633	0.266765	0.1	1000
ATP6V0C	ATPase H+ transporting V0 subunit c [Source:HGNC Symbol;Acc:HGNC:855]	5.22931e-12	-0.617662	0.129	0.253	1.30618e-07	mg-TAM 2	All other cells	ND1_7.Neftel_2019_10x Myeloid_cells	0.694476	1.37342	0.1	1000
MYO5A	myosin VA [Source:HGNC Symbol;Acc:HGNC:7602]	5.33587e-12	-0.359645	0.05	0.124	1.33279e-07	mg-TAM 2	All other cells	ND1_7.Neftel_2019_10x Myeloid_cells	0.105879	0.194987	0.1	1000
RAB20	RAB20, member RAS oncogene family [Source:HGNC Symbol;Acc:HGNC:18260]	5.5386e-12	-0.572918	0.264	0.457	1.38343e-07	mg-TAM 2	All other cells	ND1_7.Neftel_2019_10x Myeloid_cells	0.659991	1.24779	0.1	1000
TTC14	tetratricopeptide repeat domain 14 [Source:HGNC Symbol;Acc:HGNC:24697]	5.95583e-12	0.638658	0.261	0.167	1.48765e-07	mg-TAM 2	All other cells	ND1_7.Neftel_2019_10x Myeloid_cells	0.666309	0.304611	0.1	1000
POU2F2	POU class 2 homeobox 2 [Source:HGNC Symbol;Acc:HGNC:9213]	6.36961e-12	0.470769	0.44	0.356	1.591e-07	mg-TAM 2	All other cells	ND1_7.Neftel_2019_10x Myeloid_cells	1.36221	0.813179	0.1	1000
ODF3B	outer dense fiber of sperm tails 3B [Source:HGNC Symbol;Acc:HGNC:34388]	6.44626e-12	-0.39665	0.134	0.262	1.61015e-07	mg-TAM 2	All other cells	ND1_7.Neftel_2019_10x Myeloid_cells	0.286097	0.474063	0.1	1000
CSF3R	colony stimulating factor 3 receptor [Source:HGNC Symbol;Acc:HGNC:2439]	6.66906e-12	0.37861	0.548	0.47	1.6658e-07	mg-TAM 2	All other cells	ND1_7.Neftel_2019_10x Myeloid_cells	1.74417	1.16291	0.1	1000
SVBP	small vasohibin binding protein [Source:HGNC Symbol;Acc:HGNC:29204]	6.70108e-12	0.443663	0.429	0.346	1.67379e-07	mg-TAM 2	All other cells	ND1_7.Neftel_2019_10x Myeloid_cells	1.17684	0.719327	0.1	1000
IFI6	interferon alpha inducible protein 6 [Source:HGNC Symbol;Acc:HGNC:4054]	7.04359e-12	-0.527194	0.342	0.472	1.75935e-07	mg-TAM 2	All other cells	ND1_7.Neftel_2019_10x Myeloid_cells	1.68027	2.91608	0.1	1000
LUC7L3	LUC7 like 3 pre-mRNA splicing factor [Source:HGNC Symbol;Acc:HGNC:24309]	7.28662e-12	0.597767	0.456	0.344	1.82005e-07	mg-TAM 2	All other cells	ND1_7.Neftel_2019_10x Myeloid_cells	1.37042	0.708789	0.1	1000
ADAM28	ADAM metallopeptidase domain 28 [Source:HGNC Symbol;Acc:HGNC:206]	8.45643e-12	0.380178	0.463	0.392	2.11225e-07	mg-TAM 2	All other cells	ND1_7.Neftel_2019_10x Myeloid_cells	1.38019	0.912062	0.1	1000
TMEM167A	transmembrane protein 167A [Source:HGNC Symbol;Acc:HGNC:28330]	8.45922e-12	-0.331739	0.267	0.409	2.11294e-07	mg-TAM 2	All other cells	ND1_7.Neftel_2019_10x Myeloid_cells	0.598425	0.873178	0.1	1000
NEDD9	neural precursor cell expressed, developmentally down-regulated 9 [Source:HGNC Symbol;Acc:HGNC:7733]	1.06142e-11	-0.704202	0.051	0.153	2.65121e-07	mg-TAM 2	All other cells	ND1_7.Neftel_2019_10x Myeloid_cells	0.111805	0.328318	0.1	1000
NME2	NME/NM23 nucleoside diphosphate kinase 2 [Source:HGNC Symbol;Acc:HGNC:7850]	1.25505e-11	-0.452123	0.125	0.234	3.13487e-07	mg-TAM 2	All other cells	ND1_7.Neftel_2019_10x Myeloid_cells	0.345914	0.600818	0.1	1000
BLVRB	biliverdin reductase B [Source:HGNC Symbol;Acc:HGNC:1063]	1.36734e-11	-0.577179	0.285	0.447	3.41533e-07	mg-TAM 2	All other cells	ND1_7.Neftel_2019_10x Myeloid_cells	0.698933	1.32291	0.1	1000
TLN2	talin 2 [Source:HGNC Symbol;Acc:HGNC:15447]	1.42591e-11	0.648322	0.259	0.159	3.56164e-07	mg-TAM 2	All other cells	ND1_7.Neftel_2019_10x Myeloid_cells	0.64576	0.289974	0.1	1000
PRKCD	protein kinase C delta [Source:HGNC Symbol;Acc:HGNC:9399]	1.4566e-11	0.553608	0.299	0.225	3.63829e-07	mg-TAM 2	All other cells	ND1_7.Neftel_2019_10x Myeloid_cells	0.745354	0.38597	0.1	1000
RIN2	Ras and Rab interactor 2 [Source:HGNC Symbol;Acc:HGNC:18750]	1.45731e-11	0.636369	0.338	0.224	3.64007e-07	mg-TAM 2	All other cells	ND1_7.Neftel_2019_10x Myeloid_cells	0.970077	0.466296	0.1	1000
CARHSP1	calcium regulated heat stable protein 1 [Source:HGNC Symbol;Acc:HGNC:17150]	1.73448e-11	-0.496239	0.09	0.196	4.33239e-07	mg-TAM 2	All other cells	ND1_7.Neftel_2019_10x Myeloid_cells	0.18955	0.375596	0.1	1000
ATP13A3	ATPase 13A3 [Source:HGNC Symbol;Acc:HGNC:24113]	1.95833e-11	-0.367101	0.08	0.17	4.89152e-07	mg-TAM 2	All other cells	ND1_7.Neftel_2019_10x Myeloid_cells	0.17453	0.296296	0.1	1000
RP11-489O18.1		1.97699e-11	0.701726	0.194	0.098	4.93813e-07	mg-TAM 2	All other cells	ND1_7.Neftel_2019_10x Myeloid_cells	0.471612	0.183365	0.1	1000
SCO2	synthesis of cytochrome C oxidase 2 [Source:HGNC Symbol;Acc:HGNC:10604]	2.04674e-11	-0.351524	0.145	0.254	5.11235e-07	mg-TAM 2	All other cells	ND1_7.Neftel_2019_10x Myeloid_cells	0.322585	0.500591	0.1	1000
STK17B	serine/threonine kinase 17b [Source:HGNC Symbol;Acc:HGNC:11396]	2.10775e-11	-0.485345	0.139	0.256	5.26473e-07	mg-TAM 2	All other cells	ND1_7.Neftel_2019_10x Myeloid_cells	0.31087	0.567555	0.1	1000
GK	glycerol kinase [Source:HGNC Symbol;Acc:HGNC:4289]	2.21067e-11	-0.585204	0.099	0.222	5.52182e-07	mg-TAM 2	All other cells	ND1_7.Neftel_2019_10x Myeloid_cells	0.235071	0.501573	0.1	1000
PMAIP1	phorbol-12-myristate-13-acetate-induced protein 1 [Source:HGNC Symbol;Acc:HGNC:9108]	2.21522e-11	-0.748463	0.064	0.168	5.53317e-07	mg-TAM 2	All other cells	ND1_7.Neftel_2019_10x Myeloid_cells	0.176689	0.484851	0.1	1000
CD52	CD52 molecule [Source:HGNC Symbol;Acc:HGNC:1804]	2.25785e-11	-1.06992	0.075	0.159	5.63967e-07	mg-TAM 2	All other cells	ND1_7.Neftel_2019_10x Myeloid_cells	0.165077	0.672737	0.1	1000
EMILIN2	elastin microfibril interfacer 2 [Source:HGNC Symbol;Acc:HGNC:19881]	2.40562e-11	-0.552148	0.027	0.107	6.00877e-07	mg-TAM 2	All other cells	ND1_7.Neftel_2019_10x Myeloid_cells	0.0587859	0.175808	0.1	1000
PLXDC2	plexin domain containing 2 [Source:HGNC Symbol;Acc:HGNC:21013]	3.02791e-11	0.286671	0.77	0.69	7.56311e-07	mg-TAM 2	All other cells	ND1_7.Neftel_2019_10x Myeloid_cells	3.5757	2.65957	0.1	1000
CALM3	calmodulin 3 [Source:HGNC Symbol;Acc:HGNC:1449]	3.04245e-11	-0.310661	0.391	0.513	7.59942e-07	mg-TAM 2	All other cells	ND1_7.Neftel_2019_10x Myeloid_cells	0.992185	1.3901	0.1	1000
NFIL3	nuclear factor, interleukin 3 regulated [Source:HGNC Symbol;Acc:HGNC:7787]	3.09905e-11	-0.552598	0.048	0.145	7.74081e-07	mg-TAM 2	All other cells	ND1_7.Neftel_2019_10x Myeloid_cells	0.114737	0.273162	0.1	1000
TIAM1	TIAM Rac1 associated GEF 1 [Source:HGNC Symbol;Acc:HGNC:11805]	3.43394e-11	0.606453	0.204	0.129	8.57729e-07	mg-TAM 2	All other cells	ND1_7.Neftel_2019_10x Myeloid_cells	0.484219	0.218564	0.1	1000
INPP5D	inositol polyphosphate-5-phosphatase D [Source:HGNC Symbol;Acc:HGNC:6079]	3.51153e-11	0.605343	0.442	0.319	8.77111e-07	mg-TAM 2	All other cells	ND1_7.Neftel_2019_10x Myeloid_cells	1.26719	0.646329	0.1	1000
PIM3	Pim-3 proto-oncogene, serine/threonine kinase [Source:HGNC Symbol;Acc:HGNC:19310]	3.78438e-11	-0.607283	0.077	0.204	9.45262e-07	mg-TAM 2	All other cells	ND1_7.Neftel_2019_10x Myeloid_cells	0.162663	0.382102	0.1	1000
SLC2A5	solute carrier family 2 member 5 [Source:HGNC Symbol;Acc:HGNC:11010]	3.88317e-11	0.291207	0.573	0.477	9.69939e-07	mg-TAM 2	All other cells	ND1_7.Neftel_2019_10x Myeloid_cells	2.06998	1.52176	0.1	1000
IQGAP2	IQ motif containing GTPase activating protein 2 [Source:HGNC Symbol;Acc:HGNC:6111]	4.16618e-11	-0.598605	0.025	0.109	1.04063e-06	mg-TAM 2	All other cells	ND1_7.Neftel_2019_10x Myeloid_cells	0.0559471	0.183758	0.1	1000
BST2	bone marrow stromal cell antigen 2 [Source:HGNC Symbol;Acc:HGNC:1119]	4.54559e-11	-0.26957	0.618	0.73	1.1354e-06	mg-TAM 2	All other cells	ND1_7.Neftel_2019_10x Myeloid_cells	2.71278	3.58305	0.1	1000
P4HA1	prolyl 4-hydroxylase subunit alpha 1 [Source:HGNC Symbol;Acc:HGNC:8546]	4.6881e-11	-0.457412	0.145	0.271	1.17099e-06	mg-TAM 2	All other cells	ND1_7.Neftel_2019_10x Myeloid_cells	0.339327	0.594128	0.1	1000
MAFB	MAF bZIP transcription factor B [Source:HGNC Symbol;Acc:HGNC:6408]	5.20978e-11	-0.257328	0.518	0.651	1.3013e-06	mg-TAM 2	All other cells	ND1_7.Neftel_2019_10x Myeloid_cells	3.10833	4.04987	0.1	1000
ZMIZ1	zinc finger MIZ-type containing 1 [Source:HGNC Symbol;Acc:HGNC:16493]	5.37568e-11	-0.435085	0.07	0.162	1.34274e-06	mg-TAM 2	All other cells	ND1_7.Neftel_2019_10x Myeloid_cells	0.14205	0.273989	0.1	1000
GRASP		5.95141e-11	-0.592869	0.063	0.159	1.48654e-06	mg-TAM 2	All other cells	ND1_7.Neftel_2019_10x Myeloid_cells	0.151265	0.354581	0.1	1000
MT1G	metallothionein 1G [Source:HGNC Symbol;Acc:HGNC:7399]	6.68061e-11	-2.60811	0.043	0.119	1.66868e-06	mg-TAM 2	All other cells	ND1_7.Neftel_2019_10x Myeloid_cells	0.0936162	2.52802	0.1	1000
JUND	JunD proto-oncogene, AP-1 transcription factor subunit [Source:HGNC Symbol;Acc:HGNC:6206]	6.80553e-11	-0.545654	0.267	0.434	1.69989e-06	mg-TAM 2	All other cells	ND1_7.Neftel_2019_10x Myeloid_cells	0.690303	1.26385	0.1	1000
RNASE1	ribonuclease A family member 1, pancreatic [Source:HGNC Symbol;Acc:HGNC:10044]	7.19766e-11	-1.30344	0.172	0.29	1.79783e-06	mg-TAM 2	All other cells	ND1_7.Neftel_2019_10x Myeloid_cells	1.31305	5.10278	0.1	1000
RAP2B	RAP2B, member of RAS oncogene family [Source:HGNC Symbol;Acc:HGNC:9862]	7.34887e-11	-0.441827	0.131	0.274	1.8356e-06	mg-TAM 2	All other cells	ND1_7.Neftel_2019_10x Myeloid_cells	0.288746	0.504713	0.1	1000
CLIC4	chloride intracellular channel 4 [Source:HGNC Symbol;Acc:HGNC:13518]	8.18654e-11	-0.503177	0.034	0.111	2.04483e-06	mg-TAM 2	All other cells	ND1_7.Neftel_2019_10x Myeloid_cells	0.0767853	0.192397	0.1	1000
FABP5	fatty acid binding protein 5 [Source:HGNC Symbol;Acc:HGNC:3560]	8.88053e-11	-0.743692	0.501	0.597	2.21818e-06	mg-TAM 2	All other cells	ND1_7.Neftel_2019_10x Myeloid_cells	1.66572	3.61453	0.1	1000
SYAP1	synapse associated protein 1 [Source:HGNC Symbol;Acc:HGNC:16273]	9.34835e-11	-0.472086	0.191	0.338	2.33503e-06	mg-TAM 2	All other cells	ND1_7.Neftel_2019_10x Myeloid_cells	0.445572	0.774734	0.1	1000
MIR4435-2HG	MIR4435-2 host gene [Source:HGNC Symbol;Acc:HGNC:35163]	1.20285e-10	-0.481549	0.07	0.155	3.00447e-06	mg-TAM 2	All other cells	ND1_7.Neftel_2019_10x Myeloid_cells	0.135329	0.280899	0.1	1000
TMEM70	transmembrane protein 70 [Source:HGNC Symbol;Acc:HGNC:26050]	1.30333e-10	-0.417152	0.281	0.43	3.25547e-06	mg-TAM 2	All other cells	ND1_7.Neftel_2019_10x Myeloid_cells	0.717881	1.14124	0.1	1000
SALL1	spalt like transcription factor 1 [Source:HGNC Symbol;Acc:HGNC:10524]	1.31826e-10	0.670043	0.163	0.082	3.29276e-06	mg-TAM 2	All other cells	ND1_7.Neftel_2019_10x Myeloid_cells	0.356149	0.133405	0.1	1000
ARID5B	AT-rich interaction domain 5B [Source:HGNC Symbol;Acc:HGNC:17362]	1.4562e-10	-0.57618	0.148	0.257	3.6373e-06	mg-TAM 2	All other cells	ND1_7.Neftel_2019_10x Myeloid_cells	0.342052	0.686512	0.1	1000
ARRDC3	arrestin domain containing 3 [Source:HGNC Symbol;Acc:HGNC:29263]	1.64693e-10	-0.43746	0.113	0.224	4.11371e-06	mg-TAM 2	All other cells	ND1_7.Neftel_2019_10x Myeloid_cells	0.292532	0.507941	0.1	1000
HAVCR2	hepatitis A virus cellular receptor 2 [Source:HGNC Symbol;Acc:HGNC:18437]	1.71654e-10	0.33192	0.708	0.627	4.28756e-06	mg-TAM 2	All other cells	ND1_7.Neftel_2019_10x Myeloid_cells	2.94918	2.08792	0.1	1000
EIF5A	eukaryotic translation initiation factor 5A [Source:HGNC Symbol;Acc:HGNC:3300]	1.75816e-10	-0.378687	0.368	0.515	4.39153e-06	mg-TAM 2	All other cells	ND1_7.Neftel_2019_10x Myeloid_cells	0.957604	1.44449	0.1	1000
GNG10	G protein subunit gamma 10 [Source:HGNC Symbol;Acc:HGNC:4402]	1.80845e-10	-0.495219	0.08	0.172	4.51715e-06	mg-TAM 2	All other cells	ND1_7.Neftel_2019_10x Myeloid_cells	0.208686	0.40651	0.1	1000
CISD2	CDGSH iron sulfur domain 2 [Source:HGNC Symbol;Acc:HGNC:24212]	1.89572e-10	-0.459751	0.207	0.362	4.73513e-06	mg-TAM 2	All other cells	ND1_7.Neftel_2019_10x Myeloid_cells	0.451807	0.773885	0.1	1000
C2	complement C2 [Source:HGNC Symbol;Acc:HGNC:1248]	1.90869e-10	0.399835	0.386	0.295	4.76752e-06	mg-TAM 2	All other cells	ND1_7.Neftel_2019_10x Myeloid_cells	1.09426	0.700666	0.1	1000
AXL	AXL receptor tyrosine kinase [Source:HGNC Symbol;Acc:HGNC:905]	2.06362e-10	0.354919	0.588	0.484	5.15452e-06	mg-TAM 2	All other cells	ND1_7.Neftel_2019_10x Myeloid_cells	2.38109	1.63982	0.1	1000
STMN1	stathmin 1 [Source:HGNC Symbol;Acc:HGNC:6510]	2.15043e-10	-0.682962	0.245	0.358	5.37135e-06	mg-TAM 2	All other cells	ND1_7.Neftel_2019_10x Myeloid_cells	0.616578	1.31863	0.1	1000
SEC61B	SEC61 translocon subunit beta [Source:HGNC Symbol;Acc:HGNC:16993]	2.41673e-10	-0.316665	0.65	0.749	6.03652e-06	mg-TAM 2	All other cells	ND1_7.Neftel_2019_10x Myeloid_cells	2.24391	3.11711	0.1	1000
ISG15	ISG15 ubiquitin like modifier [Source:HGNC Symbol;Acc:HGNC:4053]	2.42541e-10	-0.955136	0.304	0.437	6.0582e-06	mg-TAM 2	All other cells	ND1_7.Neftel_2019_10x Myeloid_cells	1.00506	2.77207	0.1	1000
MT3	metallothionein 3 [Source:HGNC Symbol;Acc:HGNC:7408]	2.5691e-10	-0.7964	0.09	0.196	6.41709e-06	mg-TAM 2	All other cells	ND1_7.Neftel_2019_10x Myeloid_cells	0.232044	0.636322	0.1	1000
HTRA1	HtrA serine peptidase 1 [Source:HGNC Symbol;Acc:HGNC:9476]	2.61147e-10	0.350147	0.584	0.514	6.52294e-06	mg-TAM 2	All other cells	ND1_7.Neftel_2019_10x Myeloid_cells	2.28276	1.57885	0.1	1000
CTTNBP2NL	CTTNBP2 N-terminal like [Source:HGNC Symbol;Acc:HGNC:25330]	2.64672e-10	0.626463	0.287	0.197	6.61098e-06	mg-TAM 2	All other cells	ND1_7.Neftel_2019_10x Myeloid_cells	0.717903	0.337152	0.1	1000
IRAK1	interleukin 1 receptor associated kinase 1 [Source:HGNC Symbol;Acc:HGNC:6112]	2.73089e-10	-0.343236	0.109	0.194	6.82121e-06	mg-TAM 2	All other cells	ND1_7.Neftel_2019_10x Myeloid_cells	0.226767	0.360578	0.1	1000
CDKN1A	cyclin dependent kinase inhibitor 1A [Source:HGNC Symbol;Acc:HGNC:1784]	2.82128e-10	-0.598141	0.269	0.453	7.047e-06	mg-TAM 2	All other cells	ND1_7.Neftel_2019_10x Myeloid_cells	1.15647	2.18518	0.1	1000
ATP1B3	ATPase Na+/K+ transporting subunit beta 3 [Source:HGNC Symbol;Acc:HGNC:806]	3.53491e-10	-0.39276	0.432	0.586	8.8295e-06	mg-TAM 2	All other cells	ND1_7.Neftel_2019_10x Myeloid_cells	1.25107	1.90102	0.1	1000
ATM	ATM serine/threonine kinase [Source:HGNC Symbol;Acc:HGNC:795]	3.57441e-10	0.507346	0.362	0.278	8.92815e-06	mg-TAM 2	All other cells	ND1_7.Neftel_2019_10x Myeloid_cells	0.973942	0.546611	0.1	1000
NCKAP1L	NCK associated protein 1 like [Source:HGNC Symbol;Acc:HGNC:4862]	3.71599e-10	0.379367	0.509	0.451	9.2818e-06	mg-TAM 2	All other cells	ND1_7.Neftel_2019_10x Myeloid_cells	1.48701	0.985981	0.1	1000
RNF144B	ring finger protein 144B [Source:HGNC Symbol;Acc:HGNC:21578]	3.74476e-10	-0.587414	0.132	0.254	9.35367e-06	mg-TAM 2	All other cells	ND1_7.Neftel_2019_10x Myeloid_cells	0.322988	0.661095	0.1	1000
ANKH	ANKH inorganic pyrophosphate transport regulator [Source:HGNC Symbol;Acc:HGNC:15492]	3.84336e-10	-0.355944	0.115	0.209	9.59994e-06	mg-TAM 2	All other cells	ND1_7.Neftel_2019_10x Myeloid_cells	0.250041	0.399693	0.1	1000
DDIT3	DNA damage inducible transcript 3 [Source:HGNC Symbol;Acc:HGNC:2726]	4.0332e-10	-0.554993	0.116	0.236	1.00741e-05	mg-TAM 2	All other cells	ND1_7.Neftel_2019_10x Myeloid_cells	0.311772	0.617278	0.1	1000
A1BG	alpha-1-B glycoprotein [Source:HGNC Symbol;Acc:HGNC:5]	4.37775e-10	-0.395238	0.105	0.22	1.09348e-05	mg-TAM 2	All other cells	ND1_7.Neftel_2019_10x Myeloid_cells	0.247093	0.415341	0.1	1000
H2AFJ		5.26817e-10	-0.292258	0.309	0.439	1.31588e-05	mg-TAM 2	All other cells	ND1_7.Neftel_2019_10x Myeloid_cells	0.769204	1.06425	0.1	1000
HLA-DQA2	major histocompatibility complex, class II, DQ alpha 2 [Source:HGNC Symbol;Acc:HGNC:4943]	5.38723e-10	-0.656094	0.135	0.267	1.34562e-05	mg-TAM 2	All other cells	ND1_7.Neftel_2019_10x Myeloid_cells	0.6653	1.37492	0.1	1000
LILRB2	leukocyte immunoglobulin like receptor B2 [Source:HGNC Symbol;Acc:HGNC:6606]	5.56349e-10	-0.577989	0.047	0.141	1.38965e-05	mg-TAM 2	All other cells	ND1_7.Neftel_2019_10x Myeloid_cells	0.103701	0.263086	0.1	1000
GABARAPL1	GABA type A receptor associated protein like 1 [Source:HGNC Symbol;Acc:HGNC:4068]	5.84036e-10	-0.355296	0.239	0.365	1.4588e-05	mg-TAM 2	All other cells	ND1_7.Neftel_2019_10x Myeloid_cells	0.586472	0.879323	0.1	1000
BIN2	bridging integrator 2 [Source:HGNC Symbol;Acc:HGNC:1053]	6.04265e-10	0.548109	0.483	0.378	1.50933e-05	mg-TAM 2	All other cells	ND1_7.Neftel_2019_10x Myeloid_cells	1.46975	0.807383	0.1	1000
NANS	N-acetylneuraminate synthase [Source:HGNC Symbol;Acc:HGNC:19237]	6.08099e-10	-0.43513	0.315	0.462	1.51891e-05	mg-TAM 2	All other cells	ND1_7.Neftel_2019_10x Myeloid_cells	0.747858	1.21008	0.1	1000
CYCS	cytochrome c, somatic [Source:HGNC Symbol;Acc:HGNC:19986]	7.72171e-10	-0.350747	0.462	0.599	1.92873e-05	mg-TAM 2	All other cells	ND1_7.Neftel_2019_10x Myeloid_cells	1.34867	1.9573	0.1	1000
POLE4	DNA polymerase epsilon 4, accessory subunit [Source:HGNC Symbol;Acc:HGNC:18755]	7.75066e-10	-0.26038	0.193	0.316	1.93596e-05	mg-TAM 2	All other cells	ND1_7.Neftel_2019_10x Myeloid_cells	0.429151	0.586533	0.1	1000
IL10	interleukin 10 [Source:HGNC Symbol;Acc:HGNC:5962]	7.79989e-10	-0.872232	0.073	0.169	1.94826e-05	mg-TAM 2	All other cells	ND1_7.Neftel_2019_10x Myeloid_cells	0.192991	0.600905	0.1	1000
IL4I1	interleukin 4 induced 1 [Source:HGNC Symbol;Acc:HGNC:19094]	8.04708e-10	-0.447712	0.079	0.152	2.01e-05	mg-TAM 2	All other cells	ND1_7.Neftel_2019_10x Myeloid_cells	0.218655	0.398609	0.1	1000
ZNF791	zinc finger protein 791 [Source:HGNC Symbol;Acc:HGNC:26895]	8.98295e-10	0.6683	0.233	0.141	2.24376e-05	mg-TAM 2	All other cells	ND1_7.Neftel_2019_10x Myeloid_cells	0.576354	0.246685	0.1	1000
SLAMF8	SLAM family member 8 [Source:HGNC Symbol;Acc:HGNC:21391]	9.0522e-10	-0.334456	0.074	0.163	2.26106e-05	mg-TAM 2	All other cells	ND1_7.Neftel_2019_10x Myeloid_cells	0.162267	0.266434	0.1	1000
MPHOSPH6	M-phase phosphoprotein 6 [Source:HGNC Symbol;Acc:HGNC:7214]	9.2078e-10	-0.531777	0.08	0.185	2.29992e-05	mg-TAM 2	All other cells	ND1_7.Neftel_2019_10x Myeloid_cells	0.176093	0.369898	0.1	1000
C20orf27	chromosome 20 open reading frame 27 [Source:HGNC Symbol;Acc:HGNC:15873]	1.08156e-09	0.356183	0.515	0.455	2.70151e-05	mg-TAM 2	All other cells	ND1_7.Neftel_2019_10x Myeloid_cells	1.5592	1.06201	0.1	1000
MT-ATP8	mitochondrially encoded ATP synthase membrane subunit 8 [Source:HGNC Symbol;Acc:HGNC:7415]	1.09891e-09	-0.575998	0.163	0.283	2.74485e-05	mg-TAM 2	All other cells	ND1_7.Neftel_2019_10x Myeloid_cells	2.17716	3.95086	0.1	1000
SLC11A1	solute carrier family 11 member 1 [Source:HGNC Symbol;Acc:HGNC:10907]	1.15299e-09	-0.380332	0.554	0.691	2.87994e-05	mg-TAM 2	All other cells	ND1_7.Neftel_2019_10x Myeloid_cells	2.15474	3.19816	0.1	1000
NUCB2	nucleobindin 2 [Source:HGNC Symbol;Acc:HGNC:8044]	1.22212e-09	-0.613376	0.078	0.175	3.05261e-05	mg-TAM 2	All other cells	ND1_7.Neftel_2019_10x Myeloid_cells	0.175426	0.408617	0.1	1000
TIMM17A	translocase of inner mitochondrial membrane 17A [Source:HGNC Symbol;Acc:HGNC:17315]	1.33577e-09	-0.255224	0.148	0.249	3.33648e-05	mg-TAM 2	All other cells	ND1_7.Neftel_2019_10x Myeloid_cells	0.323357	0.446448	0.1	1000
CSRP1	cysteine and glycine rich protein 1 [Source:HGNC Symbol;Acc:HGNC:2469]	1.39465e-09	-0.348263	0.082	0.166	3.48356e-05	mg-TAM 2	All other cells	ND1_7.Neftel_2019_10x Myeloid_cells	0.160395	0.268876	0.1	1000
TOM1	target of myb1 membrane trafficking protein [Source:HGNC Symbol;Acc:HGNC:11982]	1.40868e-09	-0.393949	0.101	0.216	3.51861e-05	mg-TAM 2	All other cells	ND1_7.Neftel_2019_10x Myeloid_cells	0.221873	0.377281	0.1	1000
ARHGAP12	Rho GTPase activating protein 12 [Source:HGNC Symbol;Acc:HGNC:16348]	1.42564e-09	0.544538	0.245	0.172	3.56097e-05	mg-TAM 2	All other cells	ND1_7.Neftel_2019_10x Myeloid_cells	0.578575	0.293648	0.1	1000
TMEM109	transmembrane protein 109 [Source:HGNC Symbol;Acc:HGNC:28771]	1.42928e-09	0.456355	0.46	0.382	3.57005e-05	mg-TAM 2	All other cells	ND1_7.Neftel_2019_10x Myeloid_cells	1.30791	0.792034	0.1	1000
NFKBIZ	NFKB inhibitor zeta [Source:HGNC Symbol;Acc:HGNC:29805]	1.45735e-09	-0.593415	0.152	0.288	3.64017e-05	mg-TAM 2	All other cells	ND1_7.Neftel_2019_10x Myeloid_cells	0.408058	0.819666	0.1	1000
TCEB1		1.68684e-09	-0.368035	0.387	0.543	4.21338e-05	mg-TAM 2	All other cells	ND1_7.Neftel_2019_10x Myeloid_cells	1.00707	1.4996	0.1	1000
MARCKSL1	MARCKS like 1 [Source:HGNC Symbol;Acc:HGNC:7142]	1.7339e-09	-0.7227	0.063	0.155	4.33094e-05	mg-TAM 2	All other cells	ND1_7.Neftel_2019_10x Myeloid_cells	0.142549	0.399647	0.1	1000
OTOA	otoancorin [Source:HGNC Symbol;Acc:HGNC:16378]	1.91898e-09	-0.674731	0.027	0.103	4.79322e-05	mg-TAM 2	All other cells	ND1_7.Neftel_2019_10x Myeloid_cells	0.0620527	0.218191	0.1	1000
HMGB2	high mobility group box 2 [Source:HGNC Symbol;Acc:HGNC:5000]	1.99053e-09	-0.616769	0.312	0.466	4.97196e-05	mg-TAM 2	All other cells	ND1_7.Neftel_2019_10x Myeloid_cells	0.861707	1.68198	0.1	1000
GNS	glucosamine (N-acetyl)-6-sulfatase [Source:HGNC Symbol;Acc:HGNC:4422]	2.0549e-09	-0.439819	0.114	0.235	5.13273e-05	mg-TAM 2	All other cells	ND1_7.Neftel_2019_10x Myeloid_cells	0.247987	0.440225	0.1	1000
GTF3C6	general transcription factor IIIC subunit 6 [Source:HGNC Symbol;Acc:HGNC:20872]	2.2586e-09	-0.304464	0.306	0.444	5.64154e-05	mg-TAM 2	All other cells	ND1_7.Neftel_2019_10x Myeloid_cells	0.733684	1.03039	0.1	1000
SPHK1	sphingosine kinase 1 [Source:HGNC Symbol;Acc:HGNC:11240]	2.26846e-09	-0.366947	0.063	0.143	5.66617e-05	mg-TAM 2	All other cells	ND1_7.Neftel_2019_10x Myeloid_cells	0.129475	0.231206	0.1	1000
LINC00987	long intergenic non-protein coding RNA 987 [Source:HGNC Symbol;Acc:HGNC:48911]	2.27809e-09	0.718723	0.102	0.04	5.69021e-05	mg-TAM 2	All other cells	ND1_7.Neftel_2019_10x Myeloid_cells	0.239568	0.0654968	0.1	1000
CH25H	cholesterol 25-hydroxylase [Source:HGNC Symbol;Acc:HGNC:1907]	2.4097e-09	0.271462	0.479	0.362	6.01895e-05	mg-TAM 2	All other cells	ND1_7.Neftel_2019_10x Myeloid_cells	3.80105	2.87363	0.1	1000
IL13RA1	interleukin 13 receptor subunit alpha 1 [Source:HGNC Symbol;Acc:HGNC:5974]	2.56552e-09	0.330716	0.535	0.488	6.40815e-05	mg-TAM 2	All other cells	ND1_7.Neftel_2019_10x Myeloid_cells	1.61499	1.13206	0.1	1000
CCDC50	coiled-coil domain containing 50 [Source:HGNC Symbol;Acc:HGNC:18111]	2.79132e-09	0.426044	0.412	0.352	6.97216e-05	mg-TAM 2	All other cells	ND1_7.Neftel_2019_10x Myeloid_cells	1.06518	0.660962	0.1	1000
NT5C	5', 3'-nucleotidase, cytosolic [Source:HGNC Symbol;Acc:HGNC:17144]	2.7962e-09	0.491657	0.462	0.39	6.98435e-05	mg-TAM 2	All other cells	ND1_7.Neftel_2019_10x Myeloid_cells	1.31774	0.767106	0.1	1000
TPD52L2	TPD52 like 2 [Source:HGNC Symbol;Acc:HGNC:12007]	2.88657e-09	-0.362853	0.133	0.253	7.21007e-05	mg-TAM 2	All other cells	ND1_7.Neftel_2019_10x Myeloid_cells	0.283363	0.451055	0.1	1000
RAB42	RAB42, member RAS oncogene family [Source:HGNC Symbol;Acc:HGNC:28702]	2.89305e-09	-0.810101	0.052	0.138	7.22625e-05	mg-TAM 2	All other cells	ND1_7.Neftel_2019_10x Myeloid_cells	0.113512	0.380005	0.1	1000
TLR10	toll like receptor 10 [Source:HGNC Symbol;Acc:HGNC:15634]	2.90988e-09	0.760566	0.256	0.14	7.2683e-05	mg-TAM 2	All other cells	ND1_7.Neftel_2019_10x Myeloid_cells	0.641485	0.246572	0.1	1000
UQCC2	ubiquinol-cytochrome c reductase complex assembly factor 2 [Source:HGNC Symbol;Acc:HGNC:21237]	2.94215e-09	-0.317862	0.261	0.389	7.34889e-05	mg-TAM 2	All other cells	ND1_7.Neftel_2019_10x Myeloid_cells	0.608614	0.873768	0.1	1000
CLEC11A	C-type lectin domain containing 11A [Source:HGNC Symbol;Acc:HGNC:10576]	2.94538e-09	-0.520654	0.06	0.144	7.35697e-05	mg-TAM 2	All other cells	ND1_7.Neftel_2019_10x Myeloid_cells	0.11575	0.263135	0.1	1000
WBP5		2.94791e-09	-0.870506	0.048	0.149	7.36329e-05	mg-TAM 2	All other cells	ND1_7.Neftel_2019_10x Myeloid_cells	0.104946	0.389436	0.1	1000
MIR181A1HG	MIR181A1 host gene [Source:HGNC Symbol;Acc:HGNC:48659]	3.01821e-09	-0.371063	0.059	0.137	7.53887e-05	mg-TAM 2	All other cells	ND1_7.Neftel_2019_10x Myeloid_cells	0.140629	0.248738	0.1	1000
CARD16	caspase recruitment domain family member 16 [Source:HGNC Symbol;Acc:HGNC:33701]	3.01934e-09	-0.35348	0.253	0.396	7.54171e-05	mg-TAM 2	All other cells	ND1_7.Neftel_2019_10x Myeloid_cells	0.613969	0.916702	0.1	1000
PTPN1	protein tyrosine phosphatase non-receptor type 1 [Source:HGNC Symbol;Acc:HGNC:9642]	3.31198e-09	-0.335379	0.131	0.235	8.27267e-05	mg-TAM 2	All other cells	ND1_7.Neftel_2019_10x Myeloid_cells	0.280367	0.431932	0.1	1000
MX2	MX dynamin like GTPase 2 [Source:HGNC Symbol;Acc:HGNC:7533]	3.39518e-09	-0.467726	0.091	0.179	8.48049e-05	mg-TAM 2	All other cells	ND1_7.Neftel_2019_10x Myeloid_cells	0.219191	0.409544	0.1	1000
SNHG15	small nucleolar RNA host gene 15 [Source:HGNC Symbol;Acc:HGNC:27797]	3.46144e-09	-0.470896	0.086	0.185	8.64598e-05	mg-TAM 2	All other cells	ND1_7.Neftel_2019_10x Myeloid_cells	0.181345	0.350554	0.1	1000
DUSP3	dual specificity phosphatase 3 [Source:HGNC Symbol;Acc:HGNC:3069]	3.83407e-09	-0.462653	0.057	0.147	9.57673e-05	mg-TAM 2	All other cells	ND1_7.Neftel_2019_10x Myeloid_cells	0.114584	0.24082	0.1	1000
AZIN2	antizyme inhibitor 2 [Source:HGNC Symbol;Acc:HGNC:29957]	4.13361e-09	0.688597	0.19	0.098	0.000103249	mg-TAM 2	All other cells	ND1_7.Neftel_2019_10x Myeloid_cells	0.427311	0.164858	0.1	1000
TMEM176A	transmembrane protein 176A [Source:HGNC Symbol;Acc:HGNC:24930]	4.46543e-09	-0.431972	0.287	0.422	0.000111537	mg-TAM 2	All other cells	ND1_7.Neftel_2019_10x Myeloid_cells	0.957003	1.52809	0.1	1000
POLR2L	RNA polymerase II, I and III subunit L [Source:HGNC Symbol;Acc:HGNC:9199]	4.47968e-09	-0.354268	0.52	0.646	0.000111893	mg-TAM 2	All other cells	ND1_7.Neftel_2019_10x Myeloid_cells	1.56769	2.27669	0.1	1000
ACTN4	actinin alpha 4 [Source:HGNC Symbol;Acc:HGNC:166]	4.53527e-09	-0.300647	0.098	0.185	0.000113282	mg-TAM 2	All other cells	ND1_7.Neftel_2019_10x Myeloid_cells	0.211716	0.321045	0.1	1000
C14orf37		4.80499e-09	0.774773	0.167	0.082	0.000120019	mg-TAM 2	All other cells	ND1_7.Neftel_2019_10x Myeloid_cells	0.390213	0.125894	0.1	1000
AIG1	androgen induced 1 [Source:HGNC Symbol;Acc:HGNC:21607]	4.84784e-09	0.430542	0.388	0.319	0.000121089	mg-TAM 2	All other cells	ND1_7.Neftel_2019_10x Myeloid_cells	1.0409	0.641763	0.1	1000
CRYAB	crystallin alpha B [Source:HGNC Symbol;Acc:HGNC:2389]	4.8604e-09	-0.464236	0.092	0.16	0.000121403	mg-TAM 2	All other cells	ND1_7.Neftel_2019_10x Myeloid_cells	0.278854	0.502681	0.1	1000
PTGER4	prostaglandin E receptor 4 [Source:HGNC Symbol;Acc:HGNC:9596]	4.93571e-09	-0.522306	0.14	0.272	0.000123284	mg-TAM 2	All other cells	ND1_7.Neftel_2019_10x Myeloid_cells	0.337481	0.637553	0.1	1000
JOSD1	Josephin domain containing 1 [Source:HGNC Symbol;Acc:HGNC:28953]	5.31119e-09	-0.352561	0.076	0.156	0.000132663	mg-TAM 2	All other cells	ND1_7.Neftel_2019_10x Myeloid_cells	0.149543	0.255027	0.1	1000
RASGRP3	RAS guanyl releasing protein 3 [Source:HGNC Symbol;Acc:HGNC:14545]	6.14244e-09	-0.460215	0.054	0.127	0.000153426	mg-TAM 2	All other cells	ND1_7.Neftel_2019_10x Myeloid_cells	0.110042	0.232794	0.1	1000
PRDM1	PR/SET domain 1 [Source:HGNC Symbol;Acc:HGNC:9346]	6.24298e-09	-0.647288	0.097	0.22	0.000155937	mg-TAM 2	All other cells	ND1_7.Neftel_2019_10x Myeloid_cells	0.236078	0.542028	0.1	1000
C1orf61		6.67576e-09	-0.469412	0.12	0.222	0.000166747	mg-TAM 2	All other cells	ND1_7.Neftel_2019_10x Myeloid_cells	0.342445	0.607493	0.1	1000
SHISA5	shisa family member 5 [Source:HGNC Symbol;Acc:HGNC:30376]	6.78983e-09	-0.288443	0.163	0.279	0.000169596	mg-TAM 2	All other cells	ND1_7.Neftel_2019_10x Myeloid_cells	0.387036	0.549876	0.1	1000
ZFAND2A	zinc finger AN1-type containing 2A [Source:HGNC Symbol;Acc:HGNC:28073]	6.85264e-09	-0.853517	0.085	0.177	0.000171165	mg-TAM 2	All other cells	ND1_7.Neftel_2019_10x Myeloid_cells	0.176643	0.549527	0.1	1000
IVNS1ABP	influenza virus NS1A binding protein [Source:HGNC Symbol;Acc:HGNC:16951]	7.05362e-09	-0.355535	0.148	0.261	0.000176185	mg-TAM 2	All other cells	ND1_7.Neftel_2019_10x Myeloid_cells	0.347499	0.538555	0.1	1000
RGS19	regulator of G protein signaling 19 [Source:HGNC Symbol;Acc:HGNC:13735]	7.37153e-09	0.309248	0.616	0.562	0.000184126	mg-TAM 2	All other cells	ND1_7.Neftel_2019_10x Myeloid_cells	2.08938	1.507	0.1	1000
ABHD11	abhydrolase domain containing 11 [Source:HGNC Symbol;Acc:HGNC:16407]	7.48037e-09	0.538798	0.242	0.173	0.000186845	mg-TAM 2	All other cells	ND1_7.Neftel_2019_10x Myeloid_cells	0.570361	0.291122	0.1	1000
MS4A4A	membrane spanning 4-domains A4A [Source:HGNC Symbol;Acc:HGNC:13371]	7.60093e-09	-0.47227	0.431	0.58	0.000189856	mg-TAM 2	All other cells	ND1_7.Neftel_2019_10x Myeloid_cells	1.61619	2.65213	0.1	1000
FKBP4	FKBP prolyl isomerase 4 [Source:HGNC Symbol;Acc:HGNC:3720]	8.4532e-09	-0.418866	0.081	0.175	0.000211144	mg-TAM 2	All other cells	ND1_7.Neftel_2019_10x Myeloid_cells	0.180315	0.326145	0.1	1000
CCDC167	coiled-coil domain containing 167 [Source:HGNC Symbol;Acc:HGNC:21239]	8.50696e-09	-0.390901	0.095	0.19	0.000212487	mg-TAM 2	All other cells	ND1_7.Neftel_2019_10x Myeloid_cells	0.202531	0.347236	0.1	1000
RALA	RAS like proto-oncogene A [Source:HGNC Symbol;Acc:HGNC:9839]	8.68065e-09	-0.522081	0.107	0.217	0.000216825	mg-TAM 2	All other cells	ND1_7.Neftel_2019_10x Myeloid_cells	0.227687	0.452326	0.1	1000
CYSTM1	cysteine rich transmembrane module containing 1 [Source:HGNC Symbol;Acc:HGNC:30239]	8.68727e-09	-0.622145	0.083	0.203	0.000216991	mg-TAM 2	All other cells	ND1_7.Neftel_2019_10x Myeloid_cells	0.168749	0.400658	0.1	1000
AP2S1	adaptor related protein complex 2 subunit sigma 1 [Source:HGNC Symbol;Acc:HGNC:565]	8.70401e-09	-0.313986	0.699	0.756	0.000217409	mg-TAM 2	All other cells	ND1_7.Neftel_2019_10x Myeloid_cells	2.57881	3.56694	0.1	1000
HBB	hemoglobin subunit beta [Source:HGNC Symbol;Acc:HGNC:4827]	8.87867e-09	-0.762544	0.099	0.197	0.000221771	mg-TAM 2	All other cells	ND1_7.Neftel_2019_10x Myeloid_cells	0.468451	1.1186	0.1	1000
RHBDF2	rhomboid 5 homolog 2 [Source:HGNC Symbol;Acc:HGNC:20788]	9.00502e-09	0.336733	0.508	0.455	0.000224927	mg-TAM 2	All other cells	ND1_7.Neftel_2019_10x Myeloid_cells	1.57581	1.0967	0.1	1000
MMP14	matrix metallopeptidase 14 [Source:HGNC Symbol;Acc:HGNC:7160]	9.28231e-09	-0.369254	0.138	0.249	0.000231854	mg-TAM 2	All other cells	ND1_7.Neftel_2019_10x Myeloid_cells	0.313255	0.497837	0.1	1000
RASSF5	Ras association domain family member 5 [Source:HGNC Symbol;Acc:HGNC:17609]	9.43815e-09	-0.317228	0.123	0.225	0.000235746	mg-TAM 2	All other cells	ND1_7.Neftel_2019_10x Myeloid_cells	0.2632	0.398789	0.1	1000
GPI	glucose-6-phosphate isomerase [Source:HGNC Symbol;Acc:HGNC:4458]	9.73407e-09	-0.491745	0.201	0.338	0.000243138	mg-TAM 2	All other cells	ND1_7.Neftel_2019_10x Myeloid_cells	0.444154	0.789782	0.1	1000
TSTD1	thiosulfate sulfurtransferase like domain containing 1 [Source:HGNC Symbol;Acc:HGNC:35410]	9.90341e-09	-0.383105	0.091	0.193	0.000247367	mg-TAM 2	All other cells	ND1_7.Neftel_2019_10x Myeloid_cells	0.199039	0.33864	0.1	1000
LILRA2	leukocyte immunoglobulin like receptor A2 [Source:HGNC Symbol;Acc:HGNC:6603]	1.03109e-08	0.453048	0.389	0.313	0.000257546	mg-TAM 2	All other cells	ND1_7.Neftel_2019_10x Myeloid_cells	1.06409	0.639995	0.1	1000
TMED5	transmembrane p24 trafficking protein 5 [Source:HGNC Symbol;Acc:HGNC:24251]	1.05113e-08	-0.28593	0.212	0.335	0.00026255	mg-TAM 2	All other cells	ND1_7.Neftel_2019_10x Myeloid_cells	0.475416	0.665878	0.1	1000
P2RY6	pyrimidinergic receptor P2Y6 [Source:HGNC Symbol;Acc:HGNC:8543]	1.10501e-08	0.644023	0.258	0.175	0.000276008	mg-TAM 2	All other cells	ND1_7.Neftel_2019_10x Myeloid_cells	0.648348	0.293014	0.1	1000
EVI2A	ecotropic viral integration site 2A [Source:HGNC Symbol;Acc:HGNC:3499]	1.1131e-08	0.369149	0.512	0.444	0.00027803	mg-TAM 2	All other cells	ND1_7.Neftel_2019_10x Myeloid_cells	1.58429	1.06439	0.1	1000
JAM2	junctional adhesion molecule 2 [Source:HGNC Symbol;Acc:HGNC:14686]	1.13497e-08	0.604273	0.209	0.127	0.000283493	mg-TAM 2	All other cells	ND1_7.Neftel_2019_10x Myeloid_cells	0.473137	0.213203	0.1	1000
SATB1	SATB homeobox 1 [Source:HGNC Symbol;Acc:HGNC:10541]	1.14975e-08	-0.40613	0.042	0.103	0.000287185	mg-TAM 2	All other cells	ND1_7.Neftel_2019_10x Myeloid_cells	0.0883539	0.182719	0.1	1000
TNFRSF1B	TNF receptor superfamily member 1B [Source:HGNC Symbol;Acc:HGNC:11917]	1.16546e-08	-0.333387	0.29	0.436	0.00029111	mg-TAM 2	All other cells	ND1_7.Neftel_2019_10x Myeloid_cells	0.759838	1.10007	0.1	1000
ITM2C	integral membrane protein 2C [Source:HGNC Symbol;Acc:HGNC:6175]	1.2493e-08	0.572457	0.312	0.225	0.000312051	mg-TAM 2	All other cells	ND1_7.Neftel_2019_10x Myeloid_cells	0.87508	0.45008	0.1	1000
HPCAL1	hippocalcin like 1 [Source:HGNC Symbol;Acc:HGNC:5145]	1.3466e-08	-0.397189	0.139	0.263	0.000336353	mg-TAM 2	All other cells	ND1_7.Neftel_2019_10x Myeloid_cells	0.288914	0.478563	0.1	1000
NDRG1	N-myc downstream regulated 1 [Source:HGNC Symbol;Acc:HGNC:7679]	1.38507e-08	-0.79296	0.06	0.151	0.000345963	mg-TAM 2	All other cells	ND1_7.Neftel_2019_10x Myeloid_cells	0.123196	0.393247	0.1	1000
FEZ2	fasciculation and elongation protein zeta 2 [Source:HGNC Symbol;Acc:HGNC:3660]	1.44774e-08	0.440329	0.521	0.439	0.000361616	mg-TAM 2	All other cells	ND1_7.Neftel_2019_10x Myeloid_cells	1.52738	0.947749	0.1	1000
OTUD1	OTU deubiquitinase 1 [Source:HGNC Symbol;Acc:HGNC:27346]	1.46514e-08	-0.556801	0.149	0.26	0.000365962	mg-TAM 2	All other cells	ND1_7.Neftel_2019_10x Myeloid_cells	0.397304	0.767836	0.1	1000
RIPK2	receptor interacting serine/threonine kinase 2 [Source:HGNC Symbol;Acc:HGNC:10020]	1.47029e-08	-0.525861	0.091	0.194	0.00036725	mg-TAM 2	All other cells	ND1_7.Neftel_2019_10x Myeloid_cells	0.183953	0.380424	0.1	1000
SMPDL3A	sphingomyelin phosphodiesterase acid like 3A [Source:HGNC Symbol;Acc:HGNC:17389]	1.50588e-08	-0.544425	0.049	0.135	0.000376138	mg-TAM 2	All other cells	ND1_7.Neftel_2019_10x Myeloid_cells	0.104056	0.251714	0.1	1000
U2AF1	U2 small nuclear RNA auxiliary factor 1 [Source:HGNC Symbol;Acc:HGNC:12453]	1.59066e-08	-0.541389	0.096	0.197	0.000397314	mg-TAM 2	All other cells	ND1_7.Neftel_2019_10x Myeloid_cells	0.257092	0.513625	0.1	1000
FCGR2A	Fc fragment of IgG receptor IIa [Source:HGNC Symbol;Acc:HGNC:3616]	1.61832e-08	-0.291412	0.549	0.677	0.000404224	mg-TAM 2	All other cells	ND1_7.Neftel_2019_10x Myeloid_cells	1.94477	2.63654	0.1	1000
FCGR1B	Fc fragment of IgG receptor Ib [Source:HGNC Symbol;Acc:HGNC:3614]	1.68589e-08	0.404851	0.498	0.408	0.000421101	mg-TAM 2	All other cells	ND1_7.Neftel_2019_10x Myeloid_cells	1.73755	1.12578	0.1	1000
ZC3HAV1	zinc finger CCCH-type containing, antiviral 1 [Source:HGNC Symbol;Acc:HGNC:23721]	1.69556e-08	-0.295425	0.111	0.187	0.000423517	mg-TAM 2	All other cells	ND1_7.Neftel_2019_10x Myeloid_cells	0.25741	0.380251	0.1	1000
RBKS	ribokinase [Source:HGNC Symbol;Acc:HGNC:30325]	1.72008e-08	-0.69665	0.057	0.13	0.000429641	mg-TAM 2	All other cells	ND1_7.Neftel_2019_10x Myeloid_cells	0.145919	0.393565	0.1	1000
MUM1		1.74678e-08	0.603354	0.328	0.223	0.00043631	mg-TAM 2	All other cells	ND1_7.Neftel_2019_10x Myeloid_cells	0.823739	0.405261	0.1	1000
SQSTM1	sequestosome 1 [Source:NCBI gene (formerly Entrezgene);Acc:8878]	1.7529e-08	-0.446146	0.429	0.564	0.000437839	mg-TAM 2	All other cells	ND1_7.Neftel_2019_10x Myeloid_cells	1.26681	2.03534	0.1	1000
SLC6A6	solute carrier family 6 member 6 [Source:HGNC Symbol;Acc:HGNC:11052]	1.76706e-08	-0.332821	0.06	0.126	0.000441377	mg-TAM 2	All other cells	ND1_7.Neftel_2019_10x Myeloid_cells	0.116018	0.201322	0.1	1000
AGFG1	ArfGAP with FG repeats 1 [Source:HGNC Symbol;Acc:HGNC:5175]	1.79243e-08	-0.375106	0.043	0.103	0.000447713	mg-TAM 2	All other cells	ND1_7.Neftel_2019_10x Myeloid_cells	0.0848214	0.168942	0.1	1000
RAP1B	RAP1B, member of RAS oncogene family [Source:HGNC Symbol;Acc:HGNC:9857]	1.80813e-08	-0.318375	0.202	0.339	0.000451634	mg-TAM 2	All other cells	ND1_7.Neftel_2019_10x Myeloid_cells	0.49322	0.715614	0.1	1000
PCBD1	pterin-4 alpha-carbinolamine dehydratase 1 [Source:HGNC Symbol;Acc:HGNC:8646]	1.91532e-08	-0.361469	0.202	0.346	0.000478407	mg-TAM 2	All other cells	ND1_7.Neftel_2019_10x Myeloid_cells	0.433686	0.666073	0.1	1000
RUNX3	RUNX family transcription factor 3 [Source:HGNC Symbol;Acc:HGNC:10473]	1.91588e-08	-0.348872	0.04	0.101	0.000478549	mg-TAM 2	All other cells	ND1_7.Neftel_2019_10x Myeloid_cells	0.0839451	0.160736	0.1	1000
LILRA4	leukocyte immunoglobulin like receptor A4 [Source:HGNC Symbol;Acc:HGNC:15503]	1.94459e-08	0.640035	0.214	0.124	0.000485721	mg-TAM 2	All other cells	ND1_7.Neftel_2019_10x Myeloid_cells	0.664389	0.303042	0.1	1000
GCC2	GRIP and coiled-coil domain containing 2 [Source:HGNC Symbol;Acc:HGNC:23218]	1.99836e-08	0.467488	0.365	0.296	0.000499151	mg-TAM 2	All other cells	ND1_7.Neftel_2019_10x Myeloid_cells	0.975435	0.57384	0.1	1000
CEBPA	CCAAT enhancer binding protein alpha [Source:HGNC Symbol;Acc:HGNC:1833]	2.08236e-08	0.453598	0.388	0.316	0.000520133	mg-TAM 2	All other cells	ND1_7.Neftel_2019_10x Myeloid_cells	1.12771	0.680009	0.1	1000
ASPH	aspartate beta-hydroxylase [Source:HGNC Symbol;Acc:HGNC:757]	2.09945e-08	-0.506518	0.069	0.163	0.000524402	mg-TAM 2	All other cells	ND1_7.Neftel_2019_10x Myeloid_cells	0.142566	0.302539	0.1	1000
AC074289.1		2.4572e-08	0.544912	0.195	0.127	0.000613759	mg-TAM 2	All other cells	ND1_7.Neftel_2019_10x Myeloid_cells	0.485921	0.239772	0.1	1000
NRP2	neuropilin 2 [Source:HGNC Symbol;Acc:HGNC:8005]	2.50224e-08	-0.520021	0.097	0.205	0.000625009	mg-TAM 2	All other cells	ND1_7.Neftel_2019_10x Myeloid_cells	0.222749	0.442884	0.1	1000
EMD	emerin [Source:HGNC Symbol;Acc:HGNC:3331]	2.61016e-08	-0.344622	0.171	0.289	0.000651965	mg-TAM 2	All other cells	ND1_7.Neftel_2019_10x Myeloid_cells	0.370915	0.564676	0.1	1000
RILPL2	Rab interacting lysosomal protein like 2 [Source:HGNC Symbol;Acc:HGNC:28787]	2.66784e-08	-0.474276	0.307	0.475	0.000666373	mg-TAM 2	All other cells	ND1_7.Neftel_2019_10x Myeloid_cells	0.776487	1.30838	0.1	1000
ATP2A2	ATPase sarcoplasmic/endoplasmic reticulum Ca2+ transporting 2 [Source:HGNC Symbol;Acc:HGNC:812]	2.91406e-08	-0.378165	0.106	0.212	0.000727874	mg-TAM 2	All other cells	ND1_7.Neftel_2019_10x Myeloid_cells	0.231702	0.384153	0.1	1000
CCRL2	C-C motif chemokine receptor like 2 [Source:HGNC Symbol;Acc:HGNC:1612]	2.94092e-08	-0.314841	0.123	0.203	0.000734584	mg-TAM 2	All other cells	ND1_7.Neftel_2019_10x Myeloid_cells	0.261945	0.39588	0.1	1000
TMIGD2	transmembrane and immunoglobulin domain containing 2 [Source:HGNC Symbol;Acc:HGNC:28324]	3.05776e-08	0.677709	0.127	0.061	0.000763768	mg-TAM 2	All other cells	ND1_7.Neftel_2019_10x Myeloid_cells	0.316235	0.111355	0.1	1000
CDK16	cyclin dependent kinase 16 [Source:HGNC Symbol;Acc:HGNC:8749]	3.30174e-08	-0.357167	0.067	0.141	0.000824708	mg-TAM 2	All other cells	ND1_7.Neftel_2019_10x Myeloid_cells	0.131307	0.230601	0.1	1000
NAPA	NSF attachment protein alpha [Source:HGNC Symbol;Acc:HGNC:7641]	3.35694e-08	-0.29133	0.222	0.36	0.000838497	mg-TAM 2	All other cells	ND1_7.Neftel_2019_10x Myeloid_cells	0.51284	0.720107	0.1	1000
TES	testin LIM domain protein [Source:HGNC Symbol;Acc:HGNC:14620]	3.3657e-08	-0.344122	0.051	0.121	0.000840684	mg-TAM 2	All other cells	ND1_7.Neftel_2019_10x Myeloid_cells	0.109604	0.1957	0.1	1000
ENPP1	ectonucleotide pyrophosphatase/phosphodiesterase 1 [Source:HGNC Symbol;Acc:HGNC:3356]	3.57956e-08	0.610966	0.113	0.054	0.000894104	mg-TAM 2	All other cells	ND1_7.Neftel_2019_10x Myeloid_cells	0.265111	0.0981915	0.1	1000
RHOBTB3	Rho related BTB domain containing 3 [Source:HGNC Symbol;Acc:HGNC:18757]	3.84311e-08	-0.353842	0.042	0.105	0.000959931	mg-TAM 2	All other cells	ND1_7.Neftel_2019_10x Myeloid_cells	0.0997622	0.184567	0.1	1000
SLC43A3	solute carrier family 43 member 3 [Source:HGNC Symbol;Acc:HGNC:17466]	4.08262e-08	-0.425616	0.07	0.154	0.00101976	mg-TAM 2	All other cells	ND1_7.Neftel_2019_10x Myeloid_cells	0.146185	0.276793	0.1	1000
YPEL5	yippee like 5 [Source:HGNC Symbol;Acc:HGNC:18329]	4.15365e-08	-0.44875	0.262	0.401	0.0010375	mg-TAM 2	All other cells	ND1_7.Neftel_2019_10x Myeloid_cells	0.622488	1.03167	0.1	1000
HCFC1R1	host cell factor C1 regulator 1 [Source:HGNC Symbol;Acc:HGNC:21198]	4.34515e-08	-0.32027	0.171	0.288	0.00108533	mg-TAM 2	All other cells	ND1_7.Neftel_2019_10x Myeloid_cells	0.3817	0.563541	0.1	1000
GUK1	guanylate kinase 1 [Source:HGNC Symbol;Acc:HGNC:4693]	4.52539e-08	-0.359793	0.579	0.716	0.00113035	mg-TAM 2	All other cells	ND1_7.Neftel_2019_10x Myeloid_cells	1.78827	2.60595	0.1	1000
KIFC3	kinesin family member C3 [Source:HGNC Symbol;Acc:HGNC:6326]	4.53185e-08	-0.333628	0.066	0.142	0.00113197	mg-TAM 2	All other cells	ND1_7.Neftel_2019_10x Myeloid_cells	0.128256	0.21865	0.1	1000
UTP6	UTP6 small subunit processome component [Source:HGNC Symbol;Acc:HGNC:18279]	4.59816e-08	0.424188	0.249	0.198	0.00114853	mg-TAM 2	All other cells	ND1_7.Neftel_2019_10x Myeloid_cells	0.567892	0.337002	0.1	1000
FGF20	fibroblast growth factor 20 [Source:HGNC Symbol;Acc:HGNC:3677]	4.63476e-08	0.595195	0.116	0.058	0.00115767	mg-TAM 2	All other cells	ND1_7.Neftel_2019_10x Myeloid_cells	0.256694	0.096701	0.1	1000
UBE2S	ubiquitin conjugating enzyme E2 S [Source:HGNC Symbol;Acc:HGNC:17895]	4.78107e-08	-0.264197	0.051	0.106	0.00119422	mg-TAM 2	All other cells	ND1_7.Neftel_2019_10x Myeloid_cells	0.101638	0.16261	0.1	1000
ZYX	zyxin [Source:HGNC Symbol;Acc:HGNC:13200]	5.07583e-08	-0.29619	0.362	0.501	0.00126784	mg-TAM 2	All other cells	ND1_7.Neftel_2019_10x Myeloid_cells	0.999352	1.37833	0.1	1000
DAB2	DAB adaptor protein 2 [Source:HGNC Symbol;Acc:HGNC:2662]	5.46016e-08	-0.38974	0.314	0.457	0.00136384	mg-TAM 2	All other cells	ND1_7.Neftel_2019_10x Myeloid_cells	0.873414	1.33734	0.1	1000
SIGLEC7	sialic acid binding Ig like lectin 7 [Source:HGNC Symbol;Acc:HGNC:10876]	5.74857e-08	-0.348208	0.089	0.184	0.00143588	mg-TAM 2	All other cells	ND1_7.Neftel_2019_10x Myeloid_cells	0.18059	0.297463	0.1	1000
FAM20A	FAM20A golgi associated secretory pathway pseudokinase [Source:HGNC Symbol;Acc:HGNC:23015]	5.80996e-08	-0.291163	0.069	0.141	0.00145121	mg-TAM 2	All other cells	ND1_7.Neftel_2019_10x Myeloid_cells	0.148282	0.232197	0.1	1000
XBP1	X-box binding protein 1 [Source:HGNC Symbol;Acc:HGNC:12801]	5.93558e-08	-0.397533	0.328	0.484	0.00148259	mg-TAM 2	All other cells	ND1_7.Neftel_2019_10x Myeloid_cells	0.895458	1.38139	0.1	1000
SMAP2	small ArfGAP2 [Source:HGNC Symbol;Acc:HGNC:25082]	5.95891e-08	0.309771	0.491	0.443	0.00148842	mg-TAM 2	All other cells	ND1_7.Neftel_2019_10x Myeloid_cells	1.48696	1.06422	0.1	1000
PDE4DIP	phosphodiesterase 4D interacting protein [Source:HGNC Symbol;Acc:HGNC:15580]	5.99943e-08	-0.500382	0.112	0.216	0.00149854	mg-TAM 2	All other cells	ND1_7.Neftel_2019_10x Myeloid_cells	0.260547	0.494668	0.1	1000
IGF1	insulin like growth factor 1 [Source:HGNC Symbol;Acc:HGNC:5464]	6.36572e-08	0.504344	0.269	0.189	0.00159003	mg-TAM 2	All other cells	ND1_7.Neftel_2019_10x Myeloid_cells	0.692118	0.378362	0.1	1000
TLN1	talin 1 [Source:HGNC Symbol;Acc:HGNC:11845]	6.67032e-08	0.310795	0.587	0.537	0.00166611	mg-TAM 2	All other cells	ND1_7.Neftel_2019_10x Myeloid_cells	1.91296	1.37522	0.1	1000
GCHFR	GTP cyclohydrolase I feedback regulator [Source:HGNC Symbol;Acc:HGNC:4194]	6.79227e-08	-0.555489	0.061	0.141	0.00169657	mg-TAM 2	All other cells	ND1_7.Neftel_2019_10x Myeloid_cells	0.119327	0.282242	0.1	1000
FAM26F		6.87289e-08	-0.406301	0.321	0.47	0.00171671	mg-TAM 2	All other cells	ND1_7.Neftel_2019_10x Myeloid_cells	0.933974	1.45226	0.1	1000
LPCAT1	lysophosphatidylcholine acyltransferase 1 [Source:HGNC Symbol;Acc:HGNC:25718]	6.88416e-08	-0.447032	0.048	0.122	0.00171953	mg-TAM 2	All other cells	ND1_7.Neftel_2019_10x Myeloid_cells	0.102315	0.216353	0.1	1000
NFKBID	NFKB inhibitor delta [Source:HGNC Symbol;Acc:HGNC:15671]	7.22506e-08	-0.441654	0.202	0.324	0.00180468	mg-TAM 2	All other cells	ND1_7.Neftel_2019_10x Myeloid_cells	0.536936	0.890613	0.1	1000
PER1	period circadian regulator 1 [Source:HGNC Symbol;Acc:HGNC:8845]	7.97731e-08	-0.351726	0.196	0.325	0.00199257	mg-TAM 2	All other cells	ND1_7.Neftel_2019_10x Myeloid_cells	0.490782	0.739808	0.1	1000
MCF2L	MCF.2 cell line derived transforming sequence like [Source:HGNC Symbol;Acc:HGNC:14576]	8.05581e-08	0.567668	0.197	0.122	0.00201218	mg-TAM 2	All other cells	ND1_7.Neftel_2019_10x Myeloid_cells	0.450706	0.212166	0.1	1000
S100A13	S100 calcium binding protein A13 [Source:HGNC Symbol;Acc:HGNC:10490]	8.0653e-08	0.414769	0.345	0.284	0.00201455	mg-TAM 2	All other cells	ND1_7.Neftel_2019_10x Myeloid_cells	0.945495	0.590542	0.1	1000
B4GALT4	beta-1,4-galactosyltransferase 4 [Source:HGNC Symbol;Acc:HGNC:927]	8.75695e-08	0.507467	0.162	0.114	0.00218731	mg-TAM 2	All other cells	ND1_7.Neftel_2019_10x Myeloid_cells	0.371039	0.183574	0.1	1000
TNFSF13	TNF superfamily member 13 [Source:HGNC Symbol;Acc:HGNC:11928]	9.08384e-08	-0.372206	0.074	0.142	0.00226896	mg-TAM 2	All other cells	ND1_7.Neftel_2019_10x Myeloid_cells	0.223124	0.368831	0.1	1000
NCK1	NCK adaptor protein 1 [Source:HGNC Symbol;Acc:HGNC:7664]	9.14419e-08	0.527211	0.32	0.247	0.00228404	mg-TAM 2	All other cells	ND1_7.Neftel_2019_10x Myeloid_cells	0.81249	0.438596	0.1	1000
INF2	inverted formin 2 [Source:HGNC Symbol;Acc:HGNC:23791]	9.19502e-08	-0.388026	0.044	0.103	0.00229673	mg-TAM 2	All other cells	ND1_7.Neftel_2019_10x Myeloid_cells	0.0895033	0.179341	0.1	1000
AES		9.22225e-08	-0.274461	0.109	0.19	0.00230353	mg-TAM 2	All other cells	ND1_7.Neftel_2019_10x Myeloid_cells	0.226027	0.328993	0.1	1000
TM6SF1	transmembrane 6 superfamily member 1 [Source:HGNC Symbol;Acc:HGNC:11860]	9.23725e-08	0.380924	0.534	0.448	0.00230728	mg-TAM 2	All other cells	ND1_7.Neftel_2019_10x Myeloid_cells	1.64925	1.09514	0.1	1000
SH3KBP1	SH3 domain containing kinase binding protein 1 [Source:HGNC Symbol;Acc:HGNC:13867]	9.3076e-08	0.287701	0.456	0.435	0.00232485	mg-TAM 2	All other cells	ND1_7.Neftel_2019_10x Myeloid_cells	1.25311	0.914811	0.1	1000
MILR1	mast cell immunoglobulin like receptor 1 [Source:HGNC Symbol;Acc:HGNC:27570]	9.96628e-08	0.535922	0.398	0.303	0.00248938	mg-TAM 2	All other cells	ND1_7.Neftel_2019_10x Myeloid_cells	1.08312	0.592278	0.1	1000
CACNA2D4	calcium voltage-gated channel auxiliary subunit alpha2delta 4 [Source:HGNC Symbol;Acc:HGNC:20202]	1.04926e-07	-0.32927	0.091	0.171	0.00262084	mg-TAM 2	All other cells	ND1_7.Neftel_2019_10x Myeloid_cells	0.194257	0.309004	0.1	1000
CORO1B	coronin 1B [Source:HGNC Symbol;Acc:HGNC:2253]	1.13282e-07	0.310982	0.567	0.522	0.00282956	mg-TAM 2	All other cells	ND1_7.Neftel_2019_10x Myeloid_cells	1.73816	1.24687	0.1	1000
FAM49A		1.15168e-07	-0.377556	0.115	0.216	0.00287668	mg-TAM 2	All other cells	ND1_7.Neftel_2019_10x Myeloid_cells	0.246601	0.405592	0.1	1000
ACOT13	acyl-CoA thioesterase 13 [Source:HGNC Symbol;Acc:HGNC:20999]	1.15897e-07	-0.284941	0.114	0.185	0.00289488	mg-TAM 2	All other cells	ND1_7.Neftel_2019_10x Myeloid_cells	0.224932	0.332057	0.1	1000
SNAPC1	small nuclear RNA activating complex polypeptide 1 [Source:HGNC Symbol;Acc:HGNC:11134]	1.17678e-07	-0.407393	0.055	0.12	0.00293937	mg-TAM 2	All other cells	ND1_7.Neftel_2019_10x Myeloid_cells	0.124864	0.237948	0.1	1000
KCNMB1	potassium calcium-activated channel subfamily M regulatory beta subunit 1 [Source:HGNC Symbol;Acc:HGNC:6285]	1.20166e-07	0.546054	0.313	0.224	0.0030015	mg-TAM 2	All other cells	ND1_7.Neftel_2019_10x Myeloid_cells	0.863124	0.457871	0.1	1000
CH17-437K3.1		1.20252e-07	0.675148	0.106	0.042	0.00300367	mg-TAM 2	All other cells	ND1_7.Neftel_2019_10x Myeloid_cells	0.222785	0.0643239	0.1	1000
MPP1	membrane palmitoylated protein 1 [Source:HGNC Symbol;Acc:HGNC:7219]	1.2291e-07	-0.306274	0.271	0.405	0.00307004	mg-TAM 2	All other cells	ND1_7.Neftel_2019_10x Myeloid_cells	0.621923	0.880628	0.1	1000
ABRACL	ABRA C-terminal like [Source:HGNC Symbol;Acc:HGNC:21230]	1.26389e-07	-0.303998	0.247	0.389	0.00315695	mg-TAM 2	All other cells	ND1_7.Neftel_2019_10x Myeloid_cells	0.568177	0.805557	0.1	1000
MYADM	myeloid associated differentiation marker [Source:HGNC Symbol;Acc:HGNC:7544]	1.27394e-07	-0.513305	0.107	0.209	0.00318204	mg-TAM 2	All other cells	ND1_7.Neftel_2019_10x Myeloid_cells	0.241716	0.47094	0.1	1000
PLPP1	phospholipid phosphatase 1 [Source:HGNC Symbol;Acc:HGNC:9228]	1.28668e-07	0.577167	0.213	0.135	0.00321387	mg-TAM 2	All other cells	ND1_7.Neftel_2019_10x Myeloid_cells	0.484647	0.228272	0.1	1000
CH17-373J23.1		1.33458e-07	0.423837	0.314	0.232	0.00333352	mg-TAM 2	All other cells	ND1_7.Neftel_2019_10x Myeloid_cells	1.12519	0.701923	0.1	1000
HSPA5	heat shock protein family A (Hsp70) member 5 [Source:HGNC Symbol;Acc:HGNC:5238]	1.36313e-07	-0.660569	0.466	0.584	0.00340482	mg-TAM 2	All other cells	ND1_7.Neftel_2019_10x Myeloid_cells	1.71675	3.41704	0.1	1000
TUBB2A	tubulin beta 2A class IIa [Source:HGNC Symbol;Acc:HGNC:12412]	1.50846e-07	-0.420959	0.057	0.131	0.00376783	mg-TAM 2	All other cells	ND1_7.Neftel_2019_10x Myeloid_cells	0.110912	0.221308	0.1	1000
RCSD1	RCSD domain containing 1 [Source:HGNC Symbol;Acc:HGNC:28310]	1.6682e-07	0.391335	0.388	0.331	0.00416684	mg-TAM 2	All other cells	ND1_7.Neftel_2019_10x Myeloid_cells	1.0328	0.665947	0.1	1000
MT-ND6	mitochondrially encoded NADH:ubiquinone oxidoreductase core subunit 6 [Source:HGNC Symbol;Acc:HGNC:7462]	1.69298e-07	-0.529775	0.129	0.225	0.00422872	mg-TAM 2	All other cells	ND1_7.Neftel_2019_10x Myeloid_cells	0.369031	0.696672	0.1	1000
DOK1	docking protein 1 [Source:HGNC Symbol;Acc:HGNC:2990]	1.74872e-07	0.475858	0.342	0.274	0.00436795	mg-TAM 2	All other cells	ND1_7.Neftel_2019_10x Myeloid_cells	0.861915	0.497688	0.1	1000
MKNK2	MAPK interacting serine/threonine kinase 2 [Source:HGNC Symbol;Acc:HGNC:7111]	1.78623e-07	-0.375631	0.069	0.144	0.00446165	mg-TAM 2	All other cells	ND1_7.Neftel_2019_10x Myeloid_cells	0.147982	0.26104	0.1	1000
GBP2	guanylate binding protein 2 [Source:HGNC Symbol;Acc:HGNC:4183]	1.79471e-07	-0.430396	0.128	0.239	0.00448282	mg-TAM 2	All other cells	ND1_7.Neftel_2019_10x Myeloid_cells	0.288442	0.497372	0.1	1000
CPEB4	cytoplasmic polyadenylation element binding protein 4 [Source:HGNC Symbol;Acc:HGNC:21747]	1.81917e-07	-0.318521	0.115	0.205	0.00454393	mg-TAM 2	All other cells	ND1_7.Neftel_2019_10x Myeloid_cells	0.252591	0.384845	0.1	1000
SEPP1		1.8275e-07	-1.20537	0.136	0.231	0.00456473	mg-TAM 2	All other cells	ND1_7.Neftel_2019_10x Myeloid_cells	0.481701	1.84172	0.1	1000
HSP90B1	heat shock protein 90 beta family member 1 [Source:HGNC Symbol;Acc:HGNC:12028]	1.84781e-07	-0.419406	0.555	0.67	0.00461546	mg-TAM 2	All other cells	ND1_7.Neftel_2019_10x Myeloid_cells	2.273	3.50947	0.1	1000
EDEM1	ER degradation enhancing alpha-mannosidase like protein 1 [Source:HGNC Symbol;Acc:HGNC:18967]	1.85343e-07	-0.298854	0.049	0.107	0.00462949	mg-TAM 2	All other cells	ND1_7.Neftel_2019_10x Myeloid_cells	0.103747	0.174714	0.1	1000
AMPD2	adenosine monophosphate deaminase 2 [Source:HGNC Symbol;Acc:HGNC:469]	1.86341e-07	-0.299136	0.076	0.153	0.00465442	mg-TAM 2	All other cells	ND1_7.Neftel_2019_10x Myeloid_cells	0.174075	0.269643	0.1	1000
NHLRC3	NHL repeat containing 3 [Source:HGNC Symbol;Acc:HGNC:33751]	1.96895e-07	0.484447	0.277	0.216	0.00491804	mg-TAM 2	All other cells	ND1_7.Neftel_2019_10x Myeloid_cells	0.708057	0.397794	0.1	1000
NEK6	NIMA related kinase 6 [Source:HGNC Symbol;Acc:HGNC:7749]	2.02995e-07	-0.267879	0.126	0.234	0.00507041	mg-TAM 2	All other cells	ND1_7.Neftel_2019_10x Myeloid_cells	0.278587	0.394884	0.1	1000
RAB31	RAB31, member RAS oncogene family [Source:HGNC Symbol;Acc:HGNC:9771]	2.15632e-07	-0.286816	0.462	0.593	0.00538605	mg-TAM 2	All other cells	ND1_7.Neftel_2019_10x Myeloid_cells	1.32118	1.79326	0.1	1000
RASSF8-AS1	RASSF8 antisense RNA 1 [Source:HGNC Symbol;Acc:HGNC:48637]	2.45648e-07	0.593059	0.125	0.071	0.00613579	mg-TAM 2	All other cells	ND1_7.Neftel_2019_10x Myeloid_cells	0.287857	0.114343	0.1	1000
SERPINF1	serpin family F member 1 [Source:HGNC Symbol;Acc:HGNC:8824]	2.63618e-07	0.312004	0.643	0.553	0.00658465	mg-TAM 2	All other cells	ND1_7.Neftel_2019_10x Myeloid_cells	2.66516	1.92404	0.1	1000
SNX10	sorting nexin 10 [Source:HGNC Symbol;Acc:HGNC:14974]	2.66465e-07	-0.322545	0.175	0.292	0.00665576	mg-TAM 2	All other cells	ND1_7.Neftel_2019_10x Myeloid_cells	0.380674	0.563636	0.1	1000
BTG3	BTG anti-proliferation factor 3 [Source:HGNC Symbol;Acc:HGNC:1132]	2.98298e-07	-0.301553	0.108	0.199	0.00745089	mg-TAM 2	All other cells	ND1_7.Neftel_2019_10x Myeloid_cells	0.2455	0.367101	0.1	1000
XIST	X inactive specific transcript [Source:HGNC Symbol;Acc:HGNC:12810]	3.01371e-07	0.308901	0.377	0.322	0.00752764	mg-TAM 2	All other cells	ND1_7.Neftel_2019_10x Myeloid_cells	1.10171	0.782357	0.1	1000
ESD	esterase D [Source:HGNC Symbol;Acc:HGNC:3465]	3.05496e-07	0.271653	0.482	0.454	0.00763068	mg-TAM 2	All other cells	ND1_7.Neftel_2019_10x Myeloid_cells	1.32467	0.98577	0.1	1000
CYSLTR1	cysteinyl leukotriene receptor 1 [Source:HGNC Symbol;Acc:HGNC:17451]	3.06431e-07	0.574875	0.135	0.08	0.00765403	mg-TAM 2	All other cells	ND1_7.Neftel_2019_10x Myeloid_cells	0.310236	0.130871	0.1	1000
SKAP2	src kinase associated phosphoprotein 2 [Source:HGNC Symbol;Acc:HGNC:15687]	3.10626e-07	0.331026	0.543	0.502	0.00775882	mg-TAM 2	All other cells	ND1_7.Neftel_2019_10x Myeloid_cells	1.67378	1.17391	0.1	1000
IFIT3	interferon induced protein with tetratricopeptide repeats 3 [Source:HGNC Symbol;Acc:HGNC:5411]	3.20126e-07	-0.46394	0.107	0.164	0.00799611	mg-TAM 2	All other cells	ND1_7.Neftel_2019_10x Myeloid_cells	0.324092	0.574445	0.1	1000
TNRC6B	trinucleotide repeat containing adaptor 6B [Source:HGNC Symbol;Acc:HGNC:29190]	3.39624e-07	0.420619	0.305	0.253	0.00848313	mg-TAM 2	All other cells	ND1_7.Neftel_2019_10x Myeloid_cells	0.795105	0.487762	0.1	1000
UQCRQ	ubiquinol-cytochrome c reductase complex III subunit VII [Source:HGNC Symbol;Acc:HGNC:29594]	3.44529e-07	-0.276359	0.659	0.745	0.00860565	mg-TAM 2	All other cells	ND1_7.Neftel_2019_10x Myeloid_cells	2.35068	3.13078	0.1	1000
DDX17	DEAD-box helicase 17 [Source:HGNC Symbol;Acc:HGNC:2740]	3.46974e-07	0.385092	0.533	0.471	0.00866672	mg-TAM 2	All other cells	ND1_7.Neftel_2019_10x Myeloid_cells	1.6891	1.11728	0.1	1000
PCF11	PCF11 cleavage and polyadenylation factor subunit [Source:HGNC Symbol;Acc:HGNC:30097]	3.6922e-07	0.309056	0.258	0.226	0.00922239	mg-TAM 2	All other cells	ND1_7.Neftel_2019_10x Myeloid_cells	0.621508	0.429688	0.1	1000
RNF149	ring finger protein 149 [Source:HGNC Symbol;Acc:HGNC:23137]	3.91452e-07	-0.280606	0.365	0.519	0.00977768	mg-TAM 2	All other cells	ND1_7.Neftel_2019_10x Myeloid_cells	1.05892	1.43433	0.1	1000
MSR1	macrophage scavenger receptor 1 [Source:HGNC Symbol;Acc:HGNC:7376]	3.92428e-07	-0.327294	0.415	0.568	0.00980207	mg-TAM 2	All other cells	ND1_7.Neftel_2019_10x Myeloid_cells	1.35068	1.9124	0.1	1000
ABHD5	abhydrolase domain containing 5, lysophosphatidic acid acyltransferase [Source:HGNC Symbol;Acc:HGNC:21396]	3.99452e-07	-0.457729	0.059	0.124	0.00997752	mg-TAM 2	All other cells	ND1_7.Neftel_2019_10x Myeloid_cells	0.130521	0.264333	0.1	1000
CNIH4	cornichon family AMPA receptor auxiliary protein 4 [Source:HGNC Symbol;Acc:HGNC:25013]	4.16016e-07	-0.288385	0.184	0.292	0.0103913	mg-TAM 2	All other cells	ND1_7.Neftel_2019_10x Myeloid_cells	0.409004	0.579149	0.1	1000
DRAM1	DNA damage regulated autophagy modulator 1 [Source:HGNC Symbol;Acc:HGNC:25645]	4.20606e-07	-0.46115	0.031	0.101	0.0105059	mg-TAM 2	All other cells	ND1_7.Neftel_2019_10x Myeloid_cells	0.0661672	0.163524	0.1	1000
MANF	mesencephalic astrocyte derived neurotrophic factor [Source:HGNC Symbol;Acc:HGNC:15461]	4.3348e-07	-0.58374	0.221	0.357	0.0108275	mg-TAM 2	All other cells	ND1_7.Neftel_2019_10x Myeloid_cells	0.52792	1.02569	0.1	1000
PDIA4	protein disulfide isomerase family A member 4 [Source:HGNC Symbol;Acc:HGNC:30167]	4.46285e-07	-0.398508	0.207	0.321	0.0111473	mg-TAM 2	All other cells	ND1_7.Neftel_2019_10x Myeloid_cells	0.501769	0.796396	0.1	1000
SCAF11	SR-related CTD associated factor 11 [Source:HGNC Symbol;Acc:HGNC:10784]	4.7115e-07	0.299052	0.464	0.44	0.0117684	mg-TAM 2	All other cells	ND1_7.Neftel_2019_10x Myeloid_cells	1.32771	0.958675	0.1	1000
CYTH1	cytohesin 1 [Source:HGNC Symbol;Acc:HGNC:9501]	4.889e-07	-0.28164	0.124	0.221	0.0122117	mg-TAM 2	All other cells	ND1_7.Neftel_2019_10x Myeloid_cells	0.27889	0.402144	0.1	1000
ARL8B	ADP ribosylation factor like GTPase 8B [Source:HGNC Symbol;Acc:HGNC:25564]	5.06838e-07	-0.370984	0.109	0.227	0.0126598	mg-TAM 2	All other cells	ND1_7.Neftel_2019_10x Myeloid_cells	0.241694	0.395169	0.1	1000
NDRG2	NDRG family member 2 [Source:HGNC Symbol;Acc:HGNC:14460]	5.49146e-07	0.481246	0.39	0.302	0.0137166	mg-TAM 2	All other cells	ND1_7.Neftel_2019_10x Myeloid_cells	1.06504	0.62001	0.1	1000
OSTC	oligosaccharyltransferase complex non-catalytic subunit [Source:HGNC Symbol;Acc:HGNC:24448]	5.53044e-07	-0.276218	0.401	0.514	0.0138139	mg-TAM 2	All other cells	ND1_7.Neftel_2019_10x Myeloid_cells	1.03376	1.39444	0.1	1000
UBXN11	UBX domain protein 11 [Source:HGNC Symbol;Acc:HGNC:30600]	5.58776e-07	-0.348904	0.05	0.111	0.0139571	mg-TAM 2	All other cells	ND1_7.Neftel_2019_10x Myeloid_cells	0.103746	0.188813	0.1	1000
GLIPR1	GLI pathogenesis related 1 [Source:HGNC Symbol;Acc:HGNC:17001]	5.68597e-07	0.270261	0.612	0.556	0.0142024	mg-TAM 2	All other cells	ND1_7.Neftel_2019_10x Myeloid_cells	2.09474	1.57498	0.1	1000
PTK2B	protein tyrosine kinase 2 beta [Source:HGNC Symbol;Acc:HGNC:9612]	5.79765e-07	-0.366866	0.066	0.131	0.0144814	mg-TAM 2	All other cells	ND1_7.Neftel_2019_10x Myeloid_cells	0.134833	0.238913	0.1	1000
STRA13		5.88433e-07	-0.401727	0.193	0.316	0.0146979	mg-TAM 2	All other cells	ND1_7.Neftel_2019_10x Myeloid_cells	0.412622	0.666063	0.1	1000
NLRP3	NLR family pyrin domain containing 3 [Source:HGNC Symbol;Acc:HGNC:16400]	5.91486e-07	-0.390712	0.174	0.263	0.0147741	mg-TAM 2	All other cells	ND1_7.Neftel_2019_10x Myeloid_cells	0.434757	0.690389	0.1	1000
MGAT1	alpha-1,3-mannosyl-glycoprotein 2-beta-N-acetylglucosaminyltransferase [Source:HGNC Symbol;Acc:HGNC:7044]	5.93959e-07	-0.379557	0.43	0.573	0.0148359	mg-TAM 2	All other cells	ND1_7.Neftel_2019_10x Myeloid_cells	1.26204	1.89081	0.1	1000
FAM46A		6.16085e-07	-0.453362	0.057	0.107	0.0153886	mg-TAM 2	All other cells	ND1_7.Neftel_2019_10x Myeloid_cells	0.127134	0.257416	0.1	1000
FAM20C	FAM20C golgi associated secretory pathway kinase [Source:HGNC Symbol;Acc:HGNC:22140]	6.61508e-07	-0.372915	0.079	0.152	0.0165232	mg-TAM 2	All other cells	ND1_7.Neftel_2019_10x Myeloid_cells	0.166746	0.287304	0.1	1000
PRAM1	PML-RARA regulated adaptor molecule 1 [Source:HGNC Symbol;Acc:HGNC:30091]	6.90753e-07	0.450386	0.27	0.21	0.0172536	mg-TAM 2	All other cells	ND1_7.Neftel_2019_10x Myeloid_cells	0.629988	0.365281	0.1	1000
LCP1	lymphocyte cytosolic protein 1 [Source:HGNC Symbol;Acc:HGNC:6528]	6.93821e-07	-0.266603	0.289	0.415	0.0173303	mg-TAM 2	All other cells	ND1_7.Neftel_2019_10x Myeloid_cells	0.726816	0.979427	0.1	1000
AHCY	adenosylhomocysteinase [Source:HGNC Symbol;Acc:HGNC:343]	7.24202e-07	-0.314107	0.09	0.178	0.0180891	mg-TAM 2	All other cells	ND1_7.Neftel_2019_10x Myeloid_cells	0.184219	0.289107	0.1	1000
PRKAG2-AS1	PRKAG2 antisense RNA 1 [Source:HGNC Symbol;Acc:HGNC:40468]	7.34577e-07	-0.289005	0.163	0.265	0.0183483	mg-TAM 2	All other cells	ND1_7.Neftel_2019_10x Myeloid_cells	0.371405	0.529372	0.1	1000
PLXND1	plexin D1 [Source:HGNC Symbol;Acc:HGNC:9107]	7.50166e-07	-0.399838	0.083	0.175	0.0187377	mg-TAM 2	All other cells	ND1_7.Neftel_2019_10x Myeloid_cells	0.189605	0.33197	0.1	1000
LRRC59	leucine rich repeat containing 59 [Source:HGNC Symbol;Acc:HGNC:28817]	8.17195e-07	-0.280746	0.148	0.259	0.0204119	mg-TAM 2	All other cells	ND1_7.Neftel_2019_10x Myeloid_cells	0.312263	0.445885	0.1	1000
SSPN	sarcospan [Source:HGNC Symbol;Acc:HGNC:11322]	8.3815e-07	0.597096	0.216	0.142	0.0209353	mg-TAM 2	All other cells	ND1_7.Neftel_2019_10x Myeloid_cells	0.530996	0.247305	0.1	1000
DNAJB4	DnaJ heat shock protein family (Hsp40) member B4 [Source:HGNC Symbol;Acc:HGNC:14886]	8.77789e-07	-0.42596	0.051	0.111	0.0219254	mg-TAM 2	All other cells	ND1_7.Neftel_2019_10x Myeloid_cells	0.148445	0.280384	0.1	1000
SNCA	synuclein alpha [Source:HGNC Symbol;Acc:HGNC:11138]	9.46026e-07	0.279827	0.438	0.386	0.0236298	mg-TAM 2	All other cells	ND1_7.Neftel_2019_10x Myeloid_cells	1.16376	0.855294	0.1	1000
HCG22	HLA complex group 22 (gene/pseudogene) [Source:NCBI gene (formerly Entrezgene);Acc:285834]	9.53948e-07	0.792443	0.127	0.048	0.0238277	mg-TAM 2	All other cells	ND1_7.Neftel_2019_10x Myeloid_cells	0.307346	0.0844206	0.1	1000
UBE2D3	ubiquitin conjugating enzyme E2 D3 [Source:HGNC Symbol;Acc:HGNC:12476]	1.04232e-06	-0.283956	0.628	0.748	0.0260351	mg-TAM 2	All other cells	ND1_7.Neftel_2019_10x Myeloid_cells	2.14549	2.88285	0.1	1000
LINC01235	long intergenic non-protein coding RNA 1235 [Source:HGNC Symbol;Acc:HGNC:49769]	1.09745e-06	0.50818	0.205	0.126	0.027412	mg-TAM 2	All other cells	ND1_7.Neftel_2019_10x Myeloid_cells	0.607146	0.325411	0.1	1000
RANBP2	RAN binding protein 2 [Source:HGNC Symbol;Acc:HGNC:9848]	1.12424e-06	-0.302977	0.191	0.302	0.0280811	mg-TAM 2	All other cells	ND1_7.Neftel_2019_10x Myeloid_cells	0.447938	0.641844	0.1	1000
HSPB1	heat shock protein family B (small) member 1 [Source:HGNC Symbol;Acc:HGNC:5246]	1.14113e-06	-0.788116	0.604	0.699	0.0285032	mg-TAM 2	All other cells	ND1_7.Neftel_2019_10x Myeloid_cells	3.09532	6.9273	0.1	1000
LINC01268		1.15648e-06	0.558086	0.137	0.079	0.0288864	mg-TAM 2	All other cells	ND1_7.Neftel_2019_10x Myeloid_cells	0.317193	0.138761	0.1	1000
PIP5K1B	phosphatidylinositol-4-phosphate 5-kinase type 1 beta [Source:HGNC Symbol;Acc:HGNC:8995]	1.17293e-06	0.787754	0.175	0.08	0.0292974	mg-TAM 2	All other cells	ND1_7.Neftel_2019_10x Myeloid_cells	0.394031	0.124718	0.1	1000
LRRK1	leucine rich repeat kinase 1 [Source:HGNC Symbol;Acc:HGNC:18608]	1.19532e-06	0.519917	0.185	0.124	0.0298566	mg-TAM 2	All other cells	ND1_7.Neftel_2019_10x Myeloid_cells	0.435297	0.218272	0.1	1000
FAM110B	family with sequence similarity 110 member B [Source:HGNC Symbol;Acc:HGNC:28587]	1.19978e-06	-0.318616	0.045	0.105	0.0299682	mg-TAM 2	All other cells	ND1_7.Neftel_2019_10x Myeloid_cells	0.100963	0.176369	0.1	1000
SGPL1	sphingosine-1-phosphate lyase 1 [Source:HGNC Symbol;Acc:HGNC:10817]	1.2932e-06	-0.311608	0.068	0.138	0.0323015	mg-TAM 2	All other cells	ND1_7.Neftel_2019_10x Myeloid_cells	0.13753	0.224376	0.1	1000
RXRA	retinoid X receptor alpha [Source:HGNC Symbol;Acc:HGNC:10477]	1.30437e-06	-0.331287	0.067	0.13	0.0325807	mg-TAM 2	All other cells	ND1_7.Neftel_2019_10x Myeloid_cells	0.131599	0.222561	0.1	1000
MT-ND4L	mitochondrially encoded NADH:ubiquinone oxidoreductase core subunit 4L [Source:HGNC Symbol;Acc:HGNC:7460]	1.35883e-06	-0.544732	0.484	0.594	0.0339409	mg-TAM 2	All other cells	ND1_7.Neftel_2019_10x Myeloid_cells	5.55173	9.6444	0.1	1000
KYNU	kynureninase [Source:HGNC Symbol;Acc:HGNC:6469]	1.38183e-06	-0.348409	0.135	0.224	0.0345153	mg-TAM 2	All other cells	ND1_7.Neftel_2019_10x Myeloid_cells	0.279122	0.437144	0.1	1000
BNIP3L	BCL2 interacting protein 3 like [Source:HGNC Symbol;Acc:HGNC:1085]	1.38548e-06	-0.464053	0.391	0.525	0.0346064	mg-TAM 2	All other cells	ND1_7.Neftel_2019_10x Myeloid_cells	1.04207	1.71647	0.1	1000
NME1	NME/NM23 nucleoside diphosphate kinase 1 [Source:HGNC Symbol;Acc:HGNC:7849]	1.4488e-06	-0.334308	0.213	0.308	0.0361881	mg-TAM 2	All other cells	ND1_7.Neftel_2019_10x Myeloid_cells	0.505854	0.746363	0.1	1000
FNIP2	folliculin interacting protein 2 [Source:HGNC Symbol;Acc:HGNC:29280]	1.45298e-06	-0.394612	0.121	0.223	0.0362926	mg-TAM 2	All other cells	ND1_7.Neftel_2019_10x Myeloid_cells	0.268396	0.44663	0.1	1000
CXCL8	C-X-C motif chemokine ligand 8 [Source:HGNC Symbol;Acc:HGNC:6025]	1.49319e-06	-1.10773	0.32	0.4	0.0372969	mg-TAM 2	All other cells	ND1_7.Neftel_2019_10x Myeloid_cells	2.5624	7.96033	0.1	1000
COL9A2	collagen type IX alpha 2 chain [Source:HGNC Symbol;Acc:HGNC:2218]	1.50034e-06	0.459201	0.106	0.072	0.0374755	mg-TAM 2	All other cells	ND1_7.Neftel_2019_10x Myeloid_cells	0.239897	0.114743	0.1	1000
TNFRSF1A	TNF receptor superfamily member 1A [Source:HGNC Symbol;Acc:HGNC:11916]	1.5032e-06	0.278838	0.57	0.544	0.0375469	mg-TAM 2	All other cells	ND1_7.Neftel_2019_10x Myeloid_cells	1.8257	1.3571	0.1	1000
PLEKHO1	pleckstrin homology domain containing O1 [Source:HGNC Symbol;Acc:HGNC:24310]	1.63568e-06	0.390279	0.467	0.393	0.0408559	mg-TAM 2	All other cells	ND1_7.Neftel_2019_10x Myeloid_cells	1.35559	0.885241	0.1	1000
OAS3	2'-5'-oligoadenylate synthetase 3 [Source:HGNC Symbol;Acc:HGNC:8088]	1.78475e-06	-0.286312	0.051	0.104	0.0445794	mg-TAM 2	All other cells	ND1_7.Neftel_2019_10x Myeloid_cells	0.112339	0.182731	0.1	1000
SNHG12	small nucleolar RNA host gene 12 [Source:HGNC Symbol;Acc:HGNC:30062]	2.23616e-06	-0.822612	0.152	0.258	0.0558549	mg-TAM 2	All other cells	ND1_7.Neftel_2019_10x Myeloid_cells	0.387997	1.01089	0.1	1000
FHL3	four and a half LIM domains 3 [Source:HGNC Symbol;Acc:HGNC:3704]	2.2397e-06	0.261018	0.263	0.256	0.0559432	mg-TAM 2	All other cells	ND1_7.Neftel_2019_10x Myeloid_cells	0.604482	0.442639	0.1	1000
IER5	immediate early response 5 [Source:HGNC Symbol;Acc:HGNC:5393]	2.41927e-06	-0.623866	0.204	0.323	0.0604286	mg-TAM 2	All other cells	ND1_7.Neftel_2019_10x Myeloid_cells	0.521507	1.05981	0.1	1000
SPATA13	spermatogenesis associated 13 [Source:HGNC Symbol;Acc:HGNC:23222]	2.59828e-06	0.508961	0.309	0.231	0.0648998	mg-TAM 2	All other cells	ND1_7.Neftel_2019_10x Myeloid_cells	0.797838	0.439708	0.1	1000
HLA-DQB2	major histocompatibility complex, class II, DQ beta 2 [Source:HGNC Symbol;Acc:HGNC:4945]	2.69682e-06	-0.55471	0.074	0.128	0.0673612	mg-TAM 2	All other cells	ND1_7.Neftel_2019_10x Myeloid_cells	0.188671	0.402702	0.1	1000
TRIM38	tripartite motif containing 38 [Source:HGNC Symbol;Acc:HGNC:10059]	2.80322e-06	0.447803	0.316	0.262	0.0700188	mg-TAM 2	All other cells	ND1_7.Neftel_2019_10x Myeloid_cells	0.803575	0.477412	0.1	1000
OCIAD2	OCIA domain containing 2 [Source:HGNC Symbol;Acc:HGNC:28685]	2.82029e-06	-0.391325	0.05	0.106	0.0704453	mg-TAM 2	All other cells	ND1_7.Neftel_2019_10x Myeloid_cells	0.106012	0.204679	0.1	1000
AOAH	acyloxyacyl hydrolase [Source:HGNC Symbol;Acc:HGNC:548]	2.94311e-06	0.361571	0.401	0.339	0.073513	mg-TAM 2	All other cells	ND1_7.Neftel_2019_10x Myeloid_cells	1.08505	0.725485	0.1	1000
FOXN3	forkhead box N3 [Source:HGNC Symbol;Acc:HGNC:1928]	3.08615e-06	0.315853	0.406	0.373	0.077086	mg-TAM 2	All other cells	ND1_7.Neftel_2019_10x Myeloid_cells	1.10572	0.77917	0.1	1000
GBE1	1,4-alpha-glucan branching enzyme 1 [Source:HGNC Symbol;Acc:HGNC:4180]	3.20027e-06	-0.336408	0.084	0.138	0.0799363	mg-TAM 2	All other cells	ND1_7.Neftel_2019_10x Myeloid_cells	0.17747	0.288433	0.1	1000
SLC25A19	solute carrier family 25 member 19 [Source:HGNC Symbol;Acc:HGNC:14409]	3.30082e-06	-0.298224	0.177	0.286	0.0824478	mg-TAM 2	All other cells	ND1_7.Neftel_2019_10x Myeloid_cells	0.425001	0.60742	0.1	1000
VAMP2	vesicle associated membrane protein 2 [Source:HGNC Symbol;Acc:HGNC:12643]	3.33014e-06	0.40387	0.389	0.337	0.0831801	mg-TAM 2	All other cells	ND1_7.Neftel_2019_10x Myeloid_cells	1.06715	0.679339	0.1	1000
GPR183	G protein-coupled receptor 183 [Source:HGNC Symbol;Acc:HGNC:3128]	3.35924e-06	-0.501675	0.552	0.619	0.083907	mg-TAM 2	All other cells	ND1_7.Neftel_2019_10x Myeloid_cells	2.69642	4.51824	0.1	1000
RAB13	RAB13, member RAS oncogene family [Source:HGNC Symbol;Acc:HGNC:9762]	3.47469e-06	-0.310138	0.267	0.363	0.0867908	mg-TAM 2	All other cells	ND1_7.Neftel_2019_10x Myeloid_cells	0.632923	0.899423	0.1	1000
ADGRE2	adhesion G protein-coupled receptor E2 [Source:HGNC Symbol;Acc:HGNC:3337]	3.67998e-06	-0.334893	0.077	0.153	0.0919184	mg-TAM 2	All other cells	ND1_7.Neftel_2019_10x Myeloid_cells	0.182503	0.294881	0.1	1000
ZFHX3	zinc finger homeobox 3 [Source:HGNC Symbol;Acc:HGNC:777]	3.69495e-06	0.413182	0.414	0.349	0.0922924	mg-TAM 2	All other cells	ND1_7.Neftel_2019_10x Myeloid_cells	1.15315	0.729008	0.1	1000
RP11-386I14.4		3.93199e-06	0.544624	0.319	0.246	0.0982133	mg-TAM 2	All other cells	ND1_7.Neftel_2019_10x Myeloid_cells	1.10688	0.60006	0.1	1000
MIDN	midnolin [Source:HGNC Symbol;Acc:HGNC:16298]	3.95699e-06	-0.3268	0.16	0.253	0.0988377	mg-TAM 2	All other cells	ND1_7.Neftel_2019_10x Myeloid_cells	0.362315	0.541011	0.1	1000
TMEM106C	transmembrane protein 106C [Source:HGNC Symbol;Acc:HGNC:28775]	4.06729e-06	-0.335686	0.068	0.121	0.101593	mg-TAM 2	All other cells	ND1_7.Neftel_2019_10x Myeloid_cells	0.13624	0.230476	0.1	1000
EGR2	early growth response 2 [Source:HGNC Symbol;Acc:HGNC:3239]	4.07521e-06	-0.430483	0.217	0.307	0.10179	mg-TAM 2	All other cells	ND1_7.Neftel_2019_10x Myeloid_cells	0.843982	1.35185	0.1	1000
FAM53C	family with sequence similarity 53 member C [Source:HGNC Symbol;Acc:HGNC:1336]	4.12047e-06	-0.448895	0.082	0.176	0.102921	mg-TAM 2	All other cells	ND1_7.Neftel_2019_10x Myeloid_cells	0.185178	0.346754	0.1	1000
AP1S2	adaptor related protein complex 1 subunit sigma 2 [Source:HGNC Symbol;Acc:HGNC:560]	4.13525e-06	-0.368042	0.29	0.421	0.10329	mg-TAM 2	All other cells	ND1_7.Neftel_2019_10x Myeloid_cells	0.691481	1.04361	0.1	1000
DMXL2	Dmx like 2 [Source:HGNC Symbol;Acc:HGNC:2938]	4.33396e-06	-0.344195	0.063	0.135	0.108254	mg-TAM 2	All other cells	ND1_7.Neftel_2019_10x Myeloid_cells	0.136274	0.233349	0.1	1000
HHEX	hematopoietically expressed homeobox [Source:HGNC Symbol;Acc:HGNC:4901]	4.36142e-06	0.499458	0.248	0.185	0.10894	mg-TAM 2	All other cells	ND1_7.Neftel_2019_10x Myeloid_cells	0.593919	0.321111	0.1	1000
TMEM173		4.52099e-06	0.415238	0.383	0.321	0.112925	mg-TAM 2	All other cells	ND1_7.Neftel_2019_10x Myeloid_cells	1.05668	0.663624	0.1	1000
SLC25A37	solute carrier family 25 member 37 [Source:HGNC Symbol;Acc:HGNC:29786]	4.62221e-06	0.288802	0.434	0.373	0.115454	mg-TAM 2	All other cells	ND1_7.Neftel_2019_10x Myeloid_cells	1.32967	0.971053	0.1	1000
BCAS2	BCAS2 pre-mRNA processing factor [Source:HGNC Symbol;Acc:HGNC:975]	4.68502e-06	-0.453308	0.213	0.331	0.117022	mg-TAM 2	All other cells	ND1_7.Neftel_2019_10x Myeloid_cells	0.510088	0.859979	0.1	1000
OAS1	2'-5'-oligoadenylate synthetase 1 [Source:HGNC Symbol;Acc:HGNC:8086]	4.71666e-06	0.358946	0.387	0.308	0.117813	mg-TAM 2	All other cells	ND1_7.Neftel_2019_10x Myeloid_cells	1.09036	0.731361	0.1	1000
PKN2	protein kinase N2 [Source:HGNC Symbol;Acc:HGNC:9406]	4.7712e-06	0.505942	0.256	0.197	0.119175	mg-TAM 2	All other cells	ND1_7.Neftel_2019_10x Myeloid_cells	0.657279	0.356592	0.1	1000
PSME2	proteasome activator subunit 2 [Source:HGNC Symbol;Acc:HGNC:9569]	4.80016e-06	-0.263271	0.555	0.623	0.119898	mg-TAM 2	All other cells	ND1_7.Neftel_2019_10x Myeloid_cells	1.80151	2.37421	0.1	1000
PALD1	phosphatase domain containing paladin 1 [Source:HGNC Symbol;Acc:HGNC:23530]	4.91768e-06	0.351387	0.352	0.297	0.122834	mg-TAM 2	All other cells	ND1_7.Neftel_2019_10x Myeloid_cells	0.891782	0.597928	0.1	1000
MLXIPL	MLX interacting protein like [Source:HGNC Symbol;Acc:HGNC:12744]	5.29324e-06	0.521122	0.201	0.138	0.132214	mg-TAM 2	All other cells	ND1_7.Neftel_2019_10x Myeloid_cells	0.476682	0.242465	0.1	1000
SDF2L1	stromal cell derived factor 2 like 1 [Source:HGNC Symbol;Acc:HGNC:10676]	5.56734e-06	-0.409656	0.3	0.43	0.139061	mg-TAM 2	All other cells	ND1_7.Neftel_2019_10x Myeloid_cells	0.774716	1.21758	0.1	1000
LEPROT	leptin receptor overlapping transcript [Source:HGNC Symbol;Acc:HGNC:29477]	5.57599e-06	0.32802	0.435	0.399	0.139277	mg-TAM 2	All other cells	ND1_7.Neftel_2019_10x Myeloid_cells	1.17928	0.821531	0.1	1000
CALR	calreticulin [Source:HGNC Symbol;Acc:HGNC:1455]	5.63541e-06	-0.316012	0.65	0.723	0.140761	mg-TAM 2	All other cells	ND1_7.Neftel_2019_10x Myeloid_cells	2.82352	3.91004	0.1	1000
CACNB4	calcium voltage-gated channel auxiliary subunit beta 4 [Source:HGNC Symbol;Acc:HGNC:1404]	5.82383e-06	0.661943	0.157	0.082	0.145468	mg-TAM 2	All other cells	ND1_7.Neftel_2019_10x Myeloid_cells	0.355363	0.134898	0.1	1000
SCD	stearoyl-CoA desaturase [Source:HGNC Symbol;Acc:HGNC:10571]	5.86512e-06	-0.389823	0.093	0.164	0.146499	mg-TAM 2	All other cells	ND1_7.Neftel_2019_10x Myeloid_cells	0.205734	0.351484	0.1	1000
CCND1	cyclin D1 [Source:HGNC Symbol;Acc:HGNC:1582]	5.86783e-06	0.331363	0.393	0.351	0.146567	mg-TAM 2	All other cells	ND1_7.Neftel_2019_10x Myeloid_cells	1.18342	0.821427	0.1	1000
TNF	tumor necrosis factor [Source:HGNC Symbol;Acc:HGNC:11892]	6.2029e-06	-0.546942	0.131	0.211	0.154936	mg-TAM 2	All other cells	ND1_7.Neftel_2019_10x Myeloid_cells	0.602341	1.11362	0.1	1000
HLA-DQA1	major histocompatibility complex, class II, DQ alpha 1 [Source:HGNC Symbol;Acc:HGNC:4942]	6.21776e-06	-0.446158	0.488	0.593	0.155307	mg-TAM 2	All other cells	ND1_7.Neftel_2019_10x Myeloid_cells	3.09422	4.89032	0.1	1000
CITED2	Cbp/p300 interacting transactivator with Glu/Asp rich carboxy-terminal domain 2 [Source:HGNC Symbol;Acc:HGNC:1987]	6.54407e-06	-0.404371	0.292	0.381	0.163458	mg-TAM 2	All other cells	ND1_7.Neftel_2019_10x Myeloid_cells	1.28484	1.97499	0.1	1000
UBA7	ubiquitin like modifier activating enzyme 7 [Source:HGNC Symbol;Acc:HGNC:12471]	6.64179e-06	0.476838	0.26	0.202	0.165899	mg-TAM 2	All other cells	ND1_7.Neftel_2019_10x Myeloid_cells	0.639496	0.359037	0.1	1000
TOMM5	translocase of outer mitochondrial membrane 5 [Source:HGNC Symbol;Acc:HGNC:31369]	7.08177e-06	-0.323665	0.128	0.238	0.176888	mg-TAM 2	All other cells	ND1_7.Neftel_2019_10x Myeloid_cells	0.275641	0.419205	0.1	1000
MPEG1	macrophage expressed 1 [Source:HGNC Symbol;Acc:HGNC:29619]	7.08363e-06	-0.311747	0.069	0.13	0.176935	mg-TAM 2	All other cells	ND1_7.Neftel_2019_10x Myeloid_cells	0.154335	0.247374	0.1	1000
NTAN1	N-terminal asparagine amidase [Source:HGNC Symbol;Acc:HGNC:29909]	7.08866e-06	-0.283251	0.113	0.204	0.177061	mg-TAM 2	All other cells	ND1_7.Neftel_2019_10x Myeloid_cells	0.223935	0.330004	0.1	1000
CYTIP	cytohesin 1 interacting protein [Source:HGNC Symbol;Acc:HGNC:9506]	7.15758e-06	-0.391762	0.162	0.262	0.178782	mg-TAM 2	All other cells	ND1_7.Neftel_2019_10x Myeloid_cells	0.371148	0.597104	0.1	1000
RNF166	ring finger protein 166 [Source:HGNC Symbol;Acc:HGNC:28856]	7.20007e-06	0.297688	0.33	0.309	0.179843	mg-TAM 2	All other cells	ND1_7.Neftel_2019_10x Myeloid_cells	0.799741	0.568088	0.1	1000
AKT1	AKT serine/threonine kinase 1 [Source:HGNC Symbol;Acc:HGNC:391]	7.34848e-06	-0.277814	0.057	0.112	0.18355	mg-TAM 2	All other cells	ND1_7.Neftel_2019_10x Myeloid_cells	0.112889	0.181064	0.1	1000
FXYD5	FXYD domain containing ion transport regulator 5 [Source:HGNC Symbol;Acc:HGNC:4029]	7.4185e-06	-0.267979	0.67	0.769	0.185299	mg-TAM 2	All other cells	ND1_7.Neftel_2019_10x Myeloid_cells	2.86341	3.77412	0.1	1000
NOP16	NOP16 nucleolar protein [Source:HGNC Symbol;Acc:HGNC:26934]	7.6613e-06	-0.262326	0.055	0.115	0.191364	mg-TAM 2	All other cells	ND1_7.Neftel_2019_10x Myeloid_cells	0.11236	0.176057	0.1	1000
HYOU1	hypoxia up-regulated 1 [Source:HGNC Symbol;Acc:HGNC:16931]	8.20448e-06	-0.505664	0.036	0.107	0.204932	mg-TAM 2	All other cells	ND1_7.Neftel_2019_10x Myeloid_cells	0.0760141	0.191847	0.1	1000
IPCEF1	interaction protein for cytohesin exchange factors 1 [Source:HGNC Symbol;Acc:HGNC:21204]	8.27964e-06	0.620862	0.169	0.094	0.206809	mg-TAM 2	All other cells	ND1_7.Neftel_2019_10x Myeloid_cells	0.410703	0.174493	0.1	1000
CMC2	C-X9-C motif containing 2 [Source:HGNC Symbol;Acc:HGNC:24447]	8.46136e-06	-0.282191	0.127	0.221	0.211348	mg-TAM 2	All other cells	ND1_7.Neftel_2019_10x Myeloid_cells	0.265469	0.384623	0.1	1000
PRKX	protein kinase X-linked [Source:HGNC Symbol;Acc:HGNC:9441]	9.41813e-06	0.453017	0.24	0.185	0.235246	mg-TAM 2	All other cells	ND1_7.Neftel_2019_10x Myeloid_cells	0.562919	0.321422	0.1	1000
PSRC1	proline and serine rich coiled-coil 1 [Source:HGNC Symbol;Acc:HGNC:24472]	9.44736e-06	0.585224	0.177	0.113	0.235976	mg-TAM 2	All other cells	ND1_7.Neftel_2019_10x Myeloid_cells	0.408929	0.183464	0.1	1000
PAG1	phosphoprotein membrane anchor with glycosphingolipid microdomains 1 [Source:HGNC Symbol;Acc:HGNC:30043]	9.68279e-06	0.3571	0.304	0.262	0.241857	mg-TAM 2	All other cells	ND1_7.Neftel_2019_10x Myeloid_cells	0.762937	0.503799	0.1	1000
RP6-91H8.3		9.73388e-06	-0.260847	0.091	0.153	0.243133	mg-TAM 2	All other cells	ND1_7.Neftel_2019_10x Myeloid_cells	0.262245	0.370204	0.1	1000
SPTLC2	serine palmitoyltransferase long chain base subunit 2 [Source:HGNC Symbol;Acc:HGNC:11278]	9.76278e-06	0.342496	0.417	0.367	0.243855	mg-TAM 2	All other cells	ND1_7.Neftel_2019_10x Myeloid_cells	1.1538	0.790192	0.1	1000
PNN	pinin, desmosome associated protein [Source:HGNC Symbol;Acc:HGNC:9162]	9.87436e-06	0.40091	0.337	0.294	0.246642	mg-TAM 2	All other cells	ND1_7.Neftel_2019_10x Myeloid_cells	0.867807	0.54815	0.1	1000
FKBP2	FKBP prolyl isomerase 2 [Source:HGNC Symbol;Acc:HGNC:3718]	1.05295e-05	-0.276351	0.443	0.57	0.263005	mg-TAM 2	All other cells	ND1_7.Neftel_2019_10x Myeloid_cells	1.27375	1.71103	0.1	1000
SMIM3	small integral membrane protein 3 [Source:HGNC Symbol;Acc:HGNC:30248]	1.06549e-05	-0.487906	0.094	0.187	0.266138	mg-TAM 2	All other cells	ND1_7.Neftel_2019_10x Myeloid_cells	0.229158	0.436166	0.1	1000
DST	dystonin [Source:HGNC Symbol;Acc:HGNC:1090]	1.1353e-05	0.329693	0.352	0.321	0.283574	mg-TAM 2	All other cells	ND1_7.Neftel_2019_10x Myeloid_cells	0.948101	0.653737	0.1	1000
SEPHS2	selenophosphate synthetase 2 [Source:HGNC Symbol;Acc:HGNC:19686]	1.16695e-05	-0.36979	0.041	0.107	0.291481	mg-TAM 2	All other cells	ND1_7.Neftel_2019_10x Myeloid_cells	0.0897601	0.174665	0.1	1000
TNFRSF14	TNF receptor superfamily member 14 [Source:HGNC Symbol;Acc:HGNC:11912]	1.27205e-05	-0.376273	0.13	0.234	0.317732	mg-TAM 2	All other cells	ND1_7.Neftel_2019_10x Myeloid_cells	0.279536	0.452925	0.1	1000
H2AFZ		1.32014e-05	-0.541833	0.568	0.671	0.329745	mg-TAM 2	All other cells	ND1_7.Neftel_2019_10x Myeloid_cells	1.78531	3.14114	0.1	1000
MAML1	mastermind like transcriptional coactivator 1 [Source:HGNC Symbol;Acc:HGNC:13632]	1.32249e-05	0.570378	0.218	0.15	0.330331	mg-TAM 2	All other cells	ND1_7.Neftel_2019_10x Myeloid_cells	0.532925	0.2578	0.1	1000
HIST2H2BE		1.41454e-05	0.60019	0.174	0.113	0.353325	mg-TAM 2	All other cells	ND1_7.Neftel_2019_10x Myeloid_cells	0.487601	0.222421	0.1	1000
SFXN3	sideroflexin 3 [Source:HGNC Symbol;Acc:HGNC:16087]	1.41893e-05	-0.266476	0.058	0.115	0.35442	mg-TAM 2	All other cells	ND1_7.Neftel_2019_10x Myeloid_cells	0.113736	0.179002	0.1	1000
LMBRD1	LMBR1 domain containing 1 [Source:HGNC Symbol;Acc:HGNC:23038]	1.4984e-05	0.277044	0.297	0.278	0.374271	mg-TAM 2	All other cells	ND1_7.Neftel_2019_10x Myeloid_cells	0.726436	0.526456	0.1	1000
PNP	purine nucleoside phosphorylase [Source:HGNC Symbol;Acc:HGNC:7892]	1.51894e-05	-0.251699	0.114	0.189	0.379402	mg-TAM 2	All other cells	ND1_7.Neftel_2019_10x Myeloid_cells	0.246437	0.345591	0.1	1000
SCARB2	scavenger receptor class B member 2 [Source:HGNC Symbol;Acc:HGNC:1665]	1.53709e-05	-0.251891	0.227	0.36	0.383934	mg-TAM 2	All other cells	ND1_7.Neftel_2019_10x Myeloid_cells	0.552983	0.740033	0.1	1000
TNFAIP8	TNF alpha induced protein 8 [Source:HGNC Symbol;Acc:HGNC:17260]	1.58612e-05	-0.306361	0.076	0.139	0.396181	mg-TAM 2	All other cells	ND1_7.Neftel_2019_10x Myeloid_cells	0.155591	0.247213	0.1	1000
PABPC4	poly(A) binding protein cytoplasmic 4 [Source:HGNC Symbol;Acc:HGNC:8557]	1.64351e-05	0.263547	0.54	0.499	0.410515	mg-TAM 2	All other cells	ND1_7.Neftel_2019_10x Myeloid_cells	1.61732	1.21945	0.1	1000
CTSB	cathepsin B [Source:HGNC Symbol;Acc:HGNC:2527]	1.71794e-05	-0.280064	0.979	0.957	0.429107	mg-TAM 2	All other cells	ND1_7.Neftel_2019_10x Myeloid_cells	11.3434	15.042	0.1	1000
LCP2	lymphocyte cytosolic protein 2 [Source:HGNC Symbol;Acc:HGNC:6529]	1.74306e-05	-0.309561	0.279	0.407	0.435381	mg-TAM 2	All other cells	ND1_7.Neftel_2019_10x Myeloid_cells	0.721836	1.02002	0.1	1000
APOBEC3G	apolipoprotein B mRNA editing enzyme catalytic subunit 3G [Source:HGNC Symbol;Acc:HGNC:17357]	1.79284e-05	0.480079	0.286	0.224	0.447817	mg-TAM 2	All other cells	ND1_7.Neftel_2019_10x Myeloid_cells	0.684633	0.385479	0.1	1000
JARID2	jumonji and AT-rich interaction domain containing 2 [Source:HGNC Symbol;Acc:HGNC:6196]	1.83725e-05	-0.296574	0.061	0.117	0.458908	mg-TAM 2	All other cells	ND1_7.Neftel_2019_10x Myeloid_cells	0.124505	0.202014	0.1	1000
BOLA3	bolA family member 3 [Source:HGNC Symbol;Acc:HGNC:24415]	1.86059e-05	-0.277401	0.16	0.266	0.464738	mg-TAM 2	All other cells	ND1_7.Neftel_2019_10x Myeloid_cells	0.339018	0.47937	0.1	1000
TMEM176B	transmembrane protein 176B [Source:HGNC Symbol;Acc:HGNC:29596]	1.98074e-05	-0.321188	0.507	0.585	0.49475	mg-TAM 2	All other cells	ND1_7.Neftel_2019_10x Myeloid_cells	2.75924	3.84222	0.1	1000
CXCR4	C-X-C motif chemokine receptor 4 [Source:HGNC Symbol;Acc:HGNC:2561]	2.0091e-05	-0.406855	0.476	0.609	0.501833	mg-TAM 2	All other cells	ND1_7.Neftel_2019_10x Myeloid_cells	3.88398	5.88428	0.1	1000
RAB32	RAB32, member RAS oncogene family [Source:HGNC Symbol;Acc:HGNC:9772]	2.11096e-05	0.342709	0.438	0.402	0.527275	mg-TAM 2	All other cells	ND1_7.Neftel_2019_10x Myeloid_cells	1.22314	0.839223	0.1	1000
LARP7	La ribonucleoprotein 7, transcriptional regulator [Source:HGNC Symbol;Acc:HGNC:24912]	2.19758e-05	0.324177	0.329	0.299	0.548911	mg-TAM 2	All other cells	ND1_7.Neftel_2019_10x Myeloid_cells	0.825742	0.569425	0.1	1000
CFLAR	CASP8 and FADD like apoptosis regulator [Source:HGNC Symbol;Acc:HGNC:1876]	2.56681e-05	-0.250626	0.256	0.37	0.641138	mg-TAM 2	All other cells	ND1_7.Neftel_2019_10x Myeloid_cells	0.6179	0.822379	0.1	1000
ZMAT3	zinc finger matrin-type 3 [Source:HGNC Symbol;Acc:HGNC:29983]	2.63006e-05	0.515511	0.276	0.215	0.656936	mg-TAM 2	All other cells	ND1_7.Neftel_2019_10x Myeloid_cells	0.734827	0.398555	0.1	1000
PDE4A	phosphodiesterase 4A [Source:HGNC Symbol;Acc:HGNC:8780]	2.63497e-05	-0.28784	0.062	0.121	0.658163	mg-TAM 2	All other cells	ND1_7.Neftel_2019_10x Myeloid_cells	0.124031	0.198755	0.1	1000
PAICS	phosphoribosylaminoimidazole carboxylase and phosphoribosylaminoimidazolesuccinocarboxamide synthase [Source:HGNC Symbol;Acc:HGNC:8587]	2.71831e-05	-0.306147	0.057	0.126	0.67898	mg-TAM 2	All other cells	ND1_7.Neftel_2019_10x Myeloid_cells	0.117646	0.195603	0.1	1000
LSM8	LSM8 homolog, U6 small nuclear RNA associated [Source:HGNC Symbol;Acc:HGNC:20471]	2.86661e-05	0.315567	0.407	0.364	0.716021	mg-TAM 2	All other cells	ND1_7.Neftel_2019_10x Myeloid_cells	1.07463	0.756749	0.1	1000
DYNC1I2	dynein cytoplasmic 1 intermediate chain 2 [Source:HGNC Symbol;Acc:HGNC:2964]	2.88205e-05	0.342594	0.362	0.334	0.719878	mg-TAM 2	All other cells	ND1_7.Neftel_2019_10x Myeloid_cells	0.943885	0.641082	0.1	1000
RTFDC1		2.95965e-05	0.259301	0.499	0.474	0.739261	mg-TAM 2	All other cells	ND1_7.Neftel_2019_10x Myeloid_cells	1.37412	1.03742	0.1	1000
MORF4L2	mortality factor 4 like 2 [Source:HGNC Symbol;Acc:HGNC:16849]	3.08559e-05	-0.283008	0.23	0.353	0.770718	mg-TAM 2	All other cells	ND1_7.Neftel_2019_10x Myeloid_cells	0.547574	0.759407	0.1	1000
CHMP4A	charged multivesicular body protein 4A [Source:HGNC Symbol;Acc:HGNC:20274]	3.16043e-05	0.262545	0.443	0.4	0.789412	mg-TAM 2	All other cells	ND1_7.Neftel_2019_10x Myeloid_cells	1.26244	0.947839	0.1	1000
HSPH1	heat shock protein family H (Hsp110) member 1 [Source:HGNC Symbol;Acc:HGNC:16969]	3.19148e-05	-0.777978	0.199	0.327	0.797168	mg-TAM 2	All other cells	ND1_7.Neftel_2019_10x Myeloid_cells	0.716416	1.67739	0.1	1000
NCK1-AS1		3.21911e-05	0.454405	0.16	0.115	0.80407	mg-TAM 2	All other cells	ND1_7.Neftel_2019_10x Myeloid_cells	0.350124	0.18575	0.1	1000
UTRN	utrophin [Source:HGNC Symbol;Acc:HGNC:12635]	3.31516e-05	-0.27421	0.08	0.148	0.828061	mg-TAM 2	All other cells	ND1_7.Neftel_2019_10x Myeloid_cells	0.175588	0.262533	0.1	1000
HS3ST1	heparan sulfate-glucosamine 3-sulfotransferase 1 [Source:HGNC Symbol;Acc:HGNC:5194]	3.48334e-05	-0.268273	0.086	0.149	0.870069	mg-TAM 2	All other cells	ND1_7.Neftel_2019_10x Myeloid_cells	0.195215	0.286054	0.1	1000
CD55	CD55 molecule (Cromer blood group) [Source:HGNC Symbol;Acc:HGNC:2665]	3.67545e-05	-0.39947	0.135	0.236	0.918054	mg-TAM 2	All other cells	ND1_7.Neftel_2019_10x Myeloid_cells	0.302893	0.500727	0.1	1000
MPHOSPH8	M-phase phosphoprotein 8 [Source:HGNC Symbol;Acc:HGNC:29810]	3.74965e-05	0.407762	0.334	0.292	0.936588	mg-TAM 2	All other cells	ND1_7.Neftel_2019_10x Myeloid_cells	0.891335	0.559374	0.1	1000
RP11-834C11.4		3.84808e-05	0.514381	0.23	0.159	0.961174	mg-TAM 2	All other cells	ND1_7.Neftel_2019_10x Myeloid_cells	0.522325	0.27207	0.1	1000
PRNP	prion protein [Source:HGNC Symbol;Acc:HGNC:9449]	3.8647e-05	-0.287517	0.214	0.335	0.965326	mg-TAM 2	All other cells	ND1_7.Neftel_2019_10x Myeloid_cells	0.502031	0.702576	0.1	1000
APPL2	adaptor protein, phosphotyrosine interacting with PH domain and leucine zipper 2 [Source:HGNC Symbol;Acc:HGNC:18242]	4.2523e-05	0.442688	0.224	0.176	1	mg-TAM 2	All other cells	ND1_7.Neftel_2019_10x Myeloid_cells	0.518965	0.297566	0.1	1000
ARHGAP25	Rho GTPase activating protein 25 [Source:HGNC Symbol;Acc:HGNC:28951]	4.32285e-05	0.492926	0.212	0.159	1	mg-TAM 2	All other cells	ND1_7.Neftel_2019_10x Myeloid_cells	0.496257	0.264215	0.1	1000
CCL4	C-C motif chemokine ligand 4 [Source:HGNC Symbol;Acc:HGNC:10630]	4.54154e-05	-0.771094	0.68	0.674	1	mg-TAM 2	All other cells	ND1_7.Neftel_2019_10x Myeloid_cells	17.2908	37.5011	0.1	1000
PTGS1	prostaglandin-endoperoxide synthase 1 [Source:HGNC Symbol;Acc:HGNC:9604]	4.62109e-05	0.338939	0.403	0.37	1	mg-TAM 2	All other cells	ND1_7.Neftel_2019_10x Myeloid_cells	1.09256	0.74973	0.1	1000
USP36	ubiquitin specific peptidase 36 [Source:HGNC Symbol;Acc:HGNC:20062]	4.70689e-05	-0.338228	0.069	0.14	1	mg-TAM 2	All other cells	ND1_7.Neftel_2019_10x Myeloid_cells	0.14839	0.248357	0.1	1000
RGL2	ral guanine nucleotide dissociation stimulator like 2 [Source:HGNC Symbol;Acc:HGNC:9769]	5.10928e-05	0.373589	0.189	0.163	1	mg-TAM 2	All other cells	ND1_7.Neftel_2019_10x Myeloid_cells	0.436631	0.269342	0.1	1000
EZR	ezrin [Source:HGNC Symbol;Acc:HGNC:12691]	5.1895e-05	-0.32313	0.187	0.298	1	mg-TAM 2	All other cells	ND1_7.Neftel_2019_10x Myeloid_cells	0.427246	0.628362	0.1	1000
LMO2	LIM domain only 2 [Source:HGNC Symbol;Acc:HGNC:6642]	5.48246e-05	0.534949	0.256	0.192	1	mg-TAM 2	All other cells	ND1_7.Neftel_2019_10x Myeloid_cells	0.61377	0.318054	0.1	1000
BAG3	BAG cochaperone 3 [Source:HGNC Symbol;Acc:HGNC:939]	5.7466e-05	-1.32359	0.061	0.166	1	mg-TAM 2	All other cells	ND1_7.Neftel_2019_10x Myeloid_cells	0.16196	0.884153	0.1	1000
IRF7	interferon regulatory factor 7 [Source:HGNC Symbol;Acc:HGNC:6122]	5.94915e-05	-0.322263	0.183	0.284	1	mg-TAM 2	All other cells	ND1_7.Neftel_2019_10x Myeloid_cells	0.464783	0.679541	0.1	1000
GSTO1	glutathione S-transferase omega 1 [Source:HGNC Symbol;Acc:HGNC:13312]	6.04251e-05	-0.334149	0.609	0.685	1	mg-TAM 2	All other cells	ND1_7.Neftel_2019_10x Myeloid_cells	2.07302	2.93517	0.1	1000
OAS2	2'-5'-oligoadenylate synthetase 2 [Source:HGNC Symbol;Acc:HGNC:8087]	6.28535e-05	-0.283332	0.071	0.126	1	mg-TAM 2	All other cells	ND1_7.Neftel_2019_10x Myeloid_cells	0.149597	0.231352	0.1	1000
SIGLEC8	sialic acid binding Ig like lectin 8 [Source:HGNC Symbol;Acc:HGNC:10877]	6.61903e-05	0.510675	0.277	0.208	1	mg-TAM 2	All other cells	ND1_7.Neftel_2019_10x Myeloid_cells	0.7327	0.399695	0.1	1000
LRRFIP1	LRR binding FLII interacting protein 1 [Source:HGNC Symbol;Acc:HGNC:6702]	6.70642e-05	-0.289923	0.357	0.507	1	mg-TAM 2	All other cells	ND1_7.Neftel_2019_10x Myeloid_cells	0.969543	1.32926	0.1	1000
DYNLL1	dynein light chain LC8-type 1 [Source:HGNC Symbol;Acc:HGNC:15476]	7.00675e-05	-0.253083	0.686	0.755	1	mg-TAM 2	All other cells	ND1_7.Neftel_2019_10x Myeloid_cells	2.63321	3.42035	0.1	1000
RPS6KA4	ribosomal protein S6 kinase A4 [Source:HGNC Symbol;Acc:HGNC:10433]	7.14351e-05	0.400869	0.283	0.245	1	mg-TAM 2	All other cells	ND1_7.Neftel_2019_10x Myeloid_cells	0.668095	0.414422	0.1	1000
APEX1	apurinic/apyrimidinic endodeoxyribonuclease 1 [Source:HGNC Symbol;Acc:HGNC:587]	7.27691e-05	0.354977	0.587	0.534	1	mg-TAM 2	All other cells	ND1_7.Neftel_2019_10x Myeloid_cells	2	1.3725	0.1	1000
ITPR2	inositol 1,4,5-trisphosphate receptor type 2 [Source:HGNC Symbol;Acc:HGNC:6181]	7.96374e-05	0.481506	0.402	0.323	1	mg-TAM 2	All other cells	ND1_7.Neftel_2019_10x Myeloid_cells	1.13863	0.665291	0.1	1000
UNC93B1	unc-93 homolog B1, TLR signaling regulator [Source:HGNC Symbol;Acc:HGNC:13481]	8.76801e-05	0.319937	0.406	0.387	1	mg-TAM 2	All other cells	ND1_7.Neftel_2019_10x Myeloid_cells	1.14396	0.803356	0.1	1000
ERCC1	ERCC excision repair 1, endonuclease non-catalytic subunit [Source:HGNC Symbol;Acc:HGNC:3433]	8.89844e-05	0.26787	0.57	0.526	1	mg-TAM 2	All other cells	ND1_7.Neftel_2019_10x Myeloid_cells	1.76129	1.3239	0.1	1000
DPYSL2	dihydropyrimidinase like 2 [Source:HGNC Symbol;Acc:HGNC:3014]	9.55735e-05	0.337206	0.385	0.349	1	mg-TAM 2	All other cells	ND1_7.Neftel_2019_10x Myeloid_cells	1.0131	0.694487	0.1	1000
IFRD1	interferon related developmental regulator 1 [Source:HGNC Symbol;Acc:HGNC:5456]	9.61702e-05	-0.275926	0.256	0.364	1	mg-TAM 2	All other cells	ND1_7.Neftel_2019_10x Myeloid_cells	0.817635	1.10921	0.1	1000
SNX9	sorting nexin 9 [Source:HGNC Symbol;Acc:HGNC:14973]	9.82288e-05	-0.256935	0.151	0.243	1	mg-TAM 2	All other cells	ND1_7.Neftel_2019_10x Myeloid_cells	0.321784	0.445351	0.1	1000
FAM91A1	family with sequence similarity 91 member A1 [Source:HGNC Symbol;Acc:HGNC:26306]	0.000101836	-0.264622	0.06	0.124	1	mg-TAM 2	All other cells	ND1_7.Neftel_2019_10x Myeloid_cells	0.121791	0.18898	0.1	1000
HSPA8	heat shock protein family A (Hsp70) member 8 [Source:HGNC Symbol;Acc:HGNC:5241]	0.000106431	-0.288355	0.77	0.802	1	mg-TAM 2	All other cells	ND1_7.Neftel_2019_10x Myeloid_cells	4.1036	5.50857	0.1	1000
IL16	interleukin 16 [Source:HGNC Symbol;Acc:HGNC:5980]	0.000110222	0.467503	0.269	0.212	1	mg-TAM 2	All other cells	ND1_7.Neftel_2019_10x Myeloid_cells	0.645225	0.366932	0.1	1000
LUZP1	leucine zipper protein 1 [Source:HGNC Symbol;Acc:HGNC:14985]	0.000111911	0.475354	0.245	0.19	1	mg-TAM 2	All other cells	ND1_7.Neftel_2019_10x Myeloid_cells	0.566873	0.314572	0.1	1000
DHRS3	dehydrogenase/reductase 3 [Source:HGNC Symbol;Acc:HGNC:17693]	0.000112607	0.268676	0.375	0.353	1	mg-TAM 2	All other cells	ND1_7.Neftel_2019_10x Myeloid_cells	0.976846	0.723131	0.1	1000
TAL1	TAL bHLH transcription factor 1, erythroid differentiation factor [Source:HGNC Symbol;Acc:HGNC:11556]	0.000114212	0.605362	0.181	0.109	1	mg-TAM 2	All other cells	ND1_7.Neftel_2019_10x Myeloid_cells	0.422603	0.185277	0.1	1000
GNB4	G protein subunit beta 4 [Source:HGNC Symbol;Acc:HGNC:20731]	0.000118481	0.277491	0.494	0.456	1	mg-TAM 2	All other cells	ND1_7.Neftel_2019_10x Myeloid_cells	1.47266	1.09158	0.1	1000
NUAK1	NUAK family kinase 1 [Source:HGNC Symbol;Acc:HGNC:14311]	0.000119707	0.371545	0.116	0.086	1	mg-TAM 2	All other cells	ND1_7.Neftel_2019_10x Myeloid_cells	0.244488	0.137582	0.1	1000
CHMP1B	charged multivesicular body protein 1B [Source:HGNC Symbol;Acc:HGNC:24287]	0.000122248	-0.445383	0.305	0.431	1	mg-TAM 2	All other cells	ND1_7.Neftel_2019_10x Myeloid_cells	1.00268	1.62139	0.1	1000
CCNG1	cyclin G1 [Source:HGNC Symbol;Acc:HGNC:1592]	0.000127951	0.277161	0.229	0.213	1	mg-TAM 2	All other cells	ND1_7.Neftel_2019_10x Myeloid_cells	0.506521	0.359702	0.1	1000
MKNK1	MAPK interacting serine/threonine kinase 1 [Source:HGNC Symbol;Acc:HGNC:7110]	0.00012839	0.333207	0.447	0.39	1	mg-TAM 2	All other cells	ND1_7.Neftel_2019_10x Myeloid_cells	1.2952	0.899829	0.1	1000
MIF4GD	MIF4G domain containing [Source:HGNC Symbol;Acc:HGNC:24030]	0.000136639	0.327673	0.347	0.322	1	mg-TAM 2	All other cells	ND1_7.Neftel_2019_10x Myeloid_cells	0.886741	0.611044	0.1	1000
MIR22HG	MIR22 host gene [Source:HGNC Symbol;Acc:HGNC:28219]	0.00014108	-0.318458	0.056	0.108	1	mg-TAM 2	All other cells	ND1_7.Neftel_2019_10x Myeloid_cells	0.115648	0.196517	0.1	1000
CDC123	cell division cycle 123 [Source:HGNC Symbol;Acc:HGNC:16827]	0.00014303	0.313055	0.35	0.325	1	mg-TAM 2	All other cells	ND1_7.Neftel_2019_10x Myeloid_cells	0.872751	0.611285	0.1	1000
CBR4	carbonyl reductase 4 [Source:HGNC Symbol;Acc:HGNC:25891]	0.000144142	0.612622	0.148	0.095	1	mg-TAM 2	All other cells	ND1_7.Neftel_2019_10x Myeloid_cells	0.345928	0.141661	0.1	1000
CSTB	cystatin B [Source:HGNC Symbol;Acc:HGNC:2482]	0.000146761	-0.536747	0.808	0.819	1	mg-TAM 2	All other cells	ND1_7.Neftel_2019_10x Myeloid_cells	4.01849	6.9444	0.1	1000
NSL1	NSL1 component of MIS12 kinetochore complex [Source:HGNC Symbol;Acc:HGNC:24548]	0.000148205	0.317686	0.319	0.285	1	mg-TAM 2	All other cells	ND1_7.Neftel_2019_10x Myeloid_cells	0.752982	0.520827	0.1	1000
PSMA6	proteasome 20S subunit alpha 6 [Source:HGNC Symbol;Acc:HGNC:9535]	0.000148473	-0.348797	0.097	0.185	1	mg-TAM 2	All other cells	ND1_7.Neftel_2019_10x Myeloid_cells	0.223305	0.358239	0.1	1000
CYTH4	cytohesin 4 [Source:HGNC Symbol;Acc:HGNC:9505]	0.000148799	0.373625	0.352	0.304	1	mg-TAM 2	All other cells	ND1_7.Neftel_2019_10x Myeloid_cells	0.930856	0.609471	0.1	1000
HSPE1	heat shock protein family E (Hsp10) member 1 [Source:HGNC Symbol;Acc:HGNC:5269]	0.000148852	-0.463611	0.535	0.645	1	mg-TAM 2	All other cells	ND1_7.Neftel_2019_10x Myeloid_cells	1.78458	2.89612	0.1	1000
IRF8	interferon regulatory factor 8 [Source:HGNC Symbol;Acc:HGNC:5358]	0.000151604	0.364658	0.473	0.406	1	mg-TAM 2	All other cells	ND1_7.Neftel_2019_10x Myeloid_cells	1.50592	1.01521	0.1	1000
CPED1	cadherin like and PC-esterase domain containing 1 [Source:HGNC Symbol;Acc:HGNC:26159]	0.000156615	0.552091	0.18	0.119	1	mg-TAM 2	All other cells	ND1_7.Neftel_2019_10x Myeloid_cells	0.400352	0.188075	0.1	1000
HSBP1	heat shock factor binding protein 1 [Source:HGNC Symbol;Acc:HGNC:5203]	0.000158049	-0.26694	0.519	0.635	1	mg-TAM 2	All other cells	ND1_7.Neftel_2019_10x Myeloid_cells	1.48289	1.9672	0.1	1000
IGSF21	immunoglobin superfamily member 21 [Source:HGNC Symbol;Acc:HGNC:28246]	0.000168925	0.413032	0.206	0.153	1	mg-TAM 2	All other cells	ND1_7.Neftel_2019_10x Myeloid_cells	0.532459	0.318461	0.1	1000
DUSP10	dual specificity phosphatase 10 [Source:HGNC Symbol;Acc:HGNC:3065]	0.000169526	-0.258176	0.064	0.118	1	mg-TAM 2	All other cells	ND1_7.Neftel_2019_10x Myeloid_cells	0.139859	0.210514	0.1	1000
YBX3	Y-box binding protein 3 [Source:HGNC Symbol;Acc:HGNC:2428]	0.00017984	-0.34128	0.227	0.35	1	mg-TAM 2	All other cells	ND1_7.Neftel_2019_10x Myeloid_cells	0.504222	0.749988	0.1	1000
MRPS6	mitochondrial ribosomal protein S6 [Source:HGNC Symbol;Acc:HGNC:14051]	0.000180817	-0.26949	0.176	0.275	1	mg-TAM 2	All other cells	ND1_7.Neftel_2019_10x Myeloid_cells	0.382189	0.531329	0.1	1000
RSRP1	arginine and serine rich protein 1 [Source:HGNC Symbol;Acc:HGNC:25234]	0.000188017	0.412129	0.319	0.268	1	mg-TAM 2	All other cells	ND1_7.Neftel_2019_10x Myeloid_cells	0.898055	0.560951	0.1	1000
DCTPP1	dCTP pyrophosphatase 1 [Source:HGNC Symbol;Acc:HGNC:28777]	0.000191225	-0.263669	0.142	0.233	1	mg-TAM 2	All other cells	ND1_7.Neftel_2019_10x Myeloid_cells	0.297391	0.417283	0.1	1000
GGNBP2	gametogenetin binding protein 2 [Source:HGNC Symbol;Acc:HGNC:19357]	0.000206882	0.360839	0.348	0.309	1	mg-TAM 2	All other cells	ND1_7.Neftel_2019_10x Myeloid_cells	0.876815	0.580929	0.1	1000
NDUFA6	NADH:ubiquinone oxidoreductase subunit A6 [Source:HGNC Symbol;Acc:HGNC:7690]	0.000208013	-0.268256	0.374	0.511	1	mg-TAM 2	All other cells	ND1_7.Neftel_2019_10x Myeloid_cells	0.959734	1.2858	0.1	1000
ATRX	ATRX chromatin remodeler [Source:HGNC Symbol;Acc:HGNC:886]	0.000217211	0.332284	0.406	0.376	1	mg-TAM 2	All other cells	ND1_7.Neftel_2019_10x Myeloid_cells	1.10018	0.760869	0.1	1000
SIPA1	signal-induced proliferation-associated 1 [Source:HGNC Symbol;Acc:HGNC:10885]	0.000221509	0.42173	0.352	0.296	1	mg-TAM 2	All other cells	ND1_7.Neftel_2019_10x Myeloid_cells	0.892579	0.551044	0.1	1000
FAM149A	family with sequence similarity 149 member A [Source:HGNC Symbol;Acc:HGNC:24527]	0.000226877	0.455474	0.128	0.083	1	mg-TAM 2	All other cells	ND1_7.Neftel_2019_10x Myeloid_cells	0.275855	0.138347	0.1	1000
CACYBP	calcyclin binding protein [Source:HGNC Symbol;Acc:HGNC:30423]	0.000228903	-0.352519	0.266	0.394	1	mg-TAM 2	All other cells	ND1_7.Neftel_2019_10x Myeloid_cells	0.612883	0.914181	0.1	1000
SLC29A1	solute carrier family 29 member 1 (Augustine blood group) [Source:HGNC Symbol;Acc:HGNC:11003]	0.000230678	0.273832	0.371	0.35	1	mg-TAM 2	All other cells	ND1_7.Neftel_2019_10x Myeloid_cells	0.984482	0.724705	0.1	1000
MAGEF1	MAGE family member F1 [Source:HGNC Symbol;Acc:HGNC:29639]	0.000242071	0.52632	0.195	0.141	1	mg-TAM 2	All other cells	ND1_7.Neftel_2019_10x Myeloid_cells	0.450476	0.225208	0.1	1000
SESN3	sestrin 3 [Source:HGNC Symbol;Acc:HGNC:23060]	0.000243555	0.342841	0.211	0.182	1	mg-TAM 2	All other cells	ND1_7.Neftel_2019_10x Myeloid_cells	0.475643	0.308563	0.1	1000
DENND3	DENN domain containing 3 [Source:HGNC Symbol;Acc:HGNC:29134]	0.000247512	0.324068	0.374	0.333	1	mg-TAM 2	All other cells	ND1_7.Neftel_2019_10x Myeloid_cells	1.00453	0.698794	0.1	1000
LPIN2	lipin 2 [Source:HGNC Symbol;Acc:HGNC:14450]	0.000250922	0.377456	0.292	0.251	1	mg-TAM 2	All other cells	ND1_7.Neftel_2019_10x Myeloid_cells	0.7164	0.459727	0.1	1000
CENPW	centromere protein W [Source:HGNC Symbol;Acc:HGNC:21488]	0.0002569	-0.289454	0.055	0.103	1	mg-TAM 2	All other cells	ND1_7.Neftel_2019_10x Myeloid_cells	0.113363	0.184988	0.1	1000
NBEAL1	neurobeachin like 1 [Source:HGNC Symbol;Acc:HGNC:20681]	0.000261254	-0.386907	0.386	0.483	1	mg-TAM 2	All other cells	ND1_7.Neftel_2019_10x Myeloid_cells	1.33978	2.01997	0.1	1000
TNFAIP2	TNF alpha induced protein 2 [Source:HGNC Symbol;Acc:HGNC:11895]	0.000263383	-0.28416	0.116	0.186	1	mg-TAM 2	All other cells	ND1_7.Neftel_2019_10x Myeloid_cells	0.255731	0.37264	0.1	1000
SLC29A3	solute carrier family 29 member 3 [Source:HGNC Symbol;Acc:HGNC:23096]	0.000264538	0.510275	0.196	0.144	1	mg-TAM 2	All other cells	ND1_7.Neftel_2019_10x Myeloid_cells	0.455954	0.233756	0.1	1000
HMGN2	high mobility group nucleosomal binding domain 2 [Source:HGNC Symbol;Acc:HGNC:4986]	0.000289791	-0.424815	0.64	0.707	1	mg-TAM 2	All other cells	ND1_7.Neftel_2019_10x Myeloid_cells	2.3386	3.62938	0.1	1000
TIPARP	TCDD inducible poly(ADP-ribose) polymerase [Source:HGNC Symbol;Acc:HGNC:23696]	0.000298045	-0.362799	0.057	0.125	1	mg-TAM 2	All other cells	ND1_7.Neftel_2019_10x Myeloid_cells	0.124998	0.2234	0.1	1000
MGAT4A	alpha-1,3-mannosyl-glycoprotein 4-beta-N-acetylglucosaminyltransferase A [Source:HGNC Symbol;Acc:HGNC:7047]	0.00030884	0.256308	0.587	0.558	1	mg-TAM 2	All other cells	ND1_7.Neftel_2019_10x Myeloid_cells	1.90941	1.45509	0.1	1000
LINC01480	long intergenic non-protein coding RNA 1480 [Source:HGNC Symbol;Acc:HGNC:51124]	0.000329319	0.351899	0.161	0.131	1	mg-TAM 2	All other cells	ND1_7.Neftel_2019_10x Myeloid_cells	0.479869	0.307852	0.1	1000
GIMAP1	GTPase, IMAP family member 1 [Source:HGNC Symbol;Acc:HGNC:23237]	0.000341217	0.515208	0.277	0.205	1	mg-TAM 2	All other cells	ND1_7.Neftel_2019_10x Myeloid_cells	0.674864	0.362885	0.1	1000
AKAP9	A-kinase anchoring protein 9 [Source:HGNC Symbol;Acc:HGNC:379]	0.000353935	0.256271	0.3	0.296	1	mg-TAM 2	All other cells	ND1_7.Neftel_2019_10x Myeloid_cells	0.786875	0.586381	0.1	1000
FAM228B	family with sequence similarity 228 member B [Source:HGNC Symbol;Acc:HGNC:24736]	0.000356433	0.34932	0.123	0.097	1	mg-TAM 2	All other cells	ND1_7.Neftel_2019_10x Myeloid_cells	0.262155	0.15538	0.1	1000
GLA	galactosidase alpha [Source:HGNC Symbol;Acc:HGNC:4296]	0.000364095	-0.294673	0.208	0.307	1	mg-TAM 2	All other cells	ND1_7.Neftel_2019_10x Myeloid_cells	0.512334	0.722173	0.1	1000
SF3B1	splicing factor 3b subunit 1 [Source:HGNC Symbol;Acc:HGNC:10768]	0.000369462	0.279755	0.44	0.426	1	mg-TAM 2	All other cells	ND1_7.Neftel_2019_10x Myeloid_cells	1.22253	0.89979	0.1	1000
NBL1	NBL1, DAN family BMP antagonist [Source:HGNC Symbol;Acc:HGNC:7650]	0.0003837	0.44951	0.193	0.136	1	mg-TAM 2	All other cells	ND1_7.Neftel_2019_10x Myeloid_cells	0.472982	0.265528	0.1	1000
SLC4A7	solute carrier family 4 member 7 [Source:HGNC Symbol;Acc:HGNC:11033]	0.000384791	0.390952	0.308	0.271	1	mg-TAM 2	All other cells	ND1_7.Neftel_2019_10x Myeloid_cells	0.824706	0.525483	0.1	1000
MAP1S	microtubule associated protein 1S [Source:HGNC Symbol;Acc:HGNC:15715]	0.000386957	0.4105	0.237	0.2	1	mg-TAM 2	All other cells	ND1_7.Neftel_2019_10x Myeloid_cells	0.53697	0.322514	0.1	1000
ADIPOR1	adiponectin receptor 1 [Source:HGNC Symbol;Acc:HGNC:24040]	0.000390382	-0.286328	0.253	0.38	1	mg-TAM 2	All other cells	ND1_7.Neftel_2019_10x Myeloid_cells	0.58061	0.806252	0.1	1000
ST6GALNAC6	ST6 N-acetylgalactosaminide alpha-2,6-sialyltransferase 6 [Source:HGNC Symbol;Acc:HGNC:23364]	0.000403947	0.348927	0.14	0.116	1	mg-TAM 2	All other cells	ND1_7.Neftel_2019_10x Myeloid_cells	0.29232	0.17676	0.1	1000
TNFSF10	TNF superfamily member 10 [Source:HGNC Symbol;Acc:HGNC:11925]	0.000405873	0.29724	0.253	0.196	1	mg-TAM 2	All other cells	ND1_7.Neftel_2019_10x Myeloid_cells	0.622176	0.43648	0.1	1000
APOBEC3C	apolipoprotein B mRNA editing enzyme catalytic subunit 3C [Source:HGNC Symbol;Acc:HGNC:17353]	0.000411187	0.433681	0.258	0.211	1	mg-TAM 2	All other cells	ND1_7.Neftel_2019_10x Myeloid_cells	0.64661	0.383892	0.1	1000
PLVAP	plasmalemma vesicle associated protein [Source:HGNC Symbol;Acc:HGNC:13635]	0.000422456	0.560469	0.229	0.146	1	mg-TAM 2	All other cells	ND1_7.Neftel_2019_10x Myeloid_cells	0.546266	0.26898	0.1	1000
FILIP1L	filamin A interacting protein 1 like [Source:HGNC Symbol;Acc:HGNC:24589]	0.000424669	-0.257395	0.095	0.155	1	mg-TAM 2	All other cells	ND1_7.Neftel_2019_10x Myeloid_cells	0.211678	0.303173	0.1	1000
TMX1	thioredoxin related transmembrane protein 1 [Source:HGNC Symbol;Acc:HGNC:15487]	0.000433946	0.2546	0.4	0.396	1	mg-TAM 2	All other cells	ND1_7.Neftel_2019_10x Myeloid_cells	1.04523	0.787815	0.1	1000
HACD4	3-hydroxyacyl-CoA dehydratase 4 [Source:HGNC Symbol;Acc:HGNC:20920]	0.000441108	0.276688	0.268	0.242	1	mg-TAM 2	All other cells	ND1_7.Neftel_2019_10x Myeloid_cells	0.609757	0.438202	0.1	1000
SPECC1	sperm antigen with calponin homology and coiled-coil domains 1 [Source:HGNC Symbol;Acc:HGNC:30615]	0.000448045	0.430843	0.22	0.184	1	mg-TAM 2	All other cells	ND1_7.Neftel_2019_10x Myeloid_cells	0.538961	0.3153	0.1	1000
NDEL1	nudE neurodevelopment protein 1 like 1 [Source:HGNC Symbol;Acc:HGNC:17620]	0.000461569	-0.349856	0.053	0.116	1	mg-TAM 2	All other cells	ND1_7.Neftel_2019_10x Myeloid_cells	0.10873	0.196159	0.1	1000
UVRAG	UV radiation resistance associated [Source:HGNC Symbol;Acc:HGNC:12640]	0.000461639	0.328616	0.169	0.15	1	mg-TAM 2	All other cells	ND1_7.Neftel_2019_10x Myeloid_cells	0.377791	0.243971	0.1	1000
PPP1R14B	protein phosphatase 1 regulatory inhibitor subunit 14B [Source:HGNC Symbol;Acc:HGNC:9057]	0.000469543	-0.295304	0.075	0.15	1	mg-TAM 2	All other cells	ND1_7.Neftel_2019_10x Myeloid_cells	0.151606	0.238041	0.1	1000
IFITM2	interferon induced transmembrane protein 2 [Source:HGNC Symbol;Acc:HGNC:5413]	0.000481473	-0.338368	0.509	0.607	1	mg-TAM 2	All other cells	ND1_7.Neftel_2019_10x Myeloid_cells	1.65801	2.36588	0.1	1000
MTAP	methylthioadenosine phosphorylase [Source:HGNC Symbol;Acc:HGNC:7413]	0.000482517	0.300748	0.102	0.093	1	mg-TAM 2	All other cells	ND1_7.Neftel_2019_10x Myeloid_cells	0.22748	0.142422	0.1	1000
DCK	deoxycytidine kinase [Source:HGNC Symbol;Acc:HGNC:2704]	0.000488486	0.338755	0.32	0.289	1	mg-TAM 2	All other cells	ND1_7.Neftel_2019_10x Myeloid_cells	0.765456	0.516773	0.1	1000
SPSB3	splA/ryanodine receptor domain and SOCS box containing 3 [Source:HGNC Symbol;Acc:HGNC:30629]	0.00049423	0.262632	0.246	0.239	1	mg-TAM 2	All other cells	ND1_7.Neftel_2019_10x Myeloid_cells	0.578524	0.421802	0.1	1000
MAT2A	methionine adenosyltransferase 2A [Source:HGNC Symbol;Acc:HGNC:6904]	0.00049484	-0.284141	0.332	0.445	1	mg-TAM 2	All other cells	ND1_7.Neftel_2019_10x Myeloid_cells	0.938627	1.27994	0.1	1000
FMNL3	formin like 3 [Source:HGNC Symbol;Acc:HGNC:23698]	0.000507526	0.383449	0.271	0.218	1	mg-TAM 2	All other cells	ND1_7.Neftel_2019_10x Myeloid_cells	0.649589	0.41085	0.1	1000
FOSB	FosB proto-oncogene, AP-1 transcription factor subunit [Source:HGNC Symbol;Acc:HGNC:3797]	0.000541598	-0.505803	0.492	0.613	1	mg-TAM 2	All other cells	ND1_7.Neftel_2019_10x Myeloid_cells	2.13191	3.60122	0.1	1000
PTS	6-pyruvoyltetrahydropterin synthase [Source:HGNC Symbol;Acc:HGNC:9689]	0.000544131	-0.326578	0.084	0.144	1	mg-TAM 2	All other cells	ND1_7.Neftel_2019_10x Myeloid_cells	0.173256	0.278792	0.1	1000
SELENBP1	selenium binding protein 1 [Source:HGNC Symbol;Acc:HGNC:10719]	0.000550461	0.601108	0.118	0.063	1	mg-TAM 2	All other cells	ND1_7.Neftel_2019_10x Myeloid_cells	0.276781	0.106553	0.1	1000
STK4	serine/threonine kinase 4 [Source:HGNC Symbol;Acc:HGNC:11408]	0.000567607	0.306549	0.368	0.351	1	mg-TAM 2	All other cells	ND1_7.Neftel_2019_10x Myeloid_cells	1.03112	0.732488	0.1	1000
ISCA1	iron-sulfur cluster assembly 1 [Source:HGNC Symbol;Acc:HGNC:28660]	0.000577843	-0.318996	0.075	0.149	1	mg-TAM 2	All other cells	ND1_7.Neftel_2019_10x Myeloid_cells	0.149357	0.243053	0.1	1000
TGFBR1	transforming growth factor beta receptor 1 [Source:HGNC Symbol;Acc:HGNC:11772]	0.000585084	0.321032	0.426	0.386	1	mg-TAM 2	All other cells	ND1_7.Neftel_2019_10x Myeloid_cells	1.20378	0.84576	0.1	1000
TM2D3	TM2 domain containing 3 [Source:HGNC Symbol;Acc:HGNC:24128]	0.000598179	0.329876	0.228	0.212	1	mg-TAM 2	All other cells	ND1_7.Neftel_2019_10x Myeloid_cells	0.537595	0.358439	0.1	1000
COMMD3	COMM domain containing 3 [Source:HGNC Symbol;Acc:HGNC:23332]	0.000603719	0.344548	0.308	0.263	1	mg-TAM 2	All other cells	ND1_7.Neftel_2019_10x Myeloid_cells	0.763663	0.51194	0.1	1000
DEDD2	death effector domain containing 2 [Source:HGNC Symbol;Acc:HGNC:24450]	0.00061538	-0.257014	0.076	0.139	1	mg-TAM 2	All other cells	ND1_7.Neftel_2019_10x Myeloid_cells	0.152902	0.227018	0.1	1000
DBP	D-box binding PAR bZIP transcription factor [Source:HGNC Symbol;Acc:HGNC:2697]	0.00061969	0.356069	0.103	0.077	1	mg-TAM 2	All other cells	ND1_7.Neftel_2019_10x Myeloid_cells	0.207407	0.115315	0.1	1000
FAM210A	family with sequence similarity 210 member A [Source:HGNC Symbol;Acc:HGNC:28346]	0.000642035	-0.285361	0.057	0.113	1	mg-TAM 2	All other cells	ND1_7.Neftel_2019_10x Myeloid_cells	0.113303	0.183745	0.1	1000
SNAI3	snail family transcriptional repressor 3 [Source:HGNC Symbol;Acc:HGNC:18411]	0.000646893	0.449471	0.11	0.069	1	mg-TAM 2	All other cells	ND1_7.Neftel_2019_10x Myeloid_cells	0.218603	0.103258	0.1	1000
TLR3	toll like receptor 3 [Source:HGNC Symbol;Acc:HGNC:11849]	0.000674337	0.51445	0.195	0.139	1	mg-TAM 2	All other cells	ND1_7.Neftel_2019_10x Myeloid_cells	0.463163	0.236676	0.1	1000
FCHO2	FCH and mu domain containing endocytic adaptor 2 [Source:HGNC Symbol;Acc:HGNC:25180]	0.000677777	-0.254095	0.059	0.125	1	mg-TAM 2	All other cells	ND1_7.Neftel_2019_10x Myeloid_cells	0.145769	0.216869	0.1	1000
DOCK4	dedicator of cytokinesis 4 [Source:HGNC Symbol;Acc:HGNC:19192]	0.000680578	0.308616	0.444	0.402	1	mg-TAM 2	All other cells	ND1_7.Neftel_2019_10x Myeloid_cells	1.31138	0.936607	0.1	1000
SLC18B1	solute carrier family 18 member B1 [Source:HGNC Symbol;Acc:HGNC:21573]	0.00068311	0.316708	0.166	0.138	1	mg-TAM 2	All other cells	ND1_7.Neftel_2019_10x Myeloid_cells	0.368426	0.241268	0.1	1000
MAGED2	MAGE family member D2 [Source:HGNC Symbol;Acc:HGNC:16353]	0.000714866	0.335019	0.322	0.288	1	mg-TAM 2	All other cells	ND1_7.Neftel_2019_10x Myeloid_cells	0.801275	0.544704	0.1	1000
FGD2	FYVE, RhoGEF and PH domain containing 2 [Source:HGNC Symbol;Acc:HGNC:3664]	0.00072487	0.401084	0.254	0.212	1	mg-TAM 2	All other cells	ND1_7.Neftel_2019_10x Myeloid_cells	0.656621	0.406629	0.1	1000
COL18A1	collagen type XVIII alpha 1 chain [Source:HGNC Symbol;Acc:HGNC:2195]	0.000743094	0.558353	0.12	0.069	1	mg-TAM 2	All other cells	ND1_7.Neftel_2019_10x Myeloid_cells	0.259278	0.105561	0.1	1000
SRSF8	serine and arginine rich splicing factor 8 [Source:HGNC Symbol;Acc:HGNC:16988]	0.000758075	0.376826	0.141	0.122	1	mg-TAM 2	All other cells	ND1_7.Neftel_2019_10x Myeloid_cells	0.31082	0.181837	0.1	1000
TMEM30A	transmembrane protein 30A [Source:HGNC Symbol;Acc:HGNC:16667]	0.000785731	0.314353	0.286	0.281	1	mg-TAM 2	All other cells	ND1_7.Neftel_2019_10x Myeloid_cells	0.712826	0.493575	0.1	1000
EIF4EBP1	eukaryotic translation initiation factor 4E binding protein 1 [Source:HGNC Symbol;Acc:HGNC:3288]	0.000796585	-0.250214	0.382	0.483	1	mg-TAM 2	All other cells	ND1_7.Neftel_2019_10x Myeloid_cells	0.96036	1.26182	0.1	1000
MDM4	MDM4 regulator of p53 [Source:HGNC Symbol;Acc:HGNC:6974]	0.000797673	0.464598	0.248	0.198	1	mg-TAM 2	All other cells	ND1_7.Neftel_2019_10x Myeloid_cells	0.684274	0.392828	0.1	1000
LILRB1	leukocyte immunoglobulin like receptor B1 [Source:HGNC Symbol;Acc:HGNC:6605]	0.000802505	0.337767	0.328	0.295	1	mg-TAM 2	All other cells	ND1_7.Neftel_2019_10x Myeloid_cells	0.81682	0.554024	0.1	1000
CBWD5	COBW domain containing 5 [Source:HGNC Symbol;Acc:HGNC:24584]	0.000809506	0.490111	0.135	0.092	1	mg-TAM 2	All other cells	ND1_7.Neftel_2019_10x Myeloid_cells	0.315184	0.154324	0.1	1000
GABPB1-AS1	GABPB1 antisense RNA 1 [Source:HGNC Symbol;Acc:HGNC:44157]	0.000822171	0.41421	0.153	0.121	1	mg-TAM 2	All other cells	ND1_7.Neftel_2019_10x Myeloid_cells	0.379306	0.216755	0.1	1000
EPB41L3	erythrocyte membrane protein band 4.1 like 3 [Source:HGNC Symbol;Acc:HGNC:3380]	0.000834165	-0.269715	0.149	0.243	1	mg-TAM 2	All other cells	ND1_7.Neftel_2019_10x Myeloid_cells	0.324488	0.455905	0.1	1000
EED	embryonic ectoderm development [Source:HGNC Symbol;Acc:HGNC:3188]	0.000858291	0.40089	0.106	0.085	1	mg-TAM 2	All other cells	ND1_7.Neftel_2019_10x Myeloid_cells	0.234114	0.123764	0.1	1000
TRAF3IP3	TRAF3 interacting protein 3 [Source:HGNC Symbol;Acc:HGNC:30766]	0.000882733	0.417087	0.184	0.146	1	mg-TAM 2	All other cells	ND1_7.Neftel_2019_10x Myeloid_cells	0.423381	0.244889	0.1	1000
SNRPN	small nuclear ribonucleoprotein polypeptide N [Source:HGNC Symbol;Acc:HGNC:11164]	0.000908726	0.341988	0.244	0.198	1	mg-TAM 2	All other cells	ND1_7.Neftel_2019_10x Myeloid_cells	0.556217	0.366149	0.1	1000
KIF20B	kinesin family member 20B [Source:HGNC Symbol;Acc:HGNC:7212]	0.000960529	0.427461	0.139	0.106	1	mg-TAM 2	All other cells	ND1_7.Neftel_2019_10x Myeloid_cells	0.326321	0.17803	0.1	1000
IRF1	interferon regulatory factor 1 [Source:HGNC Symbol;Acc:HGNC:6116]	0.000972332	-0.365242	0.093	0.162	1	mg-TAM 2	All other cells	ND1_7.Neftel_2019_10x Myeloid_cells	0.235795	0.383835	0.1	1000
CFD	complement factor D [Source:HGNC Symbol;Acc:HGNC:2771]	0.00101332	-0.25625	0.442	0.506	1	mg-TAM 2	All other cells	ND1_7.Neftel_2019_10x Myeloid_cells	1.51559	1.98747	0.1	1000
SLC43A2	solute carrier family 43 member 2 [Source:HGNC Symbol;Acc:HGNC:23087]	0.00105298	-0.274227	0.207	0.311	1	mg-TAM 2	All other cells	ND1_7.Neftel_2019_10x Myeloid_cells	0.479553	0.662409	0.1	1000
PRCP	prolylcarboxypeptidase [Source:HGNC Symbol;Acc:HGNC:9344]	0.00110419	0.349094	0.313	0.28	1	mg-TAM 2	All other cells	ND1_7.Neftel_2019_10x Myeloid_cells	0.777289	0.518775	0.1	1000
DNAJB9	DnaJ heat shock protein family (Hsp40) member B9 [Source:HGNC Symbol;Acc:HGNC:6968]	0.0011557	-0.524207	0.122	0.208	1	mg-TAM 2	All other cells	ND1_7.Neftel_2019_10x Myeloid_cells	0.271378	0.527302	0.1	1000
COIL	coilin [Source:HGNC Symbol;Acc:HGNC:2184]	0.00117417	0.346747	0.104	0.087	1	mg-TAM 2	All other cells	ND1_7.Neftel_2019_10x Myeloid_cells	0.227228	0.131345	0.1	1000
MTHFD1L	methylenetetrahydrofolate dehydrogenase (NADP+ dependent) 1 like [Source:HGNC Symbol;Acc:HGNC:21055]	0.00119177	0.323175	0.229	0.21	1	mg-TAM 2	All other cells	ND1_7.Neftel_2019_10x Myeloid_cells	0.509973	0.341527	0.1	1000
MTURN	maturin, neural progenitor differentiation regulator homolog [Source:HGNC Symbol;Acc:HGNC:25457]	0.00119728	0.480693	0.116	0.07	1	mg-TAM 2	All other cells	ND1_7.Neftel_2019_10x Myeloid_cells	0.235662	0.107558	0.1	1000
DDX46	DEAD-box helicase 46 [Source:HGNC Symbol;Acc:HGNC:18681]	0.00122262	0.311703	0.422	0.393	1	mg-TAM 2	All other cells	ND1_7.Neftel_2019_10x Myeloid_cells	1.17177	0.831188	0.1	1000
ACSM5	acyl-CoA synthetase medium chain family member 5 [Source:HGNC Symbol;Acc:HGNC:26060]	0.00123237	0.464674	0.157	0.118	1	mg-TAM 2	All other cells	ND1_7.Neftel_2019_10x Myeloid_cells	0.362575	0.190655	0.1	1000
EAPP	E2F associated phosphoprotein [Source:HGNC Symbol;Acc:HGNC:19312]	0.00127608	0.27853	0.26	0.238	1	mg-TAM 2	All other cells	ND1_7.Neftel_2019_10x Myeloid_cells	0.621655	0.446218	0.1	1000
SLC39A3	solute carrier family 39 member 3 [Source:HGNC Symbol;Acc:HGNC:17128]	0.00129688	0.378164	0.255	0.227	1	mg-TAM 2	All other cells	ND1_7.Neftel_2019_10x Myeloid_cells	0.569453	0.358654	0.1	1000
TBC1D12	TBC1 domain family member 12 [Source:HGNC Symbol;Acc:HGNC:29082]	0.00132722	0.392409	0.216	0.192	1	mg-TAM 2	All other cells	ND1_7.Neftel_2019_10x Myeloid_cells	0.517673	0.317193	0.1	1000
NSUN5	NOP2/Sun RNA methyltransferase 5 [Source:HGNC Symbol;Acc:HGNC:16385]	0.00139236	0.308918	0.186	0.17	1	mg-TAM 2	All other cells	ND1_7.Neftel_2019_10x Myeloid_cells	0.41068	0.274962	0.1	1000
NME3	NME/NM23 nucleoside diphosphate kinase 3 [Source:HGNC Symbol;Acc:HGNC:7851]	0.00139306	0.295887	0.424	0.408	1	mg-TAM 2	All other cells	ND1_7.Neftel_2019_10x Myeloid_cells	1.13307	0.817244	0.1	1000
ARRDC1	arrestin domain containing 1 [Source:HGNC Symbol;Acc:HGNC:28633]	0.00144691	0.292371	0.246	0.234	1	mg-TAM 2	All other cells	ND1_7.Neftel_2019_10x Myeloid_cells	0.545074	0.381542	0.1	1000
QPRT	quinolinate phosphoribosyltransferase [Source:HGNC Symbol;Acc:HGNC:9755]	0.00144844	0.442562	0.221	0.175	1	mg-TAM 2	All other cells	ND1_7.Neftel_2019_10x Myeloid_cells	0.512343	0.293362	0.1	1000
NTPCR	nucleoside-triphosphatase, cancer-related [Source:HGNC Symbol;Acc:HGNC:28204]	0.00146759	-0.26208	0.105	0.175	1	mg-TAM 2	All other cells	ND1_7.Neftel_2019_10x Myeloid_cells	0.226202	0.323942	0.1	1000
TATDN3	TatD DNase domain containing 3 [Source:HGNC Symbol;Acc:HGNC:27010]	0.00148712	0.316829	0.149	0.132	1	mg-TAM 2	All other cells	ND1_7.Neftel_2019_10x Myeloid_cells	0.335031	0.2169	0.1	1000
LENG1	leukocyte receptor cluster member 1 [Source:HGNC Symbol;Acc:HGNC:15502]	0.00153135	0.333046	0.181	0.159	1	mg-TAM 2	All other cells	ND1_7.Neftel_2019_10x Myeloid_cells	0.404485	0.261583	0.1	1000
HDAC5	histone deacetylase 5 [Source:HGNC Symbol;Acc:HGNC:14068]	0.00156369	0.283211	0.141	0.124	1	mg-TAM 2	All other cells	ND1_7.Neftel_2019_10x Myeloid_cells	0.29707	0.199137	0.1	1000
CTTNBP2	cortactin binding protein 2 [Source:HGNC Symbol;Acc:HGNC:15679]	0.00158409	0.365627	0.11	0.083	1	mg-TAM 2	All other cells	ND1_7.Neftel_2019_10x Myeloid_cells	0.243761	0.138488	0.1	1000
DLEU7	deleted in lymphocytic leukemia 7 [Source:HGNC Symbol;Acc:HGNC:17567]	0.00158616	0.455964	0.223	0.166	1	mg-TAM 2	All other cells	ND1_7.Neftel_2019_10x Myeloid_cells	0.520335	0.293191	0.1	1000
PHF23	PHD finger protein 23 [Source:HGNC Symbol;Acc:HGNC:28428]	0.00167425	0.423549	0.137	0.105	1	mg-TAM 2	All other cells	ND1_7.Neftel_2019_10x Myeloid_cells	0.290765	0.155841	0.1	1000
TNFAIP8L2	TNF alpha induced protein 8 like 2 [Source:HGNC Symbol;Acc:HGNC:26277]	0.00167819	0.386641	0.36	0.317	1	mg-TAM 2	All other cells	ND1_7.Neftel_2019_10x Myeloid_cells	0.934133	0.602522	0.1	1000
MEF2A	myocyte enhancer factor 2A [Source:HGNC Symbol;Acc:HGNC:6993]	0.00168506	0.324157	0.547	0.506	1	mg-TAM 2	All other cells	ND1_7.Neftel_2019_10x Myeloid_cells	1.87495	1.32816	0.1	1000
SFMBT2	Scm like with four mbt domains 2 [Source:HGNC Symbol;Acc:HGNC:20256]	0.00171194	0.314698	0.27	0.24	1	mg-TAM 2	All other cells	ND1_7.Neftel_2019_10x Myeloid_cells	0.713546	0.493896	0.1	1000
PPM1K	protein phosphatase, Mg2+/Mn2+ dependent 1K [Source:HGNC Symbol;Acc:HGNC:25415]	0.001832	0.437418	0.182	0.138	1	mg-TAM 2	All other cells	ND1_7.Neftel_2019_10x Myeloid_cells	0.41143	0.230231	0.1	1000
PMS1	PMS1 homolog 1, mismatch repair system component [Source:HGNC Symbol;Acc:HGNC:9121]	0.00192586	0.301043	0.107	0.09	1	mg-TAM 2	All other cells	ND1_7.Neftel_2019_10x Myeloid_cells	0.238628	0.1506	0.1	1000
PRMT2	protein arginine methyltransferase 2 [Source:HGNC Symbol;Acc:HGNC:5186]	0.00194624	0.309624	0.41	0.39	1	mg-TAM 2	All other cells	ND1_7.Neftel_2019_10x Myeloid_cells	1.11588	0.792119	0.1	1000
RAMP1	receptor activity modifying protein 1 [Source:HGNC Symbol;Acc:HGNC:9843]	0.00207763	0.284112	0.25	0.192	1	mg-TAM 2	All other cells	ND1_7.Neftel_2019_10x Myeloid_cells	0.748489	0.538643	0.1	1000
ACAA1	acetyl-CoA acyltransferase 1 [Source:HGNC Symbol;Acc:HGNC:82]	0.00214471	0.281416	0.37	0.359	1	mg-TAM 2	All other cells	ND1_7.Neftel_2019_10x Myeloid_cells	0.910391	0.662557	0.1	1000
ZBTB20	zinc finger and BTB domain containing 20 [Source:HGNC Symbol;Acc:HGNC:13503]	0.00220748	0.304042	0.101	0.082	1	mg-TAM 2	All other cells	ND1_7.Neftel_2019_10x Myeloid_cells	0.226437	0.140855	0.1	1000
ZNF503	zinc finger protein 503 [Source:HGNC Symbol;Acc:HGNC:23589]	0.00237262	0.416472	0.169	0.134	1	mg-TAM 2	All other cells	ND1_7.Neftel_2019_10x Myeloid_cells	0.402886	0.231588	0.1	1000
HSP90AA1	heat shock protein 90 alpha family class A member 1 [Source:HGNC Symbol;Acc:HGNC:5253]	0.00238788	-0.463544	0.905	0.89	1	mg-TAM 2	All other cells	ND1_7.Neftel_2019_10x Myeloid_cells	8.11614	12.9612	0.1	1000
RGS12	regulator of G protein signaling 12 [Source:HGNC Symbol;Acc:HGNC:9994]	0.002406	0.323508	0.257	0.226	1	mg-TAM 2	All other cells	ND1_7.Neftel_2019_10x Myeloid_cells	0.618831	0.42015	0.1	1000
SORBS3	sorbin and SH3 domain containing 3 [Source:HGNC Symbol;Acc:HGNC:30907]	0.00244658	-0.27184	0.044	0.101	1	mg-TAM 2	All other cells	ND1_7.Neftel_2019_10x Myeloid_cells	0.0901615	0.149564	0.1	1000
TGFB1	transforming growth factor beta 1 [Source:HGNC Symbol;Acc:HGNC:11766]	0.00245942	0.25063	0.531	0.511	1	mg-TAM 2	All other cells	ND1_7.Neftel_2019_10x Myeloid_cells	1.6828	1.28757	0.1	1000
PHF14	PHD finger protein 14 [Source:HGNC Symbol;Acc:HGNC:22203]	0.0024871	0.374159	0.212	0.187	1	mg-TAM 2	All other cells	ND1_7.Neftel_2019_10x Myeloid_cells	0.505933	0.316802	0.1	1000
SHPRH	SNF2 histone linker PHD RING helicase [Source:HGNC Symbol;Acc:HGNC:19336]	0.00250418	0.348167	0.11	0.09	1	mg-TAM 2	All other cells	ND1_7.Neftel_2019_10x Myeloid_cells	0.245018	0.143576	0.1	1000
NFKB1	nuclear factor kappa B subunit 1 [Source:HGNC Symbol;Acc:HGNC:7794]	0.00260725	-0.340525	0.076	0.141	1	mg-TAM 2	All other cells	ND1_7.Neftel_2019_10x Myeloid_cells	0.157421	0.261853	0.1	1000
PLEK	pleckstrin [Source:HGNC Symbol;Acc:HGNC:9070]	0.00265994	-0.284785	0.437	0.506	1	mg-TAM 2	All other cells	ND1_7.Neftel_2019_10x Myeloid_cells	1.24571	1.68909	0.1	1000
FAM3B	FAM3 metabolism regulating signaling molecule B [Source:HGNC Symbol;Acc:HGNC:1253]	0.00268776	0.491433	0.106	0.066	1	mg-TAM 2	All other cells	ND1_7.Neftel_2019_10x Myeloid_cells	0.225462	0.0991014	0.1	1000
REL	REL proto-oncogene, NF-kB subunit [Source:HGNC Symbol;Acc:HGNC:9954]	0.0026925	-0.323106	0.436	0.552	1	mg-TAM 2	All other cells	ND1_7.Neftel_2019_10x Myeloid_cells	1.31221	1.85084	0.1	1000
SPG7	SPG7 matrix AAA peptidase subunit, paraplegin [Source:HGNC Symbol;Acc:HGNC:11237]	0.00274074	0.256355	0.181	0.175	1	mg-TAM 2	All other cells	ND1_7.Neftel_2019_10x Myeloid_cells	0.414961	0.298511	0.1	1000
TSNAX	translin associated factor X [Source:HGNC Symbol;Acc:HGNC:12380]	0.00276854	0.350104	0.241	0.214	1	mg-TAM 2	All other cells	ND1_7.Neftel_2019_10x Myeloid_cells	0.575918	0.376262	0.1	1000
ALDH9A1	aldehyde dehydrogenase 9 family member A1 [Source:HGNC Symbol;Acc:HGNC:412]	0.00286298	0.283404	0.246	0.231	1	mg-TAM 2	All other cells	ND1_7.Neftel_2019_10x Myeloid_cells	0.555423	0.393675	0.1	1000
PLCG2	phospholipase C gamma 2 [Source:HGNC Symbol;Acc:HGNC:9066]	0.00317288	0.522527	0.212	0.185	1	mg-TAM 2	All other cells	ND1_7.Neftel_2019_10x Myeloid_cells	0.677901	0.361311	0.1	1000
C19orf38	chromosome 19 open reading frame 38 [Source:HGNC Symbol;Acc:HGNC:34073]	0.00318562	0.34182	0.196	0.17	1	mg-TAM 2	All other cells	ND1_7.Neftel_2019_10x Myeloid_cells	0.43089	0.277184	0.1	1000
PMPCB	peptidase, mitochondrial processing subunit beta [Source:HGNC Symbol;Acc:HGNC:9119]	0.00325016	0.25014	0.244	0.235	1	mg-TAM 2	All other cells	ND1_7.Neftel_2019_10x Myeloid_cells	0.54123	0.399321	0.1	1000
ST3GAL6	ST3 beta-galactoside alpha-2,3-sialyltransferase 6 [Source:HGNC Symbol;Acc:HGNC:18080]	0.00325544	0.397371	0.262	0.222	1	mg-TAM 2	All other cells	ND1_7.Neftel_2019_10x Myeloid_cells	0.659902	0.410719	0.1	1000
CWF19L2	CWF19 like cell cycle control factor 2 [Source:HGNC Symbol;Acc:HGNC:26508]	0.00327589	0.469086	0.149	0.108	1	mg-TAM 2	All other cells	ND1_7.Neftel_2019_10x Myeloid_cells	0.354662	0.184425	0.1	1000
BAZ2B	bromodomain adjacent to zinc finger domain 2B [Source:HGNC Symbol;Acc:HGNC:963]	0.00335943	0.296937	0.253	0.238	1	mg-TAM 2	All other cells	ND1_7.Neftel_2019_10x Myeloid_cells	0.601899	0.421574	0.1	1000
C1orf56	chromosome 1 open reading frame 56 [Source:HGNC Symbol;Acc:HGNC:26045]	0.00338179	0.356767	0.226	0.176	1	mg-TAM 2	All other cells	ND1_7.Neftel_2019_10x Myeloid_cells	0.626104	0.408226	0.1	1000
MYCBP2	MYC binding protein 2 [Source:HGNC Symbol;Acc:HGNC:23386]	0.00347757	0.305424	0.334	0.314	1	mg-TAM 2	All other cells	ND1_7.Neftel_2019_10x Myeloid_cells	0.842748	0.594627	0.1	1000
GPATCH11	G-patch domain containing 11 [Source:HGNC Symbol;Acc:HGNC:26768]	0.00351764	0.353251	0.127	0.106	1	mg-TAM 2	All other cells	ND1_7.Neftel_2019_10x Myeloid_cells	0.281851	0.168213	0.1	1000
COQ7	coenzyme Q7, hydroxylase [Source:HGNC Symbol;Acc:HGNC:2244]	0.00354641	0.558524	0.176	0.124	1	mg-TAM 2	All other cells	ND1_7.Neftel_2019_10x Myeloid_cells	0.448178	0.213587	0.1	1000
BRD3	bromodomain containing 3 [Source:HGNC Symbol;Acc:HGNC:1104]	0.00356341	0.339214	0.132	0.116	1	mg-TAM 2	All other cells	ND1_7.Neftel_2019_10x Myeloid_cells	0.287985	0.176373	0.1	1000
MSLN	mesothelin [Source:HGNC Symbol;Acc:HGNC:7371]	0.00366147	0.459336	0.113	0.073	1	mg-TAM 2	All other cells	ND1_7.Neftel_2019_10x Myeloid_cells	0.246648	0.118978	0.1	1000
CMTR2	cap methyltransferase 2 [Source:HGNC Symbol;Acc:HGNC:25635]	0.00380413	0.540489	0.152	0.105	1	mg-TAM 2	All other cells	ND1_7.Neftel_2019_10x Myeloid_cells	0.361176	0.168618	0.1	1000
FOXP1	forkhead box P1 [Source:HGNC Symbol;Acc:HGNC:3823]	0.00387795	-0.422779	0.111	0.184	1	mg-TAM 2	All other cells	ND1_7.Neftel_2019_10x Myeloid_cells	0.245586	0.427432	0.1	1000
IFIT1	interferon induced protein with tetratricopeptide repeats 1 [Source:HGNC Symbol;Acc:HGNC:5407]	0.00397343	-0.518835	0.093	0.124	1	mg-TAM 2	All other cells	ND1_7.Neftel_2019_10x Myeloid_cells	0.225904	0.447541	0.1	1000
CCDC66	coiled-coil domain containing 66 [Source:HGNC Symbol;Acc:HGNC:27709]	0.00401783	0.410799	0.152	0.122	1	mg-TAM 2	All other cells	ND1_7.Neftel_2019_10x Myeloid_cells	0.346112	0.195826	0.1	1000
GLCE	glucuronic acid epimerase [Source:HGNC Symbol;Acc:HGNC:17855]	0.00410704	0.42168	0.12	0.079	1	mg-TAM 2	All other cells	ND1_7.Neftel_2019_10x Myeloid_cells	0.257404	0.134437	0.1	1000
RSBN1L	round spermatid basic protein 1 like [Source:HGNC Symbol;Acc:HGNC:24765]	0.00410886	0.39994	0.227	0.19	1	mg-TAM 2	All other cells	ND1_7.Neftel_2019_10x Myeloid_cells	0.552652	0.337512	0.1	1000
ZNF518A	zinc finger protein 518A [Source:HGNC Symbol;Acc:HGNC:29009]	0.00434522	0.419426	0.129	0.102	1	mg-TAM 2	All other cells	ND1_7.Neftel_2019_10x Myeloid_cells	0.289669	0.156178	0.1	1000
PTCRA	pre T cell antigen receptor alpha [Source:HGNC Symbol;Acc:HGNC:21290]	0.00446034	0.472459	0.137	0.095	1	mg-TAM 2	All other cells	ND1_7.Neftel_2019_10x Myeloid_cells	0.330173	0.168199	0.1	1000
LPL	lipoprotein lipase [Source:HGNC Symbol;Acc:HGNC:6677]	0.00448208	-0.257965	0.09	0.144	1	mg-TAM 2	All other cells	ND1_7.Neftel_2019_10x Myeloid_cells	0.251101	0.354427	0.1	1000
IGLC2	immunoglobulin lambda constant 2 [Source:HGNC Symbol;Acc:HGNC:5856]	0.00458774	0.387294	0.148	0.113	1	mg-TAM 2	All other cells	ND1_7.Neftel_2019_10x Myeloid_cells	0.31691	0.183037	0.1	1000
RPS6KA1	ribosomal protein S6 kinase A1 [Source:HGNC Symbol;Acc:HGNC:10430]	0.0046172	0.30709	0.31	0.294	1	mg-TAM 2	All other cells	ND1_7.Neftel_2019_10x Myeloid_cells	0.758744	0.531678	0.1	1000
MAP1LC3B	microtubule associated protein 1 light chain 3 beta [Source:HGNC Symbol;Acc:HGNC:13352]	0.00467836	-0.264141	0.387	0.505	1	mg-TAM 2	All other cells	ND1_7.Neftel_2019_10x Myeloid_cells	0.972899	1.29725	0.1	1000
JKAMP	JNK1/MAPK8 associated membrane protein [Source:HGNC Symbol;Acc:HGNC:20184]	0.00468333	0.305784	0.253	0.25	1	mg-TAM 2	All other cells	ND1_7.Neftel_2019_10x Myeloid_cells	0.611512	0.424061	0.1	1000
ARMCX6	armadillo repeat containing X-linked 6 [Source:HGNC Symbol;Acc:HGNC:26094]	0.00475858	0.379228	0.334	0.3	1	mg-TAM 2	All other cells	ND1_7.Neftel_2019_10x Myeloid_cells	0.827307	0.534639	0.1	1000
DHX36	DEAH-box helicase 36 [Source:HGNC Symbol;Acc:HGNC:14410]	0.00478633	0.256994	0.278	0.282	1	mg-TAM 2	All other cells	ND1_7.Neftel_2019_10x Myeloid_cells	0.679711	0.503007	0.1	1000
MAP4K4	mitogen-activated protein kinase kinase kinase kinase 4 [Source:HGNC Symbol;Acc:HGNC:6866]	0.00479506	0.29012	0.191	0.169	1	mg-TAM 2	All other cells	ND1_7.Neftel_2019_10x Myeloid_cells	0.423191	0.291438	0.1	1000
GATM	glycine amidinotransferase [Source:HGNC Symbol;Acc:HGNC:4175]	0.00480246	0.280998	0.372	0.336	1	mg-TAM 2	All other cells	ND1_7.Neftel_2019_10x Myeloid_cells	0.962277	0.70205	0.1	1000
WIPF3	WAS/WASL interacting protein family member 3 [Source:HGNC Symbol;Acc:HGNC:22004]	0.00487088	0.383738	0.206	0.158	1	mg-TAM 2	All other cells	ND1_7.Neftel_2019_10x Myeloid_cells	0.456217	0.278956	0.1	1000
RTCB	RNA 2',3'-cyclic phosphate and 5'-OH ligase [Source:HGNC Symbol;Acc:HGNC:26935]	0.00501976	0.381016	0.371	0.334	1	mg-TAM 2	All other cells	ND1_7.Neftel_2019_10x Myeloid_cells	0.946357	0.614836	0.1	1000
RTF1	RTF1 homolog, Paf1/RNA polymerase II complex component [Source:HGNC Symbol;Acc:HGNC:28996]	0.00530719	0.282377	0.312	0.312	1	mg-TAM 2	All other cells	ND1_7.Neftel_2019_10x Myeloid_cells	0.785313	0.567516	0.1	1000
MYOZ1	myozenin 1 [Source:HGNC Symbol;Acc:HGNC:13752]	0.00562096	0.48292	0.103	0.061	1	mg-TAM 2	All other cells	ND1_7.Neftel_2019_10x Myeloid_cells	0.232532	0.105165	0.1	1000
IRF5	interferon regulatory factor 5 [Source:HGNC Symbol;Acc:HGNC:6120]	0.00566355	0.32619	0.231	0.204	1	mg-TAM 2	All other cells	ND1_7.Neftel_2019_10x Myeloid_cells	0.528361	0.353468	0.1	1000
MTERF4	mitochondrial transcription termination factor 4 [Source:HGNC Symbol;Acc:HGNC:28785]	0.00572613	0.367272	0.126	0.106	1	mg-TAM 2	All other cells	ND1_7.Neftel_2019_10x Myeloid_cells	0.271825	0.157534	0.1	1000
PSMA3-AS1	PSMA3 antisense RNA 1 [Source:HGNC Symbol;Acc:HGNC:26445]	0.00574403	0.403972	0.209	0.167	1	mg-TAM 2	All other cells	ND1_7.Neftel_2019_10x Myeloid_cells	0.486381	0.291505	0.1	1000
FABP3	fatty acid binding protein 3 [Source:HGNC Symbol;Acc:HGNC:3557]	0.00589498	-0.548788	0.077	0.138	1	mg-TAM 2	All other cells	ND1_7.Neftel_2019_10x Myeloid_cells	0.17902	0.383027	0.1	1000
NCOR1	nuclear receptor corepressor 1 [Source:HGNC Symbol;Acc:HGNC:7672]	0.00602858	0.312097	0.369	0.346	1	mg-TAM 2	All other cells	ND1_7.Neftel_2019_10x Myeloid_cells	0.915369	0.643159	0.1	1000
TM9SF2	transmembrane 9 superfamily member 2 [Source:HGNC Symbol;Acc:HGNC:11865]	0.00608911	0.307958	0.358	0.335	1	mg-TAM 2	All other cells	ND1_7.Neftel_2019_10x Myeloid_cells	0.925144	0.653425	0.1	1000
GIMAP2	GTPase, IMAP family member 2 [Source:HGNC Symbol;Acc:HGNC:21789]	0.00632763	0.373417	0.214	0.174	1	mg-TAM 2	All other cells	ND1_7.Neftel_2019_10x Myeloid_cells	0.463674	0.288021	0.1	1000
ZNF302	zinc finger protein 302 [Source:HGNC Symbol;Acc:HGNC:13848]	0.00638749	0.40826	0.126	0.081	1	mg-TAM 2	All other cells	ND1_7.Neftel_2019_10x Myeloid_cells	0.288012	0.157953	0.1	1000
RBM5	RNA binding motif protein 5 [Source:HGNC Symbol;Acc:HGNC:9902]	0.00646853	0.345539	0.182	0.16	1	mg-TAM 2	All other cells	ND1_7.Neftel_2019_10x Myeloid_cells	0.432273	0.276763	0.1	1000
ZNF467	zinc finger protein 467 [Source:HGNC Symbol;Acc:HGNC:23154]	0.00647253	0.399124	0.143	0.113	1	mg-TAM 2	All other cells	ND1_7.Neftel_2019_10x Myeloid_cells	0.302453	0.170009	0.1	1000
SOWAHD	sosondowah ankyrin repeat domain family member D [Source:HGNC Symbol;Acc:HGNC:32960]	0.00647474	0.502448	0.107	0.066	1	mg-TAM 2	All other cells	ND1_7.Neftel_2019_10x Myeloid_cells	0.221122	0.0942943	0.1	1000
USP15	ubiquitin specific peptidase 15 [Source:HGNC Symbol;Acc:HGNC:12613]	0.0065924	0.271498	0.33	0.324	1	mg-TAM 2	All other cells	ND1_7.Neftel_2019_10x Myeloid_cells	0.861441	0.632846	0.1	1000
P2RY11	purinergic receptor P2Y11 [Source:HGNC Symbol;Acc:HGNC:8540]	0.0065998	0.423513	0.196	0.162	1	mg-TAM 2	All other cells	ND1_7.Neftel_2019_10x Myeloid_cells	0.464456	0.269573	0.1	1000
IVD	isovaleryl-CoA dehydrogenase [Source:HGNC Symbol;Acc:HGNC:6186]	0.0069174	0.430365	0.232	0.189	1	mg-TAM 2	All other cells	ND1_7.Neftel_2019_10x Myeloid_cells	0.527769	0.308221	0.1	1000
MCCC1	methylcrotonoyl-CoA carboxylase 1 [Source:HGNC Symbol;Acc:HGNC:6936]	0.00694345	0.302862	0.107	0.087	1	mg-TAM 2	All other cells	ND1_7.Neftel_2019_10x Myeloid_cells	0.216017	0.133442	0.1	1000
TMEM243	transmembrane protein 243 [Source:HGNC Symbol;Acc:HGNC:21707]	0.00709789	0.290536	0.29	0.273	1	mg-TAM 2	All other cells	ND1_7.Neftel_2019_10x Myeloid_cells	0.687957	0.489284	0.1	1000
PLCB2	phospholipase C beta 2 [Source:HGNC Symbol;Acc:HGNC:9055]	0.00717291	0.298325	0.24	0.219	1	mg-TAM 2	All other cells	ND1_7.Neftel_2019_10x Myeloid_cells	0.558157	0.388392	0.1	1000
TMEM154	transmembrane protein 154 [Source:HGNC Symbol;Acc:HGNC:26489]	0.00721698	0.368141	0.112	0.085	1	mg-TAM 2	All other cells	ND1_7.Neftel_2019_10x Myeloid_cells	0.241922	0.136617	0.1	1000
RASAL2	RAS protein activator like 2 [Source:HGNC Symbol;Acc:HGNC:9874]	0.00727239	0.411952	0.155	0.119	1	mg-TAM 2	All other cells	ND1_7.Neftel_2019_10x Myeloid_cells	0.341355	0.192334	0.1	1000
ATF6B	activating transcription factor 6 beta [Source:HGNC Symbol;Acc:HGNC:2349]	0.0075	0.414868	0.335	0.282	1	mg-TAM 2	All other cells	ND1_7.Neftel_2019_10x Myeloid_cells	0.833606	0.516579	0.1	1000
ERO1A	endoplasmic reticulum oxidoreductase 1 alpha [Source:HGNC Symbol;Acc:HGNC:13280]	0.00750156	-0.469653	0.082	0.137	1	mg-TAM 2	All other cells	ND1_7.Neftel_2019_10x Myeloid_cells	0.1774	0.343684	0.1	1000
RNASE2	ribonuclease A family member 2 [Source:HGNC Symbol;Acc:HGNC:10045]	0.00778799	-0.289525	0.312	0.398	1	mg-TAM 2	All other cells	ND1_7.Neftel_2019_10x Myeloid_cells	0.911506	1.25116	0.1	1000
POLR2B	RNA polymerase II subunit B [Source:HGNC Symbol;Acc:HGNC:9188]	0.00784737	0.396418	0.203	0.17	1	mg-TAM 2	All other cells	ND1_7.Neftel_2019_10x Myeloid_cells	0.451895	0.271273	0.1	1000
TMEM52B	transmembrane protein 52B [Source:HGNC Symbol;Acc:HGNC:26438]	0.00808294	0.411715	0.217	0.176	1	mg-TAM 2	All other cells	ND1_7.Neftel_2019_10x Myeloid_cells	0.51248	0.305776	0.1	1000
OXR1	oxidation resistance 1 [Source:HGNC Symbol;Acc:HGNC:15822]	0.00821239	0.318222	0.201	0.18	1	mg-TAM 2	All other cells	ND1_7.Neftel_2019_10x Myeloid_cells	0.462282	0.309027	0.1	1000
GSTM3	glutathione S-transferase mu 3 [Source:HGNC Symbol;Acc:HGNC:4635]	0.00822429	0.348889	0.158	0.133	1	mg-TAM 2	All other cells	ND1_7.Neftel_2019_10x Myeloid_cells	0.390431	0.245985	0.1	1000
BTG1	BTG anti-proliferation factor 1 [Source:HGNC Symbol;Acc:HGNC:1130]	0.00825743	-0.419475	0.782	0.786	1	mg-TAM 2	All other cells	ND1_7.Neftel_2019_10x Myeloid_cells	4.36596	6.69346	0.1	1000
PRKD3	protein kinase D3 [Source:HGNC Symbol;Acc:HGNC:9408]	0.00833939	0.427962	0.176	0.143	1	mg-TAM 2	All other cells	ND1_7.Neftel_2019_10x Myeloid_cells	0.411579	0.233466	0.1	1000
CFAP97	cilia and flagella associated protein 97 [Source:HGNC Symbol;Acc:HGNC:29276]	0.00870705	0.403538	0.164	0.139	1	mg-TAM 2	All other cells	ND1_7.Neftel_2019_10x Myeloid_cells	0.37071	0.214412	0.1	1000
CD33	CD33 molecule [Source:HGNC Symbol;Acc:HGNC:1659]	0.00886852	0.260161	0.384	0.366	1	mg-TAM 2	All other cells	ND1_7.Neftel_2019_10x Myeloid_cells	0.969389	0.724422	0.1	1000
MAF	MAF bZIP transcription factor [Source:HGNC Symbol;Acc:HGNC:6776]	0.00947439	0.276215	0.377	0.349	1	mg-TAM 2	All other cells	ND1_7.Neftel_2019_10x Myeloid_cells	1.0238	0.752571	0.1	1000
IFIT2	interferon induced protein with tetratricopeptide repeats 2 [Source:HGNC Symbol;Acc:HGNC:5409]	0.00967188	-0.371947	0.095	0.119	1	mg-TAM 2	All other cells	ND1_7.Neftel_2019_10x Myeloid_cells	0.269035	0.435306	0.1	1000
KLF3	Kruppel like factor 3 [Source:HGNC Symbol;Acc:HGNC:16516]	0.00992426	0.334717	0.279	0.257	1	mg-TAM 2	All other cells	ND1_7.Neftel_2019_10x Myeloid_cells	0.672982	0.4531	0.1	1000
RTN2	reticulon 2 [Source:HGNC Symbol;Acc:HGNC:10468]	0.0100635	0.355308	0.146	0.12	1	mg-TAM 2	All other cells	ND1_7.Neftel_2019_10x Myeloid_cells	0.311262	0.188277	0.1	1000
ETV5	ETS variant transcription factor 5 [Source:HGNC Symbol;Acc:HGNC:3494]	0.0103681	0.339565	0.316	0.298	1	mg-TAM 2	All other cells	ND1_7.Neftel_2019_10x Myeloid_cells	0.818008	0.553695	0.1	1000
ATP6V1G1	ATPase H+ transporting V1 subunit G1 [Source:HGNC Symbol;Acc:HGNC:864]	0.0104573	-0.253079	0.611	0.711	1	mg-TAM 2	All other cells	ND1_7.Neftel_2019_10x Myeloid_cells	1.96793	2.56346	0.1	1000
GALNT1	polypeptide N-acetylgalactosaminyltransferase 1 [Source:HGNC Symbol;Acc:HGNC:4123]	0.0105451	0.327836	0.232	0.215	1	mg-TAM 2	All other cells	ND1_7.Neftel_2019_10x Myeloid_cells	0.53176	0.355172	0.1	1000
APOL6	apolipoprotein L6 [Source:HGNC Symbol;Acc:HGNC:14870]	0.010918	-0.273793	0.081	0.14	1	mg-TAM 2	All other cells	ND1_7.Neftel_2019_10x Myeloid_cells	0.16259	0.24529	0.1	1000
KIAA2026	KIAA2026 [Source:HGNC Symbol;Acc:HGNC:23378]	0.0109555	0.33284	0.146	0.13	1	mg-TAM 2	All other cells	ND1_7.Neftel_2019_10x Myeloid_cells	0.333732	0.210936	0.1	1000
TLR7	toll like receptor 7 [Source:HGNC Symbol;Acc:HGNC:15631]	0.0110049	0.322317	0.214	0.188	1	mg-TAM 2	All other cells	ND1_7.Neftel_2019_10x Myeloid_cells	0.489002	0.326713	0.1	1000
RGS18	regulator of G protein signaling 18 [Source:HGNC Symbol;Acc:HGNC:14261]	0.0114856	0.352059	0.179	0.152	1	mg-TAM 2	All other cells	ND1_7.Neftel_2019_10x Myeloid_cells	0.411811	0.259926	0.1	1000
WDFY2	WD repeat and FYVE domain containing 2 [Source:HGNC Symbol;Acc:HGNC:20482]	0.0117335	0.287	0.127	0.12	1	mg-TAM 2	All other cells	ND1_7.Neftel_2019_10x Myeloid_cells	0.29039	0.192992	0.1	1000
VAT1	vesicle amine transport 1 [Source:HGNC Symbol;Acc:HGNC:16919]	0.0129394	-0.307371	0.097	0.175	1	mg-TAM 2	All other cells	ND1_7.Neftel_2019_10x Myeloid_cells	0.215182	0.328599	0.1	1000
HSPBAP1	HSPB1 associated protein 1 [Source:HGNC Symbol;Acc:HGNC:16389]	0.0131819	0.298703	0.131	0.113	1	mg-TAM 2	All other cells	ND1_7.Neftel_2019_10x Myeloid_cells	0.284222	0.185008	0.1	1000
PANK2	pantothenate kinase 2 [Source:HGNC Symbol;Acc:HGNC:15894]	0.0135185	0.344573	0.204	0.183	1	mg-TAM 2	All other cells	ND1_7.Neftel_2019_10x Myeloid_cells	0.447746	0.28809	0.1	1000
BCL2	BCL2 apoptosis regulator [Source:HGNC Symbol;Acc:HGNC:990]	0.0140061	-0.259834	0.062	0.108	1	mg-TAM 2	All other cells	ND1_7.Neftel_2019_10x Myeloid_cells	0.125378	0.192251	0.1	1000
SORT1	sortilin 1 [Source:HGNC Symbol;Acc:HGNC:11186]	0.0142778	0.407242	0.236	0.205	1	mg-TAM 2	All other cells	ND1_7.Neftel_2019_10x Myeloid_cells	0.546813	0.330443	0.1	1000
FNTA	farnesyltransferase, CAAX box, alpha [Source:HGNC Symbol;Acc:HGNC:3782]	0.0144191	0.335136	0.347	0.321	1	mg-TAM 2	All other cells	ND1_7.Neftel_2019_10x Myeloid_cells	0.815071	0.554496	0.1	1000
PRRG4	proline rich and Gla domain 4 [Source:HGNC Symbol;Acc:HGNC:30799]	0.0145627	0.39831	0.155	0.123	1	mg-TAM 2	All other cells	ND1_7.Neftel_2019_10x Myeloid_cells	0.341089	0.196171	0.1	1000
PAQR8	progestin and adipoQ receptor family member 8 [Source:HGNC Symbol;Acc:HGNC:15708]	0.0146569	0.281167	0.127	0.114	1	mg-TAM 2	All other cells	ND1_7.Neftel_2019_10x Myeloid_cells	0.267349	0.177313	0.1	1000
CCL5	C-C motif chemokine ligand 5 [Source:HGNC Symbol;Acc:HGNC:10632]	0.0146968	-0.540442	0.093	0.121	1	mg-TAM 2	All other cells	ND1_7.Neftel_2019_10x Myeloid_cells	0.228879	0.464608	0.1	1000
RASAL3	RAS protein activator like 3 [Source:HGNC Symbol;Acc:HGNC:26129]	0.0147814	0.438558	0.211	0.176	1	mg-TAM 2	All other cells	ND1_7.Neftel_2019_10x Myeloid_cells	0.49038	0.280775	0.1	1000
RBM25	RNA binding motif protein 25 [Source:HGNC Symbol;Acc:HGNC:23244]	0.0150755	0.263476	0.419	0.419	1	mg-TAM 2	All other cells	ND1_7.Neftel_2019_10x Myeloid_cells	1.194	0.894282	0.1	1000
P2RX7	purinergic receptor P2X 7 [Source:HGNC Symbol;Acc:HGNC:8537]	0.0153313	0.401833	0.179	0.144	1	mg-TAM 2	All other cells	ND1_7.Neftel_2019_10x Myeloid_cells	0.423159	0.250042	0.1	1000
ZDHHC21	zinc finger DHHC-type palmitoyltransferase 21 [Source:HGNC Symbol;Acc:HGNC:20750]	0.0155601	0.412204	0.103	0.08	1	mg-TAM 2	All other cells	ND1_7.Neftel_2019_10x Myeloid_cells	0.241588	0.126196	0.1	1000
IWS1	interacts with SUPT6H, CTD assembly factor 1 [Source:HGNC Symbol;Acc:HGNC:25467]	0.0155875	0.346123	0.156	0.141	1	mg-TAM 2	All other cells	ND1_7.Neftel_2019_10x Myeloid_cells	0.342327	0.212913	0.1	1000
NUB1	negative regulator of ubiquitin like proteins 1 [Source:HGNC Symbol;Acc:HGNC:17623]	0.0157036	0.261898	0.193	0.191	1	mg-TAM 2	All other cells	ND1_7.Neftel_2019_10x Myeloid_cells	0.451104	0.324124	0.1	1000
RPL7L1	ribosomal protein L7 like 1 [Source:HGNC Symbol;Acc:HGNC:21370]	0.016004	0.353463	0.316	0.292	1	mg-TAM 2	All other cells	ND1_7.Neftel_2019_10x Myeloid_cells	0.773481	0.513404	0.1	1000
IRF2	interferon regulatory factor 2 [Source:HGNC Symbol;Acc:HGNC:6117]	0.0163704	0.26815	0.246	0.23	1	mg-TAM 2	All other cells	ND1_7.Neftel_2019_10x Myeloid_cells	0.55495	0.400901	0.1	1000
ADAM10	ADAM metallopeptidase domain 10 [Source:HGNC Symbol;Acc:HGNC:188]	0.0167004	0.353925	0.286	0.252	1	mg-TAM 2	All other cells	ND1_7.Neftel_2019_10x Myeloid_cells	0.687447	0.452731	0.1	1000
STK17A	serine/threonine kinase 17a [Source:HGNC Symbol;Acc:HGNC:11395]	0.0168068	0.421736	0.312	0.271	1	mg-TAM 2	All other cells	ND1_7.Neftel_2019_10x Myeloid_cells	0.793072	0.485772	0.1	1000
NSMCE3	NSE3 homolog, SMC5-SMC6 complex component [Source:HGNC Symbol;Acc:HGNC:7677]	0.0172817	0.354678	0.11	0.092	1	mg-TAM 2	All other cells	ND1_7.Neftel_2019_10x Myeloid_cells	0.233674	0.134039	0.1	1000
RPP38	ribonuclease P/MRP subunit p38 [Source:HGNC Symbol;Acc:HGNC:30329]	0.0173218	0.30597	0.105	0.094	1	mg-TAM 2	All other cells	ND1_7.Neftel_2019_10x Myeloid_cells	0.22472	0.139127	0.1	1000
WDR70	WD repeat domain 70 [Source:HGNC Symbol;Acc:HGNC:25495]	0.0174618	0.316716	0.132	0.12	1	mg-TAM 2	All other cells	ND1_7.Neftel_2019_10x Myeloid_cells	0.293773	0.186879	0.1	1000
LINC01094	long intergenic non-protein coding RNA 1094 [Source:HGNC Symbol;Acc:HGNC:49219]	0.0178856	0.270109	0.442	0.409	1	mg-TAM 2	All other cells	ND1_7.Neftel_2019_10x Myeloid_cells	1.28406	0.956451	0.1	1000
HK2	hexokinase 2 [Source:HGNC Symbol;Acc:HGNC:4923]	0.0183803	-0.444742	0.119	0.162	1	mg-TAM 2	All other cells	ND1_7.Neftel_2019_10x Myeloid_cells	0.25604	0.455453	0.1	1000
UXS1	UDP-glucuronate decarboxylase 1 [Source:HGNC Symbol;Acc:HGNC:17729]	0.018663	0.318324	0.121	0.115	1	mg-TAM 2	All other cells	ND1_7.Neftel_2019_10x Myeloid_cells	0.266993	0.166939	0.1	1000
SYNGR1	synaptogyrin 1 [Source:HGNC Symbol;Acc:HGNC:11498]	0.0188816	0.323799	0.187	0.161	1	mg-TAM 2	All other cells	ND1_7.Neftel_2019_10x Myeloid_cells	0.42124	0.277063	0.1	1000
MEST	mesoderm specific transcript [Source:HGNC Symbol;Acc:HGNC:7028]	0.0190192	0.376438	0.118	0.09	1	mg-TAM 2	All other cells	ND1_7.Neftel_2019_10x Myeloid_cells	0.251051	0.140927	0.1	1000
ZNF846	zinc finger protein 846 [Source:HGNC Symbol;Acc:HGNC:27260]	0.0192831	0.273325	0.13	0.105	1	mg-TAM 2	All other cells	ND1_7.Neftel_2019_10x Myeloid_cells	0.271205	0.182429	0.1	1000
CABIN1	calcineurin binding protein 1 [Source:HGNC Symbol;Acc:HGNC:24187]	0.0194574	0.453845	0.179	0.134	1	mg-TAM 2	All other cells	ND1_7.Neftel_2019_10x Myeloid_cells	0.399296	0.217143	0.1	1000
PMEPA1	prostate transmembrane protein, androgen induced 1 [Source:HGNC Symbol;Acc:HGNC:14107]	0.019673	0.385975	0.16	0.129	1	mg-TAM 2	All other cells	ND1_7.Neftel_2019_10x Myeloid_cells	0.361911	0.214001	0.1	1000
THUMPD3-AS1	THUMPD3 antisense RNA 1 [Source:HGNC Symbol;Acc:HGNC:44478]	0.0204677	0.425407	0.168	0.133	1	mg-TAM 2	All other cells	ND1_7.Neftel_2019_10x Myeloid_cells	0.408596	0.23237	0.1	1000
TRIM13	tripartite motif containing 13 [Source:HGNC Symbol;Acc:HGNC:9976]	0.0210997	0.316939	0.157	0.13	1	mg-TAM 2	All other cells	ND1_7.Neftel_2019_10x Myeloid_cells	0.340562	0.220895	0.1	1000
CCDC92	coiled-coil domain containing 92 [Source:HGNC Symbol;Acc:HGNC:29563]	0.0214315	0.376109	0.101	0.078	1	mg-TAM 2	All other cells	ND1_7.Neftel_2019_10x Myeloid_cells	0.211021	0.113524	0.1	1000
SNAP23	synaptosome associated protein 23 [Source:HGNC Symbol;Acc:HGNC:11131]	0.0227427	0.260682	0.324	0.318	1	mg-TAM 2	All other cells	ND1_7.Neftel_2019_10x Myeloid_cells	0.824623	0.612446	0.1	1000
DPH5	diphthamide biosynthesis 5 [Source:HGNC Symbol;Acc:HGNC:24270]	0.0240017	0.284023	0.114	0.1	1	mg-TAM 2	All other cells	ND1_7.Neftel_2019_10x Myeloid_cells	0.235654	0.152663	0.1	1000
ZNF652	zinc finger protein 652 [Source:HGNC Symbol;Acc:HGNC:29147]	0.0247557	0.43439	0.135	0.102	1	mg-TAM 2	All other cells	ND1_7.Neftel_2019_10x Myeloid_cells	0.300239	0.159219	0.1	1000
TBCC	tubulin folding cofactor C [Source:HGNC Symbol;Acc:HGNC:11580]	0.0252059	0.451543	0.132	0.099	1	mg-TAM 2	All other cells	ND1_7.Neftel_2019_10x Myeloid_cells	0.297862	0.153297	0.1	1000
RHOB	ras homolog family member B [Source:HGNC Symbol;Acc:HGNC:668]	0.0255682	-0.351134	0.655	0.681	1	mg-TAM 2	All other cells	ND1_7.Neftel_2019_10x Myeloid_cells	7.54376	10.7593	0.1	1000
HDAC9	histone deacetylase 9 [Source:HGNC Symbol;Acc:HGNC:14065]	0.0256721	0.337612	0.137	0.107	1	mg-TAM 2	All other cells	ND1_7.Neftel_2019_10x Myeloid_cells	0.301884	0.186733	0.1	1000
ZNF688	zinc finger protein 688 [Source:HGNC Symbol;Acc:HGNC:30489]	0.0266377	0.261639	0.116	0.117	1	mg-TAM 2	All other cells	ND1_7.Neftel_2019_10x Myeloid_cells	0.248011	0.167895	0.1	1000
S100B	S100 calcium binding protein B [Source:HGNC Symbol;Acc:HGNC:10500]	0.0266888	-0.403321	0.241	0.304	1	mg-TAM 2	All other cells	ND1_7.Neftel_2019_10x Myeloid_cells	0.61727	0.9736	0.1	1000
HPS4	HPS4 biogenesis of lysosomal organelles complex 3 subunit 2 [Source:HGNC Symbol;Acc:HGNC:15844]	0.026963	0.327053	0.156	0.131	1	mg-TAM 2	All other cells	ND1_7.Neftel_2019_10x Myeloid_cells	0.360845	0.232291	0.1	1000
NKTR	natural killer cell triggering receptor [Source:HGNC Symbol;Acc:HGNC:7833]	0.0280194	0.349842	0.258	0.228	1	mg-TAM 2	All other cells	ND1_7.Neftel_2019_10x Myeloid_cells	0.642773	0.423506	0.1	1000
ADCK2	aarF domain containing kinase 2 [Source:HGNC Symbol;Acc:HGNC:19039]	0.0287415	0.41495	0.209	0.176	1	mg-TAM 2	All other cells	ND1_7.Neftel_2019_10x Myeloid_cells	0.476736	0.280861	0.1	1000
DEF6	DEF6 guanine nucleotide exchange factor [Source:HGNC Symbol;Acc:HGNC:2760]	0.0298464	0.284449	0.257	0.251	1	mg-TAM 2	All other cells	ND1_7.Neftel_2019_10x Myeloid_cells	0.598592	0.425641	0.1	1000
HP1BP3	heterochromatin protein 1 binding protein 3 [Source:HGNC Symbol;Acc:HGNC:24973]	0.0300931	0.259988	0.358	0.355	1	mg-TAM 2	All other cells	ND1_7.Neftel_2019_10x Myeloid_cells	0.915892	0.683314	0.1	1000
FAR2	fatty acyl-CoA reductase 2 [Source:HGNC Symbol;Acc:HGNC:25531]	0.0304	0.408801	0.139	0.108	1	mg-TAM 2	All other cells	ND1_7.Neftel_2019_10x Myeloid_cells	0.3096	0.172157	0.1	1000
ARHGAP15	Rho GTPase activating protein 15 [Source:HGNC Symbol;Acc:HGNC:21030]	0.0306911	0.328376	0.261	0.241	1	mg-TAM 2	All other cells	ND1_7.Neftel_2019_10x Myeloid_cells	0.619386	0.418024	0.1	1000
FAM172A	family with sequence similarity 172 member A [Source:HGNC Symbol;Acc:HGNC:25365]	0.0311721	0.330894	0.108	0.093	1	mg-TAM 2	All other cells	ND1_7.Neftel_2019_10x Myeloid_cells	0.23875	0.143317	0.1	1000
MGME1	mitochondrial genome maintenance exonuclease 1 [Source:HGNC Symbol;Acc:HGNC:16205]	0.0319263	0.275793	0.106	0.104	1	mg-TAM 2	All other cells	ND1_7.Neftel_2019_10x Myeloid_cells	0.22324	0.145329	0.1	1000
HSPA1A	heat shock protein family A (Hsp70) member 1A [Source:HGNC Symbol;Acc:HGNC:5232]	0.0359921	-0.410497	0.458	0.532	1	mg-TAM 2	All other cells	ND1_7.Neftel_2019_10x Myeloid_cells	10.0895	15.2614	0.1	1000
EGR3	early growth response 3 [Source:HGNC Symbol;Acc:HGNC:3240]	0.0365958	-0.325528	0.156	0.219	1	mg-TAM 2	All other cells	ND1_7.Neftel_2019_10x Myeloid_cells	0.419005	0.618698	0.1	1000
DNAJC10	DnaJ heat shock protein family (Hsp40) member C10 [Source:HGNC Symbol;Acc:HGNC:24637]	0.0368919	0.315676	0.17	0.165	1	mg-TAM 2	All other cells	ND1_7.Neftel_2019_10x Myeloid_cells	0.388794	0.256475	0.1	1000
NUP107	nucleoporin 107 [Source:HGNC Symbol;Acc:HGNC:29914]	0.0372208	0.324497	0.106	0.094	1	mg-TAM 2	All other cells	ND1_7.Neftel_2019_10x Myeloid_cells	0.238334	0.144578	0.1	1000
ZNF106	zinc finger protein 106 [Source:HGNC Symbol;Acc:HGNC:12886]	0.0380593	0.285873	0.328	0.321	1	mg-TAM 2	All other cells	ND1_7.Neftel_2019_10x Myeloid_cells	0.843715	0.609067	0.1	1000
SERTAD2	SERTA domain containing 2 [Source:HGNC Symbol;Acc:HGNC:30784]	0.038828	0.261436	0.102	0.093	1	mg-TAM 2	All other cells	ND1_7.Neftel_2019_10x Myeloid_cells	0.230633	0.15457	0.1	1000
ACAA2	acetyl-CoA acyltransferase 2 [Source:HGNC Symbol;Acc:HGNC:83]	0.0390831	0.270259	0.301	0.282	1	mg-TAM 2	All other cells	ND1_7.Neftel_2019_10x Myeloid_cells	0.713525	0.520867	0.1	1000
RICTOR	RPTOR independent companion of MTOR complex 2 [Source:HGNC Symbol;Acc:HGNC:28611]	0.0394553	0.257272	0.148	0.134	1	mg-TAM 2	All other cells	ND1_7.Neftel_2019_10x Myeloid_cells	0.339628	0.239902	0.1	1000
CCL3	C-C motif chemokine ligand 3 [Source:HGNC Symbol;Acc:HGNC:10627]	0.0406485	-0.469363	0.786	0.758	1	mg-TAM 2	All other cells	ND1_7.Neftel_2019_10x Myeloid_cells	28.5029	45.6353	0.1	1000
GRAMD1A	GRAM domain containing 1A [Source:HGNC Symbol;Acc:HGNC:29305]	0.0414056	0.294041	0.212	0.204	1	mg-TAM 2	All other cells	ND1_7.Neftel_2019_10x Myeloid_cells	0.485367	0.336242	0.1	1000
SLC9A9	solute carrier family 9 member A9 [Source:HGNC Symbol;Acc:HGNC:20653]	0.0417855	0.415018	0.201	0.166	1	mg-TAM 2	All other cells	ND1_7.Neftel_2019_10x Myeloid_cells	0.500861	0.296765	0.1	1000
OSBPL1A	oxysterol binding protein like 1A [Source:HGNC Symbol;Acc:HGNC:16398]	0.0421505	0.329664	0.163	0.141	1	mg-TAM 2	All other cells	ND1_7.Neftel_2019_10x Myeloid_cells	0.358668	0.229858	0.1	1000
ARID4A	AT-rich interaction domain 4A [Source:HGNC Symbol;Acc:HGNC:9885]	0.0424201	0.320399	0.22	0.201	1	mg-TAM 2	All other cells	ND1_7.Neftel_2019_10x Myeloid_cells	0.515169	0.346526	0.1	1000
C6orf226	chromosome 6 open reading frame 226 [Source:HGNC Symbol;Acc:HGNC:34431]	0.0424675	0.307376	0.162	0.143	1	mg-TAM 2	All other cells	ND1_7.Neftel_2019_10x Myeloid_cells	0.342111	0.225117	0.1	1000
ZNF22	zinc finger protein 22 [Source:HGNC Symbol;Acc:HGNC:13012]	0.044215	0.282786	0.214	0.208	1	mg-TAM 2	All other cells	ND1_7.Neftel_2019_10x Myeloid_cells	0.476269	0.334323	0.1	1000
IFFO1	intermediate filament family orphan 1 [Source:HGNC Symbol;Acc:HGNC:24970]	0.0444858	0.355358	0.156	0.139	1	mg-TAM 2	All other cells	ND1_7.Neftel_2019_10x Myeloid_cells	0.362718	0.224329	0.1	1000
OSBPL11	oxysterol binding protein like 11 [Source:HGNC Symbol;Acc:HGNC:16397]	0.0447513	0.307634	0.117	0.104	1	mg-TAM 2	All other cells	ND1_7.Neftel_2019_10x Myeloid_cells	0.255454	0.161324	0.1	1000
SDAD1	SDA1 domain containing 1 [Source:HGNC Symbol;Acc:HGNC:25537]	0.0455869	0.253007	0.151	0.153	1	mg-TAM 2	All other cells	ND1_7.Neftel_2019_10x Myeloid_cells	0.329648	0.233606	0.1	1000
CTBP2	C-terminal binding protein 2 [Source:HGNC Symbol;Acc:HGNC:2495]	0.0462531	0.321343	0.153	0.134	1	mg-TAM 2	All other cells	ND1_7.Neftel_2019_10x Myeloid_cells	0.327328	0.209887	0.1	1000
TERF2IP	TERF2 interacting protein [Source:HGNC Symbol;Acc:HGNC:19246]	0.047505	0.260982	0.312	0.317	1	mg-TAM 2	All other cells	ND1_7.Neftel_2019_10x Myeloid_cells	0.760527	0.56286	0.1	1000
SLC8A1	solute carrier family 8 member A1 [Source:HGNC Symbol;Acc:HGNC:11068]	0.0476681	0.250689	0.333	0.327	1	mg-TAM 2	All other cells	ND1_7.Neftel_2019_10x Myeloid_cells	0.878248	0.661336	0.1	1000
CERS4	ceramide synthase 4 [Source:HGNC Symbol;Acc:HGNC:23747]	0.0500616	0.305784	0.113	0.1	1	mg-TAM 2	All other cells	ND1_7.Neftel_2019_10x Myeloid_cells	0.237245	0.148396	0.1	1000
SRPRA	SRP receptor subunit alpha [Source:HGNC Symbol;Acc:HGNC:11307]	0.0500846	0.298596	0.2	0.193	1	mg-TAM 2	All other cells	ND1_7.Neftel_2019_10x Myeloid_cells	0.466282	0.320102	0.1	1000
SLC40A1	solute carrier family 40 member 1 [Source:HGNC Symbol;Acc:HGNC:10909]	0.0503358	-0.316765	0.142	0.188	1	mg-TAM 2	All other cells	ND1_7.Neftel_2019_10x Myeloid_cells	0.339867	0.503797	0.1	1000
SNW1	SNW domain containing 1 [Source:HGNC Symbol;Acc:HGNC:16696]	0.0506255	0.294404	0.286	0.279	1	mg-TAM 2	All other cells	ND1_7.Neftel_2019_10x Myeloid_cells	0.693344	0.491021	0.1	1000
RCN2	reticulocalbin 2 [Source:HGNC Symbol;Acc:HGNC:9935]	0.0513575	0.2504	0.214	0.225	1	mg-TAM 2	All other cells	ND1_7.Neftel_2019_10x Myeloid_cells	0.470788	0.344353	0.1	1000
CEPT1	choline/ethanolamine phosphotransferase 1 [Source:HGNC Symbol;Acc:HGNC:24289]	0.0514345	0.298249	0.123	0.114	1	mg-TAM 2	All other cells	ND1_7.Neftel_2019_10x Myeloid_cells	0.271868	0.17597	0.1	1000
RTTN	rotatin [Source:HGNC Symbol;Acc:HGNC:18654]	0.0514804	0.485184	0.108	0.067	1	mg-TAM 2	All other cells	ND1_7.Neftel_2019_10x Myeloid_cells	0.244949	0.112345	0.1	1000
PLEKHA3	pleckstrin homology domain containing A3 [Source:HGNC Symbol;Acc:HGNC:14338]	0.052253	0.255957	0.123	0.12	1	mg-TAM 2	All other cells	ND1_7.Neftel_2019_10x Myeloid_cells	0.252778	0.173112	0.1	1000
KLHL5	kelch like family member 5 [Source:HGNC Symbol;Acc:HGNC:6356]	0.0526105	0.291764	0.197	0.195	1	mg-TAM 2	All other cells	ND1_7.Neftel_2019_10x Myeloid_cells	0.453441	0.31339	0.1	1000
PIGBOS1	PIGB opposite strand 1 [Source:HGNC Symbol;Acc:HGNC:50696]	0.0534579	0.34305	0.166	0.144	1	mg-TAM 2	All other cells	ND1_7.Neftel_2019_10x Myeloid_cells	0.347919	0.217845	0.1	1000
GSTM4	glutathione S-transferase mu 4 [Source:HGNC Symbol;Acc:HGNC:4636]	0.0539336	0.278394	0.262	0.244	1	mg-TAM 2	All other cells	ND1_7.Neftel_2019_10x Myeloid_cells	0.634183	0.455775	0.1	1000
SEMA4D	semaphorin 4D [Source:HGNC Symbol;Acc:HGNC:10732]	0.0542194	0.451819	0.187	0.141	1	mg-TAM 2	All other cells	ND1_7.Neftel_2019_10x Myeloid_cells	0.451916	0.251278	0.1	1000
CDKN2A	cyclin dependent kinase inhibitor 2A [Source:HGNC Symbol;Acc:HGNC:1787]	0.0560947	0.273349	0.175	0.161	1	mg-TAM 2	All other cells	ND1_7.Neftel_2019_10x Myeloid_cells	0.370023	0.257607	0.1	1000
CTSF	cathepsin F [Source:HGNC Symbol;Acc:HGNC:2531]	0.0570228	0.341088	0.159	0.135	1	mg-TAM 2	All other cells	ND1_7.Neftel_2019_10x Myeloid_cells	0.335721	0.209796	0.1	1000
SYT17	synaptotagmin 17 [Source:HGNC Symbol;Acc:HGNC:24119]	0.0575421	0.317603	0.104	0.087	1	mg-TAM 2	All other cells	ND1_7.Neftel_2019_10x Myeloid_cells	0.22274	0.13492	0.1	1000
TMEM80	transmembrane protein 80 [Source:HGNC Symbol;Acc:HGNC:27453]	0.0577211	0.352397	0.102	0.076	1	mg-TAM 2	All other cells	ND1_7.Neftel_2019_10x Myeloid_cells	0.212979	0.120025	0.1	1000
ASCC2	activating signal cointegrator 1 complex subunit 2 [Source:HGNC Symbol;Acc:HGNC:24103]	0.0588874	0.268069	0.2	0.207	1	mg-TAM 2	All other cells	ND1_7.Neftel_2019_10x Myeloid_cells	0.459898	0.328241	0.1	1000
ZRANB2	zinc finger RANBP2-type containing 2 [Source:HGNC Symbol;Acc:HGNC:13058]	0.0605035	0.423359	0.27	0.232	1	mg-TAM 2	All other cells	ND1_7.Neftel_2019_10x Myeloid_cells	0.697924	0.422515	0.1	1000
KLHDC2	kelch domain containing 2 [Source:HGNC Symbol;Acc:HGNC:20231]	0.0607504	0.329756	0.188	0.167	1	mg-TAM 2	All other cells	ND1_7.Neftel_2019_10x Myeloid_cells	0.400271	0.259744	0.1	1000
LYSMD2	LysM domain containing 2 [Source:HGNC Symbol;Acc:HGNC:28571]	0.0611467	0.308003	0.312	0.295	1	mg-TAM 2	All other cells	ND1_7.Neftel_2019_10x Myeloid_cells	0.724017	0.50558	0.1	1000
FGD3	FYVE, RhoGEF and PH domain containing 3 [Source:HGNC Symbol;Acc:HGNC:16027]	0.0645538	0.250144	0.106	0.093	1	mg-TAM 2	All other cells	ND1_7.Neftel_2019_10x Myeloid_cells	0.21566	0.145801	0.1	1000
TBC1D4	TBC1 domain family member 4 [Source:HGNC Symbol;Acc:HGNC:19165]	0.0649976	0.322645	0.158	0.133	1	mg-TAM 2	All other cells	ND1_7.Neftel_2019_10x Myeloid_cells	0.340475	0.219006	0.1	1000
BRIX1	biogenesis of ribosomes BRX1 [Source:HGNC Symbol;Acc:HGNC:24170]	0.0650027	0.255831	0.129	0.118	1	mg-TAM 2	All other cells	ND1_7.Neftel_2019_10x Myeloid_cells	0.268724	0.185493	0.1	1000
LYRM4	LYR motif containing 4 [Source:HGNC Symbol;Acc:HGNC:21365]	0.0650986	0.301925	0.263	0.243	1	mg-TAM 2	All other cells	ND1_7.Neftel_2019_10x Myeloid_cells	0.589364	0.409711	0.1	1000
IL17RA	interleukin 17 receptor A [Source:HGNC Symbol;Acc:HGNC:5985]	0.0663224	0.369744	0.368	0.327	1	mg-TAM 2	All other cells	ND1_7.Neftel_2019_10x Myeloid_cells	0.966349	0.636753	0.1	1000
ING4	inhibitor of growth family member 4 [Source:HGNC Symbol;Acc:HGNC:19423]	0.0663264	0.327571	0.112	0.099	1	mg-TAM 2	All other cells	ND1_7.Neftel_2019_10x Myeloid_cells	0.244231	0.148078	0.1	1000
CEBPZOS	CEBPZ opposite strand [Source:HGNC Symbol;Acc:HGNC:49288]	0.0682633	0.290861	0.148	0.135	1	mg-TAM 2	All other cells	ND1_7.Neftel_2019_10x Myeloid_cells	0.308939	0.205731	0.1	1000
SMYD4	SET and MYND domain containing 4 [Source:HGNC Symbol;Acc:HGNC:21067]	0.0684834	0.336924	0.117	0.095	1	mg-TAM 2	All other cells	ND1_7.Neftel_2019_10x Myeloid_cells	0.269909	0.164101	0.1	1000
MPZL1	myelin protein zero like 1 [Source:HGNC Symbol;Acc:HGNC:7226]	0.07154	0.317243	0.238	0.236	1	mg-TAM 2	All other cells	ND1_7.Neftel_2019_10x Myeloid_cells	0.585429	0.399097	0.1	1000
UPF2	UPF2 regulator of nonsense mediated mRNA decay [Source:HGNC Symbol;Acc:HGNC:17854]	0.071591	0.272323	0.202	0.193	1	mg-TAM 2	All other cells	ND1_7.Neftel_2019_10x Myeloid_cells	0.50413	0.36011	0.1	1000
MRPS18B	mitochondrial ribosomal protein S18B [Source:HGNC Symbol;Acc:HGNC:14516]	0.0715936	0.304368	0.299	0.295	1	mg-TAM 2	All other cells	ND1_7.Neftel_2019_10x Myeloid_cells	0.72865	0.511203	0.1	1000
UBE2E2	ubiquitin conjugating enzyme E2 E2 [Source:HGNC Symbol;Acc:HGNC:12478]	0.0716548	0.280521	0.315	0.305	1	mg-TAM 2	All other cells	ND1_7.Neftel_2019_10x Myeloid_cells	0.756051	0.546652	0.1	1000
DDX19B	DEAD-box helicase 19B [Source:HGNC Symbol;Acc:HGNC:2742]	0.0730316	0.327844	0.161	0.143	1	mg-TAM 2	All other cells	ND1_7.Neftel_2019_10x Myeloid_cells	0.357947	0.22994	0.1	1000
STXBP3	syntaxin binding protein 3 [Source:HGNC Symbol;Acc:HGNC:11446]	0.0736078	0.303372	0.167	0.159	1	mg-TAM 2	All other cells	ND1_7.Neftel_2019_10x Myeloid_cells	0.37221	0.248644	0.1	1000
SLC25A45	solute carrier family 25 member 45 [Source:HGNC Symbol;Acc:HGNC:27442]	0.0749159	0.404568	0.103	0.083	1	mg-TAM 2	All other cells	ND1_7.Neftel_2019_10x Myeloid_cells	0.251378	0.134463	0.1	1000
C12orf76	chromosome 12 open reading frame 76 [Source:HGNC Symbol;Acc:HGNC:33790]	0.0769287	0.269998	0.112	0.099	1	mg-TAM 2	All other cells	ND1_7.Neftel_2019_10x Myeloid_cells	0.243249	0.16203	0.1	1000
C3orf38	chromosome 3 open reading frame 38 [Source:HGNC Symbol;Acc:HGNC:28384]	0.077014	0.346657	0.151	0.13	1	mg-TAM 2	All other cells	ND1_7.Neftel_2019_10x Myeloid_cells	0.33908	0.210451	0.1	1000
TAF6	TATA-box binding protein associated factor 6 [Source:HGNC Symbol;Acc:HGNC:11540]	0.0772447	0.289537	0.125	0.114	1	mg-TAM 2	All other cells	ND1_7.Neftel_2019_10x Myeloid_cells	0.259378	0.169034	0.1	1000
FAM135A	family with sequence similarity 135 member A [Source:HGNC Symbol;Acc:HGNC:21084]	0.0788263	0.316145	0.136	0.127	1	mg-TAM 2	All other cells	ND1_7.Neftel_2019_10x Myeloid_cells	0.317064	0.204021	0.1	1000
C2orf74	chromosome 2 open reading frame 74 [Source:HGNC Symbol;Acc:HGNC:34439]	0.0798098	0.269316	0.155	0.133	1	mg-TAM 2	All other cells	ND1_7.Neftel_2019_10x Myeloid_cells	0.327053	0.226227	0.1	1000
BSDC1	BSD domain containing 1 [Source:HGNC Symbol;Acc:HGNC:25501]	0.0810315	0.259329	0.13	0.126	1	mg-TAM 2	All other cells	ND1_7.Neftel_2019_10x Myeloid_cells	0.297162	0.206438	0.1	1000
POLK	DNA polymerase kappa [Source:HGNC Symbol;Acc:HGNC:9183]	0.0818153	0.30595	0.15	0.135	1	mg-TAM 2	All other cells	ND1_7.Neftel_2019_10x Myeloid_cells	0.341151	0.224874	0.1	1000
CHD6	chromodomain helicase DNA binding protein 6 [Source:HGNC Symbol;Acc:HGNC:19057]	0.082656	0.260699	0.113	0.114	1	mg-TAM 2	All other cells	ND1_7.Neftel_2019_10x Myeloid_cells	0.259588	0.177067	0.1	1000
TAPBPL	TAP binding protein like [Source:HGNC Symbol;Acc:HGNC:30683]	0.0847541	0.27838	0.171	0.161	1	mg-TAM 2	All other cells	ND1_7.Neftel_2019_10x Myeloid_cells	0.367005	0.253527	0.1	1000
MAST3	microtubule associated serine/threonine kinase 3 [Source:HGNC Symbol;Acc:HGNC:19036]	0.0851603	0.370622	0.137	0.11	1	mg-TAM 2	All other cells	ND1_7.Neftel_2019_10x Myeloid_cells	0.297163	0.174164	0.1	1000
SLC39A10	solute carrier family 39 member 10 [Source:HGNC Symbol;Acc:HGNC:20861]	0.0852833	0.396484	0.17	0.141	1	mg-TAM 2	All other cells	ND1_7.Neftel_2019_10x Myeloid_cells	0.411092	0.243802	0.1	1000
LRRC8C	leucine rich repeat containing 8 VRAC subunit C [Source:HGNC Symbol;Acc:HGNC:25075]	0.0856007	0.414345	0.16	0.131	1	mg-TAM 2	All other cells	ND1_7.Neftel_2019_10x Myeloid_cells	0.357183	0.202094	0.1	1000
MORC3	MORC family CW-type zinc finger 3 [Source:HGNC Symbol;Acc:HGNC:23572]	0.0877874	0.256216	0.136	0.138	1	mg-TAM 2	All other cells	ND1_7.Neftel_2019_10x Myeloid_cells	0.307842	0.215659	0.1	1000
STX4	syntaxin 4 [Source:HGNC Symbol;Acc:HGNC:11439]	0.0879143	-0.255164	0.223	0.325	1	mg-TAM 2	All other cells	ND1_7.Neftel_2019_10x Myeloid_cells	0.532182	0.71594	0.1	1000
CCDC186	coiled-coil domain containing 186 [Source:HGNC Symbol;Acc:HGNC:24349]	0.0884074	0.27457	0.107	0.093	1	mg-TAM 2	All other cells	ND1_7.Neftel_2019_10x Myeloid_cells	0.214458	0.138956	0.1	1000
PPP6R2	protein phosphatase 6 regulatory subunit 2 [Source:HGNC Symbol;Acc:HGNC:19253]	0.0906198	0.330995	0.159	0.144	1	mg-TAM 2	All other cells	ND1_7.Neftel_2019_10x Myeloid_cells	0.35973	0.230182	0.1	1000
TRIP11	thyroid hormone receptor interactor 11 [Source:HGNC Symbol;Acc:HGNC:12305]	0.0916022	0.27979	0.132	0.13	1	mg-TAM 2	All other cells	ND1_7.Neftel_2019_10x Myeloid_cells	0.298002	0.200867	0.1	1000
CNOT2	CCR4-NOT transcription complex subunit 2 [Source:HGNC Symbol;Acc:HGNC:7878]	0.0925072	0.255018	0.215	0.212	1	mg-TAM 2	All other cells	ND1_7.Neftel_2019_10x Myeloid_cells	0.477181	0.347259	0.1	1000
ZDHHC24	zinc finger DHHC-type containing 24 [Source:HGNC Symbol;Acc:HGNC:27387]	0.0927232	0.306758	0.237	0.241	1	mg-TAM 2	All other cells	ND1_7.Neftel_2019_10x Myeloid_cells	0.544216	0.374032	0.1	1000
UFL1	UFM1 specific ligase 1 [Source:HGNC Symbol;Acc:HGNC:23039]	0.0939571	0.51925	0.199	0.186	1	mg-TAM 2	All other cells	ND1_7.Neftel_2019_10x Myeloid_cells	0.571649	0.299609	0.1	1000
MPHOSPH10	M-phase phosphoprotein 10 [Source:HGNC Symbol;Acc:HGNC:7213]	0.097764	0.356016	0.143	0.128	1	mg-TAM 2	All other cells	ND1_7.Neftel_2019_10x Myeloid_cells	0.325193	0.197832	0.1	1000
SELL	selectin L [Source:HGNC Symbol;Acc:HGNC:10720]	0.0999797	0.342701	0.149	0.115	1	mg-TAM 2	All other cells	ND1_7.Neftel_2019_10x Myeloid_cells	0.333077	0.20742	0.1	1000
TGS1	trimethylguanosine synthase 1 [Source:HGNC Symbol;Acc:HGNC:17843]	0.105435	0.268234	0.117	0.118	1	mg-TAM 2	All other cells	ND1_7.Neftel_2019_10x Myeloid_cells	0.267978	0.181404	0.1	1000
DAAM1	dishevelled associated activator of morphogenesis 1 [Source:HGNC Symbol;Acc:HGNC:18142]	0.105836	0.390178	0.121	0.107	1	mg-TAM 2	All other cells	ND1_7.Neftel_2019_10x Myeloid_cells	0.305163	0.17427	0.1	1000
BACH1	BTB domain and CNC homolog 1 [Source:HGNC Symbol;Acc:HGNC:935]	0.106243	0.325752	0.227	0.212	1	mg-TAM 2	All other cells	ND1_7.Neftel_2019_10x Myeloid_cells	0.548442	0.368165	0.1	1000
ZMYND15	zinc finger MYND-type containing 15 [Source:HGNC Symbol;Acc:HGNC:20997]	0.106302	0.274146	0.112	0.102	1	mg-TAM 2	All other cells	ND1_7.Neftel_2019_10x Myeloid_cells	0.232589	0.152841	0.1	1000
WAPL	WAPL cohesin release factor [Source:HGNC Symbol;Acc:HGNC:23293]	0.108167	0.284362	0.223	0.203	1	mg-TAM 2	All other cells	ND1_7.Neftel_2019_10x Myeloid_cells	0.480153	0.336562	0.1	1000
MED11	mediator complex subunit 11 [Source:HGNC Symbol;Acc:HGNC:32687]	0.109085	0.366343	0.195	0.175	1	mg-TAM 2	All other cells	ND1_7.Neftel_2019_10x Myeloid_cells	0.453147	0.283477	0.1	1000
PLA2G15	phospholipase A2 group XV [Source:HGNC Symbol;Acc:HGNC:17163]	0.110816	0.319285	0.273	0.254	1	mg-TAM 2	All other cells	ND1_7.Neftel_2019_10x Myeloid_cells	0.682015	0.468266	0.1	1000
GLT8D1	glycosyltransferase 8 domain containing 1 [Source:HGNC Symbol;Acc:HGNC:24870]	0.113829	0.290835	0.132	0.129	1	mg-TAM 2	All other cells	ND1_7.Neftel_2019_10x Myeloid_cells	0.283642	0.186826	0.1	1000
XPC	XPC complex subunit, DNA damage recognition and repair factor [Source:HGNC Symbol;Acc:HGNC:12816]	0.115832	0.287323	0.126	0.119	1	mg-TAM 2	All other cells	ND1_7.Neftel_2019_10x Myeloid_cells	0.283919	0.188043	0.1	1000
DNAJB12	DnaJ heat shock protein family (Hsp40) member B12 [Source:HGNC Symbol;Acc:HGNC:14891]	0.117493	0.268221	0.239	0.233	1	mg-TAM 2	All other cells	ND1_7.Neftel_2019_10x Myeloid_cells	0.545617	0.393728	0.1	1000
GOLGB1	golgin B1 [Source:HGNC Symbol;Acc:HGNC:4429]	0.119068	0.34063	0.27	0.254	1	mg-TAM 2	All other cells	ND1_7.Neftel_2019_10x Myeloid_cells	0.69058	0.462357	0.1	1000
RBM6	RNA binding motif protein 6 [Source:HGNC Symbol;Acc:HGNC:9903]	0.122337	0.307206	0.226	0.206	1	mg-TAM 2	All other cells	ND1_7.Neftel_2019_10x Myeloid_cells	0.549825	0.377946	0.1	1000
EML4	EMAP like 4 [Source:HGNC Symbol;Acc:HGNC:1316]	0.122469	0.2884	0.292	0.277	1	mg-TAM 2	All other cells	ND1_7.Neftel_2019_10x Myeloid_cells	0.723299	0.517031	0.1	1000
DIAPH2	diaphanous related formin 2 [Source:HGNC Symbol;Acc:HGNC:2877]	0.124335	0.353979	0.193	0.166	1	mg-TAM 2	All other cells	ND1_7.Neftel_2019_10x Myeloid_cells	0.431469	0.273033	0.1	1000
PYM1	PYM homolog 1, exon junction complex associated factor [Source:HGNC Symbol;Acc:HGNC:30258]	0.124757	0.292959	0.181	0.17	1	mg-TAM 2	All other cells	ND1_7.Neftel_2019_10x Myeloid_cells	0.383078	0.260401	0.1	1000
TERF1	telomeric repeat binding factor 1 [Source:HGNC Symbol;Acc:HGNC:11728]	0.124844	0.364512	0.161	0.152	1	mg-TAM 2	All other cells	ND1_7.Neftel_2019_10x Myeloid_cells	0.387681	0.238712	0.1	1000
SMC3	structural maintenance of chromosomes 3 [Source:HGNC Symbol;Acc:HGNC:2468]	0.126333	0.287438	0.225	0.222	1	mg-TAM 2	All other cells	ND1_7.Neftel_2019_10x Myeloid_cells	0.52905	0.371902	0.1	1000
SPIDR	scaffold protein involved in DNA repair [Source:HGNC Symbol;Acc:HGNC:28971]	0.128186	0.310607	0.141	0.121	1	mg-TAM 2	All other cells	ND1_7.Neftel_2019_10x Myeloid_cells	0.313452	0.203061	0.1	1000
ZNF32	zinc finger protein 32 [Source:HGNC Symbol;Acc:HGNC:13095]	0.129786	0.252257	0.164	0.165	1	mg-TAM 2	All other cells	ND1_7.Neftel_2019_10x Myeloid_cells	0.343092	0.244303	0.1	1000
C5orf15	chromosome 5 open reading frame 15 [Source:HGNC Symbol;Acc:HGNC:20656]	0.134342	0.357298	0.264	0.239	1	mg-TAM 2	All other cells	ND1_7.Neftel_2019_10x Myeloid_cells	0.637253	0.415756	0.1	1000
PACS2	phosphofurin acidic cluster sorting protein 2 [Source:HGNC Symbol;Acc:HGNC:23794]	0.139712	0.305281	0.122	0.109	1	mg-TAM 2	All other cells	ND1_7.Neftel_2019_10x Myeloid_cells	0.264084	0.168299	0.1	1000
ASH1L	ASH1 like histone lysine methyltransferase [Source:HGNC Symbol;Acc:HGNC:19088]	0.145731	0.253392	0.192	0.2	1	mg-TAM 2	All other cells	ND1_7.Neftel_2019_10x Myeloid_cells	0.466307	0.339547	0.1	1000
CCL3L3	C-C motif chemokine ligand 3 like 3 [Source:HGNC Symbol;Acc:HGNC:30554]	0.146462	-0.822602	0.569	0.543	1	mg-TAM 2	All other cells	ND1_7.Neftel_2019_10x Myeloid_cells	7.91601	18.1478	0.1	1000
DHRS1	dehydrogenase/reductase 1 [Source:HGNC Symbol;Acc:HGNC:16445]	0.146825	0.282758	0.125	0.11	1	mg-TAM 2	All other cells	ND1_7.Neftel_2019_10x Myeloid_cells	0.273829	0.181756	0.1	1000
KLF6	Kruppel like factor 6 [Source:HGNC Symbol;Acc:HGNC:2235]	0.14903	-0.26541	0.81	0.803	1	mg-TAM 2	All other cells	ND1_7.Neftel_2019_10x Myeloid_cells	8.18396	10.702	0.1	1000
ADCY7	adenylate cyclase 7 [Source:HGNC Symbol;Acc:HGNC:238]	0.151557	0.269077	0.189	0.189	1	mg-TAM 2	All other cells	ND1_7.Neftel_2019_10x Myeloid_cells	0.439778	0.312436	0.1	1000
GALT	galactose-1-phosphate uridylyltransferase [Source:HGNC Symbol;Acc:HGNC:4135]	0.151701	0.285753	0.101	0.088	1	mg-TAM 2	All other cells	ND1_7.Neftel_2019_10x Myeloid_cells	0.216145	0.137566	0.1	1000
SYNJ2BP	synaptojanin 2 binding protein [Source:HGNC Symbol;Acc:HGNC:18955]	0.152175	0.334302	0.11	0.099	1	mg-TAM 2	All other cells	ND1_7.Neftel_2019_10x Myeloid_cells	0.246554	0.148076	0.1	1000
SCFD1	sec1 family domain containing 1 [Source:HGNC Symbol;Acc:HGNC:20726]	0.153676	0.251929	0.174	0.178	1	mg-TAM 2	All other cells	ND1_7.Neftel_2019_10x Myeloid_cells	0.388693	0.279861	0.1	1000
SESN1	sestrin 1 [Source:HGNC Symbol;Acc:HGNC:21595]	0.154952	0.299253	0.19	0.171	1	mg-TAM 2	All other cells	ND1_7.Neftel_2019_10x Myeloid_cells	0.449819	0.30762	0.1	1000
TBC1D22A	TBC1 domain family member 22A [Source:HGNC Symbol;Acc:HGNC:1309]	0.155955	0.272002	0.207	0.206	1	mg-TAM 2	All other cells	ND1_7.Neftel_2019_10x Myeloid_cells	0.459308	0.32611	0.1	1000
DR1	down-regulator of transcription 1 [Source:HGNC Symbol;Acc:HGNC:3017]	0.158749	0.321083	0.229	0.223	1	mg-TAM 2	All other cells	ND1_7.Neftel_2019_10x Myeloid_cells	0.517331	0.347789	0.1	1000
GPANK1	G-patch domain and ankyrin repeats 1 [Source:HGNC Symbol;Acc:HGNC:13920]	0.161219	0.268926	0.126	0.119	1	mg-TAM 2	All other cells	ND1_7.Neftel_2019_10x Myeloid_cells	0.272585	0.18473	0.1	1000
BOD1	biorientation of chromosomes in cell division 1 [Source:HGNC Symbol;Acc:HGNC:25114]	0.163392	0.25421	0.105	0.103	1	mg-TAM 2	All other cells	ND1_7.Neftel_2019_10x Myeloid_cells	0.220623	0.148653	0.1	1000
HACD3	3-hydroxyacyl-CoA dehydratase 3 [Source:HGNC Symbol;Acc:HGNC:24175]	0.164554	0.365619	0.137	0.123	1	mg-TAM 2	All other cells	ND1_7.Neftel_2019_10x Myeloid_cells	0.319218	0.190839	0.1	1000
USP6NL	USP6 N-terminal like [Source:HGNC Symbol;Acc:HGNC:16858]	0.16486	0.28133	0.131	0.118	1	mg-TAM 2	All other cells	ND1_7.Neftel_2019_10x Myeloid_cells	0.27863	0.185782	0.1	1000
SLC31A2	solute carrier family 31 member 2 [Source:HGNC Symbol;Acc:HGNC:11017]	0.166532	0.253511	0.405	0.407	1	mg-TAM 2	All other cells	ND1_7.Neftel_2019_10x Myeloid_cells	1.23092	0.932885	0.1	1000
MTUS1	microtubule associated scaffold protein 1 [Source:HGNC Symbol;Acc:HGNC:29789]	0.168718	0.40118	0.21	0.17	1	mg-TAM 2	All other cells	ND1_7.Neftel_2019_10x Myeloid_cells	0.504298	0.304596	0.1	1000
SMARCC2	SWI/SNF related, matrix associated, actin dependent regulator of chromatin subfamily c member 2 [Source:HGNC Symbol;Acc:HGNC:11105]	0.172181	0.258586	0.155	0.149	1	mg-TAM 2	All other cells	ND1_7.Neftel_2019_10x Myeloid_cells	0.337739	0.237997	0.1	1000
SRFBP1	serum response factor binding protein 1 [Source:HGNC Symbol;Acc:HGNC:26333]	0.180678	0.307931	0.166	0.153	1	mg-TAM 2	All other cells	ND1_7.Neftel_2019_10x Myeloid_cells	0.370211	0.245589	0.1	1000
ARMCX2	armadillo repeat containing X-linked 2 [Source:HGNC Symbol;Acc:HGNC:16869]	0.180772	0.34636	0.104	0.088	1	mg-TAM 2	All other cells	ND1_7.Neftel_2019_10x Myeloid_cells	0.240219	0.140622	0.1	1000
ELP2	elongator acetyltransferase complex subunit 2 [Source:HGNC Symbol;Acc:HGNC:18248]	0.186249	0.257316	0.129	0.116	1	mg-TAM 2	All other cells	ND1_7.Neftel_2019_10x Myeloid_cells	0.268711	0.185059	0.1	1000
ATF7IP2	activating transcription factor 7 interacting protein 2 [Source:HGNC Symbol;Acc:HGNC:20397]	0.187422	0.307432	0.168	0.15	1	mg-TAM 2	All other cells	ND1_7.Neftel_2019_10x Myeloid_cells	0.392454	0.262118	0.1	1000
PRPF4B	pre-mRNA processing factor 4B [Source:HGNC Symbol;Acc:HGNC:17346]	0.193223	0.321899	0.245	0.24	1	mg-TAM 2	All other cells	ND1_7.Neftel_2019_10x Myeloid_cells	0.618485	0.420738	0.1	1000
MIA3	MIA SH3 domain ER export factor 3 [Source:HGNC Symbol;Acc:HGNC:24008]	0.199279	0.29506	0.183	0.17	1	mg-TAM 2	All other cells	ND1_7.Neftel_2019_10x Myeloid_cells	0.404631	0.275691	0.1	1000
SYNRG	synergin gamma [Source:HGNC Symbol;Acc:HGNC:557]	0.201715	0.275678	0.145	0.148	1	mg-TAM 2	All other cells	ND1_7.Neftel_2019_10x Myeloid_cells	0.334193	0.229577	0.1	1000
DDB2	damage specific DNA binding protein 2 [Source:HGNC Symbol;Acc:HGNC:2718]	0.20189	0.318525	0.138	0.121	1	mg-TAM 2	All other cells	ND1_7.Neftel_2019_10x Myeloid_cells	0.323614	0.208061	0.1	1000
B3GALT4	beta-1,3-galactosyltransferase 4 [Source:HGNC Symbol;Acc:HGNC:919]	0.206231	0.354092	0.126	0.112	1	mg-TAM 2	All other cells	ND1_7.Neftel_2019_10x Myeloid_cells	0.266992	0.157559	0.1	1000
CCNG2	cyclin G2 [Source:HGNC Symbol;Acc:HGNC:1593]	0.208635	0.277287	0.106	0.1	1	mg-TAM 2	All other cells	ND1_7.Neftel_2019_10x Myeloid_cells	0.235967	0.154608	0.1	1000
DNAJC30	DnaJ heat shock protein family (Hsp40) member C30 [Source:HGNC Symbol;Acc:HGNC:16410]	0.210823	0.270981	0.107	0.096	1	mg-TAM 2	All other cells	ND1_7.Neftel_2019_10x Myeloid_cells	0.207287	0.134346	0.1	1000
FFAR4	free fatty acid receptor 4 [Source:HGNC Symbol;Acc:HGNC:19061]	0.212514	0.370885	0.142	0.125	1	mg-TAM 2	All other cells	ND1_7.Neftel_2019_10x Myeloid_cells	0.324813	0.193173	0.1	1000
MPPE1	metallophosphoesterase 1 [Source:HGNC Symbol;Acc:HGNC:15988]	0.214864	0.326391	0.186	0.17	1	mg-TAM 2	All other cells	ND1_7.Neftel_2019_10x Myeloid_cells	0.419575	0.274885	0.1	1000
ZNF83	zinc finger protein 83 [Source:HGNC Symbol;Acc:HGNC:13158]	0.218357	0.319152	0.101	0.082	1	mg-TAM 2	All other cells	ND1_7.Neftel_2019_10x Myeloid_cells	0.217095	0.130453	0.1	1000
ARHGEF6	Rac/Cdc42 guanine nucleotide exchange factor 6 [Source:HGNC Symbol;Acc:HGNC:685]	0.220438	0.259547	0.204	0.193	1	mg-TAM 2	All other cells	ND1_7.Neftel_2019_10x Myeloid_cells	0.444592	0.320099	0.1	1000
METTL17	methyltransferase like 17 [Source:HGNC Symbol;Acc:HGNC:19280]	0.22568	0.310921	0.138	0.129	1	mg-TAM 2	All other cells	ND1_7.Neftel_2019_10x Myeloid_cells	0.309872	0.200342	0.1	1000
PCM1	pericentriolar material 1 [Source:HGNC Symbol;Acc:HGNC:8727]	0.231198	0.283096	0.282	0.278	1	mg-TAM 2	All other cells	ND1_7.Neftel_2019_10x Myeloid_cells	0.703028	0.505039	0.1	1000
ROGDI	rogdi atypical leucine zipper [Source:HGNC Symbol;Acc:HGNC:29478]	0.231277	0.274407	0.185	0.183	1	mg-TAM 2	All other cells	ND1_7.Neftel_2019_10x Myeloid_cells	0.396957	0.277699	0.1	1000
UNC50	unc-50 inner nuclear membrane RNA binding protein [Source:HGNC Symbol;Acc:HGNC:16046]	0.236981	0.315003	0.238	0.234	1	mg-TAM 2	All other cells	ND1_7.Neftel_2019_10x Myeloid_cells	0.565657	0.385788	0.1	1000
CCDC88B	coiled-coil domain containing 88B [Source:HGNC Symbol;Acc:HGNC:26757]	0.238182	0.304746	0.137	0.119	1	mg-TAM 2	All other cells	ND1_7.Neftel_2019_10x Myeloid_cells	0.30855	0.201228	0.1	1000
TM7SF3	transmembrane 7 superfamily member 3 [Source:HGNC Symbol;Acc:HGNC:23049]	0.239206	0.254072	0.169	0.182	1	mg-TAM 2	All other cells	ND1_7.Neftel_2019_10x Myeloid_cells	0.381324	0.273332	0.1	1000
TMEM86A	transmembrane protein 86A [Source:HGNC Symbol;Acc:HGNC:26890]	0.250286	0.271767	0.145	0.134	1	mg-TAM 2	All other cells	ND1_7.Neftel_2019_10x Myeloid_cells	0.310483	0.212801	0.1	1000
NSD1	nuclear receptor binding SET domain protein 1 [Source:HGNC Symbol;Acc:HGNC:14234]	0.250412	0.300163	0.181	0.175	1	mg-TAM 2	All other cells	ND1_7.Neftel_2019_10x Myeloid_cells	0.435185	0.29641	0.1	1000
KIN	Kin17 DNA and RNA binding protein [Source:HGNC Symbol;Acc:HGNC:6327]	0.253042	0.31342	0.123	0.111	1	mg-TAM 2	All other cells	ND1_7.Neftel_2019_10x Myeloid_cells	0.267048	0.168291	0.1	1000
CEP63	centrosomal protein 63 [Source:HGNC Symbol;Acc:HGNC:25815]	0.254079	0.348265	0.149	0.128	1	mg-TAM 2	All other cells	ND1_7.Neftel_2019_10x Myeloid_cells	0.324546	0.199692	0.1	1000
REST	RE1 silencing transcription factor [Source:HGNC Symbol;Acc:HGNC:9966]	0.256401	0.309009	0.173	0.169	1	mg-TAM 2	All other cells	ND1_7.Neftel_2019_10x Myeloid_cells	0.382624	0.25433	0.1	1000
HSPA1B	heat shock protein family A (Hsp70) member 1B [Source:HGNC Symbol;Acc:HGNC:5233]	0.259423	-0.408978	0.343	0.384	1	mg-TAM 2	All other cells	ND1_7.Neftel_2019_10x Myeloid_cells	4.14786	6.29422	0.1	1000
LNPEP	leucyl and cystinyl aminopeptidase [Source:HGNC Symbol;Acc:HGNC:6656]	0.263196	0.344322	0.207	0.182	1	mg-TAM 2	All other cells	ND1_7.Neftel_2019_10x Myeloid_cells	0.47073	0.304477	0.1	1000
PSIP1	PC4 and SFRS1 interacting protein 1 [Source:HGNC Symbol;Acc:HGNC:9527]	0.267277	0.3252	0.189	0.171	1	mg-TAM 2	All other cells	ND1_7.Neftel_2019_10x Myeloid_cells	0.418522	0.274572	0.1	1000
BROX	BRO1 domain and CAAX motif containing [Source:HGNC Symbol;Acc:HGNC:26512]	0.271279	0.295413	0.25	0.24	1	mg-TAM 2	All other cells	ND1_7.Neftel_2019_10x Myeloid_cells	0.586444	0.410868	0.1	1000
ECI2	enoyl-CoA delta isomerase 2 [Source:HGNC Symbol;Acc:HGNC:14601]	0.274857	0.329186	0.197	0.19	1	mg-TAM 2	All other cells	ND1_7.Neftel_2019_10x Myeloid_cells	0.454106	0.298684	0.1	1000
OTUD6B-AS1	OTUD6B antisense RNA 1 (head to head) [Source:HGNC Symbol;Acc:HGNC:50466]	0.276972	0.281659	0.156	0.147	1	mg-TAM 2	All other cells	ND1_7.Neftel_2019_10x Myeloid_cells	0.351817	0.24091	0.1	1000
RAB29	RAB29, member RAS oncogene family [Source:HGNC Symbol;Acc:HGNC:9789]	0.285875	0.283094	0.161	0.15	1	mg-TAM 2	All other cells	ND1_7.Neftel_2019_10x Myeloid_cells	0.350613	0.239514	0.1	1000
ELK3	ETS transcription factor ELK3 [Source:HGNC Symbol;Acc:HGNC:3325]	0.291536	0.306247	0.147	0.134	1	mg-TAM 2	All other cells	ND1_7.Neftel_2019_10x Myeloid_cells	0.321022	0.209958	0.1	1000
HVCN1	hydrogen voltage gated channel 1 [Source:HGNC Symbol;Acc:HGNC:28240]	0.29422	0.305637	0.189	0.176	1	mg-TAM 2	All other cells	ND1_7.Neftel_2019_10x Myeloid_cells	0.441966	0.299241	0.1	1000
ARV1	ARV1 homolog, fatty acid homeostasis modulator [Source:HGNC Symbol;Acc:HGNC:29561]	0.300126	0.277635	0.109	0.092	1	mg-TAM 2	All other cells	ND1_7.Neftel_2019_10x Myeloid_cells	0.222356	0.144208	0.1	1000
YIPF4	Yip1 domain family member 4 [Source:HGNC Symbol;Acc:HGNC:28145]	0.300411	0.325729	0.259	0.248	1	mg-TAM 2	All other cells	ND1_7.Neftel_2019_10x Myeloid_cells	0.62	0.41984	0.1	1000
KCNQ3	potassium voltage-gated channel subfamily Q member 3 [Source:HGNC Symbol;Acc:HGNC:6297]	0.300997	0.261674	0.153	0.135	1	mg-TAM 2	All other cells	ND1_7.Neftel_2019_10x Myeloid_cells	0.33424	0.234261	0.1	1000
ATP2C1	ATPase secretory pathway Ca2+ transporting 1 [Source:HGNC Symbol;Acc:HGNC:13211]	0.305284	0.314767	0.222	0.213	1	mg-TAM 2	All other cells	ND1_7.Neftel_2019_10x Myeloid_cells	0.528117	0.3585	0.1	1000
ANKRD22	ankyrin repeat domain 22 [Source:HGNC Symbol;Acc:HGNC:28321]	0.306717	0.2563	0.15	0.151	1	mg-TAM 2	All other cells	ND1_7.Neftel_2019_10x Myeloid_cells	0.375944	0.268338	0.1	1000
ZNF580	zinc finger protein 580 [Source:HGNC Symbol;Acc:HGNC:29473]	0.309471	0.265825	0.235	0.236	1	mg-TAM 2	All other cells	ND1_7.Neftel_2019_10x Myeloid_cells	0.516732	0.37277	0.1	1000
ZBTB38	zinc finger and BTB domain containing 38 [Source:HGNC Symbol;Acc:HGNC:26636]	0.311112	0.294625	0.177	0.17	1	mg-TAM 2	All other cells	ND1_7.Neftel_2019_10x Myeloid_cells	0.400025	0.272424	0.1	1000
MXD4	MAX dimerization protein 4 [Source:HGNC Symbol;Acc:HGNC:13906]	0.318573	0.294073	0.187	0.175	1	mg-TAM 2	All other cells	ND1_7.Neftel_2019_10x Myeloid_cells	0.41602	0.28455	0.1	1000
AGPAT5	1-acylglycerol-3-phosphate O-acyltransferase 5 [Source:HGNC Symbol;Acc:HGNC:20886]	0.318954	0.275895	0.101	0.094	1	mg-TAM 2	All other cells	ND1_7.Neftel_2019_10x Myeloid_cells	0.220992	0.143598	0.1	1000
LBR	lamin B receptor [Source:HGNC Symbol;Acc:HGNC:6518]	0.32771	0.267282	0.199	0.201	1	mg-TAM 2	All other cells	ND1_7.Neftel_2019_10x Myeloid_cells	0.45798	0.32711	0.1	1000
EIF4A1	eukaryotic translation initiation factor 4A1 [Source:HGNC Symbol;Acc:HGNC:3282]	0.331842	-0.309236	0.574	0.599	1	mg-TAM 2	All other cells	ND1_7.Neftel_2019_10x Myeloid_cells	2.27595	3.13696	0.1	1000
BMPR2	bone morphogenetic protein receptor type 2 [Source:HGNC Symbol;Acc:HGNC:1078]	0.332823	0.251699	0.145	0.136	1	mg-TAM 2	All other cells	ND1_7.Neftel_2019_10x Myeloid_cells	0.308545	0.217635	0.1	1000
NAA25	N-alpha-acetyltransferase 25, NatB auxiliary subunit [Source:HGNC Symbol;Acc:HGNC:25783]	0.334757	0.35469	0.102	0.085	1	mg-TAM 2	All other cells	ND1_7.Neftel_2019_10x Myeloid_cells	0.233119	0.133646	0.1	1000
ABR	ABR activator of RhoGEF and GTPase [Source:HGNC Symbol;Acc:HGNC:81]	0.338439	0.312855	0.235	0.217	1	mg-TAM 2	All other cells	ND1_7.Neftel_2019_10x Myeloid_cells	0.55801	0.38124	0.1	1000
FNBP4	formin binding protein 4 [Source:HGNC Symbol;Acc:HGNC:19752]	0.343387	0.263786	0.208	0.204	1	mg-TAM 2	All other cells	ND1_7.Neftel_2019_10x Myeloid_cells	0.495062	0.357089	0.1	1000
ZNF24	zinc finger protein 24 [Source:HGNC Symbol;Acc:HGNC:13032]	0.351879	0.355607	0.224	0.201	1	mg-TAM 2	All other cells	ND1_7.Neftel_2019_10x Myeloid_cells	0.51887	0.333672	0.1	1000
RSBN1	round spermatid basic protein 1 [Source:HGNC Symbol;Acc:HGNC:25642]	0.352042	0.297299	0.117	0.104	1	mg-TAM 2	All other cells	ND1_7.Neftel_2019_10x Myeloid_cells	0.25322	0.16238	0.1	1000
IFI27	interferon alpha inducible protein 27 [Source:HGNC Symbol;Acc:HGNC:5397]	0.354322	-0.38051	0.259	0.268	1	mg-TAM 2	All other cells	ND1_7.Neftel_2019_10x Myeloid_cells	2.99285	4.42493	0.1	1000
ATG4C	autophagy related 4C cysteine peptidase [Source:HGNC Symbol;Acc:HGNC:16040]	0.356264	0.288832	0.145	0.137	1	mg-TAM 2	All other cells	ND1_7.Neftel_2019_10x Myeloid_cells	0.312576	0.209077	0.1	1000
FAM219B	family with sequence similarity 219 member B [Source:HGNC Symbol;Acc:HGNC:24695]	0.359495	0.439243	0.138	0.104	1	mg-TAM 2	All other cells	ND1_7.Neftel_2019_10x Myeloid_cells	0.306115	0.161751	0.1	1000
TRIM56	tripartite motif containing 56 [Source:HGNC Symbol;Acc:HGNC:19028]	0.372561	0.297208	0.114	0.103	1	mg-TAM 2	All other cells	ND1_7.Neftel_2019_10x Myeloid_cells	0.264905	0.171084	0.1	1000
NUDT16L1	nudix hydrolase 16 like 1 [Source:HGNC Symbol;Acc:HGNC:28154]	0.373869	0.306251	0.146	0.139	1	mg-TAM 2	All other cells	ND1_7.Neftel_2019_10x Myeloid_cells	0.314353	0.205048	0.1	1000
MAGEH1	MAGE family member H1 [Source:HGNC Symbol;Acc:HGNC:24092]	0.378747	0.270673	0.101	0.094	1	mg-TAM 2	All other cells	ND1_7.Neftel_2019_10x Myeloid_cells	0.219363	0.143631	0.1	1000
TRAPPC12	trafficking protein particle complex 12 [Source:HGNC Symbol;Acc:HGNC:24284]	0.382724	0.285887	0.15	0.145	1	mg-TAM 2	All other cells	ND1_7.Neftel_2019_10x Myeloid_cells	0.31828	0.214274	0.1	1000
GATAD1	GATA zinc finger domain containing 1 [Source:HGNC Symbol;Acc:HGNC:29941]	0.385156	0.288656	0.131	0.121	1	mg-TAM 2	All other cells	ND1_7.Neftel_2019_10x Myeloid_cells	0.298823	0.198826	0.1	1000
TAF7	TATA-box binding protein associated factor 7 [Source:HGNC Symbol;Acc:HGNC:11541]	0.386203	0.298504	0.316	0.294	1	mg-TAM 2	All other cells	ND1_7.Neftel_2019_10x Myeloid_cells	0.813893	0.578042	0.1	1000
OXLD1	oxidoreductase like domain containing 1 [Source:HGNC Symbol;Acc:HGNC:27901]	0.390279	0.346637	0.203	0.191	1	mg-TAM 2	All other cells	ND1_7.Neftel_2019_10x Myeloid_cells	0.460628	0.296399	0.1	1000
MSL3	MSL complex subunit 3 [Source:HGNC Symbol;Acc:HGNC:7370]	0.415663	0.251183	0.147	0.151	1	mg-TAM 2	All other cells	ND1_7.Neftel_2019_10x Myeloid_cells	0.342687	0.244357	0.1	1000
GIMAP6	GTPase, IMAP family member 6 [Source:HGNC Symbol;Acc:HGNC:21918]	0.417193	0.265679	0.133	0.121	1	mg-TAM 2	All other cells	ND1_7.Neftel_2019_10x Myeloid_cells	0.282796	0.193484	0.1	1000
CD180	CD180 molecule [Source:HGNC Symbol;Acc:HGNC:6726]	0.419984	0.317967	0.122	0.116	1	mg-TAM 2	All other cells	ND1_7.Neftel_2019_10x Myeloid_cells	0.279572	0.176187	0.1	1000
EPS8	epidermal growth factor receptor pathway substrate 8 [Source:HGNC Symbol;Acc:HGNC:3420]	0.425682	0.310716	0.192	0.174	1	mg-TAM 2	All other cells	ND1_7.Neftel_2019_10x Myeloid_cells	0.428314	0.287213	0.1	1000
CRYZL1	crystallin zeta like 1 [Source:HGNC Symbol;Acc:HGNC:2420]	0.427564	0.268088	0.16	0.153	1	mg-TAM 2	All other cells	ND1_7.Neftel_2019_10x Myeloid_cells	0.358081	0.250359	0.1	1000
SLC1A5	solute carrier family 1 member 5 [Source:HGNC Symbol;Acc:HGNC:10943]	0.429245	0.269023	0.228	0.226	1	mg-TAM 2	All other cells	ND1_7.Neftel_2019_10x Myeloid_cells	0.567755	0.410248	0.1	1000
PSMB8-AS1	PSMB8 antisense RNA 1 (head to head) [Source:NCBI gene (formerly Entrezgene);Acc:100507463]	0.436911	0.286795	0.153	0.147	1	mg-TAM 2	All other cells	ND1_7.Neftel_2019_10x Myeloid_cells	0.338521	0.229183	0.1	1000
SAMD9	sterile alpha motif domain containing 9 [Source:HGNC Symbol;Acc:HGNC:1348]	0.437425	0.287692	0.175	0.162	1	mg-TAM 2	All other cells	ND1_7.Neftel_2019_10x Myeloid_cells	0.397884	0.273409	0.1	1000
CYTH2	cytohesin 2 [Source:HGNC Symbol;Acc:HGNC:9502]	0.444879	0.250527	0.175	0.175	1	mg-TAM 2	All other cells	ND1_7.Neftel_2019_10x Myeloid_cells	0.382277	0.2754	0.1	1000
HMGCL	3-hydroxy-3-methylglutaryl-CoA lyase [Source:HGNC Symbol;Acc:HGNC:5005]	0.453268	0.266792	0.149	0.152	1	mg-TAM 2	All other cells	ND1_7.Neftel_2019_10x Myeloid_cells	0.344234	0.240208	0.1	1000
TMEM19	transmembrane protein 19 [Source:HGNC Symbol;Acc:HGNC:25605]	0.455246	0.305251	0.181	0.167	1	mg-TAM 2	All other cells	ND1_7.Neftel_2019_10x Myeloid_cells	0.38538	0.257695	0.1	1000
PURA	purine rich element binding protein A [Source:HGNC Symbol;Acc:HGNC:9701]	0.455915	0.284554	0.143	0.139	1	mg-TAM 2	All other cells	ND1_7.Neftel_2019_10x Myeloid_cells	0.315539	0.21263	0.1	1000
BOD1L1	biorientation of chromosomes in cell division 1 like 1 [Source:HGNC Symbol;Acc:HGNC:31792]	0.462291	0.283357	0.193	0.184	1	mg-TAM 2	All other cells	ND1_7.Neftel_2019_10x Myeloid_cells	0.437697	0.305021	0.1	1000
PGM2	phosphoglucomutase 2 [Source:HGNC Symbol;Acc:HGNC:8906]	0.466459	0.283664	0.188	0.184	1	mg-TAM 2	All other cells	ND1_7.Neftel_2019_10x Myeloid_cells	0.419471	0.291172	0.1	1000
FAM217B	family with sequence similarity 217 member B [Source:HGNC Symbol;Acc:HGNC:16170]	0.467356	0.323372	0.116	0.095	1	mg-TAM 2	All other cells	ND1_7.Neftel_2019_10x Myeloid_cells	0.244812	0.149542	0.1	1000
[truncated: 109 more rows]

## Sheet: mg-TAM 3
gene	description	p_val	avg_logFC	pct.1	pct.2	p_val_adj	cluster.1	cluster.2	dataset	ave.norm.expr.1	ave.norm.expr.2	pseudocount	max.cells.per.ident
[truncated: 608 more rows]

## Sheet: IL1B mg-TAM
gene	description	p_val	avg_logFC	pct.1	pct.2	p_val_adj	cluster.1	cluster.2	dataset	ave.norm.expr.1	ave.norm.expr.2	pseudocount	max.cells.per.ident
[truncated: 881 more rows]

[truncated: 10 more sheets: IFN mg-TAM, SEPP1 hi mo-TAM, Hypoxic mo-TAM, HSP TAM, MGH105 TAM, Proliferating TAM, Mono, cDC1, cDC2, Proliferating cDC2]
