# Supplementary material for: Global hypo-methylation in a proportion of glioblastoma enriched for an astrocytic signature is associated with increased invasion and altered immune landscape
Source: eLife. 2022 Nov 22;11:e77335. doi: 10.7554/eLife.77335 (PMC9681209; doi:10.7554/eLife.77335)
Supplement: Supplementary file 3. [file elife-77335-supp3.xlsx]

## Sheet: Overview
Differentially expressed genes in the Lymphocyte cell populations of the integrated dataset from newly diagnosed human GBM tumours of Antunes et al. and the 10x GBM tumours of Neftel et al.
											Column description
											gene	Gene name
											description	Ensembl gene description
											p_val	p value
											avg_logFC	Natural logarithm transformed fold-chage of the average expression between the two groups. Positive values indicate that the gene is more highly expressed in the first group.
											pct.1	The percentage of cells where the gene is detected in the first group
											pct.2	The percentage of cells where the gene is detected in the second group
											p_val_adj	Adjusted p-value, based on bonferroni correction using all genes in the dataset
											cluster.1	First group of cells
											cluster.2	Second group of cells
											dataset	Analysed dataset
											ave.norm.expr.1	Average expression of the gene in the first group
											ave.norm.expr.2	Average expression of the gene in the second group
											pseudocount	Pseudocount to add to averaged expression values when calculating logFC values
											max.cells.per.ident	Down sample each identity class to a maximum number of cells. Default is no downsampling (set to Inf)

## Sheet: Naive T
gene	description	p_val	avg_logFC	pct.1	pct.2	p_val_adj	cluster.1	cluster.2	dataset	ave.norm.expr.1	ave.norm.expr.2	pseudocount	max.cells.per.ident
RPL34	ribosomal protein L34 [Source:HGNC Symbol;Acc:HGNC:10340]	5.9278e-84	0.568649	0.991	0.996	1.13097e-79	Naive T	All other cells	ND1_7.Neftel_2019_10x Lymphocytes	82.5308	46.693	0.1	1000
RPL32	ribosomal protein L32 [Source:HGNC Symbol;Acc:HGNC:10336]	1.62773e-81	0.526541	0.994	0.996	3.10555e-77	Naive T	All other cells	ND1_7.Neftel_2019_10x Lymphocytes	87.7122	51.7658	0.1	1000
RPL10	ribosomal protein L10 [Source:HGNC Symbol;Acc:HGNC:10298]	8.43086e-81	0.446753	1	1	1.60852e-76	Naive T	All other cells	ND1_7.Neftel_2019_10x Lymphocytes	147.005	94.0036	0.1	1000
RPL11	ribosomal protein L11 [Source:HGNC Symbol;Acc:HGNC:10301]	5.33456e-79	0.500304	0.997	0.998	1.01778e-74	Naive T	All other cells	ND1_7.Neftel_2019_10x Lymphocytes	77.0334	46.6696	0.1	1000
RPS27A	ribosomal protein S27a [Source:HGNC Symbol;Acc:HGNC:10417]	1.42863e-76	0.474825	1	0.998	2.72568e-72	Naive T	All other cells	ND1_7.Neftel_2019_10x Lymphocytes	91.8014	57.0621	0.1	1000
RPS3A	ribosomal protein S3A [Source:HGNC Symbol;Acc:HGNC:10421]	6.01636e-73	0.569395	0.997	0.991	1.14786e-68	Naive T	All other cells	ND1_7.Neftel_2019_10x Lymphocytes	71.7176	40.5393	0.1	1000
EEF1A1	eukaryotic translation elongation factor 1 alpha 1 [Source:HGNC Symbol;Acc:HGNC:3189]	4.82653e-72	0.492582	1	0.997	9.20854e-68	Naive T	All other cells	ND1_7.Neftel_2019_10x Lymphocytes	154.072	94.1065	0.1	1000
RPL13	ribosomal protein L13 [Source:HGNC Symbol;Acc:HGNC:10303]	4.68486e-70	0.493797	0.994	0.992	8.93824e-66	Naive T	All other cells	ND1_7.Neftel_2019_10x Lymphocytes	127.508	77.7797	0.1	1000
RPS14	ribosomal protein S14 [Source:HGNC Symbol;Acc:HGNC:10387]	1.04482e-68	0.452419	1	0.996	1.99342e-64	Naive T	All other cells	ND1_7.Neftel_2019_10x Lymphocytes	83.9322	53.3518	0.1	1000
RPS3	ribosomal protein S3 [Source:HGNC Symbol;Acc:HGNC:10420]	6.68699e-68	0.397303	0.997	0.997	1.27581e-63	Naive T	All other cells	ND1_7.Neftel_2019_10x Lymphocytes	82.956	55.7244	0.1	1000
GZMA	granzyme A [Source:HGNC Symbol;Acc:HGNC:4708]	1.60399e-65	-1.92049	0.221	0.744	3.06026e-61	Naive T	All other cells	ND1_7.Neftel_2019_10x Lymphocytes	1.79257	12.8155	0.1	1000
CCL5	C-C motif chemokine ligand 5 [Source:HGNC Symbol;Acc:HGNC:10632]	4.06388e-65	-1.75994	0.293	0.807	7.75347e-61	Naive T	All other cells	ND1_7.Neftel_2019_10x Lymphocytes	4.67641	27.661	0.1	1000
RPS25	ribosomal protein S25 [Source:HGNC Symbol;Acc:HGNC:10413]	3.49453e-60	0.409199	0.991	0.994	6.66722e-56	Naive T	All other cells	ND1_7.Neftel_2019_10x Lymphocytes	57.6537	38.259	0.1	1000
RPS6	ribosomal protein S6 [Source:HGNC Symbol;Acc:HGNC:10429]	8.89355e-60	0.617131	0.991	0.989	1.6968e-55	Naive T	All other cells	ND1_7.Neftel_2019_10x Lymphocytes	78.4234	42.2626	0.1	1000
RPS13	ribosomal protein S13 [Source:HGNC Symbol;Acc:HGNC:10386]	1.44612e-59	0.466535	0.994	0.994	2.75906e-55	Naive T	All other cells	ND1_7.Neftel_2019_10x Lymphocytes	47.7725	29.9242	0.1	1000
RPS12	ribosomal protein S12 [Source:HGNC Symbol;Acc:HGNC:10385]	2.29329e-59	0.428394	1	0.998	4.37536e-55	Naive T	All other cells	ND1_7.Neftel_2019_10x Lymphocytes	113.859	74.1508	0.1	1000
ACTB	actin beta [Source:HGNC Symbol;Acc:HGNC:132]	5.76846e-59	-0.710276	0.991	0.999	1.10056e-54	Naive T	All other cells	ND1_7.Neftel_2019_10x Lymphocytes	41.6976	84.9395	0.1	1000
RPL5	ribosomal protein L5 [Source:HGNC Symbol;Acc:HGNC:10360]	5.58062e-58	0.532831	0.982	0.976	1.06473e-53	Naive T	All other cells	ND1_7.Neftel_2019_10x Lymphocytes	34.1269	19.9892	0.1	1000
RPL19	ribosomal protein L19 [Source:HGNC Symbol;Acc:HGNC:10312]	4.41523e-57	0.395628	1	0.998	8.42382e-53	Naive T	All other cells	ND1_7.Neftel_2019_10x Lymphocytes	71.4586	48.0773	0.1	1000
RPS23	ribosomal protein S23 [Source:HGNC Symbol;Acc:HGNC:10410]	6.34269e-57	0.408865	0.994	0.996	1.21012e-52	Naive T	All other cells	ND1_7.Neftel_2019_10x Lymphocytes	64.3009	42.6882	0.1	1000
RPS8	ribosomal protein S8 [Source:HGNC Symbol;Acc:HGNC:10441]	2.02768e-54	0.451774	0.997	0.995	3.86862e-50	Naive T	All other cells	ND1_7.Neftel_2019_10x Lymphocytes	59.295	37.7048	0.1	1000
RPL18A	ribosomal protein L18a [Source:HGNC Symbol;Acc:HGNC:10311]	3.28841e-54	0.384774	0.994	0.996	6.27397e-50	Naive T	All other cells	ND1_7.Neftel_2019_10x Lymphocytes	69.022	46.9447	0.1	1000
RPS18	ribosomal protein S18 [Source:HGNC Symbol;Acc:HGNC:10401]	6.68953e-54	0.518018	0.991	0.994	1.2763e-49	Naive T	All other cells	ND1_7.Neftel_2019_10x Lymphocytes	104.757	62.3631	0.1	1000
RPL9	ribosomal protein L9 [Source:HGNC Symbol;Acc:HGNC:10369]	5.26158e-53	0.581857	0.994	0.982	1.00386e-48	Naive T	All other cells	ND1_7.Neftel_2019_10x Lymphocytes	52.2367	29.1489	0.1	1000
RPL3	ribosomal protein L3 [Source:HGNC Symbol;Acc:HGNC:10332]	1.80528e-52	0.532559	0.997	0.992	3.4443e-48	Naive T	All other cells	ND1_7.Neftel_2019_10x Lymphocytes	66.247	38.8524	0.1	1000
RPL18	ribosomal protein L18 [Source:HGNC Symbol;Acc:HGNC:10310]	9.14525e-52	0.389043	0.994	0.996	1.74482e-47	Naive T	All other cells	ND1_7.Neftel_2019_10x Lymphocytes	44.7204	30.275	0.1	1000
NKG7	natural killer cell granule protein 7 [Source:HGNC Symbol;Acc:HGNC:7830]	1.71956e-51	-2.85093	0.113	0.584	3.28075e-47	Naive T	All other cells	ND1_7.Neftel_2019_10x Lymphocytes	0.7722	14.9925	0.1	1000
RPLP2	ribosomal protein lateral stalk subunit P2 [Source:HGNC Symbol;Acc:HGNC:10377]	3.09823e-50	0.428598	1	0.995	5.91112e-46	Naive T	All other cells	ND1_7.Neftel_2019_10x Lymphocytes	73.0286	47.5376	0.1	1000
RPL39	ribosomal protein L39 [Source:HGNC Symbol;Acc:HGNC:10350]	3.76399e-50	0.403491	0.988	0.986	7.18132e-46	Naive T	All other cells	ND1_7.Neftel_2019_10x Lymphocytes	61.8185	41.2606	0.1	1000
RPL14	ribosomal protein L14 [Source:HGNC Symbol;Acc:HGNC:10305]	6.18347e-49	0.405085	0.994	0.99	1.17974e-44	Naive T	All other cells	ND1_7.Neftel_2019_10x Lymphocytes	41.2196	27.4569	0.1	1000
RPS4X	ribosomal protein S4 X-linked [Source:HGNC Symbol;Acc:HGNC:10424]	4.45907e-47	0.438211	0.994	0.995	8.50747e-43	Naive T	All other cells	ND1_7.Neftel_2019_10x Lymphocytes	74.2731	47.8848	0.1	1000
CCL4	C-C motif chemokine ligand 4 [Source:HGNC Symbol;Acc:HGNC:10630]	1.57474e-46	-1.87512	0.376	0.734	3.00444e-42	Naive T	All other cells	ND1_7.Neftel_2019_10x Lymphocytes	5.71794	37.8424	0.1	1000
TPT1	tumor protein, translationally-controlled 1 [Source:HGNC Symbol;Acc:HGNC:12022]	1.63599e-46	0.393794	0.994	0.993	3.1213e-42	Naive T	All other cells	ND1_7.Neftel_2019_10x Lymphocytes	83.451	56.2545	0.1	1000
IL7R	interleukin 7 receptor [Source:HGNC Symbol;Acc:HGNC:6024]	5.26753e-46	0.942584	0.86	0.446	1.00499e-41	Naive T	All other cells	ND1_7.Neftel_2019_10x Lymphocytes	12.7543	4.90831	0.1	1000
RPL35A	ribosomal protein L35a [Source:HGNC Symbol;Acc:HGNC:10345]	7.18875e-46	0.378605	0.991	0.993	1.37154e-41	Naive T	All other cells	ND1_7.Neftel_2019_10x Lymphocytes	47.091	32.2171	0.1	1000
EEF1B2	eukaryotic translation elongation factor 1 beta 2 [Source:HGNC Symbol;Acc:HGNC:3208]	3.04242e-45	0.578267	0.961	0.911	5.80463e-41	Naive T	All other cells	ND1_7.Neftel_2019_10x Lymphocytes	19.5342	10.9122	0.1	1000
HLA-C	major histocompatibility complex, class I, C [Source:HGNC Symbol;Acc:HGNC:4933]	1.11543e-44	-0.454149	1	0.995	2.12813e-40	Naive T	All other cells	ND1_7.Neftel_2019_10x Lymphocytes	23.8113	37.5562	0.1	1000
RPL22	ribosomal protein L22 [Source:HGNC Symbol;Acc:HGNC:10315]	1.67751e-44	0.509922	0.976	0.951	3.20053e-40	Naive T	All other cells	ND1_7.Neftel_2019_10x Lymphocytes	23.2434	13.9187	0.1	1000
TMSB4X	thymosin beta 4 X-linked [Source:HGNC Symbol;Acc:HGNC:11881]	7.68747e-44	-0.464575	1	1	1.46669e-39	Naive T	All other cells	ND1_7.Neftel_2019_10x Lymphocytes	137.867	219.452	0.1	1000
PFN1	profilin 1 [Source:HGNC Symbol;Acc:HGNC:8881]	9.74319e-44	-0.582524	0.973	0.985	1.8589e-39	Naive T	All other cells	ND1_7.Neftel_2019_10x Lymphocytes	17.1848	30.8493	0.1	1000
RPL30	ribosomal protein L30 [Source:HGNC Symbol;Acc:HGNC:10333]	2.65772e-43	0.375625	0.997	0.995	5.07066e-39	Naive T	All other cells	ND1_7.Neftel_2019_10x Lymphocytes	76.2138	52.3169	0.1	1000
RPL12	ribosomal protein L12 [Source:HGNC Symbol;Acc:HGNC:10302]	3.50138e-43	0.383038	1	0.99	6.68029e-39	Naive T	All other cells	ND1_7.Neftel_2019_10x Lymphocytes	43.5354	29.6501	0.1	1000
RPL29	ribosomal protein L29 [Source:HGNC Symbol;Acc:HGNC:10331]	8.45183e-43	0.375511	0.997	0.991	1.61252e-38	Naive T	All other cells	ND1_7.Neftel_2019_10x Lymphocytes	43.1302	29.5965	0.1	1000
GZMH	granzyme H [Source:HGNC Symbol;Acc:HGNC:4710]	1.05909e-42	-2.40203	0.057	0.483	2.02064e-38	Naive T	All other cells	ND1_7.Neftel_2019_10x Lymphocytes	0.370002	5.09146	0.1	1000
RPL21	ribosomal protein L21 [Source:HGNC Symbol;Acc:HGNC:10313]	2.15649e-42	0.554456	0.988	0.988	4.11436e-38	Naive T	All other cells	ND1_7.Neftel_2019_10x Lymphocytes	80.6202	46.2644	0.1	1000
CD74	CD74 molecule [Source:HGNC Symbol;Acc:HGNC:1697]	2.66302e-42	-1.19614	0.785	0.927	5.08078e-38	Naive T	All other cells	ND1_7.Neftel_2019_10x Lymphocytes	6.30883	21.0961	0.1	1000
RPS15A	ribosomal protein S15a [Source:HGNC Symbol;Acc:HGNC:10389]	6.36209e-42	0.29248	0.997	0.996	1.21382e-37	Naive T	All other cells	ND1_7.Neftel_2019_10x Lymphocytes	79.6084	59.3952	0.1	1000
RPS9	ribosomal protein S9 [Source:HGNC Symbol;Acc:HGNC:10442]	2.60685e-41	0.388794	0.991	0.984	4.97361e-37	Naive T	All other cells	ND1_7.Neftel_2019_10x Lymphocytes	36.7018	24.8469	0.1	1000
RPL8	ribosomal protein L8 [Source:HGNC Symbol;Acc:HGNC:10368]	4.19128e-41	0.3789	0.991	0.99	7.99655e-37	Naive T	All other cells	ND1_7.Neftel_2019_10x Lymphocytes	37.894	25.9112	0.1	1000
RPL10A	ribosomal protein L10a [Source:HGNC Symbol;Acc:HGNC:10299]	1.28952e-40	0.428312	0.994	0.985	2.46027e-36	Naive T	All other cells	ND1_7.Neftel_2019_10x Lymphocytes	36.815	23.9541	0.1	1000
RPS5	ribosomal protein S5 [Source:HGNC Symbol;Acc:HGNC:10426]	2.75383e-40	0.457011	0.973	0.976	5.25403e-36	Naive T	All other cells	ND1_7.Neftel_2019_10x Lymphocytes	31.8789	20.1482	0.1	1000
CST7	cystatin F [Source:HGNC Symbol;Acc:HGNC:2479]	4.13561e-40	-1.39308	0.236	0.659	7.89033e-36	Naive T	All other cells	ND1_7.Neftel_2019_10x Lymphocytes	1.5243	6.44143	0.1	1000
RPSA	ribosomal protein SA [Source:HGNC Symbol;Acc:HGNC:6502]	1.29694e-38	0.376929	0.994	0.987	2.47442e-34	Naive T	All other cells	ND1_7.Neftel_2019_10x Lymphocytes	36.1143	24.7418	0.1	1000
GAPDH	glyceraldehyde-3-phosphate dehydrogenase [Source:HGNC Symbol;Acc:HGNC:4141]	7.28323e-38	-0.571779	0.961	0.986	1.38957e-33	Naive T	All other cells	ND1_7.Neftel_2019_10x Lymphocytes	15.1584	26.929	0.1	1000
RPS16	ribosomal protein S16 [Source:HGNC Symbol;Acc:HGNC:10396]	3.44416e-37	0.416169	0.994	0.988	6.57112e-33	Naive T	All other cells	ND1_7.Neftel_2019_10x Lymphocytes	47.7949	31.49	0.1	1000
RPL37	ribosomal protein L37 [Source:HGNC Symbol;Acc:HGNC:10347]	3.78923e-37	0.344831	0.994	0.989	7.22946e-33	Naive T	All other cells	ND1_7.Neftel_2019_10x Lymphocytes	43.2954	30.6387	0.1	1000
HLA-DRB1	major histocompatibility complex, class II, DR beta 1 [Source:HGNC Symbol;Acc:HGNC:4948]	1.12654e-36	-1.74175	0.278	0.608	2.14932e-32	Naive T	All other cells	ND1_7.Neftel_2019_10x Lymphocytes	1.04717	6.44731	0.1	1000
HLA-A	major histocompatibility complex, class I, A [Source:HGNC Symbol;Acc:HGNC:4931]	1.70263e-36	-0.499506	0.976	0.994	3.24844e-32	Naive T	All other cells	ND1_7.Neftel_2019_10x Lymphocytes	20.9692	34.62	0.1	1000
MYL6	myosin light chain 6 [Source:HGNC Symbol;Acc:HGNC:7587]	3.53339e-36	-0.507562	0.928	0.97	6.74136e-32	Naive T	All other cells	ND1_7.Neftel_2019_10x Lymphocytes	10.5933	17.6641	0.1	1000
CFL1	cofilin 1 [Source:HGNC Symbol;Acc:HGNC:1874]	2.32071e-35	-0.524405	0.899	0.958	4.42768e-31	Naive T	All other cells	ND1_7.Neftel_2019_10x Lymphocytes	10.7087	18.1608	0.1	1000
RPL4	ribosomal protein L4 [Source:HGNC Symbol;Acc:HGNC:10353]	3.65756e-35	0.509483	0.967	0.932	6.97825e-31	Naive T	All other cells	ND1_7.Neftel_2019_10x Lymphocytes	20.9558	12.5504	0.1	1000
RPS27	ribosomal protein S27 [Source:HGNC Symbol;Acc:HGNC:10416]	3.87893e-35	0.276881	0.994	0.995	7.40061e-31	Naive T	All other cells	ND1_7.Neftel_2019_10x Lymphocytes	112.78	85.4793	0.1	1000
RPL6	ribosomal protein L6 [Source:HGNC Symbol;Acc:HGNC:10362]	8.34004e-35	0.352241	0.994	0.994	1.5912e-30	Naive T	All other cells	ND1_7.Neftel_2019_10x Lymphocytes	39.3302	27.6238	0.1	1000
SH3BGRL3	SH3 domain binding glutamate rich protein like 3 [Source:HGNC Symbol;Acc:HGNC:15568]	1.037e-34	-0.48255	0.922	0.976	1.97849e-30	Naive T	All other cells	ND1_7.Neftel_2019_10x Lymphocytes	14.5977	23.7132	0.1	1000
B2M	beta-2-microglobulin [Source:HGNC Symbol;Acc:HGNC:914]	1.1734e-34	-0.271352	1	1	2.23873e-30	Naive T	All other cells	ND1_7.Neftel_2019_10x Lymphocytes	145.932	191.456	0.1	1000
APOBEC3G	apolipoprotein B mRNA editing enzyme catalytic subunit 3G [Source:HGNC Symbol;Acc:HGNC:17357]	8.27202e-34	-1.55188	0.149	0.517	1.57822e-29	Naive T	All other cells	ND1_7.Neftel_2019_10x Lymphocytes	0.565934	3.04344	0.1	1000
RPL36	ribosomal protein L36 [Source:HGNC Symbol;Acc:HGNC:13631]	2.38862e-33	0.335219	0.991	0.989	4.55724e-29	Naive T	All other cells	ND1_7.Neftel_2019_10x Lymphocytes	35.6675	25.4803	0.1	1000
RPL7	ribosomal protein L7 [Source:HGNC Symbol;Acc:HGNC:10363]	4.28471e-33	0.640926	0.952	0.925	8.1748e-29	Naive T	All other cells	ND1_7.Neftel_2019_10x Lymphocytes	41.9957	22.0762	0.1	1000
RPS28	ribosomal protein S28 [Source:HGNC Symbol;Acc:HGNC:10418]	8.91892e-33	0.317657	0.997	0.996	1.70164e-28	Naive T	All other cells	ND1_7.Neftel_2019_10x Lymphocytes	53.4868	38.9033	0.1	1000
RPL23A	ribosomal protein L23a [Source:HGNC Symbol;Acc:HGNC:10317]	1.07343e-31	0.330655	0.994	0.997	2.04799e-27	Naive T	All other cells	ND1_7.Neftel_2019_10x Lymphocytes	63.8926	45.8757	0.1	1000
PRF1	perforin 1 [Source:HGNC Symbol;Acc:HGNC:9360]	1.46958e-31	-2.23511	0.057	0.405	2.80381e-27	Naive T	All other cells	ND1_7.Neftel_2019_10x Lymphocytes	0.213472	2.8302	0.1	1000
ARPC2	actin related protein 2/3 complex subunit 2 [Source:HGNC Symbol;Acc:HGNC:705]	2.69775e-30	-0.583753	0.782	0.891	5.14703e-26	Naive T	All other cells	ND1_7.Neftel_2019_10x Lymphocytes	5.17807	9.36229	0.1	1000
RPL15	ribosomal protein L15 [Source:HGNC Symbol;Acc:HGNC:10306]	1.6233e-29	0.295124	0.985	0.995	3.09709e-25	Naive T	All other cells	ND1_7.Neftel_2019_10x Lymphocytes	44.2572	32.9212	0.1	1000
CLIC1	chloride intracellular channel 1 [Source:HGNC Symbol;Acc:HGNC:2062]	4.20675e-29	-0.570249	0.701	0.883	8.02607e-25	Naive T	All other cells	ND1_7.Neftel_2019_10x Lymphocytes	4.52977	8.0887	0.1	1000
RPL13A	ribosomal protein L13a [Source:HGNC Symbol;Acc:HGNC:10304]	7.3624e-29	0.528134	0.967	0.97	1.40467e-24	Naive T	All other cells	ND1_7.Neftel_2019_10x Lymphocytes	96.0778	56.6165	0.1	1000
ACTG1	actin gamma 1 [Source:HGNC Symbol;Acc:HGNC:144]	1.00402e-28	-0.56215	0.946	0.962	1.91557e-24	Naive T	All other cells	ND1_7.Neftel_2019_10x Lymphocytes	12.9403	22.7785	0.1	1000
RPS2	ribosomal protein S2 [Source:HGNC Symbol;Acc:HGNC:10404]	1.73082e-27	0.439481	0.985	0.984	3.30222e-23	Naive T	All other cells	ND1_7.Neftel_2019_10x Lymphocytes	70.0462	45.1002	0.1	1000
PSMB9	proteasome 20S subunit beta 9 [Source:HGNC Symbol;Acc:HGNC:9546]	2.1796e-27	-0.773463	0.487	0.736	4.15846e-23	Naive T	All other cells	ND1_7.Neftel_2019_10x Lymphocytes	2.39928	5.31659	0.1	1000
HLA-B	major histocompatibility complex, class I, B [Source:HGNC Symbol;Acc:HGNC:4932]	7.18122e-27	-0.405295	0.979	0.995	1.3701e-22	Naive T	All other cells	ND1_7.Neftel_2019_10x Lymphocytes	27.657	41.5284	0.1	1000
GZMK	granzyme K [Source:HGNC Symbol;Acc:HGNC:4711]	9.63652e-27	-1.36373	0.173	0.481	1.83855e-22	Naive T	All other cells	ND1_7.Neftel_2019_10x Lymphocytes	1.86591	7.58818	0.1	1000
HLA-DPA1	major histocompatibility complex, class II, DP alpha 1 [Source:HGNC Symbol;Acc:HGNC:4938]	1.25905e-26	-1.26123	0.337	0.624	2.40214e-22	Naive T	All other cells	ND1_7.Neftel_2019_10x Lymphocytes	1.45102	5.37473	0.1	1000
LSP1	lymphocyte specific protein 1 [Source:HGNC Symbol;Acc:HGNC:6707]	1.88412e-26	-0.874598	0.448	0.716	3.59472e-22	Naive T	All other cells	ND1_7.Neftel_2019_10x Lymphocytes	1.97059	4.86509	0.1	1000
RPL38	ribosomal protein L38 [Source:HGNC Symbol;Acc:HGNC:10349]	7.89067e-26	0.450908	0.94	0.938	1.50546e-21	Naive T	All other cells	ND1_7.Neftel_2019_10x Lymphocytes	21.0146	13.351	0.1	1000
HLA-DPB1	major histocompatibility complex, class II, DP beta 1 [Source:HGNC Symbol;Acc:HGNC:4940]	1.00845e-25	-1.26768	0.301	0.602	1.92403e-21	Naive T	All other cells	ND1_7.Neftel_2019_10x Lymphocytes	1.36774	5.11431	0.1	1000
RPL31	ribosomal protein L31 [Source:HGNC Symbol;Acc:HGNC:10334]	2.58696e-25	0.473466	0.97	0.96	4.93567e-21	Naive T	All other cells	ND1_7.Neftel_2019_10x Lymphocytes	40.9029	25.4382	0.1	1000
UBC	ubiquitin C [Source:HGNC Symbol;Acc:HGNC:12468]	5.31132e-25	-0.473822	0.907	0.973	1.01335e-20	Naive T	All other cells	ND1_7.Neftel_2019_10x Lymphocytes	10.827	17.4502	0.1	1000
CTSC	cathepsin C [Source:HGNC Symbol;Acc:HGNC:2528]	2.27048e-24	-1.00921	0.233	0.564	4.33184e-20	Naive T	All other cells	ND1_7.Neftel_2019_10x Lymphocytes	1.09178	3.16959	0.1	1000
GZMB	granzyme B [Source:HGNC Symbol;Acc:HGNC:4709]	3.3548e-24	-2.95557	0.048	0.336	6.40063e-20	Naive T	All other cells	ND1_7.Neftel_2019_10x Lymphocytes	0.206186	5.78266	0.1	1000
CORO1A	coronin 1A [Source:HGNC Symbol;Acc:HGNC:2252]	8.7836e-24	-0.560044	0.851	0.9	1.67582e-19	Naive T	All other cells	ND1_7.Neftel_2019_10x Lymphocytes	6.95287	12.2478	0.1	1000
KLF2	Kruppel like factor 2 [Source:HGNC Symbol;Acc:HGNC:6347]	1.32606e-23	0.912184	0.343	0.107	2.53e-19	Naive T	All other cells	ND1_7.Neftel_2019_10x Lymphocytes	1.46606	0.529001	0.1	1000
HCST	hematopoietic cell signal transducer [Source:HGNC Symbol;Acc:HGNC:16977]	2.67323e-23	-0.562879	0.71	0.876	5.10026e-19	Naive T	All other cells	ND1_7.Neftel_2019_10x Lymphocytes	5.29277	9.3682	0.1	1000
OAZ1	ornithine decarboxylase antizyme 1 [Source:HGNC Symbol;Acc:HGNC:8095]	3.70674e-23	-0.434619	0.854	0.936	7.07209e-19	Naive T	All other cells	ND1_7.Neftel_2019_10x Lymphocytes	6.64162	10.3116	0.1	1000
CCR7	C-C motif chemokine receptor 7 [Source:HGNC Symbol;Acc:HGNC:1608]	4.38789e-23	1.15354	0.328	0.09	8.37165e-19	Naive T	All other cells	ND1_7.Neftel_2019_10x Lymphocytes	1.51343	0.409067	0.1	1000
STK17A	serine/threonine kinase 17a [Source:HGNC Symbol;Acc:HGNC:11395]	7.057e-23	-0.771313	0.287	0.57	1.3464e-18	Naive T	All other cells	ND1_7.Neftel_2019_10x Lymphocytes	1.28386	2.89275	0.1	1000
SUB1	SUB1 regulator of transcription [Source:HGNC Symbol;Acc:HGNC:19985]	7.4242e-23	-0.58954	0.737	0.863	1.41646e-18	Naive T	All other cells	ND1_7.Neftel_2019_10x Lymphocytes	4.66028	8.48355	0.1	1000
MAL	mal, T cell differentiation protein [Source:HGNC Symbol;Acc:HGNC:6817]	9.0841e-23	1.28113	0.331	0.092	1.73315e-18	Naive T	All other cells	ND1_7.Neftel_2019_10x Lymphocytes	1.45321	0.331362	0.1	1000
RPL26	ribosomal protein L26 [Source:HGNC Symbol;Acc:HGNC:10327]	1.99179e-22	0.380109	0.964	0.975	3.80013e-18	Naive T	All other cells	ND1_7.Neftel_2019_10x Lymphocytes	40.7089	27.8046	0.1	1000
CD8A	CD8a molecule [Source:HGNC Symbol;Acc:HGNC:1706]	3.41536e-22	-1.96596	0.069	0.334	6.51616e-18	Naive T	All other cells	ND1_7.Neftel_2019_10x Lymphocytes	0.387474	3.38144	0.1	1000
RPS7	ribosomal protein S7 [Source:HGNC Symbol;Acc:HGNC:10440]	3.70979e-22	0.260596	0.994	0.995	7.07792e-18	Naive T	All other cells	ND1_7.Neftel_2019_10x Lymphocytes	41.5004	31.9569	0.1	1000
CYBA	cytochrome b-245 alpha chain [Source:HGNC Symbol;Acc:HGNC:2577]	5.55617e-22	-0.551425	0.764	0.893	1.06006e-17	Naive T	All other cells	ND1_7.Neftel_2019_10x Lymphocytes	5.98678	10.465	0.1	1000
IFI27L2	interferon alpha inducible protein 27 like 2 [Source:HGNC Symbol;Acc:HGNC:19753]	2.16307e-21	-1.19991	0.131	0.42	4.12691e-17	Naive T	All other cells	ND1_7.Neftel_2019_10x Lymphocytes	0.460065	1.75931	0.1	1000
EIF3E	eukaryotic translation initiation factor 3 subunit E [Source:HGNC Symbol;Acc:HGNC:3277]	3.10083e-21	0.563564	0.806	0.674	5.91608e-17	Naive T	All other cells	ND1_7.Neftel_2019_10x Lymphocytes	6.72543	3.78487	0.1	1000
LY6E	lymphocyte antigen 6 family member E [Source:HGNC Symbol;Acc:HGNC:6727]	5.63346e-21	-0.729545	0.504	0.733	1.07481e-16	Naive T	All other cells	ND1_7.Neftel_2019_10x Lymphocytes	3.01726	6.36562	0.1	1000
CTSW	cathepsin W [Source:HGNC Symbol;Acc:HGNC:2546]	6.60269e-21	-1.43872	0.26	0.497	1.25973e-16	Naive T	All other cells	ND1_7.Neftel_2019_10x Lymphocytes	1.11053	5.00273	0.1	1000
MYL12B	myosin light chain 12B [Source:HGNC Symbol;Acc:HGNC:29827]	7.11202e-21	-0.412772	0.773	0.889	1.3569e-16	Naive T	All other cells	ND1_7.Neftel_2019_10x Lymphocytes	5.41488	8.23299	0.1	1000
UBA52	ubiquitin A-52 residue ribosomal protein fusion product 1 [Source:HGNC Symbol;Acc:HGNC:12458]	8.10089e-21	0.266152	0.988	0.977	1.54557e-16	Naive T	All other cells	ND1_7.Neftel_2019_10x Lymphocytes	26.7044	20.4408	0.1	1000
HLA-DRA	major histocompatibility complex, class II, DR alpha [Source:HGNC Symbol;Acc:HGNC:4947]	8.60458e-21	-1.15867	0.43	0.656	1.64167e-16	Naive T	All other cells	ND1_7.Neftel_2019_10x Lymphocytes	2.14082	7.03857	0.1	1000
LCP1	lymphocyte cytosolic protein 1 [Source:HGNC Symbol;Acc:HGNC:6528]	1.56452e-20	-0.676155	0.367	0.654	2.98496e-16	Naive T	All other cells	ND1_7.Neftel_2019_10x Lymphocytes	1.85902	3.75202	0.1	1000
LTB	lymphotoxin beta [Source:HGNC Symbol;Acc:HGNC:6711]	1.58267e-20	0.508008	0.818	0.596	3.01957e-16	Naive T	All other cells	ND1_7.Neftel_2019_10x Lymphocytes	15.6043	9.34917	0.1	1000
RPL27	ribosomal protein L27 [Source:HGNC Symbol;Acc:HGNC:10328]	3.87784e-20	0.336315	0.97	0.973	7.39853e-16	Naive T	All other cells	ND1_7.Neftel_2019_10x Lymphocytes	28.2508	20.1537	0.1	1000
RPL27A	ribosomal protein L27a [Source:HGNC Symbol;Acc:HGNC:10329]	4.28532e-20	0.39059	0.949	0.937	8.17595e-16	Naive T	All other cells	ND1_7.Neftel_2019_10x Lymphocytes	51.9463	35.1175	0.1	1000
RPS20	ribosomal protein S20 [Source:HGNC Symbol;Acc:HGNC:10405]	4.71893e-20	0.460417	0.875	0.859	9.00326e-16	Naive T	All other cells	ND1_7.Neftel_2019_10x Lymphocytes	35.5712	22.4093	0.1	1000
SRGN	serglycin [Source:HGNC Symbol;Acc:HGNC:9361]	1.15752e-19	-0.383458	0.866	0.956	2.20842e-15	Naive T	All other cells	ND1_7.Neftel_2019_10x Lymphocytes	11.2298	16.5248	0.1	1000
CD99	CD99 molecule (Xg blood group) [Source:HGNC Symbol;Acc:HGNC:7082]	2.26269e-19	-0.556322	0.57	0.796	4.31698e-15	Naive T	All other cells	ND1_7.Neftel_2019_10x Lymphocytes	3.47164	6.12981	0.1	1000
RPL35	ribosomal protein L35 [Source:HGNC Symbol;Acc:HGNC:10344]	3.85592e-19	0.269818	0.988	0.983	7.35672e-15	Naive T	All other cells	ND1_7.Neftel_2019_10x Lymphocytes	31.1118	23.7308	0.1	1000
IL32	interleukin 32 [Source:HGNC Symbol;Acc:HGNC:16830]	3.91687e-19	-0.499397	0.922	0.915	7.473e-15	Naive T	All other cells	ND1_7.Neftel_2019_10x Lymphocytes	15.7518	26.0194	0.1	1000
NACA	nascent polypeptide associated complex subunit alpha [Source:HGNC Symbol;Acc:HGNC:7629]	4.52894e-19	0.309106	0.979	0.972	8.64077e-15	Naive T	All other cells	ND1_7.Neftel_2019_10x Lymphocytes	21.6125	15.8392	0.1	1000
ATP5E		4.72867e-19	-0.32301	0.949	0.971	9.02184e-15	Naive T	All other cells	ND1_7.Neftel_2019_10x Lymphocytes	11.2837	15.6241	0.1	1000
CD8B	CD8b molecule [Source:HGNC Symbol;Acc:HGNC:1707]	5.07857e-19	-1.45215	0.075	0.314	9.6894e-15	Naive T	All other cells	ND1_7.Neftel_2019_10x Lymphocytes	0.541306	2.63984	0.1	1000
ITM2C	integral membrane protein 2C [Source:HGNC Symbol;Acc:HGNC:6175]	5.52738e-19	-1.26696	0.134	0.372	1.05457e-14	Naive T	All other cells	ND1_7.Neftel_2019_10x Lymphocytes	0.561369	2.24788	0.1	1000
GLTSCR2		7.17627e-19	0.449488	0.863	0.763	1.36916e-14	Naive T	All other cells	ND1_7.Neftel_2019_10x Lymphocytes	8.2438	5.22297	0.1	1000
EVL	Enah/Vasp-like [Source:HGNC Symbol;Acc:HGNC:20234]	2.19823e-18	-0.574325	0.573	0.773	4.19399e-14	Naive T	All other cells	ND1_7.Neftel_2019_10x Lymphocytes	2.97765	5.36569	0.1	1000
RPLP0	ribosomal protein lateral stalk subunit P0 [Source:HGNC Symbol;Acc:HGNC:10371]	3.30273e-18	0.299266	1	0.98	6.30128e-14	Naive T	All other cells	ND1_7.Neftel_2019_10x Lymphocytes	29.821	22.0823	0.1	1000
GNB2L1		3.35064e-18	0.275152	0.985	0.979	6.39269e-14	Naive T	All other cells	ND1_7.Neftel_2019_10x Lymphocytes	25.0331	18.9875	0.1	1000
PSMA7	proteasome 20S subunit alpha 7 [Source:HGNC Symbol;Acc:HGNC:9536]	3.46315e-18	-0.620929	0.513	0.734	6.60734e-14	Naive T	All other cells	ND1_7.Neftel_2019_10x Lymphocytes	2.44172	4.62927	0.1	1000
DUSP2	dual specificity phosphatase 2 [Source:HGNC Symbol;Acc:HGNC:3068]	7.96394e-18	-0.74505	0.346	0.614	1.51944e-13	Naive T	All other cells	ND1_7.Neftel_2019_10x Lymphocytes	3.90389	8.33439	0.1	1000
COX8A	cytochrome c oxidase subunit 8A [Source:HGNC Symbol;Acc:HGNC:2294]	2.28572e-17	-0.501415	0.499	0.72	4.36092e-13	Naive T	All other cells	ND1_7.Neftel_2019_10x Lymphocytes	2.60567	4.36722	0.1	1000
DYNLL1	dynein light chain LC8-type 1 [Source:HGNC Symbol;Acc:HGNC:15476]	2.49091e-17	-0.851931	0.257	0.534	4.75241e-13	Naive T	All other cells	ND1_7.Neftel_2019_10x Lymphocytes	1.04684	2.5884	0.1	1000
COX7A2	cytochrome c oxidase subunit 7A2 [Source:HGNC Symbol;Acc:HGNC:2288]	2.55107e-17	-0.45779	0.612	0.781	4.86718e-13	Naive T	All other cells	ND1_7.Neftel_2019_10x Lymphocytes	3.20394	5.12214	0.1	1000
ARPC3	actin related protein 2/3 complex subunit 3 [Source:HGNC Symbol;Acc:HGNC:706]	2.96946e-17	-0.420184	0.776	0.878	5.66544e-13	Naive T	All other cells	ND1_7.Neftel_2019_10x Lymphocytes	5.15959	7.90636	0.1	1000
SRP14	signal recognition particle 14 [Source:HGNC Symbol;Acc:HGNC:11299]	4.15658e-17	-0.429739	0.743	0.891	7.93034e-13	Naive T	All other cells	ND1_7.Neftel_2019_10x Lymphocytes	4.80143	7.43279	0.1	1000
RPS29	ribosomal protein S29 [Source:HGNC Symbol;Acc:HGNC:10419]	7.69067e-17	0.319402	0.976	0.982	1.4673e-12	Naive T	All other cells	ND1_7.Neftel_2019_10x Lymphocytes	48.8348	35.4552	0.1	1000
GYG1	glycogenin 1 [Source:HGNC Symbol;Acc:HGNC:4699]	8.33604e-17	-1.17187	0.081	0.295	1.59043e-12	Naive T	All other cells	ND1_7.Neftel_2019_10x Lymphocytes	0.332883	1.29735	0.1	1000
ID2	inhibitor of DNA binding 2 [Source:HGNC Symbol;Acc:HGNC:5361]	8.33991e-17	-0.780111	0.412	0.648	1.59117e-12	Naive T	All other cells	ND1_7.Neftel_2019_10x Lymphocytes	2.98162	6.62322	0.1	1000
RAC2	Rac family small GTPase 2 [Source:HGNC Symbol;Acc:HGNC:9802]	1.04311e-16	-0.443584	0.66	0.804	1.99015e-12	Naive T	All other cells	ND1_7.Neftel_2019_10x Lymphocytes	4.02576	6.3291	0.1	1000
CHST12	carbohydrate sulfotransferase 12 [Source:HGNC Symbol;Acc:HGNC:17423]	1.17122e-16	-1.17393	0.104	0.346	2.23456e-12	Naive T	All other cells	ND1_7.Neftel_2019_10x Lymphocytes	0.382475	1.46065	0.1	1000
RPS17	ribosomal protein S17 [Source:HGNC Symbol;Acc:HGNC:10397]	1.55864e-16	0.482569	0.839	0.783	2.97372e-12	Naive T	All other cells	ND1_7.Neftel_2019_10x Lymphocytes	31.5729	19.4483	0.1	1000
PPP1R18	protein phosphatase 1 regulatory subunit 18 [Source:HGNC Symbol;Acc:HGNC:29413]	1.70376e-16	-0.674598	0.239	0.494	3.25061e-12	Naive T	All other cells	ND1_7.Neftel_2019_10x Lymphocytes	1.07174	2.20041	0.1	1000
CXCR6	C-X-C motif chemokine receptor 6 [Source:HGNC Symbol;Acc:HGNC:16647]	2.11052e-16	-1.56607	0.045	0.256	4.02666e-12	Naive T	All other cells	ND1_7.Neftel_2019_10x Lymphocytes	0.187991	1.27884	0.1	1000
PABPC1	poly(A) binding protein cytoplasmic 1 [Source:HGNC Symbol;Acc:HGNC:8554]	2.29174e-16	0.397084	0.913	0.8	4.37241e-12	Naive T	All other cells	ND1_7.Neftel_2019_10x Lymphocytes	9.84037	6.58269	0.1	1000
CAP1	cyclase associated actin cytoskeleton regulatory protein 1 [Source:HGNC Symbol;Acc:HGNC:20040]	3.32515e-16	-0.639012	0.367	0.613	6.34405e-12	Naive T	All other cells	ND1_7.Neftel_2019_10x Lymphocytes	1.62124	3.16107	0.1	1000
CTSD	cathepsin D [Source:HGNC Symbol;Acc:HGNC:2529]	4.72673e-16	-0.712066	0.29	0.506	9.01814e-12	Naive T	All other cells	ND1_7.Neftel_2019_10x Lymphocytes	1.14835	2.44439	0.1	1000
MYL12A	myosin light chain 12A [Source:HGNC Symbol;Acc:HGNC:16701]	9.94978e-16	-0.332239	0.946	0.949	1.89832e-11	Naive T	All other cells	ND1_7.Neftel_2019_10x Lymphocytes	11.0424	15.4335	0.1	1000
PPP1CA	protein phosphatase 1 catalytic subunit alpha [Source:HGNC Symbol;Acc:HGNC:9281]	1.45308e-15	-0.653745	0.436	0.626	2.77234e-11	Naive T	All other cells	ND1_7.Neftel_2019_10x Lymphocytes	1.71814	3.39578	0.1	1000
DRAP1	DR1 associated protein 1 [Source:HGNC Symbol;Acc:HGNC:3019]	1.96387e-15	-0.540242	0.412	0.651	3.74686e-11	Naive T	All other cells	ND1_7.Neftel_2019_10x Lymphocytes	2.0385	3.57058	0.1	1000
HSP90AA1	heat shock protein 90 alpha family class A member 1 [Source:HGNC Symbol;Acc:HGNC:5253]	5.74971e-15	-0.665973	0.737	0.866	1.09699e-10	Naive T	All other cells	ND1_7.Neftel_2019_10x Lymphocytes	6.31302	12.3822	0.1	1000
SOCS3	suppressor of cytokine signaling 3 [Source:HGNC Symbol;Acc:HGNC:19391]	6.33956e-15	0.937643	0.352	0.153	1.20953e-10	Naive T	All other cells	ND1_7.Neftel_2019_10x Lymphocytes	1.78795	0.639228	0.1	1000
FXYD5	FXYD domain containing ion transport regulator 5 [Source:HGNC Symbol;Acc:HGNC:4029]	6.79486e-15	0.398184	0.881	0.785	1.29639e-10	Naive T	All other cells	ND1_7.Neftel_2019_10x Lymphocytes	9.19849	6.14429	0.1	1000
AC092580.4		7.02964e-15	-1.07471	0.119	0.34	1.34118e-10	Naive T	All other cells	ND1_7.Neftel_2019_10x Lymphocytes	0.54156	1.77923	0.1	1000
POMP	proteasome maturation protein [Source:HGNC Symbol;Acc:HGNC:20330]	8.25708e-15	-0.632013	0.397	0.593	1.57537e-10	Naive T	All other cells	ND1_7.Neftel_2019_10x Lymphocytes	1.55459	3.01293	0.1	1000
TPI1	triosephosphate isomerase 1 [Source:HGNC Symbol;Acc:HGNC:12009]	1.04422e-14	-0.570017	0.493	0.687	1.99227e-10	Naive T	All other cells	ND1_7.Neftel_2019_10x Lymphocytes	2.45941	4.42579	0.1	1000
CD2	CD2 molecule [Source:HGNC Symbol;Acc:HGNC:1639]	1.19903e-14	-0.500186	0.731	0.823	2.28763e-10	Naive T	All other cells	ND1_7.Neftel_2019_10x Lymphocytes	5.66605	9.40838	0.1	1000
CKLF	chemokine like factor [Source:HGNC Symbol;Acc:HGNC:13253]	1.22259e-14	-0.779652	0.26	0.477	2.33258e-10	Naive T	All other cells	ND1_7.Neftel_2019_10x Lymphocytes	1.22026	2.77911	0.1	1000
IDH2	isocitrate dehydrogenase (NADP(+)) 2 [Source:HGNC Symbol;Acc:HGNC:5383]	1.32316e-14	-0.939663	0.191	0.42	2.52445e-10	Naive T	All other cells	ND1_7.Neftel_2019_10x Lymphocytes	0.663164	1.85303	0.1	1000
ANXA2	annexin A2 [Source:HGNC Symbol;Acc:HGNC:537]	1.34738e-14	-0.65913	0.358	0.573	2.57066e-10	Naive T	All other cells	ND1_7.Neftel_2019_10x Lymphocytes	1.57998	3.14759	0.1	1000
IL2RG	interleukin 2 receptor subunit gamma [Source:HGNC Symbol;Acc:HGNC:6010]	1.82691e-14	-0.475384	0.537	0.719	3.48557e-10	Naive T	All other cells	ND1_7.Neftel_2019_10x Lymphocytes	2.80384	4.57121	0.1	1000
UBE2L6	ubiquitin conjugating enzyme E2 L6 [Source:HGNC Symbol;Acc:HGNC:12490]	2.11779e-14	-0.763179	0.203	0.429	4.04052e-10	Naive T	All other cells	ND1_7.Neftel_2019_10x Lymphocytes	0.871133	1.98316	0.1	1000
NOSIP	nitric oxide synthase interacting protein [Source:HGNC Symbol;Acc:HGNC:17946]	2.28602e-14	0.823128	0.484	0.278	4.3615e-10	Naive T	All other cells	ND1_7.Neftel_2019_10x Lymphocytes	2.4768	1.03136	0.1	1000
DBI	diazepam binding inhibitor, acyl-CoA binding protein [Source:HGNC Symbol;Acc:HGNC:2690]	2.85769e-14	-0.541078	0.478	0.687	5.45219e-10	Naive T	All other cells	ND1_7.Neftel_2019_10x Lymphocytes	2.24748	3.93265	0.1	1000
COX5A	cytochrome c oxidase subunit 5A [Source:HGNC Symbol;Acc:HGNC:2267]	3.16845e-14	-0.680612	0.361	0.574	6.04509e-10	Naive T	All other cells	ND1_7.Neftel_2019_10x Lymphocytes	1.52507	3.10966	0.1	1000
PSME2	proteasome activator subunit 2 [Source:HGNC Symbol;Acc:HGNC:9569]	3.81772e-14	-0.66447	0.46	0.659	7.28382e-10	Naive T	All other cells	ND1_7.Neftel_2019_10x Lymphocytes	2.05848	4.09491	0.1	1000
ABI3	ABI family member 3 [Source:HGNC Symbol;Acc:HGNC:29859]	5.14718e-14	-1.07321	0.084	0.278	9.8203e-10	Naive T	All other cells	ND1_7.Neftel_2019_10x Lymphocytes	0.301686	1.07483	0.1	1000
ISG15	ISG15 ubiquitin like modifier [Source:HGNC Symbol;Acc:HGNC:4053]	5.34157e-14	-1.24389	0.385	0.57	1.01912e-09	Naive T	All other cells	ND1_7.Neftel_2019_10x Lymphocytes	2.05826	7.38722	0.1	1000
ALOX5AP	arachidonate 5-lipoxygenase activating protein [Source:HGNC Symbol;Acc:HGNC:436]	5.73908e-14	-0.646636	0.493	0.65	1.09496e-09	Naive T	All other cells	ND1_7.Neftel_2019_10x Lymphocytes	2.58727	5.0303	0.1	1000
APOBEC3H	apolipoprotein B mRNA editing enzyme catalytic subunit 3H [Source:HGNC Symbol;Acc:HGNC:24100]	6.1936e-14	-1.02973	0.051	0.232	1.18168e-09	Naive T	All other cells	ND1_7.Neftel_2019_10x Lymphocytes	0.274613	0.949034	0.1	1000
RPS21	ribosomal protein S21 [Source:HGNC Symbol;Acc:HGNC:10409]	6.37391e-14	0.26718	0.988	0.977	1.21608e-09	Naive T	All other cells	ND1_7.Neftel_2019_10x Lymphocytes	24.9104	19.0464	0.1	1000
KLRD1	killer cell lectin like receptor D1 [Source:HGNC Symbol;Acc:HGNC:6378]	9.25894e-14	-1.86547	0.033	0.218	1.76651e-09	Naive T	All other cells	ND1_7.Neftel_2019_10x Lymphocytes	0.201987	1.85053	0.1	1000
COTL1	coactosin like F-actin binding protein 1 [Source:HGNC Symbol;Acc:HGNC:18304]	1.05724e-13	-0.692582	0.552	0.703	2.0171e-09	Naive T	All other cells	ND1_7.Neftel_2019_10x Lymphocytes	2.96859	6.03371	0.1	1000
GSTP1	glutathione S-transferase pi 1 [Source:HGNC Symbol;Acc:HGNC:4638]	1.36872e-13	-0.856152	0.388	0.574	2.61137e-09	Naive T	All other cells	ND1_7.Neftel_2019_10x Lymphocytes	1.50312	3.67388	0.1	1000
PTTG1	PTTG1 regulator of sister chromatid separation, securin [Source:HGNC Symbol;Acc:HGNC:9690]	1.61902e-13	-1.19858	0.063	0.257	3.08893e-09	Naive T	All other cells	ND1_7.Neftel_2019_10x Lymphocytes	0.259973	1.09346	0.1	1000
GNLY	granulysin [Source:HGNC Symbol;Acc:HGNC:4414]	1.67672e-13	-2.46956	0.048	0.224	3.19901e-09	Naive T	All other cells	ND1_7.Neftel_2019_10x Lymphocytes	0.726648	9.66875	0.1	1000
RGS1	regulator of G protein signaling 1 [Source:HGNC Symbol;Acc:HGNC:9991]	1.73366e-13	-0.581921	0.534	0.715	3.30765e-09	Naive T	All other cells	ND1_7.Neftel_2019_10x Lymphocytes	5.64458	10.1798	0.1	1000
PSME1	proteasome activator subunit 1 [Source:HGNC Symbol;Acc:HGNC:9568]	2.30946e-13	-0.357984	0.776	0.847	4.40621e-09	Naive T	All other cells	ND1_7.Neftel_2019_10x Lymphocytes	4.85457	6.98723	0.1	1000
ARHGDIB	Rho GDP dissociation inhibitor beta [Source:HGNC Symbol;Acc:HGNC:679]	2.58201e-13	-0.303607	0.937	0.946	4.92622e-09	Naive T	All other cells	ND1_7.Neftel_2019_10x Lymphocytes	10.0107	13.5973	0.1	1000
STAT1	signal transducer and activator of transcription 1 [Source:HGNC Symbol;Acc:HGNC:11362]	3.90899e-13	-0.951127	0.137	0.325	7.45796e-09	Naive T	All other cells	ND1_7.Neftel_2019_10x Lymphocytes	0.592264	1.69201	0.1	1000
CALR	calreticulin [Source:HGNC Symbol;Acc:HGNC:1455]	4.05479e-13	-0.693613	0.352	0.577	7.73613e-09	Naive T	All other cells	ND1_7.Neftel_2019_10x Lymphocytes	1.5372	3.17593	0.1	1000
SERF2	small EDRK-rich factor 2 [Source:HGNC Symbol;Acc:HGNC:10757]	4.4368e-13	-0.282196	0.958	0.977	8.46497e-09	Naive T	All other cells	ND1_7.Neftel_2019_10x Lymphocytes	11.2589	14.9624	0.1	1000
IFI16	interferon gamma inducible protein 16 [Source:HGNC Symbol;Acc:HGNC:5395]	4.92741e-13	-0.678737	0.287	0.502	9.40101e-09	Naive T	All other cells	ND1_7.Neftel_2019_10x Lymphocytes	1.21885	2.49997	0.1	1000
LAG3	lymphocyte activating 3 [Source:HGNC Symbol;Acc:HGNC:6476]	5.01488e-13	-1.28667	0.069	0.267	9.56789e-09	Naive T	All other cells	ND1_7.Neftel_2019_10x Lymphocytes	0.310145	1.38501	0.1	1000
HLA-E	major histocompatibility complex, class I, E [Source:HGNC Symbol;Acc:HGNC:4962]	6.21242e-13	-0.299047	0.893	0.943	1.18527e-08	Naive T	All other cells	ND1_7.Neftel_2019_10x Lymphocytes	8.81598	11.9239	0.1	1000
UBL5	ubiquitin like 5 [Source:HGNC Symbol;Acc:HGNC:13736]	6.3645e-13	-0.426298	0.603	0.767	1.21428e-08	Naive T	All other cells	ND1_7.Neftel_2019_10x Lymphocytes	3.06869	4.75309	0.1	1000
ZNF683	zinc finger protein 683 [Source:HGNC Symbol;Acc:HGNC:28495]	6.66521e-13	-2.07806	0.015	0.167	1.27166e-08	Naive T	All other cells	ND1_7.Neftel_2019_10x Lymphocytes	0.0494877	1.09424	0.1	1000
TCF7	transcription factor 7 [Source:HGNC Symbol;Acc:HGNC:11639]	6.78408e-13	1.03051	0.167	0.052	1.29433e-08	Naive T	All other cells	ND1_7.Neftel_2019_10x Lymphocytes	0.661302	0.171651	0.1	1000
IFNG	interferon gamma [Source:HGNC Symbol;Acc:HGNC:5438]	8.71012e-13	-2.6632	0.024	0.182	1.6618e-08	Naive T	All other cells	ND1_7.Neftel_2019_10x Lymphocytes	0.126698	3.15135	0.1	1000
HOPX	HOP homeobox [Source:HGNC Symbol;Acc:HGNC:24961]	9.99922e-13	-1.05295	0.122	0.313	1.90775e-08	Naive T	All other cells	ND1_7.Neftel_2019_10x Lymphocytes	0.610168	1.9354	0.1	1000
GNG5	G protein subunit gamma 5 [Source:HGNC Symbol;Acc:HGNC:4408]	1.12009e-12	-0.582528	0.361	0.557	2.13701e-08	Naive T	All other cells	ND1_7.Neftel_2019_10x Lymphocytes	1.44632	2.66878	0.1	1000
BST2	bone marrow stromal cell antigen 2 [Source:HGNC Symbol;Acc:HGNC:1119]	1.15715e-12	-0.721737	0.322	0.51	2.20773e-08	Naive T	All other cells	ND1_7.Neftel_2019_10x Lymphocytes	1.34023	2.86401	0.1	1000
OASL	2'-5'-oligoadenylate synthetase like [Source:HGNC Symbol;Acc:HGNC:8090]	1.22927e-12	-1.34655	0.036	0.193	2.34533e-08	Naive T	All other cells	ND1_7.Neftel_2019_10x Lymphocytes	0.13434	0.800837	0.1	1000
HSPB11	heat shock protein family B (small) member 11 [Source:HGNC Symbol;Acc:HGNC:25019]	1.42724e-12	-0.830401	0.122	0.303	2.72303e-08	Naive T	All other cells	ND1_7.Neftel_2019_10x Lymphocytes	0.442343	1.14426	0.1	1000
MT-ND3	mitochondrially encoded NADH:ubiquinone oxidoreductase core subunit 3 [Source:HGNC Symbol;Acc:HGNC:7458]	1.5571e-12	0.317335	0.958	0.946	2.97078e-08	Naive T	All other cells	ND1_7.Neftel_2019_10x Lymphocytes	25.7662	18.7329	0.1	1000
LCK	LCK proto-oncogene, Src family tyrosine kinase [Source:HGNC Symbol;Acc:HGNC:6524]	1.64089e-12	-0.484789	0.49	0.648	3.13066e-08	Naive T	All other cells	ND1_7.Neftel_2019_10x Lymphocytes	2.19349	3.62424	0.1	1000
CHCHD2	coiled-coil-helix-coiled-coil-helix domain containing 2 [Source:HGNC Symbol;Acc:HGNC:21645]	1.69262e-12	-0.350671	0.77	0.864	3.22934e-08	Naive T	All other cells	ND1_7.Neftel_2019_10x Lymphocytes	4.92614	7.03722	0.1	1000
LINC00152		1.98218e-12	-0.845042	0.149	0.399	3.78179e-08	Naive T	All other cells	ND1_7.Neftel_2019_10x Lymphocytes	0.746228	1.87008	0.1	1000
MIR4435-2HG	MIR4435-2 host gene [Source:HGNC Symbol;Acc:HGNC:35163]	2.35239e-12	-0.993709	0.054	0.217	4.48813e-08	Naive T	All other cells	ND1_7.Neftel_2019_10x Lymphocytes	0.241599	0.822739	0.1	1000
HLA-DMA	major histocompatibility complex, class II, DM alpha [Source:HGNC Symbol;Acc:HGNC:4934]	2.72343e-12	-1.04261	0.099	0.281	5.19603e-08	Naive T	All other cells	ND1_7.Neftel_2019_10x Lymphocytes	0.340102	1.1484	0.1	1000
CMC1	C-X9-C motif containing 1 [Source:HGNC Symbol;Acc:HGNC:28783]	2.83712e-12	-1.40255	0.075	0.244	5.41295e-08	Naive T	All other cells	ND1_7.Neftel_2019_10x Lymphocytes	0.289912	1.48521	0.1	1000
ENO1	enolase 1 [Source:HGNC Symbol;Acc:HGNC:3350]	3.08714e-12	-0.583244	0.573	0.719	5.88995e-08	Naive T	All other cells	ND1_7.Neftel_2019_10x Lymphocytes	2.97024	5.40138	0.1	1000
EEF2	eukaryotic translation elongation factor 2 [Source:HGNC Symbol;Acc:HGNC:3214]	3.99229e-12	0.341745	0.881	0.826	7.6169e-08	Naive T	All other cells	ND1_7.Neftel_2019_10x Lymphocytes	9.56678	6.76853	0.1	1000
RASAL3	RAS protein activator like 3 [Source:HGNC Symbol;Acc:HGNC:26129]	4.14602e-12	-0.892147	0.128	0.335	7.91019e-08	Naive T	All other cells	ND1_7.Neftel_2019_10x Lymphocytes	0.471051	1.29357	0.1	1000
TRAPPC1	trafficking protein particle complex 1 [Source:HGNC Symbol;Acc:HGNC:19894]	4.37191e-12	-0.525278	0.442	0.606	8.34117e-08	Naive T	All other cells	ND1_7.Neftel_2019_10x Lymphocytes	1.74725	3.02358	0.1	1000
PDCD1	programmed cell death 1 [Source:HGNC Symbol;Acc:HGNC:8760]	4.59775e-12	-0.914039	0.057	0.226	8.77206e-08	Naive T	All other cells	ND1_7.Neftel_2019_10x Lymphocytes	0.319769	0.947062	0.1	1000
CD63	CD63 molecule [Source:HGNC Symbol;Acc:HGNC:1692]	5.54074e-12	-0.737522	0.379	0.54	1.05712e-07	Naive T	All other cells	ND1_7.Neftel_2019_10x Lymphocytes	1.51895	3.28481	0.1	1000
GZMM	granzyme M [Source:HGNC Symbol;Acc:HGNC:4712]	5.57609e-12	-0.740951	0.227	0.43	1.06386e-07	Naive T	All other cells	ND1_7.Neftel_2019_10x Lymphocytes	0.954823	2.11294	0.1	1000
PSMA4	proteasome 20S subunit alpha 4 [Source:HGNC Symbol;Acc:HGNC:9533]	5.93951e-12	-0.728535	0.248	0.442	1.1332e-07	Naive T	All other cells	ND1_7.Neftel_2019_10x Lymphocytes	0.908492	1.98964	0.1	1000
PARK7	Parkinsonism associated deglycase [Source:HGNC Symbol;Acc:HGNC:16369]	6.21771e-12	-0.480595	0.516	0.665	1.18628e-07	Naive T	All other cells	ND1_7.Neftel_2019_10x Lymphocytes	2.35066	3.8628	0.1	1000
IL2RB	interleukin 2 receptor subunit beta [Source:HGNC Symbol;Acc:HGNC:6009]	6.42478e-12	-0.884243	0.096	0.276	1.22578e-07	Naive T	All other cells	ND1_7.Neftel_2019_10x Lymphocytes	0.390087	1.08657	0.1	1000
WIPF1	WAS/WASL interacting protein family member 1 [Source:HGNC Symbol;Acc:HGNC:12736]	7.61673e-12	-0.598636	0.278	0.482	1.4532e-07	Naive T	All other cells	ND1_7.Neftel_2019_10x Lymphocytes	1.11832	2.1169	0.1	1000
RARRES3		8.62246e-12	-0.543333	0.57	0.722	1.64508e-07	Naive T	All other cells	ND1_7.Neftel_2019_10x Lymphocytes	2.95966	5.16792	0.1	1000
C12orf75	chromosome 12 open reading frame 75 [Source:HGNC Symbol;Acc:HGNC:35164]	8.76949e-12	-0.838004	0.146	0.335	1.67313e-07	Naive T	All other cells	ND1_7.Neftel_2019_10x Lymphocytes	0.563418	1.43365	0.1	1000
MT-CYB	mitochondrially encoded cytochrome b [Source:HGNC Symbol;Acc:HGNC:7427]	9.0188e-12	0.266059	1	0.975	1.7207e-07	Naive T	All other cells	ND1_7.Neftel_2019_10x Lymphocytes	40.5001	31.0157	0.1	1000
GNG2	G protein subunit gamma 2 [Source:HGNC Symbol;Acc:HGNC:4404]	9.43071e-12	-0.667294	0.164	0.36	1.79929e-07	Naive T	All other cells	ND1_7.Neftel_2019_10x Lymphocytes	0.735266	1.5279	0.1	1000
DUSP4	dual specificity phosphatase 4 [Source:HGNC Symbol;Acc:HGNC:3070]	9.4336e-12	-0.992724	0.099	0.281	1.79984e-07	Naive T	All other cells	ND1_7.Neftel_2019_10x Lymphocytes	0.625584	1.85804	0.1	1000
TERF2IP	TERF2 interacting protein [Source:HGNC Symbol;Acc:HGNC:19246]	1.06389e-11	-0.548996	0.299	0.486	2.02979e-07	Naive T	All other cells	ND1_7.Neftel_2019_10x Lymphocytes	1.1737	2.10542	0.1	1000
HN1		1.21106e-11	-0.638116	0.239	0.448	2.31058e-07	Naive T	All other cells	ND1_7.Neftel_2019_10x Lymphocytes	0.962296	1.91083	0.1	1000
HMGN2	high mobility group nucleosomal binding domain 2 [Source:HGNC Symbol;Acc:HGNC:4986]	1.21598e-11	-0.597169	0.531	0.677	2.31997e-07	Naive T	All other cells	ND1_7.Neftel_2019_10x Lymphocytes	2.59816	4.80247	0.1	1000
RAB27A	RAB27A, member RAS oncogene family [Source:HGNC Symbol;Acc:HGNC:9766]	1.28259e-11	-0.744782	0.093	0.27	2.44705e-07	Naive T	All other cells	ND1_7.Neftel_2019_10x Lymphocytes	0.40864	0.971188	0.1	1000
CD96	CD96 molecule [Source:HGNC Symbol;Acc:HGNC:16892]	1.50127e-11	-0.603108	0.248	0.452	2.86427e-07	Naive T	All other cells	ND1_7.Neftel_2019_10x Lymphocytes	1.06668	2.03244	0.1	1000
ATP5G3		1.70874e-11	-0.410509	0.496	0.649	3.26011e-07	Naive T	All other cells	ND1_7.Neftel_2019_10x Lymphocytes	2.29662	3.51311	0.1	1000
SAMD9L	sterile alpha motif domain containing 9 like [Source:HGNC Symbol;Acc:HGNC:1349]	2.02872e-11	-1.14125	0.069	0.22	3.8706e-07	Naive T	All other cells	ND1_7.Neftel_2019_10x Lymphocytes	0.240822	0.967006	0.1	1000
IFI35	interferon induced protein 35 [Source:HGNC Symbol;Acc:HGNC:5399]	2.05955e-11	-1.04405	0.099	0.269	3.92941e-07	Naive T	All other cells	ND1_7.Neftel_2019_10x Lymphocytes	0.340134	1.15029	0.1	1000
GUK1	guanylate kinase 1 [Source:HGNC Symbol;Acc:HGNC:4693]	2.08558e-11	-0.381773	0.561	0.755	3.97908e-07	Naive T	All other cells	ND1_7.Neftel_2019_10x Lymphocytes	3.10137	4.58963	0.1	1000
HERPUD1	homocysteine inducible ER protein with ubiquitin like domain 1 [Source:HGNC Symbol;Acc:HGNC:13744]	2.13454e-11	-0.417044	0.373	0.573	4.0725e-07	Naive T	All other cells	ND1_7.Neftel_2019_10x Lymphocytes	2.22397	3.42655	0.1	1000
XCL2	X-C motif chemokine ligand 2 [Source:HGNC Symbol;Acc:HGNC:10646]	2.52688e-11	-2.40311	0.015	0.155	4.82104e-07	Naive T	All other cells	ND1_7.Neftel_2019_10x Lymphocytes	0.0722927	1.80513	0.1	1000
HNRNPA2B1	heterogeneous nuclear ribonucleoprotein A2/B1 [Source:HGNC Symbol;Acc:HGNC:5033]	2.61125e-11	-0.423357	0.645	0.765	4.98201e-07	Naive T	All other cells	ND1_7.Neftel_2019_10x Lymphocytes	3.5448	5.4659	0.1	1000
RNF167	ring finger protein 167 [Source:HGNC Symbol;Acc:HGNC:24544]	3.03393e-11	-0.762928	0.182	0.369	5.78843e-07	Naive T	All other cells	ND1_7.Neftel_2019_10x Lymphocytes	0.614946	1.43323	0.1	1000
REEP5	receptor accessory protein 5 [Source:HGNC Symbol;Acc:HGNC:30077]	3.05546e-11	-0.502664	0.299	0.488	5.82951e-07	Naive T	All other cells	ND1_7.Neftel_2019_10x Lymphocytes	1.20651	2.05981	0.1	1000
MT-ND2	mitochondrially encoded NADH:ubiquinone oxidoreductase core subunit 2 [Source:HGNC Symbol;Acc:HGNC:7456]	3.07994e-11	0.31019	0.946	0.918	5.87622e-07	Naive T	All other cells	ND1_7.Neftel_2019_10x Lymphocytes	30.4926	22.3338	0.1	1000
WDR83OS	WD repeat domain 83 opposite strand [Source:HGNC Symbol;Acc:HGNC:30203]	3.61782e-11	-0.617992	0.325	0.535	6.90244e-07	Naive T	All other cells	ND1_7.Neftel_2019_10x Lymphocytes	1.26024	2.42352	0.1	1000
ACTN4	actinin alpha 4 [Source:HGNC Symbol;Acc:HGNC:166]	4.22203e-11	-0.895128	0.101	0.26	8.05521e-07	Naive T	All other cells	ND1_7.Neftel_2019_10x Lymphocytes	0.333492	0.961036	0.1	1000
MSN	moesin [Source:HGNC Symbol;Acc:HGNC:7373]	4.23514e-11	-0.589503	0.328	0.541	8.08023e-07	Naive T	All other cells	ND1_7.Neftel_2019_10x Lymphocytes	1.42693	2.6532	0.1	1000
TMEM123	transmembrane protein 123 [Source:HGNC Symbol;Acc:HGNC:30138]	4.71684e-11	0.599948	0.469	0.288	8.99926e-07	Naive T	All other cells	ND1_7.Neftel_2019_10x Lymphocytes	2.01072	1.05845	0.1	1000
UBB	ubiquitin B [Source:HGNC Symbol;Acc:HGNC:12463]	4.85867e-11	-0.372708	0.806	0.885	9.26985e-07	Naive T	All other cells	ND1_7.Neftel_2019_10x Lymphocytes	6.67274	9.73172	0.1	1000
GBP1	guanylate binding protein 1 [Source:HGNC Symbol;Acc:HGNC:4182]	5.07235e-11	-1.06245	0.093	0.246	9.67753e-07	Naive T	All other cells	ND1_7.Neftel_2019_10x Lymphocytes	0.333472	1.15423	0.1	1000
PRELID1	PRELI domain containing 1 [Source:HGNC Symbol;Acc:HGNC:30255]	5.19382e-11	-0.544888	0.37	0.54	9.90929e-07	Naive T	All other cells	ND1_7.Neftel_2019_10x Lymphocytes	1.42142	2.52355	0.1	1000
LDHB	lactate dehydrogenase B [Source:HGNC Symbol;Acc:HGNC:6541]	5.50846e-11	0.364036	0.806	0.731	1.05096e-06	Naive T	All other cells	ND1_7.Neftel_2019_10x Lymphocytes	6.5785	4.54066	0.1	1000
ITM2A	integral membrane protein 2A [Source:HGNC Symbol;Acc:HGNC:6173]	6.02279e-11	-0.730037	0.263	0.45	1.14909e-06	Naive T	All other cells	ND1_7.Neftel_2019_10x Lymphocytes	1.09453	2.37885	0.1	1000
BRK1	BRICK1 subunit of SCAR/WAVE actin nucleating complex [Source:HGNC Symbol;Acc:HGNC:23057]	6.05836e-11	-0.514888	0.475	0.655	1.15588e-06	Naive T	All other cells	ND1_7.Neftel_2019_10x Lymphocytes	2.00474	3.42217	0.1	1000
FABP5	fatty acid binding protein 5 [Source:HGNC Symbol;Acc:HGNC:3560]	7.60164e-11	-1.18012	0.078	0.25	1.45032e-06	Naive T	All other cells	ND1_7.Neftel_2019_10x Lymphocytes	0.265491	1.08959	0.1	1000
PLEK	pleckstrin [Source:HGNC Symbol;Acc:HGNC:9070]	7.94842e-11	-1.59997	0.015	0.137	1.51648e-06	Naive T	All other cells	ND1_7.Neftel_2019_10x Lymphocytes	0.0405026	0.595891	0.1	1000
COX6A1	cytochrome c oxidase subunit 6A1 [Source:HGNC Symbol;Acc:HGNC:2277]	9.30737e-11	-0.420424	0.576	0.722	1.77575e-06	Naive T	All other cells	ND1_7.Neftel_2019_10x Lymphocytes	2.80914	4.32947	0.1	1000
HLA-DRB5	major histocompatibility complex, class II, DR beta 5 [Source:HGNC Symbol;Acc:HGNC:4953]	9.55743e-11	-1.52899	0.06	0.213	1.82346e-06	Naive T	All other cells	ND1_7.Neftel_2019_10x Lymphocytes	0.315102	1.81507	0.1	1000
IQGAP1	IQ motif containing GTPase activating protein 1 [Source:HGNC Symbol;Acc:HGNC:6110]	9.87145e-11	-0.787089	0.14	0.327	1.88337e-06	Naive T	All other cells	ND1_7.Neftel_2019_10x Lymphocytes	0.477358	1.16845	0.1	1000
RPL23	ribosomal protein L23 [Source:HGNC Symbol;Acc:HGNC:10316]	1.0281e-10	0.315596	0.887	0.879	1.96152e-06	Naive T	All other cells	ND1_7.Neftel_2019_10x Lymphocytes	17.705	12.8861	0.1	1000
ATP5B		1.07555e-10	-0.490187	0.349	0.518	2.05205e-06	Naive T	All other cells	ND1_7.Neftel_2019_10x Lymphocytes	1.3915	2.33506	0.1	1000
PSMB8	proteasome 20S subunit beta 8 [Source:HGNC Symbol;Acc:HGNC:9545]	1.122e-10	-0.511928	0.442	0.588	2.14067e-06	Naive T	All other cells	ND1_7.Neftel_2019_10x Lymphocytes	1.83718	3.13219	0.1	1000
CARD16	caspase recruitment domain family member 16 [Source:HGNC Symbol;Acc:HGNC:33701]	1.16519e-10	-0.638287	0.251	0.431	2.22307e-06	Naive T	All other cells	ND1_7.Neftel_2019_10x Lymphocytes	0.994548	1.97224	0.1	1000
CLIC3	chloride intracellular channel 3 [Source:HGNC Symbol;Acc:HGNC:2064]	1.66053e-10	-1.38851	0.042	0.18	3.16813e-06	Naive T	All other cells	ND1_7.Neftel_2019_10x Lymphocytes	0.155947	0.926059	0.1	1000
PTMS	parathymosin [Source:HGNC Symbol;Acc:HGNC:9629]	1.75702e-10	-1.10334	0.069	0.226	3.35221e-06	Naive T	All other cells	ND1_7.Neftel_2019_10x Lymphocytes	0.238458	0.920185	0.1	1000
STMN1	stathmin 1 [Source:HGNC Symbol;Acc:HGNC:6510]	2.04262e-10	-1.47385	0.075	0.25	3.89711e-06	Naive T	All other cells	ND1_7.Neftel_2019_10x Lymphocytes	0.31237	1.70042	0.1	1000
PSMD8	proteasome 26S subunit, non-ATPase 8 [Source:HGNC Symbol;Acc:HGNC:9566]	2.04437e-10	-0.633613	0.266	0.458	3.90046e-06	Naive T	All other cells	ND1_7.Neftel_2019_10x Lymphocytes	0.971819	1.91974	0.1	1000
RPS11	ribosomal protein S11 [Source:HGNC Symbol;Acc:HGNC:10384]	2.1226e-10	0.252487	0.94	0.942	4.0497e-06	Naive T	All other cells	ND1_7.Neftel_2019_10x Lymphocytes	21.9252	17.0106	0.1	1000
RPL36A	ribosomal protein L36a [Source:HGNC Symbol;Acc:HGNC:10359]	2.25697e-10	0.370605	0.806	0.702	4.30608e-06	Naive T	All other cells	ND1_7.Neftel_2019_10x Lymphocytes	6.93367	4.75546	0.1	1000
TAP1	transporter 1, ATP binding cassette subfamily B member [Source:HGNC Symbol;Acc:HGNC:43]	2.57692e-10	-0.640223	0.248	0.431	4.9165e-06	Naive T	All other cells	ND1_7.Neftel_2019_10x Lymphocytes	0.979637	1.94797	0.1	1000
BLOC1S1	biogenesis of lysosomal organelles complex 1 subunit 1 [Source:HGNC Symbol;Acc:HGNC:4200]	2.76569e-10	-0.609157	0.275	0.444	5.27667e-06	Naive T	All other cells	ND1_7.Neftel_2019_10x Lymphocytes	1.04789	2.01083	0.1	1000
RHOA	ras homolog family member A [Source:HGNC Symbol;Acc:HGNC:667]	2.85315e-10	-0.347995	0.561	0.726	5.44353e-06	Naive T	All other cells	ND1_7.Neftel_2019_10x Lymphocytes	3.18846	4.5572	0.1	1000
PSMB3	proteasome 20S subunit beta 3 [Source:HGNC Symbol;Acc:HGNC:9540]	3.19475e-10	-0.580895	0.343	0.535	6.09526e-06	Naive T	All other cells	ND1_7.Neftel_2019_10x Lymphocytes	1.31538	2.43019	0.1	1000
UBE2L3	ubiquitin conjugating enzyme E2 L3 [Source:HGNC Symbol;Acc:HGNC:12488]	3.20221e-10	-0.570945	0.293	0.469	6.10949e-06	Naive T	All other cells	ND1_7.Neftel_2019_10x Lymphocytes	1.13767	2.0906	0.1	1000
SELL	selectin L [Source:HGNC Symbol;Acc:HGNC:10720]	3.44636e-10	0.781686	0.218	0.097	6.57531e-06	Naive T	All other cells	ND1_7.Neftel_2019_10x Lymphocytes	0.94527	0.37835	0.1	1000
HSPA1A	heat shock protein family A (Hsp70) member 1A [Source:HGNC Symbol;Acc:HGNC:5232]	3.52604e-10	-1.11374	0.197	0.365	6.72733e-06	Naive T	All other cells	ND1_7.Neftel_2019_10x Lymphocytes	4.77027	14.7335	0.1	1000
CLTA	clathrin light chain A [Source:HGNC Symbol;Acc:HGNC:2090]	3.56698e-10	-0.586891	0.2	0.38	6.80544e-06	Naive T	All other cells	ND1_7.Neftel_2019_10x Lymphocytes	0.723951	1.38179	0.1	1000
HLA-DQA1	major histocompatibility complex, class II, DQ alpha 1 [Source:HGNC Symbol;Acc:HGNC:4942]	3.6433e-10	-1.46911	0.033	0.167	6.95105e-06	Naive T	All other cells	ND1_7.Neftel_2019_10x Lymphocytes	0.133893	0.916348	0.1	1000
CD3D	CD3d molecule [Source:HGNC Symbol;Acc:HGNC:1673]	3.83291e-10	-0.302002	0.851	0.847	7.31281e-06	Naive T	All other cells	ND1_7.Neftel_2019_10x Lymphocytes	7.9037	10.7255	0.1	1000
PSMB6	proteasome 20S subunit beta 6 [Source:HGNC Symbol;Acc:HGNC:9543]	4.16508e-10	-0.572041	0.275	0.447	7.94656e-06	Naive T	All other cells	ND1_7.Neftel_2019_10x Lymphocytes	0.986079	1.8244	0.1	1000
PPIA	peptidylprolyl isomerase A [Source:HGNC Symbol;Acc:HGNC:9253]	4.96533e-10	-0.299021	0.884	0.92	9.47335e-06	Naive T	All other cells	ND1_7.Neftel_2019_10x Lymphocytes	7.79145	10.5419	0.1	1000
LSM2	LSM2 homolog, U6 small nuclear RNA and mRNA degradation associated [Source:HGNC Symbol;Acc:HGNC:13940]	5.69898e-10	-0.71983	0.164	0.345	1.08731e-05	Naive T	All other cells	ND1_7.Neftel_2019_10x Lymphocytes	0.561711	1.25921	0.1	1000
HMGB1	high mobility group box 1 [Source:HGNC Symbol;Acc:HGNC:4983]	7.09284e-10	-0.350125	0.758	0.867	1.35324e-05	Naive T	All other cells	ND1_7.Neftel_2019_10x Lymphocytes	5.55517	7.92607	0.1	1000
HLA-DQB1	major histocompatibility complex, class II, DQ beta 1 [Source:HGNC Symbol;Acc:HGNC:4944]	7.18945e-10	-1.12184	0.104	0.253	1.37167e-05	Naive T	All other cells	ND1_7.Neftel_2019_10x Lymphocytes	0.355153	1.29754	0.1	1000
SRSF2	serine and arginine rich splicing factor 2 [Source:HGNC Symbol;Acc:HGNC:10783]	8.70986e-10	-0.45389	0.37	0.557	1.66175e-05	Naive T	All other cells	ND1_7.Neftel_2019_10x Lymphocytes	1.75354	2.81826	0.1	1000
PSMA5	proteasome 20S subunit alpha 5 [Source:HGNC Symbol;Acc:HGNC:9534]	8.75535e-10	-0.629053	0.221	0.397	1.67043e-05	Naive T	All other cells	ND1_7.Neftel_2019_10x Lymphocytes	0.788981	1.56758	0.1	1000
NDUFS6	NADH:ubiquinone oxidoreductase subunit S6 [Source:HGNC Symbol;Acc:HGNC:7713]	9.38177e-10	-0.549038	0.266	0.446	1.78995e-05	Naive T	All other cells	ND1_7.Neftel_2019_10x Lymphocytes	1.00128	1.80696	0.1	1000
GTF3C6	general transcription factor IIIC subunit 6 [Source:HGNC Symbol;Acc:HGNC:20872]	1.05932e-09	-0.701916	0.173	0.342	2.02107e-05	Naive T	All other cells	ND1_7.Neftel_2019_10x Lymphocytes	0.582992	1.27802	0.1	1000
TCEB2		1.10016e-09	-0.414183	0.582	0.723	2.09899e-05	Naive T	All other cells	ND1_7.Neftel_2019_10x Lymphocytes	2.75826	4.22493	0.1	1000
NOP10	NOP10 ribonucleoprotein [Source:HGNC Symbol;Acc:HGNC:14378]	1.17666e-09	-0.449548	0.31	0.531	2.24496e-05	Naive T	All other cells	ND1_7.Neftel_2019_10x Lymphocytes	1.42568	2.29166	0.1	1000
TOMM7	translocase of outer mitochondrial membrane 7 [Source:HGNC Symbol;Acc:HGNC:21648]	1.25232e-09	0.256042	0.925	0.891	2.3893e-05	Naive T	All other cells	ND1_7.Neftel_2019_10x Lymphocytes	10.519	8.12023	0.1	1000
JUNB	JunB proto-oncogene, AP-1 transcription factor subunit [Source:HGNC Symbol;Acc:HGNC:6205]	1.25249e-09	0.267604	0.893	0.805	2.38963e-05	Naive T	All other cells	ND1_7.Neftel_2019_10x Lymphocytes	29.9516	22.8958	0.1	1000
PPDPF	pancreatic progenitor cell differentiation and proliferation factor [Source:HGNC Symbol;Acc:HGNC:16142]	1.27543e-09	-0.333425	0.746	0.846	2.4334e-05	Naive T	All other cells	ND1_7.Neftel_2019_10x Lymphocytes	5.10163	7.16013	0.1	1000
ARPP19	cAMP regulated phosphoprotein 19 [Source:HGNC Symbol;Acc:HGNC:16967]	1.27581e-09	-0.764081	0.096	0.238	2.43411e-05	Naive T	All other cells	ND1_7.Neftel_2019_10x Lymphocytes	0.320897	0.803675	0.1	1000
CLEC2B	C-type lectin domain family 2 member B [Source:HGNC Symbol;Acc:HGNC:2053]	1.36735e-09	-0.503929	0.394	0.539	2.60876e-05	Naive T	All other cells	ND1_7.Neftel_2019_10x Lymphocytes	1.68019	2.84659	0.1	1000
MATK	megakaryocyte-associated tyrosine kinase [Source:HGNC Symbol;Acc:HGNC:6906]	1.38616e-09	-1.06133	0.075	0.213	2.64466e-05	Naive T	All other cells	ND1_7.Neftel_2019_10x Lymphocytes	0.238238	0.877581	0.1	1000
CXCR3	C-X-C motif chemokine receptor 3 [Source:HGNC Symbol;Acc:HGNC:4540]	1.41107e-09	-0.727453	0.14	0.316	2.69219e-05	Naive T	All other cells	ND1_7.Neftel_2019_10x Lymphocytes	0.593835	1.3361	0.1	1000
PSMB10	proteasome 20S subunit beta 10 [Source:HGNC Symbol;Acc:HGNC:9538]	1.43588e-09	-0.696036	0.173	0.358	2.73952e-05	Naive T	All other cells	ND1_7.Neftel_2019_10x Lymphocytes	0.682791	1.47011	0.1	1000
CDKN2A	cyclin dependent kinase inhibitor 2A [Source:HGNC Symbol;Acc:HGNC:1787]	1.49723e-09	-1.05544	0.042	0.178	2.85656e-05	Naive T	All other cells	ND1_7.Neftel_2019_10x Lymphocytes	0.161743	0.652046	0.1	1000
ARPC5	actin related protein 2/3 complex subunit 5 [Source:HGNC Symbol;Acc:HGNC:708]	1.54868e-09	-0.480721	0.409	0.57	2.95473e-05	Naive T	All other cells	ND1_7.Neftel_2019_10x Lymphocytes	1.72638	2.85369	0.1	1000
PLAC8	placenta associated 8 [Source:HGNC Symbol;Acc:HGNC:19254]	1.66199e-09	0.536054	0.293	0.139	3.1709e-05	Naive T	All other cells	ND1_7.Neftel_2019_10x Lymphocytes	1.15102	0.63191	0.1	1000
TPM3	tropomyosin 3 [Source:HGNC Symbol;Acc:HGNC:12012]	1.70698e-09	-0.368535	0.531	0.692	3.25675e-05	Naive T	All other cells	ND1_7.Neftel_2019_10x Lymphocytes	2.67196	3.90718	0.1	1000
TNFRSF1B	TNF receptor superfamily member 1B [Source:HGNC Symbol;Acc:HGNC:11917]	1.73659e-09	-0.648082	0.131	0.299	3.31324e-05	Naive T	All other cells	ND1_7.Neftel_2019_10x Lymphocytes	0.559525	1.16093	0.1	1000
WDR1	WD repeat domain 1 [Source:HGNC Symbol;Acc:HGNC:12754]	1.94857e-09	-0.644337	0.227	0.414	3.71768e-05	Naive T	All other cells	ND1_7.Neftel_2019_10x Lymphocytes	0.850424	1.7103	0.1	1000
SH2D2A	SH2 domain containing 2A [Source:HGNC Symbol;Acc:HGNC:10821]	2.00658e-09	-0.681025	0.176	0.383	3.82836e-05	Naive T	All other cells	ND1_7.Neftel_2019_10x Lymphocytes	0.835438	1.74833	0.1	1000
PLA2G16		2.00943e-09	-0.98215	0.069	0.235	3.8338e-05	Naive T	All other cells	ND1_7.Neftel_2019_10x Lymphocytes	0.268894	0.885016	0.1	1000
ARPC5L	actin related protein 2/3 complex subunit 5 like [Source:HGNC Symbol;Acc:HGNC:23366]	2.25561e-09	-0.613679	0.245	0.419	4.30349e-05	Naive T	All other cells	ND1_7.Neftel_2019_10x Lymphocytes	0.91805	1.78056	0.1	1000
LGALS3	galectin 3 [Source:HGNC Symbol;Acc:HGNC:6563]	2.4507e-09	-0.629572	0.218	0.388	4.67569e-05	Naive T	All other cells	ND1_7.Neftel_2019_10x Lymphocytes	0.96685	1.90227	0.1	1000
YARS		2.53907e-09	-1.2272	0.03	0.16	4.84429e-05	Naive T	All other cells	ND1_7.Neftel_2019_10x Lymphocytes	0.0918263	0.55445	0.1	1000
CALM3	calmodulin 3 [Source:HGNC Symbol;Acc:HGNC:1449]	2.58917e-09	-0.468007	0.325	0.538	4.93988e-05	Naive T	All other cells	ND1_7.Neftel_2019_10x Lymphocytes	1.55881	2.5488	0.1	1000
CD52	CD52 molecule [Source:HGNC Symbol;Acc:HGNC:1804]	2.84688e-09	-0.25361	0.955	0.944	5.43156e-05	Naive T	All other cells	ND1_7.Neftel_2019_10x Lymphocytes	17.5151	22.6	0.1	1000
SEPT7		3.67234e-09	-0.479072	0.501	0.651	7.00646e-05	Naive T	All other cells	ND1_7.Neftel_2019_10x Lymphocytes	2.20149	3.61593	0.1	1000
PMAIP1	phorbol-12-myristate-13-acetate-induced protein 1 [Source:HGNC Symbol;Acc:HGNC:9108]	4.30934e-09	-0.954449	0.101	0.252	8.22179e-05	Naive T	All other cells	ND1_7.Neftel_2019_10x Lymphocytes	0.46455	1.36627	0.1	1000
PYHIN1	pyrin and HIN domain family member 1 [Source:HGNC Symbol;Acc:HGNC:28894]	4.35467e-09	-0.923166	0.093	0.237	8.30828e-05	Naive T	All other cells	ND1_7.Neftel_2019_10x Lymphocytes	0.322376	0.963226	0.1	1000
MAPK1	mitogen-activated protein kinase 1 [Source:HGNC Symbol;Acc:HGNC:6871]	4.40058e-09	-1.09885	0.045	0.168	8.39587e-05	Naive T	All other cells	ND1_7.Neftel_2019_10x Lymphocytes	0.135792	0.607547	0.1	1000
GBP5	guanylate binding protein 5 [Source:HGNC Symbol;Acc:HGNC:19895]	4.63844e-09	-0.863237	0.078	0.21	8.84968e-05	Naive T	All other cells	ND1_7.Neftel_2019_10x Lymphocytes	0.321656	0.899672	0.1	1000
LEF1	lymphoid enhancer binding factor 1 [Source:HGNC Symbol;Acc:HGNC:6551]	4.69169e-09	0.732486	0.164	0.072	8.95128e-05	Naive T	All other cells	ND1_7.Neftel_2019_10x Lymphocytes	0.641611	0.256502	0.1	1000
YWHAQ	tyrosine 3-monooxygenase/tryptophan 5-monooxygenase activation protein theta [Source:HGNC Symbol;Acc:HGNC:12854]	4.76352e-09	-0.504632	0.31	0.5	9.08832e-05	Naive T	All other cells	ND1_7.Neftel_2019_10x Lymphocytes	1.3778	2.3478	0.1	1000
SUMO2	small ubiquitin like modifier 2 [Source:HGNC Symbol;Acc:HGNC:11125]	4.77483e-09	-0.312514	0.71	0.835	9.10989e-05	Naive T	All other cells	ND1_7.Neftel_2019_10x Lymphocytes	4.47359	6.15144	0.1	1000
XCL1	X-C motif chemokine ligand 1 [Source:HGNC Symbol;Acc:HGNC:10645]	4.78009e-09	-1.6761	0.021	0.132	9.11994e-05	Naive T	All other cells	ND1_7.Neftel_2019_10x Lymphocytes	0.181617	1.40515	0.1	1000
RPS10	ribosomal protein S10 [Source:HGNC Symbol;Acc:HGNC:10383]	5.68307e-09	0.373632	0.716	0.647	0.000108427	Naive T	All other cells	ND1_7.Neftel_2019_10x Lymphocytes	8.09539	5.54032	0.1	1000
BSG	basigin (Ok blood group) [Source:HGNC Symbol;Acc:HGNC:1116]	5.94933e-09	-0.559382	0.242	0.43	0.000113507	Naive T	All other cells	ND1_7.Neftel_2019_10x Lymphocytes	0.935968	1.71252	0.1	1000
LPAR6	lysophosphatidic acid receptor 6 [Source:HGNC Symbol;Acc:HGNC:15520]	6.13403e-09	0.76974	0.218	0.103	0.000117031	Naive T	All other cells	ND1_7.Neftel_2019_10x Lymphocytes	0.875385	0.351734	0.1	1000
C4orf48	chromosome 4 open reading frame 48 [Source:HGNC Symbol;Acc:HGNC:34437]	6.40415e-09	-0.500923	0.188	0.338	0.000122185	Naive T	All other cells	ND1_7.Neftel_2019_10x Lymphocytes	0.745731	1.29566	0.1	1000
ARHGAP18	Rho GTPase activating protein 18 [Source:HGNC Symbol;Acc:HGNC:21035]	6.65586e-09	-1.00067	0.036	0.149	0.000126987	Naive T	All other cells	ND1_7.Neftel_2019_10x Lymphocytes	0.121662	0.502942	0.1	1000
LYST	lysosomal trafficking regulator [Source:HGNC Symbol;Acc:HGNC:1968]	6.69367e-09	-1.02539	0.057	0.186	0.000127709	Naive T	All other cells	ND1_7.Neftel_2019_10x Lymphocytes	0.216783	0.78325	0.1	1000
TRGC2	T cell receptor gamma constant 2 [Source:HGNC Symbol;Acc:HGNC:12276]	6.74651e-09	-1.15527	0.048	0.163	0.000128717	Naive T	All other cells	ND1_7.Neftel_2019_10x Lymphocytes	0.220894	0.918804	0.1	1000
PPIB	peptidylprolyl isomerase B [Source:HGNC Symbol;Acc:HGNC:9255]	6.76084e-09	-0.367166	0.609	0.712	0.00012899	Naive T	All other cells	ND1_7.Neftel_2019_10x Lymphocytes	3.062	4.46478	0.1	1000
FERMT3	fermitin family member 3 [Source:HGNC Symbol;Acc:HGNC:23151]	6.98626e-09	-0.651667	0.152	0.32	0.000133291	Naive T	All other cells	ND1_7.Neftel_2019_10x Lymphocytes	0.532452	1.11351	0.1	1000
SCP2	sterol carrier protein 2 [Source:HGNC Symbol;Acc:HGNC:10606]	7.10823e-09	-0.556615	0.221	0.389	0.000135618	Naive T	All other cells	ND1_7.Neftel_2019_10x Lymphocytes	0.798907	1.46837	0.1	1000
SNHG8	small nucleolar RNA host gene 8 [Source:HGNC Symbol;Acc:HGNC:33098]	7.33433e-09	0.417558	0.603	0.466	0.000139932	Naive T	All other cells	ND1_7.Neftel_2019_10x Lymphocytes	3.08275	1.99633	0.1	1000
LDHA	lactate dehydrogenase A [Source:HGNC Symbol;Acc:HGNC:6535]	7.397e-09	-0.416281	0.594	0.712	0.000141127	Naive T	All other cells	ND1_7.Neftel_2019_10x Lymphocytes	3.38204	5.17986	0.1	1000
PTPN22	protein tyrosine phosphatase non-receptor type 22 [Source:HGNC Symbol;Acc:HGNC:9652]	7.69892e-09	-0.776563	0.104	0.246	0.000146888	Naive T	All other cells	ND1_7.Neftel_2019_10x Lymphocytes	0.35825	0.89623	0.1	1000
CD247	CD247 molecule [Source:HGNC Symbol;Acc:HGNC:1677]	8.50685e-09	-0.631412	0.304	0.477	0.000162302	Naive T	All other cells	ND1_7.Neftel_2019_10x Lymphocytes	1.16264	2.2741	0.1	1000
MAP3K8	mitogen-activated protein kinase kinase kinase 8 [Source:HGNC Symbol;Acc:HGNC:6860]	8.91325e-09	-0.683155	0.093	0.231	0.000170056	Naive T	All other cells	ND1_7.Neftel_2019_10x Lymphocytes	0.547443	1.18201	0.1	1000
HNRNPF	heterogeneous nuclear ribonucleoprotein F [Source:HGNC Symbol;Acc:HGNC:5039]	9.05044e-09	-0.42259	0.352	0.518	0.000172673	Naive T	All other cells	ND1_7.Neftel_2019_10x Lymphocytes	1.50315	2.34625	0.1	1000
PSMA3	proteasome 20S subunit alpha 3 [Source:HGNC Symbol;Acc:HGNC:9532]	9.10634e-09	-0.732258	0.14	0.308	0.00017374	Naive T	All other cells	ND1_7.Neftel_2019_10x Lymphocytes	0.489192	1.12538	0.1	1000
AKNA	AT-hook transcription factor [Source:HGNC Symbol;Acc:HGNC:24108]	9.65538e-09	-0.610784	0.134	0.289	0.000184215	Naive T	All other cells	ND1_7.Neftel_2019_10x Lymphocytes	0.570979	1.13586	0.1	1000
ACTR3	actin related protein 3 [Source:HGNC Symbol;Acc:HGNC:170]	9.87663e-09	-0.482869	0.418	0.57	0.000188436	Naive T	All other cells	ND1_7.Neftel_2019_10x Lymphocytes	1.76477	2.92227	0.1	1000
CD38	CD38 molecule [Source:HGNC Symbol;Acc:HGNC:1667]	1.00755e-08	-1.39916	0.009	0.114	0.000192231	Naive T	All other cells	ND1_7.Neftel_2019_10x Lymphocytes	0.0431608	0.480056	0.1	1000
NAP1L1	nucleosome assembly protein 1 like 1 [Source:HGNC Symbol;Acc:HGNC:7637]	1.03427e-08	0.371326	0.716	0.589	0.000197329	Naive T	All other cells	ND1_7.Neftel_2019_10x Lymphocytes	4.70521	3.21473	0.1	1000
TRABD2A	TraB domain containing 2A [Source:HGNC Symbol;Acc:HGNC:27013]	1.05723e-08	0.90269	0.101	0.029	0.000201709	Naive T	All other cells	ND1_7.Neftel_2019_10x Lymphocytes	0.356811	0.0852266	0.1	1000
SNX3	sorting nexin 3 [Source:HGNC Symbol;Acc:HGNC:11174]	1.14096e-08	-0.458749	0.319	0.484	0.000217684	Naive T	All other cells	ND1_7.Neftel_2019_10x Lymphocytes	1.25034	2.03636	0.1	1000
PGAM1	phosphoglycerate mutase 1 [Source:HGNC Symbol;Acc:HGNC:8888]	1.1902e-08	-0.468446	0.367	0.527	0.000227079	Naive T	All other cells	ND1_7.Neftel_2019_10x Lymphocytes	1.45172	2.37889	0.1	1000
CAPZB	capping actin protein of muscle Z-line subunit beta [Source:HGNC Symbol;Acc:HGNC:1491]	1.34949e-08	-0.315066	0.609	0.718	0.000257469	Naive T	All other cells	ND1_7.Neftel_2019_10x Lymphocytes	3.08814	4.26887	0.1	1000
CCR5	C-C motif chemokine receptor 5 [Source:HGNC Symbol;Acc:HGNC:1606]	1.57808e-08	-1.10664	0.018	0.125	0.000301082	Naive T	All other cells	ND1_7.Neftel_2019_10x Lymphocytes	0.0745141	0.427761	0.1	1000
SASH3	SAM and SH3 domain containing 3 [Source:HGNC Symbol;Acc:HGNC:15975]	1.58415e-08	-0.671634	0.087	0.225	0.00030224	Naive T	All other cells	ND1_7.Neftel_2019_10x Lymphocytes	0.349325	0.779524	0.1	1000
TESC	tescalcin [Source:HGNC Symbol;Acc:HGNC:26065]	1.62309e-08	-0.988187	0.03	0.147	0.00030967	Naive T	All other cells	ND1_7.Neftel_2019_10x Lymphocytes	0.106241	0.454037	0.1	1000
EPSTI1	epithelial stromal interaction 1 [Source:HGNC Symbol;Acc:HGNC:16465]	1.64775e-08	-0.870689	0.075	0.205	0.000314375	Naive T	All other cells	ND1_7.Neftel_2019_10x Lymphocytes	0.320595	0.904616	0.1	1000
RAN	RAN, member RAS oncogene family [Source:HGNC Symbol;Acc:HGNC:9846]	1.69084e-08	-0.365858	0.552	0.699	0.000322595	Naive T	All other cells	ND1_7.Neftel_2019_10x Lymphocytes	2.87886	4.19478	0.1	1000
CPNE7	copine 7 [Source:HGNC Symbol;Acc:HGNC:2320]	1.71856e-08	-0.926342	0.036	0.153	0.000327885	Naive T	All other cells	ND1_7.Neftel_2019_10x Lymphocytes	0.162622	0.563187	0.1	1000
POLR2L	RNA polymerase II, I and III subunit L [Source:HGNC Symbol;Acc:HGNC:9199]	2.02981e-08	-0.518812	0.397	0.568	0.000387267	Naive T	All other cells	ND1_7.Neftel_2019_10x Lymphocytes	1.5747	2.71355	0.1	1000
ICAM2	intercellular adhesion molecule 2 [Source:HGNC Symbol;Acc:HGNC:5345]	2.14144e-08	0.607944	0.26	0.14	0.000408565	Naive T	All other cells	ND1_7.Neftel_2019_10x Lymphocytes	0.937085	0.464661	0.1	1000
SNRPG	small nuclear ribonucleoprotein polypeptide G [Source:HGNC Symbol;Acc:HGNC:11163]	2.46863e-08	-0.47776	0.409	0.561	0.000470989	Naive T	All other cells	ND1_7.Neftel_2019_10x Lymphocytes	1.61153	2.65977	0.1	1000
AP2S1	adaptor related protein complex 2 subunit sigma 1 [Source:HGNC Symbol;Acc:HGNC:565]	2.54176e-08	-0.543744	0.242	0.424	0.000484943	Naive T	All other cells	ND1_7.Neftel_2019_10x Lymphocytes	0.902034	1.62595	0.1	1000
IFI6	interferon alpha inducible protein 6 [Source:HGNC Symbol;Acc:HGNC:4054]	2.69346e-08	-0.910146	0.257	0.398	0.000513886	Naive T	All other cells	ND1_7.Neftel_2019_10x Lymphocytes	1.30152	3.38233	0.1	1000
PSMB2	proteasome 20S subunit beta 2 [Source:HGNC Symbol;Acc:HGNC:9539]	2.7844e-08	-0.560209	0.218	0.382	0.000531236	Naive T	All other cells	ND1_7.Neftel_2019_10x Lymphocytes	0.795919	1.46879	0.1	1000
C20orf24		3.05718e-08	-0.595246	0.14	0.293	0.000583279	Naive T	All other cells	ND1_7.Neftel_2019_10x Lymphocytes	0.537405	1.05592	0.1	1000
SAMD3	sterile alpha motif domain containing 3 [Source:HGNC Symbol;Acc:HGNC:21574]	3.34426e-08	-0.713551	0.072	0.209	0.000638052	Naive T	All other cells	ND1_7.Neftel_2019_10x Lymphocytes	0.349868	0.818283	0.1	1000
C5orf56		3.43219e-08	-0.804574	0.096	0.244	0.000654827	Naive T	All other cells	ND1_7.Neftel_2019_10x Lymphocytes	0.390099	0.995737	0.1	1000
USMG5		3.50162e-08	-0.37375	0.445	0.589	0.000668075	Naive T	All other cells	ND1_7.Neftel_2019_10x Lymphocytes	1.88552	2.7853	0.1	1000
TOB1	transducer of ERBB2, 1 [Source:HGNC Symbol;Acc:HGNC:11979]	3.61493e-08	0.508175	0.418	0.248	0.000689693	Naive T	All other cells	ND1_7.Neftel_2019_10x Lymphocytes	2.17278	1.26728	0.1	1000
TMBIM6	transmembrane BAX inhibitor motif containing 6 [Source:HGNC Symbol;Acc:HGNC:11723]	4.41868e-08	-0.383442	0.487	0.636	0.00084304	Naive T	All other cells	ND1_7.Neftel_2019_10x Lymphocytes	2.30945	3.43545	0.1	1000
WAS	WASP actin nucleation promoting factor [Source:HGNC Symbol;Acc:HGNC:12731]	4.94482e-08	-0.561086	0.203	0.368	0.000943423	Naive T	All other cells	ND1_7.Neftel_2019_10x Lymphocytes	0.745371	1.38158	0.1	1000
OAS1	2'-5'-oligoadenylate synthetase 1 [Source:HGNC Symbol;Acc:HGNC:8086]	5.02983e-08	-1.1271	0.054	0.153	0.000959641	Naive T	All other cells	ND1_7.Neftel_2019_10x Lymphocytes	0.174541	0.747425	0.1	1000
NDUFA4	NDUFA4 mitochondrial complex associated [Source:HGNC Symbol;Acc:HGNC:7687]	5.03046e-08	-0.281725	0.713	0.79	0.000959762	Naive T	All other cells	ND1_7.Neftel_2019_10x Lymphocytes	4.06923	5.42595	0.1	1000
BIRC3	baculoviral IAP repeat containing 3 [Source:HGNC Symbol;Acc:HGNC:591]	5.08962e-08	0.392395	0.352	0.188	0.000971048	Naive T	All other cells	ND1_7.Neftel_2019_10x Lymphocytes	1.40463	0.91628	0.1	1000
SLBP	stem-loop binding protein [Source:HGNC Symbol;Acc:HGNC:10904]	5.13581e-08	-0.710459	0.125	0.271	0.000979862	Naive T	All other cells	ND1_7.Neftel_2019_10x Lymphocytes	0.458181	1.03586	0.1	1000
NDUFS7	NADH:ubiquinone oxidoreductase core subunit S7 [Source:HGNC Symbol;Acc:HGNC:7714]	5.22494e-08	-0.491598	0.215	0.375	0.000996866	Naive T	All other cells	ND1_7.Neftel_2019_10x Lymphocytes	0.815689	1.39709	0.1	1000
FAM49B		5.36078e-08	-0.489606	0.275	0.435	0.00102278	Naive T	All other cells	ND1_7.Neftel_2019_10x Lymphocytes	1.05528	1.78503	0.1	1000
COX6C	cytochrome c oxidase subunit 6C [Source:HGNC Symbol;Acc:HGNC:2285]	6.48548e-08	-0.285411	0.663	0.77	0.00123736	Naive T	All other cells	ND1_7.Neftel_2019_10x Lymphocytes	3.80566	5.09573	0.1	1000
PHF11	PHD finger protein 11 [Source:HGNC Symbol;Acc:HGNC:17024]	6.6762e-08	-0.716886	0.107	0.235	0.00127375	Naive T	All other cells	ND1_7.Neftel_2019_10x Lymphocytes	0.371407	0.865463	0.1	1000
RAC1	Rac family small GTPase 1 [Source:HGNC Symbol;Acc:HGNC:9801]	7.07226e-08	-0.616349	0.263	0.434	0.00134932	Naive T	All other cells	ND1_7.Neftel_2019_10x Lymphocytes	0.954674	1.85342	0.1	1000
SAMSN1	SAM domain, SH3 domain and nuclear localization signals 1 [Source:HGNC Symbol;Acc:HGNC:10528]	7.12349e-08	-0.450485	0.266	0.449	0.00135909	Naive T	All other cells	ND1_7.Neftel_2019_10x Lymphocytes	1.29246	2.08488	0.1	1000
ATP5J		7.26065e-08	-0.356661	0.424	0.581	0.00138526	Naive T	All other cells	ND1_7.Neftel_2019_10x Lymphocytes	1.86496	2.70704	0.1	1000
COX7B	cytochrome c oxidase subunit 7B [Source:HGNC Symbol;Acc:HGNC:2291]	7.36838e-08	-0.473077	0.439	0.6	0.00140581	Naive T	All other cells	ND1_7.Neftel_2019_10x Lymphocytes	1.83196	3.00065	0.1	1000
SHFM1		7.50789e-08	-0.422102	0.358	0.517	0.00143243	Naive T	All other cells	ND1_7.Neftel_2019_10x Lymphocytes	1.52519	2.37869	0.1	1000
RUNX3	RUNX family transcription factor 3 [Source:HGNC Symbol;Acc:HGNC:10473]	8.23117e-08	-0.574124	0.185	0.337	0.00157042	Naive T	All other cells	ND1_7.Neftel_2019_10x Lymphocytes	0.684988	1.29381	0.1	1000
OSM	oncostatin M [Source:HGNC Symbol;Acc:HGNC:8506]	8.43496e-08	0.581762	0.191	0.084	0.00160931	Naive T	All other cells	ND1_7.Neftel_2019_10x Lymphocytes	0.717207	0.356747	0.1	1000
EIF4EBP1	eukaryotic translation initiation factor 4E binding protein 1 [Source:HGNC Symbol;Acc:HGNC:3288]	8.5518e-08	-0.785701	0.045	0.158	0.0016316	Naive T	All other cells	ND1_7.Neftel_2019_10x Lymphocytes	0.185061	0.525408	0.1	1000
ANXA5	annexin A5 [Source:HGNC Symbol;Acc:HGNC:543]	8.66528e-08	-0.610776	0.251	0.413	0.00165325	Naive T	All other cells	ND1_7.Neftel_2019_10x Lymphocytes	0.939409	1.81445	0.1	1000
CALM1	calmodulin 1 [Source:HGNC Symbol;Acc:HGNC:1442]	9.13891e-08	-0.270005	0.839	0.891	0.00174361	Naive T	All other cells	ND1_7.Neftel_2019_10x Lymphocytes	6.7419	8.86269	0.1	1000
ARF1	ADP ribosylation factor 1 [Source:HGNC Symbol;Acc:HGNC:652]	9.24055e-08	-0.35716	0.418	0.574	0.001763	Naive T	All other cells	ND1_7.Neftel_2019_10x Lymphocytes	1.84964	2.68655	0.1	1000
SYTL3	synaptotagmin like 3 [Source:HGNC Symbol;Acc:HGNC:15587]	9.25811e-08	-0.520235	0.17	0.339	0.00176635	Naive T	All other cells	ND1_7.Neftel_2019_10x Lymphocytes	0.913687	1.60545	0.1	1000
PDIA3	protein disulfide isomerase family A member 3 [Source:HGNC Symbol;Acc:HGNC:4606]	9.34886e-08	-0.478639	0.364	0.502	0.00178367	Naive T	All other cells	ND1_7.Neftel_2019_10x Lymphocytes	1.42127	2.35514	0.1	1000
SKA2	spindle and kinetochore associated complex subunit 2 [Source:HGNC Symbol;Acc:HGNC:28006]	9.62263e-08	-0.726745	0.066	0.186	0.0018359	Naive T	All other cells	ND1_7.Neftel_2019_10x Lymphocytes	0.243413	0.610294	0.1	1000
ITGB2	integrin subunit beta 2 [Source:HGNC Symbol;Acc:HGNC:6155]	9.7283e-08	-0.520298	0.4	0.529	0.00185606	Naive T	All other cells	ND1_7.Neftel_2019_10x Lymphocytes	1.69064	2.9128	0.1	1000
GSTO1	glutathione S-transferase omega 1 [Source:HGNC Symbol;Acc:HGNC:13312]	9.79566e-08	-0.567252	0.218	0.366	0.00186891	Naive T	All other cells	ND1_7.Neftel_2019_10x Lymphocytes	0.769365	1.43305	0.1	1000
CACYBP	calcyclin binding protein [Source:HGNC Symbol;Acc:HGNC:30423]	9.99947e-08	-0.625184	0.2	0.344	0.0019078	Naive T	All other cells	ND1_7.Neftel_2019_10x Lymphocytes	0.789989	1.56302	0.1	1000
PIN1	peptidylprolyl cis/trans isomerase, NIMA-interacting 1 [Source:HGNC Symbol;Acc:HGNC:8988]	1.01419e-07	-0.559275	0.173	0.339	0.00193498	Naive T	All other cells	ND1_7.Neftel_2019_10x Lymphocytes	0.676771	1.25889	0.1	1000
PGK1	phosphoglycerate kinase 1 [Source:HGNC Symbol;Acc:HGNC:8896]	1.02264e-07	-0.424359	0.504	0.638	0.0019511	Naive T	All other cells	ND1_7.Neftel_2019_10x Lymphocytes	2.44598	3.79181	0.1	1000
PPP1CC	protein phosphatase 1 catalytic subunit gamma [Source:HGNC Symbol;Acc:HGNC:9283]	1.08202e-07	-0.618465	0.17	0.334	0.00206439	Naive T	All other cells	ND1_7.Neftel_2019_10x Lymphocytes	0.619101	1.23471	0.1	1000
KXD1	KxDL motif containing 1 [Source:HGNC Symbol;Acc:HGNC:28420]	1.08883e-07	-0.815095	0.072	0.196	0.00207739	Naive T	All other cells	ND1_7.Neftel_2019_10x Lymphocytes	0.234065	0.654784	0.1	1000
MRPL51	mitochondrial ribosomal protein L51 [Source:HGNC Symbol;Acc:HGNC:14044]	1.28495e-07	-0.556759	0.227	0.388	0.00245156	Naive T	All other cells	ND1_7.Neftel_2019_10x Lymphocytes	0.803087	1.47589	0.1	1000
SNX10	sorting nexin 10 [Source:HGNC Symbol;Acc:HGNC:14974]	1.3189e-07	-0.888143	0.03	0.126	0.00251632	Naive T	All other cells	ND1_7.Neftel_2019_10x Lymphocytes	0.11032	0.411205	0.1	1000
FKBP1A	FKBP prolyl isomerase 1A [Source:HGNC Symbol;Acc:HGNC:3711]	1.32875e-07	-0.428734	0.376	0.53	0.00253513	Naive T	All other cells	ND1_7.Neftel_2019_10x Lymphocytes	1.54247	2.4217	0.1	1000
TBCB	tubulin folding cofactor B [Source:HGNC Symbol;Acc:HGNC:1989]	1.37212e-07	-0.417088	0.304	0.451	0.00261787	Naive T	All other cells	ND1_7.Neftel_2019_10x Lymphocytes	1.16	1.81209	0.1	1000
VAMP8	vesicle associated membrane protein 8 [Source:HGNC Symbol;Acc:HGNC:12647]	1.41518e-07	-0.387027	0.484	0.618	0.00270003	Naive T	All other cells	ND1_7.Neftel_2019_10x Lymphocytes	2.09928	3.13866	0.1	1000
BTG3	BTG anti-proliferation factor 3 [Source:HGNC Symbol;Acc:HGNC:1132]	1.45104e-07	-0.692877	0.09	0.235	0.00276844	Naive T	All other cells	ND1_7.Neftel_2019_10x Lymphocytes	0.430051	0.959815	0.1	1000
CDC42	cell division cycle 42 [Source:HGNC Symbol;Acc:HGNC:1736]	1.47218e-07	-0.377564	0.43	0.591	0.00280878	Naive T	All other cells	ND1_7.Neftel_2019_10x Lymphocytes	2.02579	3.00094	0.1	1000
YWHAB	tyrosine 3-monooxygenase/tryptophan 5-monooxygenase activation protein beta [Source:HGNC Symbol;Acc:HGNC:12849]	1.81301e-07	-0.357128	0.57	0.7	0.00345904	Naive T	All other cells	ND1_7.Neftel_2019_10x Lymphocytes	2.93624	4.23945	0.1	1000
GHITM	growth hormone inducible transmembrane protein [Source:HGNC Symbol;Acc:HGNC:17281]	1.92311e-07	-0.392139	0.272	0.414	0.0036691	Naive T	All other cells	ND1_7.Neftel_2019_10x Lymphocytes	1.02639	1.56722	0.1	1000
SH3YL1	SH3 and SYLF domain containing 1 [Source:HGNC Symbol;Acc:HGNC:29546]	2.00466e-07	0.774278	0.185	0.093	0.00382469	Naive T	All other cells	ND1_7.Neftel_2019_10x Lymphocytes	0.740528	0.287514	0.1	1000
HAVCR2	hepatitis A virus cellular receptor 2 [Source:HGNC Symbol;Acc:HGNC:18437]	2.07002e-07	-0.981317	0.033	0.139	0.00394939	Naive T	All other cells	ND1_7.Neftel_2019_10x Lymphocytes	0.131041	0.516409	0.1	1000
SCAMP2	secretory carrier membrane protein 2 [Source:HGNC Symbol;Acc:HGNC:10564]	2.07164e-07	-0.57806	0.14	0.278	0.00395248	Naive T	All other cells	ND1_7.Neftel_2019_10x Lymphocytes	0.521596	1.00804	0.1	1000
SNRPB	small nuclear ribonucleoprotein polypeptides B and B1 [Source:HGNC Symbol;Acc:HGNC:11153]	2.10532e-07	-0.4201	0.424	0.558	0.00401675	Naive T	All other cells	ND1_7.Neftel_2019_10x Lymphocytes	1.75994	2.73105	0.1	1000
MCM5	minichromosome maintenance complex component 5 [Source:HGNC Symbol;Acc:HGNC:6948]	2.14474e-07	-1.07354	0.021	0.108	0.00409196	Naive T	All other cells	ND1_7.Neftel_2019_10x Lymphocytes	0.0589005	0.364898	0.1	1000
IFIT3	interferon induced protein with tetratricopeptide repeats 3 [Source:HGNC Symbol;Acc:HGNC:5411]	2.16185e-07	-1.57558	0.024	0.108	0.00412459	Naive T	All other cells	ND1_7.Neftel_2019_10x Lymphocytes	0.0955853	0.845366	0.1	1000
APOBEC3C	apolipoprotein B mRNA editing enzyme catalytic subunit 3C [Source:HGNC Symbol;Acc:HGNC:17353]	2.35289e-07	-0.727452	0.176	0.322	0.00448907	Naive T	All other cells	ND1_7.Neftel_2019_10x Lymphocytes	0.667189	1.48793	0.1	1000
ANAPC11	anaphase promoting complex subunit 11 [Source:HGNC Symbol;Acc:HGNC:14452]	2.37354e-07	-0.449041	0.284	0.457	0.00452847	Naive T	All other cells	ND1_7.Neftel_2019_10x Lymphocytes	1.20716	1.94807	0.1	1000
SMC4	structural maintenance of chromosomes 4 [Source:HGNC Symbol;Acc:HGNC:14013]	2.4344e-07	-0.985231	0.051	0.161	0.00464459	Naive T	All other cells	ND1_7.Neftel_2019_10x Lymphocytes	0.144316	0.554384	0.1	1000
PTPRC	protein tyrosine phosphatase receptor type C [Source:HGNC Symbol;Acc:HGNC:9666]	2.45556e-07	-0.26438	0.707	0.832	0.00468496	Naive T	All other cells	ND1_7.Neftel_2019_10x Lymphocytes	4.90024	6.41343	0.1	1000
PTPN7	protein tyrosine phosphatase non-receptor type 7 [Source:HGNC Symbol;Acc:HGNC:9659]	2.57403e-07	-0.611898	0.167	0.321	0.00491099	Naive T	All other cells	ND1_7.Neftel_2019_10x Lymphocytes	0.654201	1.29069	0.1	1000
DOCK8	dedicator of cytokinesis 8 [Source:HGNC Symbol;Acc:HGNC:19191]	2.5875e-07	-0.559459	0.143	0.271	0.00493669	Naive T	All other cells	ND1_7.Neftel_2019_10x Lymphocytes	0.526268	0.995797	0.1	1000
NFATC2	nuclear factor of activated T cells 2 [Source:HGNC Symbol;Acc:HGNC:7776]	2.61701e-07	-0.68974	0.075	0.183	0.00499299	Naive T	All other cells	ND1_7.Neftel_2019_10x Lymphocytes	0.371597	0.839985	0.1	1000
HNRNPM	heterogeneous nuclear ribonucleoprotein M [Source:HGNC Symbol;Acc:HGNC:5046]	2.64574e-07	-0.556054	0.245	0.407	0.00504781	Naive T	All other cells	ND1_7.Neftel_2019_10x Lymphocytes	0.918069	1.67529	0.1	1000
CD70	CD70 molecule [Source:HGNC Symbol;Acc:HGNC:11937]	2.88702e-07	-1.36693	0.042	0.161	0.00550815	Naive T	All other cells	ND1_7.Neftel_2019_10x Lymphocytes	0.130288	0.803487	0.1	1000
AKIRIN2	akirin 2 [Source:HGNC Symbol;Acc:HGNC:21407]	3.00875e-07	-0.594256	0.134	0.267	0.00574039	Naive T	All other cells	ND1_7.Neftel_2019_10x Lymphocytes	0.565803	1.10622	0.1	1000
CALM2	calmodulin 2 [Source:HGNC Symbol;Acc:HGNC:1445]	3.02793e-07	-0.310836	0.663	0.757	0.00577699	Naive T	All other cells	ND1_7.Neftel_2019_10x Lymphocytes	3.73349	5.13105	0.1	1000
RBCK1	RANBP2-type and C3HC4-type zinc finger containing 1 [Source:HGNC Symbol;Acc:HGNC:15864]	3.12977e-07	-0.600341	0.179	0.332	0.00597128	Naive T	All other cells	ND1_7.Neftel_2019_10x Lymphocytes	0.68535	1.33149	0.1	1000
SRSF3	serine and arginine rich splicing factor 3 [Source:HGNC Symbol;Acc:HGNC:10785]	3.21989e-07	-0.359222	0.421	0.552	0.00614322	Naive T	All other cells	ND1_7.Neftel_2019_10x Lymphocytes	1.86805	2.71868	0.1	1000
SH2D1A	SH2 domain containing 1A [Source:HGNC Symbol;Acc:HGNC:10820]	3.24579e-07	-0.674603	0.134	0.26	0.00619265	Naive T	All other cells	ND1_7.Neftel_2019_10x Lymphocytes	0.503437	1.0847	0.1	1000
DNAJC1	DnaJ heat shock protein family (Hsp40) member C1 [Source:HGNC Symbol;Acc:HGNC:20090]	3.31317e-07	-0.62462	0.104	0.234	0.00632119	Naive T	All other cells	ND1_7.Neftel_2019_10x Lymphocytes	0.401729	0.836998	0.1	1000
SNRPD3	small nuclear ribonucleoprotein D3 polypeptide [Source:HGNC Symbol;Acc:HGNC:11160]	3.67255e-07	-0.399907	0.248	0.39	0.00700686	Naive T	All other cells	ND1_7.Neftel_2019_10x Lymphocytes	0.97492	1.50344	0.1	1000
COX6B1	cytochrome c oxidase subunit 6B1 [Source:HGNC Symbol;Acc:HGNC:2280]	3.69555e-07	-0.274808	0.69	0.782	0.00705074	Naive T	All other cells	ND1_7.Neftel_2019_10x Lymphocytes	3.88002	5.13881	0.1	1000
TOX	thymocyte selection associated high mobility group box [Source:HGNC Symbol;Acc:HGNC:18988]	3.77941e-07	-0.65188	0.03	0.128	0.00721074	Naive T	All other cells	ND1_7.Neftel_2019_10x Lymphocytes	0.210536	0.495964	0.1	1000
MOB1A	MOB kinase activator 1A [Source:HGNC Symbol;Acc:HGNC:16015]	3.8229e-07	-0.592814	0.14	0.29	0.00729371	Naive T	All other cells	ND1_7.Neftel_2019_10x Lymphocytes	0.529115	1.03812	0.1	1000
PPP4C	protein phosphatase 4 catalytic subunit [Source:HGNC Symbol;Acc:HGNC:9319]	4.02497e-07	-0.488157	0.23	0.395	0.00767923	Naive T	All other cells	ND1_7.Neftel_2019_10x Lymphocytes	0.874458	1.4877	0.1	1000
COMMD8	COMM domain containing 8 [Source:HGNC Symbol;Acc:HGNC:26036]	4.07077e-07	-0.586035	0.131	0.254	0.00776662	Naive T	All other cells	ND1_7.Neftel_2019_10x Lymphocytes	0.426249	0.845589	0.1	1000
COPE	COPI coat complex subunit epsilon [Source:HGNC Symbol;Acc:HGNC:2234]	4.11964e-07	-0.41458	0.376	0.534	0.00785986	Naive T	All other cells	ND1_7.Neftel_2019_10x Lymphocytes	1.58462	2.45006	0.1	1000
YWHAZ	tyrosine 3-monooxygenase/tryptophan 5-monooxygenase activation protein zeta [Source:HGNC Symbol;Acc:HGNC:12855]	4.2168e-07	-0.366927	0.513	0.656	0.00804523	Naive T	All other cells	ND1_7.Neftel_2019_10x Lymphocytes	2.62793	3.83721	0.1	1000
SURF4	surfeit 4 [Source:HGNC Symbol;Acc:HGNC:11476]	4.23401e-07	-0.549135	0.125	0.256	0.00807808	Naive T	All other cells	ND1_7.Neftel_2019_10x Lymphocytes	0.443159	0.840618	0.1	1000
DOK2	docking protein 2 [Source:HGNC Symbol;Acc:HGNC:2991]	4.3814e-07	-0.476144	0.221	0.378	0.00835927	Naive T	All other cells	ND1_7.Neftel_2019_10x Lymphocytes	0.950428	1.59104	0.1	1000
CLTB	clathrin light chain B [Source:HGNC Symbol;Acc:HGNC:2091]	4.52809e-07	-0.494503	0.194	0.337	0.00863914	Naive T	All other cells	ND1_7.Neftel_2019_10x Lymphocytes	0.692227	1.199	0.1	1000
SLA2	Src like adaptor 2 [Source:HGNC Symbol;Acc:HGNC:17329]	4.59111e-07	-0.771311	0.099	0.226	0.00875938	Naive T	All other cells	ND1_7.Neftel_2019_10x Lymphocytes	0.319107	0.806361	0.1	1000
ARRB2	arrestin beta 2 [Source:HGNC Symbol;Acc:HGNC:712]	4.72321e-07	-0.501686	0.191	0.356	0.00901141	Naive T	All other cells	ND1_7.Neftel_2019_10x Lymphocytes	0.774254	1.34383	0.1	1000
PTPN6	protein tyrosine phosphatase non-receptor type 6 [Source:HGNC Symbol;Acc:HGNC:9658]	4.86193e-07	-0.652203	0.125	0.25	0.00927608	Naive T	All other cells	ND1_7.Neftel_2019_10x Lymphocytes	0.423222	0.904464	0.1	1000
ELOF1	elongation factor 1 homolog [Source:HGNC Symbol;Acc:HGNC:28691]	4.93552e-07	-0.705912	0.087	0.199	0.00941648	Naive T	All other cells	ND1_7.Neftel_2019_10x Lymphocytes	0.265117	0.639615	0.1	1000
HSD17B10	hydroxysteroid 17-beta dehydrogenase 10 [Source:HGNC Symbol;Acc:HGNC:4800]	4.97453e-07	-0.653648	0.146	0.287	0.00949091	Naive T	All other cells	ND1_7.Neftel_2019_10x Lymphocytes	0.470752	0.997295	0.1	1000
GLIPR2	GLI pathogenesis related 2 [Source:HGNC Symbol;Acc:HGNC:18007]	5.0155e-07	-0.525185	0.179	0.318	0.00956908	Naive T	All other cells	ND1_7.Neftel_2019_10x Lymphocytes	0.661878	1.18816	0.1	1000
MAGOH	mago homolog, exon junction complex subunit [Source:HGNC Symbol;Acc:HGNC:6815]	5.05807e-07	-0.412967	0.227	0.348	0.0096503	Naive T	All other cells	ND1_7.Neftel_2019_10x Lymphocytes	0.806288	1.26967	0.1	1000
ISG20	interferon stimulated exonuclease gene 20 [Source:HGNC Symbol;Acc:HGNC:6130]	5.10056e-07	-0.52004	0.657	0.733	0.00973136	Naive T	All other cells	ND1_7.Neftel_2019_10x Lymphocytes	3.96973	6.74566	0.1	1000
LAP3	leucine aminopeptidase 3 [Source:HGNC Symbol;Acc:HGNC:18449]	5.23976e-07	-0.86822	0.078	0.209	0.00999693	Naive T	All other cells	ND1_7.Neftel_2019_10x Lymphocytes	0.271208	0.784464	0.1	1000
ALDOA	aldolase, fructose-bisphosphate A [Source:HGNC Symbol;Acc:HGNC:414]	5.37172e-07	-0.258517	0.737	0.802	0.0102487	Naive T	All other cells	ND1_7.Neftel_2019_10x Lymphocytes	4.49359	5.84874	0.1	1000
RPS27L	ribosomal protein S27 like [Source:HGNC Symbol;Acc:HGNC:18476]	5.37643e-07	-0.484014	0.46	0.586	0.0102577	Naive T	All other cells	ND1_7.Neftel_2019_10x Lymphocytes	2.19259	3.6199	0.1	1000
RBPJ	recombination signal binding protein for immunoglobulin kappa J region [Source:HGNC Symbol;Acc:HGNC:5724]	5.58565e-07	-0.792609	0.099	0.237	0.0106569	Naive T	All other cells	ND1_7.Neftel_2019_10x Lymphocytes	0.365129	0.92754	0.1	1000
RBX1	ring-box 1 [Source:HGNC Symbol;Acc:HGNC:9928]	5.85962e-07	-0.387447	0.427	0.563	0.0111796	Naive T	All other cells	ND1_7.Neftel_2019_10x Lymphocytes	1.76141	2.64225	0.1	1000
ANXA6	annexin A6 [Source:HGNC Symbol;Acc:HGNC:544]	6.41445e-07	-0.372027	0.346	0.485	0.0122381	Naive T	All other cells	ND1_7.Neftel_2019_10x Lymphocytes	1.42875	2.11772	0.1	1000
RNF213	ring finger protein 213 [Source:HGNC Symbol;Acc:HGNC:14539]	6.85173e-07	-0.417491	0.299	0.445	0.0130724	Naive T	All other cells	ND1_7.Neftel_2019_10x Lymphocytes	1.39784	2.17394	0.1	1000
PANK2	pantothenate kinase 2 [Source:HGNC Symbol;Acc:HGNC:15894]	7.00946e-07	-0.895296	0.024	0.109	0.0133733	Naive T	All other cells	ND1_7.Neftel_2019_10x Lymphocytes	0.0782683	0.336412	0.1	1000
TMEM160	transmembrane protein 160 [Source:HGNC Symbol;Acc:HGNC:26042]	7.04983e-07	-0.449555	0.233	0.365	0.0134504	Naive T	All other cells	ND1_7.Neftel_2019_10x Lymphocytes	0.802434	1.31467	0.1	1000
PSMD13	proteasome 26S subunit, non-ATPase 13 [Source:HGNC Symbol;Acc:HGNC:9558]	7.05458e-07	-0.516598	0.164	0.299	0.0134594	Naive T	All other cells	ND1_7.Neftel_2019_10x Lymphocytes	0.580843	1.04131	0.1	1000
IKZF3	IKAROS family zinc finger 3 [Source:HGNC Symbol;Acc:HGNC:13178]	7.18607e-07	-0.567303	0.119	0.233	0.0137103	Naive T	All other cells	ND1_7.Neftel_2019_10x Lymphocytes	0.453681	0.876418	0.1	1000
RILPL2	Rab interacting lysosomal protein like 2 [Source:HGNC Symbol;Acc:HGNC:28787]	7.22089e-07	-0.572111	0.146	0.266	0.0137767	Naive T	All other cells	ND1_7.Neftel_2019_10x Lymphocytes	0.694919	1.3086	0.1	1000
LDLRAD4	low density lipoprotein receptor class A domain containing 4 [Source:HGNC Symbol;Acc:HGNC:1224]	7.27139e-07	-0.678742	0.084	0.21	0.0138731	Naive T	All other cells	ND1_7.Neftel_2019_10x Lymphocytes	0.363991	0.814709	0.1	1000
FNBP1	formin binding protein 1 [Source:HGNC Symbol;Acc:HGNC:17069]	7.3108e-07	-0.439376	0.29	0.413	0.0139483	Naive T	All other cells	ND1_7.Neftel_2019_10x Lymphocytes	1.05775	1.69653	0.1	1000
TYMP	thymidine phosphorylase [Source:HGNC Symbol;Acc:HGNC:3148]	7.39751e-07	-0.679205	0.188	0.331	0.0141137	Naive T	All other cells	ND1_7.Neftel_2019_10x Lymphocytes	0.691827	1.46173	0.1	1000
FKBP8	FKBP prolyl isomerase 8 [Source:HGNC Symbol;Acc:HGNC:3724]	7.49396e-07	-0.363769	0.343	0.497	0.0142977	Naive T	All other cells	ND1_7.Neftel_2019_10x Lymphocytes	1.42362	2.0921	0.1	1000
RAB8A	RAB8A, member RAS oncogene family [Source:HGNC Symbol;Acc:HGNC:7007]	7.79192e-07	-0.621408	0.131	0.267	0.0148662	Naive T	All other cells	ND1_7.Neftel_2019_10x Lymphocytes	0.455334	0.93378	0.1	1000
PLSCR1	phospholipid scramblase 1 [Source:HGNC Symbol;Acc:HGNC:9092]	7.83202e-07	-0.760191	0.072	0.182	0.0149427	Naive T	All other cells	ND1_7.Neftel_2019_10x Lymphocytes	0.276095	0.704348	0.1	1000
TPM4	tropomyosin 4 [Source:HGNC Symbol;Acc:HGNC:12013]	8.03545e-07	-0.605796	0.197	0.339	0.0153308	Naive T	All other cells	ND1_7.Neftel_2019_10x Lymphocytes	0.73178	1.42441	0.1	1000
CALCOCO2	calcium binding and coiled-coil domain 2 [Source:HGNC Symbol;Acc:HGNC:29912]	8.15943e-07	-0.700785	0.093	0.218	0.0155674	Naive T	All other cells	ND1_7.Neftel_2019_10x Lymphocytes	0.326405	0.759349	0.1	1000
PMF1	polyamine modulated factor 1 [Source:HGNC Symbol;Acc:HGNC:9112]	8.18441e-07	-0.681648	0.104	0.223	0.015615	Naive T	All other cells	ND1_7.Neftel_2019_10x Lymphocytes	0.350265	0.790233	0.1	1000
C11orf58	chromosome 11 open reading frame 58 [Source:HGNC Symbol;Acc:HGNC:16990]	8.38376e-07	-0.415965	0.343	0.518	0.0159954	Naive T	All other cells	ND1_7.Neftel_2019_10x Lymphocytes	1.45136	2.2516	0.1	1000
RABAC1	Rab acceptor 1 [Source:HGNC Symbol;Acc:HGNC:9794]	8.44769e-07	-0.365799	0.418	0.554	0.0161174	Naive T	All other cells	ND1_7.Neftel_2019_10x Lymphocytes	1.80126	2.64097	0.1	1000
PYCARD	PYD and CARD domain containing [Source:HGNC Symbol;Acc:HGNC:16608]	8.67667e-07	-0.531031	0.227	0.376	0.0165542	Naive T	All other cells	ND1_7.Neftel_2019_10x Lymphocytes	0.826655	1.47595	0.1	1000
POLR2K	RNA polymerase II, I and III subunit K [Source:HGNC Symbol;Acc:HGNC:9198]	8.77272e-07	-0.472762	0.221	0.36	0.0167375	Naive T	All other cells	ND1_7.Neftel_2019_10x Lymphocytes	0.797319	1.33968	0.1	1000
EFHD2	EF-hand domain family member D2 [Source:HGNC Symbol;Acc:HGNC:28670]	8.80136e-07	-0.778891	0.069	0.183	0.0167921	Naive T	All other cells	ND1_7.Neftel_2019_10x Lymphocytes	0.226344	0.611122	0.1	1000
SLC9A3R1	SLC9A3 regulator 1 [Source:HGNC Symbol;Acc:HGNC:11075]	8.81537e-07	-0.665258	0.152	0.289	0.0168188	Naive T	All other cells	ND1_7.Neftel_2019_10x Lymphocytes	0.520225	1.10633	0.1	1000
DYNLRB1	dynein light chain roadblock-type 1 [Source:HGNC Symbol;Acc:HGNC:15468]	9.47699e-07	-0.374092	0.34	0.491	0.0180811	Naive T	All other cells	ND1_7.Neftel_2019_10x Lymphocytes	1.36554	2.03041	0.1	1000
PSMD4	proteasome 26S subunit, non-ATPase 4 [Source:HGNC Symbol;Acc:HGNC:9561]	1.01773e-06	-0.519112	0.206	0.341	0.0194173	Naive T	All other cells	ND1_7.Neftel_2019_10x Lymphocytes	0.677993	1.20745	0.1	1000
PSMC2	proteasome 26S subunit, ATPase 2 [Source:HGNC Symbol;Acc:HGNC:9548]	1.0265e-06	-0.552477	0.099	0.211	0.0195846	Naive T	All other cells	ND1_7.Neftel_2019_10x Lymphocytes	0.362865	0.704251	0.1	1000
PSMD7	proteasome 26S subunit, non-ATPase 7 [Source:HGNC Symbol;Acc:HGNC:9565]	1.04009e-06	-0.535022	0.152	0.293	0.0198438	Naive T	All other cells	ND1_7.Neftel_2019_10x Lymphocytes	0.545121	1.00153	0.1	1000
BZW1	basic leucine zipper and W2 domains 1 [Source:HGNC Symbol;Acc:HGNC:18380]	1.04462e-06	-0.471501	0.224	0.392	0.0199303	Naive T	All other cells	ND1_7.Neftel_2019_10x Lymphocytes	0.891714	1.48912	0.1	1000
APMAP	adipocyte plasma membrane associated protein [Source:HGNC Symbol;Acc:HGNC:13238]	1.07697e-06	-0.652889	0.096	0.213	0.0205476	Naive T	All other cells	ND1_7.Neftel_2019_10x Lymphocytes	0.3694	0.801756	0.1	1000
CISD3	CDGSH iron sulfur domain 3 [Source:HGNC Symbol;Acc:HGNC:27578]	1.15963e-06	-0.656196	0.113	0.243	0.0221245	Naive T	All other cells	ND1_7.Neftel_2019_10x Lymphocytes	0.38614	0.837009	0.1	1000
ITGAE	integrin subunit alpha E [Source:HGNC Symbol;Acc:HGNC:6147]	1.17357e-06	-0.599753	0.104	0.219	0.0223905	Naive T	All other cells	ND1_7.Neftel_2019_10x Lymphocytes	0.354318	0.727618	0.1	1000
MRPS15	mitochondrial ribosomal protein S15 [Source:HGNC Symbol;Acc:HGNC:14504]	1.18137e-06	-0.479486	0.137	0.262	0.0225393	Naive T	All other cells	ND1_7.Neftel_2019_10x Lymphocytes	0.502368	0.872971	0.1	1000
TWF2	twinfilin actin binding protein 2 [Source:HGNC Symbol;Acc:HGNC:9621]	1.20753e-06	-0.399874	0.182	0.298	0.0230385	Naive T	All other cells	ND1_7.Neftel_2019_10x Lymphocytes	0.674855	1.0558	0.1	1000
COX5B	cytochrome c oxidase subunit 5B [Source:HGNC Symbol;Acc:HGNC:2269]	1.22673e-06	-0.381129	0.54	0.688	0.0234048	Naive T	All other cells	ND1_7.Neftel_2019_10x Lymphocytes	2.60656	3.86223	0.1	1000
BAX	BCL2 associated X, apoptosis regulator [Source:HGNC Symbol;Acc:HGNC:959]	1.30227e-06	-0.569647	0.328	0.475	0.024846	Naive T	All other cells	ND1_7.Neftel_2019_10x Lymphocytes	1.35093	2.46472	0.1	1000
CCDC12	coiled-coil domain containing 12 [Source:HGNC Symbol;Acc:HGNC:28332]	1.33171e-06	-0.470462	0.173	0.308	0.0254076	Naive T	All other cells	ND1_7.Neftel_2019_10x Lymphocytes	0.65717	1.11203	0.1	1000
SRSF9	serine and arginine rich splicing factor 9 [Source:HGNC Symbol;Acc:HGNC:10791]	1.35802e-06	-0.587141	0.155	0.309	0.0259097	Naive T	All other cells	ND1_7.Neftel_2019_10x Lymphocytes	0.563953	1.09434	0.1	1000
POLR2E	RNA polymerase II, I and III subunit E [Source:HGNC Symbol;Acc:HGNC:9192]	1.3673e-06	-0.457378	0.182	0.303	0.0260868	Naive T	All other cells	ND1_7.Neftel_2019_10x Lymphocytes	0.640974	1.07068	0.1	1000
TMEM50A	transmembrane protein 50A [Source:HGNC Symbol;Acc:HGNC:30590]	1.38677e-06	-0.420613	0.358	0.512	0.0264583	Naive T	All other cells	ND1_7.Neftel_2019_10x Lymphocytes	1.46641	2.28548	0.1	1000
ACTR2	actin related protein 2 [Source:HGNC Symbol;Acc:HGNC:169]	1.40372e-06	-0.423251	0.203	0.338	0.0267817	Naive T	All other cells	ND1_7.Neftel_2019_10x Lymphocytes	0.794712	1.26615	0.1	1000
TPR	translocated promoter region, nuclear basket protein [Source:HGNC Symbol;Acc:HGNC:12017]	1.42786e-06	-0.494916	0.206	0.343	0.0272422	Naive T	All other cells	ND1_7.Neftel_2019_10x Lymphocytes	0.749259	1.29309	0.1	1000
UBE2A	ubiquitin conjugating enzyme E2 A [Source:HGNC Symbol;Acc:HGNC:12472]	1.43704e-06	-0.456668	0.119	0.241	0.0274172	Naive T	All other cells	ND1_7.Neftel_2019_10x Lymphocytes	0.493845	0.837565	0.1	1000
COX20	cytochrome c oxidase assembly factor COX20 [Source:HGNC Symbol;Acc:HGNC:26970]	1.51006e-06	-0.742441	0.104	0.23	0.0288104	Naive T	All other cells	ND1_7.Neftel_2019_10x Lymphocytes	0.325678	0.794373	0.1	1000
MT1F	metallothionein 1F [Source:HGNC Symbol;Acc:HGNC:7398]	1.58738e-06	-0.427253	0.084	0.193	0.0302856	Naive T	All other cells	ND1_7.Neftel_2019_10x Lymphocytes	0.431825	0.71531	0.1	1000
COPS3	COP9 signalosome subunit 3 [Source:HGNC Symbol;Acc:HGNC:2239]	1.61886e-06	-0.798873	0.072	0.181	0.0308863	Naive T	All other cells	ND1_7.Neftel_2019_10x Lymphocytes	0.209686	0.588442	0.1	1000
RNF7	ring finger protein 7 [Source:HGNC Symbol;Acc:HGNC:10070]	1.62405e-06	-0.523277	0.221	0.37	0.0309853	Naive T	All other cells	ND1_7.Neftel_2019_10x Lymphocytes	0.787072	1.39698	0.1	1000
PSMD14	proteasome 26S subunit, non-ATPase 14 [Source:HGNC Symbol;Acc:HGNC:16889]	1.66328e-06	-0.650252	0.075	0.19	0.0317338	Naive T	All other cells	ND1_7.Neftel_2019_10x Lymphocytes	0.259494	0.588798	0.1	1000
CFAP36	cilia and flagella associated protein 36 [Source:HGNC Symbol;Acc:HGNC:30540]	1.66492e-06	0.667787	0.143	0.06	0.0317651	Naive T	All other cells	ND1_7.Neftel_2019_10x Lymphocytes	0.462027	0.188231	0.1	1000
MX1	MX dynamin like GTPase 1 [Source:HGNC Symbol;Acc:HGNC:7532]	1.66767e-06	-0.971912	0.113	0.23	0.0318175	Naive T	All other cells	ND1_7.Neftel_2019_10x Lymphocytes	0.507293	1.50507	0.1	1000
CCDC107	coiled-coil domain containing 107 [Source:HGNC Symbol;Acc:HGNC:28465]	1.7299e-06	-0.491472	0.197	0.351	0.0330048	Naive T	All other cells	ND1_7.Neftel_2019_10x Lymphocytes	0.792538	1.35905	0.1	1000
VPS26A	VPS26, retromer complex component A [Source:HGNC Symbol;Acc:HGNC:12711]	1.74489e-06	-0.597452	0.06	0.156	0.0332907	Naive T	All other cells	ND1_7.Neftel_2019_10x Lymphocytes	0.223142	0.487305	0.1	1000
CD53	CD53 molecule [Source:HGNC Symbol;Acc:HGNC:1686]	1.76312e-06	-0.294707	0.576	0.695	0.0336386	Naive T	All other cells	ND1_7.Neftel_2019_10x Lymphocytes	2.99522	4.05605	0.1	1000
ARF5	ADP ribosylation factor 5 [Source:HGNC Symbol;Acc:HGNC:658]	1.79004e-06	-0.458491	0.236	0.382	0.0341522	Naive T	All other cells	ND1_7.Neftel_2019_10x Lymphocytes	0.9448	1.55254	0.1	1000
C6orf48		1.82673e-06	0.404692	0.499	0.383	0.0348522	Naive T	All other cells	ND1_7.Neftel_2019_10x Lymphocytes	2.44482	1.59786	0.1	1000
SERINC5	serine incorporator 5 [Source:HGNC Symbol;Acc:HGNC:18825]	1.86126e-06	0.694753	0.122	0.049	0.035511	Naive T	All other cells	ND1_7.Neftel_2019_10x Lymphocytes	0.417633	0.158401	0.1	1000
TNFSF14	TNF superfamily member 14 [Source:HGNC Symbol;Acc:HGNC:11930]	1.90467e-06	-0.903245	0.033	0.124	0.0363392	Naive T	All other cells	ND1_7.Neftel_2019_10x Lymphocytes	0.123148	0.45064	0.1	1000
VASP	vasodilator stimulated phosphoprotein [Source:HGNC Symbol;Acc:HGNC:12652]	1.93624e-06	-0.458813	0.164	0.287	0.0369415	Naive T	All other cells	ND1_7.Neftel_2019_10x Lymphocytes	0.636772	1.06572	0.1	1000
PARP9	poly(ADP-ribose) polymerase family member 9 [Source:HGNC Symbol;Acc:HGNC:24118]	1.95279e-06	-0.784936	0.054	0.15	0.0372573	Naive T	All other cells	ND1_7.Neftel_2019_10x Lymphocytes	0.196746	0.550546	0.1	1000
MAD2L2	mitotic arrest deficient 2 like 2 [Source:HGNC Symbol;Acc:HGNC:6764]	2.0057e-06	-0.76721	0.066	0.185	0.0382668	Naive T	All other cells	ND1_7.Neftel_2019_10x Lymphocytes	0.219048	0.587149	0.1	1000
SRI	sorcin [Source:HGNC Symbol;Acc:HGNC:11292]	2.07153e-06	-0.488606	0.313	0.447	0.0395227	Naive T	All other cells	ND1_7.Neftel_2019_10x Lymphocytes	1.13548	1.91388	0.1	1000
SNRPB2	small nuclear ribonucleoprotein polypeptide B2 [Source:HGNC Symbol;Acc:HGNC:11155]	2.08778e-06	-0.385034	0.272	0.415	0.0398327	Naive T	All other cells	ND1_7.Neftel_2019_10x Lymphocytes	1.10186	1.66633	0.1	1000
LITAF	lipopolysaccharide induced TNF factor [Source:HGNC Symbol;Acc:HGNC:16841]	2.11714e-06	-0.464435	0.284	0.417	0.040393	Naive T	All other cells	ND1_7.Neftel_2019_10x Lymphocytes	1.24671	2.04277	0.1	1000
PAFAH1B1	platelet activating factor acetylhydrolase 1b regulatory subunit 1 [Source:HGNC Symbol;Acc:HGNC:8574]	2.15397e-06	-0.595847	0.104	0.223	0.0410956	Naive T	All other cells	ND1_7.Neftel_2019_10x Lymphocytes	0.383251	0.776891	0.1	1000
PAIP2	poly(A) binding protein interacting protein 2 [Source:HGNC Symbol;Acc:HGNC:17970]	2.17194e-06	-0.370775	0.29	0.453	0.0414385	Naive T	All other cells	ND1_7.Neftel_2019_10x Lymphocytes	1.26405	1.87631	0.1	1000
CLDND1	claudin domain containing 1 [Source:HGNC Symbol;Acc:HGNC:1322]	2.24409e-06	-0.636609	0.164	0.299	0.042815	Naive T	All other cells	ND1_7.Neftel_2019_10x Lymphocytes	0.657764	1.33222	0.1	1000
BUB3	BUB3 mitotic checkpoint protein [Source:HGNC Symbol;Acc:HGNC:1151]	2.26397e-06	-0.437794	0.275	0.419	0.0431943	Naive T	All other cells	ND1_7.Neftel_2019_10x Lymphocytes	1.1086	1.77246	0.1	1000
HMOX2	heme oxygenase 2 [Source:HGNC Symbol;Acc:HGNC:5014]	2.27487e-06	-0.524696	0.197	0.325	0.0434022	Naive T	All other cells	ND1_7.Neftel_2019_10x Lymphocytes	0.675603	1.21073	0.1	1000
APOL6	apolipoprotein L6 [Source:HGNC Symbol;Acc:HGNC:14870]	2.30906e-06	-0.566571	0.075	0.17	0.0440545	Naive T	All other cells	ND1_7.Neftel_2019_10x Lymphocytes	0.28989	0.58707	0.1	1000
MRPL54	mitochondrial ribosomal protein L54 [Source:HGNC Symbol;Acc:HGNC:16685]	2.32797e-06	-0.411324	0.209	0.37	0.0444154	Naive T	All other cells	ND1_7.Neftel_2019_10x Lymphocytes	0.870146	1.36377	0.1	1000
NAPA	NSF attachment protein alpha [Source:HGNC Symbol;Acc:HGNC:7641]	2.37441e-06	-0.612582	0.116	0.232	0.0453013	Naive T	All other cells	ND1_7.Neftel_2019_10x Lymphocytes	0.390953	0.805901	0.1	1000
SSNA1	SS nuclear autoantigen 1 [Source:HGNC Symbol;Acc:HGNC:11321]	2.46755e-06	-0.422473	0.224	0.34	0.0470783	Naive T	All other cells	ND1_7.Neftel_2019_10x Lymphocytes	0.787229	1.25367	0.1	1000
GSDMD	gasdermin D [Source:HGNC Symbol;Acc:HGNC:25697]	2.56326e-06	-0.566552	0.176	0.303	0.0489045	Naive T	All other cells	ND1_7.Neftel_2019_10x Lymphocytes	0.591815	1.1191	0.1	1000
PUF60	poly(U) binding splicing factor 60 [Source:HGNC Symbol;Acc:HGNC:17042]	2.61007e-06	-0.587544	0.152	0.279	0.0497975	Naive T	All other cells	ND1_7.Neftel_2019_10x Lymphocytes	0.500799	0.981176	0.1	1000
SDF2L1	stromal cell derived factor 2 like 1 [Source:HGNC Symbol;Acc:HGNC:10676]	2.61569e-06	-0.621681	0.155	0.28	0.0499048	Naive T	All other cells	ND1_7.Neftel_2019_10x Lymphocytes	0.506376	1.02911	0.1	1000
S100A11	S100 calcium binding protein A11 [Source:HGNC Symbol;Acc:HGNC:10488]	2.61804e-06	-0.300916	0.693	0.787	0.0499496	Naive T	All other cells	ND1_7.Neftel_2019_10x Lymphocytes	5.20561	7.0684	0.1	1000
TBC1D10C	TBC1 domain family member 10C [Source:HGNC Symbol;Acc:HGNC:24702]	2.69724e-06	-0.388254	0.361	0.496	0.0514606	Naive T	All other cells	ND1_7.Neftel_2019_10x Lymphocytes	1.49224	2.24761	0.1	1000
C11orf73		2.71316e-06	-0.475691	0.107	0.212	0.0517643	Naive T	All other cells	ND1_7.Neftel_2019_10x Lymphocytes	0.390072	0.688588	0.1	1000
SEC61G	SEC61 translocon subunit gamma [Source:HGNC Symbol;Acc:HGNC:18277]	2.78536e-06	-0.311134	0.451	0.581	0.053142	Naive T	All other cells	ND1_7.Neftel_2019_10x Lymphocytes	1.9809	2.74037	0.1	1000
RBM39	RNA binding motif protein 39 [Source:HGNC Symbol;Acc:HGNC:15923]	2.97466e-06	-0.404398	0.391	0.51	0.0567535	Naive T	All other cells	ND1_7.Neftel_2019_10x Lymphocytes	1.52863	2.34034	0.1	1000
LGALS1	galectin 1 [Source:HGNC Symbol;Acc:HGNC:6561]	3.19324e-06	-0.608306	0.516	0.617	0.0609239	Naive T	All other cells	ND1_7.Neftel_2019_10x Lymphocytes	3.60112	6.70013	0.1	1000
MAD1L1	mitotic arrest deficient 1 like 1 [Source:HGNC Symbol;Acc:HGNC:6762]	3.20941e-06	-0.497566	0.084	0.173	0.0612324	Naive T	All other cells	ND1_7.Neftel_2019_10x Lymphocytes	0.302726	0.562368	0.1	1000
SMIM12	small integral membrane protein 12 [Source:HGNC Symbol;Acc:HGNC:25154]	3.22238e-06	-0.464752	0.096	0.195	0.0614798	Naive T	All other cells	ND1_7.Neftel_2019_10x Lymphocytes	0.356316	0.626282	0.1	1000
TXN	thioredoxin [Source:HGNC Symbol;Acc:HGNC:12435]	3.22881e-06	-0.328722	0.454	0.59	0.0616025	Naive T	All other cells	ND1_7.Neftel_2019_10x Lymphocytes	2.0941	2.94803	0.1	1000
ILK	integrin linked kinase [Source:HGNC Symbol;Acc:HGNC:6040]	3.25807e-06	-0.475179	0.096	0.2	0.0621608	Naive T	All other cells	ND1_7.Neftel_2019_10x Lymphocytes	0.382457	0.675937	0.1	1000
CD3G	CD3g molecule [Source:HGNC Symbol;Acc:HGNC:1675]	3.303e-06	-0.359323	0.439	0.563	0.0630179	Naive T	All other cells	ND1_7.Neftel_2019_10x Lymphocytes	2.11023	3.06585	0.1	1000
CAPZA1	capping actin protein of muscle Z-line subunit alpha 1 [Source:HGNC Symbol;Acc:HGNC:1488]	3.37585e-06	-0.470044	0.245	0.392	0.0644079	Naive T	All other cells	ND1_7.Neftel_2019_10x Lymphocytes	0.982343	1.63182	0.1	1000
RHOF	ras homolog family member F, filopodia associated [Source:HGNC Symbol;Acc:HGNC:15703]	3.44349e-06	-0.483367	0.212	0.355	0.0656983	Naive T	All other cells	ND1_7.Neftel_2019_10x Lymphocytes	0.787973	1.33987	0.1	1000
USB1	U6 snRNA biogenesis phosphodiesterase 1 [Source:HGNC Symbol;Acc:HGNC:25792]	3.5313e-06	-0.680918	0.027	0.105	0.0673736	Naive T	All other cells	ND1_7.Neftel_2019_10x Lymphocytes	0.104005	0.303051	0.1	1000
C9orf142		3.75489e-06	-0.331804	0.382	0.515	0.0716395	Naive T	All other cells	ND1_7.Neftel_2019_10x Lymphocytes	1.70588	2.41646	0.1	1000
XRCC5	X-ray repair cross complementing 5 [Source:HGNC Symbol;Acc:HGNC:12833]	3.82336e-06	-0.335451	0.272	0.418	0.0729458	Naive T	All other cells	ND1_7.Neftel_2019_10x Lymphocytes	1.16332	1.66684	0.1	1000
MPG	N-methylpurine DNA glycosylase [Source:HGNC Symbol;Acc:HGNC:7211]	3.95903e-06	-0.567983	0.134	0.261	0.0755343	Naive T	All other cells	ND1_7.Neftel_2019_10x Lymphocytes	0.473067	0.911294	0.1	1000
SAT1	spermidine/spermine N1-acetyltransferase 1 [Source:HGNC Symbol;Acc:HGNC:10540]	3.97853e-06	-0.387399	0.573	0.672	0.0759064	Naive T	All other cells	ND1_7.Neftel_2019_10x Lymphocytes	3.74064	5.55781	0.1	1000
TLN1	talin 1 [Source:HGNC Symbol;Acc:HGNC:11845]	3.98786e-06	-0.711157	0.143	0.3	0.0760844	Naive T	All other cells	ND1_7.Neftel_2019_10x Lymphocytes	0.483614	1.08844	0.1	1000
DEF6	DEF6 guanine nucleotide exchange factor [Source:HGNC Symbol;Acc:HGNC:2760]	4.02118e-06	-0.524328	0.191	0.31	0.0767201	Naive T	All other cells	ND1_7.Neftel_2019_10x Lymphocytes	0.655941	1.17703	0.1	1000
RNASEH2C	ribonuclease H2 subunit C [Source:HGNC Symbol;Acc:HGNC:24116]	4.13002e-06	-0.538993	0.134	0.256	0.0787966	Naive T	All other cells	ND1_7.Neftel_2019_10x Lymphocytes	0.485881	0.904363	0.1	1000
ACAA2	acetyl-CoA acyltransferase 2 [Source:HGNC Symbol;Acc:HGNC:83]	4.16623e-06	-0.71152	0.093	0.21	0.0794875	Naive T	All other cells	ND1_7.Neftel_2019_10x Lymphocytes	0.293031	0.700638	0.1	1000
AOAH	acyloxyacyl hydrolase [Source:HGNC Symbol;Acc:HGNC:548]	4.27519e-06	-0.8757	0.036	0.125	0.0815664	Naive T	All other cells	ND1_7.Neftel_2019_10x Lymphocytes	0.136905	0.468703	0.1	1000
THRAP3	thyroid hormone receptor associated protein 3 [Source:HGNC Symbol;Acc:HGNC:22964]	4.4541e-06	-0.541305	0.233	0.355	0.0849797	Naive T	All other cells	ND1_7.Neftel_2019_10x Lymphocytes	0.776718	1.40642	0.1	1000
PSTPIP1	proline-serine-threonine phosphatase interacting protein 1 [Source:HGNC Symbol;Acc:HGNC:9580]	4.52112e-06	-0.605859	0.119	0.237	0.0862584	Naive T	All other cells	ND1_7.Neftel_2019_10x Lymphocytes	0.403052	0.822006	0.1	1000
ERH	ERH mRNA splicing and mitosis factor [Source:HGNC Symbol;Acc:HGNC:3447]	4.56921e-06	-0.344834	0.349	0.485	0.087176	Naive T	All other cells	ND1_7.Neftel_2019_10x Lymphocytes	1.45189	2.09089	0.1	1000
OAS2	2'-5'-oligoadenylate synthetase 2 [Source:HGNC Symbol;Acc:HGNC:8087]	4.62492e-06	-0.955969	0.024	0.107	0.0882389	Naive T	All other cells	ND1_7.Neftel_2019_10x Lymphocytes	0.0799534	0.368093	0.1	1000
FAM65B		4.97126e-06	0.591441	0.254	0.137	0.0948468	Naive T	All other cells	ND1_7.Neftel_2019_10x Lymphocytes	0.939357	0.475314	0.1	1000
MYH9	myosin heavy chain 9 [Source:HGNC Symbol;Acc:HGNC:7579]	5.07925e-06	-0.428998	0.281	0.424	0.0969071	Naive T	All other cells	ND1_7.Neftel_2019_10x Lymphocytes	1.19675	1.89144	0.1	1000
CD164	CD164 molecule [Source:HGNC Symbol;Acc:HGNC:1632]	5.08546e-06	-0.539785	0.266	0.395	0.0970255	Naive T	All other cells	ND1_7.Neftel_2019_10x Lymphocytes	0.912778	1.63756	0.1	1000
CASP4	caspase 4 [Source:HGNC Symbol;Acc:HGNC:1505]	5.16756e-06	-0.444462	0.26	0.404	0.0985919	Naive T	All other cells	ND1_7.Neftel_2019_10x Lymphocytes	1.0007	1.61672	0.1	1000
COPZ1	COPI coat complex subunit zeta 1 [Source:HGNC Symbol;Acc:HGNC:2243]	5.31774e-06	-0.539496	0.146	0.274	0.101457	Naive T	All other cells	ND1_7.Neftel_2019_10x Lymphocytes	0.507936	0.942697	0.1	1000
LCP2	lymphocyte cytosolic protein 2 [Source:HGNC Symbol;Acc:HGNC:6529]	5.38708e-06	-0.360713	0.203	0.35	0.10278	Naive T	All other cells	ND1_7.Neftel_2019_10x Lymphocytes	0.970293	1.43518	0.1	1000
NEDD8	NEDD8 ubiquitin like modifier [Source:HGNC Symbol;Acc:HGNC:7732]	5.397e-06	-0.352818	0.513	0.609	0.102969	Naive T	All other cells	ND1_7.Neftel_2019_10x Lymphocytes	2.23308	3.22015	0.1	1000
PMVK	phosphomevalonate kinase [Source:HGNC Symbol;Acc:HGNC:9141]	5.65291e-06	-0.547523	0.131	0.236	0.107852	Naive T	All other cells	ND1_7.Neftel_2019_10x Lymphocytes	0.403674	0.770835	0.1	1000
UBE2D3	ubiquitin conjugating enzyme E2 D3 [Source:HGNC Symbol;Acc:HGNC:12476]	5.7651e-06	-0.308562	0.552	0.681	0.109992	Naive T	All other cells	ND1_7.Neftel_2019_10x Lymphocytes	2.66401	3.6631	0.1	1000
BUD31	BUD31 homolog [Source:HGNC Symbol;Acc:HGNC:29629]	5.85184e-06	-0.543027	0.194	0.338	0.111647	Naive T	All other cells	ND1_7.Neftel_2019_10x Lymphocytes	0.675249	1.23437	0.1	1000
CBLB	Cbl proto-oncogene B [Source:HGNC Symbol;Acc:HGNC:1542]	5.91436e-06	-0.622399	0.104	0.218	0.11284	Naive T	All other cells	ND1_7.Neftel_2019_10x Lymphocytes	0.483971	0.988169	0.1	1000
AQP3	aquaporin 3 (Gill blood group) [Source:HGNC Symbol;Acc:HGNC:636]	6.12465e-06	0.389213	0.301	0.186	0.116852	Naive T	All other cells	ND1_7.Neftel_2019_10x Lymphocytes	1.07815	0.698306	0.1	1000
PKM	pyruvate kinase M1/2 [Source:HGNC Symbol;Acc:HGNC:9021]	6.20382e-06	-0.37435	0.427	0.547	0.118363	Naive T	All other cells	ND1_7.Neftel_2019_10x Lymphocytes	1.96431	2.9016	0.1	1000
SHISA5	shisa family member 5 [Source:HGNC Symbol;Acc:HGNC:30376]	6.34348e-06	-0.462683	0.206	0.332	0.121027	Naive T	All other cells	ND1_7.Neftel_2019_10x Lymphocytes	0.806789	1.34028	0.1	1000
SMC3	structural maintenance of chromosomes 3 [Source:HGNC Symbol;Acc:HGNC:2468]	6.41489e-06	-0.553794	0.128	0.247	0.12239	Naive T	All other cells	ND1_7.Neftel_2019_10x Lymphocytes	0.437953	0.835953	0.1	1000
ADRM1	adhesion regulating molecule 1 [Source:HGNC Symbol;Acc:HGNC:15759]	6.47925e-06	-0.518236	0.182	0.311	0.123618	Naive T	All other cells	ND1_7.Neftel_2019_10x Lymphocytes	0.604861	1.08351	0.1	1000
MRPL1	mitochondrial ribosomal protein L1 [Source:HGNC Symbol;Acc:HGNC:14275]	6.52809e-06	-0.71274	0.045	0.127	0.124549	Naive T	All other cells	ND1_7.Neftel_2019_10x Lymphocytes	0.152195	0.41437	0.1	1000
ISOC2	isochorismatase domain containing 2 [Source:HGNC Symbol;Acc:HGNC:26278]	6.60317e-06	-0.778497	0.033	0.111	0.125982	Naive T	All other cells	ND1_7.Neftel_2019_10x Lymphocytes	0.0996137	0.334798	0.1	1000
CD58	CD58 molecule [Source:HGNC Symbol;Acc:HGNC:1688]	6.65143e-06	-0.617442	0.099	0.221	0.126903	Naive T	All other cells	ND1_7.Neftel_2019_10x Lymphocytes	0.342107	0.719746	0.1	1000
RASGRP2	RAS guanyl releasing protein 2 [Source:HGNC Symbol;Acc:HGNC:9879]	6.97507e-06	0.552176	0.188	0.109	0.133077	Naive T	All other cells	ND1_7.Neftel_2019_10x Lymphocytes	0.711531	0.367195	0.1	1000
CAPG	capping actin protein, gelsolin like [Source:HGNC Symbol;Acc:HGNC:1474]	7.08129e-06	-0.526433	0.328	0.457	0.135104	Naive T	All other cells	ND1_7.Neftel_2019_10x Lymphocytes	1.44504	2.51557	0.1	1000
ATP1B3	ATPase Na+/K+ transporting subunit beta 3 [Source:HGNC Symbol;Acc:HGNC:806]	7.10971e-06	-0.566548	0.143	0.286	0.135646	Naive T	All other cells	ND1_7.Neftel_2019_10x Lymphocytes	0.561216	1.06518	0.1	1000
ZFAS1	ZNFX1 antisense RNA 1 [Source:HGNC Symbol;Acc:HGNC:33101]	7.17111e-06	0.262604	0.681	0.56	0.136818	Naive T	All other cells	ND1_7.Neftel_2019_10x Lymphocytes	3.8499	2.93766	0.1	1000
IFITM1	interferon induced transmembrane protein 1 [Source:HGNC Symbol;Acc:HGNC:5412]	7.18006e-06	-0.35738	0.457	0.587	0.136988	Naive T	All other cells	ND1_7.Neftel_2019_10x Lymphocytes	4.78357	6.88144	0.1	1000
CASP3	caspase 3 [Source:HGNC Symbol;Acc:HGNC:1504]	7.45831e-06	-0.935833	0.027	0.104	0.142297	Naive T	All other cells	ND1_7.Neftel_2019_10x Lymphocytes	0.073654	0.342702	0.1	1000
DNAJB11	DnaJ heat shock protein family (Hsp40) member B11 [Source:HGNC Symbol;Acc:HGNC:14889]	7.52121e-06	-0.612795	0.078	0.18	0.143497	Naive T	All other cells	ND1_7.Neftel_2019_10x Lymphocytes	0.26676	0.576887	0.1	1000
ACP5	acid phosphatase 5, tartrate resistant [Source:HGNC Symbol;Acc:HGNC:124]	7.52384e-06	-0.651613	0.075	0.174	0.143547	Naive T	All other cells	ND1_7.Neftel_2019_10x Lymphocytes	0.264634	0.599599	0.1	1000
NDUFB2	NADH:ubiquinone oxidoreductase subunit B2 [Source:HGNC Symbol;Acc:HGNC:7697]	7.60676e-06	-0.308949	0.501	0.624	0.145129	Naive T	All other cells	ND1_7.Neftel_2019_10x Lymphocytes	2.35792	3.24767	0.1	1000
ATPIF1		8.04378e-06	-0.360562	0.46	0.598	0.153467	Naive T	All other cells	ND1_7.Neftel_2019_10x Lymphocytes	2.02333	2.94514	0.1	1000
IRF7	interferon regulatory factor 7 [Source:HGNC Symbol;Acc:HGNC:6122]	8.10622e-06	-0.473181	0.101	0.195	0.154659	Naive T	All other cells	ND1_7.Neftel_2019_10x Lymphocytes	0.50532	0.871595	0.1	1000
RBM3	RNA binding motif protein 3 [Source:HGNC Symbol;Acc:HGNC:9900]	8.16247e-06	-0.254044	0.57	0.671	0.155732	Naive T	All other cells	ND1_7.Neftel_2019_10x Lymphocytes	2.92322	3.79762	0.1	1000
DAZAP2	DAZ associated protein 2 [Source:HGNC Symbol;Acc:HGNC:2684]	8.43248e-06	-0.385436	0.403	0.558	0.160883	Naive T	All other cells	ND1_7.Neftel_2019_10x Lymphocytes	2.11987	3.16377	0.1	1000
MAPK1IP1L	mitogen-activated protein kinase 1 interacting protein 1 like [Source:HGNC Symbol;Acc:HGNC:19840]	8.49382e-06	-0.67639	0.11	0.23	0.162054	Naive T	All other cells	ND1_7.Neftel_2019_10x Lymphocytes	0.366746	0.81798	0.1	1000
PRDX1	peroxiredoxin 1 [Source:HGNC Symbol;Acc:HGNC:9352]	8.72219e-06	-0.397518	0.457	0.573	0.166411	Naive T	All other cells	ND1_7.Neftel_2019_10x Lymphocytes	1.85938	2.8158	0.1	1000
DNAJC8	DnaJ heat shock protein family (Hsp40) member C8 [Source:HGNC Symbol;Acc:HGNC:15470]	8.75195e-06	-0.395339	0.233	0.36	0.166978	Naive T	All other cells	ND1_7.Neftel_2019_10x Lymphocytes	0.907006	1.39529	0.1	1000
DDAH2	dimethylarginine dimethylaminohydrolase 2 [Source:HGNC Symbol;Acc:HGNC:2716]	8.77019e-06	-0.674758	0.066	0.166	0.167327	Naive T	All other cells	ND1_7.Neftel_2019_10x Lymphocytes	0.246255	0.579892	0.1	1000
PSMB1	proteasome 20S subunit beta 1 [Source:HGNC Symbol;Acc:HGNC:9537]	8.93277e-06	-0.359238	0.445	0.574	0.170428	Naive T	All other cells	ND1_7.Neftel_2019_10x Lymphocytes	1.81811	2.64718	0.1	1000
CHCHD7	coiled-coil-helix-coiled-coil-helix domain containing 7 [Source:HGNC Symbol;Acc:HGNC:28314]	8.96172e-06	-0.579758	0.087	0.192	0.170981	Naive T	All other cells	ND1_7.Neftel_2019_10x Lymphocytes	0.308242	0.628959	0.1	1000
SLTM	SAFB like transcription modulator [Source:HGNC Symbol;Acc:HGNC:20709]	8.97257e-06	-0.618633	0.143	0.28	0.171188	Naive T	All other cells	ND1_7.Neftel_2019_10x Lymphocytes	0.491804	0.998617	0.1	1000
PRDX5	peroxiredoxin 5 [Source:HGNC Symbol;Acc:HGNC:9355]	9.24806e-06	-0.431069	0.322	0.45	0.176444	Naive T	All other cells	ND1_7.Neftel_2019_10x Lymphocytes	1.2186	1.9292	0.1	1000
ATG12	autophagy related 12 [Source:HGNC Symbol;Acc:HGNC:588]	9.34876e-06	-0.464044	0.104	0.201	0.178365	Naive T	All other cells	ND1_7.Neftel_2019_10x Lymphocytes	0.372307	0.6512	0.1	1000
SPCS1	signal peptidase complex subunit 1 [Source:HGNC Symbol;Acc:HGNC:23401]	9.35622e-06	-0.279657	0.499	0.609	0.178507	Naive T	All other cells	ND1_7.Neftel_2019_10x Lymphocytes	2.2065	2.95076	0.1	1000
SNF8	SNF8 subunit of ESCRT-II [Source:HGNC Symbol;Acc:HGNC:17028]	9.40488e-06	-0.653596	0.096	0.208	0.179436	Naive T	All other cells	ND1_7.Neftel_2019_10x Lymphocytes	0.298642	0.666365	0.1	1000
UBE2N	ubiquitin conjugating enzyme E2 N [Source:HGNC Symbol;Acc:HGNC:12492]	9.44922e-06	-0.400896	0.278	0.405	0.180282	Naive T	All other cells	ND1_7.Neftel_2019_10x Lymphocytes	0.996006	1.53651	0.1	1000
MYEOV2		9.65911e-06	-0.39915	0.331	0.467	0.184286	Naive T	All other cells	ND1_7.Neftel_2019_10x Lymphocytes	1.27523	1.94986	0.1	1000
NAMPT	nicotinamide phosphoribosyltransferase [Source:HGNC Symbol;Acc:HGNC:30092]	9.71327e-06	-0.577847	0.06	0.138	0.185319	Naive T	All other cells	ND1_7.Neftel_2019_10x Lymphocytes	0.210841	0.45398	0.1	1000
MTCH2	mitochondrial carrier 2 [Source:HGNC Symbol;Acc:HGNC:17587]	9.92737e-06	-0.717126	0.066	0.173	0.189404	Naive T	All other cells	ND1_7.Neftel_2019_10x Lymphocytes	0.211253	0.537614	0.1	1000
HSPH1	heat shock protein family H (Hsp110) member 1 [Source:HGNC Symbol;Acc:HGNC:16969]	1.01939e-05	-0.685919	0.099	0.21	0.19449	Naive T	All other cells	ND1_7.Neftel_2019_10x Lymphocytes	0.675211	1.43926	0.1	1000
TSG101	tumor susceptibility 101 [Source:HGNC Symbol;Acc:HGNC:15971]	1.04061e-05	-0.521306	0.072	0.166	0.198537	Naive T	All other cells	ND1_7.Neftel_2019_10x Lymphocytes	0.266468	0.517215	0.1	1000
H2AFZ		1.04757e-05	-0.443744	0.478	0.581	0.199866	Naive T	All other cells	ND1_7.Neftel_2019_10x Lymphocytes	2.1802	3.45377	0.1	1000
RAB8B	RAB8B, member RAS oncogene family [Source:HGNC Symbol;Acc:HGNC:30273]	1.05445e-05	-0.59885	0.063	0.151	0.201179	Naive T	All other cells	ND1_7.Neftel_2019_10x Lymphocytes	0.231679	0.503664	0.1	1000
SPCS3	signal peptidase complex subunit 3 [Source:HGNC Symbol;Acc:HGNC:26212]	1.06687e-05	-0.505604	0.134	0.251	0.203548	Naive T	All other cells	ND1_7.Neftel_2019_10x Lymphocytes	0.493987	0.884822	0.1	1000
ZYX	zyxin [Source:HGNC Symbol;Acc:HGNC:13200]	1.09509e-05	-0.452885	0.176	0.292	0.208933	Naive T	All other cells	ND1_7.Neftel_2019_10x Lymphocytes	0.72612	1.19936	0.1	1000
NDUFA1	NADH:ubiquinone oxidoreductase subunit A1 [Source:HGNC Symbol;Acc:HGNC:7683]	1.11364e-05	-0.336581	0.469	0.591	0.212471	Naive T	All other cells	ND1_7.Neftel_2019_10x Lymphocytes	2.02904	2.88098	0.1	1000
ATP6V0D1	ATPase H+ transporting V0 subunit d1 [Source:HGNC Symbol;Acc:HGNC:13724]	1.12956e-05	-0.66555	0.09	0.195	0.215508	Naive T	All other cells	ND1_7.Neftel_2019_10x Lymphocytes	0.276768	0.633025	0.1	1000
LSM3	LSM3 homolog, U6 small nuclear RNA and mRNA degradation associated [Source:HGNC Symbol;Acc:HGNC:17874]	1.16735e-05	-0.486646	0.224	0.357	0.222718	Naive T	All other cells	ND1_7.Neftel_2019_10x Lymphocytes	0.795688	1.35715	0.1	1000
GBP4	guanylate binding protein 4 [Source:HGNC Symbol;Acc:HGNC:20480]	1.19772e-05	-0.804652	0.051	0.139	0.228513	Naive T	All other cells	ND1_7.Neftel_2019_10x Lymphocytes	0.190232	0.548934	0.1	1000
PA2G4	proliferation-associated 2G4 [Source:HGNC Symbol;Acc:HGNC:8550]	1.2255e-05	-0.379772	0.307	0.44	0.233813	Naive T	All other cells	ND1_7.Neftel_2019_10x Lymphocytes	1.20643	1.80994	0.1	1000
ZNHIT1	zinc finger HIT-type containing 1 [Source:HGNC Symbol;Acc:HGNC:21688]	1.26582e-05	-0.377841	0.26	0.387	0.241505	Naive T	All other cells	ND1_7.Neftel_2019_10x Lymphocytes	0.964341	1.45301	0.1	1000
HSPA5	heat shock protein family A (Hsp70) member 5 [Source:HGNC Symbol;Acc:HGNC:5238]	1.27646e-05	-0.545963	0.245	0.379	0.243537	Naive T	All other cells	ND1_7.Neftel_2019_10x Lymphocytes	0.927302	1.6734	0.1	1000
TIGIT	T cell immunoreceptor with Ig and ITIM domains [Source:HGNC Symbol;Acc:HGNC:26838]	1.32032e-05	-0.931877	0.054	0.156	0.251905	Naive T	All other cells	ND1_7.Neftel_2019_10x Lymphocytes	0.218871	0.709699	0.1	1000
MRPS7	mitochondrial ribosomal protein S7 [Source:HGNC Symbol;Acc:HGNC:14499]	1.36187e-05	-0.579724	0.119	0.241	0.259831	Naive T	All other cells	ND1_7.Neftel_2019_10x Lymphocytes	0.397794	0.788834	0.1	1000
RALY	RALY heterogeneous nuclear ribonucleoprotein [Source:HGNC Symbol;Acc:HGNC:15921]	1.36527e-05	-0.394078	0.272	0.405	0.26048	Naive T	All other cells	ND1_7.Neftel_2019_10x Lymphocytes	1.03886	1.58895	0.1	1000
SRSF7	serine and arginine rich splicing factor 7 [Source:HGNC Symbol;Acc:HGNC:10789]	1.36908e-05	-0.252767	0.501	0.616	0.261207	Naive T	All other cells	ND1_7.Neftel_2019_10x Lymphocytes	2.89319	3.75398	0.1	1000
TRIM22	tripartite motif containing 22 [Source:HGNC Symbol;Acc:HGNC:16379]	1.39819e-05	-0.518157	0.191	0.326	0.26676	Naive T	All other cells	ND1_7.Neftel_2019_10x Lymphocytes	0.799146	1.4096	0.1	1000
ATP5J2		1.40687e-05	-0.334485	0.475	0.593	0.268416	Naive T	All other cells	ND1_7.Neftel_2019_10x Lymphocytes	2.02115	2.86371	0.1	1000
G3BP1	G3BP stress granule assembly factor 1 [Source:HGNC Symbol;Acc:HGNC:30292]	1.43247e-05	-0.583617	0.09	0.184	0.273301	Naive T	All other cells	ND1_7.Neftel_2019_10x Lymphocytes	0.303165	0.622678	0.1	1000
AP3S1	adaptor related protein complex 3 subunit sigma 1 [Source:HGNC Symbol;Acc:HGNC:2013]	1.45984e-05	-0.468919	0.197	0.319	0.278523	Naive T	All other cells	ND1_7.Neftel_2019_10x Lymphocytes	0.773206	1.29561	0.1	1000
SP100	SP100 nuclear antigen [Source:HGNC Symbol;Acc:HGNC:11206]	1.5447e-05	-0.40643	0.322	0.435	0.294713	Naive T	All other cells	ND1_7.Neftel_2019_10x Lymphocytes	1.19639	1.84646	0.1	1000
PPM1M	protein phosphatase, Mg2+/Mn2+ dependent 1M [Source:HGNC Symbol;Acc:HGNC:26506]	1.55046e-05	-0.579089	0.033	0.101	0.295812	Naive T	All other cells	ND1_7.Neftel_2019_10x Lymphocytes	0.136226	0.321525	0.1	1000
PARVG	parvin gamma [Source:HGNC Symbol;Acc:HGNC:14654]	1.56229e-05	-0.453286	0.116	0.22	0.29807	Naive T	All other cells	ND1_7.Neftel_2019_10x Lymphocytes	0.429597	0.733308	0.1	1000
RNF115	ring finger protein 115 [Source:HGNC Symbol;Acc:HGNC:18154]	1.64014e-05	-0.479552	0.087	0.183	0.312923	Naive T	All other cells	ND1_7.Neftel_2019_10x Lymphocytes	0.346368	0.62104	0.1	1000
STARD3NL	STARD3 N-terminal like [Source:HGNC Symbol;Acc:HGNC:19169]	1.65946e-05	-0.727709	0.042	0.128	0.316609	Naive T	All other cells	ND1_7.Neftel_2019_10x Lymphocytes	0.154325	0.426537	0.1	1000
LAMTOR5	late endosomal/lysosomal adaptor, MAPK and MTOR activator 5 [Source:HGNC Symbol;Acc:HGNC:17955]	1.66368e-05	-0.410436	0.331	0.449	0.317413	Naive T	All other cells	ND1_7.Neftel_2019_10x Lymphocytes	1.16871	1.81254	0.1	1000
NUDT5	nudix hydrolase 5 [Source:HGNC Symbol;Acc:HGNC:8052]	1.68968e-05	-0.564514	0.119	0.219	0.322375	Naive T	All other cells	ND1_7.Neftel_2019_10x Lymphocytes	0.350559	0.69235	0.1	1000
DECR1	2,4-dienoyl-CoA reductase 1 [Source:HGNC Symbol;Acc:HGNC:2753]	1.69016e-05	-0.517418	0.14	0.263	0.322466	Naive T	All other cells	ND1_7.Neftel_2019_10x Lymphocytes	0.526916	0.951772	0.1	1000
EIF2S3	eukaryotic translation initiation factor 2 subunit gamma [Source:HGNC Symbol;Acc:HGNC:3267]	1.70358e-05	0.495316	0.334	0.228	0.325027	Naive T	All other cells	ND1_7.Neftel_2019_10x Lymphocytes	1.33632	0.77526	0.1	1000
RFXANK	regulatory factor X associated ankyrin containing protein [Source:HGNC Symbol;Acc:HGNC:9987]	1.71299e-05	-0.591458	0.066	0.153	0.326821	Naive T	All other cells	ND1_7.Neftel_2019_10x Lymphocytes	0.212906	0.465303	0.1	1000
SMARCE1	SWI/SNF related, matrix associated, actin dependent regulator of chromatin, subfamily e, member 1 [Source:HGNC Symbol;Acc:HGNC:11109]	1.71496e-05	-0.56151	0.11	0.217	0.327197	Naive T	All other cells	ND1_7.Neftel_2019_10x Lymphocytes	0.37232	0.728126	0.1	1000
TALDO1	transaldolase 1 [Source:HGNC Symbol;Acc:HGNC:11559]	1.71889e-05	-0.422216	0.275	0.38	0.327946	Naive T	All other cells	ND1_7.Neftel_2019_10x Lymphocytes	0.932956	1.47561	0.1	1000
NEDD9	neural precursor cell expressed, developmentally down-regulated 9 [Source:HGNC Symbol;Acc:HGNC:7733]	1.72258e-05	-0.61407	0.066	0.151	0.328652	Naive T	All other cells	ND1_7.Neftel_2019_10x Lymphocytes	0.235375	0.519752	0.1	1000
IFITM2	interferon induced transmembrane protein 2 [Source:HGNC Symbol;Acc:HGNC:5413]	1.73933e-05	-0.312607	0.746	0.786	0.331847	Naive T	All other cells	ND1_7.Neftel_2019_10x Lymphocytes	5.66364	7.7788	0.1	1000
PDIA6	protein disulfide isomerase family A member 6 [Source:HGNC Symbol;Acc:HGNC:30168]	1.74856e-05	-0.471626	0.254	0.375	0.333608	Naive T	All other cells	ND1_7.Neftel_2019_10x Lymphocytes	0.920076	1.53477	0.1	1000
HNRNPA3	heterogeneous nuclear ribonucleoprotein A3 [Source:HGNC Symbol;Acc:HGNC:24941]	1.75057e-05	-0.314453	0.421	0.558	0.333991	Naive T	All other cells	ND1_7.Neftel_2019_10x Lymphocytes	1.97067	2.7358	0.1	1000
TSEN15	tRNA splicing endonuclease subunit 15 [Source:HGNC Symbol;Acc:HGNC:16791]	1.76973e-05	-0.613945	0.051	0.139	0.337647	Naive T	All other cells	ND1_7.Neftel_2019_10x Lymphocytes	0.194216	0.443625	0.1	1000
SIPA1	signal-induced proliferation-associated 1 [Source:HGNC Symbol;Acc:HGNC:10885]	1.77901e-05	-0.728649	0.06	0.151	0.339418	Naive T	All other cells	ND1_7.Neftel_2019_10x Lymphocytes	0.196166	0.513739	0.1	1000
AGTRAP	angiotensin II receptor associated protein [Source:HGNC Symbol;Acc:HGNC:13539]	1.80662e-05	-0.741583	0.057	0.149	0.344684	Naive T	All other cells	ND1_7.Neftel_2019_10x Lymphocytes	0.199945	0.529662	0.1	1000
ZEB2	zinc finger E-box binding homeobox 2 [Source:HGNC Symbol;Acc:HGNC:14881]	1.88021e-05	-0.991809	0.024	0.105	0.358725	Naive T	All other cells	ND1_7.Neftel_2019_10x Lymphocytes	0.0800655	0.385476	0.1	1000
GTF2A2	general transcription factor IIA subunit 2 [Source:HGNC Symbol;Acc:HGNC:4647]	1.92135e-05	-0.413217	0.224	0.329	0.366574	Naive T	All other cells	ND1_7.Neftel_2019_10x Lymphocytes	0.729448	1.15386	0.1	1000
SAR1B	secretion associated Ras related GTPase 1B [Source:HGNC Symbol;Acc:HGNC:10535]	1.95485e-05	-0.638654	0.054	0.134	0.372966	Naive T	All other cells	ND1_7.Neftel_2019_10x Lymphocytes	0.171296	0.413816	0.1	1000
ABHD17A	abhydrolase domain containing 17A, depalmitoylase [Source:HGNC Symbol;Acc:HGNC:28756]	1.95903e-05	-0.662895	0.078	0.178	0.373763	Naive T	All other cells	ND1_7.Neftel_2019_10x Lymphocytes	0.256971	0.592667	0.1	1000
RGL4	ral guanine nucleotide dissociation stimulator like 4 [Source:HGNC Symbol;Acc:HGNC:31911]	2.00071e-05	-0.481821	0.158	0.267	0.381715	Naive T	All other cells	ND1_7.Neftel_2019_10x Lymphocytes	0.551215	0.954329	0.1	1000
ARL4A	ADP ribosylation factor like GTPase 4A [Source:HGNC Symbol;Acc:HGNC:695]	2.00101e-05	0.676658	0.188	0.108	0.381772	Naive T	All other cells	ND1_7.Neftel_2019_10x Lymphocytes	0.811466	0.36331	0.1	1000
DDX39A	DExD-box helicase 39A [Source:HGNC Symbol;Acc:HGNC:17821]	2.02489e-05	-0.465085	0.119	0.21	0.386329	Naive T	All other cells	ND1_7.Neftel_2019_10x Lymphocytes	0.42859	0.741594	0.1	1000
BRD2	bromodomain containing 2 [Source:HGNC Symbol;Acc:HGNC:1103]	2.02904e-05	-0.464521	0.173	0.292	0.38712	Naive T	All other cells	ND1_7.Neftel_2019_10x Lymphocytes	0.687817	1.15362	0.1	1000
ARPC4	actin related protein 2/3 complex subunit 4 [Source:HGNC Symbol;Acc:HGNC:707]	2.06203e-05	-0.422529	0.316	0.424	0.393414	Naive T	All other cells	ND1_7.Neftel_2019_10x Lymphocytes	1.20178	1.88628	0.1	1000
PSMD11	proteasome 26S subunit, non-ATPase 11 [Source:HGNC Symbol;Acc:HGNC:9556]	2.06339e-05	-0.552645	0.087	0.172	0.393674	Naive T	All other cells	ND1_7.Neftel_2019_10x Lymphocytes	0.280427	0.561122	0.1	1000
RAB11A	RAB11A, member RAS oncogene family [Source:HGNC Symbol;Acc:HGNC:9760]	2.0686e-05	-0.501947	0.212	0.335	0.394669	Naive T	All other cells	ND1_7.Neftel_2019_10x Lymphocytes	0.715836	1.24771	0.1	1000
ZNF90	zinc finger protein 90 [Source:HGNC Symbol;Acc:HGNC:13165]	2.08893e-05	0.456488	0.212	0.118	0.398547	Naive T	All other cells	ND1_7.Neftel_2019_10x Lymphocytes	0.810297	0.476677	0.1	1000
PGLS	6-phosphogluconolactonase [Source:HGNC Symbol;Acc:HGNC:8903]	2.09487e-05	-0.367148	0.203	0.325	0.39968	Naive T	All other cells	ND1_7.Neftel_2019_10x Lymphocytes	0.786968	1.18044	0.1	1000
TIMP1	TIMP metallopeptidase inhibitor 1 [Source:HGNC Symbol;Acc:HGNC:11820]	2.20791e-05	0.35961	0.367	0.24	0.421247	Naive T	All other cells	ND1_7.Neftel_2019_10x Lymphocytes	1.63755	1.11272	0.1	1000
SAMD9	sterile alpha motif domain containing 9 [Source:HGNC Symbol;Acc:HGNC:1348]	2.23862e-05	-0.586633	0.096	0.209	0.427107	Naive T	All other cells	ND1_7.Neftel_2019_10x Lymphocytes	0.400623	0.800082	0.1	1000
UQCRQ	ubiquinol-cytochrome c reductase complex III subunit VII [Source:HGNC Symbol;Acc:HGNC:29594]	2.24059e-05	-0.293682	0.445	0.544	0.427482	Naive T	All other cells	ND1_7.Neftel_2019_10x Lymphocytes	1.91529	2.60323	0.1	1000
NBEAL1	neurobeachin like 1 [Source:HGNC Symbol;Acc:HGNC:20681]	2.33579e-05	0.290396	0.4	0.294	0.445645	Naive T	All other cells	ND1_7.Neftel_2019_10x Lymphocytes	1.98398	1.45875	0.1	1000
MRPS6	mitochondrial ribosomal protein S6 [Source:HGNC Symbol;Acc:HGNC:14051]	2.40633e-05	-0.573232	0.167	0.279	0.459104	Naive T	All other cells	ND1_7.Neftel_2019_10x Lymphocytes	0.529166	1.01613	0.1	1000
HNRNPC	heterogeneous nuclear ribonucleoprotein C [Source:HGNC Symbol;Acc:HGNC:5035]	2.43199e-05	-0.383839	0.475	0.592	0.463999	Naive T	All other cells	ND1_7.Neftel_2019_10x Lymphocytes	2.01735	3.00808	0.1	1000
LSM7	LSM7 homolog, U6 small nuclear RNA and mRNA degradation associated [Source:HGNC Symbol;Acc:HGNC:20470]	2.43444e-05	-0.349163	0.361	0.49	0.464467	Naive T	All other cells	ND1_7.Neftel_2019_10x Lymphocytes	1.47327	2.1307	0.1	1000
PRKD2	protein kinase D2 [Source:HGNC Symbol;Acc:HGNC:17293]	2.47531e-05	-0.716874	0.048	0.129	0.472265	Naive T	All other cells	ND1_7.Neftel_2019_10x Lymphocytes	0.150247	0.412512	0.1	1000
GPS1	G protein pathway suppressor 1 [Source:HGNC Symbol;Acc:HGNC:4549]	2.4881e-05	-0.692015	0.057	0.149	0.474705	Naive T	All other cells	ND1_7.Neftel_2019_10x Lymphocytes	0.187474	0.474297	0.1	1000
CAPN2	calpain 2 [Source:HGNC Symbol;Acc:HGNC:1479]	2.54203e-05	-0.309612	0.167	0.278	0.484994	Naive T	All other cells	ND1_7.Neftel_2019_10x Lymphocytes	0.701661	0.992581	0.1	1000
C21orf91	chromosome 21 open reading frame 91 [Source:HGNC Symbol;Acc:HGNC:16459]	2.60501e-05	-0.56341	0.048	0.123	0.49701	Naive T	All other cells	ND1_7.Neftel_2019_10x Lymphocytes	0.181338	0.394214	0.1	1000
SSBP1	single stranded DNA binding protein 1 [Source:HGNC Symbol;Acc:HGNC:11317]	2.69009e-05	-0.351729	0.358	0.474	0.513242	Naive T	All other cells	ND1_7.Neftel_2019_10x Lymphocytes	1.31822	1.91603	0.1	1000
HSPA1B	heat shock protein family A (Hsp70) member 1B [Source:HGNC Symbol;Acc:HGNC:5233]	2.70652e-05	-1.09952	0.17	0.271	0.516377	Naive T	All other cells	ND1_7.Neftel_2019_10x Lymphocytes	2.33483	7.21111	0.1	1000
MEAF6	MYST/Esa1 associated factor 6 [Source:HGNC Symbol;Acc:HGNC:25674]	2.71581e-05	-0.439038	0.245	0.358	0.518149	Naive T	All other cells	ND1_7.Neftel_2019_10x Lymphocytes	0.838458	1.35575	0.1	1000
CISD1	CDGSH iron sulfur domain 1 [Source:HGNC Symbol;Acc:HGNC:30880]	2.72012e-05	-0.687555	0.051	0.13	0.518971	Naive T	All other cells	ND1_7.Neftel_2019_10x Lymphocytes	0.151602	0.400399	0.1	1000
EIF2S2	eukaryotic translation initiation factor 2 subunit beta [Source:HGNC Symbol;Acc:HGNC:3266]	2.74632e-05	-0.381398	0.23	0.361	0.52397	Naive T	All other cells	ND1_7.Neftel_2019_10x Lymphocytes	0.923809	1.3992	0.1	1000
CHST11	carbohydrate sulfotransferase 11 [Source:HGNC Symbol;Acc:HGNC:17422]	2.7623e-05	-0.677387	0.057	0.154	0.527019	Naive T	All other cells	ND1_7.Neftel_2019_10x Lymphocytes	0.199344	0.489326	0.1	1000
SPINT2	serine peptidase inhibitor, Kunitz type 2 [Source:HGNC Symbol;Acc:HGNC:11247]	2.76465e-05	0.547547	0.116	0.054	0.527467	Naive T	All other cells	ND1_7.Neftel_2019_10x Lymphocytes	0.358046	0.164919	0.1	1000
CTNNBL1	catenin beta like 1 [Source:HGNC Symbol;Acc:HGNC:15879]	2.83722e-05	-0.747258	0.048	0.133	0.541313	Naive T	All other cells	ND1_7.Neftel_2019_10x Lymphocytes	0.151021	0.429956	0.1	1000
PRR13	proline rich 13 [Source:HGNC Symbol;Acc:HGNC:24528]	2.93316e-05	-0.263608	0.481	0.613	0.559617	Naive T	All other cells	ND1_7.Neftel_2019_10x Lymphocytes	2.36978	3.11471	0.1	1000
PDZD11	PDZ domain containing 11 [Source:HGNC Symbol;Acc:HGNC:28034]	2.97671e-05	-0.540034	0.063	0.14	0.567926	Naive T	All other cells	ND1_7.Neftel_2019_10x Lymphocytes	0.214261	0.439292	0.1	1000
STIP1	stress induced phosphoprotein 1 [Source:HGNC Symbol;Acc:HGNC:11387]	3.02887e-05	-0.621153	0.081	0.167	0.577878	Naive T	All other cells	ND1_7.Neftel_2019_10x Lymphocytes	0.247164	0.546097	0.1	1000
NCF4	neutrophil cytosolic factor 4 [Source:HGNC Symbol;Acc:HGNC:7662]	3.06103e-05	-0.459088	0.069	0.151	0.584015	Naive T	All other cells	ND1_7.Neftel_2019_10x Lymphocytes	0.267608	0.481788	0.1	1000
EIF6	eukaryotic translation initiation factor 6 [Source:HGNC Symbol;Acc:HGNC:6159]	3.1126e-05	-0.500609	0.155	0.268	0.593852	Naive T	All other cells	ND1_7.Neftel_2019_10x Lymphocytes	0.505966	0.899678	0.1	1000
FOS	Fos proto-oncogene, AP-1 transcription factor subunit [Source:HGNC Symbol;Acc:HGNC:3796]	3.19367e-05	0.340044	0.767	0.679	0.60932	Naive T	All other cells	ND1_7.Neftel_2019_10x Lymphocytes	14.2475	10.1117	0.1	1000
MYC	MYC proto-oncogene, bHLH transcription factor [Source:HGNC Symbol;Acc:HGNC:7553]	3.21653e-05	0.475994	0.185	0.098	0.613682	Naive T	All other cells	ND1_7.Neftel_2019_10x Lymphocytes	0.721395	0.410305	0.1	1000
NASP	nuclear autoantigenic sperm protein [Source:HGNC Symbol;Acc:HGNC:7644]	3.22802e-05	-0.618754	0.128	0.229	0.615874	Naive T	All other cells	ND1_7.Neftel_2019_10x Lymphocytes	0.406801	0.840933	0.1	1000
GPR183	G protein-coupled receptor 183 [Source:HGNC Symbol;Acc:HGNC:3128]	3.25527e-05	0.31732	0.501	0.373	0.621072	Naive T	All other cells	ND1_7.Neftel_2019_10x Lymphocytes	2.91287	2.09366	0.1	1000
AURKAIP1	aurora kinase A interacting protein 1 [Source:HGNC Symbol;Acc:HGNC:24114]	3.32968e-05	-0.359189	0.278	0.419	0.63527	Naive T	All other cells	ND1_7.Neftel_2019_10x Lymphocytes	1.079	1.58853	0.1	1000
F2R	coagulation factor II thrombin receptor [Source:HGNC Symbol;Acc:HGNC:3537]	3.3336e-05	-0.597649	0.048	0.116	0.636018	Naive T	All other cells	ND1_7.Neftel_2019_10x Lymphocytes	0.194708	0.435732	0.1	1000
ARHGAP9	Rho GTPase activating protein 9 [Source:HGNC Symbol;Acc:HGNC:14130]	3.42981e-05	-0.579992	0.173	0.298	0.654373	Naive T	All other cells	ND1_7.Neftel_2019_10x Lymphocytes	0.595551	1.14227	0.1	1000
XAF1	XIAP associated factor 1 [Source:HGNC Symbol;Acc:HGNC:30932]	3.4514e-05	-0.520282	0.066	0.153	0.658493	Naive T	All other cells	ND1_7.Neftel_2019_10x Lymphocytes	0.287645	0.552214	0.1	1000
CLK1	CDC like kinase 1 [Source:HGNC Symbol;Acc:HGNC:2068]	3.53056e-05	-0.3789	0.227	0.361	0.673595	Naive T	All other cells	ND1_7.Neftel_2019_10x Lymphocytes	1.04295	1.56948	0.1	1000
ORMDL2	ORMDL sphingolipid biosynthesis regulator 2 [Source:HGNC Symbol;Acc:HGNC:16037]	3.54656e-05	-0.431571	0.152	0.245	0.676647	Naive T	All other cells	ND1_7.Neftel_2019_10x Lymphocytes	0.544505	0.892329	0.1	1000
RHOC	ras homolog family member C [Source:HGNC Symbol;Acc:HGNC:669]	3.5513e-05	-0.453748	0.197	0.328	0.677552	Naive T	All other cells	ND1_7.Neftel_2019_10x Lymphocytes	0.788599	1.29883	0.1	1000
ATF3	activating transcription factor 3 [Source:HGNC Symbol;Acc:HGNC:785]	3.56598e-05	-0.550221	0.039	0.108	0.680354	Naive T	All other cells	ND1_7.Neftel_2019_10x Lymphocytes	0.304193	0.600724	0.1	1000
SARAF	store-operated calcium entry associated regulatory factor [Source:HGNC Symbol;Acc:HGNC:28789]	3.63767e-05	0.253845	0.863	0.79	0.69403	Naive T	All other cells	ND1_7.Neftel_2019_10x Lymphocytes	11.1154	8.60103	0.1	1000
NDUFA6	NADH:ubiquinone oxidoreductase subunit A6 [Source:HGNC Symbol;Acc:HGNC:7690]	3.64562e-05	-0.350589	0.257	0.404	0.695548	Naive T	All other cells	ND1_7.Neftel_2019_10x Lymphocytes	1.1054	1.61155	0.1	1000
PDAP1	PDGFA associated protein 1 [Source:HGNC Symbol;Acc:HGNC:14634]	3.64859e-05	-0.377225	0.173	0.284	0.696115	Naive T	All other cells	ND1_7.Neftel_2019_10x Lymphocytes	0.662521	1.01193	0.1	1000
MAP4	microtubule associated protein 4 [Source:HGNC Symbol;Acc:HGNC:6862]	3.67656e-05	-0.57959	0.066	0.162	0.70145	Naive T	All other cells	ND1_7.Neftel_2019_10x Lymphocytes	0.267443	0.555998	0.1	1000
CMC2	C-X9-C motif containing 2 [Source:HGNC Symbol;Acc:HGNC:24447]	3.67816e-05	-0.496652	0.119	0.233	0.701756	Naive T	All other cells	ND1_7.Neftel_2019_10x Lymphocytes	0.46373	0.826328	0.1	1000
CREM	cAMP responsive element modulator [Source:HGNC Symbol;Acc:HGNC:2352]	3.71171e-05	-0.400439	0.313	0.453	0.708156	Naive T	All other cells	ND1_7.Neftel_2019_10x Lymphocytes	2.24018	3.39268	0.1	1000
CCT2	chaperonin containing TCP1 subunit 2 [Source:HGNC Symbol;Acc:HGNC:1615]	3.73676e-05	-0.389588	0.143	0.237	0.712936	Naive T	All other cells	ND1_7.Neftel_2019_10x Lymphocytes	0.50972	0.800174	0.1	1000
SEPT1		3.7816e-05	-0.313186	0.388	0.522	0.721491	Naive T	All other cells	ND1_7.Neftel_2019_10x Lymphocytes	1.68503	2.34152	0.1	1000
PARP14	poly(ADP-ribose) polymerase family member 14 [Source:HGNC Symbol;Acc:HGNC:29232]	3.79383e-05	-0.728656	0.054	0.142	0.723825	Naive T	All other cells	ND1_7.Neftel_2019_10x Lymphocytes	0.183235	0.486947	0.1	1000
ZFYVE28	zinc finger FYVE-type containing 28 [Source:HGNC Symbol;Acc:HGNC:29334]	3.85566e-05	-0.745043	0.039	0.114	0.735621	Naive T	All other cells	ND1_7.Neftel_2019_10x Lymphocytes	0.127896	0.380071	0.1	1000
DCP2	decapping mRNA 2 [Source:HGNC Symbol;Acc:HGNC:24452]	3.8733e-05	-0.473663	0.057	0.129	0.738986	Naive T	All other cells	ND1_7.Neftel_2019_10x Lymphocytes	0.227488	0.425902	0.1	1000
PSD4	pleckstrin and Sec7 domain containing 4 [Source:HGNC Symbol;Acc:HGNC:19096]	3.90777e-05	-0.728115	0.03	0.105	0.745563	Naive T	All other cells	ND1_7.Neftel_2019_10x Lymphocytes	0.106957	0.328643	0.1	1000
BTN3A2	butyrophilin subfamily 3 member A2 [Source:HGNC Symbol;Acc:HGNC:1139]	3.92492e-05	-0.657868	0.09	0.197	0.748836	Naive T	All other cells	ND1_7.Neftel_2019_10x Lymphocytes	0.337824	0.745295	0.1	1000
UQCC2	ubiquinol-cytochrome c reductase complex assembly factor 2 [Source:HGNC Symbol;Acc:HGNC:21237]	3.98869e-05	-0.49566	0.104	0.2	0.761002	Naive T	All other cells	ND1_7.Neftel_2019_10x Lymphocytes	0.36508	0.663467	0.1	1000
PRDX3	peroxiredoxin 3 [Source:HGNC Symbol;Acc:HGNC:9354]	3.99606e-05	-0.605387	0.125	0.233	0.762408	Naive T	All other cells	ND1_7.Neftel_2019_10x Lymphocytes	0.396771	0.810066	0.1	1000
DDX46	DEAD-box helicase 46 [Source:HGNC Symbol;Acc:HGNC:18681]	4.01388e-05	-0.357198	0.203	0.316	0.765808	Naive T	All other cells	ND1_7.Neftel_2019_10x Lymphocytes	0.777297	1.15394	0.1	1000
GABARAPL2	GABA type A receptor associated protein like 2 [Source:HGNC Symbol;Acc:HGNC:13291]	4.02366e-05	-0.300106	0.364	0.486	0.767673	Naive T	All other cells	ND1_7.Neftel_2019_10x Lymphocytes	1.56897	2.15312	0.1	1000
CD6	CD6 molecule [Source:HGNC Symbol;Acc:HGNC:1691]	4.05692e-05	-0.46719	0.242	0.353	0.77402	Naive T	All other cells	ND1_7.Neftel_2019_10x Lymphocytes	0.944483	1.56648	0.1	1000
GNAI3	G protein subunit alpha i3 [Source:HGNC Symbol;Acc:HGNC:4387]	4.09808e-05	-0.512974	0.107	0.206	0.781873	Naive T	All other cells	ND1_7.Neftel_2019_10x Lymphocytes	0.39171	0.721279	0.1	1000
MRPL10	mitochondrial ribosomal protein L10 [Source:HGNC Symbol;Acc:HGNC:14055]	4.12332e-05	-0.507375	0.093	0.18	0.786688	Naive T	All other cells	ND1_7.Neftel_2019_10x Lymphocytes	0.345521	0.639977	0.1	1000
HSBP1	heat shock factor binding protein 1 [Source:HGNC Symbol;Acc:HGNC:5203]	4.18893e-05	-0.360594	0.14	0.246	0.799205	Naive T	All other cells	ND1_7.Neftel_2019_10x Lymphocytes	0.542761	0.821836	0.1	1000
MIEN1	migration and invasion enhancer 1 [Source:HGNC Symbol;Acc:HGNC:28230]	4.27037e-05	-0.414007	0.182	0.309	0.814744	Naive T	All other cells	ND1_7.Neftel_2019_10x Lymphocytes	0.693693	1.10075	0.1	1000
DNAJA1	DnaJ heat shock protein family (Hsp40) member A1 [Source:HGNC Symbol;Acc:HGNC:5229]	4.29417e-05	-0.523037	0.23	0.36	0.819285	Naive T	All other cells	ND1_7.Neftel_2019_10x Lymphocytes	1.00198	1.7592	0.1	1000
CHCHD1	coiled-coil-helix-coiled-coil-helix domain containing 1 [Source:HGNC Symbol;Acc:HGNC:23518]	4.3296e-05	-0.498408	0.104	0.206	0.826045	Naive T	All other cells	ND1_7.Neftel_2019_10x Lymphocytes	0.353982	0.647299	0.1	1000
TUBB	tubulin beta class I [Source:HGNC Symbol;Acc:HGNC:20778]	4.55221e-05	-0.503301	0.343	0.462	0.868516	Naive T	All other cells	ND1_7.Neftel_2019_10x Lymphocytes	1.45755	2.47646	0.1	1000
EWSR1	EWS RNA binding protein 1 [Source:HGNC Symbol;Acc:HGNC:3508]	4.63962e-05	-0.341742	0.239	0.354	0.885194	Naive T	All other cells	ND1_7.Neftel_2019_10x Lymphocytes	0.937318	1.35992	0.1	1000
PSMC3	proteasome 26S subunit, ATPase 3 [Source:HGNC Symbol;Acc:HGNC:9549]	4.6457e-05	-0.537185	0.146	0.257	0.886354	Naive T	All other cells	ND1_7.Neftel_2019_10x Lymphocytes	0.484152	0.899591	0.1	1000
SNRNP25	small nuclear ribonucleoprotein U11/U12 subunit 25 [Source:HGNC Symbol;Acc:HGNC:14161]	4.64629e-05	-0.749448	0.036	0.112	0.886465	Naive T	All other cells	ND1_7.Neftel_2019_10x Lymphocytes	0.0989339	0.320911	0.1	1000
CCR6	C-C motif chemokine receptor 6 [Source:HGNC Symbol;Acc:HGNC:1607]	4.68985e-05	0.543999	0.161	0.08	0.894777	Naive T	All other cells	ND1_7.Neftel_2019_10x Lymphocytes	0.584833	0.297493	0.1	1000
NME1	NME/NM23 nucleoside diphosphate kinase 1 [Source:HGNC Symbol;Acc:HGNC:7849]	4.70467e-05	-0.772231	0.063	0.146	0.897605	Naive T	All other cells	ND1_7.Neftel_2019_10x Lymphocytes	0.178554	0.502955	0.1	1000
OPTN	optineurin [Source:HGNC Symbol;Acc:HGNC:17142]	4.75093e-05	-0.365512	0.2	0.304	0.90643	Naive T	All other cells	ND1_7.Neftel_2019_10x Lymphocytes	0.750901	1.12636	0.1	1000
AKAP13	A-kinase anchoring protein 13 [Source:HGNC Symbol;Acc:HGNC:371]	4.80977e-05	-0.414827	0.239	0.359	0.917657	Naive T	All other cells	ND1_7.Neftel_2019_10x Lymphocytes	0.908685	1.42726	0.1	1000
H2AFV		4.84189e-05	-0.368665	0.373	0.49	0.923784	Naive T	All other cells	ND1_7.Neftel_2019_10x Lymphocytes	1.53368	2.26198	0.1	1000
COMMD7	COMM domain containing 7 [Source:HGNC Symbol;Acc:HGNC:16223]	4.92943e-05	-0.377755	0.194	0.308	0.940486	Naive T	All other cells	ND1_7.Neftel_2019_10x Lymphocytes	0.70448	1.07374	0.1	1000
ETHE1	ETHE1 persulfide dioxygenase [Source:HGNC Symbol;Acc:HGNC:23287]	5.02937e-05	-0.535293	0.14	0.252	0.959554	Naive T	All other cells	ND1_7.Neftel_2019_10x Lymphocytes	0.458741	0.854301	0.1	1000
NDUFB7	NADH:ubiquinone oxidoreductase subunit B7 [Source:HGNC Symbol;Acc:HGNC:7702]	5.10678e-05	-0.300953	0.367	0.491	0.974322	Naive T	All other cells	ND1_7.Neftel_2019_10x Lymphocytes	1.48814	2.04581	0.1	1000
NFKBIB	NFKB inhibitor beta [Source:HGNC Symbol;Acc:HGNC:7798]	5.15792e-05	-0.797099	0.042	0.112	0.984079	Naive T	All other cells	ND1_7.Neftel_2019_10x Lymphocytes	0.120123	0.388475	0.1	1000
ITGB1BP1	integrin subunit beta 1 binding protein 1 [Source:HGNC Symbol;Acc:HGNC:23927]	5.17471e-05	-0.279371	0.143	0.248	0.987282	Naive T	All other cells	ND1_7.Neftel_2019_10x Lymphocytes	0.597095	0.821766	0.1	1000
ARHGDIA	Rho GDP dissociation inhibitor alpha [Source:HGNC Symbol;Acc:HGNC:678]	5.19687e-05	-0.319098	0.385	0.52	0.991512	Naive T	All other cells	ND1_7.Neftel_2019_10x Lymphocytes	1.63733	2.29037	0.1	1000
FKBP2	FKBP prolyl isomerase 2 [Source:HGNC Symbol;Acc:HGNC:3718]	5.2236e-05	-0.426192	0.188	0.302	0.99661	Naive T	All other cells	ND1_7.Neftel_2019_10x Lymphocytes	0.710198	1.14075	0.1	1000
PFDN2	prefoldin subunit 2 [Source:HGNC Symbol;Acc:HGNC:8867]	5.23978e-05	-0.3473	0.215	0.322	0.999697	Naive T	All other cells	ND1_7.Neftel_2019_10x Lymphocytes	0.812015	1.19072	0.1	1000
SIT1	signaling threshold regulating transmembrane adaptor 1 [Source:HGNC Symbol;Acc:HGNC:17710]	5.33934e-05	-0.459586	0.248	0.362	1	Naive T	All other cells	ND1_7.Neftel_2019_10x Lymphocytes	0.91439	1.5062	0.1	1000
SATB1	SATB homeobox 1 [Source:HGNC Symbol;Acc:HGNC:10541]	5.34257e-05	0.453718	0.176	0.093	1	Naive T	All other cells	ND1_7.Neftel_2019_10x Lymphocytes	0.543626	0.308871	0.1	1000
PRDX6	peroxiredoxin 6 [Source:HGNC Symbol;Acc:HGNC:16753]	5.38954e-05	-0.344344	0.343	0.454	1	Naive T	All other cells	ND1_7.Neftel_2019_10x Lymphocytes	1.33561	1.92574	0.1	1000
PSMC1	proteasome 26S subunit, ATPase 1 [Source:HGNC Symbol;Acc:HGNC:9547]	5.52374e-05	-0.60015	0.131	0.241	1	Naive T	All other cells	ND1_7.Neftel_2019_10x Lymphocytes	0.400346	0.811827	0.1	1000
SHMT2	serine hydroxymethyltransferase 2 [Source:HGNC Symbol;Acc:HGNC:10852]	5.64987e-05	-0.678014	0.048	0.123	1	Naive T	All other cells	ND1_7.Neftel_2019_10x Lymphocytes	0.139655	0.372112	0.1	1000
NDUFB3	NADH:ubiquinone oxidoreductase subunit B3 [Source:HGNC Symbol;Acc:HGNC:7698]	5.65826e-05	-0.408268	0.212	0.358	1	Naive T	All other cells	ND1_7.Neftel_2019_10x Lymphocytes	0.853786	1.33469	0.1	1000
ERICH1	glutamate rich 1 [Source:HGNC Symbol;Acc:HGNC:27234]	5.76264e-05	-0.521175	0.099	0.192	1	Naive T	All other cells	ND1_7.Neftel_2019_10x Lymphocytes	0.339634	0.640347	0.1	1000
NIN	ninein [Source:HGNC Symbol;Acc:HGNC:14906]	5.78154e-05	-0.502119	0.048	0.104	1	Naive T	All other cells	ND1_7.Neftel_2019_10x Lymphocytes	0.177931	0.359203	0.1	1000
BANF1	BAF nuclear assembly factor 1 [Source:HGNC Symbol;Acc:HGNC:17397]	5.84443e-05	-0.343399	0.236	0.368	1	Naive T	All other cells	ND1_7.Neftel_2019_10x Lymphocytes	0.945404	1.37374	0.1	1000
OSTF1	osteoclast stimulating factor 1 [Source:HGNC Symbol;Acc:HGNC:8510]	5.85287e-05	-0.429377	0.278	0.422	1	Naive T	All other cells	ND1_7.Neftel_2019_10x Lymphocytes	1.06982	1.6972	0.1	1000
IRF1	interferon regulatory factor 1 [Source:HGNC Symbol;Acc:HGNC:6116]	5.86395e-05	-0.426668	0.224	0.342	1	Naive T	All other cells	ND1_7.Neftel_2019_10x Lymphocytes	0.957055	1.51956	0.1	1000
ADA	adenosine deaminase [Source:HGNC Symbol;Acc:HGNC:186]	5.91284e-05	-0.542604	0.078	0.175	1	Naive T	All other cells	ND1_7.Neftel_2019_10x Lymphocytes	0.293888	0.577677	0.1	1000
DNAJC15	DnaJ heat shock protein family (Hsp40) member C15 [Source:HGNC Symbol;Acc:HGNC:20325]	5.91412e-05	-0.366116	0.182	0.299	1	Naive T	All other cells	ND1_7.Neftel_2019_10x Lymphocytes	0.694029	1.04509	0.1	1000
PDCD10	programmed cell death 10 [Source:HGNC Symbol;Acc:HGNC:8761]	5.93082e-05	-0.41696	0.149	0.251	1	Naive T	All other cells	ND1_7.Neftel_2019_10x Lymphocytes	0.542088	0.874267	0.1	1000
LAMTOR2	late endosomal/lysosomal adaptor, MAPK and MTOR activator 2 [Source:HGNC Symbol;Acc:HGNC:29796]	6.05526e-05	-0.395943	0.188	0.311	1	Naive T	All other cells	ND1_7.Neftel_2019_10x Lymphocytes	0.705407	1.09666	0.1	1000
SP140	SP140 nuclear body protein [Source:HGNC Symbol;Acc:HGNC:17133]	6.11093e-05	-0.5747	0.131	0.235	1	Naive T	All other cells	ND1_7.Neftel_2019_10x Lymphocytes	0.447346	0.872413	0.1	1000
PRPF38A	pre-mRNA processing factor 38A [Source:HGNC Symbol;Acc:HGNC:25930]	6.17908e-05	-0.424533	0.069	0.147	1	Naive T	All other cells	ND1_7.Neftel_2019_10x Lymphocytes	0.274278	0.472224	0.1	1000
JOSD2	Josephin domain containing 2 [Source:HGNC Symbol;Acc:HGNC:28853]	6.29951e-05	-0.491977	0.087	0.185	1	Naive T	All other cells	ND1_7.Neftel_2019_10x Lymphocytes	0.326665	0.59783	0.1	1000
TUBA1B	tubulin alpha 1b [Source:HGNC Symbol;Acc:HGNC:18809]	6.34352e-05	-0.545637	0.478	0.577	1	Naive T	All other cells	ND1_7.Neftel_2019_10x Lymphocytes	2.24003	3.93821	0.1	1000
TPST2	tyrosylprotein sulfotransferase 2 [Source:HGNC Symbol;Acc:HGNC:12021]	6.37658e-05	-0.481171	0.066	0.149	1	Naive T	All other cells	ND1_7.Neftel_2019_10x Lymphocytes	0.273728	0.50468	0.1	1000
TSEN54	tRNA splicing endonuclease subunit 54 [Source:HGNC Symbol;Acc:HGNC:27561]	6.51259e-05	-0.334702	0.161	0.26	1	Naive T	All other cells	ND1_7.Neftel_2019_10x Lymphocytes	0.61868	0.904372	0.1	1000
GALM	galactose mutarotase [Source:HGNC Symbol;Acc:HGNC:24063]	6.53079e-05	-0.622324	0.101	0.206	1	Naive T	All other cells	ND1_7.Neftel_2019_10x Lymphocytes	0.33451	0.709602	0.1	1000
FIBP	FGF1 intracellular binding protein [Source:HGNC Symbol;Acc:HGNC:3705]	6.58637e-05	-0.469719	0.158	0.257	1	Naive T	All other cells	ND1_7.Neftel_2019_10x Lymphocytes	0.521472	0.894073	0.1	1000
PCNA	proliferating cell nuclear antigen [Source:HGNC Symbol;Acc:HGNC:8729]	6.74581e-05	-0.688192	0.087	0.165	1	Naive T	All other cells	ND1_7.Neftel_2019_10x Lymphocytes	0.279358	0.654966	0.1	1000
SPNS3	sphingolipid transporter 3 (putative) [Source:HGNC Symbol;Acc:HGNC:28433]	6.83529e-05	-0.653922	0.039	0.113	1	Naive T	All other cells	ND1_7.Neftel_2019_10x Lymphocytes	0.149068	0.378974	0.1	1000
HAUS1	HAUS augmin like complex subunit 1 [Source:HGNC Symbol;Acc:HGNC:25174]	6.91448e-05	-0.614625	0.048	0.124	1	Naive T	All other cells	ND1_7.Neftel_2019_10x Lymphocytes	0.15878	0.378474	0.1	1000
APBB1IP	amyloid beta precursor protein binding family B member 1 interacting protein [Source:HGNC Symbol;Acc:HGNC:17379]	6.95202e-05	-0.356326	0.233	0.354	1	Naive T	All other cells	ND1_7.Neftel_2019_10x Lymphocytes	0.879245	1.29843	0.1	1000
GNPTAB	N-acetylglucosamine-1-phosphate transferase subunits alpha and beta [Source:HGNC Symbol;Acc:HGNC:29670]	6.98801e-05	-0.619032	0.081	0.173	1	Naive T	All other cells	ND1_7.Neftel_2019_10x Lymphocytes	0.291917	0.627841	0.1	1000
TBCD	tubulin folding cofactor D [Source:HGNC Symbol;Acc:HGNC:11581]	7.04605e-05	-0.746977	0.051	0.139	1	Naive T	All other cells	ND1_7.Neftel_2019_10x Lymphocytes	0.166871	0.46326	0.1	1000
CHMP5	charged multivesicular body protein 5 [Source:HGNC Symbol;Acc:HGNC:26942]	7.10735e-05	-0.43626	0.149	0.256	1	Naive T	All other cells	ND1_7.Neftel_2019_10x Lymphocytes	0.53523	0.882643	0.1	1000
CKS2	CDC28 protein kinase regulatory subunit 2 [Source:HGNC Symbol;Acc:HGNC:2000]	7.14261e-05	-0.653541	0.093	0.188	1	Naive T	All other cells	ND1_7.Neftel_2019_10x Lymphocytes	0.381516	0.825636	0.1	1000
BATF	basic leucine zipper ATF-like transcription factor [Source:HGNC Symbol;Acc:HGNC:958]	7.17749e-05	-0.523213	0.116	0.216	1	Naive T	All other cells	ND1_7.Neftel_2019_10x Lymphocytes	0.514396	0.936757	0.1	1000
MRPL47	mitochondrial ribosomal protein L47 [Source:HGNC Symbol;Acc:HGNC:16652]	7.20583e-05	-0.403865	0.119	0.206	1	Naive T	All other cells	ND1_7.Neftel_2019_10x Lymphocytes	0.400704	0.649855	0.1	1000
MIF4GD	MIF4G domain containing [Source:HGNC Symbol;Acc:HGNC:24030]	7.61742e-05	-0.584898	0.072	0.169	1	Naive T	All other cells	ND1_7.Neftel_2019_10x Lymphocytes	0.255531	0.538109	0.1	1000
SNRPA1	small nuclear ribonucleoprotein polypeptide A' [Source:HGNC Symbol;Acc:HGNC:11152]	7.66318e-05	-0.574903	0.119	0.224	1	Naive T	All other cells	ND1_7.Neftel_2019_10x Lymphocytes	0.386592	0.764653	0.1	1000
DAXX	death domain associated protein [Source:HGNC Symbol;Acc:HGNC:2681]	7.7223e-05	-0.531004	0.069	0.142	1	Naive T	All other cells	ND1_7.Neftel_2019_10x Lymphocytes	0.248495	0.492665	0.1	1000
SKAP1	src kinase associated phosphoprotein 1 [Source:HGNC Symbol;Acc:HGNC:15605]	7.73389e-05	-0.365684	0.254	0.397	1	Naive T	All other cells	ND1_7.Neftel_2019_10x Lymphocytes	1.08636	1.61014	0.1	1000
NSG1	neuronal vesicle trafficking associated 1 [Source:HGNC Symbol;Acc:HGNC:18790]	7.75719e-05	0.42371	0.113	0.053	1	Naive T	All other cells	ND1_7.Neftel_2019_10x Lymphocytes	0.332128	0.182877	0.1	1000
PPP1R12A	protein phosphatase 1 regulatory subunit 12A [Source:HGNC Symbol;Acc:HGNC:7618]	7.76633e-05	-0.469717	0.17	0.275	1	Naive T	All other cells	ND1_7.Neftel_2019_10x Lymphocytes	0.60759	1.03182	0.1	1000
SEC13	SEC13 homolog, nuclear pore and COPII coat complex component [Source:HGNC Symbol;Acc:HGNC:10697]	7.79406e-05	-0.471039	0.084	0.177	1	Naive T	All other cells	ND1_7.Neftel_2019_10x Lymphocytes	0.320343	0.573245	0.1	1000
ARID5A	AT-rich interaction domain 5A [Source:HGNC Symbol;Acc:HGNC:17361]	7.9474e-05	-0.413449	0.167	0.284	1	Naive T	All other cells	ND1_7.Neftel_2019_10x Lymphocytes	0.663552	1.05451	0.1	1000
SEC61B	SEC61 translocon subunit beta [Source:HGNC Symbol;Acc:HGNC:16993]	8.1663e-05	-0.270087	0.516	0.647	1	Naive T	All other cells	ND1_7.Neftel_2019_10x Lymphocytes	2.59614	3.43215	0.1	1000
MIR155HG	MIR155 host gene [Source:HGNC Symbol;Acc:HGNC:35460]	8.20151e-05	-0.610903	0.036	0.105	1	Naive T	All other cells	ND1_7.Neftel_2019_10x Lymphocytes	0.214283	0.47894	0.1	1000
LRPAP1	LDL receptor related protein associated protein 1 [Source:HGNC Symbol;Acc:HGNC:6701]	8.22117e-05	-0.435804	0.155	0.261	1	Naive T	All other cells	ND1_7.Neftel_2019_10x Lymphocytes	0.541058	0.891209	0.1	1000
RBM8A	RNA binding motif protein 8A [Source:HGNC Symbol;Acc:HGNC:9905]	8.22435e-05	-0.263967	0.406	0.517	1	Naive T	All other cells	ND1_7.Neftel_2019_10x Lymphocytes	1.78725	2.35737	0.1	1000
DCTN3	dynactin subunit 3 [Source:HGNC Symbol;Acc:HGNC:2713]	8.28342e-05	-0.337779	0.257	0.371	1	Naive T	All other cells	ND1_7.Neftel_2019_10x Lymphocytes	0.935187	1.35116	0.1	1000
TAPBP	TAP binding protein [Source:HGNC Symbol;Acc:HGNC:11566]	8.30909e-05	-0.407531	0.304	0.421	1	Naive T	All other cells	ND1_7.Neftel_2019_10x Lymphocytes	1.1653	1.80187	0.1	1000
EIF4B	eukaryotic translation initiation factor 4B [Source:HGNC Symbol;Acc:HGNC:3285]	8.37019e-05	0.376145	0.448	0.362	1	Naive T	All other cells	ND1_7.Neftel_2019_10x Lymphocytes	2.0174	1.3536	0.1	1000
PTRHD1	peptidyl-tRNA hydrolase domain containing 1 [Source:HGNC Symbol;Acc:HGNC:33782]	8.3987e-05	-0.483854	0.14	0.23	1	Naive T	All other cells	ND1_7.Neftel_2019_10x Lymphocytes	0.473312	0.830093	0.1	1000
ERCC1	ERCC excision repair 1, endonuclease non-catalytic subunit [Source:HGNC Symbol;Acc:HGNC:3433]	8.53446e-05	-0.537513	0.084	0.175	1	Naive T	All other cells	ND1_7.Neftel_2019_10x Lymphocytes	0.277792	0.546684	0.1	1000
PLEKHF1	pleckstrin homology and FYVE domain containing 1 [Source:HGNC Symbol;Acc:HGNC:20764]	8.63258e-05	-0.843153	0.045	0.128	1	Naive T	All other cells	ND1_7.Neftel_2019_10x Lymphocytes	0.127522	0.428688	0.1	1000
FKBP3	FKBP prolyl isomerase 3 [Source:HGNC Symbol;Acc:HGNC:3719]	8.80987e-05	-0.455332	0.125	0.222	1	Naive T	All other cells	ND1_7.Neftel_2019_10x Lymphocytes	0.459436	0.782062	0.1	1000
MAPRE2	microtubule associated protein RP/EB family member 2 [Source:HGNC Symbol;Acc:HGNC:6891]	8.81687e-05	-0.61519	0.066	0.139	1	Naive T	All other cells	ND1_7.Neftel_2019_10x Lymphocytes	0.222149	0.495977	0.1	1000
MPST	mercaptopyruvate sulfurtransferase [Source:HGNC Symbol;Acc:HGNC:7223]	8.99526e-05	-0.590339	0.048	0.13	1	Naive T	All other cells	ND1_7.Neftel_2019_10x Lymphocytes	0.162605	0.373896	0.1	1000
HM13	histocompatibility minor 13 [Source:HGNC Symbol;Acc:HGNC:16435]	9.01235e-05	-0.509172	0.125	0.235	1	Naive T	All other cells	ND1_7.Neftel_2019_10x Lymphocytes	0.442104	0.802013	0.1	1000
SDHC	succinate dehydrogenase complex subunit C [Source:HGNC Symbol;Acc:HGNC:10682]	9.25379e-05	-0.308223	0.194	0.296	1	Naive T	All other cells	ND1_7.Neftel_2019_10x Lymphocytes	0.730384	1.03016	0.1	1000
PARP10	poly(ADP-ribose) polymerase family member 10 [Source:HGNC Symbol;Acc:HGNC:25895]	9.25419e-05	-0.600832	0.057	0.126	1	Naive T	All other cells	ND1_7.Neftel_2019_10x Lymphocytes	0.181559	0.413461	0.1	1000
NUDT21	nudix hydrolase 21 [Source:HGNC Symbol;Acc:HGNC:13870]	9.42859e-05	-0.468332	0.125	0.219	1	Naive T	All other cells	ND1_7.Neftel_2019_10x Lymphocytes	0.41939	0.729635	0.1	1000
TNF	tumor necrosis factor [Source:HGNC Symbol;Acc:HGNC:11892]	9.44427e-05	-0.753009	0.072	0.154	1	Naive T	All other cells	ND1_7.Neftel_2019_10x Lymphocytes	0.619925	1.42868	0.1	1000
AP2M1	adaptor related protein complex 2 subunit mu 1 [Source:HGNC Symbol;Acc:HGNC:564]	9.44963e-05	-0.3874	0.272	0.385	1	Naive T	All other cells	ND1_7.Neftel_2019_10x Lymphocytes	0.963348	1.46647	0.1	1000
TIMM8B	translocase of inner mitochondrial membrane 8 homolog B [Source:HGNC Symbol;Acc:HGNC:11818]	9.64577e-05	-0.565737	0.128	0.241	1	Naive T	All other cells	ND1_7.Neftel_2019_10x Lymphocytes	0.434866	0.841762	0.1	1000
FYN	FYN proto-oncogene, Src family tyrosine kinase [Source:HGNC Symbol;Acc:HGNC:4037]	9.70808e-05	-0.438454	0.26	0.374	1	Naive T	All other cells	ND1_7.Neftel_2019_10x Lymphocytes	1.06696	1.70915	0.1	1000
PARP1	poly(ADP-ribose) polymerase 1 [Source:HGNC Symbol;Acc:HGNC:270]	9.82216e-05	-0.454368	0.209	0.327	1	Naive T	All other cells	ND1_7.Neftel_2019_10x Lymphocytes	0.734132	1.21391	0.1	1000
CYB561D2	cytochrome b561 family member D2 [Source:NCBI gene (formerly Entrezgene);Acc:11068]	9.82989e-05	-0.596505	0.081	0.174	1	Naive T	All other cells	ND1_7.Neftel_2019_10x Lymphocytes	0.258561	0.551061	0.1	1000
REL	REL proto-oncogene, NF-kB subunit [Source:HGNC Symbol;Acc:HGNC:9954]	9.84166e-05	-0.409696	0.131	0.237	1	Naive T	All other cells	ND1_7.Neftel_2019_10x Lymphocytes	0.624638	0.991565	0.1	1000
ZCCHC17	zinc finger CCHC-type containing 17 [Source:HGNC Symbol;Acc:HGNC:30246]	9.84608e-05	-0.595487	0.06	0.132	1	Naive T	All other cells	ND1_7.Neftel_2019_10x Lymphocytes	0.20261	0.448908	0.1	1000
METTL23	methyltransferase like 23 [Source:HGNC Symbol;Acc:HGNC:26988]	0.000101788	-0.474258	0.146	0.261	1	Naive T	All other cells	ND1_7.Neftel_2019_10x Lymphocytes	0.520894	0.897666	0.1	1000
PRKACB	protein kinase cAMP-activated catalytic subunit beta [Source:HGNC Symbol;Acc:HGNC:9381]	0.000101794	-0.647137	0.078	0.16	1	Naive T	All other cells	ND1_7.Neftel_2019_10x Lymphocytes	0.237815	0.545248	0.1	1000
TMEM9B	TMEM9 domain family member B [Source:HGNC Symbol;Acc:HGNC:1168]	0.000103773	-0.479103	0.152	0.267	1	Naive T	All other cells	ND1_7.Neftel_2019_10x Lymphocytes	0.534337	0.924217	0.1	1000
SYNE1	spectrin repeat containing nuclear envelope protein 1 [Source:HGNC Symbol;Acc:HGNC:17089]	0.000104303	-0.698369	0.075	0.17	1	Naive T	All other cells	ND1_7.Neftel_2019_10x Lymphocytes	0.271076	0.646038	0.1	1000
RPS6KA1	ribosomal protein S6 kinase A1 [Source:HGNC Symbol;Acc:HGNC:10430]	0.000107004	-0.610216	0.057	0.148	1	Naive T	All other cells	ND1_7.Neftel_2019_10x Lymphocytes	0.208836	0.468514	0.1	1000
ARAP2	ArfGAP with RhoGAP domain, ankyrin repeat and PH domain 2 [Source:HGNC Symbol;Acc:HGNC:16924]	0.00011288	-0.567064	0.078	0.155	1	Naive T	All other cells	ND1_7.Neftel_2019_10x Lymphocytes	0.276204	0.56328	0.1	1000
TMEM205	transmembrane protein 205 [Source:HGNC Symbol;Acc:HGNC:29631]	0.000114995	-0.532831	0.063	0.135	1	Naive T	All other cells	ND1_7.Neftel_2019_10x Lymphocytes	0.208375	0.425393	0.1	1000
EIF3L	eukaryotic translation initiation factor 3 subunit L [Source:HGNC Symbol;Acc:HGNC:18138]	0.000115086	0.311523	0.543	0.485	1	Naive T	All other cells	ND1_7.Neftel_2019_10x Lymphocytes	2.9055	2.10102	0.1	1000
RAD21	RAD21 cohesin complex component [Source:HGNC Symbol;Acc:HGNC:9811]	0.000118753	-0.422336	0.146	0.237	1	Naive T	All other cells	ND1_7.Neftel_2019_10x Lymphocytes	0.519818	0.845546	0.1	1000
PSMB7	proteasome 20S subunit beta 7 [Source:HGNC Symbol;Acc:HGNC:9544]	0.000119011	-0.461862	0.221	0.347	1	Naive T	All other cells	ND1_7.Neftel_2019_10x Lymphocytes	0.752881	1.25354	0.1	1000
MDH2	malate dehydrogenase 2 [Source:HGNC Symbol;Acc:HGNC:6971]	0.000120627	-0.296142	0.34	0.43	1	Naive T	All other cells	ND1_7.Neftel_2019_10x Lymphocytes	1.26627	1.73717	0.1	1000
NCOR1	nuclear receptor corepressor 1 [Source:HGNC Symbol;Acc:HGNC:7672]	0.000120852	-0.334243	0.266	0.388	1	Naive T	All other cells	ND1_7.Neftel_2019_10x Lymphocytes	1.04682	1.50197	0.1	1000
ODC1	ornithine decarboxylase 1 [Source:HGNC Symbol;Acc:HGNC:8109]	0.000121615	-0.633545	0.101	0.201	1	Naive T	All other cells	ND1_7.Neftel_2019_10x Lymphocytes	0.323992	0.698918	0.1	1000
GLO1	glyoxalase I [Source:HGNC Symbol;Acc:HGNC:4323]	0.000122021	-0.52289	0.09	0.179	1	Naive T	All other cells	ND1_7.Neftel_2019_10x Lymphocytes	0.284699	0.548948	0.1	1000
SET	SET nuclear proto-oncogene [Source:HGNC Symbol;Acc:HGNC:10760]	0.000122244	-0.348465	0.26	0.365	1	Naive T	All other cells	ND1_7.Neftel_2019_10x Lymphocytes	0.975477	1.42383	0.1	1000
DBNL	drebrin like [Source:HGNC Symbol;Acc:HGNC:2696]	0.000122481	-0.566337	0.176	0.298	1	Naive T	All other cells	ND1_7.Neftel_2019_10x Lymphocytes	0.558709	1.06051	0.1	1000
ANKRD39	ankyrin repeat domain 39 [Source:HGNC Symbol;Acc:HGNC:28640]	0.000123812	-0.548343	0.054	0.13	1	Naive T	All other cells	ND1_7.Neftel_2019_10x Lymphocytes	0.189758	0.401393	0.1	1000
P4HB	prolyl 4-hydroxylase subunit beta [Source:HGNC Symbol;Acc:HGNC:8548]	0.000125897	-0.337104	0.296	0.392	1	Naive T	All other cells	ND1_7.Neftel_2019_10x Lymphocytes	1.09723	1.57718	0.1	1000
MRPL20	mitochondrial ribosomal protein L20 [Source:HGNC Symbol;Acc:HGNC:14478]	0.000127304	-0.421981	0.284	0.412	1	Naive T	All other cells	ND1_7.Neftel_2019_10x Lymphocytes	1.05873	1.66703	0.1	1000
SRM	spermidine synthase [Source:HGNC Symbol;Acc:HGNC:11296]	0.000127476	-0.648387	0.048	0.118	1	Naive T	All other cells	ND1_7.Neftel_2019_10x Lymphocytes	0.143251	0.365206	0.1	1000
ERP44	endoplasmic reticulum protein 44 [Source:HGNC Symbol;Acc:HGNC:18311]	0.000129295	-0.492422	0.125	0.221	1	Naive T	All other cells	ND1_7.Neftel_2019_10x Lymphocytes	0.398581	0.715816	0.1	1000
IFI44L	interferon induced protein 44 like [Source:HGNC Symbol;Acc:HGNC:17817]	0.000133204	-0.486138	0.113	0.206	1	Naive T	All other cells	ND1_7.Neftel_2019_10x Lymphocytes	0.605776	1.04761	0.1	1000
SH3BP1	SH3 domain binding protein 1 [Source:HGNC Symbol;Acc:HGNC:10824]	0.000133319	-0.431834	0.09	0.176	1	Naive T	All other cells	ND1_7.Neftel_2019_10x Lymphocytes	0.350803	0.594272	0.1	1000
ARHGEF1	Rho guanine nucleotide exchange factor 1 [Source:HGNC Symbol;Acc:HGNC:681]	0.000134315	-0.295774	0.266	0.369	1	Naive T	All other cells	ND1_7.Neftel_2019_10x Lymphocytes	1.06	1.45924	0.1	1000
HSPD1	heat shock protein family D (Hsp60) member 1 [Source:HGNC Symbol;Acc:HGNC:5261]	0.000135365	-0.455877	0.242	0.335	1	Naive T	All other cells	ND1_7.Neftel_2019_10x Lymphocytes	0.980159	1.60401	0.1	1000
PARP8	poly(ADP-ribose) polymerase family member 8 [Source:HGNC Symbol;Acc:HGNC:26124]	0.00013541	-0.317337	0.203	0.302	1	Naive T	All other cells	ND1_7.Neftel_2019_10x Lymphocytes	0.911636	1.28945	0.1	1000
DR1	down-regulator of transcription 1 [Source:HGNC Symbol;Acc:HGNC:3017]	0.000135957	-0.375562	0.122	0.206	1	Naive T	All other cells	ND1_7.Neftel_2019_10x Lymphocytes	0.45552	0.708731	0.1	1000
HMGB2	high mobility group box 2 [Source:HGNC Symbol;Acc:HGNC:5000]	0.000137363	-0.425647	0.382	0.503	1	Naive T	All other cells	ND1_7.Neftel_2019_10x Lymphocytes	2.04824	3.18806	0.1	1000
SPCS2	signal peptidase complex subunit 2 [Source:HGNC Symbol;Acc:HGNC:28962]	0.000140027	-0.330657	0.403	0.488	1	Naive T	All other cells	ND1_7.Neftel_2019_10x Lymphocytes	1.50607	2.13547	0.1	1000
IDS	iduronate 2-sulfatase [Source:HGNC Symbol;Acc:HGNC:5389]	0.000145643	-0.381264	0.215	0.334	1	Naive T	All other cells	ND1_7.Neftel_2019_10x Lymphocytes	0.889701	1.34905	0.1	1000
TUBA1C	tubulin alpha 1c [Source:HGNC Symbol;Acc:HGNC:20768]	0.000146656	-0.474745	0.072	0.141	1	Naive T	All other cells	ND1_7.Neftel_2019_10x Lymphocytes	0.250638	0.463688	0.1	1000
NIP7	nucleolar pre-rRNA processing protein NIP7 [Source:HGNC Symbol;Acc:HGNC:24328]	0.000151764	-0.537355	0.054	0.122	1	Naive T	All other cells	ND1_7.Neftel_2019_10x Lymphocytes	0.173699	0.368429	0.1	1000
SIRT2	sirtuin 2 [Source:HGNC Symbol;Acc:HGNC:10886]	0.000152749	-0.445457	0.063	0.139	1	Naive T	All other cells	ND1_7.Neftel_2019_10x Lymphocytes	0.257094	0.457497	0.1	1000
TMEM14A	transmembrane protein 14A [Source:HGNC Symbol;Acc:HGNC:21076]	0.000155052	-0.471761	0.093	0.178	1	Naive T	All other cells	ND1_7.Neftel_2019_10x Lymphocytes	0.324911	0.581052	0.1	1000
ATP6V0C	ATPase H+ transporting V0 subunit c [Source:HGNC Symbol;Acc:HGNC:855]	0.000156229	-0.529678	0.09	0.155	1	Naive T	All other cells	ND1_7.Neftel_2019_10x Lymphocytes	0.40403	0.756038	0.1	1000
SLF1	SMC5-SMC6 complex localization factor 1 [Source:HGNC Symbol;Acc:HGNC:25408]	0.000162249	-0.539998	0.054	0.129	1	Naive T	All other cells	ND1_7.Neftel_2019_10x Lymphocytes	0.208495	0.429378	0.1	1000
ARF3	ADP ribosylation factor 3 [Source:HGNC Symbol;Acc:HGNC:654]	0.000164591	-0.555326	0.063	0.133	1	Naive T	All other cells	ND1_7.Neftel_2019_10x Lymphocytes	0.185531	0.39754	0.1	1000
EMC7	ER membrane protein complex subunit 7 [Source:HGNC Symbol;Acc:HGNC:24301]	0.000164605	-0.405228	0.137	0.244	1	Naive T	All other cells	ND1_7.Neftel_2019_10x Lymphocytes	0.510631	0.81573	0.1	1000
HCLS1	hematopoietic cell-specific Lyn substrate 1 [Source:HGNC Symbol;Acc:HGNC:4844]	0.000167995	-0.278264	0.385	0.5	1	Naive T	All other cells	ND1_7.Neftel_2019_10x Lymphocytes	1.65076	2.21246	0.1	1000
MORF4L2	mortality factor 4 like 2 [Source:HGNC Symbol;Acc:HGNC:16849]	0.000168311	-0.703281	0.063	0.15	1	Naive T	All other cells	ND1_7.Neftel_2019_10x Lymphocytes	0.20129	0.508718	0.1	1000
ADD3	adducin 3 [Source:HGNC Symbol;Acc:HGNC:245]	0.000169734	0.41311	0.23	0.151	1	Naive T	All other cells	ND1_7.Neftel_2019_10x Lymphocytes	0.844624	0.524954	0.1	1000
CAPZA2	capping actin protein of muscle Z-line subunit alpha 2 [Source:HGNC Symbol;Acc:HGNC:1490]	0.000170367	-0.368072	0.176	0.281	1	Naive T	All other cells	ND1_7.Neftel_2019_10x Lymphocytes	0.642384	0.972705	0.1	1000
RANBP1	RAN binding protein 1 [Source:HGNC Symbol;Acc:HGNC:9847]	0.000172693	-0.339723	0.299	0.387	1	Naive T	All other cells	ND1_7.Neftel_2019_10x Lymphocytes	1.09166	1.57376	0.1	1000
DIAPH1	diaphanous related formin 1 [Source:HGNC Symbol;Acc:HGNC:2876]	0.000174057	-0.344982	0.119	0.2	1	Naive T	All other cells	ND1_7.Neftel_2019_10x Lymphocytes	0.457566	0.687264	0.1	1000
PTK2B	protein tyrosine kinase 2 beta [Source:HGNC Symbol;Acc:HGNC:9612]	0.00017673	-0.692741	0.066	0.147	1	Naive T	All other cells	ND1_7.Neftel_2019_10x Lymphocytes	0.199739	0.499235	0.1	1000
MLF2	myeloid leukemia factor 2 [Source:HGNC Symbol;Acc:HGNC:7126]	0.000178872	-0.498587	0.146	0.253	1	Naive T	All other cells	ND1_7.Neftel_2019_10x Lymphocytes	0.495447	0.88034	0.1	1000
EIF3D	eukaryotic translation initiation factor 3 subunit D [Source:HGNC Symbol;Acc:HGNC:3278]	0.000180196	0.369861	0.49	0.394	1	Naive T	All other cells	ND1_7.Neftel_2019_10x Lymphocytes	2.28023	1.54434	0.1	1000
ARHGEF6	Rac/Cdc42 guanine nucleotide exchange factor 6 [Source:HGNC Symbol;Acc:HGNC:685]	0.000180797	-0.670569	0.036	0.108	1	Naive T	All other cells	ND1_7.Neftel_2019_10x Lymphocytes	0.121566	0.33324	0.1	1000
COPB1	COPI coat complex subunit beta 1 [Source:HGNC Symbol;Acc:HGNC:2231]	0.000180961	-0.698669	0.072	0.163	1	Naive T	All other cells	ND1_7.Neftel_2019_10x Lymphocytes	0.212825	0.529115	0.1	1000
OS9	OS9 endoplasmic reticulum lectin [Source:HGNC Symbol;Acc:HGNC:16994]	0.000183182	-0.556296	0.099	0.199	1	Naive T	All other cells	ND1_7.Neftel_2019_10x Lymphocytes	0.344469	0.675242	0.1	1000
EBP	EBP cholestenol delta-isomerase [Source:HGNC Symbol;Acc:HGNC:3133]	0.000190971	-0.539831	0.113	0.215	1	Naive T	All other cells	ND1_7.Neftel_2019_10x Lymphocytes	0.383261	0.729138	0.1	1000
COX16	cytochrome c oxidase assembly factor COX16 [Source:HGNC Symbol;Acc:HGNC:20213]	0.000191925	-0.651507	0.045	0.112	1	Naive T	All other cells	ND1_7.Neftel_2019_10x Lymphocytes	0.161414	0.401505	0.1	1000
PCMT1	protein-L-isoaspartate (D-aspartate) O-methyltransferase [Source:HGNC Symbol;Acc:HGNC:8728]	0.000195446	-0.406507	0.164	0.265	1	Naive T	All other cells	ND1_7.Neftel_2019_10x Lymphocytes	0.591857	0.938867	0.1	1000
COA1	cytochrome c oxidase assembly factor 1 homolog [Source:HGNC Symbol;Acc:HGNC:21868]	0.000196776	-0.601535	0.081	0.167	1	Naive T	All other cells	ND1_7.Neftel_2019_10x Lymphocytes	0.262778	0.56204	0.1	1000
SIRT7	sirtuin 7 [Source:HGNC Symbol;Acc:HGNC:14935]	0.000196974	-0.554316	0.054	0.135	1	Naive T	All other cells	ND1_7.Neftel_2019_10x Lymphocytes	0.212331	0.44369	0.1	1000
SFT2D1	SFT2 domain containing 1 [Source:HGNC Symbol;Acc:HGNC:21102]	0.000198618	-0.482527	0.125	0.215	1	Naive T	All other cells	ND1_7.Neftel_2019_10x Lymphocytes	0.406457	0.720542	0.1	1000
TXK	TXK tyrosine kinase [Source:HGNC Symbol;Acc:HGNC:12434]	0.000199801	0.489715	0.131	0.071	1	Naive T	All other cells	ND1_7.Neftel_2019_10x Lymphocytes	0.472925	0.251089	0.1	1000
EMC4	ER membrane protein complex subunit 4 [Source:HGNC Symbol;Acc:HGNC:28032]	0.000200011	-0.46105	0.161	0.279	1	Naive T	All other cells	ND1_7.Neftel_2019_10x Lymphocytes	0.566271	0.956531	0.1	1000
TMEM59	transmembrane protein 59 [Source:HGNC Symbol;Acc:HGNC:1239]	0.000200772	-0.278532	0.436	0.562	1	Naive T	All other cells	ND1_7.Neftel_2019_10x Lymphocytes	1.94187	2.59769	0.1	1000
CSK	C-terminal Src kinase [Source:HGNC Symbol;Acc:HGNC:2444]	0.000201649	-0.512967	0.14	0.229	1	Naive T	All other cells	ND1_7.Neftel_2019_10x Lymphocytes	0.436608	0.796264	0.1	1000
HDAC1	histone deacetylase 1 [Source:HGNC Symbol;Acc:HGNC:4852]	0.000202023	-0.414851	0.152	0.248	1	Naive T	All other cells	ND1_7.Neftel_2019_10x Lymphocytes	0.547697	0.880708	0.1	1000
PIK3R1	phosphoinositide-3-kinase regulatory subunit 1 [Source:HGNC Symbol;Acc:HGNC:8979]	0.000202708	-0.287745	0.239	0.342	1	Naive T	All other cells	ND1_7.Neftel_2019_10x Lymphocytes	1.16857	1.59153	0.1	1000
MRPL18	mitochondrial ribosomal protein L18 [Source:HGNC Symbol;Acc:HGNC:14477]	0.00020312	-0.259986	0.134	0.221	1	Naive T	All other cells	ND1_7.Neftel_2019_10x Lymphocytes	0.561902	0.758429	0.1	1000
POLR2F	RNA polymerase II, I and III subunit F [Source:HGNC Symbol;Acc:HGNC:9193]	0.000203262	-0.398901	0.167	0.288	1	Naive T	All other cells	ND1_7.Neftel_2019_10x Lymphocytes	0.633475	0.993015	0.1	1000
TNFSF8	TNF superfamily member 8 [Source:HGNC Symbol;Acc:HGNC:11938]	0.000205113	0.686893	0.14	0.07	1	Naive T	All other cells	ND1_7.Neftel_2019_10x Lymphocytes	0.602736	0.253573	0.1	1000
RAB11B	RAB11B, member RAS oncogene family [Source:HGNC Symbol;Acc:HGNC:9761]	0.000205356	-0.518843	0.152	0.243	1	Naive T	All other cells	ND1_7.Neftel_2019_10x Lymphocytes	0.498536	0.90559	0.1	1000
EIF4G1	eukaryotic translation initiation factor 4 gamma 1 [Source:HGNC Symbol;Acc:HGNC:3296]	0.000207819	-0.614253	0.054	0.124	1	Naive T	All other cells	ND1_7.Neftel_2019_10x Lymphocytes	0.163036	0.386163	0.1	1000
MCRS1	microspherule protein 1 [Source:HGNC Symbol;Acc:HGNC:6960]	0.00020876	-0.514713	0.063	0.125	1	Naive T	All other cells	ND1_7.Neftel_2019_10x Lymphocytes	0.195217	0.393944	0.1	1000
HADHB	hydroxyacyl-CoA dehydrogenase trifunctional multienzyme complex subunit beta [Source:HGNC Symbol;Acc:HGNC:4803]	0.000209302	-0.494886	0.087	0.173	1	Naive T	All other cells	ND1_7.Neftel_2019_10x Lymphocytes	0.28751	0.535637	0.1	1000
ITPA	inosine triphosphatase [Source:HGNC Symbol;Acc:HGNC:6176]	0.000210669	-0.532519	0.09	0.173	1	Naive T	All other cells	ND1_7.Neftel_2019_10x Lymphocytes	0.282557	0.551578	0.1	1000
EIF4H	eukaryotic translation initiation factor 4H [Source:HGNC Symbol;Acc:HGNC:12741]	0.000211679	-0.387413	0.194	0.294	1	Naive T	All other cells	ND1_7.Neftel_2019_10x Lymphocytes	0.676812	1.04437	0.1	1000
FAM104A	family with sequence similarity 104 member A [Source:HGNC Symbol;Acc:HGNC:25918]	0.000213219	-0.529173	0.063	0.136	1	Naive T	All other cells	ND1_7.Neftel_2019_10x Lymphocytes	0.227344	0.455676	0.1	1000
S1PR4	sphingosine-1-phosphate receptor 4 [Source:HGNC Symbol;Acc:HGNC:3170]	0.000215555	0.388709	0.328	0.23	1	Naive T	All other cells	ND1_7.Neftel_2019_10x Lymphocytes	1.26487	0.825288	0.1	1000
CHMP1A	charged multivesicular body protein 1A [Source:HGNC Symbol;Acc:HGNC:8740]	0.00021798	-0.6272	0.057	0.138	1	Naive T	All other cells	ND1_7.Neftel_2019_10x Lymphocytes	0.179734	0.423762	0.1	1000
HLA-F	major histocompatibility complex, class I, F [Source:HGNC Symbol;Acc:HGNC:4963]	0.000218077	-0.299328	0.457	0.555	1	Naive T	All other cells	ND1_7.Neftel_2019_10x Lymphocytes	1.97515	2.69928	0.1	1000
MIDN	midnolin [Source:HGNC Symbol;Acc:HGNC:16298]	0.000219569	-0.728025	0.036	0.101	1	Naive T	All other cells	ND1_7.Neftel_2019_10x Lymphocytes	0.100606	0.315453	0.1	1000
SELPLG	selectin P ligand [Source:HGNC Symbol;Acc:HGNC:10722]	0.000222341	-0.440203	0.212	0.31	1	Naive T	All other cells	ND1_7.Neftel_2019_10x Lymphocytes	0.778281	1.26399	0.1	1000
POLD4	DNA polymerase delta 4, accessory subunit [Source:HGNC Symbol;Acc:HGNC:14106]	0.000224841	-0.583506	0.075	0.146	1	Naive T	All other cells	ND1_7.Neftel_2019_10x Lymphocytes	0.263977	0.55236	0.1	1000
TXNDC17	thioredoxin domain containing 17 [Source:HGNC Symbol;Acc:HGNC:28218]	0.000225262	-0.46882	0.14	0.248	1	Naive T	All other cells	ND1_7.Neftel_2019_10x Lymphocytes	0.499568	0.858174	0.1	1000
TIMM17A	translocase of inner mitochondrial membrane 17A [Source:HGNC Symbol;Acc:HGNC:17315]	0.000225805	-0.452745	0.081	0.152	1	Naive T	All other cells	ND1_7.Neftel_2019_10x Lymphocytes	0.278664	0.495496	0.1	1000
PPM1G	protein phosphatase, Mg2+/Mn2+ dependent 1G [Source:HGNC Symbol;Acc:HGNC:9278]	0.000229453	-0.345001	0.215	0.326	1	Naive T	All other cells	ND1_7.Neftel_2019_10x Lymphocytes	0.837852	1.22424	0.1	1000
SRSF4	serine and arginine rich splicing factor 4 [Source:HGNC Symbol;Acc:HGNC:10786]	0.000232351	-0.446007	0.149	0.26	1	Naive T	All other cells	ND1_7.Neftel_2019_10x Lymphocytes	0.535571	0.892801	0.1	1000
AUP1	AUP1 lipid droplet regulating VLDL assembly factor [Source:HGNC Symbol;Acc:HGNC:891]	0.00023333	-0.375506	0.173	0.271	1	Naive T	All other cells	ND1_7.Neftel_2019_10x Lymphocytes	0.61174	0.9361	0.1	1000
MRPL27	mitochondrial ribosomal protein L27 [Source:HGNC Symbol;Acc:HGNC:14483]	0.000237165	-0.377671	0.09	0.174	1	Naive T	All other cells	ND1_7.Neftel_2019_10x Lymphocytes	0.347941	0.553493	0.1	1000
LPXN	leupaxin [Source:HGNC Symbol;Acc:HGNC:14061]	0.000239546	-0.344951	0.179	0.284	1	Naive T	All other cells	ND1_7.Neftel_2019_10x Lymphocytes	0.686251	1.01012	0.1	1000
NELFCD	negative elongation factor complex member C/D [Source:HGNC Symbol;Acc:HGNC:15934]	0.000241237	-0.485174	0.096	0.179	1	Naive T	All other cells	ND1_7.Neftel_2019_10x Lymphocytes	0.333911	0.604869	0.1	1000
NRBF2	nuclear receptor binding factor 2 [Source:HGNC Symbol;Acc:HGNC:19692]	0.000243577	-0.519513	0.066	0.13	1	Naive T	All other cells	ND1_7.Neftel_2019_10x Lymphocytes	0.20582	0.414147	0.1	1000
EZR	ezrin [Source:HGNC Symbol;Acc:HGNC:12691]	0.000246661	-0.290897	0.296	0.391	1	Naive T	All other cells	ND1_7.Neftel_2019_10x Lymphocytes	1.17091	1.6	0.1	1000
TMUB1	transmembrane and ubiquitin like domain containing 1 [Source:HGNC Symbol;Acc:HGNC:21709]	0.000248531	-0.51776	0.11	0.205	1	Naive T	All other cells	ND1_7.Neftel_2019_10x Lymphocytes	0.372811	0.693502	0.1	1000
ATF4	activating transcription factor 4 [Source:HGNC Symbol;Acc:HGNC:786]	0.000251245	-0.438786	0.158	0.279	1	Naive T	All other cells	ND1_7.Neftel_2019_10x Lymphocytes	0.614314	1.00778	0.1	1000
TANK	TRAF family member associated NFKB activator [Source:HGNC Symbol;Acc:HGNC:11562]	0.000252841	-0.445826	0.185	0.297	1	Naive T	All other cells	ND1_7.Neftel_2019_10x Lymphocytes	0.669519	1.10182	0.1	1000
DCUN1D5	defective in cullin neddylation 1 domain containing 5 [Source:HGNC Symbol;Acc:HGNC:28409]	0.00025541	-0.682332	0.054	0.133	1	Naive T	All other cells	ND1_7.Neftel_2019_10x Lymphocytes	0.161459	0.417293	0.1	1000
TMEM258	transmembrane protein 258 [Source:HGNC Symbol;Acc:HGNC:1164]	0.000255466	-0.294829	0.451	0.573	1	Naive T	All other cells	ND1_7.Neftel_2019_10x Lymphocytes	2.00438	2.72597	0.1	1000
ZBP1	Z-DNA binding protein 1 [Source:HGNC Symbol;Acc:HGNC:16176]	0.000256462	-0.626668	0.051	0.117	1	Naive T	All other cells	ND1_7.Neftel_2019_10x Lymphocytes	0.166738	0.399165	0.1	1000
STOM	stomatin [Source:HGNC Symbol;Acc:HGNC:3383]	0.000256859	-0.407224	0.116	0.198	1	Naive T	All other cells	ND1_7.Neftel_2019_10x Lymphocytes	0.448598	0.724345	0.1	1000
CDC37	cell division cycle 37, HSP90 cochaperone [Source:HGNC Symbol;Acc:HGNC:1735]	0.000257069	-0.257138	0.334	0.467	1	Naive T	All other cells	ND1_7.Neftel_2019_10x Lymphocytes	1.48367	1.94804	0.1	1000
MRPS35	mitochondrial ribosomal protein S35 [Source:HGNC Symbol;Acc:HGNC:16635]	0.00026045	-0.406762	0.069	0.128	1	Naive T	All other cells	ND1_7.Neftel_2019_10x Lymphocytes	0.220704	0.38168	0.1	1000
LYPLA1	lysophospholipase 1 [Source:HGNC Symbol;Acc:HGNC:6737]	0.000260871	-0.264386	0.101	0.171	1	Naive T	All other cells	ND1_7.Neftel_2019_10x Lymphocytes	0.395889	0.545961	0.1	1000
RAP1B	RAP1B, member of RAS oncogene family [Source:HGNC Symbol;Acc:HGNC:9857]	0.000266504	-0.306469	0.251	0.36	1	Naive T	All other cells	ND1_7.Neftel_2019_10x Lymphocytes	1.19606	1.66085	0.1	1000
SMPD1	sphingomyelin phosphodiesterase 1 [Source:HGNC Symbol;Acc:HGNC:11120]	0.000267784	-0.711937	0.036	0.103	1	Naive T	All other cells	ND1_7.Neftel_2019_10x Lymphocytes	0.109048	0.326026	0.1	1000
CEBPD	CCAAT enhancer binding protein delta [Source:HGNC Symbol;Acc:HGNC:1835]	0.000268567	-0.697449	0.107	0.2	1	Naive T	All other cells	ND1_7.Neftel_2019_10x Lymphocytes	0.370921	0.845902	0.1	1000
BCL2L1	BCL2 like 1 [Source:HGNC Symbol;Acc:HGNC:992]	0.000273635	-0.532504	0.06	0.145	1	Naive T	All other cells	ND1_7.Neftel_2019_10x Lymphocytes	0.249484	0.495239	0.1	1000
CSNK1A1	casein kinase 1 alpha 1 [Source:HGNC Symbol;Acc:HGNC:2451]	0.0002759	-0.437324	0.185	0.278	1	Naive T	All other cells	ND1_7.Neftel_2019_10x Lymphocytes	0.612345	1.00311	0.1	1000
PCID2	PCI domain containing 2 [Source:HGNC Symbol;Acc:HGNC:25653]	0.000282314	-0.600474	0.06	0.136	1	Naive T	All other cells	ND1_7.Neftel_2019_10x Lymphocytes	0.193638	0.435297	0.1	1000
PCSK7	proprotein convertase subtilisin/kexin type 7 [Source:HGNC Symbol;Acc:HGNC:8748]	0.000288186	-0.451484	0.146	0.241	1	Naive T	All other cells	ND1_7.Neftel_2019_10x Lymphocytes	0.533109	0.894387	0.1	1000
SLAMF1	signaling lymphocytic activation molecule family member 1 [Source:HGNC Symbol;Acc:HGNC:10903]	0.000289524	-0.520956	0.078	0.16	1	Naive T	All other cells	ND1_7.Neftel_2019_10x Lymphocytes	0.325002	0.615548	0.1	1000
SS18L2	SS18 like 2 [Source:HGNC Symbol;Acc:HGNC:15593]	0.000292534	-0.327089	0.242	0.335	1	Naive T	All other cells	ND1_7.Neftel_2019_10x Lymphocytes	0.850264	1.21795	0.1	1000
CNN2	calponin 2 [Source:HGNC Symbol;Acc:HGNC:2156]	0.000293879	-0.388204	0.325	0.433	1	Naive T	All other cells	ND1_7.Neftel_2019_10x Lymphocytes	1.4398	2.17018	0.1	1000
MOSPD3	motile sperm domain containing 3 [Source:HGNC Symbol;Acc:HGNC:25078]	0.000294334	-0.528954	0.081	0.158	1	Naive T	All other cells	ND1_7.Neftel_2019_10x Lymphocytes	0.250366	0.494627	0.1	1000
AKR1A1	aldo-keto reductase family 1 member A1 [Source:HGNC Symbol;Acc:HGNC:380]	0.00029707	-0.472706	0.107	0.2	1	Naive T	All other cells	ND1_7.Neftel_2019_10x Lymphocytes	0.358912	0.636247	0.1	1000
ARPC1B	actin related protein 2/3 complex subunit 1B [Source:HGNC Symbol;Acc:HGNC:704]	0.000299435	-0.344564	0.642	0.677	1	Naive T	All other cells	ND1_7.Neftel_2019_10x Lymphocytes	3.672	5.2237	0.1	1000
DNAJB6	DnaJ heat shock protein family (Hsp40) member B6 [Source:HGNC Symbol;Acc:HGNC:14888]	0.000302507	-0.396418	0.284	0.413	1	Naive T	All other cells	ND1_7.Neftel_2019_10x Lymphocytes	1.16614	1.7821	0.1	1000
GBP2	guanylate binding protein 2 [Source:HGNC Symbol;Acc:HGNC:4183]	0.000303613	-0.412996	0.164	0.259	1	Naive T	All other cells	ND1_7.Neftel_2019_10x Lymphocytes	0.646404	1.02807	0.1	1000
FAAP20	FA core complex associated protein 20 [Source:HGNC Symbol;Acc:HGNC:26428]	0.000303848	-0.280011	0.188	0.281	1	Naive T	All other cells	ND1_7.Neftel_2019_10x Lymphocytes	0.753701	1.02957	0.1	1000
LAGE3	L antigen family member 3 [Source:HGNC Symbol;Acc:HGNC:26058]	0.000304726	-0.383011	0.122	0.211	1	Naive T	All other cells	ND1_7.Neftel_2019_10x Lymphocytes	0.426833	0.672704	0.1	1000
STK17B	serine/threonine kinase 17b [Source:HGNC Symbol;Acc:HGNC:11396]	0.000313895	-0.2932	0.439	0.543	1	Naive T	All other cells	ND1_7.Neftel_2019_10x Lymphocytes	2.11414	2.86852	0.1	1000
CYC1	cytochrome c1 [Source:HGNC Symbol;Acc:HGNC:2579]	0.000315944	-0.419735	0.14	0.228	1	Naive T	All other cells	ND1_7.Neftel_2019_10x Lymphocytes	0.463916	0.758031	0.1	1000
NMI	N-myc and STAT interactor [Source:HGNC Symbol;Acc:HGNC:7854]	0.000322444	-0.411561	0.104	0.192	1	Naive T	All other cells	ND1_7.Neftel_2019_10x Lymphocytes	0.385734	0.633056	0.1	1000
KDSR	3-ketodihydrosphingosine reductase [Source:HGNC Symbol;Acc:HGNC:4021]	0.000324517	0.477506	0.131	0.075	1	Naive T	All other cells	ND1_7.Neftel_2019_10x Lymphocytes	0.442835	0.236736	0.1	1000
AKR1B1	aldo-keto reductase family 1 member B [Source:HGNC Symbol;Acc:HGNC:381]	0.000333241	-0.405925	0.149	0.241	1	Naive T	All other cells	ND1_7.Neftel_2019_10x Lymphocytes	0.525639	0.83889	0.1	1000
TOX4	TOX high mobility group box family member 4 [Source:HGNC Symbol;Acc:HGNC:20161]	0.000337085	-0.390328	0.096	0.163	1	Naive T	All other cells	ND1_7.Neftel_2019_10x Lymphocytes	0.32137	0.52256	0.1	1000
ACAP2	ArfGAP with coiled-coil, ankyrin repeat and PH domains 2 [Source:HGNC Symbol;Acc:HGNC:16469]	0.000337656	-0.530294	0.09	0.163	1	Naive T	All other cells	ND1_7.Neftel_2019_10x Lymphocytes	0.298166	0.576656	0.1	1000
NCK1	NCK adaptor protein 1 [Source:HGNC Symbol;Acc:HGNC:7664]	0.00033849	-0.523855	0.084	0.154	1	Naive T	All other cells	ND1_7.Neftel_2019_10x Lymphocytes	0.254958	0.499356	0.1	1000
PSMC4	proteasome 26S subunit, ATPase 4 [Source:HGNC Symbol;Acc:HGNC:9551]	0.000338672	-0.390958	0.164	0.255	1	Naive T	All other cells	ND1_7.Neftel_2019_10x Lymphocytes	0.558059	0.872872	0.1	1000
COMT	catechol-O-methyltransferase [Source:HGNC Symbol;Acc:HGNC:2228]	0.000339824	-0.496322	0.113	0.2	1	Naive T	All other cells	ND1_7.Neftel_2019_10x Lymphocytes	0.37235	0.675914	0.1	1000
SLC7A5	solute carrier family 7 member 5 [Source:HGNC Symbol;Acc:HGNC:11063]	0.00034442	-0.561629	0.057	0.138	1	Naive T	All other cells	ND1_7.Neftel_2019_10x Lymphocytes	0.240257	0.496649	0.1	1000
EIF2AK2	eukaryotic translation initiation factor 2 alpha kinase 2 [Source:HGNC Symbol;Acc:HGNC:9437]	0.000345763	-0.550799	0.107	0.194	1	Naive T	All other cells	ND1_7.Neftel_2019_10x Lymphocytes	0.383218	0.738208	0.1	1000
CDK2AP2	cyclin dependent kinase 2 associated protein 2 [Source:HGNC Symbol;Acc:HGNC:30833]	0.000348621	-0.482545	0.2	0.306	1	Naive T	All other cells	ND1_7.Neftel_2019_10x Lymphocytes	0.694187	1.18674	0.1	1000
LMAN1	lectin, mannose binding 1 [Source:HGNC Symbol;Acc:HGNC:6631]	0.00035359	-0.437391	0.09	0.169	1	Naive T	All other cells	ND1_7.Neftel_2019_10x Lymphocytes	0.312514	0.538845	0.1	1000
BRMS1	BRMS1 transcriptional repressor and anoikis regulator [Source:HGNC Symbol;Acc:HGNC:17262]	0.00035406	-0.383594	0.084	0.158	1	Naive T	All other cells	ND1_7.Neftel_2019_10x Lymphocytes	0.318458	0.514109	0.1	1000
MT1X	metallothionein 1X [Source:HGNC Symbol;Acc:HGNC:7405]	0.000363625	1.05051	0.197	0.302	1	Naive T	All other cells	ND1_7.Neftel_2019_10x Lymphocytes	5.2674	1.7773	0.1	1000
SYNRG	synergin gamma [Source:HGNC Symbol;Acc:HGNC:557]	0.000364422	-0.348416	0.146	0.219	1	Naive T	All other cells	ND1_7.Neftel_2019_10x Lymphocytes	0.497729	0.746875	0.1	1000
HNRNPR	heterogeneous nuclear ribonucleoprotein R [Source:HGNC Symbol;Acc:HGNC:5047]	0.000365772	-0.425534	0.221	0.33	1	Naive T	All other cells	ND1_7.Neftel_2019_10x Lymphocytes	0.791267	1.264	0.1	1000
ATP6V0E1	ATPase H+ transporting V0 subunit e1 [Source:HGNC Symbol;Acc:HGNC:863]	0.000367266	-0.264366	0.558	0.67	1	Naive T	All other cells	ND1_7.Neftel_2019_10x Lymphocytes	2.78102	3.65283	0.1	1000
SRRT	serrate, RNA effector molecule [Source:HGNC Symbol;Acc:HGNC:24101]	0.000369079	-0.601867	0.084	0.173	1	Naive T	All other cells	ND1_7.Neftel_2019_10x Lymphocytes	0.315867	0.659176	0.1	1000
MTDH	metadherin [Source:HGNC Symbol;Acc:HGNC:29608]	0.000369743	-0.28102	0.367	0.476	1	Naive T	All other cells	ND1_7.Neftel_2019_10x Lymphocytes	1.48012	1.99283	0.1	1000
TRAPPC2L	trafficking protein particle complex 2 like [Source:HGNC Symbol;Acc:HGNC:30887]	0.000370043	-0.254351	0.179	0.27	1	Naive T	All other cells	ND1_7.Neftel_2019_10x Lymphocytes	0.704838	0.937938	0.1	1000
TACC1	transforming acidic coiled-coil containing protein 1 [Source:HGNC Symbol;Acc:HGNC:11522]	0.000372977	-0.493768	0.081	0.156	1	Naive T	All other cells	ND1_7.Neftel_2019_10x Lymphocytes	0.260634	0.490891	0.1	1000
AIP	aryl hydrocarbon receptor interacting protein [Source:HGNC Symbol;Acc:HGNC:358]	0.000373567	-0.293181	0.245	0.338	1	Naive T	All other cells	ND1_7.Neftel_2019_10x Lymphocytes	0.898767	1.23903	0.1	1000
RPA3	replication protein A3 [Source:HGNC Symbol;Acc:HGNC:10291]	0.000376304	-0.421127	0.194	0.284	1	Naive T	All other cells	ND1_7.Neftel_2019_10x Lymphocytes	0.651605	1.0452	0.1	1000
LAMP1	lysosomal associated membrane protein 1 [Source:HGNC Symbol;Acc:HGNC:6499]	0.000380807	-0.381575	0.158	0.252	1	Naive T	All other cells	ND1_7.Neftel_2019_10x Lymphocytes	0.555712	0.860349	0.1	1000
ECH1	enoyl-CoA hydratase 1 [Source:HGNC Symbol;Acc:HGNC:3149]	0.000382427	-0.28839	0.245	0.348	1	Naive T	All other cells	ND1_7.Neftel_2019_10x Lymphocytes	0.981309	1.34277	0.1	1000
SH3GLB1	SH3 domain containing GRB2 like, endophilin B1 [Source:HGNC Symbol;Acc:HGNC:10833]	0.000399893	-0.51501	0.131	0.226	1	Naive T	All other cells	ND1_7.Neftel_2019_10x Lymphocytes	0.408861	0.751657	0.1	1000
C4orf3	chromosome 4 open reading frame 3 [Source:HGNC Symbol;Acc:HGNC:19225]	0.000406453	-0.267989	0.496	0.6	1	Naive T	All other cells	ND1_7.Neftel_2019_10x Lymphocytes	2.21969	2.93261	0.1	1000
ELF1	E74 like ETS transcription factor 1 [Source:HGNC Symbol;Acc:HGNC:3316]	0.000421648	-0.325317	0.322	0.444	1	Naive T	All other cells	ND1_7.Neftel_2019_10x Lymphocytes	1.42603	2.01274	0.1	1000
ETNK1	ethanolamine kinase 1 [Source:HGNC Symbol;Acc:HGNC:24649]	0.000424126	-0.560521	0.069	0.139	1	Naive T	All other cells	ND1_7.Neftel_2019_10x Lymphocytes	0.228168	0.474814	0.1	1000
ATP2B4	ATPase plasma membrane Ca2+ transporting 4 [Source:HGNC Symbol;Acc:HGNC:817]	0.000430942	-0.511341	0.045	0.105	1	Naive T	All other cells	ND1_7.Neftel_2019_10x Lymphocytes	0.189276	0.382376	0.1	1000
HSPA4	heat shock protein family A (Hsp70) member 4 [Source:HGNC Symbol;Acc:HGNC:5237]	0.000434619	-0.486909	0.066	0.137	1	Naive T	All other cells	ND1_7.Neftel_2019_10x Lymphocytes	0.22879	0.435033	0.1	1000
UBA1	ubiquitin like modifier activating enzyme 1 [Source:HGNC Symbol;Acc:HGNC:12469]	0.000446582	-0.566128	0.057	0.116	1	Naive T	All other cells	ND1_7.Neftel_2019_10x Lymphocytes	0.150475	0.341196	0.1	1000
HSPE1	heat shock protein family E (Hsp10) member 1 [Source:HGNC Symbol;Acc:HGNC:5269]	0.00044985	-0.503664	0.496	0.553	1	Naive T	All other cells	ND1_7.Neftel_2019_10x Lymphocytes	2.64258	4.43835	0.1	1000
RBM33	RNA binding motif protein 33 [Source:HGNC Symbol;Acc:HGNC:27223]	0.000455839	-0.491142	0.051	0.111	1	Naive T	All other cells	ND1_7.Neftel_2019_10x Lymphocytes	0.188236	0.37103	0.1	1000
PFKP	phosphofructokinase, platelet [Source:HGNC Symbol;Acc:HGNC:8878]	0.000461979	-0.489904	0.066	0.139	1	Naive T	All other cells	ND1_7.Neftel_2019_10x Lymphocytes	0.223922	0.428693	0.1	1000
SSR3	signal sequence receptor subunit 3 [Source:HGNC Symbol;Acc:HGNC:11325]	0.000466719	-0.260442	0.212	0.312	1	Naive T	All other cells	ND1_7.Neftel_2019_10x Lymphocytes	0.855135	1.13929	0.1	1000
TNFRSF1A	TNF receptor superfamily member 1A [Source:HGNC Symbol;Acc:HGNC:11916]	0.000467686	-0.480505	0.069	0.139	1	Naive T	All other cells	ND1_7.Neftel_2019_10x Lymphocytes	0.253604	0.471739	0.1	1000
ODF2L	outer dense fiber of sperm tails 2 like [Source:HGNC Symbol;Acc:HGNC:29225]	0.000478144	0.333281	0.269	0.182	1	Naive T	All other cells	ND1_7.Neftel_2019_10x Lymphocytes	0.942031	0.646687	0.1	1000
SQSTM1	sequestosome 1 [Source:NCBI gene (formerly Entrezgene);Acc:8878]	0.000482861	-0.362343	0.221	0.329	1	Naive T	All other cells	ND1_7.Neftel_2019_10x Lymphocytes	0.968268	1.43477	0.1	1000
EIF3H	eukaryotic translation initiation factor 3 subunit H [Source:HGNC Symbol;Acc:HGNC:3273]	0.000483911	0.265149	0.654	0.607	1	Naive T	All other cells	ND1_7.Neftel_2019_10x Lymphocytes	3.86565	2.94202	0.1	1000
NRBP1	nuclear receptor binding protein 1 [Source:HGNC Symbol;Acc:HGNC:7993]	0.000484683	-0.339897	0.113	0.19	1	Naive T	All other cells	ND1_7.Neftel_2019_10x Lymphocytes	0.428253	0.642091	0.1	1000
AP2B1	adaptor related protein complex 2 subunit beta 1 [Source:HGNC Symbol;Acc:HGNC:563]	0.00048911	-0.622198	0.072	0.16	1	Naive T	All other cells	ND1_7.Neftel_2019_10x Lymphocytes	0.233499	0.521314	0.1	1000
NT5C3A	5'-nucleotidase, cytosolic IIIA [Source:HGNC Symbol;Acc:HGNC:17820]	0.000492924	-0.656749	0.107	0.199	1	Naive T	All other cells	ND1_7.Neftel_2019_10x Lymphocytes	0.39249	0.849773	0.1	1000
NDUFB10	NADH:ubiquinone oxidoreductase subunit B10 [Source:HGNC Symbol;Acc:HGNC:7696]	0.000497358	-0.308991	0.361	0.473	1	Naive T	All other cells	ND1_7.Neftel_2019_10x Lymphocytes	1.45258	2.01469	0.1	1000
CYB5R3	cytochrome b5 reductase 3 [Source:HGNC Symbol;Acc:HGNC:2873]	0.000501549	-0.394208	0.104	0.181	1	Naive T	All other cells	ND1_7.Neftel_2019_10x Lymphocytes	0.373024	0.601594	0.1	1000
CCND2	cyclin D2 [Source:HGNC Symbol;Acc:HGNC:1583]	0.000502953	-0.363581	0.152	0.26	1	Naive T	All other cells	ND1_7.Neftel_2019_10x Lymphocytes	0.646933	0.974441	0.1	1000
CHMP4A	charged multivesicular body protein 4A [Source:HGNC Symbol;Acc:HGNC:20274]	0.000509453	-0.415415	0.191	0.296	1	Naive T	All other cells	ND1_7.Neftel_2019_10x Lymphocytes	0.689199	1.09564	0.1	1000
SYAP1	synapse associated protein 1 [Source:HGNC Symbol;Acc:HGNC:16273]	0.000519741	-0.475297	0.116	0.202	1	Naive T	All other cells	ND1_7.Neftel_2019_10x Lymphocytes	0.418803	0.73449	0.1	1000
SDHB	succinate dehydrogenase complex iron sulfur subunit B [Source:HGNC Symbol;Acc:HGNC:10681]	0.000522524	-0.330293	0.122	0.196	1	Naive T	All other cells	ND1_7.Neftel_2019_10x Lymphocytes	0.411653	0.611902	0.1	1000
TOR3A	torsin family 3 member A [Source:HGNC Symbol;Acc:HGNC:11997]	0.000524362	-0.377252	0.063	0.112	1	Naive T	All other cells	ND1_7.Neftel_2019_10x Lymphocytes	0.185226	0.315936	0.1	1000
MRPL16	mitochondrial ribosomal protein L16 [Source:HGNC Symbol;Acc:HGNC:14476]	0.0005298	-0.419708	0.087	0.157	1	Naive T	All other cells	ND1_7.Neftel_2019_10x Lymphocytes	0.287781	0.490016	0.1	1000
AP1G2	adaptor related protein complex 1 subunit gamma 2 [Source:HGNC Symbol;Acc:HGNC:556]	0.000532079	-0.510916	0.069	0.127	1	Naive T	All other cells	ND1_7.Neftel_2019_10x Lymphocytes	0.211083	0.418519	0.1	1000
LMO4	LIM domain only 4 [Source:HGNC Symbol;Acc:HGNC:6644]	0.000533951	-0.479788	0.054	0.123	1	Naive T	All other cells	ND1_7.Neftel_2019_10x Lymphocytes	0.235041	0.441337	0.1	1000
PRKAR2A	protein kinase cAMP-dependent type II regulatory subunit alpha [Source:HGNC Symbol;Acc:HGNC:9391]	0.000535041	-0.510978	0.051	0.107	1	Naive T	All other cells	ND1_7.Neftel_2019_10x Lymphocytes	0.174852	0.358157	0.1	1000
SHKBP1	SH3KBP1 binding protein 1 [Source:HGNC Symbol;Acc:HGNC:19214]	0.000538244	-0.42799	0.131	0.223	1	Naive T	All other cells	ND1_7.Neftel_2019_10x Lymphocytes	0.432718	0.71728	0.1	1000
DCTN2	dynactin subunit 2 [Source:HGNC Symbol;Acc:HGNC:2712]	0.000540142	-0.351076	0.14	0.223	1	Naive T	All other cells	ND1_7.Neftel_2019_10x Lymphocytes	0.485668	0.731997	0.1	1000
ATP6V1F	ATPase H+ transporting V1 subunit F [Source:HGNC Symbol;Acc:HGNC:16832]	0.00054328	-0.344759	0.394	0.496	1	Naive T	All other cells	ND1_7.Neftel_2019_10x Lymphocytes	1.45664	2.09743	0.1	1000
IK	IK cytokine [Source:HGNC Symbol;Acc:HGNC:5958]	0.000543956	-0.32126	0.215	0.314	1	Naive T	All other cells	ND1_7.Neftel_2019_10x Lymphocytes	0.790335	1.12765	0.1	1000
MDH1	malate dehydrogenase 1 [Source:HGNC Symbol;Acc:HGNC:6970]	0.000560471	-0.32923	0.215	0.307	1	Naive T	All other cells	ND1_7.Neftel_2019_10x Lymphocytes	0.752589	1.08501	0.1	1000
SMARCB1	SWI/SNF related, matrix associated, actin dependent regulator of chromatin, subfamily b, member 1 [Source:HGNC Symbol;Acc:HGNC:11103]	0.000561211	-0.342958	0.104	0.179	1	Naive T	All other cells	ND1_7.Neftel_2019_10x Lymphocytes	0.355959	0.542497	0.1	1000
CFLAR	CASP8 and FADD like apoptosis regulator [Source:HGNC Symbol;Acc:HGNC:1876]	0.000561906	-0.320907	0.224	0.322	1	Naive T	All other cells	ND1_7.Neftel_2019_10x Lymphocytes	0.866498	1.2322	0.1	1000
NUDT22	nudix hydrolase 22 [Source:HGNC Symbol;Acc:HGNC:28189]	0.000563131	-0.497994	0.069	0.146	1	Naive T	All other cells	ND1_7.Neftel_2019_10x Lymphocytes	0.252627	0.480218	0.1	1000
GUSB	glucuronidase beta [Source:HGNC Symbol;Acc:HGNC:4696]	0.000565699	-0.453932	0.051	0.115	1	Naive T	All other cells	ND1_7.Neftel_2019_10x Lymphocytes	0.175979	0.334526	0.1	1000
ZCRB1	zinc finger CCHC-type and RNA binding motif containing 1 [Source:HGNC Symbol;Acc:HGNC:29620]	0.00057076	-0.369067	0.149	0.238	1	Naive T	All other cells	ND1_7.Neftel_2019_10x Lymphocytes	0.530169	0.811467	0.1	1000
HDAC2	histone deacetylase 2 [Source:HGNC Symbol;Acc:HGNC:4853]	0.000577863	-0.47586	0.066	0.125	1	Naive T	All other cells	ND1_7.Neftel_2019_10x Lymphocytes	0.200471	0.383578	0.1	1000
MRPL14	mitochondrial ribosomal protein L14 [Source:HGNC Symbol;Acc:HGNC:14279]	0.000578645	-0.314115	0.167	0.238	1	Naive T	All other cells	ND1_7.Neftel_2019_10x Lymphocytes	0.543399	0.780843	0.1	1000
AP1S1	adaptor related protein complex 1 subunit sigma 1 [Source:HGNC Symbol;Acc:HGNC:559]	0.000579419	-0.744157	0.066	0.147	1	Naive T	All other cells	ND1_7.Neftel_2019_10x Lymphocytes	0.210575	0.553656	0.1	1000
RAB1B	RAB1B, member RAS oncogene family [Source:HGNC Symbol;Acc:HGNC:18370]	0.000581146	-0.434819	0.099	0.188	1	Naive T	All other cells	ND1_7.Neftel_2019_10x Lymphocytes	0.393953	0.663001	0.1	1000
NRDC	nardilysin convertase [Source:HGNC Symbol;Acc:HGNC:7995]	0.000584124	-0.442326	0.093	0.157	1	Naive T	All other cells	ND1_7.Neftel_2019_10x Lymphocytes	0.312992	0.542748	0.1	1000
YTHDC1	YTH domain containing 1 [Source:HGNC Symbol;Acc:HGNC:30626]	0.000585977	-0.285813	0.116	0.185	1	Naive T	All other cells	ND1_7.Neftel_2019_10x Lymphocytes	0.452627	0.63546	0.1	1000
DDX17	DEAD-box helicase 17 [Source:HGNC Symbol;Acc:HGNC:2740]	0.000588785	-0.358674	0.251	0.345	1	Naive T	All other cells	ND1_7.Neftel_2019_10x Lymphocytes	0.947997	1.40014	0.1	1000
ENSA	endosulfine alpha [Source:HGNC Symbol;Acc:HGNC:3360]	0.00059256	-0.334885	0.31	0.431	1	Naive T	All other cells	ND1_7.Neftel_2019_10x Lymphocytes	1.22267	1.7488	0.1	1000
RPA2	replication protein A2 [Source:HGNC Symbol;Acc:HGNC:10290]	0.000592969	-0.276822	0.161	0.244	1	Naive T	All other cells	ND1_7.Neftel_2019_10x Lymphocytes	0.601329	0.825005	0.1	1000
MPC1	mitochondrial pyruvate carrier 1 [Source:HGNC Symbol;Acc:HGNC:21606]	0.00060432	-0.498537	0.128	0.219	1	Naive T	All other cells	ND1_7.Neftel_2019_10x Lymphocytes	0.423762	0.762275	0.1	1000
COA3	cytochrome c oxidase assembly factor 3 [Source:HGNC Symbol;Acc:HGNC:24990]	0.000616914	-0.348081	0.09	0.176	1	Naive T	All other cells	ND1_7.Neftel_2019_10x Lymphocytes	0.360121	0.55169	0.1	1000
CCL3	C-C motif chemokine ligand 3 [Source:HGNC Symbol;Acc:HGNC:10627]	0.000618761	-1.00891	0.43	0.482	1	Naive T	All other cells	ND1_7.Neftel_2019_10x Lymphocytes	1.88289	5.3383	0.1	1000
HLA-DMB	major histocompatibility complex, class II, DM beta [Source:HGNC Symbol;Acc:HGNC:4935]	0.000620526	-0.520438	0.093	0.161	1	Naive T	All other cells	ND1_7.Neftel_2019_10x Lymphocytes	0.288423	0.553624	0.1	1000
EPB41L4A-AS1	EPB41L4A antisense RNA 1 [Source:HGNC Symbol;Acc:HGNC:30749]	0.00062364	0.382976	0.233	0.157	1	Naive T	All other cells	ND1_7.Neftel_2019_10x Lymphocytes	0.820495	0.52762	0.1	1000
ZBTB38	zinc finger and BTB domain containing 38 [Source:HGNC Symbol;Acc:HGNC:26636]	0.000624868	-0.422381	0.119	0.194	1	Naive T	All other cells	ND1_7.Neftel_2019_10x Lymphocytes	0.437904	0.72062	0.1	1000
POLR2J	RNA polymerase II subunit J [Source:HGNC Symbol;Acc:HGNC:9197]	0.000629185	-0.375144	0.23	0.326	1	Naive T	All other cells	ND1_7.Neftel_2019_10x Lymphocytes	0.784947	1.18778	0.1	1000
CCAR1	cell division cycle and apoptosis regulator 1 [Source:HGNC Symbol;Acc:HGNC:24236]	0.00063136	-0.423574	0.081	0.146	1	Naive T	All other cells	ND1_7.Neftel_2019_10x Lymphocytes	0.27975	0.480034	0.1	1000
TSPAN5	tetraspanin 5 [Source:HGNC Symbol;Acc:HGNC:17753]	0.000641302	-0.559277	0.051	0.123	1	Naive T	All other cells	ND1_7.Neftel_2019_10x Lymphocytes	0.178084	0.386482	0.1	1000
HNRNPK	heterogeneous nuclear ribonucleoprotein K [Source:HGNC Symbol;Acc:HGNC:5044]	0.000643201	-0.263433	0.591	0.661	1	Naive T	All other cells	ND1_7.Neftel_2019_10x Lymphocytes	2.72929	3.58201	0.1	1000
LPIN1	lipin 1 [Source:HGNC Symbol;Acc:HGNC:13345]	0.000643464	-0.3214	0.084	0.151	1	Naive T	All other cells	ND1_7.Neftel_2019_10x Lymphocytes	0.353337	0.525178	0.1	1000
CENPC	centromere protein C [Source:HGNC Symbol;Acc:HGNC:1854]	0.000649784	-0.569383	0.063	0.133	1	Naive T	All other cells	ND1_7.Neftel_2019_10x Lymphocytes	0.210702	0.449065	0.1	1000
NUTF2	nuclear transport factor 2 [Source:HGNC Symbol;Acc:HGNC:13722]	0.000650389	-0.348303	0.176	0.263	1	Naive T	All other cells	ND1_7.Neftel_2019_10x Lymphocytes	0.601065	0.893171	0.1	1000
FLNA	filamin A [Source:HGNC Symbol;Acc:HGNC:3754]	0.000651283	-0.406668	0.188	0.291	1	Naive T	All other cells	ND1_7.Neftel_2019_10x Lymphocytes	0.736469	1.15621	0.1	1000
RAD23B	RAD23 homolog B, nucleotide excision repair protein [Source:HGNC Symbol;Acc:HGNC:9813]	0.000652265	-0.523166	0.063	0.13	1	Naive T	All other cells	ND1_7.Neftel_2019_10x Lymphocytes	0.198077	0.402963	0.1	1000
LASP1	LIM and SH3 protein 1 [Source:HGNC Symbol;Acc:HGNC:6513]	0.000659179	-0.403813	0.072	0.15	1	Naive T	All other cells	ND1_7.Neftel_2019_10x Lymphocytes	0.287191	0.479828	0.1	1000
PHYKPL	5-phosphohydroxy-L-lysine phospho-lyase [Source:HGNC Symbol;Acc:HGNC:28249]	0.000670133	-0.40231	0.099	0.159	1	Naive T	All other cells	ND1_7.Neftel_2019_10x Lymphocytes	0.32756	0.539319	0.1	1000
ARL1	ADP ribosylation factor like GTPase 1 [Source:HGNC Symbol;Acc:HGNC:692]	0.000672562	-0.462473	0.048	0.106	1	Naive T	All other cells	ND1_7.Neftel_2019_10x Lymphocytes	0.183348	0.349955	0.1	1000
XAB2	XPA binding protein 2 [Source:HGNC Symbol;Acc:HGNC:14089]	0.000672923	-0.565145	0.054	0.108	1	Naive T	All other cells	ND1_7.Neftel_2019_10x Lymphocytes	0.16087	0.359053	0.1	1000
COPS6	COP9 signalosome subunit 6 [Source:HGNC Symbol;Acc:HGNC:21749]	0.000678074	-0.293093	0.209	0.297	1	Naive T	All other cells	ND1_7.Neftel_2019_10x Lymphocytes	0.740872	1.02725	0.1	1000
EIF2S1	eukaryotic translation initiation factor 2 subunit alpha [Source:HGNC Symbol;Acc:HGNC:3265]	0.000679227	-0.531122	0.069	0.144	1	Naive T	All other cells	ND1_7.Neftel_2019_10x Lymphocytes	0.215459	0.436544	0.1	1000
CDV3	CDV3 homolog [Source:HGNC Symbol;Acc:HGNC:26928]	0.000680304	-0.510325	0.063	0.119	1	Naive T	All other cells	ND1_7.Neftel_2019_10x Lymphocytes	0.189099	0.381591	0.1	1000
RNF114	ring finger protein 114 [Source:HGNC Symbol;Acc:HGNC:13094]	0.000683844	-0.358212	0.104	0.186	1	Naive T	All other cells	ND1_7.Neftel_2019_10x Lymphocytes	0.409347	0.628758	0.1	1000
FBXW2	F-box and WD repeat domain containing 2 [Source:HGNC Symbol;Acc:HGNC:13608]	0.000684139	-0.435602	0.054	0.111	1	Naive T	All other cells	ND1_7.Neftel_2019_10x Lymphocytes	0.185395	0.341191	0.1	1000
AMZ2	archaelysin family metallopeptidase 2 [Source:HGNC Symbol;Acc:HGNC:28041]	0.000689804	-0.540081	0.096	0.169	1	Naive T	All other cells	ND1_7.Neftel_2019_10x Lymphocytes	0.300906	0.588013	0.1	1000
PDLIM2	PDZ and LIM domain 2 [Source:HGNC Symbol;Acc:HGNC:13992]	0.000697392	-0.372051	0.167	0.263	1	Naive T	All other cells	ND1_7.Neftel_2019_10x Lymphocytes	0.610825	0.931199	0.1	1000
MRPL37	mitochondrial ribosomal protein L37 [Source:HGNC Symbol;Acc:HGNC:14034]	0.000704803	-0.579532	0.06	0.135	1	Naive T	All other cells	ND1_7.Neftel_2019_10x Lymphocytes	0.190808	0.419152	0.1	1000
PEF1	penta-EF-hand domain containing 1 [Source:HGNC Symbol;Acc:HGNC:30009]	0.000706953	-0.468384	0.087	0.168	1	Naive T	All other cells	ND1_7.Neftel_2019_10x Lymphocytes	0.304346	0.545906	0.1	1000
SNRPD1	small nuclear ribonucleoprotein D1 polypeptide [Source:HGNC Symbol;Acc:HGNC:11158]	0.000716243	-0.3348	0.296	0.395	1	Naive T	All other cells	ND1_7.Neftel_2019_10x Lymphocytes	1.09973	1.57681	0.1	1000
FBXO7	F-box protein 7 [Source:HGNC Symbol;Acc:HGNC:13586]	0.000721021	-0.343015	0.128	0.216	1	Naive T	All other cells	ND1_7.Neftel_2019_10x Lymphocytes	0.473451	0.708101	0.1	1000
G6PD	glucose-6-phosphate dehydrogenase [Source:HGNC Symbol;Acc:HGNC:4057]	0.000724348	-0.492193	0.06	0.126	1	Naive T	All other cells	ND1_7.Neftel_2019_10x Lymphocytes	0.195672	0.38369	0.1	1000
KDELR2	KDEL endoplasmic reticulum protein retention receptor 2 [Source:HGNC Symbol;Acc:HGNC:6305]	0.000724864	-0.340322	0.173	0.272	1	Naive T	All other cells	ND1_7.Neftel_2019_10x Lymphocytes	0.636903	0.935643	0.1	1000
ST8SIA4	ST8 alpha-N-acetyl-neuraminide alpha-2,8-sialyltransferase 4 [Source:HGNC Symbol;Acc:HGNC:10871]	0.000727231	-0.589705	0.045	0.108	1	Naive T	All other cells	ND1_7.Neftel_2019_10x Lymphocytes	0.163937	0.375999	0.1	1000
STX4	syntaxin 4 [Source:HGNC Symbol;Acc:HGNC:11439]	0.000730893	-0.466574	0.063	0.125	1	Naive T	All other cells	ND1_7.Neftel_2019_10x Lymphocytes	0.21335	0.399644	0.1	1000
SUPT16H	SPT16 homolog, facilitates chromatin remodeling subunit [Source:HGNC Symbol;Acc:HGNC:11465]	0.000737029	-0.491663	0.078	0.148	1	Naive T	All other cells	ND1_7.Neftel_2019_10x Lymphocytes	0.256865	0.483486	0.1	1000
SYNGR2	synaptogyrin 2 [Source:HGNC Symbol;Acc:HGNC:11499]	0.000741085	-0.452424	0.149	0.228	1	Naive T	All other cells	ND1_7.Neftel_2019_10x Lymphocytes	0.485981	0.821232	0.1	1000
OTUB1	OTU deubiquitinase, ubiquitin aldehyde binding 1 [Source:HGNC Symbol;Acc:HGNC:23077]	0.000741563	-0.356459	0.17	0.264	1	Naive T	All other cells	ND1_7.Neftel_2019_10x Lymphocytes	0.64331	0.961642	0.1	1000
CDC25B	cell division cycle 25B [Source:HGNC Symbol;Acc:HGNC:1726]	0.000745595	0.461133	0.155	0.09	1	Naive T	All other cells	ND1_7.Neftel_2019_10x Lymphocytes	0.539657	0.303348	0.1	1000
POLR3GL	RNA polymerase III subunit GL [Source:HGNC Symbol;Acc:HGNC:28466]	0.000749665	-0.258862	0.269	0.37	1	Naive T	All other cells	ND1_7.Neftel_2019_10x Lymphocytes	1.06467	1.40878	0.1	1000
SF3B4	splicing factor 3b subunit 4 [Source:HGNC Symbol;Acc:HGNC:10771]	0.000758018	-0.406	0.101	0.184	1	Naive T	All other cells	ND1_7.Neftel_2019_10x Lymphocytes	0.363921	0.596253	0.1	1000
EPS15	epidermal growth factor receptor pathway substrate 15 [Source:HGNC Symbol;Acc:HGNC:3419]	0.000760237	-0.468479	0.084	0.161	1	Naive T	All other cells	ND1_7.Neftel_2019_10x Lymphocytes	0.323872	0.577162	0.1	1000
TXNDC9	thioredoxin domain containing 9 [Source:HGNC Symbol;Acc:HGNC:24110]	0.000765805	-0.364121	0.093	0.158	1	Naive T	All other cells	ND1_7.Neftel_2019_10x Lymphocytes	0.302839	0.479786	0.1	1000
RBBP4	RB binding protein 4, chromatin remodeling factor [Source:HGNC Symbol;Acc:HGNC:9887]	0.000770077	-0.427828	0.119	0.209	1	Naive T	All other cells	ND1_7.Neftel_2019_10x Lymphocytes	0.43441	0.719743	0.1	1000
UBE2S	ubiquitin conjugating enzyme E2 S [Source:HGNC Symbol;Acc:HGNC:17895]	0.000770863	-0.404723	0.045	0.107	1	Naive T	All other cells	ND1_7.Neftel_2019_10x Lymphocytes	0.197973	0.346628	0.1	1000
TGFB1	transforming growth factor beta 1 [Source:HGNC Symbol;Acc:HGNC:11766]	0.000775019	-0.327904	0.182	0.274	1	Naive T	All other cells	ND1_7.Neftel_2019_10x Lymphocytes	0.685889	0.990857	0.1	1000
SPAG7	sperm associated antigen 7 [Source:HGNC Symbol;Acc:HGNC:11216]	0.000786706	-0.424907	0.122	0.198	1	Naive T	All other cells	ND1_7.Neftel_2019_10x Lymphocytes	0.403044	0.66938	0.1	1000
LMAN2	lectin, mannose binding 2 [Source:HGNC Symbol;Acc:HGNC:16986]	0.000790467	-0.25655	0.281	0.376	1	Naive T	All other cells	ND1_7.Neftel_2019_10x Lymphocytes	1.06622	1.4073	0.1	1000
RPA1	replication protein A1 [Source:HGNC Symbol;Acc:HGNC:10289]	0.000795341	-0.542048	0.057	0.13	1	Naive T	All other cells	ND1_7.Neftel_2019_10x Lymphocytes	0.18112	0.383393	0.1	1000
TBC1D1	TBC1 domain family member 1 [Source:HGNC Symbol;Acc:HGNC:11578]	0.000811259	-0.555485	0.066	0.126	1	Naive T	All other cells	ND1_7.Neftel_2019_10x Lymphocytes	0.19864	0.420465	0.1	1000
GOLGB1	golgin B1 [Source:HGNC Symbol;Acc:HGNC:4429]	0.000812815	-0.556078	0.048	0.108	1	Naive T	All other cells	ND1_7.Neftel_2019_10x Lymphocytes	0.155438	0.345438	0.1	1000
ATG4B	autophagy related 4B cysteine peptidase [Source:HGNC Symbol;Acc:HGNC:20790]	0.000828984	-0.676158	0.045	0.105	1	Naive T	All other cells	ND1_7.Neftel_2019_10x Lymphocytes	0.11739	0.327455	0.1	1000
SUCLG1	succinate-CoA ligase GDP/ADP-forming subunit alpha [Source:HGNC Symbol;Acc:HGNC:11449]	0.000832428	-0.37722	0.131	0.22	1	Naive T	All other cells	ND1_7.Neftel_2019_10x Lymphocytes	0.462709	0.720556	0.1	1000
MRPL13	mitochondrial ribosomal protein L13 [Source:HGNC Symbol;Acc:HGNC:14278]	0.000833232	-0.325802	0.104	0.18	1	Naive T	All other cells	ND1_7.Neftel_2019_10x Lymphocytes	0.372818	0.55492	0.1	1000
HNRNPU	heterogeneous nuclear ribonucleoprotein U [Source:HGNC Symbol;Acc:HGNC:5048]	0.00083375	-0.264157	0.29	0.386	1	Naive T	All other cells	ND1_7.Neftel_2019_10x Lymphocytes	1.1299	1.50174	0.1	1000
ADAR	adenosine deaminase RNA specific [Source:HGNC Symbol;Acc:HGNC:225]	0.000840596	-0.344394	0.155	0.235	1	Naive T	All other cells	ND1_7.Neftel_2019_10x Lymphocytes	0.597325	0.88402	0.1	1000
TPGS2	tubulin polyglutamylase complex subunit 2 [Source:HGNC Symbol;Acc:HGNC:24561]	0.000841278	-0.372765	0.075	0.145	1	Naive T	All other cells	ND1_7.Neftel_2019_10x Lymphocytes	0.262971	0.42694	0.1	1000
PSMF1	proteasome inhibitor subunit 1 [Source:HGNC Symbol;Acc:HGNC:9571]	0.000844704	-0.338389	0.167	0.266	1	Naive T	All other cells	ND1_7.Neftel_2019_10x Lymphocytes	0.636584	0.933196	0.1	1000
MCM3	minichromosome maintenance complex component 3 [Source:HGNC Symbol;Acc:HGNC:6945]	0.000850348	-0.480858	0.054	0.119	1	Naive T	All other cells	ND1_7.Neftel_2019_10x Lymphocytes	0.184641	0.360396	0.1	1000
CD7	CD7 molecule [Source:HGNC Symbol;Acc:HGNC:1695]	0.000862579	-0.558481	0.537	0.572	1	Naive T	All other cells	ND1_7.Neftel_2019_10x Lymphocytes	3.68791	6.52133	0.1	1000
MRPL28	mitochondrial ribosomal protein L28 [Source:HGNC Symbol;Acc:HGNC:14484]	0.000875384	-0.445539	0.128	0.218	1	Naive T	All other cells	ND1_7.Neftel_2019_10x Lymphocytes	0.460902	0.775754	0.1	1000
ELMO1	engulfment and cell motility 1 [Source:HGNC Symbol;Acc:HGNC:16286]	0.00088214	-0.681428	0.054	0.114	1	Naive T	All other cells	ND1_7.Neftel_2019_10x Lymphocytes	0.165047	0.423918	0.1	1000
RANBP2	RAN binding protein 2 [Source:HGNC Symbol;Acc:HGNC:9848]	0.000887738	-0.499165	0.054	0.112	1	Naive T	All other cells	ND1_7.Neftel_2019_10x Lymphocytes	0.186956	0.372716	0.1	1000
CMTM3	CKLF like MARVEL transmembrane domain containing 3 [Source:HGNC Symbol;Acc:HGNC:19174]	0.000907179	-0.396174	0.185	0.279	1	Naive T	All other cells	ND1_7.Neftel_2019_10x Lymphocytes	0.656854	1.02478	0.1	1000
HDDC2	HD domain containing 2 [Source:HGNC Symbol;Acc:HGNC:21078]	0.000908624	-0.372705	0.149	0.218	1	Naive T	All other cells	ND1_7.Neftel_2019_10x Lymphocytes	0.4861	0.750815	0.1	1000
DKC1	dyskerin pseudouridine synthase 1 [Source:HGNC Symbol;Acc:HGNC:2890]	0.000909526	-0.516531	0.054	0.109	1	Naive T	All other cells	ND1_7.Neftel_2019_10x Lymphocytes	0.153829	0.32547	0.1	1000
NOP56	NOP56 ribonucleoprotein [Source:HGNC Symbol;Acc:HGNC:15911]	0.000917951	-0.391413	0.125	0.203	1	Naive T	All other cells	ND1_7.Neftel_2019_10x Lymphocytes	0.411109	0.655966	0.1	1000
CCDC85B	coiled-coil domain containing 85B [Source:HGNC Symbol;Acc:HGNC:24926]	0.000920257	-0.328735	0.37	0.467	1	Naive T	All other cells	ND1_7.Neftel_2019_10x Lymphocytes	1.45609	2.06173	0.1	1000
USP8	ubiquitin specific peptidase 8 [Source:HGNC Symbol;Acc:HGNC:12631]	0.000923837	-0.463204	0.075	0.149	1	Naive T	All other cells	ND1_7.Neftel_2019_10x Lymphocytes	0.279139	0.502512	0.1	1000
ENY2	ENY2 transcription and export complex 2 subunit [Source:HGNC Symbol;Acc:HGNC:24449]	0.000925821	-0.374262	0.26	0.386	1	Naive T	All other cells	ND1_7.Neftel_2019_10x Lymphocytes	1.00439	1.50569	0.1	1000
SMG1	SMG1 nonsense mediated mRNA decay associated PI3K related kinase [Source:HGNC Symbol;Acc:HGNC:30045]	0.000926452	-0.504928	0.081	0.148	1	Naive T	All other cells	ND1_7.Neftel_2019_10x Lymphocytes	0.286242	0.539952	0.1	1000
ABHD3	abhydrolase domain containing 3, phospholipase [Source:HGNC Symbol;Acc:HGNC:18718]	0.000928814	-0.566597	0.042	0.106	1	Naive T	All other cells	ND1_7.Neftel_2019_10x Lymphocytes	0.15367	0.347033	0.1	1000
ZNF655	zinc finger protein 655 [Source:HGNC Symbol;Acc:HGNC:30899]	0.000939453	-0.561486	0.087	0.172	1	Naive T	All other cells	ND1_7.Neftel_2019_10x Lymphocytes	0.281441	0.568771	0.1	1000
NCKAP1L	NCK associated protein 1 like [Source:HGNC Symbol;Acc:HGNC:4862]	0.000943252	-0.332592	0.113	0.196	1	Naive T	All other cells	ND1_7.Neftel_2019_10x Lymphocytes	0.439712	0.652671	0.1	1000
CD81	CD81 molecule [Source:HGNC Symbol;Acc:HGNC:1701]	0.000949032	-0.51069	0.072	0.135	1	Naive T	All other cells	ND1_7.Neftel_2019_10x Lymphocytes	0.233905	0.456432	0.1	1000
MRPL42	mitochondrial ribosomal protein L42 [Source:HGNC Symbol;Acc:HGNC:14493]	0.000962921	-0.516407	0.096	0.179	1	Naive T	All other cells	ND1_7.Neftel_2019_10x Lymphocytes	0.315806	0.59689	0.1	1000
TUBA4A	tubulin alpha 4a [Source:HGNC Symbol;Acc:HGNC:12407]	0.000963235	-0.273416	0.439	0.544	1	Naive T	All other cells	ND1_7.Neftel_2019_10x Lymphocytes	2.27086	3.01637	0.1	1000
SERBP1	SERPINE1 mRNA binding protein 1 [Source:HGNC Symbol;Acc:HGNC:17860]	0.000967187	-0.262983	0.457	0.555	1	Naive T	All other cells	ND1_7.Neftel_2019_10x Lymphocytes	1.97503	2.5992	0.1	1000
DDB1	damage specific DNA binding protein 1 [Source:HGNC Symbol;Acc:HGNC:2717]	0.00096799	-0.567432	0.054	0.117	1	Naive T	All other cells	ND1_7.Neftel_2019_10x Lymphocytes	0.1698	0.375854	0.1	1000
RPL26L1	ribosomal protein L26 like 1 [Source:HGNC Symbol;Acc:HGNC:17050]	0.000971901	-0.334068	0.084	0.151	1	Naive T	All other cells	ND1_7.Neftel_2019_10x Lymphocytes	0.300597	0.459489	0.1	1000
HCFC1R1	host cell factor C1 regulator 1 [Source:HGNC Symbol;Acc:HGNC:21198]	0.000973225	-0.402862	0.078	0.14	1	Naive T	All other cells	ND1_7.Neftel_2019_10x Lymphocytes	0.279809	0.468233	0.1	1000
POLR2B	RNA polymerase II subunit B [Source:HGNC Symbol;Acc:HGNC:9188]	0.000973418	-0.363132	0.119	0.193	1	Naive T	All other cells	ND1_7.Neftel_2019_10x Lymphocytes	0.405285	0.626512	0.1	1000
NUDC	nuclear distribution C, dynein complex regulator [Source:HGNC Symbol;Acc:HGNC:8045]	0.00097633	-0.395362	0.2	0.302	1	Naive T	All other cells	ND1_7.Neftel_2019_10x Lymphocytes	0.692069	1.07616	0.1	1000
XRCC6	X-ray repair cross complementing 6 [Source:HGNC Symbol;Acc:HGNC:4055]	0.000984781	-0.281017	0.355	0.439	1	Naive T	All other cells	ND1_7.Neftel_2019_10x Lymphocytes	1.27587	1.72231	0.1	1000
UTRN	utrophin [Source:HGNC Symbol;Acc:HGNC:12635]	0.00098523	-0.56065	0.078	0.157	1	Naive T	All other cells	ND1_7.Neftel_2019_10x Lymphocytes	0.272194	0.552013	0.1	1000
RRP7A	ribosomal RNA processing 7 homolog A [Source:HGNC Symbol;Acc:HGNC:24286]	0.000991328	-0.421392	0.104	0.187	1	Naive T	All other cells	ND1_7.Neftel_2019_10x Lymphocytes	0.354949	0.59338	0.1	1000
NDUFB6	NADH:ubiquinone oxidoreductase subunit B6 [Source:HGNC Symbol;Acc:HGNC:7701]	0.000991777	-0.342521	0.233	0.326	1	Naive T	All other cells	ND1_7.Neftel_2019_10x Lymphocytes	0.845771	1.23211	0.1	1000
SCFD1	sec1 family domain containing 1 [Source:HGNC Symbol;Acc:HGNC:20726]	0.000992848	-0.593159	0.048	0.113	1	Naive T	All other cells	ND1_7.Neftel_2019_10x Lymphocytes	0.14909	0.350777	0.1	1000
UBXN4	UBX domain protein 4 [Source:HGNC Symbol;Acc:HGNC:14860]	0.000993258	-0.411725	0.293	0.396	1	Naive T	All other cells	ND1_7.Neftel_2019_10x Lymphocytes	1.08589	1.69	0.1	1000
ALG5	ALG5 dolichyl-phosphate beta-glucosyltransferase [Source:HGNC Symbol;Acc:HGNC:20266]	0.000993589	-0.43241	0.081	0.153	1	Naive T	All other cells	ND1_7.Neftel_2019_10x Lymphocytes	0.2667	0.465072	0.1	1000
CHMP4B	charged multivesicular body protein 4B [Source:HGNC Symbol;Acc:HGNC:16171]	0.000998885	-0.393015	0.093	0.164	1	Naive T	All other cells	ND1_7.Neftel_2019_10x Lymphocytes	0.315067	0.514897	0.1	1000
MANF	mesencephalic astrocyte derived neurotrophic factor [Source:HGNC Symbol;Acc:HGNC:15461]	0.00100147	-0.402835	0.17	0.268	1	Naive T	All other cells	ND1_7.Neftel_2019_10x Lymphocytes	0.638219	1.00442	0.1	1000
MRPS12	mitochondrial ribosomal protein S12 [Source:HGNC Symbol;Acc:HGNC:10380]	0.00100625	-0.392632	0.128	0.215	1	Naive T	All other cells	ND1_7.Neftel_2019_10x Lymphocytes	0.456923	0.724733	0.1	1000
CDC123	cell division cycle 123 [Source:HGNC Symbol;Acc:HGNC:16827]	0.00101286	-0.377647	0.137	0.225	1	Naive T	All other cells	ND1_7.Neftel_2019_10x Lymphocytes	0.461492	0.719131	0.1	1000
TSPO	translocator protein [Source:HGNC Symbol;Acc:HGNC:1158]	0.00101736	-0.256402	0.484	0.57	1	Naive T	All other cells	ND1_7.Neftel_2019_10x Lymphocytes	2.11352	2.76047	0.1	1000
MYDGF	myeloid derived growth factor [Source:HGNC Symbol;Acc:HGNC:16948]	0.00102123	-0.338678	0.197	0.288	1	Naive T	All other cells	ND1_7.Neftel_2019_10x Lymphocytes	0.731776	1.06706	0.1	1000
EIF5A	eukaryotic translation initiation factor 5A [Source:HGNC Symbol;Acc:HGNC:3300]	0.00102174	-0.267874	0.325	0.436	1	Naive T	All other cells	ND1_7.Neftel_2019_10x Lymphocytes	1.38496	1.84111	0.1	1000
FLT3LG	fms related receptor tyrosine kinase 3 ligand [Source:HGNC Symbol;Acc:HGNC:3766]	0.00104438	0.381751	0.352	0.274	1	Naive T	All other cells	ND1_7.Neftel_2019_10x Lymphocytes	1.67116	1.10911	0.1	1000
MRPL55	mitochondrial ribosomal protein L55 [Source:HGNC Symbol;Acc:HGNC:16686]	0.00104869	-0.298785	0.134	0.209	1	Naive T	All other cells	ND1_7.Neftel_2019_10x Lymphocytes	0.494883	0.702033	0.1	1000
TMEM14B	transmembrane protein 14B [Source:HGNC Symbol;Acc:HGNC:21384]	0.00105029	-0.255463	0.296	0.42	1	Naive T	All other cells	ND1_7.Neftel_2019_10x Lymphocytes	1.27228	1.6717	0.1	1000
SRA1	steroid receptor RNA activator 1 [Source:HGNC Symbol;Acc:HGNC:11281]	0.00105927	-0.399629	0.104	0.189	1	Naive T	All other cells	ND1_7.Neftel_2019_10x Lymphocytes	0.382383	0.619364	0.1	1000
THEMIS	thymocyte selection associated [Source:HGNC Symbol;Acc:HGNC:21569]	0.00106818	-0.353344	0.096	0.157	1	Naive T	All other cells	ND1_7.Neftel_2019_10x Lymphocytes	0.35767	0.551641	0.1	1000
SF3B1	splicing factor 3b subunit 1 [Source:HGNC Symbol;Acc:HGNC:10768]	0.00107959	-0.264991	0.272	0.367	1	Naive T	All other cells	ND1_7.Neftel_2019_10x Lymphocytes	1.11146	1.47904	0.1	1000
MCTS1	MCTS1 re-initiation and release factor [Source:HGNC Symbol;Acc:HGNC:23357]	0.00107988	-0.331205	0.137	0.216	1	Naive T	All other cells	ND1_7.Neftel_2019_10x Lymphocytes	0.481876	0.710346	0.1	1000
CALHM2	calcium homeostasis modulator family member 2 [Source:HGNC Symbol;Acc:HGNC:23493]	0.00108145	-0.623231	0.039	0.102	1	Naive T	All other cells	ND1_7.Neftel_2019_10x Lymphocytes	0.130071	0.329069	0.1	1000
SAR1A	secretion associated Ras related GTPase 1A [Source:HGNC Symbol;Acc:HGNC:10534]	0.00108342	-0.490564	0.116	0.207	1	Naive T	All other cells	ND1_7.Neftel_2019_10x Lymphocytes	0.384395	0.691133	0.1	1000
PSAP	prosaposin [Source:HGNC Symbol;Acc:HGNC:9498]	0.00109467	-0.35282	0.337	0.445	1	Naive T	All other cells	ND1_7.Neftel_2019_10x Lymphocytes	1.32793	1.93206	0.1	1000
BAK1	BCL2 antagonist/killer 1 [Source:HGNC Symbol;Acc:HGNC:949]	0.00109612	-0.424268	0.06	0.121	1	Naive T	All other cells	ND1_7.Neftel_2019_10x Lymphocytes	0.209096	0.372445	0.1	1000
BLVRA	biliverdin reductase A [Source:HGNC Symbol;Acc:HGNC:1062]	0.00110035	-0.54034	0.057	0.112	1	Naive T	All other cells	ND1_7.Neftel_2019_10x Lymphocytes	0.167282	0.358814	0.1	1000
OLA1	Obg like ATPase 1 [Source:HGNC Symbol;Acc:HGNC:28833]	0.00110857	-0.325888	0.158	0.236	1	Naive T	All other cells	ND1_7.Neftel_2019_10x Lymphocytes	0.541519	0.788671	0.1	1000
AGPAT2	1-acylglycerol-3-phosphate O-acyltransferase 2 [Source:HGNC Symbol;Acc:HGNC:325]	0.00111407	-0.432016	0.057	0.133	1	Naive T	All other cells	ND1_7.Neftel_2019_10x Lymphocytes	0.232189	0.411691	0.1	1000
TMED9	transmembrane p24 trafficking protein 9 [Source:HGNC Symbol;Acc:HGNC:24878]	0.00112189	-0.358519	0.233	0.341	1	Naive T	All other cells	ND1_7.Neftel_2019_10x Lymphocytes	0.884237	1.30865	0.1	1000
NDUFAB1	NADH:ubiquinone oxidoreductase subunit AB1 [Source:HGNC Symbol;Acc:HGNC:7694]	0.00113034	-0.299258	0.281	0.376	1	Naive T	All other cells	ND1_7.Neftel_2019_10x Lymphocytes	0.999722	1.38337	0.1	1000
GMIP	GEM interacting protein [Source:HGNC Symbol;Acc:HGNC:24852]	0.00113698	-0.383703	0.051	0.11	1	Naive T	All other cells	ND1_7.Neftel_2019_10x Lymphocytes	0.195276	0.333379	0.1	1000
ACTR10	actin related protein 10 [Source:HGNC Symbol;Acc:HGNC:17372]	0.00114772	-0.400956	0.09	0.159	1	Naive T	All other cells	ND1_7.Neftel_2019_10x Lymphocytes	0.305545	0.505581	0.1	1000
RNF166	ring finger protein 166 [Source:HGNC Symbol;Acc:HGNC:28856]	0.00114837	-0.389382	0.137	0.22	1	Naive T	All other cells	ND1_7.Neftel_2019_10x Lymphocytes	0.507085	0.796099	0.1	1000
ACP1	acid phosphatase 1 [Source:HGNC Symbol;Acc:HGNC:122]	0.001152	-0.340652	0.194	0.289	1	Naive T	All other cells	ND1_7.Neftel_2019_10x Lymphocytes	0.696291	1.01948	0.1	1000
USP10	ubiquitin specific peptidase 10 [Source:HGNC Symbol;Acc:HGNC:12608]	0.00115702	0.472835	0.149	0.092	1	Naive T	All other cells	ND1_7.Neftel_2019_10x Lymphocytes	0.523813	0.288781	0.1	1000
UQCRC1	ubiquinol-cytochrome c reductase core protein 1 [Source:HGNC Symbol;Acc:HGNC:12585]	0.00115938	-0.290009	0.149	0.229	1	Naive T	All other cells	ND1_7.Neftel_2019_10x Lymphocytes	0.549515	0.768038	0.1	1000
PCBD1	pterin-4 alpha-carbinolamine dehydratase 1 [Source:HGNC Symbol;Acc:HGNC:8646]	0.00116249	-0.346815	0.057	0.119	1	Naive T	All other cells	ND1_7.Neftel_2019_10x Lymphocytes	0.229012	0.365406	0.1	1000
TMX1	thioredoxin related transmembrane protein 1 [Source:HGNC Symbol;Acc:HGNC:15487]	0.00116788	-0.387892	0.14	0.22	1	Naive T	All other cells	ND1_7.Neftel_2019_10x Lymphocytes	0.464568	0.732101	0.1	1000
STRAP	serine/threonine kinase receptor associated protein [Source:HGNC Symbol;Acc:HGNC:30796]	0.00117054	-0.269548	0.2	0.3	1	Naive T	All other cells	ND1_7.Neftel_2019_10x Lymphocytes	0.797345	1.07496	0.1	1000
PRKAG1	protein kinase AMP-activated non-catalytic subunit gamma 1 [Source:HGNC Symbol;Acc:HGNC:9385]	0.00117199	-0.471861	0.057	0.124	1	Naive T	All other cells	ND1_7.Neftel_2019_10x Lymphocytes	0.192486	0.368847	0.1	1000
ACAT2	acetyl-CoA acetyltransferase 2 [Source:HGNC Symbol;Acc:HGNC:94]	0.00119185	-0.399215	0.057	0.113	1	Naive T	All other cells	ND1_7.Neftel_2019_10x Lymphocytes	0.191476	0.33449	0.1	1000
MAPRE1	microtubule associated protein RP/EB family member 1 [Source:HGNC Symbol;Acc:HGNC:6890]	0.00119849	-0.424609	0.134	0.223	1	Naive T	All other cells	ND1_7.Neftel_2019_10x Lymphocytes	0.45051	0.741726	0.1	1000
PSMD9	proteasome 26S subunit, non-ATPase 9 [Source:HGNC Symbol;Acc:HGNC:9567]	0.00121875	-0.521312	0.066	0.128	1	Naive T	All other cells	ND1_7.Neftel_2019_10x Lymphocytes	0.202843	0.410059	0.1	1000
CTBP1	C-terminal binding protein 1 [Source:HGNC Symbol;Acc:HGNC:2494]	0.00122959	-0.455488	0.063	0.125	1	Naive T	All other cells	ND1_7.Neftel_2019_10x Lymphocytes	0.212656	0.393041	0.1	1000
ADGRE5	adhesion G protein-coupled receptor E5 [Source:HGNC Symbol;Acc:HGNC:1711]	0.00123143	-0.291997	0.257	0.346	1	Naive T	All other cells	ND1_7.Neftel_2019_10x Lymphocytes	1.08598	1.48814	0.1	1000
CBFB	core-binding factor subunit beta [Source:HGNC Symbol;Acc:HGNC:1539]	0.00123282	-0.448477	0.122	0.212	1	Naive T	All other cells	ND1_7.Neftel_2019_10x Lymphocytes	0.481869	0.811164	0.1	1000
PHLDA1	pleckstrin homology like domain family A member 1 [Source:HGNC Symbol;Acc:HGNC:8933]	0.00124047	-0.390833	0.054	0.114	1	Naive T	All other cells	ND1_7.Neftel_2019_10x Lymphocytes	0.289259	0.475407	0.1	1000
HSP90AB1	heat shock protein 90 alpha family class B member 1 [Source:HGNC Symbol;Acc:HGNC:5258]	0.00124086	-0.271207	0.642	0.692	1	Naive T	All other cells	ND1_7.Neftel_2019_10x Lymphocytes	3.81212	5.03092	0.1	1000
IDH3G	isocitrate dehydrogenase (NAD(+)) 3 non-catalytic subunit gamma [Source:HGNC Symbol;Acc:HGNC:5386]	0.00124645	-0.403865	0.131	0.215	1	Naive T	All other cells	ND1_7.Neftel_2019_10x Lymphocytes	0.446902	0.719042	0.1	1000
KIAA2026	KIAA2026 [Source:HGNC Symbol;Acc:HGNC:23378]	0.00125117	-0.409184	0.051	0.101	1	Naive T	All other cells	ND1_7.Neftel_2019_10x Lymphocytes	0.187184	0.33238	0.1	1000
IMP4	IMP U3 small nucleolar ribonucleoprotein 4 [Source:HGNC Symbol;Acc:HGNC:30856]	0.00126178	-0.519084	0.093	0.163	1	Naive T	All other cells	ND1_7.Neftel_2019_10x Lymphocytes	0.276554	0.532795	0.1	1000
PBDC1	polysaccharide biosynthesis domain containing 1 [Source:HGNC Symbol;Acc:HGNC:28790]	0.00126626	-0.461209	0.096	0.158	1	Naive T	All other cells	ND1_7.Neftel_2019_10x Lymphocytes	0.280487	0.503449	0.1	1000
DEK	DEK proto-oncogene [Source:HGNC Symbol;Acc:HGNC:2768]	0.00127087	-0.360667	0.319	0.409	1	Naive T	All other cells	ND1_7.Neftel_2019_10x Lymphocytes	1.20046	1.76523	0.1	1000
FOXP1	forkhead box P1 [Source:HGNC Symbol;Acc:HGNC:3823]	0.00128262	0.321529	0.31	0.235	1	Naive T	All other cells	ND1_7.Neftel_2019_10x Lymphocytes	1.37604	0.97019	0.1	1000
C22orf39	chromosome 22 open reading frame 39 [Source:HGNC Symbol;Acc:HGNC:27012]	0.00129185	-0.502889	0.081	0.143	1	Naive T	All other cells	ND1_7.Neftel_2019_10x Lymphocytes	0.246872	0.473549	0.1	1000
DHX15	DEAH-box helicase 15 [Source:HGNC Symbol;Acc:HGNC:2738]	0.00129915	-0.325016	0.066	0.12	1	Naive T	All other cells	ND1_7.Neftel_2019_10x Lymphocytes	0.239987	0.370561	0.1	1000
IFI44	interferon induced protein 44 [Source:HGNC Symbol;Acc:HGNC:16938]	0.00130024	-0.501364	0.122	0.201	1	Naive T	All other cells	ND1_7.Neftel_2019_10x Lymphocytes	0.463614	0.830511	0.1	1000
HSP90B1	heat shock protein 90 beta family member 1 [Source:HGNC Symbol;Acc:HGNC:12028]	0.00131452	-0.295552	0.325	0.414	1	Naive T	All other cells	ND1_7.Neftel_2019_10x Lymphocytes	1.2452	1.70776	0.1	1000
HNRNPH3	heterogeneous nuclear ribonucleoprotein H3 [Source:HGNC Symbol;Acc:HGNC:5043]	0.00133014	-0.318619	0.194	0.258	1	Naive T	All other cells	ND1_7.Neftel_2019_10x Lymphocytes	0.639734	0.917303	0.1	1000
RNF181	ring finger protein 181 [Source:HGNC Symbol;Acc:HGNC:28037]	0.00135813	-0.434688	0.218	0.33	1	Naive T	All other cells	ND1_7.Neftel_2019_10x Lymphocytes	0.788716	1.27261	0.1	1000
HNRNPD	heterogeneous nuclear ribonucleoprotein D [Source:HGNC Symbol;Acc:HGNC:5036]	0.00136867	-0.326609	0.167	0.241	1	Naive T	All other cells	ND1_7.Neftel_2019_10x Lymphocytes	0.572418	0.832146	0.1	1000
GNAI2	G protein subunit alpha i2 [Source:HGNC Symbol;Acc:HGNC:4385]	0.00138269	-0.298431	0.206	0.313	1	Naive T	All other cells	ND1_7.Neftel_2019_10x Lymphocytes	0.845967	1.17492	0.1	1000
KPNA2	karyopherin subunit alpha 2 [Source:HGNC Symbol;Acc:HGNC:6395]	0.00139664	-0.574835	0.057	0.125	1	Naive T	All other cells	ND1_7.Neftel_2019_10x Lymphocytes	0.195363	0.424812	0.1	1000
RABGAP1L	RAB GTPase activating protein 1 like [Source:HGNC Symbol;Acc:HGNC:24663]	0.00139924	-0.290004	0.134	0.206	1	Naive T	All other cells	ND1_7.Neftel_2019_10x Lymphocytes	0.554618	0.774852	0.1	1000
IER3IP1	immediate early response 3 interacting protein 1 [Source:HGNC Symbol;Acc:HGNC:18550]	0.00140713	-0.45979	0.075	0.134	1	Naive T	All other cells	ND1_7.Neftel_2019_10x Lymphocytes	0.22801	0.419484	0.1	1000
PPP2R1A	protein phosphatase 2 scaffold subunit Aalpha [Source:HGNC Symbol;Acc:HGNC:9302]	0.00142668	-0.320756	0.17	0.268	1	Naive T	All other cells	ND1_7.Neftel_2019_10x Lymphocytes	0.669865	0.961004	0.1	1000
DCAF13	DDB1 and CUL4 associated factor 13 [Source:HGNC Symbol;Acc:HGNC:24535]	0.00142836	-0.590545	0.048	0.106	1	Naive T	All other cells	ND1_7.Neftel_2019_10x Lymphocytes	0.133274	0.321052	0.1	1000
CHD3	chromodomain helicase DNA binding protein 3 [Source:HGNC Symbol;Acc:HGNC:1918]	0.00143497	-0.508196	0.051	0.111	1	Naive T	All other cells	ND1_7.Neftel_2019_10x Lymphocytes	0.174807	0.356809	0.1	1000
ARHGAP25	Rho GTPase activating protein 25 [Source:HGNC Symbol;Acc:HGNC:28951]	0.00143827	-0.443309	0.099	0.171	1	Naive T	All other cells	ND1_7.Neftel_2019_10x Lymphocytes	0.3371	0.580937	0.1	1000
FDPS	farnesyl diphosphate synthase [Source:HGNC Symbol;Acc:HGNC:3631]	0.0014595	-0.299885	0.146	0.222	1	Naive T	All other cells	ND1_7.Neftel_2019_10x Lymphocytes	0.510204	0.723594	0.1	1000
LRRC59	leucine rich repeat containing 59 [Source:HGNC Symbol;Acc:HGNC:28817]	0.00146956	-0.62189	0.039	0.101	1	Naive T	All other cells	ND1_7.Neftel_2019_10x Lymphocytes	0.108202	0.287764	0.1	1000
ANAPC5	anaphase promoting complex subunit 5 [Source:HGNC Symbol;Acc:HGNC:15713]	0.00147089	-0.410379	0.128	0.221	1	Naive T	All other cells	ND1_7.Neftel_2019_10x Lymphocytes	0.458434	0.741777	0.1	1000
UBE2V2	ubiquitin conjugating enzyme E2 V2 [Source:HGNC Symbol;Acc:HGNC:12495]	0.00149002	-0.41981	0.134	0.227	1	Naive T	All other cells	ND1_7.Neftel_2019_10x Lymphocytes	0.442175	0.725013	0.1	1000
OGFR	opioid growth factor receptor [Source:HGNC Symbol;Acc:HGNC:15768]	0.00149578	-0.418173	0.084	0.142	1	Naive T	All other cells	ND1_7.Neftel_2019_10x Lymphocytes	0.271108	0.463781	0.1	1000
SNRNP40	small nuclear ribonucleoprotein U5 subunit 40 [Source:HGNC Symbol;Acc:HGNC:30857]	0.00149913	-0.365921	0.125	0.205	1	Naive T	All other cells	ND1_7.Neftel_2019_10x Lymphocytes	0.441484	0.680734	0.1	1000
TRAPPC3	trafficking protein particle complex 3 [Source:HGNC Symbol;Acc:HGNC:19942]	0.00150817	-0.413298	0.116	0.203	1	Naive T	All other cells	ND1_7.Neftel_2019_10x Lymphocytes	0.408069	0.668097	0.1	1000
PAFAH1B3	platelet activating factor acetylhydrolase 1b catalytic subunit 3 [Source:HGNC Symbol;Acc:HGNC:8576]	0.00151695	-0.394099	0.078	0.133	1	Naive T	All other cells	ND1_7.Neftel_2019_10x Lymphocytes	0.240033	0.404285	0.1	1000
MAP4K2	mitogen-activated protein kinase kinase kinase kinase 2 [Source:HGNC Symbol;Acc:HGNC:6864]	0.00152228	0.488841	0.113	0.061	1	Naive T	All other cells	ND1_7.Neftel_2019_10x Lymphocytes	0.374744	0.191178	0.1	1000
C1D	C1D nuclear receptor corepressor [Source:HGNC Symbol;Acc:HGNC:29911]	0.00152252	-0.344159	0.119	0.182	1	Naive T	All other cells	ND1_7.Neftel_2019_10x Lymphocytes	0.383028	0.581457	0.1	1000
SIRPG	signal regulatory protein gamma [Source:HGNC Symbol;Acc:HGNC:15757]	0.00155297	-0.448756	0.099	0.171	1	Naive T	All other cells	ND1_7.Neftel_2019_10x Lymphocytes	0.348381	0.602327	0.1	1000
GGCT	gamma-glutamylcyclotransferase [Source:HGNC Symbol;Acc:HGNC:21705]	0.00155494	-0.517044	0.051	0.12	1	Naive T	All other cells	ND1_7.Neftel_2019_10x Lymphocytes	0.170822	0.354185	0.1	1000
KRTCAP2	keratinocyte associated protein 2 [Source:HGNC Symbol;Acc:HGNC:28942]	0.00157099	-0.306497	0.325	0.412	1	Naive T	All other cells	ND1_7.Neftel_2019_10x Lymphocytes	1.25447	1.74026	0.1	1000
RNPS1	RNA binding protein with serine rich domain 1 [Source:HGNC Symbol;Acc:HGNC:10080]	0.00158237	-0.268207	0.251	0.337	1	Naive T	All other cells	ND1_7.Neftel_2019_10x Lymphocytes	0.922097	1.23651	0.1	1000
VCP	valosin containing protein [Source:HGNC Symbol;Acc:HGNC:12666]	0.00159665	-0.379607	0.221	0.323	1	Naive T	All other cells	ND1_7.Neftel_2019_10x Lymphocytes	0.783284	1.19111	0.1	1000
TM9SF2	transmembrane 9 superfamily member 2 [Source:HGNC Symbol;Acc:HGNC:11865]	0.00160673	-0.37005	0.093	0.149	1	Naive T	All other cells	ND1_7.Neftel_2019_10x Lymphocytes	0.307247	0.489615	0.1	1000
RING1	ring finger protein 1 [Source:HGNC Symbol;Acc:HGNC:10018]	0.00162956	-0.283226	0.057	0.104	1	Naive T	All other cells	ND1_7.Neftel_2019_10x Lymphocytes	0.211134	0.313001	0.1	1000
GPN1	GPN-loop GTPase 1 [Source:HGNC Symbol;Acc:HGNC:17030]	0.001645	-0.385634	0.054	0.104	1	Naive T	All other cells	ND1_7.Neftel_2019_10x Lymphocytes	0.169956	0.296983	0.1	1000
CARHSP1	calcium regulated heat stable protein 1 [Source:HGNC Symbol;Acc:HGNC:17150]	0.00165206	-0.415919	0.14	0.23	1	Naive T	All other cells	ND1_7.Neftel_2019_10x Lymphocytes	0.52243	0.843457	0.1	1000
AHSA1	activator of HSP90 ATPase activity 1 [Source:HGNC Symbol;Acc:HGNC:1189]	0.00165714	-0.422811	0.119	0.193	1	Naive T	All other cells	ND1_7.Neftel_2019_10x Lymphocytes	0.397401	0.659155	0.1	1000
MRPL41	mitochondrial ribosomal protein L41 [Source:HGNC Symbol;Acc:HGNC:14492]	0.00165827	-0.284772	0.296	0.399	1	Naive T	All other cells	ND1_7.Neftel_2019_10x Lymphocytes	1.13778	1.54557	0.1	1000
EIF5B	eukaryotic translation initiation factor 5B [Source:HGNC Symbol;Acc:HGNC:30793]	0.0016674	-0.394762	0.191	0.279	1	Naive T	All other cells	ND1_7.Neftel_2019_10x Lymphocytes	0.684385	1.06405	0.1	1000
UBE3A	ubiquitin protein ligase E3A [Source:HGNC Symbol;Acc:HGNC:12496]	0.00168108	-0.365337	0.081	0.151	1	Naive T	All other cells	ND1_7.Neftel_2019_10x Lymphocytes	0.299285	0.475369	0.1	1000
TOP1	DNA topoisomerase I [Source:HGNC Symbol;Acc:HGNC:11986]	0.00168669	-0.387471	0.134	0.216	1	Naive T	All other cells	ND1_7.Neftel_2019_10x Lymphocytes	0.459606	0.724439	0.1	1000
MRPL17	mitochondrial ribosomal protein L17 [Source:HGNC Symbol;Acc:HGNC:14053]	0.00169091	-0.391178	0.066	0.118	1	Naive T	All other cells	ND1_7.Neftel_2019_10x Lymphocytes	0.236845	0.3981	0.1	1000
POP7	POP7 homolog, ribonuclease P/MRP subunit [Source:HGNC Symbol;Acc:HGNC:19949]	0.00169333	-0.616357	0.06	0.123	1	Naive T	All other cells	ND1_7.Neftel_2019_10x Lymphocytes	0.157735	0.377368	0.1	1000
RAB2A	RAB2A, member RAS oncogene family [Source:HGNC Symbol;Acc:HGNC:9763]	0.00169345	-0.332789	0.212	0.301	1	Naive T	All other cells	ND1_7.Neftel_2019_10x Lymphocytes	0.76241	1.10294	0.1	1000
YWHAH	tyrosine 3-monooxygenase/tryptophan 5-monooxygenase activation protein eta [Source:HGNC Symbol;Acc:HGNC:12853]	0.00169563	-0.3376	0.209	0.291	1	Naive T	All other cells	ND1_7.Neftel_2019_10x Lymphocytes	0.708115	1.03264	0.1	1000
FIP1L1	factor interacting with PAPOLA and CPSF1 [Source:HGNC Symbol;Acc:HGNC:19124]	0.00170068	-0.394576	0.099	0.152	1	Naive T	All other cells	ND1_7.Neftel_2019_10x Lymphocytes	0.294091	0.484734	0.1	1000
AP3M2	adaptor related protein complex 3 subunit mu 2 [Source:HGNC Symbol;Acc:HGNC:570]	0.00170869	0.537171	0.152	0.092	1	Naive T	All other cells	ND1_7.Neftel_2019_10x Lymphocytes	0.60483	0.311902	0.1	1000
STAT4	signal transducer and activator of transcription 4 [Source:HGNC Symbol;Acc:HGNC:11365]	0.00172985	-0.328287	0.167	0.249	1	Naive T	All other cells	ND1_7.Neftel_2019_10x Lymphocytes	0.639192	0.926432	0.1	1000
SUMO3	small ubiquitin like modifier 3 [Source:HGNC Symbol;Acc:HGNC:11124]	0.00173057	-0.265466	0.224	0.315	1	Naive T	All other cells	ND1_7.Neftel_2019_10x Lymphocytes	0.877783	1.17507	0.1	1000
DENND1B	DENN domain containing 1B [Source:HGNC Symbol;Acc:HGNC:28404]	0.00173597	-0.581737	0.057	0.122	1	Naive T	All other cells	ND1_7.Neftel_2019_10x Lymphocytes	0.179445	0.399968	0.1	1000
YAF2	YY1 associated factor 2 [Source:HGNC Symbol;Acc:HGNC:17363]	0.00173679	-0.385789	0.057	0.111	1	Naive T	All other cells	ND1_7.Neftel_2019_10x Lymphocytes	0.21203	0.358926	0.1	1000
GCHFR	GTP cyclohydrolase I feedback regulator [Source:HGNC Symbol;Acc:HGNC:4194]	0.00175988	-0.345141	0.179	0.26	1	Naive T	All other cells	ND1_7.Neftel_2019_10x Lymphocytes	0.73009	1.07224	0.1	1000
FLOT1	flotillin 1 [Source:HGNC Symbol;Acc:HGNC:3757]	0.00176843	-0.373509	0.104	0.177	1	Naive T	All other cells	ND1_7.Neftel_2019_10x Lymphocytes	0.374371	0.589177	0.1	1000
SLC25A5	solute carrier family 25 member 5 [Source:HGNC Symbol;Acc:HGNC:10991]	0.00177454	-0.289044	0.49	0.559	1	Naive T	All other cells	ND1_7.Neftel_2019_10x Lymphocytes	2.25799	3.04827	0.1	1000
ZFAND2A	zinc finger AN1-type containing 2A [Source:HGNC Symbol;Acc:HGNC:28073]	0.00177484	-0.661922	0.06	0.112	1	Naive T	All other cells	ND1_7.Neftel_2019_10x Lymphocytes	0.264138	0.605887	0.1	1000
ARL6IP1	ADP ribosylation factor like GTPase 6 interacting protein 1 [Source:HGNC Symbol;Acc:HGNC:697]	0.00177868	-0.43711	0.161	0.237	1	Naive T	All other cells	ND1_7.Neftel_2019_10x Lymphocytes	0.531026	0.876971	0.1	1000
VAMP5	vesicle associated membrane protein 5 [Source:HGNC Symbol;Acc:HGNC:12646]	0.00178857	-0.382933	0.194	0.298	1	Naive T	All other cells	ND1_7.Neftel_2019_10x Lymphocytes	0.737312	1.12798	0.1	1000
TCIRG1	T cell immune regulator 1, ATPase H+ transporting V0 subunit a3 [Source:HGNC Symbol;Acc:HGNC:11647]	0.00179036	-0.342149	0.104	0.178	1	Naive T	All other cells	ND1_7.Neftel_2019_10x Lymphocytes	0.411121	0.619643	0.1	1000
ANAPC15	anaphase promoting complex subunit 15 [Source:HGNC Symbol;Acc:HGNC:24531]	0.00181305	-0.330718	0.116	0.178	1	Naive T	All other cells	ND1_7.Neftel_2019_10x Lymphocytes	0.389049	0.58074	0.1	1000
TMEM109	transmembrane protein 109 [Source:HGNC Symbol;Acc:HGNC:28771]	0.00182763	-0.350062	0.143	0.213	1	Naive T	All other cells	ND1_7.Neftel_2019_10x Lymphocytes	0.50017	0.751734	0.1	1000
ARL6IP6	ADP ribosylation factor like GTPase 6 interacting protein 6 [Source:HGNC Symbol;Acc:HGNC:24048]	0.00184368	-0.400938	0.11	0.166	1	Naive T	All other cells	ND1_7.Neftel_2019_10x Lymphocytes	0.336433	0.551692	0.1	1000
DEDD2	death effector domain containing 2 [Source:HGNC Symbol;Acc:HGNC:24450]	0.00184762	-0.398762	0.075	0.137	1	Naive T	All other cells	ND1_7.Neftel_2019_10x Lymphocytes	0.29302	0.485592	0.1	1000
TOR1A	torsin family 1 member A [Source:HGNC Symbol;Acc:HGNC:3098]	0.00186545	-0.352875	0.066	0.126	1	Naive T	All other cells	ND1_7.Neftel_2019_10x Lymphocytes	0.234158	0.375558	0.1	1000
EED	embryonic ectoderm development [Source:HGNC Symbol;Acc:HGNC:3188]	0.00187292	-0.492384	0.051	0.107	1	Naive T	All other cells	ND1_7.Neftel_2019_10x Lymphocytes	0.17247	0.34582	0.1	1000
ARIH2	ariadne RBR E3 ubiquitin protein ligase 2 [Source:HGNC Symbol;Acc:HGNC:690]	0.00188275	-0.394909	0.078	0.15	1	Naive T	All other cells	ND1_7.Neftel_2019_10x Lymphocytes	0.309802	0.508248	0.1	1000
VBP1	VHL binding protein 1 [Source:HGNC Symbol;Acc:HGNC:12662]	0.00191186	-0.338709	0.119	0.198	1	Naive T	All other cells	ND1_7.Neftel_2019_10x Lymphocytes	0.418423	0.627418	0.1	1000
PSMD1	proteasome 26S subunit, non-ATPase 1 [Source:HGNC Symbol;Acc:HGNC:9554]	0.00191483	-0.488615	0.069	0.13	1	Naive T	All other cells	ND1_7.Neftel_2019_10x Lymphocytes	0.207973	0.402014	0.1	1000
IFI27	interferon alpha inducible protein 27 [Source:HGNC Symbol;Acc:HGNC:5397]	0.00193335	-0.90862	0.113	0.176	1	Naive T	All other cells	ND1_7.Neftel_2019_10x Lymphocytes	0.663235	1.79351	0.1	1000
MFSD10	major facilitator superfamily domain containing 10 [Source:HGNC Symbol;Acc:HGNC:16894]	0.00194449	-0.32989	0.143	0.23	1	Naive T	All other cells	ND1_7.Neftel_2019_10x Lymphocytes	0.558989	0.816532	0.1	1000
ATG101	autophagy related 101 [Source:HGNC Symbol;Acc:HGNC:25679]	0.00195034	-0.574687	0.039	0.101	1	Naive T	All other cells	ND1_7.Neftel_2019_10x Lymphocytes	0.13528	0.317993	0.1	1000
VTI1B	vesicle transport through interaction with t-SNAREs 1B [Source:HGNC Symbol;Acc:HGNC:17793]	0.00196476	-0.383034	0.104	0.171	1	Naive T	All other cells	ND1_7.Neftel_2019_10x Lymphocytes	0.352288	0.563383	0.1	1000
PTP4A2	protein tyrosine phosphatase 4A2 [Source:HGNC Symbol;Acc:HGNC:9635]	0.00198317	-0.318537	0.319	0.416	1	Naive T	All other cells	ND1_7.Neftel_2019_10x Lymphocytes	1.216	1.70964	0.1	1000
MTF2	metal response element binding transcription factor 2 [Source:HGNC Symbol;Acc:HGNC:29535]	0.00199171	-0.422828	0.066	0.134	1	Naive T	All other cells	ND1_7.Neftel_2019_10x Lymphocytes	0.229612	0.403077	0.1	1000
IFITM3	interferon induced transmembrane protein 3 [Source:HGNC Symbol;Acc:HGNC:5414]	0.00200273	-0.429298	0.093	0.146	1	Naive T	All other cells	ND1_7.Neftel_2019_10x Lymphocytes	0.337828	0.572582	0.1	1000
UQCRC2	ubiquinol-cytochrome c reductase core protein 2 [Source:HGNC Symbol;Acc:HGNC:12586]	0.0020036	-0.348813	0.221	0.316	1	Naive T	All other cells	ND1_7.Neftel_2019_10x Lymphocytes	0.76832	1.13074	0.1	1000
WSB1	WD repeat and SOCS box containing 1 [Source:HGNC Symbol;Acc:HGNC:19221]	0.00200495	-0.407246	0.17	0.257	1	Naive T	All other cells	ND1_7.Neftel_2019_10x Lymphocytes	0.623866	0.987734	0.1	1000
SIVA1	SIVA1 apoptosis inducing factor [Source:HGNC Symbol;Acc:HGNC:17712]	0.00200807	-0.316075	0.275	0.375	1	Naive T	All other cells	ND1_7.Neftel_2019_10x Lymphocytes	1.00243	1.41224	0.1	1000
XRN1	5'-3' exoribonuclease 1 [Source:HGNC Symbol;Acc:HGNC:30654]	0.00201356	-0.489583	0.072	0.137	1	Naive T	All other cells	ND1_7.Neftel_2019_10x Lymphocytes	0.244345	0.461846	0.1	1000
POLR2H	RNA polymerase II, I and III subunit H [Source:HGNC Symbol;Acc:HGNC:9195]	0.0020171	-0.370582	0.075	0.14	1	Naive T	All other cells	ND1_7.Neftel_2019_10x Lymphocytes	0.254365	0.413325	0.1	1000
MAP4K1	mitogen-activated protein kinase kinase kinase kinase 1 [Source:HGNC Symbol;Acc:HGNC:6863]	0.00203783	-0.448767	0.107	0.191	1	Naive T	All other cells	ND1_7.Neftel_2019_10x Lymphocytes	0.376597	0.646531	0.1	1000
MYO1F	myosin IF [Source:HGNC Symbol;Acc:HGNC:7600]	0.00205699	-0.355729	0.218	0.291	1	Naive T	All other cells	ND1_7.Neftel_2019_10x Lymphocytes	0.737847	1.09579	0.1	1000
GPRIN3	GPRIN family member 3 [Source:HGNC Symbol;Acc:HGNC:27733]	0.00205927	-0.444069	0.072	0.131	1	Naive T	All other cells	ND1_7.Neftel_2019_10x Lymphocytes	0.268462	0.474446	0.1	1000
ATP6AP1	ATPase H+ transporting accessory protein 1 [Source:HGNC Symbol;Acc:HGNC:868]	0.00208034	-0.405693	0.072	0.142	1	Naive T	All other cells	ND1_7.Neftel_2019_10x Lymphocytes	0.267884	0.451952	0.1	1000
SURF2	surfeit 2 [Source:HGNC Symbol;Acc:HGNC:11475]	0.0020805	-0.439312	0.075	0.141	1	Naive T	All other cells	ND1_7.Neftel_2019_10x Lymphocytes	0.24389	0.433593	0.1	1000
TADA3	transcriptional adaptor 3 [Source:HGNC Symbol;Acc:HGNC:19422]	0.00211506	-0.452684	0.116	0.196	1	Naive T	All other cells	ND1_7.Neftel_2019_10x Lymphocytes	0.362473	0.627251	0.1	1000
SLFN5	schlafen family member 5 [Source:HGNC Symbol;Acc:HGNC:28286]	0.00214297	-0.315754	0.251	0.338	1	Naive T	All other cells	ND1_7.Neftel_2019_10x Lymphocytes	0.936288	1.32105	0.1	1000
MKNK1	MAPK interacting serine/threonine kinase 1 [Source:HGNC Symbol;Acc:HGNC:7110]	0.00214902	-0.508679	0.051	0.107	1	Naive T	All other cells	ND1_7.Neftel_2019_10x Lymphocytes	0.154239	0.322823	0.1	1000
GLRX3	glutaredoxin 3 [Source:HGNC Symbol;Acc:HGNC:15987]	0.00215558	-0.363911	0.101	0.181	1	Naive T	All other cells	ND1_7.Neftel_2019_10x Lymphocytes	0.34675	0.542849	0.1	1000
ARF4	ADP ribosylation factor 4 [Source:HGNC Symbol;Acc:HGNC:655]	0.00216184	-0.360187	0.17	0.253	1	Naive T	All other cells	ND1_7.Neftel_2019_10x Lymphocytes	0.607577	0.914381	0.1	1000
HACD4	3-hydroxyacyl-CoA dehydratase 4 [Source:HGNC Symbol;Acc:HGNC:20920]	0.00216845	-0.324502	0.075	0.131	1	Naive T	All other cells	ND1_7.Neftel_2019_10x Lymphocytes	0.3022	0.45638	0.1	1000
PDCD6	programmed cell death 6 [Source:HGNC Symbol;Acc:HGNC:8765]	0.0021961	-0.420459	0.218	0.329	1	Naive T	All other cells	ND1_7.Neftel_2019_10x Lymphocytes	0.747342	1.19021	0.1	1000
SPPL2A	signal peptide peptidase like 2A [Source:HGNC Symbol;Acc:HGNC:30227]	0.00221765	-0.376808	0.107	0.185	1	Naive T	All other cells	ND1_7.Neftel_2019_10x Lymphocytes	0.383945	0.60541	0.1	1000
CD2BP2	CD2 cytoplasmic tail binding protein 2 [Source:HGNC Symbol;Acc:HGNC:1656]	0.00222425	-0.417704	0.107	0.192	1	Naive T	All other cells	ND1_7.Neftel_2019_10x Lymphocytes	0.376688	0.623837	0.1	1000
CAND1	cullin associated and neddylation dissociated 1 [Source:HGNC Symbol;Acc:HGNC:30688]	0.00224392	-0.35916	0.078	0.13	1	Naive T	All other cells	ND1_7.Neftel_2019_10x Lymphocytes	0.250274	0.401637	0.1	1000
SDHA	succinate dehydrogenase complex flavoprotein subunit A [Source:HGNC Symbol;Acc:HGNC:10680]	0.00225993	-0.404577	0.11	0.184	1	Naive T	All other cells	ND1_7.Neftel_2019_10x Lymphocytes	0.37017	0.60463	0.1	1000
NINJ2	ninjurin 2 [Source:HGNC Symbol;Acc:HGNC:7825]	0.00227294	-0.508105	0.051	0.112	1	Naive T	All other cells	ND1_7.Neftel_2019_10x Lymphocytes	0.187244	0.37744	0.1	1000
LRBA	LPS responsive beige-like anchor protein [Source:HGNC Symbol;Acc:HGNC:1742]	0.00227483	-0.336614	0.06	0.113	1	Naive T	All other cells	ND1_7.Neftel_2019_10x Lymphocytes	0.244769	0.382745	0.1	1000
SMS	spermine synthase [Source:HGNC Symbol;Acc:HGNC:11123]	0.00228713	-0.397897	0.131	0.21	1	Naive T	All other cells	ND1_7.Neftel_2019_10x Lymphocytes	0.438791	0.702093	0.1	1000
PDHB	pyruvate dehydrogenase E1 subunit beta [Source:HGNC Symbol;Acc:HGNC:8808]	0.00230576	-0.427457	0.122	0.207	1	Naive T	All other cells	ND1_7.Neftel_2019_10x Lymphocytes	0.39879	0.664821	0.1	1000
ECI2	enoyl-CoA delta isomerase 2 [Source:HGNC Symbol;Acc:HGNC:14601]	0.00231416	-0.487195	0.084	0.152	1	Naive T	All other cells	ND1_7.Neftel_2019_10x Lymphocytes	0.271019	0.503925	0.1	1000
DDRGK1	DDRGK domain containing 1 [Source:HGNC Symbol;Acc:HGNC:16110]	0.00232882	-0.382992	0.122	0.189	1	Naive T	All other cells	ND1_7.Neftel_2019_10x Lymphocytes	0.396323	0.627941	0.1	1000
INPP5D	inositol polyphosphate-5-phosphatase D [Source:HGNC Symbol;Acc:HGNC:6079]	0.00236542	-0.396201	0.096	0.175	1	Naive T	All other cells	ND1_7.Neftel_2019_10x Lymphocytes	0.356724	0.578768	0.1	1000
HIF1A	hypoxia inducible factor 1 subunit alpha [Source:HGNC Symbol;Acc:HGNC:4910]	0.00237904	-0.54307	0.104	0.174	1	Naive T	All other cells	ND1_7.Neftel_2019_10x Lymphocytes	0.332578	0.64459	0.1	1000
MRPL22	mitochondrial ribosomal protein L22 [Source:HGNC Symbol;Acc:HGNC:14480]	0.0023916	-0.400919	0.113	0.189	1	Naive T	All other cells	ND1_7.Neftel_2019_10x Lymphocytes	0.375266	0.609666	0.1	1000
REST	RE1 silencing transcription factor [Source:HGNC Symbol;Acc:HGNC:9966]	0.00239585	-0.294954	0.119	0.185	1	Naive T	All other cells	ND1_7.Neftel_2019_10x Lymphocytes	0.420753	0.599404	0.1	1000
NIPBL	NIPBL cohesin loading factor [Source:HGNC Symbol;Acc:HGNC:28862]	0.00240858	-0.451688	0.096	0.157	1	Naive T	All other cells	ND1_7.Neftel_2019_10x Lymphocytes	0.306091	0.537953	0.1	1000
RASSF5	Ras association domain family member 5 [Source:HGNC Symbol;Acc:HGNC:17609]	0.00241993	-0.301602	0.23	0.33	1	Naive T	All other cells	ND1_7.Neftel_2019_10x Lymphocytes	0.864928	1.20461	0.1	1000
ARFGAP2	ADP ribosylation factor GTPase activating protein 2 [Source:HGNC Symbol;Acc:HGNC:13504]	0.00242972	-0.454896	0.063	0.122	1	Naive T	All other cells	ND1_7.Neftel_2019_10x Lymphocytes	0.21753	0.400431	0.1	1000
GNB2	G protein subunit beta 2 [Source:HGNC Symbol;Acc:HGNC:4398]	0.00243984	-0.293945	0.263	0.359	1	Naive T	All other cells	ND1_7.Neftel_2019_10x Lymphocytes	1.01564	1.39687	0.1	1000
CHD9	chromodomain helicase DNA binding protein 9 [Source:HGNC Symbol;Acc:HGNC:25701]	0.00244723	-0.429533	0.081	0.148	1	Naive T	All other cells	ND1_7.Neftel_2019_10x Lymphocytes	0.273028	0.473172	0.1	1000
TMEM179B	transmembrane protein 179B [Source:HGNC Symbol;Acc:HGNC:33744]	0.00245244	-0.322073	0.167	0.253	1	Naive T	All other cells	ND1_7.Neftel_2019_10x Lymphocytes	0.594644	0.858599	0.1	1000
CTLA4	cytotoxic T-lymphocyte associated protein 4 [Source:HGNC Symbol;Acc:HGNC:2505]	0.00246782	-0.50523	0.075	0.141	1	Naive T	All other cells	ND1_7.Neftel_2019_10x Lymphocytes	0.384148	0.702411	0.1	1000
RWDD4	RWD domain containing 4 [Source:HGNC Symbol;Acc:HGNC:23750]	0.00246831	-0.421429	0.054	0.109	1	Naive T	All other cells	ND1_7.Neftel_2019_10x Lymphocytes	0.182874	0.33114	0.1	1000
LSM12	LSM12 homolog [Source:HGNC Symbol;Acc:HGNC:26407]	0.00250795	-0.369575	0.063	0.113	1	Naive T	All other cells	ND1_7.Neftel_2019_10x Lymphocytes	0.204301	0.34036	0.1	1000
SUMO1	small ubiquitin like modifier 1 [Source:HGNC Symbol;Acc:HGNC:12502]	0.00252189	-0.279733	0.373	0.467	1	Naive T	All other cells	ND1_7.Neftel_2019_10x Lymphocytes	1.41392	1.90257	0.1	1000
SMIM10L1	small integral membrane protein 10 like 1 [Source:HGNC Symbol;Acc:HGNC:49847]	0.00252933	-0.392465	0.06	0.119	1	Naive T	All other cells	ND1_7.Neftel_2019_10x Lymphocytes	0.232748	0.392676	0.1	1000
ADH5	alcohol dehydrogenase 5 (class III), chi polypeptide [Source:HGNC Symbol;Acc:HGNC:253]	0.00253186	-0.302351	0.164	0.248	1	Naive T	All other cells	ND1_7.Neftel_2019_10x Lymphocytes	0.568342	0.804292	0.1	1000
DNPH1	2'-deoxynucleoside 5'-phosphate N-hydrolase 1 [Source:HGNC Symbol;Acc:HGNC:21218]	0.00253986	-0.349472	0.143	0.22	1	Naive T	All other cells	ND1_7.Neftel_2019_10x Lymphocytes	0.498959	0.749515	0.1	1000
VPS25	vacuolar protein sorting 25 homolog [Source:HGNC Symbol;Acc:HGNC:28122]	0.00253993	-0.354168	0.066	0.12	1	Naive T	All other cells	ND1_7.Neftel_2019_10x Lymphocytes	0.212622	0.345485	0.1	1000
GABARAPL1	GABA type A receptor associated protein like 1 [Source:HGNC Symbol;Acc:HGNC:4068]	0.00260397	-0.490912	0.075	0.138	1	Naive T	All other cells	ND1_7.Neftel_2019_10x Lymphocytes	0.29121	0.539161	0.1	1000
MRPS36	mitochondrial ribosomal protein S36 [Source:HGNC Symbol;Acc:HGNC:16631]	0.00263532	-0.356441	0.134	0.224	1	Naive T	All other cells	ND1_7.Neftel_2019_10x Lymphocytes	0.495236	0.750139	0.1	1000
MICU2	mitochondrial calcium uptake 2 [Source:HGNC Symbol;Acc:HGNC:31830]	0.00268544	-0.319648	0.093	0.15	1	Naive T	All other cells	ND1_7.Neftel_2019_10x Lymphocytes	0.32035	0.478672	0.1	1000
EIF4E2	eukaryotic translation initiation factor 4E family member 2 [Source:HGNC Symbol;Acc:HGNC:3293]	0.00270999	-0.406074	0.107	0.191	1	Naive T	All other cells	ND1_7.Neftel_2019_10x Lymphocytes	0.385864	0.62924	0.1	1000
PDHA1	pyruvate dehydrogenase E1 subunit alpha 1 [Source:HGNC Symbol;Acc:HGNC:8806]	0.00271071	-0.551229	0.054	0.122	1	Naive T	All other cells	ND1_7.Neftel_2019_10x Lymphocytes	0.166241	0.36203	0.1	1000
MAPKAPK3	MAPK activated protein kinase 3 [Source:HGNC Symbol;Acc:HGNC:6888]	0.00276313	-0.325685	0.099	0.171	1	Naive T	All other cells	ND1_7.Neftel_2019_10x Lymphocytes	0.35913	0.535885	0.1	1000
ASCC3	activating signal cointegrator 1 complex subunit 3 [Source:HGNC Symbol;Acc:HGNC:18697]	0.00276503	-0.434428	0.057	0.109	1	Naive T	All other cells	ND1_7.Neftel_2019_10x Lymphocytes	0.186818	0.342869	0.1	1000
NPDC1	neural proliferation, differentiation and control 1 [Source:HGNC Symbol;Acc:HGNC:7899]	0.00279806	0.506086	0.113	0.062	1	Naive T	All other cells	ND1_7.Neftel_2019_10x Lymphocytes	0.379797	0.189246	0.1	1000
SLA	Src like adaptor [Source:HGNC Symbol;Acc:HGNC:10902]	0.00280619	-0.388739	0.299	0.399	1	Naive T	All other cells	ND1_7.Neftel_2019_10x Lymphocytes	1.26993	1.9208	0.1	1000
MRPL4	mitochondrial ribosomal protein L4 [Source:HGNC Symbol;Acc:HGNC:14276]	0.0028467	-0.336844	0.119	0.185	1	Naive T	All other cells	ND1_7.Neftel_2019_10x Lymphocytes	0.376533	0.567394	0.1	1000
NDUFS3	NADH:ubiquinone oxidoreductase core subunit S3 [Source:HGNC Symbol;Acc:HGNC:7710]	0.00284731	-0.42036	0.149	0.233	1	Naive T	All other cells	ND1_7.Neftel_2019_10x Lymphocytes	0.473768	0.773568	0.1	1000
BAZ1B	bromodomain adjacent to zinc finger domain 1B [Source:HGNC Symbol;Acc:HGNC:961]	0.00285197	-0.474541	0.072	0.129	1	Naive T	All other cells	ND1_7.Neftel_2019_10x Lymphocytes	0.218173	0.411392	0.1	1000
LSM6	LSM6 homolog, U6 small nuclear RNA and mRNA degradation associated [Source:HGNC Symbol;Acc:HGNC:17017]	0.00287489	-0.260716	0.242	0.332	1	Naive T	All other cells	ND1_7.Neftel_2019_10x Lymphocytes	0.886152	1.17989	0.1	1000
SF3A1	splicing factor 3a subunit 1 [Source:HGNC Symbol;Acc:HGNC:10765]	0.00294405	-0.262656	0.081	0.132	1	Naive T	All other cells	ND1_7.Neftel_2019_10x Lymphocytes	0.309087	0.431968	0.1	1000
ZFAND6	zinc finger AN1-type containing 6 [Source:HGNC Symbol;Acc:HGNC:30164]	0.00294566	-0.466348	0.158	0.241	1	Naive T	All other cells	ND1_7.Neftel_2019_10x Lymphocytes	0.489316	0.839465	0.1	1000
SAP30BP	SAP30 binding protein [Source:HGNC Symbol;Acc:HGNC:30785]	0.00296592	-0.394895	0.122	0.198	1	Naive T	All other cells	ND1_7.Neftel_2019_10x Lymphocytes	0.402496	0.64582	0.1	1000
P2RY8	P2Y receptor family member 8 [Source:HGNC Symbol;Acc:HGNC:15524]	0.0029721	0.290321	0.143	0.102	1	Naive T	All other cells	ND1_7.Neftel_2019_10x Lymphocytes	0.536601	0.376193	0.1	1000
HPRT1	hypoxanthine phosphoribosyltransferase 1 [Source:HGNC Symbol;Acc:HGNC:5157]	0.00299	-0.369077	0.14	0.217	1	Naive T	All other cells	ND1_7.Neftel_2019_10x Lymphocytes	0.460139	0.710185	0.1	1000
MRPS14	mitochondrial ribosomal protein S14 [Source:HGNC Symbol;Acc:HGNC:14049]	0.00299256	-0.375155	0.096	0.164	1	Naive T	All other cells	ND1_7.Neftel_2019_10x Lymphocytes	0.30749	0.492986	0.1	1000
LSM8	LSM8 homolog, U6 small nuclear RNA associated [Source:HGNC Symbol;Acc:HGNC:20471]	0.0029944	-0.303212	0.257	0.361	1	Naive T	All other cells	ND1_7.Neftel_2019_10x Lymphocytes	1.02477	1.42317	0.1	1000
PSMC5	proteasome 26S subunit, ATPase 5 [Source:HGNC Symbol;Acc:HGNC:9552]	0.00302612	-0.324118	0.278	0.364	1	Naive T	All other cells	ND1_7.Neftel_2019_10x Lymphocytes	0.976681	1.38885	0.1	1000
ZRSR2	zinc finger CCCH-type, RNA binding motif and serine/arginine rich 2 [Source:HGNC Symbol;Acc:HGNC:23019]	0.00303268	-0.487246	0.063	0.119	1	Naive T	All other cells	ND1_7.Neftel_2019_10x Lymphocytes	0.196579	0.382779	0.1	1000
MTHFD2	methylenetetrahydrofolate dehydrogenase (NADP+ dependent) 2, methenyltetrahydrofolate cyclohydrolase [Source:HGNC Symbol;Acc:HGNC:7434]	0.00303762	-0.28139	0.119	0.185	1	Naive T	All other cells	ND1_7.Neftel_2019_10x Lymphocytes	0.464948	0.648539	0.1	1000
TMEM106C	transmembrane protein 106C [Source:HGNC Symbol;Acc:HGNC:28775]	0.00304412	-0.408639	0.051	0.105	1	Naive T	All other cells	ND1_7.Neftel_2019_10x Lymphocytes	0.19489	0.343742	0.1	1000
DPM2	dolichyl-phosphate mannosyltransferase subunit 2, regulatory [Source:HGNC Symbol;Acc:HGNC:3006]	0.00306128	-0.37344	0.06	0.119	1	Naive T	All other cells	ND1_7.Neftel_2019_10x Lymphocytes	0.213582	0.355548	0.1	1000
NUDT16L1	nudix hydrolase 16 like 1 [Source:HGNC Symbol;Acc:HGNC:28154]	0.00307042	-0.381477	0.119	0.185	1	Naive T	All other cells	ND1_7.Neftel_2019_10x Lymphocytes	0.400029	0.632265	0.1	1000
TFPT	TCF3 fusion partner [Source:HGNC Symbol;Acc:HGNC:13630]	0.00311991	-0.419308	0.081	0.146	1	Naive T	All other cells	ND1_7.Neftel_2019_10x Lymphocytes	0.274092	0.468959	0.1	1000
ZNF644	zinc finger protein 644 [Source:HGNC Symbol;Acc:HGNC:29222]	0.00312583	-0.327057	0.069	0.137	1	Naive T	All other cells	ND1_7.Neftel_2019_10x Lymphocytes	0.30553	0.462422	0.1	1000
MRPS18A	mitochondrial ribosomal protein S18A [Source:HGNC Symbol;Acc:HGNC:14515]	0.00323426	-0.346754	0.066	0.118	1	Naive T	All other cells	ND1_7.Neftel_2019_10x Lymphocytes	0.237081	0.37679	0.1	1000
CCNDBP1	cyclin D1 binding protein 1 [Source:HGNC Symbol;Acc:HGNC:1587]	0.00325743	-0.389574	0.203	0.297	1	Naive T	All other cells	ND1_7.Neftel_2019_10x Lymphocytes	0.689771	1.06598	0.1	1000
IER3	immediate early response 3 [Source:HGNC Symbol;Acc:HGNC:5392]	0.00328221	-0.40817	0.075	0.125	1	Naive T	All other cells	ND1_7.Neftel_2019_10x Lymphocytes	0.237954	0.408305	0.1	1000
DCPS	decapping enzyme, scavenger [Source:HGNC Symbol;Acc:HGNC:29812]	0.00331619	-0.506367	0.057	0.122	1	Naive T	All other cells	ND1_7.Neftel_2019_10x Lymphocytes	0.183859	0.370993	0.1	1000
NOP58	NOP58 ribonucleoprotein [Source:HGNC Symbol;Acc:HGNC:29926]	0.00332072	-0.275748	0.167	0.256	1	Naive T	All other cells	ND1_7.Neftel_2019_10x Lymphocytes	0.67982	0.927425	0.1	1000
TMEM87A	transmembrane protein 87A [Source:HGNC Symbol;Acc:HGNC:24522]	0.003356	-0.526786	0.063	0.119	1	Naive T	All other cells	ND1_7.Neftel_2019_10x Lymphocytes	0.192524	0.395385	0.1	1000
EXOSC9	exosome component 9 [Source:HGNC Symbol;Acc:HGNC:9137]	0.00337711	-0.460526	0.06	0.115	1	Naive T	All other cells	ND1_7.Neftel_2019_10x Lymphocytes	0.189914	0.359487	0.1	1000
RABIF	RAB interacting factor [Source:HGNC Symbol;Acc:HGNC:9797]	0.00338271	-0.445503	0.063	0.126	1	Naive T	All other cells	ND1_7.Neftel_2019_10x Lymphocytes	0.225461	0.408134	0.1	1000
PRPF40A	pre-mRNA processing factor 40 homolog A [Source:HGNC Symbol;Acc:HGNC:16463]	0.00341326	-0.260086	0.191	0.279	1	Naive T	All other cells	ND1_7.Neftel_2019_10x Lymphocytes	0.731229	0.978139	0.1	1000
AATF	apoptosis antagonizing transcription factor [Source:HGNC Symbol;Acc:HGNC:19235]	0.00341438	-0.3698	0.119	0.183	1	Naive T	All other cells	ND1_7.Neftel_2019_10x Lymphocytes	0.373572	0.585469	0.1	1000
GLRX	glutaredoxin [Source:HGNC Symbol;Acc:HGNC:4330]	0.00346119	-0.454788	0.245	0.313	1	Naive T	All other cells	ND1_7.Neftel_2019_10x Lymphocytes	0.776702	1.28154	0.1	1000
TIMM17B	translocase of inner mitochondrial membrane 17B [Source:HGNC Symbol;Acc:HGNC:17310]	0.00353416	-0.257202	0.119	0.177	1	Naive T	All other cells	ND1_7.Neftel_2019_10x Lymphocytes	0.423122	0.576557	0.1	1000
NQO2	N-ribosyldihydronicotinamide:quinone reductase 2 [Source:HGNC Symbol;Acc:HGNC:7856]	0.00354636	-0.50277	0.048	0.103	1	Naive T	All other cells	ND1_7.Neftel_2019_10x Lymphocytes	0.147017	0.308392	0.1	1000
MYCBP2	MYC binding protein 2 [Source:HGNC Symbol;Acc:HGNC:23386]	0.00356117	-0.367664	0.155	0.237	1	Naive T	All other cells	ND1_7.Neftel_2019_10x Lymphocytes	0.553977	0.844576	0.1	1000
COX17	cytochrome c oxidase copper chaperone COX17 [Source:HGNC Symbol;Acc:HGNC:2264]	0.00358622	-0.36801	0.26	0.357	1	Naive T	All other cells	ND1_7.Neftel_2019_10x Lymphocytes	0.943153	1.40721	0.1	1000
GRAP2	GRB2 related adaptor protein 2 [Source:HGNC Symbol;Acc:HGNC:4563]	0.00363423	-0.349051	0.134	0.2	1	Naive T	All other cells	ND1_7.Neftel_2019_10x Lymphocytes	0.46828	0.705663	0.1	1000
HNRNPAB	heterogeneous nuclear ribonucleoprotein A/B [Source:HGNC Symbol;Acc:HGNC:5034]	0.00363428	-0.399004	0.101	0.171	1	Naive T	All other cells	ND1_7.Neftel_2019_10x Lymphocytes	0.33696	0.551219	0.1	1000
PDE4D	phosphodiesterase 4D [Source:HGNC Symbol;Acc:HGNC:8783]	0.00367187	-0.460972	0.093	0.159	1	Naive T	All other cells	ND1_7.Neftel_2019_10x Lymphocytes	0.33481	0.58944	0.1	1000
TPP1	tripeptidyl peptidase 1 [Source:HGNC Symbol;Acc:HGNC:2073]	0.00367987	-0.661112	0.075	0.144	1	Naive T	All other cells	ND1_7.Neftel_2019_10x Lymphocytes	0.207951	0.496484	0.1	1000
MAT2A	methionine adenosyltransferase 2A [Source:HGNC Symbol;Acc:HGNC:6904]	0.00368606	-0.380083	0.101	0.173	1	Naive T	All other cells	ND1_7.Neftel_2019_10x Lymphocytes	0.362596	0.576504	0.1	1000
PLEKHA2	pleckstrin homology domain containing A2 [Source:HGNC Symbol;Acc:HGNC:14336]	0.00371364	-0.441108	0.06	0.116	1	Naive T	All other cells	ND1_7.Neftel_2019_10x Lymphocytes	0.20587	0.375454	0.1	1000
TERF1	telomeric repeat binding factor 1 [Source:HGNC Symbol;Acc:HGNC:11728]	0.00371732	-0.463516	0.072	0.137	1	Naive T	All other cells	ND1_7.Neftel_2019_10x Lymphocytes	0.247263	0.452027	0.1	1000
KIF5B	kinesin family member 5B [Source:HGNC Symbol;Acc:HGNC:6324]	0.00374785	-0.33253	0.2	0.287	1	Naive T	All other cells	ND1_7.Neftel_2019_10x Lymphocytes	0.713317	1.03416	0.1	1000
ZNF511	zinc finger protein 511 [Source:HGNC Symbol;Acc:HGNC:28445]	0.00375544	-0.48993	0.084	0.152	1	Naive T	All other cells	ND1_7.Neftel_2019_10x Lymphocytes	0.260838	0.488961	0.1	1000
HSH2D	hematopoietic SH2 domain containing [Source:HGNC Symbol;Acc:HGNC:24920]	0.0037731	-0.303035	0.06	0.109	1	Naive T	All other cells	ND1_7.Neftel_2019_10x Lymphocytes	0.251257	0.375588	0.1	1000
UNC50	unc-50 inner nuclear membrane RNA binding protein [Source:HGNC Symbol;Acc:HGNC:16046]	0.00378116	-0.422305	0.042	0.103	1	Naive T	All other cells	ND1_7.Neftel_2019_10x Lymphocytes	0.179708	0.326687	0.1	1000
PTP4A1	protein tyrosine phosphatase 4A1 [Source:HGNC Symbol;Acc:HGNC:9634]	0.00378479	-0.356422	0.099	0.163	1	Naive T	All other cells	ND1_7.Neftel_2019_10x Lymphocytes	0.361703	0.559409	0.1	1000
ZC3H12A	zinc finger CCCH-type containing 12A [Source:HGNC Symbol;Acc:HGNC:26259]	0.00379017	-0.53321	0.057	0.108	1	Naive T	All other cells	ND1_7.Neftel_2019_10x Lymphocytes	0.212871	0.433256	0.1	1000
LTA4H	leukotriene A4 hydrolase [Source:HGNC Symbol;Acc:HGNC:6710]	0.00379733	0.417304	0.152	0.093	1	Naive T	All other cells	ND1_7.Neftel_2019_10x Lymphocytes	0.484345	0.284979	0.1	1000
STARD3	StAR related lipid transfer domain containing 3 [Source:HGNC Symbol;Acc:HGNC:17579]	0.00381594	-0.576112	0.066	0.131	1	Naive T	All other cells	ND1_7.Neftel_2019_10x Lymphocytes	0.20791	0.447806	0.1	1000
POP4	POP4 homolog, ribonuclease P/MRP subunit [Source:HGNC Symbol;Acc:HGNC:30081]	0.00381668	-0.291196	0.084	0.147	1	Naive T	All other cells	ND1_7.Neftel_2019_10x Lymphocytes	0.322147	0.464844	0.1	1000
FOSL2	FOS like 2, AP-1 transcription factor subunit [Source:HGNC Symbol;Acc:HGNC:3798]	0.00381964	-0.299046	0.063	0.116	1	Naive T	All other cells	ND1_7.Neftel_2019_10x Lymphocytes	0.267721	0.395898	0.1	1000
LYPLA2	lysophospholipase 2 [Source:HGNC Symbol;Acc:HGNC:6738]	0.00383572	-0.355803	0.107	0.173	1	Naive T	All other cells	ND1_7.Neftel_2019_10x Lymphocytes	0.354431	0.548622	0.1	1000
CCL4L2	C-C motif chemokine ligand 4 like 2 [Source:HGNC Symbol;Acc:HGNC:24066]	0.00386619	-1.56995	0.391	0.442	1	Naive T	All other cells	ND1_7.Neftel_2019_10x Lymphocytes	2.68946	13.3072	0.1	1000
C1orf43	chromosome 1 open reading frame 43 [Source:HGNC Symbol;Acc:HGNC:29876]	0.00390984	-0.31543	0.221	0.302	1	Naive T	All other cells	ND1_7.Neftel_2019_10x Lymphocytes	0.769129	1.09144	0.1	1000
NUDT1	nudix hydrolase 1 [Source:HGNC Symbol;Acc:HGNC:8048]	0.00392268	-0.414091	0.125	0.196	1	Naive T	All other cells	ND1_7.Neftel_2019_10x Lymphocytes	0.442282	0.72047	0.1	1000
SLC3A2	solute carrier family 3 member 2 [Source:HGNC Symbol;Acc:HGNC:11026]	0.00394245	-0.361847	0.206	0.285	1	Naive T	All other cells	ND1_7.Neftel_2019_10x Lymphocytes	0.698955	1.04728	0.1	1000
CERS2	ceramide synthase 2 [Source:HGNC Symbol;Acc:HGNC:14076]	0.00394595	-0.413304	0.057	0.114	1	Naive T	All other cells	ND1_7.Neftel_2019_10x Lymphocytes	0.195559	0.346828	0.1	1000
IFNGR1	interferon gamma receptor 1 [Source:HGNC Symbol;Acc:HGNC:5439]	0.00396743	-0.298612	0.158	0.231	1	Naive T	All other cells	ND1_7.Neftel_2019_10x Lymphocytes	0.624924	0.877188	0.1	1000
TRG-AS1	T cell receptor gamma locus antisense RNA 1 [Source:HGNC Symbol;Acc:HGNC:48974]	0.00397824	-0.401072	0.078	0.135	1	Naive T	All other cells	ND1_7.Neftel_2019_10x Lymphocytes	0.27433	0.459033	0.1	1000
RTCB	RNA 2',3'-cyclic phosphate and 5'-OH ligase [Source:HGNC Symbol;Acc:HGNC:26935]	0.0040026	-0.410144	0.084	0.147	1	Naive T	All other cells	ND1_7.Neftel_2019_10x Lymphocytes	0.277739	0.469266	0.1	1000
MTMR14	myotubularin related protein 14 [Source:HGNC Symbol;Acc:HGNC:26190]	0.0040343	-0.359577	0.06	0.107	1	Naive T	All other cells	ND1_7.Neftel_2019_10x Lymphocytes	0.183781	0.306579	0.1	1000
CHCHD5	coiled-coil-helix-coiled-coil-helix domain containing 5 [Source:HGNC Symbol;Acc:HGNC:17840]	0.00407315	-0.360113	0.155	0.241	1	Naive T	All other cells	ND1_7.Neftel_2019_10x Lymphocytes	0.565799	0.854417	0.1	1000
PITPNC1	phosphatidylinositol transfer protein cytoplasmic 1 [Source:HGNC Symbol;Acc:HGNC:21045]	0.00408608	-0.342745	0.113	0.174	1	Naive T	All other cells	ND1_7.Neftel_2019_10x Lymphocytes	0.404664	0.610975	0.1	1000
METTL9	methyltransferase like 9 [Source:HGNC Symbol;Acc:HGNC:24586]	0.00408871	-0.261144	0.26	0.344	1	Naive T	All other cells	ND1_7.Neftel_2019_10x Lymphocytes	0.943897	1.25541	0.1	1000
CYCS	cytochrome c, somatic [Source:HGNC Symbol;Acc:HGNC:19986]	0.00410048	-0.256282	0.394	0.489	1	Naive T	All other cells	ND1_7.Neftel_2019_10x Lymphocytes	1.70935	2.23789	0.1	1000
COA5	cytochrome c oxidase assembly factor 5 [Source:HGNC Symbol;Acc:HGNC:33848]	0.00410192	-0.505942	0.072	0.129	1	Naive T	All other cells	ND1_7.Neftel_2019_10x Lymphocytes	0.225009	0.439043	0.1	1000
CD27	CD27 molecule [Source:HGNC Symbol;Acc:HGNC:11922]	0.00411013	-0.340493	0.364	0.416	1	Naive T	All other cells	ND1_7.Neftel_2019_10x Lymphocytes	1.67741	2.3984	0.1	1000
TIAL1	TIA1 cytotoxic granule associated RNA binding protein like 1 [Source:HGNC Symbol;Acc:HGNC:11804]	0.00412176	-0.27097	0.131	0.195	1	Naive T	All other cells	ND1_7.Neftel_2019_10x Lymphocytes	0.48317	0.664673	0.1	1000
CCDC167	coiled-coil domain containing 167 [Source:HGNC Symbol;Acc:HGNC:21239]	0.00418694	-0.335209	0.173	0.25	1	Naive T	All other cells	ND1_7.Neftel_2019_10x Lymphocytes	0.633899	0.926161	0.1	1000
ATP2A3	ATPase sarcoplasmic/endoplasmic reticulum Ca2+ transporting 3 [Source:HGNC Symbol;Acc:HGNC:813]	0.00419324	-0.356834	0.066	0.118	1	Naive T	All other cells	ND1_7.Neftel_2019_10x Lymphocytes	0.248662	0.398168	0.1	1000
CDK12	cyclin dependent kinase 12 [Source:HGNC Symbol;Acc:HGNC:24224]	0.00422465	-0.448189	0.06	0.111	1	Naive T	All other cells	ND1_7.Neftel_2019_10x Lymphocytes	0.200217	0.369983	0.1	1000
SDHAF2	succinate dehydrogenase complex assembly factor 2 [Source:HGNC Symbol;Acc:HGNC:26034]	0.00425059	-0.366448	0.113	0.178	1	Naive T	All other cells	ND1_7.Neftel_2019_10x Lymphocytes	0.36295	0.567852	0.1	1000
EIF4E	eukaryotic translation initiation factor 4E [Source:HGNC Symbol;Acc:HGNC:3287]	0.0042536	-0.347855	0.131	0.205	1	Naive T	All other cells	ND1_7.Neftel_2019_10x Lymphocytes	0.456831	0.688488	0.1	1000
HMG20B	high mobility group 20B [Source:HGNC Symbol;Acc:HGNC:5002]	0.00427238	-0.28042	0.078	0.126	1	Naive T	All other cells	ND1_7.Neftel_2019_10x Lymphocytes	0.272739	0.393389	0.1	1000
UBN1	ubinuclein 1 [Source:HGNC Symbol;Acc:HGNC:12506]	0.00429041	-0.402203	0.06	0.102	1	Naive T	All other cells	ND1_7.Neftel_2019_10x Lymphocytes	0.178179	0.31591	0.1	1000
LDLRAP1	low density lipoprotein receptor adaptor protein 1 [Source:HGNC Symbol;Acc:HGNC:18640]	0.00432196	0.455938	0.137	0.087	1	Naive T	All other cells	ND1_7.Neftel_2019_10x Lymphocytes	0.503504	0.282533	0.1	1000
FUBP1	far upstream element binding protein 1 [Source:HGNC Symbol;Acc:HGNC:4004]	0.00432454	-0.301073	0.113	0.175	1	Naive T	All other cells	ND1_7.Neftel_2019_10x Lymphocytes	0.39381	0.56729	0.1	1000
PIH1D1	PIH1 domain containing 1 [Source:HGNC Symbol;Acc:HGNC:26075]	0.00433975	-0.287125	0.134	0.197	1	Naive T	All other cells	ND1_7.Neftel_2019_10x Lymphocytes	0.464699	0.652513	0.1	1000
TOR1AIP1	torsin 1A interacting protein 1 [Source:HGNC Symbol;Acc:HGNC:29456]	0.00438205	-0.438526	0.063	0.125	1	Naive T	All other cells	ND1_7.Neftel_2019_10x Lymphocytes	0.223481	0.401531	0.1	1000
C6orf62	chromosome 6 open reading frame 62 [Source:HGNC Symbol;Acc:HGNC:20998]	0.00441307	-0.300493	0.113	0.183	1	Naive T	All other cells	ND1_7.Neftel_2019_10x Lymphocytes	0.440092	0.629408	0.1	1000
TPGS1	tubulin polyglutamylase complex subunit 1 [Source:HGNC Symbol;Acc:HGNC:25058]	0.00448465	-0.412607	0.113	0.178	1	Naive T	All other cells	ND1_7.Neftel_2019_10x Lymphocytes	0.350645	0.580813	0.1	1000
MAGED2	MAGE family member D2 [Source:HGNC Symbol;Acc:HGNC:16353]	0.00450896	-0.429792	0.116	0.191	1	Naive T	All other cells	ND1_7.Neftel_2019_10x Lymphocytes	0.391785	0.655843	0.1	1000
PLEKHJ1	pleckstrin homology domain containing J1 [Source:HGNC Symbol;Acc:HGNC:18211]	0.00451064	-0.275492	0.14	0.212	1	Naive T	All other cells	ND1_7.Neftel_2019_10x Lymphocytes	0.528707	0.728119	0.1	1000
PBX4	PBX homeobox 4 [Source:HGNC Symbol;Acc:HGNC:13403]	0.00452214	-0.350243	0.057	0.105	1	Naive T	All other cells	ND1_7.Neftel_2019_10x Lymphocytes	0.225469	0.361974	0.1	1000
SETX	senataxin [Source:HGNC Symbol;Acc:HGNC:445]	0.00452748	-0.37302	0.063	0.116	1	Naive T	All other cells	ND1_7.Neftel_2019_10x Lymphocytes	0.220852	0.365913	0.1	1000
DNAJC9	DnaJ heat shock protein family (Hsp40) member C9 [Source:HGNC Symbol;Acc:HGNC:19123]	0.00461212	-0.413772	0.084	0.15	1	Naive T	All other cells	ND1_7.Neftel_2019_10x Lymphocytes	0.27901	0.473258	0.1	1000
SMU1	SMU1 DNA replication regulator and spliceosomal factor [Source:HGNC Symbol;Acc:HGNC:18247]	0.00463825	-0.485931	0.078	0.132	1	Naive T	All other cells	ND1_7.Neftel_2019_10x Lymphocytes	0.238902	0.45095	0.1	1000
WDR18	WD repeat domain 18 [Source:HGNC Symbol;Acc:HGNC:17956]	0.004647	-0.594318	0.042	0.101	1	Naive T	All other cells	ND1_7.Neftel_2019_10x Lymphocytes	0.119896	0.298407	0.1	1000
RBM42	RNA binding motif protein 42 [Source:HGNC Symbol;Acc:HGNC:28117]	0.00469037	-0.291766	0.113	0.186	1	Naive T	All other cells	ND1_7.Neftel_2019_10x Lymphocytes	0.401004	0.570739	0.1	1000
SLC25A11	solute carrier family 25 member 11 [Source:HGNC Symbol;Acc:HGNC:10981]	0.00470161	-0.26711	0.113	0.177	1	Naive T	All other cells	ND1_7.Neftel_2019_10x Lymphocytes	0.425924	0.586953	0.1	1000
MVP	major vault protein [Source:HGNC Symbol;Acc:HGNC:7531]	0.00470263	-0.30682	0.155	0.231	1	Naive T	All other cells	ND1_7.Neftel_2019_10x Lymphocytes	0.568094	0.808005	0.1	1000
CYB5B	cytochrome b5 type B [Source:HGNC Symbol;Acc:HGNC:24374]	0.00474436	-0.301222	0.104	0.174	1	Naive T	All other cells	ND1_7.Neftel_2019_10x Lymphocytes	0.37914	0.547561	0.1	1000
HPS1	HPS1 biogenesis of lysosomal organelles complex 3 subunit 1 [Source:HGNC Symbol;Acc:HGNC:5163]	0.00474527	-0.265286	0.09	0.16	1	Naive T	All other cells	ND1_7.Neftel_2019_10x Lymphocytes	0.386857	0.534766	0.1	1000
HEXA	hexosaminidase subunit alpha [Source:HGNC Symbol;Acc:HGNC:4878]	0.00478636	-0.453273	0.066	0.116	1	Naive T	All other cells	ND1_7.Neftel_2019_10x Lymphocytes	0.200543	0.372891	0.1	1000
TAF12	TATA-box binding protein associated factor 12 [Source:HGNC Symbol;Acc:HGNC:11545]	0.0047937	-0.370323	0.116	0.19	1	Naive T	All other cells	ND1_7.Neftel_2019_10x Lymphocytes	0.401082	0.625668	0.1	1000
TAOK3	TAO kinase 3 [Source:HGNC Symbol;Acc:HGNC:18133]	0.00479697	-0.279785	0.173	0.24	1	Naive T	All other cells	ND1_7.Neftel_2019_10x Lymphocytes	0.583745	0.804488	0.1	1000
FDFT1	farnesyl-diphosphate farnesyltransferase 1 [Source:NCBI gene (formerly Entrezgene);Acc:2222]	0.0048002	-0.390222	0.113	0.18	1	Naive T	All other cells	ND1_7.Neftel_2019_10x Lymphocytes	0.388025	0.620965	0.1	1000
ETF1	eukaryotic translation termination factor 1 [Source:HGNC Symbol;Acc:HGNC:3477]	0.00489642	-0.330388	0.075	0.138	1	Naive T	All other cells	ND1_7.Neftel_2019_10x Lymphocytes	0.269406	0.414032	0.1	1000
AIMP1	aminoacyl tRNA synthetase complex interacting multifunctional protein 1 [Source:HGNC Symbol;Acc:HGNC:10648]	0.00492383	-0.327312	0.17	0.233	1	Naive T	All other cells	ND1_7.Neftel_2019_10x Lymphocytes	0.536888	0.783512	0.1	1000
IP6K2	inositol hexakisphosphate kinase 2 [Source:HGNC Symbol;Acc:HGNC:17313]	0.00492623	-0.354312	0.09	0.135	1	Naive T	All other cells	ND1_7.Neftel_2019_10x Lymphocytes	0.277145	0.437506	0.1	1000
TCEA1	transcription elongation factor A1 [Source:HGNC Symbol;Acc:HGNC:11612]	0.00494769	-0.271208	0.266	0.361	1	Naive T	All other cells	ND1_7.Neftel_2019_10x Lymphocytes	0.986794	1.32538	0.1	1000
DRG1	developmentally regulated GTP binding protein 1 [Source:HGNC Symbol;Acc:HGNC:3029]	0.0049608	-0.510877	0.048	0.105	1	Naive T	All other cells	ND1_7.Neftel_2019_10x Lymphocytes	0.15455	0.324272	0.1	1000
MRPS18B	mitochondrial ribosomal protein S18B [Source:HGNC Symbol;Acc:HGNC:14516]	0.00500343	-0.303723	0.131	0.193	1	Naive T	All other cells	ND1_7.Neftel_2019_10x Lymphocytes	0.430715	0.619062	0.1	1000
PPT1	palmitoyl-protein thioesterase 1 [Source:HGNC Symbol;Acc:HGNC:9325]	0.00501007	-0.362086	0.14	0.21	1	Naive T	All other cells	ND1_7.Neftel_2019_10x Lymphocytes	0.46025	0.7047	0.1	1000
CIAO1	cytosolic iron-sulfur assembly component 1 [Source:HGNC Symbol;Acc:HGNC:14280]	0.00501527	-0.36756	0.066	0.128	1	Naive T	All other cells	ND1_7.Neftel_2019_10x Lymphocytes	0.247842	0.402355	0.1	1000
ACADM	acyl-CoA dehydrogenase medium chain [Source:HGNC Symbol;Acc:HGNC:89]	0.00504732	-0.35846	0.063	0.116	1	Naive T	All other cells	ND1_7.Neftel_2019_10x Lymphocytes	0.211398	0.345649	0.1	1000
NABP1	nucleic acid binding protein 1 [Source:HGNC Symbol;Acc:HGNC:26232]	0.00505715	-0.32828	0.069	0.122	1	Naive T	All other cells	ND1_7.Neftel_2019_10x Lymphocytes	0.267505	0.41031	0.1	1000
FAM136A	family with sequence similarity 136 member A [Source:HGNC Symbol;Acc:HGNC:25911]	0.00510164	-0.355732	0.051	0.114	1	Naive T	All other cells	ND1_7.Neftel_2019_10x Lymphocytes	0.215072	0.349679	0.1	1000
PPP1R7	protein phosphatase 1 regulatory subunit 7 [Source:HGNC Symbol;Acc:HGNC:9295]	0.00513377	-0.346032	0.185	0.279	1	Naive T	All other cells	ND1_7.Neftel_2019_10x Lymphocytes	0.63806	0.94321	0.1	1000
VMA21	vacuolar ATPase assembly factor VMA21 [Source:HGNC Symbol;Acc:HGNC:22082]	0.00513734	-0.341217	0.101	0.166	1	Naive T	All other cells	ND1_7.Neftel_2019_10x Lymphocytes	0.34213	0.521926	0.1	1000
PRKDC	protein kinase, DNA-activated, catalytic subunit [Source:HGNC Symbol;Acc:HGNC:9413]	0.00515586	-0.279019	0.087	0.151	1	Naive T	All other cells	ND1_7.Neftel_2019_10x Lymphocytes	0.341006	0.482936	0.1	1000
DHX9	DExH-box helicase 9 [Source:HGNC Symbol;Acc:HGNC:2750]	0.00516764	-0.447168	0.069	0.134	1	Naive T	All other cells	ND1_7.Neftel_2019_10x Lymphocytes	0.240816	0.432995	0.1	1000
RNH1	ribonuclease/angiogenin inhibitor 1 [Source:HGNC Symbol;Acc:HGNC:10074]	0.00521806	-0.282914	0.218	0.3	1	Naive T	All other cells	ND1_7.Neftel_2019_10x Lymphocytes	0.752397	1.03112	0.1	1000
SNAP23	synaptosome associated protein 23 [Source:HGNC Symbol;Acc:HGNC:11131]	0.0052516	-0.357432	0.081	0.138	1	Naive T	All other cells	ND1_7.Neftel_2019_10x Lymphocytes	0.29018	0.457822	0.1	1000
UBE2J2	ubiquitin conjugating enzyme E2 J2 [Source:HGNC Symbol;Acc:HGNC:19268]	0.00550026	-0.374084	0.107	0.173	1	Naive T	All other cells	ND1_7.Neftel_2019_10x Lymphocytes	0.339298	0.538589	0.1	1000
SMIM15	small integral membrane protein 15 [Source:HGNC Symbol;Acc:HGNC:33861]	0.00550747	-0.414484	0.072	0.126	1	Naive T	All other cells	ND1_7.Neftel_2019_10x Lymphocytes	0.247116	0.425392	0.1	1000
HMGN3	high mobility group nucleosomal binding domain 3 [Source:HGNC Symbol;Acc:HGNC:12312]	0.0055261	-0.296579	0.263	0.349	1	Naive T	All other cells	ND1_7.Neftel_2019_10x Lymphocytes	0.988552	1.36437	0.1	1000
FMNL1	formin like 1 [Source:HGNC Symbol;Acc:HGNC:1212]	0.00554397	-0.370709	0.164	0.235	1	Naive T	All other cells	ND1_7.Neftel_2019_10x Lymphocytes	0.523986	0.804006	0.1	1000
DUSP23	dual specificity phosphatase 23 [Source:HGNC Symbol;Acc:HGNC:21480]	0.00557146	-0.277065	0.134	0.193	1	Naive T	All other cells	ND1_7.Neftel_2019_10x Lymphocytes	0.435843	0.606912	0.1	1000
UCHL5	ubiquitin C-terminal hydrolase L5 [Source:HGNC Symbol;Acc:HGNC:19678]	0.00560018	-0.350959	0.054	0.101	1	Naive T	All other cells	ND1_7.Neftel_2019_10x Lymphocytes	0.190313	0.312369	0.1	1000
TMEM165	transmembrane protein 165 [Source:HGNC Symbol;Acc:HGNC:30760]	0.00561496	-0.456938	0.134	0.208	1	Naive T	All other cells	ND1_7.Neftel_2019_10x Lymphocytes	0.422852	0.725704	0.1	1000
LAMTOR1	late endosomal/lysosomal adaptor, MAPK and MTOR activator 1 [Source:HGNC Symbol;Acc:HGNC:26068]	0.00563677	-0.292565	0.307	0.384	1	Naive T	All other cells	ND1_7.Neftel_2019_10x Lymphocytes	1.06506	1.46102	0.1	1000
ZC3H15	zinc finger CCCH-type containing 15 [Source:HGNC Symbol;Acc:HGNC:29528]	0.00567465	-0.324519	0.188	0.293	1	Naive T	All other cells	ND1_7.Neftel_2019_10x Lymphocytes	0.723495	1.03919	0.1	1000
DDX27	DEAD-box helicase 27 [Source:HGNC Symbol;Acc:HGNC:15837]	0.00568261	-0.333642	0.107	0.168	1	Naive T	All other cells	ND1_7.Neftel_2019_10x Lymphocytes	0.378101	0.56745	0.1	1000
MRPS23	mitochondrial ribosomal protein S23 [Source:HGNC Symbol;Acc:HGNC:14509]	0.00569907	-0.4588	0.084	0.135	1	Naive T	All other cells	ND1_7.Neftel_2019_10x Lymphocytes	0.237858	0.434551	0.1	1000
PARL	presenilin associated rhomboid like [Source:HGNC Symbol;Acc:HGNC:18253]	0.00570725	-0.446013	0.099	0.17	1	Naive T	All other cells	ND1_7.Neftel_2019_10x Lymphocytes	0.316027	0.549864	0.1	1000
SNAPIN	SNAP associated protein [Source:HGNC Symbol;Acc:HGNC:17145]	0.0057453	-0.296404	0.101	0.163	1	Naive T	All other cells	ND1_7.Neftel_2019_10x Lymphocytes	0.359957	0.518649	0.1	1000
STUB1	STIP1 homology and U-box containing protein 1 [Source:HGNC Symbol;Acc:HGNC:11427]	0.00574708	-0.315631	0.203	0.29	1	Naive T	All other cells	ND1_7.Neftel_2019_10x Lymphocytes	0.696142	0.99161	0.1	1000
SNRNP70	small nuclear ribonucleoprotein U1 subunit 70 [Source:HGNC Symbol;Acc:HGNC:11150]	0.00577958	-0.345151	0.185	0.272	1	Naive T	All other cells	ND1_7.Neftel_2019_10x Lymphocytes	0.655781	0.967316	0.1	1000
RAB7A	RAB7A, member RAS oncogene family [Source:HGNC Symbol;Acc:HGNC:9788]	0.00579923	-0.259676	0.248	0.345	1	Naive T	All other cells	ND1_7.Neftel_2019_10x Lymphocytes	0.978753	1.29861	0.1	1000
TRPC4AP	transient receptor potential cation channel subfamily C member 4 associated protein [Source:HGNC Symbol;Acc:HGNC:16181]	0.00580477	-0.360297	0.054	0.108	1	Naive T	All other cells	ND1_7.Neftel_2019_10x Lymphocytes	0.201879	0.33282	0.1	1000
RASSF1	Ras association domain family member 1 [Source:HGNC Symbol;Acc:HGNC:9882]	0.00582165	-0.534293	0.078	0.155	1	Naive T	All other cells	ND1_7.Neftel_2019_10x Lymphocytes	0.262693	0.518841	0.1	1000
STARD7	StAR related lipid transfer domain containing 7 [Source:HGNC Symbol;Acc:HGNC:18063]	0.00582461	-0.401743	0.081	0.152	1	Naive T	All other cells	ND1_7.Neftel_2019_10x Lymphocytes	0.324775	0.534796	0.1	1000
ANP32A	acidic nuclear phosphoprotein 32 family member A [Source:HGNC Symbol;Acc:HGNC:13233]	0.00586473	-0.337401	0.203	0.292	1	Naive T	All other cells	ND1_7.Neftel_2019_10x Lymphocytes	0.735168	1.07032	0.1	1000
PTPRCAP	protein tyrosine phosphatase receptor type C associated protein [Source:HGNC Symbol;Acc:HGNC:9667]	0.00588009	-0.537891	0.078	0.145	1	Naive T	All other cells	ND1_7.Neftel_2019_10x Lymphocytes	0.583528	1.07047	0.1	1000
ARL2	ADP ribosylation factor like GTPase 2 [Source:HGNC Symbol;Acc:HGNC:693]	0.00593148	-0.468299	0.075	0.128	1	Naive T	All other cells	ND1_7.Neftel_2019_10x Lymphocytes	0.205876	0.388568	0.1	1000
TINF2	TERF1 interacting nuclear factor 2 [Source:HGNC Symbol;Acc:HGNC:11824]	0.00596679	-0.25469	0.143	0.192	1	Naive T	All other cells	ND1_7.Neftel_2019_10x Lymphocytes	0.477094	0.644487	0.1	1000
POLR2G	RNA polymerase II subunit G [Source:HGNC Symbol;Acc:HGNC:9194]	0.00598294	-0.31212	0.239	0.343	1	Naive T	All other cells	ND1_7.Neftel_2019_10x Lymphocytes	0.89333	1.25721	0.1	1000
EBNA1BP2	EBNA1 binding protein 2 [Source:HGNC Symbol;Acc:HGNC:15531]	0.00599131	-0.356084	0.069	0.119	1	Naive T	All other cells	ND1_7.Neftel_2019_10x Lymphocytes	0.213355	0.347385	0.1	1000
TDG	thymine DNA glycosylase [Source:HGNC Symbol;Acc:HGNC:11700]	0.00602507	-0.427781	0.081	0.152	1	Naive T	All other cells	ND1_7.Neftel_2019_10x Lymphocytes	0.283306	0.487934	0.1	1000
GGA1	golgi associated, gamma adaptin ear containing, ARF binding protein 1 [Source:HGNC Symbol;Acc:HGNC:17842]	0.00602858	-0.527106	0.072	0.132	1	Naive T	All other cells	ND1_7.Neftel_2019_10x Lymphocytes	0.237528	0.47178	0.1	1000
ARHGAP30	Rho GTPase activating protein 30 [Source:HGNC Symbol;Acc:HGNC:27414]	0.00605269	-0.387851	0.191	0.284	1	Naive T	All other cells	ND1_7.Neftel_2019_10x Lymphocytes	0.64939	1.00446	0.1	1000
PWP1	PWP1 homolog, endonuclein [Source:HGNC Symbol;Acc:HGNC:17015]	0.0060969	-0.341806	0.09	0.146	1	Naive T	All other cells	ND1_7.Neftel_2019_10x Lymphocytes	0.295205	0.456246	0.1	1000
DDA1	DET1 and DDB1 associated 1 [Source:HGNC Symbol;Acc:HGNC:28360]	0.00614611	-0.287121	0.096	0.15	1	Naive T	All other cells	ND1_7.Neftel_2019_10x Lymphocytes	0.338843	0.484795	0.1	1000
MOAP1	modulator of apoptosis 1 [Source:HGNC Symbol;Acc:HGNC:16658]	0.0061831	-0.550329	0.054	0.109	1	Naive T	All other cells	ND1_7.Neftel_2019_10x Lymphocytes	0.154941	0.342023	0.1	1000
PSENEN	presenilin enhancer, gamma-secretase subunit [Source:HGNC Symbol;Acc:HGNC:30100]	0.00618928	-0.346174	0.131	0.197	1	Naive T	All other cells	ND1_7.Neftel_2019_10x Lymphocytes	0.432609	0.652922	0.1	1000
CNDP2	carnosine dipeptidase 2 [Source:HGNC Symbol;Acc:HGNC:24437]	0.00619291	-0.450565	0.084	0.156	1	Naive T	All other cells	ND1_7.Neftel_2019_10x Lymphocytes	0.270185	0.480894	0.1	1000
ALKBH7	alkB homolog 7 [Source:HGNC Symbol;Acc:HGNC:21306]	0.00624081	0.292827	0.349	0.278	1	Naive T	All other cells	ND1_7.Neftel_2019_10x Lymphocytes	1.34174	0.975753	0.1	1000
VPS13C	vacuolar protein sorting 13 homolog C [Source:HGNC Symbol;Acc:HGNC:23594]	0.00625713	-0.286776	0.104	0.155	1	Naive T	All other cells	ND1_7.Neftel_2019_10x Lymphocytes	0.366184	0.521016	0.1	1000
DERL2	derlin 2 [Source:HGNC Symbol;Acc:HGNC:17943]	0.00628253	-0.265193	0.107	0.167	1	Naive T	All other cells	ND1_7.Neftel_2019_10x Lymphocytes	0.39661	0.547422	0.1	1000
TFDP1	transcription factor Dp-1 [Source:HGNC Symbol;Acc:HGNC:11749]	0.00631415	-0.496161	0.054	0.111	1	Naive T	All other cells	ND1_7.Neftel_2019_10x Lymphocytes	0.155	0.318814	0.1	1000
MED29	mediator complex subunit 29 [Source:HGNC Symbol;Acc:HGNC:23074]	0.00632804	-0.357518	0.057	0.105	1	Naive T	All other cells	ND1_7.Neftel_2019_10x Lymphocytes	0.209058	0.341884	0.1	1000
STX8	syntaxin 8 [Source:HGNC Symbol;Acc:HGNC:11443]	0.00638802	-0.316401	0.122	0.178	1	Naive T	All other cells	ND1_7.Neftel_2019_10x Lymphocytes	0.397671	0.582893	0.1	1000
TBL1XR1	TBL1X receptor 1 [Source:HGNC Symbol;Acc:HGNC:29529]	0.00638938	-0.426758	0.048	0.105	1	Naive T	All other cells	ND1_7.Neftel_2019_10x Lymphocytes	0.173531	0.319127	0.1	1000
VPS37B	VPS37B subunit of ESCRT-I [Source:HGNC Symbol;Acc:HGNC:25754]	0.00641898	-0.496446	0.072	0.131	1	Naive T	All other cells	ND1_7.Neftel_2019_10x Lymphocytes	0.254672	0.48268	0.1	1000
TMCO1	transmembrane and coiled-coil domains 1 [Source:HGNC Symbol;Acc:HGNC:18188]	0.00646763	-0.313482	0.233	0.322	1	Naive T	All other cells	ND1_7.Neftel_2019_10x Lymphocytes	0.869706	1.22673	0.1	1000
DNM2	dynamin 2 [Source:HGNC Symbol;Acc:HGNC:2974]	0.00653408	-0.321755	0.066	0.119	1	Naive T	All other cells	ND1_7.Neftel_2019_10x Lymphocytes	0.252458	0.386232	0.1	1000
C14orf119	chromosome 14 open reading frame 119 [Source:HGNC Symbol;Acc:HGNC:20270]	0.00660039	-0.294084	0.116	0.184	1	Naive T	All other cells	ND1_7.Neftel_2019_10x Lymphocytes	0.417107	0.593904	0.1	1000
SLAMF6	SLAM family member 6 [Source:HGNC Symbol;Acc:HGNC:21392]	0.00664094	-0.348697	0.069	0.117	1	Naive T	All other cells	ND1_7.Neftel_2019_10x Lymphocytes	0.265283	0.417686	0.1	1000
NAA50	N-alpha-acetyltransferase 50, NatE catalytic subunit [Source:HGNC Symbol;Acc:HGNC:29533]	0.00669936	-0.476965	0.093	0.157	1	Naive T	All other cells	ND1_7.Neftel_2019_10x Lymphocytes	0.294923	0.536291	0.1	1000
GRB2	growth factor receptor bound protein 2 [Source:HGNC Symbol;Acc:HGNC:4566]	0.00670532	-0.389674	0.173	0.263	1	Naive T	All other cells	ND1_7.Neftel_2019_10x Lymphocytes	0.594117	0.924863	0.1	1000
SPOP	speckle type BTB/POZ protein [Source:HGNC Symbol;Acc:HGNC:11254]	0.00673477	-0.495181	0.06	0.111	1	Naive T	All other cells	ND1_7.Neftel_2019_10x Lymphocytes	0.171263	0.345087	0.1	1000
SP110	SP110 nuclear body protein [Source:HGNC Symbol;Acc:HGNC:5401]	0.00675769	-0.404213	0.093	0.144	1	Naive T	All other cells	ND1_7.Neftel_2019_10x Lymphocytes	0.300592	0.500136	0.1	1000
MNAT1	MNAT1 component of CDK activating kinase [Source:HGNC Symbol;Acc:HGNC:7181]	0.00676572	-0.449147	0.066	0.129	1	Naive T	All other cells	ND1_7.Neftel_2019_10x Lymphocytes	0.226366	0.411407	0.1	1000
SEC11C	SEC11 homolog C, signal peptidase complex subunit [Source:HGNC Symbol;Acc:HGNC:23400]	0.00676941	-0.28683	0.242	0.314	1	Naive T	All other cells	ND1_7.Neftel_2019_10x Lymphocytes	0.82944	1.1382	0.1	1000
SVBP	small vasohibin binding protein [Source:HGNC Symbol;Acc:HGNC:29204]	0.00679788	-0.331557	0.084	0.144	1	Naive T	All other cells	ND1_7.Neftel_2019_10x Lymphocytes	0.298659	0.455386	0.1	1000
TNFSF10	TNF superfamily member 10 [Source:HGNC Symbol;Acc:HGNC:11925]	0.00683242	-0.510194	0.155	0.211	1	Naive T	All other cells	ND1_7.Neftel_2019_10x Lymphocytes	0.616052	1.09267	0.1	1000
BTN3A1	butyrophilin subfamily 3 member A1 [Source:HGNC Symbol;Acc:HGNC:1138]	0.00683252	-0.484652	0.06	0.102	1	Naive T	All other cells	ND1_7.Neftel_2019_10x Lymphocytes	0.189465	0.369978	0.1	1000
CHORDC1	cysteine and histidine rich domain containing 1 [Source:HGNC Symbol;Acc:HGNC:14525]	0.00686046	-0.348145	0.075	0.121	1	Naive T	All other cells	ND1_7.Neftel_2019_10x Lymphocytes	0.266739	0.419463	0.1	1000
PPP2R5A	protein phosphatase 2 regulatory subunit B'alpha [Source:HGNC Symbol;Acc:HGNC:9309]	0.00687016	-0.43275	0.051	0.102	1	Naive T	All other cells	ND1_7.Neftel_2019_10x Lymphocytes	0.175374	0.324486	0.1	1000
CCL3L3	C-C motif chemokine ligand 3 like 3 [Source:HGNC Symbol;Acc:HGNC:30554]	0.00697103	-0.64343	0.254	0.312	1	Naive T	All other cells	ND1_7.Neftel_2019_10x Lymphocytes	0.901543	1.80593	0.1	1000
RAP1GDS1	Rap1 GTPase-GDP dissociation stimulator 1 [Source:HGNC Symbol;Acc:HGNC:9859]	0.00703973	-0.310505	0.072	0.125	1	Naive T	All other cells	ND1_7.Neftel_2019_10x Lymphocytes	0.292775	0.43579	0.1	1000
ZNF800	zinc finger protein 800 [Source:HGNC Symbol;Acc:HGNC:27267]	0.00712337	-0.319998	0.081	0.139	1	Naive T	All other cells	ND1_7.Neftel_2019_10x Lymphocytes	0.310045	0.464684	0.1	1000
RER1	retention in endoplasmic reticulum sorting receptor 1 [Source:HGNC Symbol;Acc:HGNC:30309]	0.00713963	-0.25435	0.218	0.314	1	Naive T	All other cells	ND1_7.Neftel_2019_10x Lymphocytes	0.828323	1.09719	0.1	1000
GLRX5	glutaredoxin 5 [Source:HGNC Symbol;Acc:HGNC:20134]	0.00725055	-0.421491	0.057	0.103	1	Naive T	All other cells	ND1_7.Neftel_2019_10x Lymphocytes	0.16675	0.306589	0.1	1000
CAT	catalase [Source:HGNC Symbol;Acc:HGNC:1516]	0.00725345	-0.347746	0.081	0.154	1	Naive T	All other cells	ND1_7.Neftel_2019_10x Lymphocytes	0.299041	0.464991	0.1	1000
SUPT5H	SPT5 homolog, DSIF elongation factor subunit [Source:HGNC Symbol;Acc:HGNC:11469]	0.00728571	-0.440661	0.072	0.133	1	Naive T	All other cells	ND1_7.Neftel_2019_10x Lymphocytes	0.237758	0.424787	0.1	1000
LLPH	LLP homolog, long-term synaptic facilitation factor [Source:HGNC Symbol;Acc:HGNC:28229]	0.00730094	-0.446924	0.078	0.129	1	Naive T	All other cells	ND1_7.Neftel_2019_10x Lymphocytes	0.223835	0.406314	0.1	1000
EIF4EBP2	eukaryotic translation initiation factor 4E binding protein 2 [Source:HGNC Symbol;Acc:HGNC:3289]	0.00730154	-0.439675	0.066	0.119	1	Naive T	All other cells	ND1_7.Neftel_2019_10x Lymphocytes	0.20122	0.367555	0.1	1000
SLC2A4RG	SLC2A4 regulator [Source:HGNC Symbol;Acc:HGNC:15930]	0.0073884	-0.272002	0.057	0.108	1	Naive T	All other cells	ND1_7.Neftel_2019_10x Lymphocytes	0.25037	0.359892	0.1	1000
DENR	density regulated re-initiation and release factor [Source:HGNC Symbol;Acc:HGNC:2769]	0.00743577	-0.32075	0.107	0.168	1	Naive T	All other cells	ND1_7.Neftel_2019_10x Lymphocytes	0.369615	0.547206	0.1	1000
HNRNPLL	heterogeneous nuclear ribonucleoprotein L like [Source:HGNC Symbol;Acc:HGNC:25127]	0.00745022	-0.327507	0.113	0.179	1	Naive T	All other cells	ND1_7.Neftel_2019_10x Lymphocytes	0.505687	0.740393	0.1	1000
TPD52	tumor protein D52 [Source:HGNC Symbol;Acc:HGNC:12005]	0.00753245	-0.254347	0.066	0.108	1	Naive T	All other cells	ND1_7.Neftel_2019_10x Lymphocytes	0.230685	0.326457	0.1	1000
BNIP3L	BCL2 interacting protein 3 like [Source:HGNC Symbol;Acc:HGNC:1085]	0.00756557	-0.459801	0.101	0.163	1	Naive T	All other cells	ND1_7.Neftel_2019_10x Lymphocytes	0.337469	0.592845	0.1	1000
MTRNR2L12	MT-RNR2 like 12 [Source:HGNC Symbol;Acc:HGNC:37169]	0.00766132	-0.496235	0.296	0.356	1	Naive T	All other cells	ND1_7.Neftel_2019_10x Lymphocytes	4.88752	8.09213	0.1	1000
PPP2CA	protein phosphatase 2 catalytic subunit alpha [Source:HGNC Symbol;Acc:HGNC:9299]	0.00771768	-0.346558	0.125	0.209	1	Naive T	All other cells	ND1_7.Neftel_2019_10x Lymphocytes	0.438176	0.661084	0.1	1000
USP16	ubiquitin specific peptidase 16 [Source:HGNC Symbol;Acc:HGNC:12614]	0.00773868	-0.326716	0.173	0.247	1	Naive T	All other cells	ND1_7.Neftel_2019_10x Lymphocytes	0.591691	0.858966	0.1	1000
GPR108	G protein-coupled receptor 108 [Source:HGNC Symbol;Acc:HGNC:17829]	0.00778841	-0.391751	0.116	0.177	1	Naive T	All other cells	ND1_7.Neftel_2019_10x Lymphocytes	0.37331	0.600294	0.1	1000
ILF3	interleukin enhancer binding factor 3 [Source:HGNC Symbol;Acc:HGNC:6038]	0.00782962	-0.276821	0.155	0.216	1	Naive T	All other cells	ND1_7.Neftel_2019_10x Lymphocytes	0.529066	0.729695	0.1	1000
DAP3	death associated protein 3 [Source:HGNC Symbol;Acc:HGNC:2673]	0.00785597	-0.384406	0.164	0.237	1	Naive T	All other cells	ND1_7.Neftel_2019_10x Lymphocytes	0.526326	0.819912	0.1	1000
ECHS1	enoyl-CoA hydratase, short chain 1 [Source:HGNC Symbol;Acc:HGNC:3151]	0.0078649	-0.360276	0.125	0.198	1	Naive T	All other cells	ND1_7.Neftel_2019_10x Lymphocytes	0.424447	0.651913	0.1	1000
PRKAR1A	protein kinase cAMP-dependent type I regulatory subunit alpha [Source:HGNC Symbol;Acc:HGNC:9388]	0.00787289	-0.336849	0.152	0.225	1	Naive T	All other cells	ND1_7.Neftel_2019_10x Lymphocytes	0.532487	0.785816	0.1	1000
ARL5A	ADP ribosylation factor like GTPase 5A [Source:HGNC Symbol;Acc:HGNC:696]	0.00788708	-0.264028	0.17	0.253	1	Naive T	All other cells	ND1_7.Neftel_2019_10x Lymphocytes	0.627707	0.847595	0.1	1000
TIMM50	translocase of inner mitochondrial membrane 50 [Source:HGNC Symbol;Acc:HGNC:23656]	0.00794176	-0.27029	0.066	0.114	1	Naive T	All other cells	ND1_7.Neftel_2019_10x Lymphocytes	0.232098	0.335162	0.1	1000
PSMD3	proteasome 26S subunit, non-ATPase 3 [Source:HGNC Symbol;Acc:HGNC:9560]	0.00798613	-0.334778	0.096	0.147	1	Naive T	All other cells	ND1_7.Neftel_2019_10x Lymphocytes	0.296097	0.453597	0.1	1000
VDAC3	voltage dependent anion channel 3 [Source:HGNC Symbol;Acc:HGNC:12674]	0.00807112	-0.266957	0.191	0.265	1	Naive T	All other cells	ND1_7.Neftel_2019_10x Lymphocytes	0.676292	0.913825	0.1	1000
KLHDC4	kelch domain containing 4 [Source:HGNC Symbol;Acc:HGNC:25272]	0.00818179	-0.486131	0.057	0.11	1	Naive T	All other cells	ND1_7.Neftel_2019_10x Lymphocytes	0.173306	0.344399	0.1	1000
URM1	ubiquitin related modifier 1 [Source:HGNC Symbol;Acc:HGNC:28378]	0.0082305	-0.357687	0.125	0.177	1	Naive T	All other cells	ND1_7.Neftel_2019_10x Lymphocytes	0.374463	0.57849	0.1	1000
TIPRL	TOR signaling pathway regulator [Source:HGNC Symbol;Acc:HGNC:30231]	0.00823713	-0.288983	0.107	0.159	1	Naive T	All other cells	ND1_7.Neftel_2019_10x Lymphocytes	0.378478	0.538802	0.1	1000
COPB2	COPI coat complex subunit beta 2 [Source:HGNC Symbol;Acc:HGNC:2232]	0.0083125	-0.32971	0.054	0.108	1	Naive T	All other cells	ND1_7.Neftel_2019_10x Lymphocytes	0.202024	0.319983	0.1	1000
RAD50	RAD50 double strand break repair protein [Source:HGNC Symbol;Acc:HGNC:9816]	0.00831801	-0.263342	0.066	0.118	1	Naive T	All other cells	ND1_7.Neftel_2019_10x Lymphocytes	0.252623	0.358858	0.1	1000
SPON2	spondin 2 [Source:HGNC Symbol;Acc:HGNC:11253]	0.00837767	-0.706677	0.09	0.153	1	Naive T	All other cells	ND1_7.Neftel_2019_10x Lymphocytes	0.331079	0.773902	0.1	1000
SMC5	structural maintenance of chromosomes 5 [Source:HGNC Symbol;Acc:HGNC:20465]	0.00839519	-0.453437	0.072	0.126	1	Naive T	All other cells	ND1_7.Neftel_2019_10x Lymphocytes	0.214411	0.394793	0.1	1000
TIMM10	translocase of inner mitochondrial membrane 10 [Source:HGNC Symbol;Acc:HGNC:11814]	0.00850935	-0.302446	0.125	0.183	1	Naive T	All other cells	ND1_7.Neftel_2019_10x Lymphocytes	0.414883	0.596722	0.1	1000
LSM10	LSM10, U7 small nuclear RNA associated [Source:HGNC Symbol;Acc:HGNC:17562]	0.00852579	-0.296369	0.143	0.222	1	Naive T	All other cells	ND1_7.Neftel_2019_10x Lymphocytes	0.515261	0.727505	0.1	1000
C1orf35	chromosome 1 open reading frame 35 [Source:HGNC Symbol;Acc:HGNC:19032]	0.0085359	-0.391656	0.06	0.114	1	Naive T	All other cells	ND1_7.Neftel_2019_10x Lymphocytes	0.21008	0.358741	0.1	1000
AK2	adenylate kinase 2 [Source:HGNC Symbol;Acc:HGNC:362]	0.00856744	-0.35761	0.09	0.137	1	Naive T	All other cells	ND1_7.Neftel_2019_10x Lymphocytes	0.272789	0.433054	0.1	1000
CISD2	CDGSH iron sulfur domain 2 [Source:HGNC Symbol;Acc:HGNC:24212]	0.00858234	-0.32717	0.096	0.163	1	Naive T	All other cells	ND1_7.Neftel_2019_10x Lymphocytes	0.355959	0.532432	0.1	1000
STK25	serine/threonine kinase 25 [Source:HGNC Symbol;Acc:HGNC:11404]	0.00859929	-0.436327	0.066	0.115	1	Naive T	All other cells	ND1_7.Neftel_2019_10x Lymphocytes	0.203232	0.369104	0.1	1000
KLF3	Kruppel like factor 3 [Source:HGNC Symbol;Acc:HGNC:16516]	0.00861653	0.400401	0.137	0.083	1	Naive T	All other cells	ND1_7.Neftel_2019_10x Lymphocytes	0.533986	0.324803	0.1	1000
HK1	hexokinase 1 [Source:HGNC Symbol;Acc:HGNC:4922]	0.00863451	-0.267174	0.081	0.126	1	Naive T	All other cells	ND1_7.Neftel_2019_10x Lymphocytes	0.264137	0.37566	0.1	1000
PFDN6	prefoldin subunit 6 [Source:HGNC Symbol;Acc:HGNC:4926]	0.00864032	-0.353388	0.096	0.156	1	Naive T	All other cells	ND1_7.Neftel_2019_10x Lymphocytes	0.302457	0.473052	0.1	1000
FAM50A	family with sequence similarity 50 member A [Source:HGNC Symbol;Acc:HGNC:18786]	0.00873822	-0.298842	0.143	0.204	1	Naive T	All other cells	ND1_7.Neftel_2019_10x Lymphocytes	0.464879	0.661624	0.1	1000
DCAF7	DDB1 and CUL4 associated factor 7 [Source:HGNC Symbol;Acc:HGNC:30915]	0.00878268	-0.29547	0.081	0.13	1	Naive T	All other cells	ND1_7.Neftel_2019_10x Lymphocytes	0.301813	0.43994	0.1	1000
MFF	mitochondrial fission factor [Source:HGNC Symbol;Acc:HGNC:24858]	0.00878536	-0.262772	0.128	0.197	1	Naive T	All other cells	ND1_7.Neftel_2019_10x Lymphocytes	0.463299	0.632588	0.1	1000
ABT1	activator of basal transcription 1 [Source:HGNC Symbol;Acc:HGNC:17369]	0.00883037	-0.388988	0.113	0.174	1	Naive T	All other cells	ND1_7.Neftel_2019_10x Lymphocytes	0.34605	0.55814	0.1	1000
NDUFS2	NADH:ubiquinone oxidoreductase core subunit S2 [Source:HGNC Symbol;Acc:HGNC:7708]	0.00885153	-0.267279	0.09	0.147	1	Naive T	All other cells	ND1_7.Neftel_2019_10x Lymphocytes	0.331365	0.463538	0.1	1000
BAG1	BAG cochaperone 1 [Source:HGNC Symbol;Acc:HGNC:937]	0.00885406	-0.389039	0.134	0.21	1	Naive T	All other cells	ND1_7.Neftel_2019_10x Lymphocytes	0.438672	0.694844	0.1	1000
C1QC	complement C1q C chain [Source:HGNC Symbol;Acc:HGNC:1245]	0.00888686	-0.339898	0.221	0.293	1	Naive T	All other cells	ND1_7.Neftel_2019_10x Lymphocytes	0.823459	1.19728	0.1	1000
SLC38A10	solute carrier family 38 member 10 [Source:HGNC Symbol;Acc:HGNC:28237]	0.00889097	-0.409471	0.054	0.105	1	Naive T	All other cells	ND1_7.Neftel_2019_10x Lymphocytes	0.175458	0.314846	0.1	1000
VOPP1	VOPP1 WW domain binding protein [Source:HGNC Symbol;Acc:HGNC:34518]	0.00906018	-0.390638	0.104	0.166	1	Naive T	All other cells	ND1_7.Neftel_2019_10x Lymphocytes	0.35629	0.574362	0.1	1000
MICAL1	microtubule associated monooxygenase, calponin and LIM domain containing 1 [Source:HGNC Symbol;Acc:HGNC:20619]	0.00907395	-0.459615	0.06	0.105	1	Naive T	All other cells	ND1_7.Neftel_2019_10x Lymphocytes	0.181598	0.345901	0.1	1000
PLIN2	perilipin 2 [Source:HGNC Symbol;Acc:HGNC:248]	0.00909425	-0.291691	0.161	0.236	1	Naive T	All other cells	ND1_7.Neftel_2019_10x Lymphocytes	0.688238	0.955205	0.1	1000
BRD4	bromodomain containing 4 [Source:HGNC Symbol;Acc:HGNC:13575]	0.00917213	-0.360038	0.081	0.138	1	Naive T	All other cells	ND1_7.Neftel_2019_10x Lymphocytes	0.280001	0.444687	0.1	1000
MAP2K3	mitogen-activated protein kinase kinase 3 [Source:HGNC Symbol;Acc:HGNC:6843]	0.00918423	-0.373206	0.099	0.158	1	Naive T	All other cells	ND1_7.Neftel_2019_10x Lymphocytes	0.316143	0.5044	0.1	1000
FNTA	farnesyltransferase, CAAX box, alpha [Source:HGNC Symbol;Acc:HGNC:3782]	0.00919766	-0.253048	0.131	0.187	1	Naive T	All other cells	ND1_7.Neftel_2019_10x Lymphocytes	0.448581	0.606542	0.1	1000
ADPGK	ADP dependent glucokinase [Source:HGNC Symbol;Acc:HGNC:25250]	0.00919818	-0.429287	0.06	0.112	1	Naive T	All other cells	ND1_7.Neftel_2019_10x Lymphocytes	0.207136	0.371811	0.1	1000
MGAT2	alpha-1,6-mannosyl-glycoprotein 2-beta-N-acetylglucosaminyltransferase [Source:HGNC Symbol;Acc:HGNC:7045]	0.00925951	-0.412421	0.063	0.114	1	Naive T	All other cells	ND1_7.Neftel_2019_10x Lymphocytes	0.195896	0.346942	0.1	1000
RBM6	RNA binding motif protein 6 [Source:HGNC Symbol;Acc:HGNC:9903]	0.00933963	-0.396321	0.069	0.12	1	Naive T	All other cells	ND1_7.Neftel_2019_10x Lymphocytes	0.228325	0.388005	0.1	1000
CCT5	chaperonin containing TCP1 subunit 5 [Source:HGNC Symbol;Acc:HGNC:1618]	0.00934349	-0.250698	0.161	0.229	1	Naive T	All other cells	ND1_7.Neftel_2019_10x Lymphocytes	0.598903	0.798036	0.1	1000
CEBPZ	CCAAT enhancer binding protein zeta [Source:HGNC Symbol;Acc:HGNC:24218]	0.00937499	-0.328199	0.104	0.16	1	Naive T	All other cells	ND1_7.Neftel_2019_10x Lymphocytes	0.351999	0.527586	0.1	1000
NT5C	5', 3'-nucleotidase, cytosolic [Source:HGNC Symbol;Acc:HGNC:17144]	0.00939272	-0.328601	0.143	0.226	1	Naive T	All other cells	ND1_7.Neftel_2019_10x Lymphocytes	0.516619	0.756499	0.1	1000
DCAF11	DDB1 and CUL4 associated factor 11 [Source:HGNC Symbol;Acc:HGNC:20258]	0.00950997	-0.304294	0.087	0.142	1	Naive T	All other cells	ND1_7.Neftel_2019_10x Lymphocytes	0.290932	0.429974	0.1	1000
NDUFC2	NADH:ubiquinone oxidoreductase subunit C2 [Source:HGNC Symbol;Acc:HGNC:7706]	0.00952255	-0.360623	0.266	0.332	1	Naive T	All other cells	ND1_7.Neftel_2019_10x Lymphocytes	0.852424	1.26599	0.1	1000
PCBP1	poly(rC) binding protein 1 [Source:HGNC Symbol;Acc:HGNC:8647]	0.00966063	-0.275809	0.364	0.429	1	Naive T	All other cells	ND1_7.Neftel_2019_10x Lymphocytes	1.32515	1.77777	0.1	1000
WNK1	WNK lysine deficient protein kinase 1 [Source:HGNC Symbol;Acc:HGNC:14540]	0.00990235	-0.461407	0.14	0.212	1	Naive T	All other cells	ND1_7.Neftel_2019_10x Lymphocytes	0.48775	0.83235	0.1	1000
RAB29	RAB29, member RAS oncogene family [Source:HGNC Symbol;Acc:HGNC:9789]	0.0100514	-0.418201	0.057	0.107	1	Naive T	All other cells	ND1_7.Neftel_2019_10x Lymphocytes	0.202051	0.358884	0.1	1000
HP1BP3	heterochromatin protein 1 binding protein 3 [Source:HGNC Symbol;Acc:HGNC:24973]	0.0101616	-0.286002	0.209	0.286	1	Naive T	All other cells	ND1_7.Neftel_2019_10x Lymphocytes	0.78319	1.07561	0.1	1000
C3AR1	complement C3a receptor 1 [Source:HGNC Symbol;Acc:HGNC:1319]	0.0103361	-0.432661	0.063	0.118	1	Naive T	All other cells	ND1_7.Neftel_2019_10x Lymphocytes	0.213933	0.383882	0.1	1000
SLC16A3	solute carrier family 16 member 3 [Source:HGNC Symbol;Acc:HGNC:10924]	0.0103427	-0.58777	0.075	0.138	1	Naive T	All other cells	ND1_7.Neftel_2019_10x Lymphocytes	0.221482	0.478658	0.1	1000
KIF20B	kinesin family member 20B [Source:HGNC Symbol;Acc:HGNC:7212]	0.0103739	-0.429009	0.057	0.102	1	Naive T	All other cells	ND1_7.Neftel_2019_10x Lymphocytes	0.183181	0.334891	0.1	1000
PSMD12	proteasome 26S subunit, non-ATPase 12 [Source:HGNC Symbol;Acc:HGNC:9557]	0.0104125	-0.415731	0.084	0.134	1	Naive T	All other cells	ND1_7.Neftel_2019_10x Lymphocytes	0.244751	0.422464	0.1	1000
CRIPT	CXXC repeat containing interactor of PDZ3 domain [Source:HGNC Symbol;Acc:HGNC:14312]	0.0105158	-0.301375	0.072	0.123	1	Naive T	All other cells	ND1_7.Neftel_2019_10x Lymphocytes	0.250473	0.37374	0.1	1000
UBE2G1	ubiquitin conjugating enzyme E2 G1 [Source:HGNC Symbol;Acc:HGNC:12482]	0.0105433	-0.301963	0.093	0.144	1	Naive T	All other cells	ND1_7.Neftel_2019_10x Lymphocytes	0.319716	0.46767	0.1	1000
CHCHD3	coiled-coil-helix-coiled-coil-helix domain containing 3 [Source:HGNC Symbol;Acc:HGNC:21906]	0.0105497	-0.416964	0.063	0.113	1	Naive T	All other cells	ND1_7.Neftel_2019_10x Lymphocytes	0.191253	0.341932	0.1	1000
GPBP1	GC-rich promoter binding protein 1 [Source:HGNC Symbol;Acc:HGNC:29520]	0.010569	-0.278742	0.275	0.352	1	Naive T	All other cells	ND1_7.Neftel_2019_10x Lymphocytes	1.04088	1.40763	0.1	1000
CUTC	cutC copper transporter [Source:HGNC Symbol;Acc:HGNC:24271]	0.0106204	-0.528643	0.066	0.122	1	Naive T	All other cells	ND1_7.Neftel_2019_10x Lymphocytes	0.193907	0.398652	0.1	1000
BDP1	B double prime 1, subunit of RNA polymerase III transcription initiation factor IIIB [Source:HGNC Symbol;Acc:HGNC:13652]	0.0106515	-0.279139	0.107	0.165	1	Naive T	All other cells	ND1_7.Neftel_2019_10x Lymphocytes	0.377501	0.531253	0.1	1000
NUBP2	nucleotide binding protein 2 [Source:HGNC Symbol;Acc:HGNC:8042]	0.0107561	-0.283749	0.107	0.163	1	Naive T	All other cells	ND1_7.Neftel_2019_10x Lymphocytes	0.357641	0.507792	0.1	1000
PIGT	phosphatidylinositol glycan anchor biosynthesis class T [Source:HGNC Symbol;Acc:HGNC:14938]	0.0108049	-0.340024	0.09	0.139	1	Naive T	All other cells	ND1_7.Neftel_2019_10x Lymphocytes	0.272026	0.42269	0.1	1000
ATG5	autophagy related 5 [Source:HGNC Symbol;Acc:HGNC:589]	0.0108989	-0.28618	0.093	0.146	1	Naive T	All other cells	ND1_7.Neftel_2019_10x Lymphocytes	0.330614	0.473289	0.1	1000
LGALS9	galectin 9 [Source:HGNC Symbol;Acc:HGNC:6570]	0.010947	-0.498354	0.072	0.129	1	Naive T	All other cells	ND1_7.Neftel_2019_10x Lymphocytes	0.229731	0.442741	0.1	1000
HSPA9	heat shock protein family A (Hsp70) member 9 [Source:HGNC Symbol;Acc:HGNC:5244]	0.0109508	-0.276557	0.176	0.255	1	Naive T	All other cells	ND1_7.Neftel_2019_10x Lymphocytes	0.653744	0.893874	0.1	1000
CEBPB	CCAAT enhancer binding protein beta [Source:HGNC Symbol;Acc:HGNC:1834]	0.0110729	-0.274273	0.254	0.326	1	Naive T	All other cells	ND1_7.Neftel_2019_10x Lymphocytes	1.09667	1.4743	0.1	1000
DNASE2	deoxyribonuclease 2, lysosomal [Source:HGNC Symbol;Acc:HGNC:2960]	0.0112603	-0.352387	0.075	0.131	1	Naive T	All other cells	ND1_7.Neftel_2019_10x Lymphocytes	0.262406	0.415507	0.1	1000
ZNF106	zinc finger protein 106 [Source:HGNC Symbol;Acc:HGNC:12886]	0.0113361	-0.349268	0.06	0.107	1	Naive T	All other cells	ND1_7.Neftel_2019_10x Lymphocytes	0.20677	0.335009	0.1	1000
XPO1	exportin 1 [Source:HGNC Symbol;Acc:HGNC:12825]	0.0113493	-0.33402	0.054	0.103	1	Naive T	All other cells	ND1_7.Neftel_2019_10x Lymphocytes	0.204942	0.325874	0.1	1000
IKBKG	inhibitor of nuclear factor kappa B kinase regulatory subunit gamma [Source:HGNC Symbol;Acc:HGNC:5961]	0.0113862	-0.331815	0.066	0.104	1	Naive T	All other cells	ND1_7.Neftel_2019_10x Lymphocytes	0.197092	0.313996	0.1	1000
ITGAL	integrin subunit alpha L [Source:HGNC Symbol;Acc:HGNC:6148]	0.0114366	-0.32884	0.096	0.146	1	Naive T	All other cells	ND1_7.Neftel_2019_10x Lymphocytes	0.347866	0.522245	0.1	1000
PLEKHO1	pleckstrin homology domain containing O1 [Source:HGNC Symbol;Acc:HGNC:24310]	0.0115295	-0.426206	0.066	0.118	1	Naive T	All other cells	ND1_7.Neftel_2019_10x Lymphocytes	0.205758	0.368249	0.1	1000
ATRX	ATRX chromatin remodeler [Source:HGNC Symbol;Acc:HGNC:886]	0.0115995	-0.300742	0.221	0.294	1	Naive T	All other cells	ND1_7.Neftel_2019_10x Lymphocytes	0.776174	1.08359	0.1	1000
RPF1	ribosome production factor 1 homolog [Source:HGNC Symbol;Acc:HGNC:30350]	0.0117704	-0.306674	0.093	0.147	1	Naive T	All other cells	ND1_7.Neftel_2019_10x Lymphocytes	0.319803	0.47047	0.1	1000
RUVBL1	RuvB like AAA ATPase 1 [Source:HGNC Symbol;Acc:HGNC:10474]	0.0117718	-0.441101	0.075	0.127	1	Naive T	All other cells	ND1_7.Neftel_2019_10x Lymphocytes	0.208821	0.380037	0.1	1000
RBM23	RNA binding motif protein 23 [Source:HGNC Symbol;Acc:HGNC:20155]	0.0120271	-0.288658	0.063	0.109	1	Naive T	All other cells	ND1_7.Neftel_2019_10x Lymphocytes	0.239377	0.352945	0.1	1000
CUEDC2	CUE domain containing 2 [Source:HGNC Symbol;Acc:HGNC:28352]	0.0120871	-0.334223	0.11	0.165	1	Naive T	All other cells	ND1_7.Neftel_2019_10x Lymphocytes	0.347953	0.525725	0.1	1000
ERLEC1	endoplasmic reticulum lectin 1 [Source:HGNC Symbol;Acc:HGNC:25222]	0.012109	-0.283744	0.113	0.16	1	Naive T	All other cells	ND1_7.Neftel_2019_10x Lymphocytes	0.385662	0.545004	0.1	1000
ATRAID	all-trans retinoic acid induced differentiation factor [Source:HGNC Symbol;Acc:HGNC:24090]	0.0122563	-0.274953	0.254	0.333	1	Naive T	All other cells	ND1_7.Neftel_2019_10x Lymphocytes	0.887541	1.20007	0.1	1000
RIC8A	RIC8 guanine nucleotide exchange factor A [Source:HGNC Symbol;Acc:HGNC:29550]	0.0122573	-0.333278	0.096	0.145	1	Naive T	All other cells	ND1_7.Neftel_2019_10x Lymphocytes	0.313151	0.476567	0.1	1000
ABCF1	ATP binding cassette subfamily F member 1 [Source:HGNC Symbol;Acc:HGNC:70]	0.0122934	-0.252378	0.116	0.16	1	Naive T	All other cells	ND1_7.Neftel_2019_10x Lymphocytes	0.381212	0.51936	0.1	1000
SDF4	stromal cell derived factor 4 [Source:HGNC Symbol;Acc:HGNC:24188]	0.0123812	-0.255939	0.185	0.241	1	Naive T	All other cells	ND1_7.Neftel_2019_10x Lymphocytes	0.630134	0.843096	0.1	1000
THOC2	THO complex 2 [Source:HGNC Symbol;Acc:HGNC:19073]	0.0123869	-0.378743	0.113	0.183	1	Naive T	All other cells	ND1_7.Neftel_2019_10x Lymphocytes	0.409442	0.644013	0.1	1000
CAPN1	calpain 1 [Source:HGNC Symbol;Acc:HGNC:1476]	0.0124801	-0.263597	0.128	0.186	1	Naive T	All other cells	ND1_7.Neftel_2019_10x Lymphocytes	0.437378	0.599453	0.1	1000
DCTD	dCMP deaminase [Source:HGNC Symbol;Acc:HGNC:2710]	0.012492	-0.324038	0.078	0.122	1	Naive T	All other cells	ND1_7.Neftel_2019_10x Lymphocytes	0.244129	0.375827	0.1	1000
DNPEP	aspartyl aminopeptidase [Source:HGNC Symbol;Acc:HGNC:2981]	0.0125572	-0.338956	0.084	0.136	1	Naive T	All other cells	ND1_7.Neftel_2019_10x Lymphocytes	0.278117	0.43068	0.1	1000
DESI1	desumoylating isopeptidase 1 [Source:HGNC Symbol;Acc:HGNC:24577]	0.0126453	-0.290992	0.057	0.109	1	Naive T	All other cells	ND1_7.Neftel_2019_10x Lymphocytes	0.214143	0.320247	0.1	1000
MRPL9	mitochondrial ribosomal protein L9 [Source:HGNC Symbol;Acc:HGNC:14277]	0.0127023	-0.329717	0.134	0.203	1	Naive T	All other cells	ND1_7.Neftel_2019_10x Lymphocytes	0.44769	0.661604	0.1	1000
SOCS2	suppressor of cytokine signaling 2 [Source:HGNC Symbol;Acc:HGNC:19382]	0.0127158	0.380688	0.134	0.083	1	Naive T	All other cells	ND1_7.Neftel_2019_10x Lymphocytes	0.490917	0.303827	0.1	1000
IL10RB	interleukin 10 receptor subunit beta [Source:HGNC Symbol;Acc:HGNC:5965]	0.0127509	-0.302738	0.063	0.106	1	Naive T	All other cells	ND1_7.Neftel_2019_10x Lymphocytes	0.225995	0.341254	0.1	1000
PCED1B	PC-esterase domain containing 1B [Source:HGNC Symbol;Acc:HGNC:28255]	0.0128324	-0.458692	0.087	0.141	1	Naive T	All other cells	ND1_7.Neftel_2019_10x Lymphocytes	0.282529	0.505163	0.1	1000
BID	BH3 interacting domain death agonist [Source:HGNC Symbol;Acc:HGNC:1050]	0.0128477	-0.370172	0.09	0.155	1	Naive T	All other cells	ND1_7.Neftel_2019_10x Lymphocytes	0.300331	0.479673	0.1	1000
WIPI2	WD repeat domain, phosphoinositide interacting 2 [Source:HGNC Symbol;Acc:HGNC:32225]	0.0130155	-0.312662	0.093	0.145	1	Naive T	All other cells	ND1_7.Neftel_2019_10x Lymphocytes	0.312114	0.463384	0.1	1000
PTGES2	prostaglandin E synthase 2 [Source:HGNC Symbol;Acc:HGNC:17822]	0.0130657	-0.490413	0.069	0.122	1	Naive T	All other cells	ND1_7.Neftel_2019_10x Lymphocytes	0.190811	0.374891	0.1	1000
GPAA1	glycosylphosphatidylinositol anchor attachment 1 [Source:HGNC Symbol;Acc:HGNC:4446]	0.013073	-0.365647	0.09	0.146	1	Naive T	All other cells	ND1_7.Neftel_2019_10x Lymphocytes	0.294665	0.468888	0.1	1000
CCDC88C	coiled-coil domain containing 88C [Source:HGNC Symbol;Acc:HGNC:19967]	0.0131917	-0.308715	0.107	0.157	1	Naive T	All other cells	ND1_7.Neftel_2019_10x Lymphocytes	0.363024	0.530488	0.1	1000
RAB14	RAB14, member RAS oncogene family [Source:HGNC Symbol;Acc:HGNC:16524]	0.0133119	-0.29008	0.116	0.175	1	Naive T	All other cells	ND1_7.Neftel_2019_10x Lymphocytes	0.411518	0.583661	0.1	1000
VPS26B	VPS26, retromer complex component B [Source:HGNC Symbol;Acc:HGNC:28119]	0.013374	-0.298151	0.063	0.111	1	Naive T	All other cells	ND1_7.Neftel_2019_10x Lymphocytes	0.239407	0.357306	0.1	1000
RSL1D1	ribosomal L1 domain containing 1 [Source:HGNC Symbol;Acc:HGNC:24534]	0.0133936	0.250531	0.358	0.309	1	Naive T	All other cells	ND1_7.Neftel_2019_10x Lymphocytes	1.44652	1.10379	0.1	1000
TUBB4B	tubulin beta 4B class IVb [Source:HGNC Symbol;Acc:HGNC:20771]	0.0136843	-0.267062	0.122	0.181	1	Naive T	All other cells	ND1_7.Neftel_2019_10x Lymphocytes	0.493886	0.675687	0.1	1000
HMGN4	high mobility group nucleosomal binding domain 4 [Source:HGNC Symbol;Acc:HGNC:4989]	0.0138071	-0.743129	0.051	0.107	1	Naive T	All other cells	ND1_7.Neftel_2019_10x Lymphocytes	0.154921	0.435972	0.1	1000
IST1	IST1 factor associated with ESCRT-III [Source:HGNC Symbol;Acc:HGNC:28977]	0.01404	-0.368253	0.066	0.107	1	Naive T	All other cells	ND1_7.Neftel_2019_10x Lymphocytes	0.208917	0.34645	0.1	1000
ATXN1	ataxin 1 [Source:HGNC Symbol;Acc:HGNC:10548]	0.0143151	-0.531807	0.048	0.101	1	Naive T	All other cells	ND1_7.Neftel_2019_10x Lymphocytes	0.156619	0.336766	0.1	1000
LMNA	lamin A/C [Source:HGNC Symbol;Acc:HGNC:6636]	0.0144781	0.41654	0.107	0.076	1	Naive T	All other cells	ND1_7.Neftel_2019_10x Lymphocytes	0.535742	0.31916	0.1	1000
PPP6R1	protein phosphatase 6 regulatory subunit 1 [Source:HGNC Symbol;Acc:HGNC:29195]	0.0145235	-0.338951	0.063	0.106	1	Naive T	All other cells	ND1_7.Neftel_2019_10x Lymphocytes	0.204418	0.327243	0.1	1000
RAB6A	RAB6A, member RAS oncogene family [Source:HGNC Symbol;Acc:HGNC:9786]	0.0146059	-0.361164	0.093	0.143	1	Naive T	All other cells	ND1_7.Neftel_2019_10x Lymphocytes	0.338419	0.529131	0.1	1000
STMN3	stathmin 3 [Source:HGNC Symbol;Acc:HGNC:15926]	0.0146136	0.439205	0.14	0.086	1	Naive T	All other cells	ND1_7.Neftel_2019_10x Lymphocytes	0.494647	0.283279	0.1	1000
SDF2	stromal cell derived factor 2 [Source:HGNC Symbol;Acc:HGNC:10675]	0.0147385	-0.385051	0.099	0.161	1	Naive T	All other cells	ND1_7.Neftel_2019_10x Lymphocytes	0.318208	0.514635	0.1	1000
MYD88	MYD88 innate immune signal transduction adaptor [Source:HGNC Symbol;Acc:HGNC:7562]	0.0147684	-0.276441	0.075	0.116	1	Naive T	All other cells	ND1_7.Neftel_2019_10x Lymphocytes	0.255632	0.368875	0.1	1000
CLINT1	clathrin interactor 1 [Source:HGNC Symbol;Acc:HGNC:23186]	0.0147849	-0.293885	0.099	0.138	1	Naive T	All other cells	ND1_7.Neftel_2019_10x Lymphocytes	0.301517	0.438687	0.1	1000
TMEM70	transmembrane protein 70 [Source:HGNC Symbol;Acc:HGNC:26050]	0.0148994	-0.34431	0.081	0.131	1	Naive T	All other cells	ND1_7.Neftel_2019_10x Lymphocytes	0.259053	0.406629	0.1	1000
PKN1	protein kinase N1 [Source:HGNC Symbol;Acc:HGNC:9405]	0.0149726	-0.319304	0.11	0.162	1	Naive T	All other cells	ND1_7.Neftel_2019_10x Lymphocytes	0.356353	0.528019	0.1	1000
TMEM167A	transmembrane protein 167A [Source:HGNC Symbol;Acc:HGNC:28330]	0.0150542	-0.313187	0.155	0.215	1	Naive T	All other cells	ND1_7.Neftel_2019_10x Lymphocytes	0.491785	0.709431	0.1	1000
MRPS5	mitochondrial ribosomal protein S5 [Source:HGNC Symbol;Acc:HGNC:14498]	0.0150993	-0.420835	0.101	0.163	1	Naive T	All other cells	ND1_7.Neftel_2019_10x Lymphocytes	0.320529	0.540563	0.1	1000
PNPLA2	patatin like phospholipase domain containing 2 [Source:HGNC Symbol;Acc:HGNC:30802]	0.0151543	-0.309248	0.093	0.142	1	Naive T	All other cells	ND1_7.Neftel_2019_10x Lymphocytes	0.336163	0.494228	0.1	1000
DCTPP1	dCTP pyrophosphatase 1 [Source:HGNC Symbol;Acc:HGNC:28777]	0.0151768	-0.324815	0.087	0.152	1	Naive T	All other cells	ND1_7.Neftel_2019_10x Lymphocytes	0.297683	0.450304	0.1	1000
PBRM1	polybromo 1 [Source:HGNC Symbol;Acc:HGNC:30064]	0.0152842	-0.431601	0.054	0.101	1	Naive T	All other cells	ND1_7.Neftel_2019_10x Lymphocytes	0.162508	0.304189	0.1	1000
NSMCE4A	NSE4 homolog A, SMC5-SMC6 complex component [Source:HGNC Symbol;Acc:HGNC:25935]	0.0153083	-0.337778	0.072	0.123	1	Naive T	All other cells	ND1_7.Neftel_2019_10x Lymphocytes	0.233936	0.368122	0.1	1000
SREK1IP1	SREK1 interacting protein 1 [Source:HGNC Symbol;Acc:HGNC:26716]	0.0153425	-0.295099	0.081	0.146	1	Naive T	All other cells	ND1_7.Neftel_2019_10x Lymphocytes	0.339087	0.489807	0.1	1000
CCS	copper chaperone for superoxide dismutase [Source:HGNC Symbol;Acc:HGNC:1613]	0.0154026	-0.256708	0.093	0.136	1	Naive T	All other cells	ND1_7.Neftel_2019_10x Lymphocytes	0.326685	0.451562	0.1	1000
COMMD4	COMM domain containing 4 [Source:HGNC Symbol;Acc:HGNC:26027]	0.0155665	-0.301873	0.096	0.15	1	Naive T	All other cells	ND1_7.Neftel_2019_10x Lymphocytes	0.309313	0.453551	0.1	1000
UBA3	ubiquitin like modifier activating enzyme 3 [Source:HGNC Symbol;Acc:HGNC:12470]	0.0155782	-0.350725	0.066	0.111	1	Naive T	All other cells	ND1_7.Neftel_2019_10x Lymphocytes	0.212284	0.343474	0.1	1000
PABPC4	poly(A) binding protein cytoplasmic 4 [Source:HGNC Symbol;Acc:HGNC:8557]	0.0156332	0.264187	0.194	0.139	1	Naive T	All other cells	ND1_7.Neftel_2019_10x Lymphocytes	0.592226	0.431512	0.1	1000
ATF7IP	activating transcription factor 7 interacting protein [Source:HGNC Symbol;Acc:HGNC:20092]	0.0157139	-0.37992	0.09	0.149	1	Naive T	All other cells	ND1_7.Neftel_2019_10x Lymphocytes	0.328239	0.526158	0.1	1000
GON4L	gon-4 like [Source:HGNC Symbol;Acc:HGNC:25973]	0.0160145	-0.374662	0.09	0.141	1	Naive T	All other cells	ND1_7.Neftel_2019_10x Lymphocytes	0.281517	0.454916	0.1	1000
DOCK2	dedicator of cytokinesis 2 [Source:HGNC Symbol;Acc:HGNC:2988]	0.0160319	-0.352677	0.084	0.141	1	Naive T	All other cells	ND1_7.Neftel_2019_10x Lymphocytes	0.296947	0.464805	0.1	1000
PIP4K2A	phosphatidylinositol-5-phosphate 4-kinase type 2 alpha [Source:HGNC Symbol;Acc:HGNC:8997]	0.0160344	-0.354282	0.152	0.225	1	Naive T	All other cells	ND1_7.Neftel_2019_10x Lymphocytes	0.525882	0.79198	0.1	1000
TMC6	transmembrane channel like 6 [Source:HGNC Symbol;Acc:HGNC:18021]	0.0160654	-0.284247	0.179	0.246	1	Naive T	All other cells	ND1_7.Neftel_2019_10x Lymphocytes	0.60837	0.841254	0.1	1000
PNP	purine nucleoside phosphorylase [Source:HGNC Symbol;Acc:HGNC:7892]	0.0161561	-0.352373	0.063	0.11	1	Naive T	All other cells	ND1_7.Neftel_2019_10x Lymphocytes	0.213663	0.346167	0.1	1000
PRPF4B	pre-mRNA processing factor 4B [Source:HGNC Symbol;Acc:HGNC:17346]	0.0162829	-0.28869	0.128	0.174	1	Naive T	All other cells	ND1_7.Neftel_2019_10x Lymphocytes	0.409543	0.580075	0.1	1000
BRIX1	biogenesis of ribosomes BRX1 [Source:HGNC Symbol;Acc:HGNC:24170]	0.0164215	-0.283206	0.057	0.103	1	Naive T	All other cells	ND1_7.Neftel_2019_10x Lymphocytes	0.211184	0.313059	0.1	1000
NUDT14	nudix hydrolase 14 [Source:HGNC Symbol;Acc:HGNC:20141]	0.0164242	-0.268612	0.081	0.134	1	Naive T	All other cells	ND1_7.Neftel_2019_10x Lymphocytes	0.316779	0.445209	0.1	1000
U2AF2	U2 small nuclear RNA auxiliary factor 2 [Source:HGNC Symbol;Acc:HGNC:23156]	0.0165406	-0.284361	0.069	0.115	1	Naive T	All other cells	ND1_7.Neftel_2019_10x Lymphocytes	0.242438	0.355071	0.1	1000
TP53I13	tumor protein p53 inducible protein 13 [Source:HGNC Symbol;Acc:HGNC:25102]	0.0167853	-0.286887	0.06	0.107	1	Naive T	All other cells	ND1_7.Neftel_2019_10x Lymphocytes	0.217454	0.322936	0.1	1000
SRPK1	SRSF protein kinase 1 [Source:HGNC Symbol;Acc:HGNC:11305]	0.0168939	-0.272003	0.09	0.137	1	Naive T	All other cells	ND1_7.Neftel_2019_10x Lymphocytes	0.310192	0.438414	0.1	1000
JMJD1C	jumonji domain containing 1C [Source:HGNC Symbol;Acc:HGNC:12313]	0.0169179	-0.265652	0.125	0.172	1	Naive T	All other cells	ND1_7.Neftel_2019_10x Lymphocytes	0.461161	0.631912	0.1	1000
CNOT4	CCR4-NOT transcription complex subunit 4 [Source:HGNC Symbol;Acc:HGNC:7880]	0.0171049	-0.318005	0.084	0.121	1	Naive T	All other cells	ND1_7.Neftel_2019_10x Lymphocytes	0.260645	0.395664	0.1	1000
GOLPH3	golgi phosphoprotein 3 [Source:HGNC Symbol;Acc:HGNC:15452]	0.0173176	-0.286807	0.087	0.136	1	Naive T	All other cells	ND1_7.Neftel_2019_10x Lymphocytes	0.311804	0.448592	0.1	1000
CCT7	chaperonin containing TCP1 subunit 7 [Source:HGNC Symbol;Acc:HGNC:1622]	0.0173447	-0.280904	0.221	0.286	1	Naive T	All other cells	ND1_7.Neftel_2019_10x Lymphocytes	0.710257	0.973044	0.1	1000
KLHDC3	kelch domain containing 3 [Source:HGNC Symbol;Acc:HGNC:20704]	0.0173691	-0.401507	0.066	0.122	1	Naive T	All other cells	ND1_7.Neftel_2019_10x Lymphocytes	0.223846	0.38385	0.1	1000
NEMF	nuclear export mediator factor [Source:HGNC Symbol;Acc:HGNC:10663]	0.0174116	-0.416593	0.119	0.175	1	Naive T	All other cells	ND1_7.Neftel_2019_10x Lymphocytes	0.359713	0.597285	0.1	1000
RRAGA	Ras related GTP binding A [Source:HGNC Symbol;Acc:HGNC:16963]	0.0176024	-0.360381	0.093	0.142	1	Naive T	All other cells	ND1_7.Neftel_2019_10x Lymphocytes	0.297298	0.469677	0.1	1000
GRHPR	glyoxylate and hydroxypyruvate reductase [Source:HGNC Symbol;Acc:HGNC:4570]	0.0176652	-0.271897	0.075	0.127	1	Naive T	All other cells	ND1_7.Neftel_2019_10x Lymphocytes	0.287882	0.409077	0.1	1000
IFRD1	interferon related developmental regulator 1 [Source:HGNC Symbol;Acc:HGNC:5456]	0.0178129	-0.286712	0.084	0.121	1	Naive T	All other cells	ND1_7.Neftel_2019_10x Lymphocytes	0.324085	0.464899	0.1	1000
RAB1A	RAB1A, member RAS oncogene family [Source:HGNC Symbol;Acc:HGNC:9758]	0.0178603	-0.327652	0.11	0.173	1	Naive T	All other cells	ND1_7.Neftel_2019_10x Lymphocytes	0.366217	0.546973	0.1	1000
DCXR	dicarbonyl and L-xylulose reductase [Source:HGNC Symbol;Acc:HGNC:18985]	0.0179194	-0.293021	0.197	0.268	1	Naive T	All other cells	ND1_7.Neftel_2019_10x Lymphocytes	0.682884	0.949433	0.1	1000
TPRKB	TP53RK binding protein [Source:HGNC Symbol;Acc:HGNC:24259]	0.0180863	-0.282507	0.107	0.157	1	Naive T	All other cells	ND1_7.Neftel_2019_10x Lymphocytes	0.350813	0.497981	0.1	1000
YBEY	ybeY metalloendoribonuclease [Source:HGNC Symbol;Acc:HGNC:1299]	0.0181002	0.287866	0.104	0.071	1	Naive T	All other cells	ND1_7.Neftel_2019_10x Lymphocytes	0.347793	0.235783	0.1	1000
SLC2A3	solute carrier family 2 member 3 [Source:HGNC Symbol;Acc:HGNC:11007]	0.0181724	0.309047	0.43	0.367	1	Naive T	All other cells	ND1_7.Neftel_2019_10x Lymphocytes	2.57413	1.86321	0.1	1000
DNAJC2	DnaJ heat shock protein family (Hsp40) member C2 [Source:HGNC Symbol;Acc:HGNC:13192]	0.0182704	-0.266059	0.087	0.14	1	Naive T	All other cells	ND1_7.Neftel_2019_10x Lymphocytes	0.307423	0.43161	0.1	1000
PPM1B	protein phosphatase, Mg2+/Mn2+ dependent 1B [Source:HGNC Symbol;Acc:HGNC:9276]	0.0184609	-0.294207	0.104	0.157	1	Naive T	All other cells	ND1_7.Neftel_2019_10x Lymphocytes	0.36867	0.528984	0.1	1000
ABHD14A	abhydrolase domain containing 14A [Source:HGNC Symbol;Acc:HGNC:24538]	0.0186251	-0.336467	0.087	0.128	1	Naive T	All other cells	ND1_7.Neftel_2019_10x Lymphocytes	0.260266	0.40437	0.1	1000
RTN3	reticulon 3 [Source:HGNC Symbol;Acc:HGNC:10469]	0.0186567	-0.252086	0.107	0.153	1	Naive T	All other cells	ND1_7.Neftel_2019_10x Lymphocytes	0.350019	0.479042	0.1	1000
SPN	sialophorin [Source:HGNC Symbol;Acc:HGNC:11249]	0.0186955	-0.342332	0.179	0.251	1	Naive T	All other cells	ND1_7.Neftel_2019_10x Lymphocytes	0.599672	0.885298	0.1	1000
VDAC2	voltage dependent anion channel 2 [Source:HGNC Symbol;Acc:HGNC:12672]	0.0187218	-0.27668	0.272	0.361	1	Naive T	All other cells	ND1_7.Neftel_2019_10x Lymphocytes	1.03076	1.39118	0.1	1000
NR4A1	nuclear receptor subfamily 4 group A member 1 [Source:HGNC Symbol;Acc:HGNC:7980]	0.0187735	-0.429486	0.09	0.134	1	Naive T	All other cells	ND1_7.Neftel_2019_10x Lymphocytes	0.638301	1.03438	0.1	1000
BCLAF1	BCL2 associated transcription factor 1 [Source:HGNC Symbol;Acc:HGNC:16863]	0.018991	-0.294497	0.179	0.246	1	Naive T	All other cells	ND1_7.Neftel_2019_10x Lymphocytes	0.656961	0.916183	0.1	1000
RPN1	ribophorin I [Source:HGNC Symbol;Acc:HGNC:10381]	0.0190116	-0.316293	0.134	0.207	1	Naive T	All other cells	ND1_7.Neftel_2019_10x Lymphocytes	0.488677	0.707684	0.1	1000
PSPC1	paraspeckle component 1 [Source:HGNC Symbol;Acc:HGNC:20320]	0.0192332	-0.33211	0.075	0.123	1	Naive T	All other cells	ND1_7.Neftel_2019_10x Lymphocytes	0.247597	0.384518	0.1	1000
BOLA3	bolA family member 3 [Source:HGNC Symbol;Acc:HGNC:24415]	0.0192362	-0.334653	0.143	0.224	1	Naive T	All other cells	ND1_7.Neftel_2019_10x Lymphocytes	0.506034	0.746905	0.1	1000
ILF2	interleukin enhancer binding factor 2 [Source:HGNC Symbol;Acc:HGNC:6037]	0.0193211	-0.308093	0.23	0.299	1	Naive T	All other cells	ND1_7.Neftel_2019_10x Lymphocytes	0.775008	1.09073	0.1	1000
FRG1	FSHD region gene 1 [Source:HGNC Symbol;Acc:HGNC:3954]	0.0193233	-0.315061	0.131	0.189	1	Naive T	All other cells	ND1_7.Neftel_2019_10x Lymphocytes	0.421079	0.614057	0.1	1000
KCNAB2	potassium voltage-gated channel subfamily A regulatory beta subunit 2 [Source:HGNC Symbol;Acc:HGNC:6229]	0.0196233	-0.333581	0.099	0.148	1	Naive T	All other cells	ND1_7.Neftel_2019_10x Lymphocytes	0.333758	0.505507	0.1	1000
C1orf131	chromosome 1 open reading frame 131 [Source:HGNC Symbol;Acc:HGNC:25332]	0.0196956	-0.361867	0.072	0.108	1	Naive T	All other cells	ND1_7.Neftel_2019_10x Lymphocytes	0.209757	0.344813	0.1	1000
HTATIP2	HIV-1 Tat interactive protein 2 [Source:HGNC Symbol;Acc:HGNC:16637]	0.0197282	-0.414676	0.09	0.145	1	Naive T	All other cells	ND1_7.Neftel_2019_10x Lymphocytes	0.271259	0.462042	0.1	1000
FAM32A	family with sequence similarity 32 member A [Source:HGNC Symbol;Acc:HGNC:24563]	0.01976	-0.270548	0.128	0.18	1	Naive T	All other cells	ND1_7.Neftel_2019_10x Lymphocytes	0.418959	0.580191	0.1	1000
GPBP1L1	GC-rich promoter binding protein 1 like 1 [Source:HGNC Symbol;Acc:HGNC:28843]	0.0198736	-0.38677	0.075	0.121	1	Naive T	All other cells	ND1_7.Neftel_2019_10x Lymphocytes	0.236031	0.394711	0.1	1000
DNAJB14	DnaJ heat shock protein family (Hsp40) member B14 [Source:HGNC Symbol;Acc:HGNC:25881]	0.0199169	-0.326417	0.101	0.162	1	Naive T	All other cells	ND1_7.Neftel_2019_10x Lymphocytes	0.36045	0.53818	0.1	1000
LBR	lamin B receptor [Source:HGNC Symbol;Acc:HGNC:6518]	0.0201265	-0.412025	0.128	0.19	1	Naive T	All other cells	ND1_7.Neftel_2019_10x Lymphocytes	0.395446	0.648059	0.1	1000
FEZ2	fasciculation and elongation protein zeta 2 [Source:HGNC Symbol;Acc:HGNC:3660]	0.0204647	-0.262477	0.063	0.102	1	Naive T	All other cells	ND1_7.Neftel_2019_10x Lymphocytes	0.219306	0.315144	0.1	1000
FUOM	fucose mutarotase [Source:HGNC Symbol;Acc:HGNC:24733]	0.0205553	-0.491236	0.054	0.102	1	Naive T	All other cells	ND1_7.Neftel_2019_10x Lymphocytes	0.151941	0.311757	0.1	1000
GOLGA8B	golgin A8 family member B [Source:HGNC Symbol;Acc:HGNC:31973]	0.0205812	-0.324211	0.066	0.103	1	Naive T	All other cells	ND1_7.Neftel_2019_10x Lymphocytes	0.216045	0.337071	0.1	1000
ZNF207	zinc finger protein 207 [Source:HGNC Symbol;Acc:HGNC:12998]	0.0206271	-0.282345	0.185	0.259	1	Naive T	All other cells	ND1_7.Neftel_2019_10x Lymphocytes	0.662323	0.911021	0.1	1000
ZDHHC6	zinc finger DHHC-type palmitoyltransferase 6 [Source:HGNC Symbol;Acc:HGNC:19160]	0.0209519	-0.420695	0.057	0.112	1	Naive T	All other cells	ND1_7.Neftel_2019_10x Lymphocytes	0.206903	0.36742	0.1	1000
MAP2K1	mitogen-activated protein kinase kinase 1 [Source:HGNC Symbol;Acc:HGNC:6840]	0.0213001	-0.293632	0.116	0.161	1	Naive T	All other cells	ND1_7.Neftel_2019_10x Lymphocytes	0.360733	0.517977	0.1	1000
RNF125	ring finger protein 125 [Source:HGNC Symbol;Acc:HGNC:21150]	0.0213043	-0.29168	0.122	0.184	1	Naive T	All other cells	ND1_7.Neftel_2019_10x Lymphocytes	0.451365	0.638099	0.1	1000
MIB2	MIB E3 ubiquitin protein ligase 2 [Source:HGNC Symbol;Acc:HGNC:30577]	0.021306	-0.420226	0.087	0.129	1	Naive T	All other cells	ND1_7.Neftel_2019_10x Lymphocytes	0.269302	0.462191	0.1	1000
C15orf61	chromosome 15 open reading frame 61 [Source:HGNC Symbol;Acc:HGNC:34453]	0.0213301	-0.47335	0.066	0.12	1	Naive T	All other cells	ND1_7.Neftel_2019_10x Lymphocytes	0.205757	0.390851	0.1	1000
PFDN1	prefoldin subunit 1 [Source:HGNC Symbol;Acc:HGNC:8866]	0.0214064	-0.360115	0.137	0.199	1	Naive T	All other cells	ND1_7.Neftel_2019_10x Lymphocytes	0.430772	0.660858	0.1	1000
POLR2A	RNA polymerase II subunit A [Source:HGNC Symbol;Acc:HGNC:9187]	0.0215182	-0.348949	0.081	0.119	1	Naive T	All other cells	ND1_7.Neftel_2019_10x Lymphocytes	0.262881	0.414411	0.1	1000
C1GALT1	core 1 synthase, glycoprotein-N-acetylgalactosamine 3-beta-galactosyltransferase 1 [Source:HGNC Symbol;Acc:HGNC:24337]	0.0215849	-0.30623	0.081	0.129	1	Naive T	All other cells	ND1_7.Neftel_2019_10x Lymphocytes	0.279011	0.414809	0.1	1000
CYFIP2	cytoplasmic FMR1 interacting protein 2 [Source:HGNC Symbol;Acc:HGNC:13760]	0.0216178	-0.254691	0.158	0.224	1	Naive T	All other cells	ND1_7.Neftel_2019_10x Lymphocytes	0.561063	0.752812	0.1	1000
PPP2R3C	protein phosphatase 2 regulatory subunit B''gamma [Source:HGNC Symbol;Acc:HGNC:17485]	0.0216487	-0.302448	0.099	0.146	1	Naive T	All other cells	ND1_7.Neftel_2019_10x Lymphocytes	0.314538	0.46094	0.1	1000
RNF34	ring finger protein 34 [Source:HGNC Symbol;Acc:HGNC:17297]	0.0217171	-0.531967	0.054	0.106	1	Naive T	All other cells	ND1_7.Neftel_2019_10x Lymphocytes	0.152162	0.32925	0.1	1000
MX2	MX dynamin like GTPase 2 [Source:HGNC Symbol;Acc:HGNC:7533]	0.0217512	-0.368842	0.078	0.112	1	Naive T	All other cells	ND1_7.Neftel_2019_10x Lymphocytes	0.289399	0.463094	0.1	1000
TAX1BP1	Tax1 binding protein 1 [Source:HGNC Symbol;Acc:HGNC:11575]	0.0219543	-0.279142	0.266	0.354	1	Naive T	All other cells	ND1_7.Neftel_2019_10x Lymphocytes	1.00934	1.36654	0.1	1000
TGFBR2	transforming growth factor beta receptor 2 [Source:HGNC Symbol;Acc:HGNC:11773]	0.0219743	-0.292061	0.093	0.147	1	Naive T	All other cells	ND1_7.Neftel_2019_10x Lymphocytes	0.388533	0.554236	0.1	1000
UTP18	UTP18 small subunit processome component [Source:HGNC Symbol;Acc:HGNC:24274]	0.0219889	-0.395419	0.054	0.103	1	Naive T	All other cells	ND1_7.Neftel_2019_10x Lymphocytes	0.183738	0.321353	0.1	1000
CRELD2	cysteine rich with EGF like domains 2 [Source:HGNC Symbol;Acc:HGNC:28150]	0.0224422	-0.460479	0.116	0.183	1	Naive T	All other cells	ND1_7.Neftel_2019_10x Lymphocytes	0.336285	0.591438	0.1	1000
PTPN4	protein tyrosine phosphatase non-receptor type 4 [Source:HGNC Symbol;Acc:HGNC:9656]	0.0225137	-0.332802	0.158	0.229	1	Naive T	All other cells	ND1_7.Neftel_2019_10x Lymphocytes	0.550416	0.807247	0.1	1000
UHMK1	U2AF homology motif kinase 1 [Source:HGNC Symbol;Acc:HGNC:19683]	0.0225462	-0.325513	0.081	0.124	1	Naive T	All other cells	ND1_7.Neftel_2019_10x Lymphocytes	0.27223	0.415442	0.1	1000
DHX36	DEAH-box helicase 36 [Source:HGNC Symbol;Acc:HGNC:14410]	0.0225814	-0.322297	0.188	0.274	1	Naive T	All other cells	ND1_7.Neftel_2019_10x Lymphocytes	0.671316	0.964644	0.1	1000
IDH3B	isocitrate dehydrogenase (NAD(+)) 3 non-catalytic subunit beta [Source:HGNC Symbol;Acc:HGNC:5385]	0.0226152	-0.320933	0.119	0.183	1	Naive T	All other cells	ND1_7.Neftel_2019_10x Lymphocytes	0.409072	0.601711	0.1	1000
CCM2	CCM2 scaffold protein [Source:HGNC Symbol;Acc:HGNC:21708]	0.0227398	-0.319564	0.104	0.146	1	Naive T	All other cells	ND1_7.Neftel_2019_10x Lymphocytes	0.337025	0.501577	0.1	1000
ZDHHC24	zinc finger DHHC-type containing 24 [Source:HGNC Symbol;Acc:HGNC:27387]	0.0227561	-0.447602	0.066	0.122	1	Naive T	All other cells	ND1_7.Neftel_2019_10x Lymphocytes	0.203808	0.375325	0.1	1000
SAE1	SUMO1 activating enzyme subunit 1 [Source:HGNC Symbol;Acc:HGNC:30660]	0.0231218	-0.362515	0.087	0.133	1	Naive T	All other cells	ND1_7.Neftel_2019_10x Lymphocytes	0.270372	0.432201	0.1	1000
RNF19A	ring finger protein 19A, RBR E3 ubiquitin protein ligase [Source:HGNC Symbol;Acc:HGNC:13432]	0.0235959	-0.279288	0.179	0.243	1	Naive T	All other cells	ND1_7.Neftel_2019_10x Lymphocytes	0.841599	1.14497	0.1	1000
SNAP47	synaptosome associated protein 47 [Source:HGNC Symbol;Acc:HGNC:30669]	0.0240296	-0.407608	0.075	0.131	1	Naive T	All other cells	ND1_7.Neftel_2019_10x Lymphocytes	0.247459	0.422307	0.1	1000
NSFL1C	NSFL1 cofactor [Source:HGNC Symbol;Acc:HGNC:15912]	0.0241261	-0.365109	0.078	0.126	1	Naive T	All other cells	ND1_7.Neftel_2019_10x Lymphocytes	0.245471	0.39771	0.1	1000
INO80E	INO80 complex subunit E [Source:HGNC Symbol;Acc:HGNC:26905]	0.024373	-0.268784	0.072	0.112	1	Naive T	All other cells	ND1_7.Neftel_2019_10x Lymphocytes	0.256648	0.366628	0.1	1000
AKAP9	A-kinase anchoring protein 9 [Source:HGNC Symbol;Acc:HGNC:379]	0.024427	-0.268186	0.17	0.233	1	Naive T	All other cells	ND1_7.Neftel_2019_10x Lymphocytes	0.635028	0.861115	0.1	1000
THEM4	thioesterase superfamily member 4 [Source:HGNC Symbol;Acc:HGNC:17947]	0.024437	0.437189	0.164	0.114	1	Naive T	All other cells	ND1_7.Neftel_2019_10x Lymphocytes	0.639159	0.377385	0.1	1000
MRPL19	mitochondrial ribosomal protein L19 [Source:HGNC Symbol;Acc:HGNC:14052]	0.0245531	-0.299841	0.063	0.102	1	Naive T	All other cells	ND1_7.Neftel_2019_10x Lymphocytes	0.203345	0.309408	0.1	1000
ZNF638	zinc finger protein 638 [Source:HGNC Symbol;Acc:HGNC:17894]	0.0253408	-0.360139	0.072	0.105	1	Naive T	All other cells	ND1_7.Neftel_2019_10x Lymphocytes	0.212825	0.348444	0.1	1000
EMC6	ER membrane protein complex subunit 6 [Source:HGNC Symbol;Acc:HGNC:28430]	0.0253522	-0.269411	0.176	0.233	1	Naive T	All other cells	ND1_7.Neftel_2019_10x Lymphocytes	0.594409	0.809116	0.1	1000
ATOX1	antioxidant 1 copper chaperone [Source:HGNC Symbol;Acc:HGNC:798]	0.0255899	-0.337209	0.122	0.181	1	Naive T	All other cells	ND1_7.Neftel_2019_10x Lymphocytes	0.399109	0.599268	0.1	1000
PIM3	Pim-3 proto-oncogene, serine/threonine kinase [Source:HGNC Symbol;Acc:HGNC:19310]	0.0256039	-0.29208	0.084	0.14	1	Naive T	All other cells	ND1_7.Neftel_2019_10x Lymphocytes	0.366842	0.525199	0.1	1000
USF2	upstream transcription factor 2, c-fos interacting [Source:HGNC Symbol;Acc:HGNC:12594]	0.0256932	-0.376768	0.075	0.117	1	Naive T	All other cells	ND1_7.Neftel_2019_10x Lymphocytes	0.223729	0.371857	0.1	1000
APOL3	apolipoprotein L3 [Source:HGNC Symbol;Acc:HGNC:14868]	0.0258668	-0.301443	0.081	0.116	1	Naive T	All other cells	ND1_7.Neftel_2019_10x Lymphocytes	0.247251	0.369416	0.1	1000
SRSF6	serine and arginine rich splicing factor 6 [Source:HGNC Symbol;Acc:HGNC:10788]	0.0259253	-0.272068	0.075	0.115	1	Naive T	All other cells	ND1_7.Neftel_2019_10x Lymphocytes	0.254748	0.365669	0.1	1000
TMBIM1	transmembrane BAX inhibitor motif containing 1 [Source:HGNC Symbol;Acc:HGNC:23410]	0.026026	-0.390715	0.078	0.125	1	Naive T	All other cells	ND1_7.Neftel_2019_10x Lymphocytes	0.260906	0.433433	0.1	1000
NEK7	NIMA related kinase 7 [Source:HGNC Symbol;Acc:HGNC:13386]	0.0261358	-0.380013	0.063	0.101	1	Naive T	All other cells	ND1_7.Neftel_2019_10x Lymphocytes	0.209611	0.352746	0.1	1000
PPCS	phosphopantothenoylcysteine synthetase [Source:HGNC Symbol;Acc:HGNC:25686]	0.0265597	-0.257289	0.158	0.218	1	Naive T	All other cells	ND1_7.Neftel_2019_10x Lymphocytes	0.53438	0.720519	0.1	1000
HNRNPL	heterogeneous nuclear ribonucleoprotein L [Source:HGNC Symbol;Acc:HGNC:5045]	0.0266686	-0.324806	0.084	0.129	1	Naive T	All other cells	ND1_7.Neftel_2019_10x Lymphocytes	0.309084	0.466076	0.1	1000
NUB1	negative regulator of ubiquitin like proteins 1 [Source:HGNC Symbol;Acc:HGNC:17623]	0.0266898	-0.261247	0.11	0.152	1	Naive T	All other cells	ND1_7.Neftel_2019_10x Lymphocytes	0.381753	0.525579	0.1	1000
VDAC1	voltage dependent anion channel 1 [Source:HGNC Symbol;Acc:HGNC:12669]	0.0267626	-0.288147	0.284	0.359	1	Naive T	All other cells	ND1_7.Neftel_2019_10x Lymphocytes	0.997489	1.364	0.1	1000
DUT	deoxyuridine triphosphatase [Source:HGNC Symbol;Acc:HGNC:3078]	0.0268001	-0.317505	0.269	0.321	1	Naive T	All other cells	ND1_7.Neftel_2019_10x Lymphocytes	1.03284	1.45618	0.1	1000
MYO1G	myosin IG [Source:HGNC Symbol;Acc:HGNC:13880]	0.0268148	-0.320818	0.215	0.292	1	Naive T	All other cells	ND1_7.Neftel_2019_10x Lymphocytes	0.768243	1.09666	0.1	1000
TSNAX	translin associated factor X [Source:HGNC Symbol;Acc:HGNC:12380]	0.0269361	-0.300338	0.06	0.103	1	Naive T	All other cells	ND1_7.Neftel_2019_10x Lymphocytes	0.196955	0.300983	0.1	1000
COPS5	COP9 signalosome subunit 5 [Source:HGNC Symbol;Acc:HGNC:2240]	0.027039	-0.315862	0.11	0.165	1	Naive T	All other cells	ND1_7.Neftel_2019_10x Lymphocytes	0.363192	0.535241	0.1	1000
SMARCC2	SWI/SNF related, matrix associated, actin dependent regulator of chromatin subfamily c member 2 [Source:HGNC Symbol;Acc:HGNC:11105]	0.0272646	-0.409787	0.063	0.102	1	Naive T	All other cells	ND1_7.Neftel_2019_10x Lymphocytes	0.1874	0.332968	0.1	1000
IL16	interleukin 16 [Source:HGNC Symbol;Acc:HGNC:5980]	0.0278312	-0.303382	0.197	0.268	1	Naive T	All other cells	ND1_7.Neftel_2019_10x Lymphocytes	0.697861	0.980648	0.1	1000
KMT2A	lysine methyltransferase 2A [Source:HGNC Symbol;Acc:HGNC:7132]	0.0278501	-0.315063	0.093	0.125	1	Naive T	All other cells	ND1_7.Neftel_2019_10x Lymphocytes	0.292208	0.437461	0.1	1000
ZNF394	zinc finger protein 394 [Source:HGNC Symbol;Acc:HGNC:18832]	0.0284047	-0.374063	0.084	0.128	1	Naive T	All other cells	ND1_7.Neftel_2019_10x Lymphocytes	0.265924	0.431918	0.1	1000
GTF2B	general transcription factor IIB [Source:HGNC Symbol;Acc:HGNC:4648]	0.0285369	-0.306396	0.149	0.191	1	Naive T	All other cells	ND1_7.Neftel_2019_10x Lymphocytes	0.463944	0.66613	0.1	1000
NAA10	N-alpha-acetyltransferase 10, NatA catalytic subunit [Source:HGNC Symbol;Acc:HGNC:18704]	0.0287321	-0.261486	0.158	0.209	1	Naive T	All other cells	ND1_7.Neftel_2019_10x Lymphocytes	0.498203	0.676982	0.1	1000
RFTN1	raftlin, lipid raft linker 1 [Source:HGNC Symbol;Acc:HGNC:30278]	0.0288388	-0.348405	0.06	0.103	1	Naive T	All other cells	ND1_7.Neftel_2019_10x Lymphocytes	0.226452	0.362519	0.1	1000
ELOVL1	ELOVL fatty acid elongase 1 [Source:HGNC Symbol;Acc:HGNC:14418]	0.0292934	-0.31671	0.078	0.128	1	Naive T	All other cells	ND1_7.Neftel_2019_10x Lymphocytes	0.272361	0.411105	0.1	1000
CTSH	cathepsin H [Source:HGNC Symbol;Acc:HGNC:2535]	0.0293333	0.35446	0.185	0.131	1	Naive T	All other cells	ND1_7.Neftel_2019_10x Lymphocytes	0.696625	0.458874	0.1	1000
RAB10	RAB10, member RAS oncogene family [Source:HGNC Symbol;Acc:HGNC:9759]	0.029606	-0.336151	0.119	0.176	1	Naive T	All other cells	ND1_7.Neftel_2019_10x Lymphocytes	0.376516	0.566908	0.1	1000
ARFGAP3	ADP ribosylation factor GTPase activating protein 3 [Source:HGNC Symbol;Acc:HGNC:661]	0.0298991	-0.328862	0.069	0.111	1	Naive T	All other cells	ND1_7.Neftel_2019_10x Lymphocytes	0.219707	0.344196	0.1	1000
ROCK1	Rho associated coiled-coil containing protein kinase 1 [Source:HGNC Symbol;Acc:HGNC:10251]	0.0301107	-0.251326	0.191	0.259	1	Naive T	All other cells	ND1_7.Neftel_2019_10x Lymphocytes	0.668743	0.888395	0.1	1000
PRRC2C	proline rich coiled-coil 2C [Source:HGNC Symbol;Acc:HGNC:24903]	0.0303231	-0.29642	0.379	0.453	1	Naive T	All other cells	ND1_7.Neftel_2019_10x Lymphocytes	1.37893	1.88921	0.1	1000
YIPF3	Yip1 domain family member 3 [Source:HGNC Symbol;Acc:HGNC:21023]	0.0303766	-0.344028	0.107	0.164	1	Naive T	All other cells	ND1_7.Neftel_2019_10x Lymphocytes	0.350552	0.535557	0.1	1000
TSPAN14	tetraspanin 14 [Source:HGNC Symbol;Acc:HGNC:23303]	0.0305183	-0.304435	0.116	0.181	1	Naive T	All other cells	ND1_7.Neftel_2019_10x Lymphocytes	0.429074	0.617349	0.1	1000
C1orf162	chromosome 1 open reading frame 162 [Source:HGNC Symbol;Acc:HGNC:28344]	0.0307547	0.26497	0.167	0.124	1	Naive T	All other cells	ND1_7.Neftel_2019_10x Lymphocytes	0.68612	0.503134	0.1	1000
PSMB8-AS1	PSMB8 antisense RNA 1 (head to head) [Source:NCBI gene (formerly Entrezgene);Acc:100507463]	0.030809	-0.251563	0.149	0.211	1	Naive T	All other cells	ND1_7.Neftel_2019_10x Lymphocytes	0.575174	0.768296	0.1	1000
MRPS10	mitochondrial ribosomal protein S10 [Source:HGNC Symbol;Acc:HGNC:14502]	0.0311883	-0.331311	0.075	0.115	1	Naive T	All other cells	ND1_7.Neftel_2019_10x Lymphocytes	0.218637	0.343796	0.1	1000
WDR45	WD repeat domain 45 [Source:HGNC Symbol;Acc:HGNC:28912]	0.0311946	-0.432381	0.069	0.111	1	Naive T	All other cells	ND1_7.Neftel_2019_10x Lymphocytes	0.192462	0.350662	0.1	1000
METTL5	methyltransferase like 5 [Source:HGNC Symbol;Acc:HGNC:25006]	0.0313266	-0.261007	0.17	0.235	1	Naive T	All other cells	ND1_7.Neftel_2019_10x Lymphocytes	0.564204	0.762295	0.1	1000
CCDC124	coiled-coil domain containing 124 [Source:HGNC Symbol;Acc:HGNC:25171]	0.0314025	-0.279083	0.125	0.178	1	Naive T	All other cells	ND1_7.Neftel_2019_10x Lymphocytes	0.407257	0.570552	0.1	1000
SERINC3	serine incorporator 3 [Source:HGNC Symbol;Acc:HGNC:11699]	0.0314411	-0.319758	0.104	0.147	1	Naive T	All other cells	ND1_7.Neftel_2019_10x Lymphocytes	0.328556	0.490033	0.1	1000
BTF3L4	basic transcription factor 3 like 4 [Source:HGNC Symbol;Acc:HGNC:30547]	0.0315864	-0.294073	0.116	0.178	1	Naive T	All other cells	ND1_7.Neftel_2019_10x Lymphocytes	0.39704	0.566969	0.1	1000
GGA2	golgi associated, gamma adaptin ear containing, ARF binding protein 2 [Source:HGNC Symbol;Acc:HGNC:16064]	0.0316058	-0.278636	0.084	0.125	1	Naive T	All other cells	ND1_7.Neftel_2019_10x Lymphocytes	0.295913	0.423131	0.1	1000
ABI1	abl interactor 1 [Source:HGNC Symbol;Acc:HGNC:11320]	0.0316496	-0.458541	0.107	0.172	1	Naive T	All other cells	ND1_7.Neftel_2019_10x Lymphocytes	0.314596	0.555793	0.1	1000
LBH	LBH regulator of WNT signaling pathway [Source:HGNC Symbol;Acc:HGNC:29532]	0.0318857	-0.275838	0.182	0.244	1	Naive T	All other cells	ND1_7.Neftel_2019_10x Lymphocytes	0.736839	1.00265	0.1	1000
EXOSC3	exosome component 3 [Source:HGNC Symbol;Acc:HGNC:17944]	0.0319573	-0.262527	0.057	0.103	1	Naive T	All other cells	ND1_7.Neftel_2019_10x Lymphocytes	0.206186	0.298106	0.1	1000
GTF2H5	general transcription factor IIH subunit 5 [Source:HGNC Symbol;Acc:HGNC:21157]	0.0325368	-0.301418	0.167	0.233	1	Naive T	All other cells	ND1_7.Neftel_2019_10x Lymphocytes	0.593112	0.836931	0.1	1000
PRPF31	pre-mRNA processing factor 31 [Source:HGNC Symbol;Acc:HGNC:15446]	0.032654	-0.255083	0.131	0.19	1	Naive T	All other cells	ND1_7.Neftel_2019_10x Lymphocytes	0.43587	0.591577	0.1	1000
SLC38A2	solute carrier family 38 member 2 [Source:HGNC Symbol;Acc:HGNC:13448]	0.0327552	-0.317738	0.099	0.155	1	Naive T	All other cells	ND1_7.Neftel_2019_10x Lymphocytes	0.375697	0.553616	0.1	1000
ENOPH1	enolase-phosphatase 1 [Source:HGNC Symbol;Acc:HGNC:24599]	0.033239	-0.367688	0.075	0.121	1	Naive T	All other cells	ND1_7.Neftel_2019_10x Lymphocytes	0.235931	0.385216	0.1	1000
EXOSC8	exosome component 8 [Source:HGNC Symbol;Acc:HGNC:17035]	0.033491	-0.363439	0.078	0.128	1	Naive T	All other cells	ND1_7.Neftel_2019_10x Lymphocytes	0.236598	0.384117	0.1	1000
KLRG1	killer cell lectin like receptor G1 [Source:HGNC Symbol;Acc:HGNC:6380]	0.0335025	-0.40474	0.084	0.131	1	Naive T	All other cells	ND1_7.Neftel_2019_10x Lymphocytes	0.307893	0.511397	0.1	1000
RHNO1	RAD9-HUS1-RAD1 interacting nuclear orphan 1 [Source:HGNC Symbol;Acc:HGNC:28206]	0.0337879	-0.263744	0.075	0.119	1	Naive T	All other cells	ND1_7.Neftel_2019_10x Lymphocytes	0.260081	0.368752	0.1	1000
NMRAL1	NmrA like redox sensor 1 [Source:HGNC Symbol;Acc:HGNC:24987]	0.0344173	-0.380106	0.078	0.125	1	Naive T	All other cells	ND1_7.Neftel_2019_10x Lymphocytes	0.253854	0.417491	0.1	1000
SBDS	SBDS ribosome maturation factor [Source:HGNC Symbol;Acc:HGNC:19440]	0.0344464	0.347067	0.299	0.241	1	Naive T	All other cells	ND1_7.Neftel_2019_10x Lymphocytes	1.33772	0.91612	0.1	1000
PNN	pinin, desmosome associated protein [Source:HGNC Symbol;Acc:HGNC:9162]	0.0349454	-0.25408	0.236	0.299	1	Naive T	All other cells	ND1_7.Neftel_2019_10x Lymphocytes	0.821697	1.08832	0.1	1000
PPP4R2	protein phosphatase 4 regulatory subunit 2 [Source:HGNC Symbol;Acc:HGNC:18296]	0.0353175	-0.416669	0.09	0.151	1	Naive T	All other cells	ND1_7.Neftel_2019_10x Lymphocytes	0.294651	0.498645	0.1	1000
MRPL50	mitochondrial ribosomal protein L50 [Source:HGNC Symbol;Acc:HGNC:16654]	0.0354873	-0.267843	0.072	0.113	1	Naive T	All other cells	ND1_7.Neftel_2019_10x Lymphocytes	0.228015	0.328762	0.1	1000
ZFP36L1	ZFP36 ring finger protein like 1 [Source:HGNC Symbol;Acc:HGNC:1107]	0.0355579	-0.290084	0.376	0.418	1	Naive T	All other cells	ND1_7.Neftel_2019_10x Lymphocytes	2.05198	2.7762	0.1	1000
UBE2G2	ubiquitin conjugating enzyme E2 G2 [Source:HGNC Symbol;Acc:HGNC:12483]	0.0362631	-0.279381	0.069	0.102	1	Naive T	All other cells	ND1_7.Neftel_2019_10x Lymphocytes	0.21734	0.319623	0.1	1000
PTPN1	protein tyrosine phosphatase non-receptor type 1 [Source:HGNC Symbol;Acc:HGNC:9642]	0.0365314	-0.263178	0.119	0.162	1	Naive T	All other cells	ND1_7.Neftel_2019_10x Lymphocytes	0.37928	0.523571	0.1	1000
NDUFAF3	NADH:ubiquinone oxidoreductase complex assembly factor 3 [Source:HGNC Symbol;Acc:HGNC:29918]	0.0366135	-0.273672	0.257	0.333	1	Naive T	All other cells	ND1_7.Neftel_2019_10x Lymphocytes	0.901437	1.21667	0.1	1000
MRPL48	mitochondrial ribosomal protein L48 [Source:HGNC Symbol;Acc:HGNC:16653]	0.0377048	-0.333725	0.084	0.131	1	Naive T	All other cells	ND1_7.Neftel_2019_10x Lymphocytes	0.240666	0.375624	0.1	1000
CDC42EP3	CDC42 effector protein 3 [Source:HGNC Symbol;Acc:HGNC:16943]	0.0381306	-0.298276	0.143	0.194	1	Naive T	All other cells	ND1_7.Neftel_2019_10x Lymphocytes	0.522399	0.738703	0.1	1000
MLEC	malectin [Source:HGNC Symbol;Acc:HGNC:28973]	0.0381896	-0.347776	0.09	0.143	1	Naive T	All other cells	ND1_7.Neftel_2019_10x Lymphocytes	0.294698	0.458859	0.1	1000
C1orf122	chromosome 1 open reading frame 122 [Source:HGNC Symbol;Acc:HGNC:24789]	0.0385224	-0.28566	0.104	0.148	1	Naive T	All other cells	ND1_7.Neftel_2019_10x Lymphocytes	0.332962	0.476117	0.1	1000
DDB2	damage specific DNA binding protein 2 [Source:HGNC Symbol;Acc:HGNC:2718]	0.0388045	-0.287719	0.084	0.126	1	Naive T	All other cells	ND1_7.Neftel_2019_10x Lymphocytes	0.285324	0.413785	0.1	1000
TAF15	TATA-box binding protein associated factor 15 [Source:HGNC Symbol;Acc:HGNC:11547]	0.0390069	-0.397384	0.128	0.185	1	Naive T	All other cells	ND1_7.Neftel_2019_10x Lymphocytes	0.399288	0.642904	0.1	1000
PHAX	phosphorylated adaptor for RNA export [Source:HGNC Symbol;Acc:HGNC:10241]	0.0390402	-0.326795	0.078	0.125	1	Naive T	All other cells	ND1_7.Neftel_2019_10x Lymphocytes	0.254085	0.390944	0.1	1000
SUPT3H	SPT3 homolog, SAGA and STAGA complex component [Source:HGNC Symbol;Acc:HGNC:11466]	0.0393582	-0.372173	0.087	0.122	1	Naive T	All other cells	ND1_7.Neftel_2019_10x Lymphocytes	0.259431	0.421493	0.1	1000
ZCCHC10	zinc finger CCHC-type containing 10 [Source:HGNC Symbol;Acc:HGNC:25954]	0.039437	-0.339258	0.063	0.103	1	Naive T	All other cells	ND1_7.Neftel_2019_10x Lymphocytes	0.204547	0.327555	0.1	1000
CNOT6L	CCR4-NOT transcription complex subunit 6 like [Source:HGNC Symbol;Acc:HGNC:18042]	0.0395576	-0.250978	0.173	0.223	1	Naive T	All other cells	ND1_7.Neftel_2019_10x Lymphocytes	0.654547	0.869805	0.1	1000
CTSL	cathepsin L [Source:HGNC Symbol;Acc:HGNC:2537]	0.0397512	-0.266204	0.09	0.128	1	Naive T	All other cells	ND1_7.Neftel_2019_10x Lymphocytes	0.322312	0.451117	0.1	1000
IFT20	intraflagellar transport 20 [Source:HGNC Symbol;Acc:HGNC:30989]	0.0399542	-0.280656	0.081	0.132	1	Naive T	All other cells	ND1_7.Neftel_2019_10x Lymphocytes	0.277306	0.399552	0.1	1000
KDM2A	lysine demethylase 2A [Source:HGNC Symbol;Acc:HGNC:13606]	0.040136	-0.367056	0.063	0.101	1	Naive T	All other cells	ND1_7.Neftel_2019_10x Lymphocytes	0.182943	0.308423	0.1	1000
TM2D1	TM2 domain containing 1 [Source:HGNC Symbol;Acc:HGNC:24142]	0.0403972	-0.308013	0.087	0.129	1	Naive T	All other cells	ND1_7.Neftel_2019_10x Lymphocytes	0.279329	0.41616	0.1	1000
DLD	dihydrolipoamide dehydrogenase [Source:HGNC Symbol;Acc:HGNC:2898]	0.0404086	-0.3766	0.06	0.103	1	Naive T	All other cells	ND1_7.Neftel_2019_10x Lymphocytes	0.193096	0.327135	0.1	1000
PDCD5	programmed cell death 5 [Source:HGNC Symbol;Acc:HGNC:8764]	0.0404736	-0.251454	0.29	0.353	1	Naive T	All other cells	ND1_7.Neftel_2019_10x Lymphocytes	1.02576	1.34761	0.1	1000
YDJC	YdjC chitooligosaccharide deacetylase homolog [Source:HGNC Symbol;Acc:HGNC:27158]	0.0407089	-0.259869	0.078	0.126	1	Naive T	All other cells	ND1_7.Neftel_2019_10x Lymphocytes	0.283841	0.39775	0.1	1000
KPNB1	karyopherin subunit beta 1 [Source:HGNC Symbol;Acc:HGNC:6400]	0.0407549	-0.267198	0.182	0.254	1	Naive T	All other cells	ND1_7.Neftel_2019_10x Lymphocytes	0.676179	0.913922	0.1	1000
HNRNPH2	heterogeneous nuclear ribonucleoprotein H2 [Source:HGNC Symbol;Acc:HGNC:5042]	0.0408265	-0.283654	0.099	0.139	1	Naive T	All other cells	ND1_7.Neftel_2019_10x Lymphocytes	0.300998	0.432515	0.1	1000
BHLHE40	basic helix-loop-helix family member e40 [Source:HGNC Symbol;Acc:HGNC:1046]	0.0414179	-0.359629	0.164	0.223	1	Naive T	All other cells	ND1_7.Neftel_2019_10x Lymphocytes	0.58083	0.875491	0.1	1000
CLU	clusterin [Source:HGNC Symbol;Acc:HGNC:2095]	0.0414231	-0.457122	0.099	0.141	1	Naive T	All other cells	ND1_7.Neftel_2019_10x Lymphocytes	0.548533	0.924372	0.1	1000
PET100	PET100 cytochrome c oxidase chaperone [Source:HGNC Symbol;Acc:HGNC:40038]	0.0417168	-0.299211	0.215	0.291	1	Naive T	All other cells	ND1_7.Neftel_2019_10x Lymphocytes	0.750739	1.04747	0.1	1000
RBBP7	RB binding protein 7, chromatin remodeling factor [Source:HGNC Symbol;Acc:HGNC:9890]	0.0425391	-0.337907	0.131	0.193	1	Naive T	All other cells	ND1_7.Neftel_2019_10x Lymphocytes	0.420817	0.63019	0.1	1000
DIP2A	disco interacting protein 2 homolog A [Source:HGNC Symbol;Acc:HGNC:17217]	0.0435274	-0.433937	0.069	0.115	1	Naive T	All other cells	ND1_7.Neftel_2019_10x Lymphocytes	0.246782	0.435197	0.1	1000
IQGAP2	IQ motif containing GTPase activating protein 2 [Source:HGNC Symbol;Acc:HGNC:6111]	0.0435684	-0.363481	0.137	0.197	1	Naive T	All other cells	ND1_7.Neftel_2019_10x Lymphocytes	0.461929	0.708238	0.1	1000
ACYP2	acylphosphatase 2 [Source:HGNC Symbol;Acc:HGNC:180]	0.0436593	-0.254603	0.063	0.101	1	Naive T	All other cells	ND1_7.Neftel_2019_10x Lymphocytes	0.230706	0.326594	0.1	1000
DNAJA2	DnaJ heat shock protein family (Hsp40) member A2 [Source:HGNC Symbol;Acc:HGNC:14884]	0.0442222	-0.256544	0.152	0.214	1	Naive T	All other cells	ND1_7.Neftel_2019_10x Lymphocytes	0.545387	0.734133	0.1	1000
RNF145	ring finger protein 145 [Source:HGNC Symbol;Acc:HGNC:20853]	0.0451477	-0.319789	0.119	0.172	1	Naive T	All other cells	ND1_7.Neftel_2019_10x Lymphocytes	0.38073	0.561887	0.1	1000
ITGB7	integrin subunit beta 7 [Source:HGNC Symbol;Acc:HGNC:6162]	0.0457196	-0.288893	0.176	0.247	1	Naive T	All other cells	ND1_7.Neftel_2019_10x Lymphocytes	0.621024	0.862531	0.1	1000
LRP10	LDL receptor related protein 10 [Source:HGNC Symbol;Acc:HGNC:14553]	0.0457886	-0.327262	0.146	0.202	1	Naive T	All other cells	ND1_7.Neftel_2019_10x Lymphocytes	0.448851	0.661347	0.1	1000
CD82	CD82 molecule [Source:HGNC Symbol;Acc:HGNC:6210]	0.0461378	-0.288312	0.113	0.178	1	Naive T	All other cells	ND1_7.Neftel_2019_10x Lymphocytes	0.466074	0.655241	0.1	1000
CD55	CD55 molecule (Cromer blood group) [Source:HGNC Symbol;Acc:HGNC:2665]	0.0464028	0.276957	0.272	0.226	1	Naive T	All other cells	ND1_7.Neftel_2019_10x Lymphocytes	1.15341	0.850192	0.1	1000
TMOD3	tropomodulin 3 [Source:HGNC Symbol;Acc:HGNC:11873]	0.04663	-0.325756	0.096	0.143	1	Naive T	All other cells	ND1_7.Neftel_2019_10x Lymphocytes	0.30169	0.456372	0.1	1000
LAMP2	lysosomal associated membrane protein 2 [Source:HGNC Symbol;Acc:HGNC:6501]	0.0466414	-0.263112	0.081	0.118	1	Naive T	All other cells	ND1_7.Neftel_2019_10x Lymphocytes	0.270023	0.38139	0.1	1000
MIS18BP1	MIS18 binding protein 1 [Source:HGNC Symbol;Acc:HGNC:20190]	0.046656	-0.335907	0.075	0.124	1	Naive T	All other cells	ND1_7.Neftel_2019_10x Lymphocytes	0.258566	0.401709	0.1	1000
FBL	fibrillarin [Source:HGNC Symbol;Acc:HGNC:3599]	0.0474876	0.256977	0.379	0.314	1	Naive T	All other cells	ND1_7.Neftel_2019_10x Lymphocytes	1.48834	1.1284	0.1	1000
WDR61	WD repeat domain 61 [Source:HGNC Symbol;Acc:HGNC:30300]	0.0476481	-0.285888	0.084	0.13	1	Naive T	All other cells	ND1_7.Neftel_2019_10x Lymphocytes	0.2902	0.419335	0.1	1000
SRPK2	SRSF protein kinase 2 [Source:HGNC Symbol;Acc:HGNC:11306]	0.0480552	-0.28153	0.113	0.164	1	Naive T	All other cells	ND1_7.Neftel_2019_10x Lymphocytes	0.380443	0.536662	0.1	1000
AKTIP	AKT interacting protein [Source:HGNC Symbol;Acc:HGNC:16710]	0.0492094	-0.330447	0.06	0.106	1	Naive T	All other cells	ND1_7.Neftel_2019_10x Lymphocytes	0.216593	0.340568	0.1	1000
ISCA2	iron-sulfur cluster assembly 2 [Source:HGNC Symbol;Acc:HGNC:19857]	0.0497839	-0.25413	0.104	0.151	1	Naive T	All other cells	ND1_7.Neftel_2019_10x Lymphocytes	0.352963	0.484023	0.1	1000
NUP210	nucleoporin 210 [Source:HGNC Symbol;Acc:HGNC:30052]	0.0501827	-0.271457	0.066	0.114	1	Naive T	All other cells	ND1_7.Neftel_2019_10x Lymphocytes	0.247671	0.356101	0.1	1000
SAMM50	SAMM50 sorting and assembly machinery component [Source:HGNC Symbol;Acc:HGNC:24276]	0.0510037	-0.25102	0.078	0.118	1	Naive T	All other cells	ND1_7.Neftel_2019_10x Lymphocytes	0.251652	0.351991	0.1	1000
HIGD1A	HIG1 hypoxia inducible domain family member 1A [Source:HGNC Symbol;Acc:HGNC:29527]	0.0511137	-0.352848	0.087	0.125	1	Naive T	All other cells	ND1_7.Neftel_2019_10x Lymphocytes	0.243368	0.388652	0.1	1000
TM2D3	TM2 domain containing 3 [Source:HGNC Symbol;Acc:HGNC:24128]	0.051158	-0.267936	0.09	0.138	1	Naive T	All other cells	ND1_7.Neftel_2019_10x Lymphocytes	0.321235	0.450664	0.1	1000
TGOLN2	trans-golgi network protein 2 [Source:HGNC Symbol;Acc:HGNC:15450]	0.0518773	-0.358557	0.137	0.196	1	Naive T	All other cells	ND1_7.Neftel_2019_10x Lymphocytes	0.445027	0.680077	0.1	1000
PDE7A	phosphodiesterase 7A [Source:HGNC Symbol;Acc:HGNC:8791]	0.0522047	-0.260616	0.075	0.114	1	Naive T	All other cells	ND1_7.Neftel_2019_10x Lymphocytes	0.254194	0.359647	0.1	1000
PRKCB	protein kinase C beta [Source:HGNC Symbol;Acc:HGNC:9395]	0.0527557	-0.278958	0.081	0.116	1	Naive T	All other cells	ND1_7.Neftel_2019_10x Lymphocytes	0.265995	0.383754	0.1	1000
USP47	ubiquitin specific peptidase 47 [Source:HGNC Symbol;Acc:HGNC:20076]	0.0534034	-0.284499	0.09	0.127	1	Naive T	All other cells	ND1_7.Neftel_2019_10x Lymphocytes	0.301389	0.433485	0.1	1000
SLC4A7	solute carrier family 4 member 7 [Source:HGNC Symbol;Acc:HGNC:11033]	0.0539959	-0.27607	0.066	0.105	1	Naive T	All other cells	ND1_7.Neftel_2019_10x Lymphocytes	0.257094	0.370629	0.1	1000
SMARCA2	SWI/SNF related, matrix associated, actin dependent regulator of chromatin, subfamily a, member 2 [Source:HGNC Symbol;Acc:HGNC:11098]	0.0540584	-0.270998	0.081	0.124	1	Naive T	All other cells	ND1_7.Neftel_2019_10x Lymphocytes	0.306045	0.432436	0.1	1000
ATP6V1D	ATPase H+ transporting V1 subunit D [Source:HGNC Symbol;Acc:HGNC:13527]	0.0547137	-0.28792	0.087	0.128	1	Naive T	All other cells	ND1_7.Neftel_2019_10x Lymphocytes	0.294113	0.425609	0.1	1000
XPC	XPC complex subunit, DNA damage recognition and repair factor [Source:HGNC Symbol;Acc:HGNC:12816]	0.0548669	-0.462367	0.072	0.12	1	Naive T	All other cells	ND1_7.Neftel_2019_10x Lymphocytes	0.218666	0.405986	0.1	1000
SEMA4D	semaphorin 4D [Source:HGNC Symbol;Acc:HGNC:10732]	0.055148	-0.29597	0.116	0.174	1	Naive T	All other cells	ND1_7.Neftel_2019_10x Lymphocytes	0.40765	0.5825	0.1	1000
MAEA	macrophage erythroblast attacher, E3 ubiquitin ligase [Source:HGNC Symbol;Acc:HGNC:13731]	0.0559524	-0.251839	0.063	0.101	1	Naive T	All other cells	ND1_7.Neftel_2019_10x Lymphocytes	0.212916	0.302531	0.1	1000
ASCC2	activating signal cointegrator 1 complex subunit 2 [Source:HGNC Symbol;Acc:HGNC:24103]	0.0560591	-0.273419	0.087	0.14	1	Naive T	All other cells	ND1_7.Neftel_2019_10x Lymphocytes	0.312853	0.442675	0.1	1000
PTPN18	protein tyrosine phosphatase non-receptor type 18 [Source:HGNC Symbol;Acc:HGNC:9649]	0.0581482	-0.337841	0.075	0.108	1	Naive T	All other cells	ND1_7.Neftel_2019_10x Lymphocytes	0.199824	0.320329	0.1	1000
GALT	galactose-1-phosphate uridylyltransferase [Source:HGNC Symbol;Acc:HGNC:4135]	0.0582798	0.28602	0.11	0.087	1	Naive T	All other cells	ND1_7.Neftel_2019_10x Lymphocytes	0.396573	0.27305	0.1	1000
FGFR1OP2	FGFR1 oncogene partner 2 [Source:HGNC Symbol;Acc:HGNC:23098]	0.058297	-0.269944	0.227	0.29	1	Naive T	All other cells	ND1_7.Neftel_2019_10x Lymphocytes	0.790461	1.06641	0.1	1000
BEX2	brain expressed X-linked 2 [Source:HGNC Symbol;Acc:HGNC:30933]	0.0586149	0.342491	0.14	0.095	1	Naive T	All other cells	ND1_7.Neftel_2019_10x Lymphocytes	0.541087	0.355171	0.1	1000
ISG20L2	interferon stimulated exonuclease gene 20 like 2 [Source:HGNC Symbol;Acc:HGNC:25745]	0.0588493	-0.277871	0.06	0.102	1	Naive T	All other cells	ND1_7.Neftel_2019_10x Lymphocytes	0.220318	0.322921	0.1	1000
AP3D1	adaptor related protein complex 3 subunit delta 1 [Source:HGNC Symbol;Acc:HGNC:568]	0.058881	-0.277434	0.069	0.106	1	Naive T	All other cells	ND1_7.Neftel_2019_10x Lymphocytes	0.218789	0.320718	0.1	1000
NR4A2	nuclear receptor subfamily 4 group A member 2 [Source:HGNC Symbol;Acc:HGNC:7981]	0.0590756	-0.289538	0.188	0.24	1	Naive T	All other cells	ND1_7.Neftel_2019_10x Lymphocytes	0.99921	1.36834	0.1	1000
FBXL15	F-box and leucine rich repeat protein 15 [Source:HGNC Symbol;Acc:HGNC:28155]	0.0593713	-0.362763	0.096	0.144	1	Naive T	All other cells	ND1_7.Neftel_2019_10x Lymphocytes	0.292983	0.464833	0.1	1000
DERL1	derlin 1 [Source:HGNC Symbol;Acc:HGNC:28454]	0.0594385	-0.374103	0.143	0.198	1	Naive T	All other cells	ND1_7.Neftel_2019_10x Lymphocytes	0.454277	0.705745	0.1	1000
EIF2AK1	eukaryotic translation initiation factor 2 alpha kinase 1 [Source:HGNC Symbol;Acc:HGNC:24921]	0.0601444	-0.265028	0.113	0.158	1	Naive T	All other cells	ND1_7.Neftel_2019_10x Lymphocytes	0.367265	0.509065	0.1	1000
TYROBP	transmembrane immune signaling adaptor TYROBP [Source:HGNC Symbol;Acc:HGNC:12449]	0.0605148	-0.64689	0.313	0.343	1	Naive T	All other cells	ND1_7.Neftel_2019_10x Lymphocytes	1.16873	2.32276	0.1	1000
RNF4	ring finger protein 4 [Source:HGNC Symbol;Acc:HGNC:10067]	0.06069	-0.317492	0.078	0.111	1	Naive T	All other cells	ND1_7.Neftel_2019_10x Lymphocytes	0.233713	0.358415	0.1	1000
NDUFS4	NADH:ubiquinone oxidoreductase subunit S4 [Source:HGNC Symbol;Acc:HGNC:7711]	0.0615976	-0.312859	0.14	0.196	1	Naive T	All other cells	ND1_7.Neftel_2019_10x Lymphocytes	0.428002	0.621953	0.1	1000
PERP	p53 apoptosis effector related to PMP22 [Source:HGNC Symbol;Acc:HGNC:17637]	0.0617652	-0.260797	0.099	0.147	1	Naive T	All other cells	ND1_7.Neftel_2019_10x Lymphocytes	0.336044	0.46597	0.1	1000
RHEB	Ras homolog, mTORC1 binding [Source:HGNC Symbol;Acc:HGNC:10011]	0.0625546	-0.263091	0.197	0.271	1	Naive T	All other cells	ND1_7.Neftel_2019_10x Lymphocytes	0.688151	0.925342	0.1	1000
GLUD1	glutamate dehydrogenase 1 [Source:HGNC Symbol;Acc:HGNC:4335]	0.0630178	-0.312168	0.122	0.161	1	Naive T	All other cells	ND1_7.Neftel_2019_10x Lymphocytes	0.433987	0.629632	0.1	1000
FLYWCH2	FLYWCH family member 2 [Source:HGNC Symbol;Acc:HGNC:25178]	0.065201	-0.277321	0.075	0.113	1	Naive T	All other cells	ND1_7.Neftel_2019_10x Lymphocytes	0.247933	0.359128	0.1	1000
TTC3	tetratricopeptide repeat domain 3 [Source:HGNC Symbol;Acc:HGNC:12393]	0.0674122	0.27651	0.188	0.155	1	Naive T	All other cells	ND1_7.Neftel_2019_10x Lymphocytes	0.72089	0.522585	0.1	1000
YIPF5	Yip1 domain family member 5 [Source:HGNC Symbol;Acc:HGNC:24877]	0.0690163	-0.317036	0.075	0.116	1	Naive T	All other cells	ND1_7.Neftel_2019_10x Lymphocytes	0.232893	0.35708	0.1	1000
PIGC	phosphatidylinositol glycan anchor biosynthesis class C [Source:HGNC Symbol;Acc:HGNC:8960]	0.0691052	-0.331984	0.081	0.12	1	Naive T	All other cells	ND1_7.Neftel_2019_10x Lymphocytes	0.24839	0.385562	0.1	1000
YIF1A	Yip1 interacting factor homolog A, membrane trafficking protein [Source:HGNC Symbol;Acc:HGNC:16688]	0.0691259	-0.287775	0.122	0.173	1	Naive T	All other cells	ND1_7.Neftel_2019_10x Lymphocytes	0.403711	0.571677	0.1	1000
COPS2	COP9 signalosome subunit 2 [Source:HGNC Symbol;Acc:HGNC:30747]	0.0700348	-0.272683	0.081	0.124	1	Naive T	All other cells	ND1_7.Neftel_2019_10x Lymphocytes	0.279441	0.398389	0.1	1000
ZFAND2B	zinc finger AN1-type containing 2B [Source:HGNC Symbol;Acc:HGNC:25206]	0.0705403	-0.288953	0.116	0.163	1	Naive T	All other cells	ND1_7.Neftel_2019_10x Lymphocytes	0.372546	0.530863	0.1	1000
UBL7	ubiquitin like 7 [Source:HGNC Symbol;Acc:HGNC:28221]	0.0710029	-0.328128	0.093	0.128	1	Naive T	All other cells	ND1_7.Neftel_2019_10x Lymphocytes	0.267924	0.410813	0.1	1000
CDC40	cell division cycle 40 [Source:HGNC Symbol;Acc:HGNC:17350]	0.0725118	-0.295782	0.122	0.153	1	Naive T	All other cells	ND1_7.Neftel_2019_10x Lymphocytes	0.371992	0.53444	0.1	1000
LUC7L2	LUC7 like 2, pre-mRNA splicing factor [Source:HGNC Symbol;Acc:HGNC:21608]	0.0725365	-0.265341	0.11	0.156	1	Naive T	All other cells	ND1_7.Neftel_2019_10x Lymphocytes	0.380062	0.525942	0.1	1000
PPP2R2A	protein phosphatase 2 regulatory subunit Balpha [Source:HGNC Symbol;Acc:HGNC:9304]	0.0732824	-0.288606	0.09	0.124	1	Naive T	All other cells	ND1_7.Neftel_2019_10x Lymphocytes	0.274105	0.399267	0.1	1000
DYNC1LI1	dynein cytoplasmic 1 light intermediate chain 1 [Source:HGNC Symbol;Acc:HGNC:18745]	0.0735171	-0.365212	0.063	0.11	1	Naive T	All other cells	ND1_7.Neftel_2019_10x Lymphocytes	0.194287	0.324014	0.1	1000
MRPL15	mitochondrial ribosomal protein L15 [Source:HGNC Symbol;Acc:HGNC:14054]	0.0752559	-0.314934	0.075	0.106	1	Naive T	All other cells	ND1_7.Neftel_2019_10x Lymphocytes	0.210473	0.325401	0.1	1000
SMIM7	small integral membrane protein 7 [Source:HGNC Symbol;Acc:HGNC:28419]	0.0759384	-0.320051	0.107	0.156	1	Naive T	All other cells	ND1_7.Neftel_2019_10x Lymphocytes	0.334402	0.498258	0.1	1000
MTRNR2L8	MT-RNR2 like 8 [Source:HGNC Symbol;Acc:HGNC:37165]	0.076097	-0.494514	0.087	0.12	1	Naive T	All other cells	ND1_7.Neftel_2019_10x Lymphocytes	0.356333	0.64825	0.1	1000
ARL16	ADP ribosylation factor like GTPase 16 [Source:HGNC Symbol;Acc:HGNC:27902]	0.0784238	-0.258834	0.075	0.12	1	Naive T	All other cells	ND1_7.Neftel_2019_10x Lymphocytes	0.299142	0.417056	0.1	1000
SCNM1	sodium channel modifier 1 [Source:HGNC Symbol;Acc:HGNC:23136]	0.0804435	-0.350493	0.116	0.166	1	Naive T	All other cells	ND1_7.Neftel_2019_10x Lymphocytes	0.350791	0.540019	0.1	1000
COMMD2	COMM domain containing 2 [Source:HGNC Symbol;Acc:HGNC:24993]	0.0817035	-0.282179	0.096	0.128	1	Naive T	All other cells	ND1_7.Neftel_2019_10x Lymphocytes	0.285334	0.410958	0.1	1000
RHOT2	ras homolog family member T2 [Source:HGNC Symbol;Acc:HGNC:21169]	0.0835397	-0.277511	0.096	0.143	1	Naive T	All other cells	ND1_7.Neftel_2019_10x Lymphocytes	0.325242	0.461251	0.1	1000
ANKRD11	ankyrin repeat domain 11 [Source:HGNC Symbol;Acc:HGNC:21316]	0.0844814	-0.308155	0.119	0.169	1	Naive T	All other cells	ND1_7.Neftel_2019_10x Lymphocytes	0.386589	0.562204	0.1	1000
PLEKHB2	pleckstrin homology domain containing B2 [Source:HGNC Symbol;Acc:HGNC:19236]	0.0851328	-0.293429	0.081	0.128	1	Naive T	All other cells	ND1_7.Neftel_2019_10x Lymphocytes	0.254268	0.37508	0.1	1000
TMBIM4	transmembrane BAX inhibitor motif containing 4 [Source:HGNC Symbol;Acc:HGNC:24257]	0.0859308	-0.267086	0.137	0.169	1	Naive T	All other cells	ND1_7.Neftel_2019_10x Lymphocytes	0.430502	0.592917	0.1	1000
SC5D	sterol-C5-desaturase [Source:HGNC Symbol;Acc:HGNC:10547]	0.086067	0.295324	0.104	0.081	1	Naive T	All other cells	ND1_7.Neftel_2019_10x Lymphocytes	0.417386	0.285086	0.1	1000
PFKFB3	6-phosphofructo-2-kinase/fructose-2,6-biphosphatase 3 [Source:HGNC Symbol;Acc:HGNC:8874]	0.0865007	-0.26884	0.099	0.14	1	Naive T	All other cells	ND1_7.Neftel_2019_10x Lymphocytes	0.356458	0.49725	0.1	1000
BCL7C	BAF chromatin remodeling complex subunit BCL7C [Source:HGNC Symbol;Acc:HGNC:1006]	0.0871178	-0.425557	0.075	0.126	1	Naive T	All other cells	ND1_7.Neftel_2019_10x Lymphocytes	0.220281	0.390171	0.1	1000
NDUFAF4	NADH:ubiquinone oxidoreductase complex assembly factor 4 [Source:HGNC Symbol;Acc:HGNC:21034]	0.0897121	-0.266607	0.069	0.108	1	Naive T	All other cells	ND1_7.Neftel_2019_10x Lymphocytes	0.236396	0.339174	0.1	1000
SLU7	SLU7 homolog, splicing factor [Source:HGNC Symbol;Acc:HGNC:16939]	0.091269	-0.298842	0.113	0.164	1	Naive T	All other cells	ND1_7.Neftel_2019_10x Lymphocytes	0.379382	0.54635	0.1	1000
WBP2	WW domain binding protein 2 [Source:HGNC Symbol;Acc:HGNC:12738]	0.0921014	-0.33249	0.155	0.209	1	Naive T	All other cells	ND1_7.Neftel_2019_10x Lymphocytes	0.492633	0.726388	0.1	1000
SCOC	short coiled-coil protein [Source:HGNC Symbol;Acc:HGNC:20335]	0.0933476	0.360971	0.107	0.08	1	Naive T	All other cells	ND1_7.Neftel_2019_10x Lymphocytes	0.375141	0.231173	0.1	1000
MRPL12	mitochondrial ribosomal protein L12 [Source:HGNC Symbol;Acc:HGNC:10378]	0.095787	-0.287558	0.084	0.125	1	Naive T	All other cells	ND1_7.Neftel_2019_10x Lymphocytes	0.257874	0.377106	0.1	1000
PLGRKT	plasminogen receptor with a C-terminal lysine [Source:HGNC Symbol;Acc:HGNC:23633]	0.0976963	-0.301209	0.096	0.143	1	Naive T	All other cells	ND1_7.Neftel_2019_10x Lymphocytes	0.311395	0.455998	0.1	1000
AREG	amphiregulin [Source:HGNC Symbol;Acc:HGNC:651]	0.0980341	-0.757133	0.218	0.251	1	Naive T	All other cells	ND1_7.Neftel_2019_10x Lymphocytes	1.64682	3.6245	0.1	1000
SVIP	small VCP interacting protein [Source:HGNC Symbol;Acc:HGNC:25238]	0.0985939	0.308107	0.263	0.226	1	Naive T	All other cells	ND1_7.Neftel_2019_10x Lymphocytes	1.13559	0.807955	0.1	1000
ALKBH5	alkB homolog 5, RNA demethylase [Source:HGNC Symbol;Acc:HGNC:25996]	0.107163	-0.292159	0.081	0.109	1	Naive T	All other cells	ND1_7.Neftel_2019_10x Lymphocytes	0.233799	0.347063	0.1	1000
TMEM183A	transmembrane protein 183A [Source:HGNC Symbol;Acc:HGNC:20173]	0.109764	-0.431832	0.093	0.142	1	Naive T	All other cells	ND1_7.Neftel_2019_10x Lymphocytes	0.262508	0.45829	0.1	1000
CAST	calpastatin [Source:HGNC Symbol;Acc:HGNC:1515]	0.110404	-0.264946	0.284	0.34	1	Naive T	All other cells	ND1_7.Neftel_2019_10x Lymphocytes	0.991877	1.32311	0.1	1000
KIAA1143	KIAA1143 [Source:HGNC Symbol;Acc:HGNC:29198]	0.112593	-0.298927	0.084	0.126	1	Naive T	All other cells	ND1_7.Neftel_2019_10x Lymphocytes	0.262817	0.389227	0.1	1000
ZNF331	zinc finger protein 331 [Source:HGNC Symbol;Acc:HGNC:15489]	0.11279	-0.306704	0.176	0.216	1	Naive T	All other cells	ND1_7.Neftel_2019_10x Lymphocytes	0.821679	1.15251	0.1	1000
PRMT9	protein arginine methyltransferase 9 [Source:HGNC Symbol;Acc:HGNC:25099]	0.113367	0.358108	0.146	0.11	1	Naive T	All other cells	ND1_7.Neftel_2019_10x Lymphocytes	0.577724	0.373727	0.1	1000
GRPEL1	GrpE like 1, mitochondrial [Source:HGNC Symbol;Acc:HGNC:19696]	0.114633	-0.310917	0.099	0.141	1	Naive T	All other cells	ND1_7.Neftel_2019_10x Lymphocytes	0.297837	0.442918	0.1	1000
GLIPR1	GLI pathogenesis related 1 [Source:HGNC Symbol;Acc:HGNC:17001]	0.115305	-0.271762	0.236	0.291	1	Naive T	All other cells	ND1_7.Neftel_2019_10x Lymphocytes	0.843312	1.13788	0.1	1000
MPDU1	mannose-P-dolichol utilization defect 1 [Source:HGNC Symbol;Acc:HGNC:7207]	0.115342	-0.385319	0.063	0.104	1	Naive T	All other cells	ND1_7.Neftel_2019_10x Lymphocytes	0.203571	0.346274	0.1	1000
PPP1R10	protein phosphatase 1 regulatory subunit 10 [Source:HGNC Symbol;Acc:HGNC:9284]	0.120866	-0.289039	0.093	0.133	1	Naive T	All other cells	ND1_7.Neftel_2019_10x Lymphocytes	0.308784	0.445786	0.1	1000
GIMAP6	GTPase, IMAP family member 6 [Source:HGNC Symbol;Acc:HGNC:21918]	0.127576	-0.318938	0.087	0.118	1	Naive T	All other cells	ND1_7.Neftel_2019_10x Lymphocytes	0.259771	0.394924	0.1	1000
CCDC28A	coiled-coil domain containing 28A [Source:HGNC Symbol;Acc:HGNC:21098]	0.130563	-0.294161	0.09	0.127	1	Naive T	All other cells	ND1_7.Neftel_2019_10x Lymphocytes	0.293158	0.427618	0.1	1000
GPATCH8	G-patch domain containing 8 [Source:HGNC Symbol;Acc:HGNC:29066]	0.130765	-0.297617	0.093	0.137	1	Naive T	All other cells	ND1_7.Neftel_2019_10x Lymphocytes	0.299992	0.438648	0.1	1000
IGLC2	immunoglobulin lambda constant 2 [Source:HGNC Symbol;Acc:HGNC:5856]	0.132989	-0.78373	0.075	0.105	1	Naive T	All other cells	ND1_7.Neftel_2019_10x Lymphocytes	0.231388	0.625615	0.1	1000
MED30	mediator complex subunit 30 [Source:HGNC Symbol;Acc:HGNC:23032]	0.135324	-0.291327	0.122	0.163	1	Naive T	All other cells	ND1_7.Neftel_2019_10x Lymphocytes	0.361675	0.517814	0.1	1000
VPS36	vacuolar protein sorting 36 homolog [Source:HGNC Symbol;Acc:HGNC:20312]	0.135794	-0.323123	0.101	0.141	1	Naive T	All other cells	ND1_7.Neftel_2019_10x Lymphocytes	0.326198	0.488764	0.1	1000
SBNO1	strawberry notch homolog 1 [Source:HGNC Symbol;Acc:HGNC:22973]	0.137682	-0.303292	0.072	0.105	1	Naive T	All other cells	ND1_7.Neftel_2019_10x Lymphocytes	0.217099	0.32945	0.1	1000
TMEM30A	transmembrane protein 30A [Source:HGNC Symbol;Acc:HGNC:16667]	0.138008	-0.378717	0.069	0.102	1	Naive T	All other cells	ND1_7.Neftel_2019_10x Lymphocytes	0.201884	0.340874	0.1	1000
IRF2BP2	interferon regulatory factor 2 binding protein 2 [Source:HGNC Symbol;Acc:HGNC:21729]	0.138648	-0.275709	0.101	0.143	1	Naive T	All other cells	ND1_7.Neftel_2019_10x Lymphocytes	0.345985	0.48757	0.1	1000
JMJD6	jumonji domain containing 6, arginine demethylase and lysine hydroxylase [Source:HGNC Symbol;Acc:HGNC:19355]	0.141775	-0.301487	0.125	0.169	1	Naive T	All other cells	ND1_7.Neftel_2019_10x Lymphocytes	0.401311	0.577706	0.1	1000
DNAJB1	DnaJ heat shock protein family (Hsp40) member B1 [Source:HGNC Symbol;Acc:HGNC:5270]	0.142487	-0.345384	0.481	0.498	1	Naive T	All other cells	ND1_7.Neftel_2019_10x Lymphocytes	8.01751	11.3663	0.1	1000
SLC25A38	solute carrier family 25 member 38 [Source:HGNC Symbol;Acc:HGNC:26054]	0.143804	-0.269085	0.09	0.111	1	Naive T	All other cells	ND1_7.Neftel_2019_10x Lymphocytes	0.252798	0.36173	0.1	1000
PHIP	pleckstrin homology domain interacting protein [Source:HGNC Symbol;Acc:HGNC:15673]	0.146816	-0.254263	0.146	0.186	1	Naive T	All other cells	ND1_7.Neftel_2019_10x Lymphocytes	0.488081	0.658337	0.1	1000
SMC1A	structural maintenance of chromosomes 1A [Source:HGNC Symbol;Acc:HGNC:11111]	0.147734	-0.267271	0.101	0.142	1	Naive T	All other cells	ND1_7.Neftel_2019_10x Lymphocytes	0.313213	0.43982	0.1	1000
TNFRSF18	TNF receptor superfamily member 18 [Source:HGNC Symbol;Acc:HGNC:11914]	0.154021	-0.795932	0.122	0.143	1	Naive T	All other cells	ND1_7.Neftel_2019_10x Lymphocytes	0.407227	1.02427	0.1	1000
TSR2	TSR2 ribosome maturation factor [Source:HGNC Symbol;Acc:HGNC:25455]	0.154153	-0.251305	0.11	0.142	1	Naive T	All other cells	ND1_7.Neftel_2019_10x Lymphocytes	0.350307	0.47896	0.1	1000
ALDH9A1	aldehyde dehydrogenase 9 family member A1 [Source:HGNC Symbol;Acc:HGNC:412]	0.168403	-0.29325	0.11	0.151	1	Naive T	All other cells	ND1_7.Neftel_2019_10x Lymphocytes	0.355376	0.510558	0.1	1000
FCER1G	Fc fragment of IgE receptor Ig [Source:HGNC Symbol;Acc:HGNC:3611]	0.180161	-0.582129	0.23	0.276	1	Naive T	All other cells	ND1_7.Neftel_2019_10x Lymphocytes	0.92186	1.72897	0.1	1000
SLIRP	SRA stem-loop interacting RNA binding protein [Source:HGNC Symbol;Acc:HGNC:20495]	0.189887	-0.273377	0.194	0.233	1	Naive T	All other cells	ND1_7.Neftel_2019_10x Lymphocytes	0.644098	0.878039	0.1	1000
LY96	lymphocyte antigen 96 [Source:HGNC Symbol;Acc:HGNC:17156]	0.234694	0.326456	0.104	0.074	1	Naive T	All other cells	ND1_7.Neftel_2019_10x Lymphocytes	0.378993	0.245583	0.1	1000
DGKA	diacylglycerol kinase alpha [Source:HGNC Symbol;Acc:HGNC:2849]	0.276611	0.36641	0.131	0.096	1	Naive T	All other cells	ND1_7.Neftel_2019_10x Lymphocytes	0.49946	0.315557	0.1	1000
BPTF	bromodomain PHD finger transcription factor [Source:HGNC Symbol;Acc:HGNC:3581]	0.305295	-0.264518	0.131	0.178	1	Naive T	All other cells	ND1_7.Neftel_2019_10x Lymphocytes	0.440334	0.603949	0.1	1000
HBB	hemoglobin subunit beta [Source:HGNC Symbol;Acc:HGNC:4827]	0.325703	0.303504	0.179	0.208	1	Naive T	All other cells	ND1_7.Neftel_2019_10x Lymphocytes	13.1527	9.68347	0.1	1000
FLII	FLII actin remodeling protein [Source:HGNC Symbol;Acc:HGNC:3750]	0.380567	-0.263084	0.096	0.126	1	Naive T	All other cells	ND1_7.Neftel_2019_10x Lymphocytes	0.276597	0.389928	0.1	1000
ARMCX6	armadillo repeat containing X-linked 6 [Source:HGNC Symbol;Acc:HGNC:26094]	0.41704	-0.25406	0.081	0.101	1	Naive T	All other cells	ND1_7.Neftel_2019_10x Lymphocytes	0.226764	0.32128	0.1	1000
PNPLA8	patatin like phospholipase domain containing 8 [Source:HGNC Symbol;Acc:HGNC:28900]	0.444774	0.324647	0.104	0.082	1	Naive T	All other cells	ND1_7.Neftel_2019_10x Lymphocytes	0.391637	0.255347	0.1	1000
USP3	ubiquitin specific peptidase 3 [Source:HGNC Symbol;Acc:HGNC:12626]	0.626756	-0.259013	0.087	0.113	1	Naive T	All other cells	ND1_7.Neftel_2019_10x Lymphocytes	0.266216	0.374488	0.1	1000
SOD2	superoxide dismutase 2 [Source:HGNC Symbol;Acc:HGNC:11180]	0.835796	0.284658	0.179	0.165	1	Naive T	All other cells	ND1_7.Neftel_2019_10x Lymphocytes	0.841565	0.608313	0.1	1000
H2AFJ		0.00111326	-0.324512	0.146	0.234	1	Naive T	All other cells	ND1_7.Neftel_2019_10x Lymphocytes	0.566438	0.821921	0.1	1000
TSTA3		0.000585004	-0.45728	0.113	0.203	1	Naive T	All other cells	ND1_7.Neftel_2019_10x Lymphocytes	0.375949	0.651891	0.1	1000
ILF3-AS1		0.00816745	0.326229	0.173	0.127	1	Naive T	All other cells	ND1_7.Neftel_2019_10x Lymphocytes	0.676239	0.460165	0.1	1000
FAM195B		0.000589591	-0.437752	0.11	0.204	1	Naive T	All other cells	ND1_7.Neftel_2019_10x Lymphocytes	0.420839	0.706894	0.1	1000
SQRDL		0.000218089	-0.529365	0.113	0.207	1	Naive T	All other cells	ND1_7.Neftel_2019_10x Lymphocytes	0.362414	0.685112	0.1	1000
C6orf1		0.00180679	-0.38018	0.099	0.166	1	Naive T	All other cells	ND1_7.Neftel_2019_10x Lymphocytes	0.340365	0.544055	0.1	1000
UFD1L		0.000594647	-0.371428	0.152	0.238	1	Naive T	All other cells	ND1_7.Neftel_2019_10x Lymphocytes	0.53751	0.824264	0.1	1000
RTFDC1		0.00010403	-0.410553	0.167	0.283	1	Naive T	All other cells	ND1_7.Neftel_2019_10x Lymphocytes	0.613738	0.976068	0.1	1000
ADRBK1		0.0999282	-0.317821	0.075	0.117	1	Naive T	All other cells	ND1_7.Neftel_2019_10x Lymphocytes	0.258625	0.392797	0.1	1000
C17orf62		0.0015088	-0.339048	0.146	0.228	1	Naive T	All other cells	ND1_7.Neftel_2019_10x Lymphocytes	0.514574	0.762623	0.1	1000
TARS		7.3147e-05	-0.630646	0.036	0.102	1	Naive T	All other cells	ND1_7.Neftel_2019_10x Lymphocytes	0.124195	0.321224	0.1	1000
TCEB1		0.00120659	-0.415608	0.224	0.352	1	Naive T	All other cells	ND1_7.Neftel_2019_10x Lymphocytes	0.805488	1.27208	0.1	1000
C19orf24		0.017314	-0.357961	0.2	0.27	1	Naive T	All other cells	ND1_7.Neftel_2019_10x Lymphocytes	0.624877	0.936871	0.1	1000
FAM173A		0.00308506	-0.490432	0.069	0.137	1	Naive T	All other cells	ND1_7.Neftel_2019_10x Lymphocytes	0.24065	0.456288	0.1	1000
RP11-596C23.2		0.0352891	-0.513758	0.066	0.105	1	Naive T	All other cells	ND1_7.Neftel_2019_10x Lymphocytes	0.215466	0.427321	0.1	1000
C4orf27		0.00866865	-0.345423	0.081	0.13	1	Naive T	All other cells	ND1_7.Neftel_2019_10x Lymphocytes	0.263273	0.413155	0.1	1000
H2AFY		0.0032353	-0.393122	0.221	0.291	1	Naive T	All other cells	ND1_7.Neftel_2019_10x Lymphocytes	0.698703	1.08336	0.1	1000
MESDC2		0.00162979	-0.261324	0.149	0.223	1	Naive T	All other cells	ND1_7.Neftel_2019_10x Lymphocytes	0.544546	0.737039	0.1	1000
APOPT1		0.00596072	-0.354809	0.063	0.105	1	Naive T	All other cells	ND1_7.Neftel_2019_10x Lymphocytes	0.191761	0.316024	0.1	1000
PQLC3		0.0366204	-0.344861	0.104	0.157	1	Naive T	All other cells	ND1_7.Neftel_2019_10x Lymphocytes	0.321906	0.495644	0.1	1000
H2AFX		0.0003629	-0.46549	0.045	0.105	1	Naive T	All other cells	ND1_7.Neftel_2019_10x Lymphocytes	0.212324	0.397468	0.1	1000
STRA13		0.000858722	-0.330336	0.125	0.215	1	Naive T	All other cells	ND1_7.Neftel_2019_10x Lymphocytes	0.466261	0.687916	0.1	1000
ASNA1		0.000263356	-0.374944	0.134	0.221	1	Naive T	All other cells	ND1_7.Neftel_2019_10x Lymphocytes	0.457511	0.711128	0.1	1000
C19orf66		0.00308584	-0.367807	0.164	0.248	1	Naive T	All other cells	ND1_7.Neftel_2019_10x Lymphocytes	0.657907	0.994845	0.1	1000
SEPT11		0.00517646	-0.363125	0.054	0.102	1	Naive T	All other cells	ND1_7.Neftel_2019_10x Lymphocytes	0.179568	0.301968	0.1	1000
H1FX		0.00517895	-0.342939	0.128	0.204	1	Naive T	All other cells	ND1_7.Neftel_2019_10x Lymphocytes	0.503741	0.750721	0.1	1000
ATP5I		0.000286382	-0.293166	0.421	0.516	1	Naive T	All other cells	ND1_7.Neftel_2019_10x Lymphocytes	1.65176	2.24853	0.1	1000
C11orf31		0.000205334	-0.279918	0.37	0.503	1	Naive T	All other cells	ND1_7.Neftel_2019_10x Lymphocytes	1.58525	2.12962	0.1	1000
FAM103A1		0.00142716	-0.276053	0.093	0.162	1	Naive T	All other cells	ND1_7.Neftel_2019_10x Lymphocytes	0.373109	0.523518	0.1	1000
C7orf73		0.00551158	-0.300204	0.221	0.305	1	Naive T	All other cells	ND1_7.Neftel_2019_10x Lymphocytes	0.792841	1.10546	0.1	1000
C19orf70		0.00103502	-0.296003	0.296	0.382	1	Naive T	All other cells	ND1_7.Neftel_2019_10x Lymphocytes	1.07407	1.47851	0.1	1000
PAPD4		0.000430456	-0.658774	0.042	0.103	1	Naive T	All other cells	ND1_7.Neftel_2019_10x Lymphocytes	0.13052	0.345462	0.1	1000
AIM1		0.0014492	0.377166	0.266	0.199	1	Naive T	All other cells	ND1_7.Neftel_2019_10x Lymphocytes	1.1691	0.77035	0.1	1000
ADSS		0.0108709	-0.367953	0.116	0.189	1	Naive T	All other cells	ND1_7.Neftel_2019_10x Lymphocytes	0.383209	0.598127	0.1	1000
FAM96A		0.00588991	-0.37988	0.14	0.216	1	Naive T	All other cells	ND1_7.Neftel_2019_10x Lymphocytes	0.489658	0.762144	0.1	1000
RP11-18H21.1		0.000312568	0.479545	0.137	0.075	1	Naive T	All other cells	ND1_7.Neftel_2019_10x Lymphocytes	0.5192	0.283325	0.1	1000
C16orf13		0.00575755	-0.295544	0.224	0.312	1	Naive T	All other cells	ND1_7.Neftel_2019_10x Lymphocytes	0.821334	1.13814	0.1	1000
OBFC1		0.0436027	-0.299168	0.119	0.178	1	Naive T	All other cells	ND1_7.Neftel_2019_10x Lymphocytes	0.409522	0.587211	0.1	1000
SELM		0.000117713	0.417013	0.233	0.136	1	Naive T	All other cells	ND1_7.Neftel_2019_10x Lymphocytes	0.810157	0.499805	0.1	1000
FAM105A		0.0348525	-0.391091	0.063	0.106	1	Naive T	All other cells	ND1_7.Neftel_2019_10x Lymphocytes	0.203692	0.349036	0.1	1000
MARCH7		0.0248418	-0.261642	0.093	0.137	1	Naive T	All other cells	ND1_7.Neftel_2019_10x Lymphocytes	0.313336	0.43695	0.1	1000
ERBB2IP		0.00611544	-0.498326	0.054	0.103	1	Naive T	All other cells	ND1_7.Neftel_2019_10x Lymphocytes	0.165524	0.337042	0.1	1000
ATP5G1		0.00206714	-0.27794	0.257	0.349	1	Naive T	All other cells	ND1_7.Neftel_2019_10x Lymphocytes	0.968814	1.31127	0.1	1000
RP5-1171I10.5		0.0118765	-0.358839	0.069	0.116	1	Naive T	All other cells	ND1_7.Neftel_2019_10x Lymphocytes	0.241754	0.389277	0.1	1000
TROVE2		0.00664503	-0.394286	0.116	0.175	1	Naive T	All other cells	ND1_7.Neftel_2019_10x Lymphocytes	0.377395	0.608132	0.1	1000
ATP5C1		5.6142e-05	-0.392802	0.319	0.436	1	Naive T	All other cells	ND1_7.Neftel_2019_10x Lymphocytes	1.1677	1.77763	0.1	1000
VIMP		0.00232314	-0.370284	0.134	0.218	1	Naive T	All other cells	ND1_7.Neftel_2019_10x Lymphocytes	0.483011	0.744285	0.1	1000
TMEM2		0.00018899	-0.509029	0.128	0.222	1	Naive T	All other cells	ND1_7.Neftel_2019_10x Lymphocytes	0.56692	1.00954	0.1	1000
FAM96B		0.000185241	-0.297025	0.34	0.454	1	Naive T	All other cells	ND1_7.Neftel_2019_10x Lymphocytes	1.30533	1.79137	0.1	1000
SELT		0.000140143	-0.394839	0.242	0.356	1	Naive T	All other cells	ND1_7.Neftel_2019_10x Lymphocytes	0.92528	1.42166	0.1	1000
APOA1BP		0.0581346	-0.338296	0.131	0.193	1	Naive T	All other cells	ND1_7.Neftel_2019_10x Lymphocytes	0.427792	0.640258	0.1	1000
GBAS		0.0428899	-0.274813	0.075	0.108	1	Naive T	All other cells	ND1_7.Neftel_2019_10x Lymphocytes	0.236507	0.34294	0.1	1000

## Sheet: CD4 T
gene	description	p_val	avg_logFC	pct.1	pct.2	p_val_adj	cluster.1	cluster.2	dataset	ave.norm.expr.1	ave.norm.expr.2	pseudocount	max.cells.per.ident
NKG7	natural killer cell granule protein 7 [Source:HGNC Symbol;Acc:HGNC:7830]	6.98503e-80	-2.38176	0.241	0.629	1.33267e-75	CD4 T	All other cells	ND1_7.Neftel_2019_10x Lymphocytes	1.53238	17.5688	0.1	1000
CD40LG	CD40 ligand [Source:HGNC Symbol;Acc:HGNC:11935]	1.75373e-72	1.4795	0.477	0.1	3.34594e-68	CD4 T	All other cells	ND1_7.Neftel_2019_10x Lymphocytes	3.08097	0.624467	0.1	1000
TPT1	tumor protein, translationally-controlled 1 [Source:HGNC Symbol;Acc:HGNC:12022]	9.39079e-64	0.391049	0.997	0.991	1.79167e-59	CD4 T	All other cells	ND1_7.Neftel_2019_10x Lymphocytes	78.1727	52.8395	0.1	1000
S100A4	S100 calcium binding protein A4 [Source:HGNC Symbol;Acc:HGNC:10494]	1.81351e-53	0.547729	0.959	0.822	3.45999e-49	CD4 T	All other cells	ND1_7.Neftel_2019_10x Lymphocytes	31.5216	18.1855	0.1	1000
CD8A	CD8a molecule [Source:HGNC Symbol;Acc:HGNC:1706]	2.49103e-51	-1.75583	0.066	0.389	4.75264e-47	CD4 T	All other cells	ND1_7.Neftel_2019_10x Lymphocytes	0.592128	3.90622	0.1	1000
CCL5	C-C motif chemokine ligand 5 [Source:HGNC Symbol;Acc:HGNC:10632]	1.90616e-49	-1.25415	0.662	0.765	3.63676e-45	CD4 T	All other cells	ND1_7.Neftel_2019_10x Lymphocytes	8.69415	30.7223	0.1	1000
CD8B	CD8b molecule [Source:HGNC Symbol;Acc:HGNC:1707]	2.05729e-49	-1.94257	0.054	0.37	3.9251e-45	CD4 T	All other cells	ND1_7.Neftel_2019_10x Lymphocytes	0.363634	3.13463	0.1	1000
CTSW	cathepsin W [Source:HGNC Symbol;Acc:HGNC:2546]	1.33664e-43	-1.53944	0.261	0.545	2.55017e-39	CD4 T	All other cells	ND1_7.Neftel_2019_10x Lymphocytes	1.1593	5.77086	0.1	1000
RPLP1	ribosomal protein lateral stalk subunit P1 [Source:HGNC Symbol;Acc:HGNC:10372]	2.78745e-43	0.27391	0.997	0.999	5.31818e-39	CD4 T	All other cells	ND1_7.Neftel_2019_10x Lymphocytes	126.702	96.32	0.1	1000
HLA-DPB1	major histocompatibility complex, class II, DP beta 1 [Source:HGNC Symbol;Acc:HGNC:4940]	3.73845e-43	-1.08132	0.364	0.638	7.13258e-39	CD4 T	All other cells	ND1_7.Neftel_2019_10x Lymphocytes	1.85953	5.67781	0.1	1000
IL7R	interleukin 7 receptor [Source:HGNC Symbol;Acc:HGNC:6024]	9.91866e-43	0.803702	0.757	0.403	1.89238e-38	CD4 T	All other cells	ND1_7.Neftel_2019_10x Lymphocytes	9.98647	4.4154	0.1	1000
HLA-DPA1	major histocompatibility complex, class II, DP alpha 1 [Source:HGNC Symbol;Acc:HGNC:4938]	2.26586e-38	-1.06253	0.41	0.653	4.32303e-34	CD4 T	All other cells	ND1_7.Neftel_2019_10x Lymphocytes	1.99232	5.9545	0.1	1000
CCL4	C-C motif chemokine ligand 4 [Source:HGNC Symbol;Acc:HGNC:10630]	9.33172e-38	-1.05067	0.535	0.744	1.7804e-33	CD4 T	All other cells	ND1_7.Neftel_2019_10x Lymphocytes	14.2601	40.9638	0.1	1000
KLRB1	killer cell lectin like receptor B1 [Source:HGNC Symbol;Acc:HGNC:6373]	4.02571e-37	0.89983	0.609	0.318	7.68066e-33	CD4 T	All other cells	ND1_7.Neftel_2019_10x Lymphocytes	11.748	4.71786	0.1	1000
HLA-DRB1	major histocompatibility complex, class II, DR beta 1 [Source:HGNC Symbol;Acc:HGNC:4948]	1.40041e-36	-1.18626	0.395	0.629	2.67185e-32	CD4 T	All other cells	ND1_7.Neftel_2019_10x Lymphocytes	2.10515	7.12147	0.1	1000
KLRD1	killer cell lectin like receptor D1 [Source:HGNC Symbol;Acc:HGNC:6378]	1.6225e-34	-2.37087	0.031	0.256	3.09557e-30	CD4 T	All other cells	ND1_7.Neftel_2019_10x Lymphocytes	0.116485	2.21784	0.1	1000
CST7	cystatin F [Source:HGNC Symbol;Acc:HGNC:2479]	1.18852e-33	-0.996233	0.446	0.662	2.26757e-29	CD4 T	All other cells	ND1_7.Neftel_2019_10x Lymphocytes	2.53527	7.03647	0.1	1000
CAPG	capping actin protein, gelsolin like [Source:HGNC Symbol;Acc:HGNC:1474]	7.66326e-33	0.687694	0.646	0.358	1.46207e-28	CD4 T	All other cells	ND1_7.Neftel_2019_10x Lymphocytes	3.73359	1.82728	0.1	1000
GZMH	granzyme H [Source:HGNC Symbol;Acc:HGNC:4710]	3.56371e-32	-1.21061	0.242	0.496	6.7992e-28	CD4 T	All other cells	ND1_7.Neftel_2019_10x Lymphocytes	1.58825	5.56495	0.1	1000
FTH1	ferritin heavy chain 1 [Source:HGNC Symbol;Acc:HGNC:3976]	1.02768e-29	0.338686	0.994	0.99	1.96072e-25	CD4 T	All other cells	ND1_7.Neftel_2019_10x Lymphocytes	50.3649	35.8667	0.1	1000
CD74	CD74 molecule [Source:HGNC Symbol;Acc:HGNC:1697]	5.89159e-28	-0.864807	0.876	0.919	1.12406e-23	CD4 T	All other cells	ND1_7.Neftel_2019_10x Lymphocytes	9.54703	22.8073	0.1	1000
S100A11	S100 calcium binding protein A11 [Source:HGNC Symbol;Acc:HGNC:10488]	2.53178e-27	0.41031	0.878	0.733	4.83039e-23	CD4 T	All other cells	ND1_7.Neftel_2019_10x Lymphocytes	9.00722	5.94214	0.1	1000
HLA-DRA	major histocompatibility complex, class II, DR alpha [Source:HGNC Symbol;Acc:HGNC:4947]	3.87101e-27	-0.993828	0.5	0.674	7.38549e-23	CD4 T	All other cells	ND1_7.Neftel_2019_10x Lymphocytes	2.81106	7.7644	0.1	1000
AQP3	aquaporin 3 (Gill blood group) [Source:HGNC Symbol;Acc:HGNC:636]	5.73136e-27	0.84756	0.35	0.144	1.09349e-22	CD4 T	All other cells	ND1_7.Neftel_2019_10x Lymphocytes	1.34115	0.517474	0.1	1000
JUN	Jun proto-oncogene, AP-1 transcription factor subunit [Source:HGNC Symbol;Acc:HGNC:6204]	1.4745e-26	0.79407	0.808	0.587	2.81319e-22	CD4 T	All other cells	ND1_7.Neftel_2019_10x Lymphocytes	18.0865	8.12032	0.1	1000
SH3BGRL3	SH3 domain binding glutamate rich protein like 3 [Source:HGNC Symbol;Acc:HGNC:15568]	4.26139e-26	0.280813	0.988	0.961	8.13031e-22	CD4 T	All other cells	ND1_7.Neftel_2019_10x Lymphocytes	27.2507	20.5544	0.1	1000
FLT3LG	fms related receptor tyrosine kinase 3 ligand [Source:HGNC Symbol;Acc:HGNC:3766]	4.17747e-25	0.774963	0.472	0.211	7.9702e-21	CD4 T	All other cells	ND1_7.Neftel_2019_10x Lymphocytes	1.99752	0.86637	0.1	1000
GZMK	granzyme K [Source:HGNC Symbol;Acc:HGNC:4711]	1.37437e-24	-1.1756	0.3	0.493	2.62217e-20	CD4 T	All other cells	ND1_7.Neftel_2019_10x Lymphocytes	2.54701	8.47653	0.1	1000
LTB	lymphotoxin beta [Source:HGNC Symbol;Acc:HGNC:6711]	1.60107e-24	0.652926	0.796	0.56	3.05469e-20	CD4 T	All other cells	ND1_7.Neftel_2019_10x Lymphocytes	15.6145	8.0797	0.1	1000
FXYD5	FXYD domain containing ion transport regulator 5 [Source:HGNC Symbol;Acc:HGNC:4029]	1.9589e-24	0.375571	0.907	0.756	3.73739e-20	CD4 T	All other cells	ND1_7.Neftel_2019_10x Lymphocytes	8.49564	5.80431	0.1	1000
VIM	vimentin [Source:HGNC Symbol;Acc:HGNC:12692]	1.56251e-22	0.33985	0.971	0.905	2.98111e-18	CD4 T	All other cells	ND1_7.Neftel_2019_10x Lymphocytes	22.4493	15.9523	0.1	1000
FBLN7	fibulin 7 [Source:HGNC Symbol;Acc:HGNC:26740]	4.48891e-22	1.0767	0.165	0.032	8.5644e-18	CD4 T	All other cells	ND1_7.Neftel_2019_10x Lymphocytes	0.548125	0.120829	0.1	1000
CD4	CD4 molecule [Source:HGNC Symbol;Acc:HGNC:1678]	4.98144e-22	0.772221	0.312	0.121	9.50409e-18	CD4 T	All other cells	ND1_7.Neftel_2019_10x Lymphocytes	1.07611	0.443347	0.1	1000
CCL20	C-C motif chemokine ligand 20 [Source:HGNC Symbol;Acc:HGNC:10619]	1.00548e-21	1.1067	0.165	0.032	1.91835e-17	CD4 T	All other cells	ND1_7.Neftel_2019_10x Lymphocytes	0.616974	0.137067	0.1	1000
PRF1	perforin 1 [Source:HGNC Symbol;Acc:HGNC:9360]	1.23327e-21	-1.17555	0.21	0.414	2.35296e-17	CD4 T	All other cells	ND1_7.Neftel_2019_10x Lymphocytes	0.885755	3.09376	0.1	1000
CREM	cAMP responsive element modulator [Source:HGNC Symbol;Acc:HGNC:2352]	1.38749e-21	0.629672	0.605	0.365	2.64719e-17	CD4 T	All other cells	ND1_7.Neftel_2019_10x Lymphocytes	4.91114	2.56977	0.1	1000
CTSL	cathepsin L [Source:HGNC Symbol;Acc:HGNC:2537]	4.00929e-21	1.01315	0.23	0.08	7.64932e-17	CD4 T	All other cells	ND1_7.Neftel_2019_10x Lymphocytes	0.881132	0.256224	0.1	1000
IL4I1	interleukin 4 induced 1 [Source:HGNC Symbol;Acc:HGNC:19094]	6.51825e-21	1.22227	0.143	0.024	1.24362e-16	CD4 T	All other cells	ND1_7.Neftel_2019_10x Lymphocytes	0.525022	0.0841073	0.1	1000
KLF6	Kruppel like factor 6 [Source:HGNC Symbol;Acc:HGNC:2235]	8.45737e-21	0.45915	0.843	0.68	1.61358e-16	CD4 T	All other cells	ND1_7.Neftel_2019_10x Lymphocytes	10.0573	6.31756	0.1	1000
TNFSF13B	TNF superfamily member 13b [Source:HGNC Symbol;Acc:HGNC:11929]	1.82463e-20	1.02365	0.22	0.06	3.48121e-16	CD4 T	All other cells	ND1_7.Neftel_2019_10x Lymphocytes	0.956993	0.279758	0.1	1000
DPP4	dipeptidyl peptidase 4 [Source:HGNC Symbol;Acc:HGNC:3009]	4.2236e-20	0.952571	0.203	0.058	8.05821e-16	CD4 T	All other cells	ND1_7.Neftel_2019_10x Lymphocytes	0.620217	0.177822	0.1	1000
ZNF683	zinc finger protein 683 [Source:HGNC Symbol;Acc:HGNC:28495]	4.77656e-20	-1.53322	0.038	0.189	9.1132e-16	CD4 T	All other cells	ND1_7.Neftel_2019_10x Lymphocytes	0.191285	1.24954	0.1	1000
SPOCK2	SPARC (osteonectin), cwcv and kazal like domains proteoglycan 2 [Source:HGNC Symbol;Acc:HGNC:13564]	5.3566e-20	0.570213	0.593	0.346	1.02199e-15	CD4 T	All other cells	ND1_7.Neftel_2019_10x Lymphocytes	3.00028	1.65291	0.1	1000
ANXA1	annexin A1 [Source:HGNC Symbol;Acc:HGNC:533]	6.02892e-20	0.472782	0.781	0.522	1.15026e-15	CD4 T	All other cells	ND1_7.Neftel_2019_10x Lymphocytes	6.41552	3.9609	0.1	1000
HLA-DRB5	major histocompatibility complex, class II, DR beta 5 [Source:HGNC Symbol;Acc:HGNC:4953]	1.26216e-19	-1.44049	0.076	0.237	2.40808e-15	CD4 T	All other cells	ND1_7.Neftel_2019_10x Lymphocytes	0.415931	2.07866	0.1	1000
HLA-DQA1	major histocompatibility complex, class II, DQ alpha 1 [Source:HGNC Symbol;Acc:HGNC:4942]	2.1529e-19	-1.75722	0.034	0.194	4.10752e-15	CD4 T	All other cells	ND1_7.Neftel_2019_10x Lymphocytes	0.104648	1.08621	0.1	1000
XCL2	X-C motif chemokine ligand 2 [Source:HGNC Symbol;Acc:HGNC:10646]	3.18271e-19	-1.97687	0.035	0.175	6.0723e-15	CD4 T	All other cells	ND1_7.Neftel_2019_10x Lymphocytes	0.205144	2.10317	0.1	1000
GPR183	G protein-coupled receptor 183 [Source:HGNC Symbol;Acc:HGNC:3128]	3.37415e-19	0.628473	0.551	0.328	6.43754e-15	CD4 T	All other cells	ND1_7.Neftel_2019_10x Lymphocytes	3.36598	1.74877	0.1	1000
CD69	CD69 molecule [Source:HGNC Symbol;Acc:HGNC:1694]	1.21616e-18	0.50013	0.886	0.765	2.32032e-14	CD4 T	All other cells	ND1_7.Neftel_2019_10x Lymphocytes	16.231	9.80396	0.1	1000
IL2	interleukin 2 [Source:HGNC Symbol;Acc:HGNC:6001]	2.27223e-17	1.35294	0.15	0.032	4.33519e-13	CD4 T	All other cells	ND1_7.Neftel_2019_10x Lymphocytes	2.85995	0.665086	0.1	1000
CTSH	cathepsin H [Source:HGNC Symbol;Acc:HGNC:2535]	2.71884e-17	0.816227	0.236	0.1	5.18728e-13	CD4 T	All other cells	ND1_7.Neftel_2019_10x Lymphocytes	0.88599	0.335903	0.1	1000
LAPTM5	lysosomal protein transmembrane 5 [Source:HGNC Symbol;Acc:HGNC:29612]	2.88669e-17	0.303854	0.911	0.779	5.50751e-13	CD4 T	All other cells	ND1_7.Neftel_2019_10x Lymphocytes	7.93542	5.82989	0.1	1000
CORO1B	coronin 1B [Source:HGNC Symbol;Acc:HGNC:2253]	4.05942e-17	0.528433	0.534	0.343	7.74496e-13	CD4 T	All other cells	ND1_7.Neftel_2019_10x Lymphocytes	2.90031	1.66877	0.1	1000
HLA-DQB1	major histocompatibility complex, class II, DQ beta 1 [Source:HGNC Symbol;Acc:HGNC:4944]	7.13201e-17	-1.14565	0.114	0.279	1.36072e-12	CD4 T	All other cells	ND1_7.Neftel_2019_10x Lymphocytes	0.399497	1.47066	0.1	1000
RORA	RAR related orphan receptor A [Source:HGNC Symbol;Acc:HGNC:10258]	7.78644e-17	0.632353	0.427	0.239	1.48558e-12	CD4 T	All other cells	ND1_7.Neftel_2019_10x Lymphocytes	1.82877	0.924833	0.1	1000
FKBP11	FKBP prolyl isomerase 11 [Source:HGNC Symbol;Acc:HGNC:18624]	1.38446e-16	0.622894	0.448	0.258	2.6414e-12	CD4 T	All other cells	ND1_7.Neftel_2019_10x Lymphocytes	1.92207	0.984619	0.1	1000
ZFP36L2	ZFP36 ring finger protein like 2 [Source:HGNC Symbol;Acc:HGNC:1108]	3.6397e-16	0.361659	0.936	0.882	6.94418e-12	CD4 T	All other cells	ND1_7.Neftel_2019_10x Lymphocytes	23.3486	16.2324	0.1	1000
MAL	mal, T cell differentiation protein [Source:HGNC Symbol;Acc:HGNC:6817]	3.97955e-16	0.685714	0.226	0.085	7.59259e-12	CD4 T	All other cells	ND1_7.Neftel_2019_10x Lymphocytes	0.810367	0.358579	0.1	1000
CD38	CD38 molecule [Source:HGNC Symbol;Acc:HGNC:1667]	3.71388e-15	-1.2562	0.028	0.128	7.08572e-11	CD4 T	All other cells	ND1_7.Neftel_2019_10x Lymphocytes	0.085556	0.55168	0.1	1000
TNFAIP3	TNF alpha induced protein 3 [Source:HGNC Symbol;Acc:HGNC:11896]	5.01764e-15	0.51295	0.647	0.45	9.57315e-11	CD4 T	All other cells	ND1_7.Neftel_2019_10x Lymphocytes	5.63165	3.33169	0.1	1000
PERP	p53 apoptosis effector related to PMP22 [Source:HGNC Symbol;Acc:HGNC:17637]	5.31201e-15	0.761474	0.232	0.104	1.01348e-10	CD4 T	All other cells	ND1_7.Neftel_2019_10x Lymphocytes	0.786701	0.314069	0.1	1000
FGFBP2	fibroblast growth factor binding protein 2 [Source:HGNC Symbol;Acc:HGNC:29451]	5.54384e-15	-2.23744	0.007	0.102	1.05771e-10	CD4 T	All other cells	ND1_7.Neftel_2019_10x Lymphocytes	0.0332783	1.14872	0.1	1000
PLEK	pleckstrin [Source:HGNC Symbol;Acc:HGNC:9070]	5.63809e-15	-1.20756	0.036	0.153	1.07569e-10	CD4 T	All other cells	ND1_7.Neftel_2019_10x Lymphocytes	0.130919	0.672499	0.1	1000
PDE4D	phosphodiesterase 4D [Source:HGNC Symbol;Acc:HGNC:8783]	6.85398e-15	0.769806	0.252	0.109	1.30767e-10	CD4 T	All other cells	ND1_7.Neftel_2019_10x Lymphocytes	0.963344	0.392438	0.1	1000
PBX4	PBX homeobox 4 [Source:HGNC Symbol;Acc:HGNC:13403]	8.65478e-15	0.741965	0.182	0.066	1.65124e-10	CD4 T	All other cells	ND1_7.Neftel_2019_10x Lymphocytes	0.609386	0.237793	0.1	1000
CKLF	chemokine like factor [Source:HGNC Symbol;Acc:HGNC:13253]	1.25971e-14	0.50391	0.573	0.398	2.40341e-10	CD4 T	All other cells	ND1_7.Neftel_2019_10x Lymphocytes	3.61816	2.14638	0.1	1000
TNFRSF25	TNF receptor superfamily member 25 [Source:HGNC Symbol;Acc:HGNC:11910]	2.59257e-14	0.695265	0.223	0.093	4.94637e-10	CD4 T	All other cells	ND1_7.Neftel_2019_10x Lymphocytes	0.744124	0.321169	0.1	1000
GZMB	granzyme B [Source:HGNC Symbol;Acc:HGNC:4709]	2.90604e-14	-1.1781	0.194	0.336	5.54443e-10	CD4 T	All other cells	ND1_7.Neftel_2019_10x Lymphocytes	1.85737	6.25795	0.1	1000
SLAMF1	signaling lymphocytic activation molecule family member 1 [Source:HGNC Symbol;Acc:HGNC:10903]	2.91225e-14	0.68064	0.255	0.106	5.55628e-10	CD4 T	All other cells	ND1_7.Neftel_2019_10x Lymphocytes	0.945123	0.429138	0.1	1000
CD2	CD2 molecule [Source:HGNC Symbol;Acc:HGNC:1639]	3.05308e-14	0.335151	0.905	0.772	5.82498e-10	CD4 T	All other cells	ND1_7.Neftel_2019_10x Lymphocytes	11.1958	7.97908	0.1	1000
ADAM19	ADAM metallopeptidase domain 19 [Source:HGNC Symbol;Acc:HGNC:197]	3.20627e-14	0.851926	0.165	0.056	6.11724e-10	CD4 T	All other cells	ND1_7.Neftel_2019_10x Lymphocytes	0.567306	0.184668	0.1	1000
DUSP1	dual specificity phosphatase 1 [Source:HGNC Symbol;Acc:HGNC:3064]	4.91109e-14	0.431247	0.87	0.781	9.36987e-10	CD4 T	All other cells	ND1_7.Neftel_2019_10x Lymphocytes	17.7547	11.5002	0.1	1000
STMN1	stathmin 1 [Source:HGNC Symbol;Acc:HGNC:6510]	5.08651e-14	-1.18299	0.131	0.263	9.70455e-10	CD4 T	All other cells	ND1_7.Neftel_2019_10x Lymphocytes	0.513271	1.9018	0.1	1000
SLC39A8	solute carrier family 39 member 8 [Source:HGNC Symbol;Acc:HGNC:20862]	5.2877e-14	0.773127	0.141	0.044	1.00884e-09	CD4 T	All other cells	ND1_7.Neftel_2019_10x Lymphocytes	0.421732	0.140814	0.1	1000
PLA2G16		9.62209e-14	-0.822039	0.114	0.251	1.8358e-09	CD4 T	All other cells	ND1_7.Neftel_2019_10x Lymphocytes	0.370139	0.96963	0.1	1000
GNA15	G protein subunit alpha 15 [Source:HGNC Symbol;Acc:HGNC:4383]	9.78289e-14	0.949541	0.13	0.034	1.86648e-09	CD4 T	All other cells	ND1_7.Neftel_2019_10x Lymphocytes	0.42529	0.103244	0.1	1000
TRGC2	T cell receptor gamma constant 2 [Source:HGNC Symbol;Acc:HGNC:12276]	3.20738e-13	-1.07603	0.061	0.18	6.11936e-09	CD4 T	All other cells	ND1_7.Neftel_2019_10x Lymphocytes	0.286632	1.034	0.1	1000
SH2D2A	SH2 domain containing 2A [Source:HGNC Symbol;Acc:HGNC:10821]	3.44302e-13	0.393856	0.468	0.309	6.56894e-09	CD4 T	All other cells	ND1_7.Neftel_2019_10x Lymphocytes	2.14602	1.41483	0.1	1000
S100A10	S100 calcium binding protein A10 [Source:HGNC Symbol;Acc:HGNC:10487]	4.8648e-13	0.284016	0.892	0.782	9.28156e-09	CD4 T	All other cells	ND1_7.Neftel_2019_10x Lymphocytes	8.6095	6.45612	0.1	1000
CISH	cytokine inducible SH2 containing protein [Source:HGNC Symbol;Acc:HGNC:1984]	5.66417e-13	0.506706	0.324	0.171	1.08067e-08	CD4 T	All other cells	ND1_7.Neftel_2019_10x Lymphocytes	1.41106	0.810379	0.1	1000
NCF1	neutrophil cytosolic factor 1 [Source:HGNC Symbol;Acc:HGNC:7660]	9.5783e-13	0.42227	0.449	0.287	1.82744e-08	CD4 T	All other cells	ND1_7.Neftel_2019_10x Lymphocytes	1.86482	1.18805	0.1	1000
HLA-DMA	major histocompatibility complex, class II, DM alpha [Source:HGNC Symbol;Acc:HGNC:4934]	1.41065e-12	-0.762426	0.157	0.295	2.69138e-08	CD4 T	All other cells	ND1_7.Neftel_2019_10x Lymphocytes	0.524664	1.23895	0.1	1000
CCDC107	coiled-coil domain containing 107 [Source:HGNC Symbol;Acc:HGNC:28465]	2.59379e-12	0.460965	0.446	0.284	4.94869e-08	CD4 T	All other cells	ND1_7.Neftel_2019_10x Lymphocytes	1.77762	1.08417	0.1	1000
CRTAM	cytotoxic and regulatory T cell molecule [Source:HGNC Symbol;Acc:HGNC:24313]	3.114e-12	-1.32069	0.015	0.101	5.9412e-08	CD4 T	All other cells	ND1_7.Neftel_2019_10x Lymphocytes	0.079686	0.573106	0.1	1000
GNLY	granulysin [Source:HGNC Symbol;Acc:HGNC:4414]	3.2409e-12	-1.67739	0.102	0.239	6.18332e-08	CD4 T	All other cells	ND1_7.Neftel_2019_10x Lymphocytes	1.97146	10.9856	0.1	1000
MATK	megakaryocyte-associated tyrosine kinase [Source:HGNC Symbol;Acc:HGNC:6906]	3.25621e-12	-0.944408	0.096	0.233	6.21253e-08	CD4 T	All other cells	ND1_7.Neftel_2019_10x Lymphocytes	0.318198	0.975308	0.1	1000
MAF	MAF bZIP transcription factor [Source:HGNC Symbol;Acc:HGNC:6776]	3.41357e-12	0.554179	0.274	0.143	6.51275e-08	CD4 T	All other cells	ND1_7.Neftel_2019_10x Lymphocytes	1.02532	0.546548	0.1	1000
FABP5	fatty acid binding protein 5 [Source:HGNC Symbol;Acc:HGNC:3560]	5.11596e-12	-0.857273	0.136	0.262	9.76073e-08	CD4 T	All other cells	ND1_7.Neftel_2019_10x Lymphocytes	0.445332	1.1852	0.1	1000
GSTP1	glutathione S-transferase pi 1 [Source:HGNC Symbol;Acc:HGNC:4638]	1.05833e-11	-0.64223	0.469	0.58	2.01919e-07	CD4 T	All other cells	ND1_7.Neftel_2019_10x Lymphocytes	2.01092	3.91225	0.1	1000
PIM1	Pim-1 proto-oncogene, serine/threonine kinase [Source:HGNC Symbol;Acc:HGNC:8986]	1.14312e-11	0.452919	0.471	0.308	2.18096e-07	CD4 T	All other cells	ND1_7.Neftel_2019_10x Lymphocytes	2.16243	1.33839	0.1	1000
PBXIP1	PBX homeobox interacting protein 1 [Source:HGNC Symbol;Acc:HGNC:21199]	1.41592e-11	0.523834	0.364	0.198	2.70143e-07	CD4 T	All other cells	ND1_7.Neftel_2019_10x Lymphocytes	1.38144	0.777378	0.1	1000
CCR6	C-C motif chemokine receptor 6 [Source:HGNC Symbol;Acc:HGNC:1607]	2.09065e-11	0.735485	0.163	0.063	3.98875e-07	CD4 T	All other cells	ND1_7.Neftel_2019_10x Lymphocytes	0.59757	0.234326	0.1	1000
AOAH	acyloxyacyl hydrolase [Source:HGNC Symbol;Acc:HGNC:548]	2.32279e-11	-1.05227	0.042	0.141	4.43165e-07	CD4 T	All other cells	ND1_7.Neftel_2019_10x Lymphocytes	0.123803	0.541008	0.1	1000
CDKN1A	cyclin dependent kinase inhibitor 1A [Source:HGNC Symbol;Acc:HGNC:1784]	4.4299e-11	0.690044	0.2	0.085	8.4518e-07	CD4 T	All other cells	ND1_7.Neftel_2019_10x Lymphocytes	0.936738	0.41998	0.1	1000
TESPA1	thymocyte expressed, positive selection associated 1 [Source:HGNC Symbol;Acc:HGNC:29109]	4.44409e-11	0.605239	0.171	0.085	8.47887e-07	CD4 T	All other cells	ND1_7.Neftel_2019_10x Lymphocytes	0.567736	0.264546	0.1	1000
NFKBIA	NFKB inhibitor alpha [Source:HGNC Symbol;Acc:HGNC:7797]	4.5741e-11	0.526855	0.697	0.535	8.72692e-07	CD4 T	All other cells	ND1_7.Neftel_2019_10x Lymphocytes	8.76254	5.13297	0.1	1000
STK17B	serine/threonine kinase 17b [Source:HGNC Symbol;Acc:HGNC:11396]	7.93362e-11	0.375063	0.652	0.48	1.51365e-06	CD4 T	All other cells	ND1_7.Neftel_2019_10x Lymphocytes	3.59153	2.43699	0.1	1000
ERN1	endoplasmic reticulum to nucleus signaling 1 [Source:HGNC Symbol;Acc:HGNC:3449]	8.01587e-11	0.550897	0.265	0.133	1.52935e-06	CD4 T	All other cells	ND1_7.Neftel_2019_10x Lymphocytes	1.03719	0.555514	0.1	1000
CD6	CD6 molecule [Source:HGNC Symbol;Acc:HGNC:1691]	8.53463e-11	0.461979	0.462	0.288	1.62832e-06	CD4 T	All other cells	ND1_7.Neftel_2019_10x Lymphocytes	2.05061	1.25496	0.1	1000
GZMA	granzyme A [Source:HGNC Symbol;Acc:HGNC:4708]	1.00713e-10	-0.481176	0.628	0.689	1.9215e-06	CD4 T	All other cells	ND1_7.Neftel_2019_10x Lymphocytes	7.79417	12.6726	0.1	1000
C19orf70		2.14798e-10	0.393058	0.478	0.327	4.09813e-06	CD4 T	All other cells	ND1_7.Neftel_2019_10x Lymphocytes	1.88486	1.23976	0.1	1000
G3BP2	G3BP stress granule assembly factor 2 [Source:HGNC Symbol;Acc:HGNC:30291]	2.26934e-10	0.424965	0.405	0.255	4.32968e-06	CD4 T	All other cells	ND1_7.Neftel_2019_10x Lymphocytes	1.60075	1.01194	0.1	1000
TMEM173		2.50417e-10	0.567333	0.335	0.19	4.77771e-06	CD4 T	All other cells	ND1_7.Neftel_2019_10x Lymphocytes	1.28792	0.686998	0.1	1000
BCL2	BCL2 apoptosis regulator [Source:HGNC Symbol;Acc:HGNC:990]	2.96238e-10	0.487564	0.306	0.174	5.65193e-06	CD4 T	All other cells	ND1_7.Neftel_2019_10x Lymphocytes	1.14355	0.663689	0.1	1000
DDAH2	dimethylarginine dimethylaminohydrolase 2 [Source:HGNC Symbol;Acc:HGNC:2716]	3.26395e-10	0.641455	0.235	0.119	6.22729e-06	CD4 T	All other cells	ND1_7.Neftel_2019_10x Lymphocytes	0.859193	0.40504	0.1	1000
NCF4	neutrophil cytosolic factor 4 [Source:HGNC Symbol;Acc:HGNC:7662]	3.77905e-10	0.700013	0.224	0.107	7.21004e-06	CD4 T	All other cells	ND1_7.Neftel_2019_10x Lymphocytes	0.763782	0.328936	0.1	1000
IFNGR1	interferon gamma receptor 1 [Source:HGNC Symbol;Acc:HGNC:5439]	4.64162e-10	0.546364	0.319	0.182	8.85574e-06	CD4 T	All other cells	ND1_7.Neftel_2019_10x Lymphocytes	1.24934	0.681336	0.1	1000
CCL4L2	C-C motif chemokine ligand 4 like 2 [Source:HGNC Symbol;Acc:HGNC:24066]	7.5143e-10	-1.72066	0.357	0.466	1.43365e-05	CD4 T	All other cells	ND1_7.Neftel_2019_10x Lymphocytes	2.68396	15.4574	0.1	1000
CXCR4	C-X-C motif chemokine receptor 4 [Source:HGNC Symbol;Acc:HGNC:2561]	8.16988e-10	0.279412	0.921	0.9	1.55873e-05	CD4 T	All other cells	ND1_7.Neftel_2019_10x Lymphocytes	23.0968	17.4421	0.1	1000
CH17-373J23.1		8.76342e-10	0.817016	0.124	0.042	1.67197e-05	CD4 T	All other cells	ND1_7.Neftel_2019_10x Lymphocytes	0.465526	0.14982	0.1	1000
PTGER2	prostaglandin E receptor 2 [Source:HGNC Symbol;Acc:HGNC:9594]	9.28545e-10	0.527332	0.376	0.217	1.77157e-05	CD4 T	All other cells	ND1_7.Neftel_2019_10x Lymphocytes	1.60194	0.904445	0.1	1000
CLPP	caseinolytic mitochondrial matrix peptidase proteolytic subunit [Source:HGNC Symbol;Acc:HGNC:2084]	1.12528e-09	0.398216	0.411	0.272	2.14692e-05	CD4 T	All other cells	ND1_7.Neftel_2019_10x Lymphocytes	1.523	0.989876	0.1	1000
ANTXR2	ANTXR cell adhesion molecule 2 [Source:HGNC Symbol;Acc:HGNC:21732]	1.12983e-09	0.769789	0.133	0.042	2.1556e-05	CD4 T	All other cells	ND1_7.Neftel_2019_10x Lymphocytes	0.423598	0.142484	0.1	1000
SARAF	store-operated calcium entry associated regulatory factor [Source:HGNC Symbol;Acc:HGNC:28789]	1.72806e-09	0.259642	0.876	0.77	3.29696e-05	CD4 T	All other cells	ND1_7.Neftel_2019_10x Lymphocytes	10.7225	8.2477	0.1	1000
JUNB	JunB proto-oncogene, AP-1 transcription factor subunit [Source:HGNC Symbol;Acc:HGNC:6205]	1.88129e-09	0.349852	0.891	0.788	3.58931e-05	CD4 T	All other cells	ND1_7.Neftel_2019_10x Lymphocytes	30.3045	21.3288	0.1	1000
ZEB2	zinc finger E-box binding homeobox 2 [Source:HGNC Symbol;Acc:HGNC:14881]	2.0869e-09	-0.901147	0.035	0.117	3.9816e-05	CD4 T	All other cells	ND1_7.Neftel_2019_10x Lymphocytes	0.116409	0.432892	0.1	1000
YWHAQ	tyrosine 3-monooxygenase/tryptophan 5-monooxygenase activation protein theta [Source:HGNC Symbol;Acc:HGNC:12854]	2.10194e-09	0.322241	0.573	0.435	4.01028e-05	CD4 T	All other cells	ND1_7.Neftel_2019_10x Lymphocytes	2.78267	1.98856	0.1	1000
DOCK10	dedicator of cytokinesis 10 [Source:HGNC Symbol;Acc:HGNC:23479]	2.15671e-09	0.480991	0.217	0.12	4.1148e-05	CD4 T	All other cells	ND1_7.Neftel_2019_10x Lymphocytes	0.71723	0.405187	0.1	1000
CD5	CD5 molecule [Source:HGNC Symbol;Acc:HGNC:1685]	3.14205e-09	0.336744	0.344	0.206	5.99471e-05	CD4 T	All other cells	ND1_7.Neftel_2019_10x Lymphocytes	1.35896	0.941835	0.1	1000
PTGER4	prostaglandin E receptor 4 [Source:HGNC Symbol;Acc:HGNC:9596]	3.59177e-09	0.466482	0.437	0.279	6.85273e-05	CD4 T	All other cells	ND1_7.Neftel_2019_10x Lymphocytes	2.02135	1.23052	0.1	1000
TIMP1	TIMP metallopeptidase inhibitor 1 [Source:HGNC Symbol;Acc:HGNC:11820]	3.83514e-09	0.599454	0.348	0.222	7.31707e-05	CD4 T	All other cells	ND1_7.Neftel_2019_10x Lymphocytes	1.79895	0.942733	0.1	1000
CIB1	calcium and integrin binding 1 [Source:HGNC Symbol;Acc:HGNC:16920]	6.94884e-09	0.285038	0.713	0.58	0.000132577	CD4 T	All other cells	ND1_7.Neftel_2019_10x Lymphocytes	3.91571	2.91976	0.1	1000
TOX	thymocyte selection associated high mobility group box [Source:HGNC Symbol;Acc:HGNC:18988]	7.62957e-09	-0.78888	0.048	0.14	0.000145565	CD4 T	All other cells	ND1_7.Neftel_2019_10x Lymphocytes	0.199073	0.55824	0.1	1000
TRADD	TNFRSF1A associated via death domain [Source:HGNC Symbol;Acc:HGNC:12030]	7.71273e-09	0.360604	0.392	0.27	0.000147151	CD4 T	All other cells	ND1_7.Neftel_2019_10x Lymphocytes	1.4418	0.975026	0.1	1000
MOSPD3	motile sperm domain containing 3 [Source:HGNC Symbol;Acc:HGNC:25078]	8.79702e-09	0.444996	0.213	0.121	0.000167838	CD4 T	All other cells	ND1_7.Neftel_2019_10x Lymphocytes	0.655222	0.383966	0.1	1000
STAT4	signal transducer and activator of transcription 4 [Source:HGNC Symbol;Acc:HGNC:11365]	9.93543e-09	0.462435	0.335	0.199	0.000189558	CD4 T	All other cells	ND1_7.Neftel_2019_10x Lymphocytes	1.24305	0.745783	0.1	1000
MGAT4A	alpha-1,3-mannosyl-glycoprotein 4-beta-N-acetylglucosaminyltransferase A [Source:HGNC Symbol;Acc:HGNC:7047]	1.09033e-08	0.357274	0.343	0.225	0.000208024	CD4 T	All other cells	ND1_7.Neftel_2019_10x Lymphocytes	1.31571	0.890406	0.1	1000
HSPB1	heat shock protein family B (small) member 1 [Source:HGNC Symbol;Acc:HGNC:5246]	1.11458e-08	0.265339	0.448	0.32	0.000212651	CD4 T	All other cells	ND1_7.Neftel_2019_10x Lymphocytes	2.6061	1.97544	0.1	1000
CD82	CD82 molecule [Source:HGNC Symbol;Acc:HGNC:6210]	1.14664e-08	0.434895	0.248	0.138	0.000218767	CD4 T	All other cells	ND1_7.Neftel_2019_10x Lymphocytes	0.875649	0.531569	0.1	1000
LGALS3	galectin 3 [Source:HGNC Symbol;Acc:HGNC:6563]	1.38655e-08	0.285214	0.459	0.327	0.000264539	CD4 T	All other cells	ND1_7.Neftel_2019_10x Lymphocytes	2.17793	1.61267	0.1	1000
BHLHE40	basic helix-loop-helix family member e40 [Source:HGNC Symbol;Acc:HGNC:1046]	1.39183e-08	0.563201	0.313	0.176	0.000265547	CD4 T	All other cells	ND1_7.Neftel_2019_10x Lymphocytes	1.25192	0.669761	0.1	1000
SNX9	sorting nexin 9 [Source:HGNC Symbol;Acc:HGNC:14973]	1.49037e-08	0.597704	0.13	0.063	0.000284348	CD4 T	All other cells	ND1_7.Neftel_2019_10x Lymphocytes	0.437529	0.19568	0.1	1000
PSMB9	proteasome 20S subunit beta 9 [Source:HGNC Symbol;Acc:HGNC:9546]	1.6318e-08	-0.343826	0.692	0.705	0.000311331	CD4 T	All other cells	ND1_7.Neftel_2019_10x Lymphocytes	3.77378	5.36332	0.1	1000
IL18R1	interleukin 18 receptor 1 [Source:HGNC Symbol;Acc:HGNC:5988]	1.72915e-08	0.67653	0.121	0.04	0.000329905	CD4 T	All other cells	ND1_7.Neftel_2019_10x Lymphocytes	0.375501	0.141734	0.1	1000
CDK5RAP1	CDK5 regulatory subunit associated protein 1 [Source:HGNC Symbol;Acc:HGNC:15880]	2.04765e-08	0.555649	0.143	0.074	0.000390671	CD4 T	All other cells	ND1_7.Neftel_2019_10x Lymphocytes	0.475417	0.230116	0.1	1000
MCL1	MCL1 apoptosis regulator, BCL2 family member [Source:HGNC Symbol;Acc:HGNC:6943]	2.41982e-08	0.279435	0.656	0.518	0.000461678	CD4 T	All other cells	ND1_7.Neftel_2019_10x Lymphocytes	3.81603	2.86135	0.1	1000
OXNAD1	oxidoreductase NAD binding domain containing 1 [Source:HGNC Symbol;Acc:HGNC:25128]	2.69627e-08	0.428396	0.408	0.268	0.000514421	CD4 T	All other cells	ND1_7.Neftel_2019_10x Lymphocytes	1.6751	1.05657	0.1	1000
TNFSF14	TNF superfamily member 14 [Source:HGNC Symbol;Acc:HGNC:11930]	2.7596e-08	0.600466	0.172	0.088	0.000526504	CD4 T	All other cells	ND1_7.Neftel_2019_10x Lymphocytes	0.646997	0.30977	0.1	1000
SOCS1	suppressor of cytokine signaling 1 [Source:HGNC Symbol;Acc:HGNC:19383]	3.52661e-08	0.418334	0.555	0.416	0.000672841	CD4 T	All other cells	ND1_7.Neftel_2019_10x Lymphocytes	3.49354	2.26506	0.1	1000
LITAF	lipopolysaccharide induced TNF factor [Source:HGNC Symbol;Acc:HGNC:16841]	3.63674e-08	-0.583923	0.321	0.429	0.000693853	CD4 T	All other cells	ND1_7.Neftel_2019_10x Lymphocytes	1.19603	2.22386	0.1	1000
TNFSF12	TNF superfamily member 12 [Source:HGNC Symbol;Acc:HGNC:11927]	4.14014e-08	0.650091	0.178	0.084	0.000789897	CD4 T	All other cells	ND1_7.Neftel_2019_10x Lymphocytes	0.60151	0.266187	0.1	1000
LYST	lysosomal trafficking regulator [Source:HGNC Symbol;Acc:HGNC:1968]	4.8954e-08	-0.766661	0.099	0.195	0.000933993	CD4 T	All other cells	ND1_7.Neftel_2019_10x Lymphocytes	0.340786	0.84882	0.1	1000
ZFP36L1	ZFP36 ring finger protein like 1 [Source:HGNC Symbol;Acc:HGNC:1107]	4.91347e-08	0.381839	0.504	0.376	0.00093744	CD4 T	All other cells	ND1_7.Neftel_2019_10x Lymphocytes	3.49332	2.35282	0.1	1000
CCL3	C-C motif chemokine ligand 3 [Source:HGNC Symbol;Acc:HGNC:10627]	5.78076e-08	-0.718198	0.41	0.5	0.00110291	CD4 T	All other cells	ND1_7.Neftel_2019_10x Lymphocytes	2.72952	5.7026	0.1	1000
ISG20	interferon stimulated exonuclease gene 20 [Source:HGNC Symbol;Acc:HGNC:6130]	6.02639e-08	-0.513794	0.707	0.729	0.00114977	CD4 T	All other cells	ND1_7.Neftel_2019_10x Lymphocytes	4.26204	7.19167	0.1	1000
ADI1	acireductone dioxygenase 1 [Source:HGNC Symbol;Acc:HGNC:30576]	9.63721e-08	0.434066	0.233	0.134	0.00183868	CD4 T	All other cells	ND1_7.Neftel_2019_10x Lymphocytes	0.752275	0.452163	0.1	1000
PFKFB3	6-phosphofructo-2-kinase/fructose-2,6-biphosphatase 3 [Source:HGNC Symbol;Acc:HGNC:8874]	9.67797e-08	0.520191	0.194	0.111	0.00184646	CD4 T	All other cells	ND1_7.Neftel_2019_10x Lymphocytes	0.714523	0.384158	0.1	1000
C3AR1	complement C3a receptor 1 [Source:HGNC Symbol;Acc:HGNC:1319]	9.76161e-08	0.484699	0.172	0.086	0.00186242	CD4 T	All other cells	ND1_7.Neftel_2019_10x Lymphocytes	0.53523	0.291227	0.1	1000
PLIN2	perilipin 2 [Source:HGNC Symbol;Acc:HGNC:248]	1.17066e-07	0.452346	0.302	0.195	0.0022335	CD4 T	All other cells	ND1_7.Neftel_2019_10x Lymphocytes	1.27745	0.776245	0.1	1000
PER1	period circadian regulator 1 [Source:HGNC Symbol;Acc:HGNC:8845]	1.17111e-07	0.549868	0.137	0.067	0.00223435	CD4 T	All other cells	ND1_7.Neftel_2019_10x Lymphocytes	0.458341	0.222177	0.1	1000
IFI44	interferon induced protein 44 [Source:HGNC Symbol;Acc:HGNC:16938]	1.46923e-07	0.321018	0.274	0.157	0.00280315	CD4 T	All other cells	ND1_7.Neftel_2019_10x Lymphocytes	0.995275	0.694524	0.1	1000
[truncated: 397 more rows]

## Sheet: Treg
gene	description	p_val	avg_logFC	pct.1	pct.2	p_val_adj	cluster.1	cluster.2	dataset	ave.norm.expr.1	ave.norm.expr.2	pseudocount	max.cells.per.ident
[truncated: 1,874 more rows]

## Sheet: IFN T
gene	description	p_val	avg_logFC	pct.1	pct.2	p_val_adj	cluster.1	cluster.2	dataset	ave.norm.expr.1	ave.norm.expr.2	pseudocount	max.cells.per.ident
[truncated: 1,310 more rows]

[truncated: 6 more sheets: CD8 T GZMK, CD8 T Prolif, NKT cells, NK KRT81 KLRC1, NK FGFBP2, B]
